# Supplementary material for: BET family members Bdf1/2 modulate global transcription initiation and elongation in Saccharomyces cerevisiae
Source: eLife journal article supplement (doi:10.7554/elife.69619), 2021-06-17

# Figure 3–figure supplement 1–source data 3

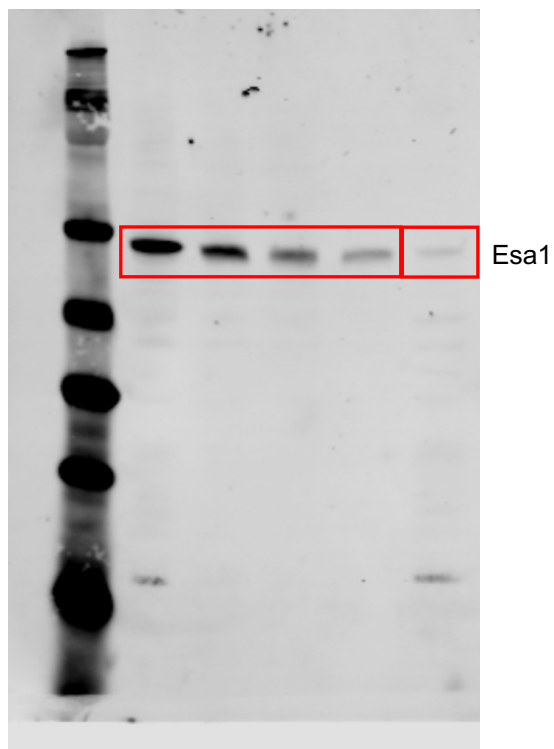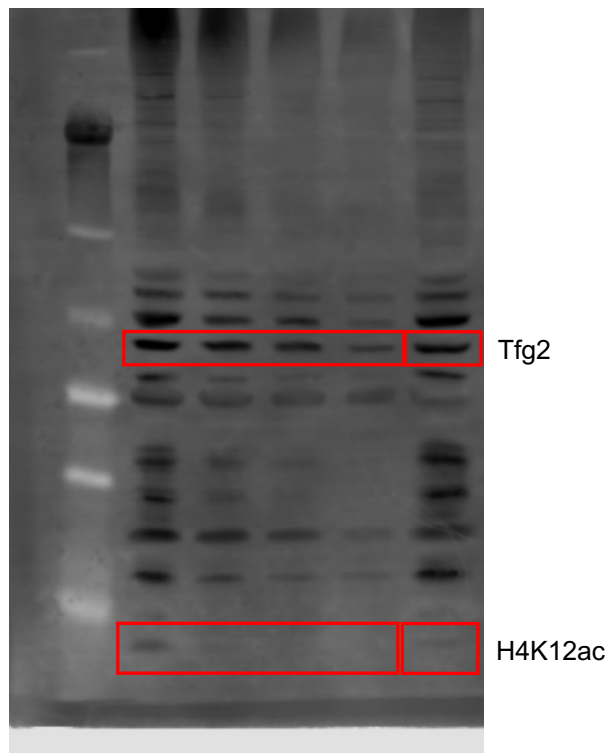

Supplement: supp [file elife-69619-supp-v1.zip]
