# Supplementary material for: BET family members Bdf1/2 modulate global transcription initiation and elongation in Saccharomyces cerevisiae
Source: eLife. 2021 Jun 17;10:e69619. doi: 10.7554/eLife.69619 (PMC8266393; doi:10.7554/eLife.69619)
Supplement: Supplementary file 1. — Related to Figures 1 and 3. [file elife-69619-supp1.xlsx]

## Sheet: index
2A	Spike-in normalized HTseq-count results for 5313 yeast genes with detectable signal for all 4thio-U RNA-seq samples collected in this work.
2B	Coefficient of variation (CV) values for 5313 yeast genes for all 4-thioU RNA-seq experiments.
2C	Log2 change in transcription for 4883 genes following degradation (deg) or deletion (d) of different factors, as indicated. Previously published data for Taf1, Taf13, Spt3/7 and spt7 deletion (dspt7) experiments are included (Donczew et al., 2020). Mean value of replicate experiments is shown.
2D	Log2 change in transcription following 6h pan-BET degradation using dBET6 in MOLT4 T-ALL cells (Winter et al., 2017). The presence or absence of the TATA box in the most representative promoter for each gene is indicated. Data for 12940 most highly expressed genes from the original dataset are included.

## Sheet: 2A
gene_id	Bdf1_A_DMSO	Bdf1_A_IAA	Bdf1_B_DMSO	Bdf1_B_IAA	Bdf2_A_DMSO	Bdf2_B_DMSO	Bdf2_A_IAA	Bdf2_B_IAA	WT_A	WT_B	dbdf2_A	dbdf2_B	Bdf1dbdf2_A_DMSO	Bdf1dbdf2_A_IAA	Bdf1dbdf2_B_DMSO	Bdf1dbdf2_B_IAA	Bdf1/2_A_DMSO	Bdf1/2_B_DMSO	Bdf1/2_C_DMSO	Bdf1/2_A_IAA	Bdf1/2_B_IAA	Bdf1/2_C_IAA	H2A.Z_A_DMSO	H2A.Z_A_IAA	H2A.Z_B_DMSO	H2A.Z_B_IAA	Ssl2_A_DMSO	Ssl2_B_DMSO	Ssl2_C_DMSO	Ssl2_A_IAA	Ssl2_B_IAA	Ssl2_C_IAA	Toa1_A_DMSO	Toa1_B_DMSO	Toa1_C_DMSO	Toa1_A_IAA	Toa1_B_IAA	Toa1_C_IAA	Esa1_A_DMSO	Esa1_A_IAA	Esa1_B_DMSO	Esa1_B_IAA
YAL001C	18.56	11.49	21.42	10.51	51.38	39.9	43.58	37.45	35.69	39.21	28.46	35.95	17.1	2.51	12.99	1.13	30.88	30.4	37.19	4.56	5.35	5.31	23.92	24.37	19.46	24.23	94.62	213.85	245.36	2.91	3.17	2.48	29.49	29.51	39.55	0.71	1.64	0.93	40.88	13.67	46.16	13.69
YAL002W	10.71	6.67	13.68	5.72	40.11	32.54	32.97	28.81	29.74	33.83	23.89	28.82	7.7	1.45	6.86	0.89	23.65	23.79	26.77	3.68	3.94	4.47	16.34	17.29	10.83	13.41	52.71	116.9	125.76	5.23	4.42	4.16	16.78	14.77	20.15	1.04	1.87	1.2	19.73	8.22	22.14	8.01
YAL003W	131.3	136.94	117.38	107.81	143.78	119.09	111.39	115.49	175.7	159.31	127.2	134.88	93.49	98.63	69.19	42.43	141.15	118.47	107.43	108.23	109.08	108.21	148.65	137.31	89.11	112.67	367.7	432.29	459.92	15.81	15.35	14.63	111.14	124.69	124.13	6.38	6.25	6.09	153.25	78.24	170.17	105.17
YAL005C	184.89	177.3	181.07	120.43	59.42	50.25	46.1	38.55	34.02	46.08	24.38	33.82	73.6	81.42	66.11	31.34	143.53	143.94	106.75	83.34	70.09	68.9	244.99	256.29	86.31	126.43	271.25	347.71	455.65	8.08	9.12	7.38	142.94	185.35	156.19	4.61	9.42	3.84	81.74	116.35	114	124.54
YAL007C	25.21	19.54	22.62	15.51	38.19	36.97	30.07	30.38	32.38	37.13	28.71	39.01	15.27	5.86	15.89	3.49	34.35	32.2	24.66	12.24	11.38	13.12	26.09	24.33	15.99	22.69	93.84	144.31	174.29	7.04	6.54	6.44	30.3	30.04	37.41	2.26	3.65	2.66	43.18	8.92	50.87	16.28
YAL008W	3.88	1.1	3.9	1.03	4.4	2.8	2.67	2.8	4.46	3.89	2.99	3.03	2.63	0.15	1.92	0.11	3.13	2.84	2.6	0.28	0.27	0.43	3.58	3.29	2.14	2.98	13.14	18.73	18.91	0.25	0.25	0.18	3.2	3.75	4.98	0.07	0.09	0.1	5.02	0.3	8.15	0.44
YAL009W	2.18	1.08	2.47	0.85	5.06	3.63	4.2	3.54	5.9	5.27	4.06	4.42	1.68	0.03	1.21	0.02	3.49	2.45	2.82	0.23	0.31	0.24	2.47	1.67	2.05	2.18	7.95	16.16	19.19	0.69	0.52	0.6	2.72	3.03	3.61	0.18	0.2	0.18	4.1	0.67	4.31	0.9
YAL010C	8.88	3.95	9.37	4.35	23.47	19.66	17.98	18.25	22.43	24.98	17.29	21.15	4.34	0.17	5.48	0.15	15.12	13.41	12.76	1.1	1.24	1.36	11.39	10.65	9.19	10.81	31.88	73.72	76.33	1.52	1.32	1.81	9.84	10.82	12.9	0.26	0.41	0.24	14.71	1.06	16.77	3.05
YAL011W	9.35	5.58	10.44	4.17	31.18	25.97	26.24	22.32	32.84	35.43	24.34	26.13	4.88	0.16	5.17	0.23	19.86	19.5	21.54	1.25	1.41	1.68	9.9	7.02	8.88	8.07	48.11	107.73	114	4.05	4.33	4.23	17.03	16.19	21.99	1.16	1.74	0.98	20.13	3.25	21.64	2.78
YAL012W	312.73	387.66	291.13	282.07	273.75	262.08	212.15	230.88	299.39	291.55	252.95	264.47	52.57	57.87	194.36	128.51	405.79	350.64	331.02	375.52	302.96	342.64	374.39	333.16	278.98	295.66	233.14	382.12	405.65	18.91	19.99	19.48	306.02	272.61	226.02	12.99	15.52	8.96	126.32	50.24	118.52	58.4
YAL013W	45.67	30.21	47.19	24.46	91.97	74.29	68.74	66.72	111.19	107.71	87.42	85.76	23.56	7.84	32.38	6.82	66.91	52.24	51.62	21.39	20.03	23.28	68.54	62.23	53.85	68.59	121.83	290.95	288.22	12.6	12.61	13.44	82.45	79.69	97.11	6.65	9.36	5.7	90	35.42	99.22	29.26
YAL014C	12.5	7.49	11.39	5.53	15.2	16.16	13.97	12.93	20.34	19.82	17	15.75	5.57	0.65	7.81	1.39	14.01	12.45	9.9	5.05	4.1	4.47	13.96	14.93	9.35	11.54	22.92	49.76	51.19	2.78	2.36	2.32	11.63	13.47	13.91	0.96	1.06	0.95	12.28	2.99	14.73	3.51
YAL015C	4.41	2.01	4.84	1.55	11.51	9.36	8.06	8.24	11.32	11.85	9.17	8.83	2.06	0.22	2.48	0.46	8.14	6.41	7.48	2.03	1.77	2.57	6.86	6.15	7.6	8.39	15.83	35.37	36.34	0.89	0.75	0.72	6	5.66	6.32	0.09	0.12	0.11	8.28	1.08	8.75	1
YAL016W	10.11	8.36	12.21	7.16	27.21	19.39	23.4	18.85	25.78	26.58	19.65	21.79	8.51	1.54	6.09	0.59	17.63	16.45	19.1	3.88	4.16	4.29	13.17	10.95	10.12	10.76	47.48	93.74	100.83	5.35	5.41	4.17	13.27	13.17	15.92	1.97	2.82	2.22	17.68	5.3	18.29	5.36
YAL017W	18.34	15.65	23.91	13.61	47.17	35.92	43.17	36.14	39.19	41.9	29.45	34.94	18.37	1.85	12.02	0.6	35.96	38.76	40.56	5.86	5.49	5.89	19.38	20.03	11.79	14.08	109.11	228.08	245.36	8.63	7.57	6.91	26.34	26.69	35.5	1.99	2.77	2.45	38	12.4	45.12	12.9
YAL019W	27.55	16.75	33.09	14.68	94	72.52	84.55	65.3	91.13	93.76	68.13	80.47	17.38	1.28	12.63	0.85	45.6	44.63	47.56	4.19	5.99	5.7	36.23	28.05	35.78	37.27	116.91	270.37	255.87	12.2	12.66	12.51	33.28	36.74	42.09	3.45	5.96	3.48	41.32	6.99	38.97	6.6
YAL020C	11.75	5.83	12.78	5.31	15.62	12.71	10.81	10.4	16.03	16.7	12.69	11.84	4.97	0.17	6.03	0.19	11.49	8.11	7.93	0.91	0.97	0.8	12.58	10.63	8.89	10.87	21.91	48.8	45.66	2.24	1.86	1.75	15.13	13.99	15.05	0.39	0.41	0.35	14.49	1	18.08	0.9
YAL021C	53.1	33.29	54.6	28.11	149.94	129.05	120.38	118.22	149.75	162.8	125.17	145.87	36.67	2.14	36.27	1.24	112.48	102.5	87.09	12.14	13.18	12.62	64.96	59.26	44.38	55.12	175.43	394.82	437.79	11.69	11.04	11.93	62.29	68.31	80.38	4.49	6.44	4.21	74.02	12.79	84.14	19.09
YAL022C	4.91	2.98	6.5	2.58	17.96	16.38	14.67	14.07	23.44	22.69	16.78	18.49	3.68	0.25	2.92	0.12	12.93	11.52	12.43	1.23	1.39	1.77	6.88	4.85	5	6.41	28.07	53.78	58.12	2.3	1.98	2.34	8.99	8.17	9.6	0.48	0.61	0.46	12.06	1.21	11.43	1.71
YAL023C	24.09	18.21	29.35	16.71	83.28	68.82	73.27	67.04	77.02	73.3	61.41	68.46	25.98	12.5	18.25	4.02	65.97	60.46	61.09	23.29	20.54	25.31	36.54	31.89	29.11	35.13	152.93	263.05	293.54	7.79	7.43	7.31	47.66	46.19	54.8	3.26	6.03	3.47	55.11	22.4	62.15	26.3
YAL024C	16.52	11.35	20.61	10.17	56.26	45.45	50.04	43.46	45.54	43.5	34.96	40.21	11.26	1.4	10.22	0.75	30.35	30.9	36.9	3.85	5.07	5.09	23.28	21.51	20.33	22.9	76.15	179.12	172.12	7.12	6.55	6.17	24.85	22.83	29.73	1.33	3.38	1.48	32.73	10.8	35.16	10.06
YAL025C	99.1	64.34	93.84	48.62	152.57	128.83	120.99	101.3	177.09	170.97	149.75	149.91	38.94	8.5	53.32	6.46	92.54	77.75	74.84	16.81	17.75	18.94	134.88	98.45	130.24	147.2	166.25	434.06	390.94	19.52	19.07	20.18	81.79	91.02	100.62	11.72	14.56	12.61	94.69	13.15	88.43	10.38
YAL026C	14.36	9.1	15.96	7.75	36.66	27.09	30.39	25.67	32.69	35.69	24.45	30.95	9.51	0.46	7.89	0.24	21.69	23.15	22.31	2.19	2.39	2.29	12.6	10.4	10.65	12.27	61.25	132.17	132.42	3.62	3.87	3.96	16.18	17.59	20.48	0.99	2.22	1.26	21.91	6.67	23.03	4.92
YAL027W	2.08	0.85	2.71	0.92	4.9	4.4	3.04	3.31	6.33	5.62	4.26	4.15	1.24	0.07	1.21	0.02	3.66	2.7	2.65	0.28	0.23	0.13	2.23	1.99	2.01	1.81	8.92	20.58	19.05	0.48	0.33	0.41	2.97	3.05	4.5	0.05	0.11	0.06	5.02	0.39	5.47	0.89
YAL028W	2.04	1.2	3.08	1.05	8.03	7.15	6.23	6.82	9.25	11.29	6.38	6.65	2.74	0.43	1.72	0.19	6.64	6.04	6.26	1.07	1.27	1.16	1.82	1.24	0.7	0.72	17.54	35.62	40.68	1.75	1.63	1.67	4.93	5.42	6.36	0.18	0.24	0.27	7.04	0.84	11.65	1.24
YAL029C	37.96	27.23	45.64	26.39	115.31	89.43	96.75	85.71	92.16	97.17	69.73	94.67	24.66	8.54	19.79	3.3	66.02	69.41	74.23	14.64	15.61	17.17	59	50.53	47.3	54.73	166.63	345.06	361.95	17.59	16.04	15.91	42.17	43.42	52.98	4.59	6.53	4.6	56.05	24.51	57.35	26.91
YAL030W	3.48	2.36	3.62	1.89	2.87	2.55	1.62	2.32	3.07	2.64	2.48	2	2.71	0.27	2.16	0.14	3.02	2.2	1.78	0.52	0.48	0.58	2.47	2.04	1.5	1.35	14.07	14.07	17.79	0.69	0.84	0.92	3.89	4.42	4.48	0.32	0.17	0.22	5.64	0.63	5.93	1.17
YAL031C	9.31	6.06	12.98	6.28	32.53	26.97	27.22	28.54	32.94	31.54	21.28	24.99	6.59	0.36	5.61	0.19	23.14	21.27	26.72	2.42	2.41	2.83	9.4	7.87	8.54	7.8	42.03	95.67	99.01	3.03	3.3	2.85	14.29	13.31	17.28	1.5	1.26	1.3	18.73	2.97	21.54	4.41
YAL032C	10.87	7.76	12.36	6.43	21.25	19.94	16.87	15.7	27.32	24.93	20.48	19.82	5.42	0.39	5.83	0.2	16.61	11.88	13.21	2.06	1.75	2.22	9.99	5.92	7.41	9.28	31.84	73	71.91	4.25	3.95	3.33	13.43	11.91	16.81	1.35	1.15	1.31	20.56	2.6	22.67	2.98
YAL033W	3.17	2.01	3.28	1.32	3.42	2.25	2.61	2.32	5.39	4.18	3.68	3.62	2.22	0.15	1.58	0.09	2.45	1.64	1.97	0.16	0.34	0.28	4.02	3.47	3.45	3.83	10.68	20.26	16.81	0.58	0.79	0.66	4.03	3.74	4.8	0.26	0.43	0.24	6.21	1.02	7.52	0.9
YAL034C	7.35	5.68	8.95	5.41	32.53	28.74	27.72	27.41	30.65	33.67	23.85	27.83	7.18	9.06	5.75	3.18	25.39	22.9	23.51	14.96	11.33	16.12	9.72	11.71	6.88	9.34	33	74.21	88.58	3.25	2.78	3.14	10.35	9.12	12.7	0.43	0.83	0.56	18.84	3.31	22.85	13.22
YAL034W-A	7.37	2.85	7.4	2.53	11.43	10.08	9.65	9.18	10.61	11.11	7.63	9.82	4.35	0.14	4.63	0.14	7.83	7.2	6.48	0.57	0.48	0.58	7.6	7.11	6.68	8.03	20.16	45.91	45.87	0.75	0.76	0.69	9.65	8.86	12.92	0.21	0.57	0.41	12.98	1.13	16.02	1.36
YAL035W	109.79	78.38	122.85	65.21	261.01	184.58	211.54	171.12	254.33	252.18	190.28	236.9	79.22	16.29	62.43	7.43	152.53	144.49	184.15	29.08	32.47	33.8	139.08	113.12	117.16	128.59	484.2	854.12	904.64	50.74	50.78	50.25	141.41	164.86	179.03	24.86	37	25.25	174.25	59.96	167.35	35.09
YAL036C	25.58	18.75	28.74	16.62	45.67	34.77	34.94	28.56	45.44	40.59	31.83	36.27	14.2	2.97	12.63	1.88	28.75	25.15	28.15	5.79	6.4	5.7	28.65	18.97	33.53	31.57	76.48	180.73	184.72	10.92	11.66	11.51	39.01	47.42	48.97	4.21	8.57	5.51	44.8	3.29	42.27	3.27
YAL037W	0.24	0.16	0.46	0.16	1.79	1.65	1.33	1.01	1.81	1.46	0.87	0.77	0.2	0.13	0.14	0.06	0.68	0.77	0.7	0.15	0.21	0.17	0.16	0.16	0.15	0.25	2.39	8.44	6.09	0.14	0.17	0.18	0.41	0.39	0.49	0.02	0.01	0.01	0.78	0.46	1.24	0.36
YAL038W	243.49	326.4	274.83	335.87	1148.95	982.8	1017.33	898.32	1031.07	1211.67	921.6	1241.75	313.4	583.96	166.56	182.06	872.78	870.31	752.43	1098.47	986.59	1131.85	359.24	314.78	224.07	240.1	2541.3	2396.43	2600.62	215.57	207.4	208.53	389.03	472.9	516.64	98.6	98.24	111.62	575.99	806.5	582.87	631.53
YAL039C	8.09	5.58	8.35	4.66	16.78	15.83	12	13.25	28.43	22.91	18.05	16.1	3.75	1.49	4.07	0.98	14.29	8.88	10.35	6.43	5.14	7.42	14.91	13.44	11.83	14.68	30.98	60.46	67.71	1.24	1.21	1.1	14.38	15.05	16.12	0.26	0.35	0.24	22.4	13.35	22.04	12.52
YAL040C	37.11	62.28	53.49	57.71	255.92	212.42	234.93	211.21	199.95	254.1	166.21	218.01	38.12	72.46	27.96	24.67	141.81	158.66	163.76	152.29	147.47	181.39	50.61	55.03	34.85	45	155.58	391.37	453.76	23.91	21.37	22.06	34.38	27.29	37.91	3.28	4.39	3.3	102.66	90.88	128.43	205.17
YAL041W	33.82	23.81	40.62	20.31	114.07	91.73	91.45	81.02	95.09	105.1	82.76	88.74	17.92	1.27	18.97	0.86	70.54	71.91	70.5	8.54	9.51	8.87	38.82	32.67	34.86	37.78	119.71	279.86	295.64	9.76	9.42	9.5	42.93	41.69	54.74	4.84	6.25	5.34	50.44	8.85	54.83	11.31
YAL042W	21.82	14.85	24.41	13.03	32.32	28.49	26.56	25.53	38.61	38.04	30.25	31.5	15.24	2.87	13.99	1.61	30.94	25.29	24.09	6.2	6.1	6.73	22.33	19.53	16.08	20.53	95	159.75	150.83	6.39	6.76	7.26	35.69	38.34	43.36	2.67	2.89	2.65	37.54	9.35	45.22	6.54
YAL043C	21.95	17.75	26.17	15.21	85.47	68.17	70.8	64.47	85.94	86.75	62.22	66.12	13.14	2.81	13.25	1.61	57.55	55.44	58.89	12.33	12.38	14.3	25.61	19.27	22.51	23.56	92.46	224.79	259.02	12.82	11.92	12.77	34.77	31.69	39.76	4.16	4.92	3.72	37.92	11.34	46.63	12.55
YAL044C	6.35	4.31	5.87	2.63	6.61	6.45	5.1	5.81	7.91	7.01	6.29	5.35	6.75	4.39	3.96	1.59	6.15	5	4.06	3.05	3.01	2.52	10.94	10.04	7.8	11.38	63.42	71.87	70.65	2.99	2.64	2.6	12.8	14.31	19.79	0.8	0.6	0.94	38.29	9.35	42.17	11.14
YAL044W-A	2.21	0.74	1.7	0.42	3.06	2.2	2.03	1.77	3.96	3.86	2.7	2.9	0.96	0.13	0.8	0.04	2.45	1.43	1.52	0.16	0.14	0.26	1.75	1.65	1.14	1.78	8.66	11.66	11.48	0.66	0.63	0.39	2.41	2.96	3.75	0.21	0.18	0.2	3.94	0.13	4.01	0.24
YAL046C	1.09	0.59	1.07	0.43	1.16	0.9	0.72	0.83	1.69	0.96	1.09	0.88	0.7	0.03	0.53	0.04	1.02	0.59	0.59	0.16	0.14	0.09	1.48	1.23	0.87	1.17	5.56	6.67	9.24	0.08	0.06	0.27	1.72	1.79	2.23	0.02	0.03	0.01	3.43	0.09	3.28	0.32
YAL047C	3.17	1.21	3.45	1.03	6.85	5.33	5.94	5.19	6.33	5.89	4.31	5.69	1.6	0.04	1.54	0.01	3.96	3.34	3.73	0.11	0.25	0.17	2.6	1.8	2.29	1.91	14.22	30.87	33.96	0.82	0.52	0.73	3.99	4.35	5.04	0.08	0.1	0.11	6.72	0.35	6.13	0.56
YAL048C	4.09	2.01	4.9	2.2	19.46	14.53	15.8	14.14	18.72	19.68	13.54	17.14	3.01	0.28	2.39	0.17	9.25	9.86	10.3	1.15	0.85	1.21	3.92	2.81	3.78	3.42	21.28	48.88	59.94	1.86	1.55	1.55	6.31	6.31	8.32	0.19	0.55	0.35	9.18	1.49	10.06	2.01
YAL049C	4.62	2.9	5.37	2.69	8.51	5.35	5.8	6.66	7.46	7.46	5.96	6.36	2.8	0.25	2.5	0.08	5.96	4.61	5.14	0.8	0.79	0.5	3	2.4	2.61	2.45	21.05	36.66	36.2	1.19	1.43	1.17	4.23	4.51	5.33	0.21	0.31	0.23	6.37	1.51	7.42	1.4
YAL051W	16.8	10.72	20.23	8.91	62.76	53.96	53.46	47	48.64	55.08	40.06	47.87	10.95	2.39	11.02	1.3	38.86	42.13	40.99	6.28	7.68	8.46	20.9	21.81	15.36	19.29	65.58	143.67	162.6	2.94	2.72	2.75	21.98	21.32	27.44	0.43	0.92	0.41	28.15	6.8	31.7	9.6
YAL053W	12.32	9.17	13.98	8.31	44.77	36.22	40.04	36.35	28.3	34.2	26.21	30.12	8.52	3.41	7.21	1.79	33.33	33.15	28.74	12.74	13.33	15.21	20.21	19.23	16.24	22.8	62.86	116.33	128.49	5.21	4.77	4.87	20.19	20.22	25.52	0.94	1.39	0.82	28.28	11.14	29.84	18.39
YAL055W	7.71	3.84	8.1	2.85	7.08	6.8	6.09	5.79	7.61	8.07	6.74	5.96	5.07	0.32	5.29	0.14	7.93	6.09	4.29	0.73	0.54	0.65	6.19	5.39	4.21	4.98	27.1	59.98	53.99	1.43	1.32	1.17	13.63	14.35	17.92	0.17	0.39	0.14	20.48	0.54	22.95	1.63
YAL056W	13.59	10.19	16.63	9.1	29.6	22.36	29.63	21.97	28.65	29.41	20.61	24.16	8.92	1.05	7.4	0.52	17.16	18.15	19.9	2.4	2.96	3.56	14.99	13.03	14.22	15.88	60.13	123.73	139.21	6.77	6.54	6.18	17.3	17.29	22.36	1.78	2.41	2.05	22.88	8.03	25.95	8.03
YAL058W	3.71	1.2	3.98	1.08	12.12	10.46	10.21	8.2	12.7	12.81	8.95	10.24	2.05	0.05	1.87	0.05	7.13	5.63	6.19	0.34	0.37	0.28	3	1.94	2.66	2.95	17.84	31.11	32.21	0.63	0.66	0.7	5.52	5.7	5.53	0.06	0.23	0.09	7.34	0.2	6.71	0.44
YAL059W	19.91	8.97	16.57	7.8	24.18	21.29	17.48	16.99	26.34	29.03	23.29	24.93	5.75	0.33	9.42	0.38	14.29	12.61	9.95	0.71	1.21	1.06	24.05	16.73	20.95	26.28	26.91	68.1	59.24	2.04	2.51	2.22	13.77	17.91	18.67	0.73	0.86	0.97	14.36	0.59	13.62	0.51
YAL060W	2.05	1.84	2.9	1.98	6.45	5.13	5.04	5.51	7.11	6.98	5.26	5.85	3.36	4.99	1.52	0.66	4.72	3.73	3.57	5.4	5.21	4.79	2.83	3.39	1.9	2.6	17.8	23.31	32.84	1.3	0.97	1.01	5.51	4.82	7.19	0.11	0.2	0.13	15.36	8.85	16.72	9.92
YAL061W	3.22	4.36	4.17	4.97	7.48	7.15	9.19	8.47	5.19	5.38	4.35	4.04	19.91	29.76	6.38	6.09	24.73	18.84	20.83	43.5	39.16	48.97	1.53	2.35	1.1	1.57	6.46	9.97	13.3	0.16	0.35	0.31	5.93	5.03	6.87	0.1	0.28	0.15	6.56	7.27	8.2	7.25
YAL062W	1.34	0.75	0.78	0.54	2.24	2.2	1.68	1.77	3.25	3.01	2.23	1.44	0.75	0.68	0.52	0.28	1.53	1	0.82	0.28	0.31	0.37	0.9	0.6	0.71	0.78	3.02	4.18	6.23	0.2	0.12	0.15	1.6	1.65	2.33	0.06	0.09	0.05	3.59	0.06	2.75	0.16
YAL063C	0.14	0.05	0.26	0.07	0.42	0.58	0.43	0.39	0.83	0.43	0.67	0.48	0.14	0.03	0.2	0.03	0.38	0.64	0.19	0.02	0.08	0.02	0.45	0.34	0.23	0.54	0.34	1.05	1.05	0.32	0.31	0.41	0.22	0.23	0.26	0.09	0.06	0.07	0.32	0.02	0.2	0.06
YAL064W-B	0.1	0.18	0.23	0.12	0.79	0.3	0.67	0.53	0.86	0.59	0.36	0.27	0.15	0.03	0.11	0.02	0.36	0.36	0.54	0.03	0.06	0.13	0.21	0.11	0.23	0.19	1.19	2.09	2.8	0.1	0.06	0.07	0.19	0.14	0.38	0.01	0.01	0.01	0.49	0.19	0.66	0.02
YAR002C-A	7.25	4.62	7.62	4.37	8.85	7.93	7.68	7	9.55	8.52	7.81	6.89	5.27	0.74	4.73	0.48	8.04	6.34	5.75	1.77	1.54	2.01	9.61	8.57	7.44	10.03	28.63	32.64	32	1.51	0.91	1.37	7.22	8.75	9.3	0.64	0.67	0.41	9.39	3.46	11	2.11
YAR002W	17.69	14.3	21.4	11.02	54.6	43.9	44.77	38.78	61.04	57.59	45.53	53.72	12	4.02	9.09	2.01	36.83	32.9	37.05	11.52	11.68	13.12	27.83	23.69	21.96	26.45	59.24	134.74	149.22	4.31	4.49	4.45	22.45	24.52	26.59	1.54	2.48	1.61	30.41	7.73	32.66	9.28
YAR003W	4.77	3.19	5.3	3.33	10.17	9.86	8.96	8.27	10.89	9.75	7.76	9.42	2.98	0.48	2.93	0.33	8.14	6.68	6.48	1.57	2.08	1.7	5.53	4.92	4.69	6.02	12.28	27.33	28.29	1.62	1	1.46	5.3	4.98	5.55	0.37	0.53	0.38	6.69	2.27	7.62	1.81
YAR007C	9.92	6.14	11.78	5.63	38.03	29.04	32.15	31.59	28.65	25.49	20.86	22.14	9.44	1.63	6.25	0.77	26.69	26.52	24.87	5.97	6.09	5.63	16.57	14.1	12.26	13.78	59.87	118.99	141.59	3.63	3.56	3.48	18.59	16.64	20.39	0.58	1.37	0.52	21.21	4.52	23.2	6.6
YAR008W	10.66	7.11	10.28	5.71	24.13	22.39	18.93	17.45	17.21	17.31	15.21	15.35	5.09	1.44	7.76	0.92	16.65	14.16	11.07	2.68	3.34	2.93	10.2	10.65	7.82	11.45	26.65	58.61	69.88	2.2	1.99	1.91	14.09	11.52	17.8	0.39	0.92	0.37	16.6	0.86	18.61	2.11
YAR014C	30.82	21.43	35.27	19.58	72.27	57.01	63.58	55.45	76.69	76.68	59.23	68.81	18.35	2.82	18.16	2.12	46.06	46.15	45.87	7.12	7.87	8.28	42.95	34	35.86	48.59	118.92	278.09	285.42	15.26	14.21	13.87	36.25	39.55	48.24	3.57	4.42	3.6	50.82	14.61	55.66	16.59
YAR015W	3.6	1.56	3.6	1.41	9.22	7.4	7.13	6.06	12.32	9.54	8.9	9.13	2.4	0.24	1.57	0.17	5.62	4.86	5.44	0.84	1.07	1.14	4.53	3.52	4.5	4.19	24.86	47.03	37.39	1.6	1.19	1.37	5.35	6.35	7.33	0.31	0.45	0.34	12.12	1.12	9.61	1.9
YAR018C	7.47	4.78	7.87	4.33	14.04	11.06	13.37	11.14	17.97	16.62	11.04	12.51	6.16	3.13	4.11	1.12	9.83	7.32	8.54	4.3	4.45	5.35	13.35	11.87	8.16	9.27	47.29	101.06	106.58	5.9	4.86	4.96	11.66	10.29	13.79	0.92	1.39	0.9	26.88	3.27	28.6	3.14
YAR019C	7.5	4.3	9.22	3.74	38.61	28.29	28.62	28.19	31.43	37.56	22.31	28.13	4.71	0.13	4.12	0.09	20.46	21.74	22.31	0.97	1.17	1.14	7.02	6.08	5.62	5.74	35.87	88.11	101.75	2.42	2.4	2.12	11.15	10.72	14.6	0.24	0.62	0.33	17.03	1.36	16.52	2.14
YAR023C	0.45	0.31	0.49	0.16	1.32	1.18	1.3	1.22	1.26	1.57	1	1.2	0.23	0.03	0.27	0.02	1.09	1.18	1.01	0.06	0.04	0.13	0.55	0.44	0.33	0.37	1.53	4.34	4.83	0.15	0.25	0.19	0.46	0.53	0.3	0.03	0.07	0.04	0.78	0.04	1.31	0.06
YAR027W	4.18	2.22	5.2	2.05	6.98	6.45	4.96	5.76	7.86	7.54	5.6	5.72	4.3	0.61	3.02	0.09	5.57	4.48	4.53	0.89	0.83	0.88	4.72	5.6	3.42	4.65	19.86	38.59	41.87	1.87	1.55	1.37	6.95	8.21	9.4	0.37	0.4	0.4	12.17	0.39	14.17	0.6
YAR028W	2.11	0.9	2.77	1.12	3.45	3.08	2.52	2.34	4.61	4.63	2.9	3.94	1.85	0.81	1.04	0.11	1.96	1.98	1.64	0.55	0.3	0.5	1.88	1.88	1.46	1.35	9.26	14.39	16.46	0.48	0.46	0.42	2.62	4.24	4.5	0.06	0.1	0.16	3.1	0.35	4.14	0.22
YAR029W	0.7	0.3	0.61	0.33	0.79	1.3	0.75	0.67	1.94	1.15	1.29	1.28	0.41	0.27	0.28	0.06	0.45	0.7	1.06	0.19	0.13	0.06	0.58	0.37	0.37	0.34	1.23	3.3	2.52	0.34	0.32	0.32	0.82	1.02	1.07	0.08	0.14	0.09	0.81	0.07	1.03	0.17
YAR035W	0.52	0.75	0.61	0.54	1.98	1.7	1.07	1.52	1.36	1.25	1.14	0.88	0.41	0.3	0.32	0.2	1.26	0.84	0.89	0.96	0.75	0.95	0.37	0.32	0.25	0.33	5.71	11.82	9.24	1.51	1.64	1.57	2.21	2.58	2.88	0.05	0.13	0.05	4.51	1.95	4.89	1.67
YAR042W	38.13	26.23	49.69	24.32	144.09	107.49	116.79	102.58	124.7	131.69	94.52	107.69	29.64	6.7	20.73	2.7	74.59	74.1	71.35	14.39	16.02	16.05	56.68	51.37	46.15	48.83	169.24	369.82	407.96	12.2	12.16	11.49	59.88	60.96	72.83	3.58	5.21	3.51	73.27	18.61	78.69	17.72
YAR050W	0.62	1	0.81	0.82	4.08	3.25	3.51	4.18	5.75	5.19	3.86	4.82	1.02	0.28	0.42	0.06	2.62	2	2.49	0.6	0.68	0.86	0.35	0.3	0.26	0.45	3.96	11.82	13.16	3.75	2.91	3.62	2.11	1.1	1.92	0.82	1.11	1.13	3.24	0.59	3.23	1.06
YBL001C	2.79	1.41	2.73	0.91	3.19	2.5	2.64	3.08	3.2	4.16	2.48	2.5	2.48	0.68	2.15	0.36	3.3	2.86	2.09	0.96	0.79	0.56	5.29	6.9	3.01	6	18.7	15.03	17.44	0.72	0.81	0.62	4.47	4.23	4.62	0.31	0.28	0.29	9.2	0.93	9.36	3.14
YBL002W	37.33	46.02	35.13	39.7	82.02	71.97	68.77	72.14	65.07	66.27	60.7	69.24	40.14	65.43	30.85	27.12	67.59	57.3	42.3	77.63	67.39	77.49	58.58	66.33	37.18	55.91	81.26	150.02	154.33	1.18	0.95	1.13	36.88	46.56	48.08	2.99	5.5	2.99	51.54	16.57	56.98	36.55
YBL003C	13.89	16	12.86	13.38	14.64	13.56	12.41	14.67	18.22	13.37	13.3	12.45	13.98	21.27	9.92	9.08	13.21	10.34	10.63	15.14	16.78	15.68	21.3	24.49	12.7	21.51	44.79	56.12	54.41	0.81	0.54	0.38	14.97	18.9	18.63	3.45	4.4	3.48	18.35	7.23	20.76	13.39
YBL004W	58.14	39.24	63.14	33.54	144.2	97.56	118.73	95.1	142.29	148.2	114.75	143.71	25.79	8.42	26.04	4.71	66.84	73.39	74.72	11.12	14.73	13.98	75.39	50.02	68.19	75.78	146.1	297.62	308.95	20.58	20.08	21.4	38.79	49.31	44.74	7.44	10.88	7.43	47.39	12.87	41.84	8.88
YBL005W	10.47	7.16	12.01	7.17	40.9	32.39	34.24	31.32	31.75	36.12	30.7	36.96	5.55	2.8	6.04	1.7	26.24	28.13	27.64	10.39	13.68	13.74	12.32	10.27	10	12.23	36.36	82.57	92.57	2.81	2.43	3.09	21.21	19.01	25.3	0.72	1.71	0.84	14.9	3.31	17.18	4.36
YBL006C	12.01	7.47	12.66	6.43	18.36	15.51	13.77	13.73	26.56	21.1	20.43	17.99	8.24	1.9	7.2	0.98	16.95	9.93	10.6	4.12	4.54	3.9	18.86	16.8	12.91	15.43	32.96	65.76	67.71	1.54	1.24	1.37	24.71	24.94	30.97	0.71	1.21	0.63	29.95	3.35	33.32	5.95
YBL007C	44.18	37.72	52.45	33.1	124.39	101.11	102.58	95.9	103.75	113.33	81.8	99.6	44.95	16.55	31.03	5.63	101.72	98.41	100.09	30.56	27.95	30.25	60.25	54.78	41.14	47.83	250.24	464.69	549.48	25.33	24.74	24.21	80.27	85.44	101.36	11.59	15.37	12.29	100.6	36.26	111.3	39.28
YBL008W	11.53	7.69	15.94	6.59	43.22	32.14	31.89	28.56	33.54	32.31	23.76	27.49	5.86	0.22	7.04	0.89	25.12	22.27	27.92	3.31	2.92	3.75	13.85	8.41	15.58	15.28	43.78	117.22	120.58	2.69	2.55	2.38	16.08	19.01	21.33	0.57	1.07	0.62	21.08	4.02	22.7	3.3
YBL009W	8.76	5.9	9.88	4.93	25.89	21.59	22.73	19.13	20.69	18.96	15.37	17.48	5.95	1.03	4.94	0.49	13.84	13.7	15.63	2.27	2.31	2.35	11.62	9.74	9.98	11.72	37.66	86.1	86.34	2.17	1.96	1.82	10.89	12.92	14.28	0.48	1.23	0.47	13.95	2.57	15.69	3.66
YBL010C	7.38	5.09	8.37	3.64	16.12	14.11	14.35	11.98	15.68	15.4	12.29	12.27	4.82	0.48	4.57	0.28	12.76	11.25	11.31	1.67	1.63	1.79	9.32	8.3	7.5	8.12	27.02	60.3	68.55	1.89	1.39	1.8	11.39	12.63	15.7	0.26	0.57	0.22	15.25	4.26	17.05	4.35
YBL011W	19.49	14.87	21.94	12.47	44.43	37.95	40.21	34.58	51.44	50.58	40.8	43.37	14.51	4.96	12.38	2.85	33.37	32.88	31.72	11.08	11.06	11.99	27.52	27.28	20.31	27.39	66.18	142.06	145.09	3.49	3.23	3.52	26.24	22.34	29.69	0.69	1	0.65	30.12	25.62	33.49	17.47
YBL013W	3.13	2.28	3.52	1.99	8.93	8.23	7.31	7.42	7.51	7.54	5.53	6.15	1.76	0.31	2.04	0.21	8.19	7.43	7.16	1.3	1.04	1.45	2.22	2.9	1.53	2.51	13.36	32.4	33.26	0.37	0.32	0.35	4.96	4.12	5.67	0.04	0.12	0.05	5.13	2.16	6.38	2.28
YBL014C	19.25	17.05	19.3	13.99	66.24	49.23	52.83	45.69	56.83	62.65	45.57	57.85	7.02	2.09	10.18	1.45	36.49	37.51	41.22	7.32	7.38	8.78	13.79	8.03	15.23	12.86	61.44	135.63	155.03	9.11	8.5	9.15	19.68	19.83	24.89	2.43	3.87	2.56	18.78	8.39	20.48	7.82
YBL015W	3.19	3.18	3.51	2.58	6.4	5.65	5.65	5.1	5.19	4.26	4.17	4.07	5.9	6.51	2.56	1.52	6.63	6.34	6.62	7.12	6	7.53	3.25	5.19	2.15	3.62	17.51	29.99	31.3	1.29	1.56	1.75	5.1	5.33	6.72	0.14	0.11	0.25	8.31	5.54	9.66	6.22
YBL016W	15.63	11.62	15.78	10.5	42.06	33.74	33.52	31.29	57.91	60.65	46.4	53.24	9.37	4.46	9.95	3.05	35.69	33.88	31.04	20.22	20.3	24.68	20.57	19.98	15.9	22.98	36.02	89.64	80.95	3.15	2.63	2.83	12.56	11.22	13.33	0.4	0.52	0.34	15.81	1.8	17.2	3.09
YBL017C	34.18	24.17	41.13	21.62	84.07	65.49	74.83	59.95	78.02	83.08	58.22	73.68	29.49	7.52	20.34	3.54	55.64	56.46	64.1	14.91	16.11	19.05	41.87	37.81	34.2	39.2	173.2	319.09	367.84	13.58	12.5	12.24	45.89	48.23	58.49	3.32	5.81	3.87	63.5	26.4	64.82	22.99
YBL018C	3.6	2.22	3.74	1.92	3.61	3.65	2.46	2.96	3.96	3.6	3.15	3.83	1.12	0.05	2.04	0.15	3.44	1.8	1.55	0.36	0.41	0.22	2.49	2.17	2.65	3.65	9.7	20.82	20.87	0.59	0.42	0.67	4.28	4.61	4.7	0.23	0.26	0.21	4.53	0.09	4.67	0.27
YBL019W	3.48	1.23	4.21	1.01	9.98	9.23	7.92	7.37	7.16	8.39	5.96	6.63	2.15	0.06	2.76	0.06	6.44	5.82	5.54	0.29	0.3	0.28	3.23	3.47	2.48	3.06	15.23	32.48	39.07	0.46	0.25	0.27	4.08	4.45	5.35	0.04	0.12	0.04	6.94	0.46	7.82	0.63
YBL020W	5.69	2.77	5.76	2.11	13.3	11.48	11.02	9.9	12.3	12.25	10.44	10.56	2.91	0.28	2.85	0.13	8.87	8.86	7.51	1.07	1.38	1.36	6.38	5.31	5.66	6.8	17.32	36.18	41.8	1.8	1.85	1.89	5.06	6.12	5.99	0.64	0.63	0.74	5.51	0.67	6.78	1.06
YBL021C	11.4	6.21	11.81	5.29	15.25	14.86	10	12.33	16.96	16.41	15.08	15.33	4.6	0.28	7.17	0.3	15.72	10.88	8.7	1.49	1.42	1.79	14.41	13.65	12.98	16.49	18.07	41.08	45.17	0.78	1.13	0.85	15.35	16.63	16.95	0.19	0.55	0.19	17	1.69	18.06	2.35
YBL022C	36.75	23.03	44.32	22	104.85	78.75	91.82	76.66	91.63	92.48	64.38	81.82	28.84	3.53	20.18	1.66	65.82	67.03	75.97	13.76	14.28	13.33	55.9	46.85	43.87	47.92	215.3	413.15	442.62	12.16	11.97	11.39	60.37	60.52	72.02	4.5	8.27	4.13	79.18	32.85	82.85	27.78
YBL023C	20.65	11.99	26.08	10.56	53.04	41.12	45.72	36.94	48.13	49.49	35.6	44.2	15.01	1.2	12.59	0.69	29.29	31.58	35.19	3.1	3.41	3.47	30.98	25.81	23.61	28.36	91.6	226.23	254.4	6.86	6.64	7.4	32.53	30.99	42.11	1.53	3.21	1.47	46.93	9.56	51.33	7.87
YBL024W	23.11	15.72	24.8	14.24	52.46	40.7	44.39	38.02	50	54.34	40.51	47.23	14.49	3.72	11.03	1.77	30.33	32.47	31.81	6.64	7.48	7.42	30.61	23.5	25.94	28.6	88.87	167.87	174.92	9.65	8.36	8.62	25.73	29.74	29.67	3.26	4.65	3.81	27.34	8.63	27.57	6.81
YBL025W	5.37	2.52	5.03	1.55	10.06	8.63	7.86	7.48	10.89	9.38	7.41	8.91	2.53	0.18	3.08	0.14	6.46	5.09	5.23	0.62	0.99	1.04	6.23	5.67	4.85	6.22	12.62	31.43	32.07	1.27	1.34	1.36	7.55	7.1	8.28	0.36	0.96	0.62	7.85	0.39	9.66	0.79
YBL026W	7.22	3.43	5.95	3.04	9.64	7.83	6.23	8.56	9.83	9.46	9.35	8.83	2.71	0.58	3.56	0.36	9.98	5.52	4.43	1.46	1.96	1.68	9.54	9.7	7.51	10.88	15.94	24.04	23.81	0.75	0.76	0.65	5.54	5.96	6.08	0.2	0.31	0.29	6.34	0.39	7.29	1.52
YBL027W	35.99	27.4	31.6	22.24	30	24.56	24.27	25.26	32.51	25.7	24.36	23.47	23.83	14	17.05	8.28	26.29	18.5	23.27	14.52	16.3	18.57	46.31	47.23	32.61	44.57	156.58	104.27	107.98	8.18	6.75	7.06	34.32	32.93	36.58	3.7	3.28	3.39	39.05	20.12	39.3	16.09
YBL028C	13.54	8.31	13.75	7.86	23.28	25.41	20.03	21.1	31.4	33.56	29.09	30.41	4.53	0.74	9.08	3.65	20.05	15.75	13.33	7.45	8.51	8.56	24.97	21.29	26.12	32.74	22.77	45.66	43.7	0.65	0.92	0.9	15.25	17.94	17.07	0.46	0.61	0.39	14.79	1.6	11.9	1.63
YBL029C-A	2.15	1.75	2.93	1.89	7.37	7.85	6.06	6.68	6.58	7.22	7.47	6.87	2.88	2.14	2.02	0.71	8.15	5.7	4.79	3.49	3.48	3.71	4.84	4.92	2.79	4.69	7.95	17.53	16.74	0.31	0.23	0.25	2.69	3.56	3.28	0.09	0.06	0.04	4.83	0.74	5.83	2.95
YBL029W	1.31	1.08	2.11	1.27	5.4	3.8	3.36	3.38	5.09	6.21	3.35	2.77	2.18	2.07	0.77	0.24	1.49	1.3	1.5	0.5	0.62	0.73	1.96	2.38	1.3	1.35	10.53	21.06	21.92	1.72	1.67	0.98	1.92	2.28	2.82	0.21	0.17	0.13	4.78	1.06	5.95	3.59
YBL030C	23.09	35.62	22.82	27.24	45.06	42.45	47.46	41.17	24.67	36.62	32.17	36.4	29.62	42.01	16.57	13.31	57.95	46.62	43.85	62.59	64.98	79.5	24.18	27.19	15.09	24.92	93.28	100.25	111.41	5.22	5.48	4.94	15.96	15.61	19.08	1.28	2.08	1.02	30.87	12.61	36.02	31.87
YBL031W	7.05	3.1	6.81	3.2	19.12	19.36	17.89	15.06	16.91	17.77	14.28	15.54	3.97	0.29	4.3	0.12	12.72	11.91	9.43	1.2	1.2	1.01	8.79	8.51	6.47	7.61	23.59	61.34	61.41	1.13	0.98	0.87	9.04	10.22	11.58	0.33	0.9	0.52	12.01	0.99	13.54	2.33
YBL032W	15.07	10.76	14.52	9.2	37.45	33.32	32.3	29.16	38.08	38.94	31.59	32.99	13.16	2.53	10.28	1.54	27.43	25.86	21.54	6.39	6.16	7.4	18.88	17.53	12.54	16.95	80.92	126.7	143.2	2.06	1.56	1.6	21.67	25.87	28.43	0.48	1.62	0.62	28.17	8.91	28.48	8.71
YBL033C	127.61	167.65	136.51	153.51	196.98	176.25	168.54	176.72	207.18	221.42	210.5	195.02	32.71	46.81	111.11	72.73	233.11	163.69	150.29	226.3	202.84	249.82	187.9	170.42	144.94	231.31	159.94	351.49	406.7	7.64	7.37	8.12	140.85	139.8	162.3	2.38	4.02	2.11	135.58	91.63	173.25	117.59
YBL034C	14.2	11.31	17.79	10.29	51.44	41.17	47.09	37.03	37.98	40.14	29.51	36.88	10.32	1.98	8.73	0.94	28.16	30.67	32	5.48	6.07	4.94	16.31	13.49	13.66	15.25	61.4	147.28	155.94	6.2	4.9	5.34	21.53	21.43	24.36	1.59	3.63	1.76	25.15	8.59	26.28	12.28
YBL035C	9.45	6.05	10.78	5.36	39.45	32.04	33.84	31.82	25.6	28.1	21.95	24.21	7.18	3.51	5.56	1.36	17.63	18.84	17.24	5.66	7.72	7.36	15.62	13.01	12.09	14.62	36.99	82.33	93.34	2.52	2.35	2.46	15.59	12.78	18.75	0.6	1.48	0.64	17.49	5.28	18.41	6.11
YBL036C	44.12	31.97	42.43	26.04	58.07	54.78	49.17	45.92	60.08	72.1	55.41	66.36	16.45	6.69	28.46	4.96	45.96	41.74	32.19	11.1	11.68	12.19	41.81	38.11	29.89	47.18	92.76	177.51	191.17	9.28	9.05	8	36.9	40.49	45.28	3.13	4.21	3.23	44.96	8.5	48.12	10.23
YBL037W	13.59	7.73	14.56	6.5	42.35	34.42	35.92	32.17	35.13	40.91	29.47	35.66	8.19	0.6	8.5	0.36	27.88	30.49	30.01	3.21	3.21	3.34	15.26	14.15	10.42	14.35	53.08	125.74	127.51	5.52	4.67	4.58	16.78	15.85	21.04	1.17	1.63	1.4	24.99	2.32	27.01	3.01
YBL038W	11.59	7.73	10.46	5.93	12.77	11.96	10.35	10.84	16.1	12.94	12.45	12.64	5.38	0.67	6.87	0.53	12.4	8.61	8.94	3	2.87	2.98	14.4	14.57	11.65	15.76	32.66	67.05	68.41	3.23	2.95	2.94	13.55	14.68	15.96	1.16	1.1	1.08	16.62	1.64	19.34	2.35
YBL039C	16.5	9.53	18.19	9.44	43.46	32.04	34.04	28.88	38.43	35.72	30.83	30.55	8.07	2.71	7.63	1.71	22.35	18.97	21.75	4.67	6.14	5.5	25.14	14.15	25.54	26.3	42.33	87.63	81.86	3.5	3.62	3.88	12.9	17.4	17.4	1.43	1.96	1.39	16.97	4.31	13.12	2.01
YBL039W-B	0.7	0.48	0.76	0.31	0.71	0.65	0.61	0.46	0.78	0.61	0.65	0.56	0.34	0.03	0.37	0.04	0.7	0.66	0.33	0.1	0.18	0.11	0.53	0.64	0.46	1.05	2.24	4.98	3.43	0.11	0.13	0.06	0.56	0.7	0.87	0.01	0.06	0.02	1.27	0.07	1.26	0.21
YBL040C	10.73	7.8	10.61	7.62	13.41	10.91	11.66	9.83	14.89	14.28	10.73	13.44	6.57	1.72	5.38	0.94	12.14	9.68	9.97	3.89	3.87	3.97	10.25	10.08	8.54	11.02	36.95	65.44	62.88	3.85	3.83	3.17	11	12.73	14.04	1.08	1.79	1.15	15.44	3.51	16.22	3.93
YBL041W	29.54	20.37	28.07	16.51	33.98	31.64	26.67	27.23	38.43	38.36	33.39	33.45	16.03	7.78	18.59	4.16	34.26	28.49	21.91	13.81	13.99	13.46	36.07	36.99	21.62	30.87	71.18	121.32	111.34	4.39	4.97	4.51	25.41	27.39	29	1.56	2.11	1.23	32.19	6.08	35.44	10.57
YBL042C	2.03	1.36	2.06	1.61	12.27	10.08	11.66	10.31	9.35	9.35	8.21	10.35	1.63	1.19	0.97	0.65	4.96	6.27	5.89	3.13	3.61	4.27	2.51	1.78	3.28	2.77	17.28	40.28	40.82	1.65	1.38	1.47	6.07	5.95	6.72	0.13	0.17	0.13	8.01	3.51	7.54	3.32
YBL045C	22.92	32.58	24.14	24.7	50.49	50.7	50.39	47.99	43.57	48.13	36.25	48.27	26	38.36	13.6	11.97	53.96	49.21	52.48	58.25	50.06	65.22	25.08	31.55	16.9	28	63.16	130.48	147.12	5.4	5.3	4.88	14.79	14.68	18.69	0.52	0.99	0.54	27.45	17.14	33.14	40
YBL046W	23.09	19.65	26.81	15.84	51.81	36.55	41.55	36.67	44.53	45.25	34.44	36.88	12.16	2.92	14.36	1.88	32.41	29.74	30.31	6.52	6.28	7.64	27.39	23.57	23.71	27.52	66.33	177.43	183.67	7.59	7.53	7.29	26.11	25.52	35.71	1.44	3.47	1.54	34.49	17.27	38.49	12.9
YBL047C	70.65	52.9	87.88	49.28	254.92	206.3	226.64	205.83	211.49	240.17	173.02	209.38	74.11	20.02	47.22	6.22	187.22	190.27	194.14	45.74	44.47	51.08	100.11	98.52	67.99	84.33	372.78	687.06	806.4	44.89	44.12	42.07	114.05	119.41	147.93	17.76	26.09	19.33	160.87	38.26	169.01	61.08
YBL050W	15.58	12.34	18.58	11.23	14.85	12.08	12.18	10.81	16.94	14.12	13.09	13.33	10.39	1.77	10.02	1.22	12.42	10.82	12.18	3.5	3.45	3.97	17.98	14.97	13.56	16.48	56.81	95.99	95.44	6.25	6.63	5.61	22.1	24.04	27.42	2.29	2.91	2.54	27.9	5.09	30.14	4.87
YBL051C	86.28	80.72	91.26	67.03	301.86	253.57	251.75	226.22	245.56	306.89	233.96	273.3	58.7	23.3	55.93	10.19	207.46	217.88	184.6	65.88	63.92	69.21	99.15	88.05	82.04	101.23	336.27	772.6	838.33	52.43	52.75	54.33	123.05	137.74	153.41	26.4	38.43	26.86	137.82	21.85	148	45.07
YBL052C	18	11.54	19.73	9.21	47.38	35.27	39.23	30.03	40.55	44.85	33.15	39.43	12.22	1.22	10.58	0.61	28.12	27.15	30.57	3.13	3.45	4.31	22.24	20.24	20.43	24.64	76.52	159.42	164.14	5.76	5.71	5.16	22.86	26.81	30.46	1.2	3.1	1.22	34.89	6.25	36.55	7.14
YBL054W	24.55	15.14	20.98	12.71	123.5	93.78	88.52	79.62	95.59	111.34	95.9	107.34	7.69	2.93	11.28	3.05	54.68	53.49	48.42	11.98	13.61	14.58	26.67	15.45	33.27	35.55	32.74	83.29	78.64	7.17	6.87	6.91	15.77	19.85	17.98	2.47	3.19	2.92	18.03	3.18	14.6	2.73
YBL055C	4.6	1.99	4.36	1.68	12.12	7.98	8.76	8.47	11.01	10.81	7.96	9.31	1.66	0.2	2.25	0.12	6.91	6.48	6.4	0.54	0.66	0.67	4.53	3.36	4.24	4.8	13.89	27.09	27.1	0.31	0.23	0.28	3.65	4.98	4.8	0.05	0.11	0.09	4.59	0.26	3.61	0.33
YBL056W	16.76	11.14	17.48	9.81	34.45	26.39	30.82	26.84	35.69	33.72	27.06	33.18	12.31	1.65	9.32	0.77	24.31	22.68	27.73	4.61	4.8	5.24	21.88	19.89	18.54	23.35	68.23	132.89	145.51	5.75	5.52	4.72	20.09	21.87	25.4	2.17	4.02	2.68	29.44	9.3	28.48	8.19
YBL057C	8.85	4.39	8.04	3.52	10.35	8.43	8.03	7.71	13.38	11.64	10.69	9.45	3.84	0.37	4.66	0.13	8.91	6.68	5.89	1.15	1.1	0.97	8.69	6.88	6.76	8.57	19.71	29.26	33.68	1.2	1.14	0.96	7.16	7.77	8.12	0.28	0.48	0.38	8.5	1.52	8.37	1.14
YBL058W	24.79	18.88	31.43	16.43	39.59	28.74	30.53	27.53	42.31	37.82	29	29.56	20.97	3.96	14.83	2.01	33.07	24.63	32.07	8.58	8.49	9.47	29.84	27.41	22.55	26.85	96.3	184.75	184.79	8.73	8.54	8	36.51	41.21	48.53	3.78	5.03	3.23	53.76	18.61	53.72	12.64
YBL059C-A	3.07	1.47	3.66	1.06	2.9	2.23	2.96	2.55	2.57	2.88	2.52	2.05	2.38	0.05	1.65	0.06	3.15	2.04	1.71	0.21	0.32	0.26	3.31	3.23	3.46	3.84	8.7	13.1	12.81	0.16	0.21	0.22	3.81	3.75	4.56	0.02	0.09	0.07	4.56	0.5	5.7	0.59
YBL059W	6.75	2.56	5.78	2.58	10.9	10.06	8.44	8.36	11.74	12.17	9.84	10.8	3.12	0.09	4.39	0.09	9.68	7.66	4.9	0.78	0.65	1.06	8.87	8.23	5.29	7.4	15.49	28.46	33.54	0.8	0.62	0.65	7.61	9.07	10.21	0.21	0.2	0.13	12.22	0.17	14.45	0.84
YBL060W	7.93	5.86	9.35	4.67	31.34	25.89	26.18	21.19	23.26	24.05	18.09	20.75	3.66	0.5	4.81	0.51	17.84	17.61	20.93	3.07	3.65	4.01	8.92	7.73	9.99	12.32	28.07	64.32	69.95	3.38	3.6	3.16	10.95	9.38	12.25	0.77	1.38	0.69	12.87	3.74	12.74	4.06
YBL061C	31.58	21.38	34.9	19.18	72.06	58.28	62.25	53.86	69.13	73.86	53.9	65.54	15.28	5.79	17.19	4.37	40.17	43.76	39.98	11.31	14.73	13.91	48.14	46.52	40.48	54.24	127.36	289.34	296.97	15.55	13.1	14.28	42.24	41.74	49.11	2.44	3.05	2.06	51.65	19.67	52.13	17.45
YBL063W	10.34	5.67	11.81	4.89	26.57	22.04	25.86	21.49	22.1	20.88	16.24	20.6	6.97	0.45	6.33	0.32	15.87	15.59	15.09	1.43	2.3	2.16	11.58	11.86	8.88	11.39	48.94	109.58	105.67	1.54	1.56	1.65	14.24	12.92	17.54	0.39	1.03	0.33	18.86	2.29	24.64	3.68
YBL064C	10.48	14.88	9.59	11.73	4.19	4.08	4.7	4.52	4.76	5.41	4.44	4.5	3.45	5.17	6.14	6.7	7.49	5.11	5.98	10.82	9.94	11.15	10.78	19.73	7.48	15.5	19.86	30.95	29.41	1.68	1.51	1.22	6.22	7.52	7.07	0.53	0.59	0.64	14.28	6.51	13.47	9.58
YBL066C	25.49	20.99	32.25	19.01	98.71	78.47	85.59	78.38	80.14	85.66	62.35	79.29	13.77	5.89	14.89	2.87	64.36	66.07	67.87	16.32	17.14	19.26	30.54	26.41	26.18	31.37	67.23	176.47	196.77	15.71	14.72	16.18	24.3	23.66	29.89	4.15	5.51	4.48	23.83	5.3	29.64	8.6
YBL067C	9.28	5.24	11.58	5.05	26.92	19.41	24.27	18.3	24.47	21.68	16.62	20.62	5.98	0.91	4.05	0.34	15.78	15.59	19.61	1.51	1.92	2.22	10.51	8.74	10.11	11.54	39.75	81.84	82.07	3.87	3.85	3.59	10.76	11.24	13.71	1.1	1.4	1.12	14.17	3.72	13.57	3.65
YBL068W	9.54	4.51	8.5	3.48	16.07	16.71	16.56	12.49	17.14	16.99	13.01	17.3	3.56	0.31	3.89	0.36	9.87	10.84	8.47	1.3	1.38	1.79	11.2	9.01	8.88	10.18	20.64	44.14	44.96	2.32	2.1	2.02	9.6	9.68	10.37	0.56	0.83	0.87	10.58	1.39	9.86	1.29
YBL069W	4.94	2.71	7.1	3.82	13.54	11.03	10.23	9.78	12.42	10.92	9.5	10.43	5.04	3.32	2.73	0.76	8.04	6.7	7.7	4.43	4.47	5.29	8.55	6.56	5.81	6.25	21.84	44.14	44.4	0.86	0.69	0.75	6.12	7.8	9.15	0.18	0.38	0.34	9.58	1.88	10.67	1.19
YBL071C-B	0.09	0.15	0.09	0.07	0.21	0.08	0.12	0.21	0.2	0.19	0.16	0.19	0.11	0.1	0.09	0.05	0.23	0.09	0.14	0.24	0.17	0.32	0.16	0.14	0.1	0.28	0.11	0.16	0.35	0.02	0.1	0.06	0.07	0.02	0.06	0.02	0.01	0.01	0.11	0.2	0.08	0.52
YBL071W-A	6.18	4.32	5.11	3.15	25.63	24.36	16.99	20	26.64	27.33	24.29	22.35	2.2	1	3.55	0.99	18.8	15.43	11.57	8.44	7.82	8.89	6.88	6.43	5.79	7.98	10.9	18.01	16.46	0.92	0.55	0.97	5.37	5.58	6.22	0.25	0.28	0.29	6.56	1.8	6.51	1.92
YBL072C	27.07	24.12	24.48	20.13	33.84	26.02	24.04	27.53	29.28	27.62	25.79	26.77	17.6	13.06	18.85	8.03	28.77	22.18	18.84	16.29	15.89	19.52	40.67	37.25	23	32.86	161.33	129.68	141.73	12.24	11.11	11.22	30.41	29.2	34.25	4.96	5.5	5.09	38.73	7.96	39.88	15.85
YBL074C	2.94	2.45	3.24	1.72	10.88	8.83	9.68	7.32	8.49	8.5	5.73	7.66	1.82	0.32	1.68	0.18	6.27	6.34	6.5	1.23	1.34	1.4	2.94	1.92	2.8	2.9	16.57	36.5	45.73	1.89	1.93	1.43	4.06	3.51	4.76	0.38	0.62	0.45	5.59	1.12	5.98	1.06
YBL075C	6.69	4.92	8.69	4.93	22.52	15.36	18.01	15.06	17.74	17.79	11.64	13.38	5.95	1.09	3.95	0.47	12.55	13.66	16.63	2.29	2.51	2.78	8	6.22	6.5	7.25	32.92	78.71	84.03	5.46	4.95	4.64	9.13	8.31	11.69	1.17	1.66	1.1	13.76	2.4	16.22	2.51
YBL076C	44.52	31.32	45.91	27.92	111.33	83.05	101.83	90.83	94.71	101.45	87.04	105.96	27.72	15.85	27.41	10.21	67.95	68.85	65.08	32.83	35.34	40.41	61.89	59.37	56.48	65.86	193.13	257.67	260.35	20.35	18.4	18.79	41.28	47.26	50.33	9.36	7.82	9.6	50.28	24.64	48.1	19.83
YBL078C	8.57	7.64	9.77	5.84	7.16	7.38	6.73	6.8	8.74	9.22	6.89	7.69	6.75	2.23	7.06	1.41	12.42	9	8.26	4.19	3.76	4.57	11.01	13.49	4.74	8.22	35.16	63.03	73.11	2.61	2.48	2.28	12.85	13.14	16.3	0.56	0.63	0.55	22.4	2.45	26.26	7.57
YBL079W	69.33	52.2	75.3	42.39	191.11	149.46	161.18	142.83	158.14	173.85	135.05	167.93	38.25	13.39	40.52	7.07	125.2	129.88	120.52	29.78	34.16	38.98	86.46	71.97	75.71	82.7	211.34	474.41	495.63	27.55	25.84	25.57	70.53	76.32	90	11.7	17.72	12.61	87	19.54	85.73	25
YBL080C	4.75	2.68	6.54	2.68	13.2	12.36	11.39	11	12.12	12.6	8.81	9.58	3.24	0.12	2.95	0.07	8.59	7.95	7.74	0.54	0.76	0.76	5.35	5.17	4.36	5.37	30.87	67.69	74.51	1.25	0.96	0.93	7.17	7.4	9.42	0.3	0.54	0.45	13.52	1.15	15.64	1.57
YBL081W	63.34	46.39	64.57	36.52	308.7	258.95	227.31	236.07	254.33	316.67	251.97	292.32	28.15	6.42	40.96	4.12	175.24	176.41	137.06	30.04	29.47	30.96	97.16	86.83	86.98	109.5	151.43	426.42	472.52	18.37	16.96	19.55	74.73	71.15	86.3	10.18	14.23	11.85	63.17	4.67	78.31	16.53
YBL082C	1.38	0.74	1.17	0.54	2.42	2.93	2.73	1.97	2.17	2.72	2.07	1.78	0.64	0.03	0.68	0.02	1.76	1.61	1.48	0.11	0.1	0.28	1.09	0.94	1.11	1.14	4.93	6.83	7.98	0.22	0.33	0.29	1.12	1.02	1.24	0.04	0.11	0.06	1.4	0.71	1.84	0.19
YBL084C	9.58	9.1	11.52	8.23	31.66	23.26	24.91	23.58	25.91	29.78	21.21	25.7	4.53	1.34	5.26	0.84	19.21	16.86	18.68	4.79	5.27	5.57	10.99	10.27	8.18	10.33	30.76	80.72	77.94	8.37	7.02	6.54	10.13	10.17	12.62	2.5	3.41	2.49	11.63	2.45	14.4	7.41
YBL085W	46.91	37.59	53.41	30.31	156.97	125.07	144.74	114.32	119.88	139.52	101.59	128.97	30.53	12.4	30.46	6.67	84.3	92.57	93.21	28.04	28.1	33.09	68.45	67.22	49.4	70.31	179.24	441.29	467.97	13.52	13.29	12.04	59.23	57.64	72.97	3.77	6.74	4.15	77.29	29.62	80.61	42.84
YBL086C	9.45	6.63	13.68	6.38	20.99	19.96	19.74	19.31	20.67	22.43	16.4	16.95	10.16	2.32	7.24	0.92	14.91	13.02	14.71	2.95	3.3	3.28	15.65	20.37	8.32	11.05	59.16	126.46	137.81	6.27	5.94	5.33	19.34	20.13	25.07	1.36	1.55	1.43	26.61	3.63	29.43	5.43
YBL087C	6.99	5.13	6.32	3.95	10.61	11.68	8.7	10.26	7.66	8.36	8.77	8.86	4.77	2.45	3.44	1.28	9.53	8.54	5.51	5.37	6.68	6.32	9.46	9.72	7.25	8.82	25.49	24.2	24.09	1.77	1.48	1.54	5.66	6.31	7.68	0.75	0.83	0.68	7.45	3.05	7.26	2.78
YBL088C	13.08	6.69	15.24	5.99	40.96	35.42	35.78	31.66	32.86	33.75	24.72	31.05	8.68	0.58	7.48	0.35	24.84	27.33	31.25	2.64	2.28	2.72	17.02	15.62	15.03	16.37	54.46	114.08	117.08	4.71	4.62	4.61	16.67	15.61	20.84	0.52	1	1.01	20.86	3.72	23.71	4.49
YBL089W	3.53	1.68	4.6	1.93	9.53	8.4	7.74	7.69	10.66	9.46	8.3	8.97	2.27	0.08	1.95	0.06	5.79	5.27	6.01	0.89	0.92	0.67	4.18	3.09	3.03	4.19	10.34	27.01	25.7	1	0.87	0.87	4.39	4.45	6.32	0.18	0.26	0.16	6.67	0.74	8.32	1.51
YBL090W	8.83	4.79	8.18	4.45	10.51	8.98	8.76	8.63	11.77	10.44	8.7	9.53	4.35	0.45	5.43	0.47	10.4	7.88	5.56	1.35	1.48	1.7	11.04	12.9	10.75	13.43	19.04	41.48	39.7	1.24	0.92	0.87	9.81	10.75	12.05	0.47	0.51	0.44	12.66	1.17	12.99	2.43
YBL091C	16.55	9.76	17.43	8.94	37.03	27.27	29.72	26.43	35.79	35.77	25.9	26.77	12.01	1.28	9.34	0.74	27.77	22.38	22.12	3.41	3.76	3.49	20.77	17.79	15.17	19.33	102.65	129.6	148.59	6.59	6.04	6.58	24.3	26.25	31.55	2.53	3.09	2.59	30.52	6.45	30.57	6.54
YBL091C-A	1.03	0.39	0.86	0.37	0.87	1.03	0.9	1.13	1.44	1.36	1.09	1.12	0.63	0.04	0.65	0.07	1.3	0.7	0.94	0.13	0.1	0.09	0.76	1.05	0.79	0.78	4.55	6.83	6.72	0.22	0.19	0.15	1.27	1.77	1.7	0.02	0.03	0.07	2.24	0.07	2.6	0.17
YBL092W	26.93	21.12	25.06	18.14	30	28.27	29.02	26.79	29.71	25.44	23.74	26.56	19.15	12.32	15.06	7.28	23.93	21.09	18.7	14.12	16.79	17.69	38.66	40.79	27.54	39.44	137.14	102.34	96.63	10.93	9.79	9.95	22.95	23.94	27.22	3.35	2.95	2.98	30.25	15.08	28.6	12.77
YBL093C	17.12	9.35	17.23	8.07	26.02	25.29	21.66	22.39	34.88	29.96	26.46	27.38	9.75	3.93	9.73	1.63	23.31	19.2	14.57	12.71	13.71	14.52	20.32	17.76	16.24	16.51	38.15	79.67	77.73	2.42	2.69	2.19	17.88	19.9	23.31	0.84	1.03	0.8	25.07	2.64	25.07	3.9
YBL095W	5.59	3.73	5.61	3.23	8.14	8.2	7.31	5.97	6.85	7.51	6.74	6.81	3.25	1.11	3.67	0.69	6.89	5.75	5.18	2.26	2.03	2.65	6.01	5.92	5.6	6.76	14.15	31.19	32.49	0.89	1.04	1	7.72	7.28	8.61	0.28	0.51	0.35	8.99	1.64	10.34	1.9
YBL097W	28.38	16.78	29.86	14.23	75.75	62.51	68.74	57.84	60.13	65.98	50.21	61.23	15.82	1.17	20.9	0.88	46.6	49.42	47.56	4.64	5.49	5.03	32.39	28.62	29.54	35.24	116.53	315.15	317.35	7.47	6.94	6.35	43.7	39.39	55.8	1.7	4.17	1.81	55.48	6.6	62.5	8.71
YBL098W	1.01	0.74	0.84	0.76	2.19	1.78	1.28	1.47	1.66	1.73	1.56	1.33	0.82	1.08	0.44	0.33	1.76	1.34	1.22	0.94	0.9	1.1	0.72	0.78	0.27	0.73	4.52	7.56	6.3	0.59	0.47	0.5	0.56	0.46	0.59	0.23	0.07	0.2	1.13	0.67	1.77	0.51
YBL099W	14.35	17.75	15.95	14.31	28.66	23.61	25.17	23.72	24.14	25.3	17.96	24.21	17.99	21.87	7.92	5.49	26.67	23.99	26.42	23.2	23.83	26.15	17.87	19.78	13.69	18.3	69.8	85.7	98.03	5.34	5.38	4.93	13.04	14.4	15.68	1.45	1.71	1.68	21.91	23.46	26.43	30.81
YBL101C	13.86	7.46	18.31	7.62	57.73	50.5	50.16	46.03	45.19	50.18	34.47	44.12	14.57	5.06	10.83	1.65	43.32	42.53	41.17	14.56	13.28	18.47	21.87	24	14.13	19.06	85.29	184.75	212.03	2.4	2.03	2.35	24.02	20.85	31.41	0.28	0.78	0.42	38.02	11.06	43.68	18.42
YBL102W	5.95	3.26	6.09	2.05	7.35	5.08	5.51	5.95	7.96	7.11	6.83	6.97	4.42	0.46	3.7	0.25	6.95	5.07	4.04	0.84	1.17	1.21	5.86	6.4	5.8	8.36	18.33	32.64	32.21	1.42	1.38	1.12	6.15	6.09	7.8	0.41	0.44	0.32	8.77	0.59	9.38	1.46
YBL103C	19.95	16.91	22.93	14.49	61.87	50.95	56.25	55.36	62.15	66.06	58.16	70.14	10.04	3.72	13.84	3.12	33.07	35.65	35.5	11.12	13.48	14.76	26.19	25.42	26.5	35.25	71	164.33	183.74	13.68	13.52	13.86	27.45	25.32	32.46	4.49	5.94	5.2	29.44	8.87	32.18	11.04
YBL104C	10.03	5.97	12.62	4.86	32.29	24.71	27.98	21.51	31.12	28.55	22.2	26.13	7.06	0.25	4.77	0.16	18.2	19.02	22.19	1.7	1.82	1.88	9.64	6.77	8.22	8.88	56.59	118.34	119.74	4.05	3.71	4.04	15.13	15.45	18.81	0.84	1.49	0.85	18.78	4.65	19.12	3.76
YBL105C	53.56	46.03	61.82	40.75	135.24	101.48	117.19	96.94	126.21	128.92	95.77	119.71	37.58	9.55	33.82	4.79	84.82	87.18	98.51	17.83	19.99	22.2	66.39	58.51	54.73	64.11	220.56	511.64	584.98	30.34	28.46	27.68	78.13	76.53	95.69	11.77	19.5	12.71	96.58	32.57	109.94	42.49
YBL106C	3.75	7.86	5.52	6.3	8.38	6.23	6.09	5.99	9.3	8.66	5.84	7	4.89	2.98	2.52	0.98	7.66	7.2	10.02	4.72	4.62	5.48	4.96	4.28	3.25	3.98	41.99	92.86	100.62	11.42	10.6	10.3	8.19	9.07	12.8	5.43	7.83	5.35	14.38	7.16	14.98	8.04
YBL107C	9.41	4.9	9.28	3.79	14.35	14.58	13.08	11.3	17.79	16.01	14.61	14.77	4.54	1.28	6.13	0.87	10.21	8.61	6.59	2.42	2.56	2.87	11.54	12.6	7.1	11.66	35.12	64.8	62.53	2.16	1.65	1.93	9.53	9.82	12.52	0.83	0.62	0.99	21.4	0.97	25.5	2.78
YBL113C	0.76	0.43	0.82	0.25	4.4	3.18	3.36	3.03	3.28	3.06	1.67	1.86	0.75	0.2	0.46	0.04	1.45	1.2	1.83	0.39	0.24	0.24	0.79	0.75	0.72	0.75	7.28	13.59	15.55	0.38	0.51	0.42	1.1	0.7	1.01	0.02	0.05	0.01	2.97	0.46	3.3	0.63
YBR001C	19.6	25.05	21.28	20.01	39.4	35.52	37.29	35.22	31.96	32.92	25.39	33.21	16.39	21.04	15.35	11.57	42.68	37.24	44.86	37.09	35.58	42.74	21.77	26.48	17.56	26.54	56.62	116.98	135.43	3.5	3.3	2.95	19.31	16.71	22.08	0.94	1.58	0.79	29.44	22.63	33.62	25.48
YBR002C	37.41	26.89	40.19	24.68	55.47	52.66	47.2	44.27	64.89	69.57	55.97	62.64	18.28	2.81	24.22	2.42	41.56	36.88	32.02	6.62	8.59	8.74	50.15	52.97	41.12	56.39	70.77	177.19	178.77	6.89	6.08	6.01	42.66	42.25	55.25	4.46	4.82	4.45	43.2	12.2	53.5	14.85
YBR003W	7.25	5.13	8.43	5.45	20.2	14.68	16.53	14.17	19	18.59	14.75	15.11	6.15	1.1	5.17	0.64	14.7	12.63	14.66	4.58	4.37	5.29	10.51	10.15	7.46	9	31.73	63.11	71.98	2.68	3.08	2.71	10.54	10.87	12.7	0.83	1.02	0.7	14.73	4.07	15.79	4.51
YBR004C	1.92	1.05	2.55	1.44	4.64	4.3	3.45	3.65	4.61	4.02	3.19	3.96	1.23	0.64	0.89	0.22	3.06	2.68	2.84	1.22	1.14	1.27	2.75	2.31	1.78	2.41	8.25	13.27	14.35	0.66	0.51	0.48	2.57	3.02	3.02	0.13	0.12	0.08	3.05	0.32	2.93	0.65
YBR005W	3.16	1.84	3.7	2.14	4.45	4.3	3.1	3.65	4.71	5.25	4.1	3.78	3.97	2.78	1.4	0.48	4.68	3.73	3.87	2.86	2.66	2.76	4.85	3.54	3.16	3.06	9.85	19.94	17.72	1.16	0.78	0.85	4.83	4.93	5.39	0.18	0.18	0.19	5.02	0.78	5.85	0.82
YBR006W	1.16	0.7	1.48	0.89	3.45	2.48	2.81	2.53	2.17	2.56	1.99	2.18	2.06	1.58	1.04	0.35	4.53	3.84	4.04	2.84	2.03	3.21	1.83	1.6	1.13	1.42	13.96	27.58	30.6	0.56	0.52	0.37	3.5	3.95	5.29	0.14	0.14	0.13	6.75	1.95	7.09	2.41
YBR007C	14.31	13.83	16.03	10.07	63.26	57.56	60.86	52	50.2	59.08	42.09	55	9.34	6.71	8.94	6.25	41.49	38.26	40.82	20.14	20.06	24.68	22.43	21.26	18.33	20.77	68.23	165.45	175.97	8.38	8.09	7.96	23.28	23.45	32.08	6.65	7.16	8.7	32.3	10.52	35.34	21.02
YBR008C	450.64	598.81	477.13	555.41	885.63	766.38	803.67	726.65	619.73	769.31	861.46	1089.37	9.92	10.79	363.24	285.79	1212.27	1196.36	1046.64	983.26	1070.19	1246.08	557.17	526.08	414.53	593.26	371.03	766.81	758.15	9.38	8.23	8.64	258.07	359.49	356.22	27.06	61.41	29.54	106.54	57.34	100.96	65.49
YBR009C	64.11	65.53	55.06	57.35	70.98	69.79	62.89	64.03	75.33	68.56	71.32	69.32	64.61	89.48	45.31	38	61.21	49.03	36.88	74.3	73.57	75.14	84.37	90.35	50.47	80.64	177.86	293.85	279.4	4.21	3.35	3.37	51.26	60.03	68.41	18.6	23.17	22	95.99	30.03	104.44	54.88
YBR010W	28.9	32.25	28.12	28.13	71.37	56.13	51.35	51.75	47.45	56.6	55.48	50.02	29.99	36.54	24.57	17.76	56.27	34.83	31.09	55.04	47.46	56.91	36.23	40.4	20.02	33.14	101.19	184.75	191.24	2.18	1.71	1.98	33.24	36.95	41.34	5.65	8.22	6.45	56.99	12.42	63.33	33.16
YBR011C	48.44	43.39	45.54	35.38	98.24	88.1	85.36	78.41	95.72	104.81	79.75	92.86	26.66	21.66	32.63	16.66	81.67	76.37	71.91	55.27	51.22	55.42	76.51	72.15	51.52	69.16	303.05	257.02	266.79	37.82	35.95	34.89	64.11	65.92	69.79	14	14.79	14.88	62.31	32.98	68.07	39.5
YBR013C	0.47	0.15	0.42	0.2	1	1	0.55	0.71	0.88	0.96	0.78	1.01	0.35	0.02	0.22	0.04	0.81	0.64	0.7	0.05	0.08	0.13	0.8	0.3	0.43	0.4	3.62	3.94	4.83	0.09	0.15	0.03	0.39	0.7	0.91	0.03	0.04	0.02	1.16	0.04	1.54	0.19
YBR014C	7.34	3.35	8.81	2.85	11.8	9.71	10.03	8.79	11.52	9.72	8.1	8.65	5.64	0.89	4.53	0.42	11.46	7.98	9.22	2.06	2.34	2.11	10.8	11.82	8.57	12.33	29.64	49.2	46.29	0.97	1.09	1.02	11.51	12.87	14.56	0.35	0.38	0.16	17.08	1.71	20.1	2.57
YBR015C	15.47	9.06	18.34	8.75	38.82	31.24	32.91	29.23	35.74	37.13	29.54	29.78	12.14	1.18	9.59	0.58	26.2	24.06	24.47	3.72	4.25	3.43	22.12	19.3	14.96	18.48	61.18	112.31	116.38	3.56	2.77	2.76	18.39	19.96	23.82	1.07	1.53	1.12	22.86	5.73	24.19	4.98
YBR016W	37.18	29.36	30.9	24.11	55.41	52.68	40.5	44.13	67.14	71.12	58.65	56.84	28.73	20.82	31.96	11.43	65.74	41.72	33.46	44.9	35.93	46.77	53.47	49.07	30.08	44.82	106.42	200.35	219.25	4.17	4.43	4.44	60.05	67.5	69.06	1.58	2.99	1.26	68.28	4.2	77.53	17.42
YBR017C	30.23	23.89	34.84	20.87	58.89	44.08	48.01	42.45	63.13	59.37	44.82	55.69	19.12	5.05	15.48	2.39	37.88	39.85	43.24	8.91	9.8	10.68	36.71	29.51	27.45	32.55	102.76	194.07	208.39	14.23	14.36	12.82	29.69	33.2	37.16	4.73	6.28	5.55	34.68	11.55	37.66	8.9
YBR020W	0.75	0.47	0.76	0.43	2.82	2.43	2.64	2.2	3.45	2.85	2.05	2.08	0.48	0.03	0.43	0.02	1.59	1.68	2.6	0.18	0.17	0.32	0.34	0.53	0.2	0.34	1.31	2.41	3.92	0.49	0.44	0.57	0.83	0.67	1.01	0.12	0.23	0.12	1.05	0.82	1.44	0.78
YBR022W	2.23	0.88	2.17	0.58	3.37	3.13	2.35	2.25	2.9	2.69	3.08	2.5	1.13	0.06	1.12	0.02	2.66	1.93	2.37	0.18	0.17	0.22	1.98	2.08	1.44	1.69	7.76	15.19	16.6	0.13	0.24	0.17	2.38	2.61	3.02	0.08	0.04	0.08	5.34	0.09	5.52	0.38
YBR023C	14.78	10.45	19.12	10.59	45.72	35.5	44.27	33.84	46.87	42.11	32.66	38.82	11.59	3.16	8.24	1.32	26.1	28.06	29.91	6.2	7.11	6.56	22.88	20.69	19.21	22.08	77.34	160.15	162.39	7.01	6.63	6.59	18.29	18.34	22.6	2.1	2.16	2.48	24.8	18.24	25.85	12.26
YBR024W	3.82	1.59	3.97	1.44	6.19	6.15	4.64	4.98	6.5	6.15	4.82	4.63	3.02	0.2	2.22	0.05	5.74	4.29	5.16	0.34	0.44	0.39	4.19	3.48	2.94	3.14	19	36.66	35.78	0.42	0.44	0.66	5.71	6.66	8.42	0.09	0.23	0.13	9.28	0.73	10.09	0.84
YBR025C	26.25	24.44	26.37	21.32	29.84	24.39	25.2	24.41	26.92	28.95	20.88	25.57	13.58	10.04	11.25	5.21	26.39	24.74	25.69	12.79	13.03	13.68	42.64	40.72	28.87	38.71	72.56	80.4	87.74	5.05	5.24	5.12	23.47	24.94	23.7	2.61	3.07	2.79	18.7	12.05	20.86	10.58
YBR026C	2.36	0.86	3	0.92	4.77	3.55	3.91	4.02	3.55	3.57	2.94	2.61	2.54	0.21	1.24	0.07	3.68	2.64	3.54	0.42	0.54	0.3	3.37	2.63	2.15	2.39	21.54	28.38	31.3	0.31	0.53	0.74	4.33	4.86	5.47	0.11	0.16	0.13	7.42	0.74	8.75	0.73
YBR028C	17.81	9.97	22.33	9.39	50.28	41	45.95	39.9	44.46	48.53	36.25	41.75	12.17	1.61	11.7	1.23	31.69	29.29	31.32	5.89	7.51	7.29	22.12	16.58	20.16	21.06	59.57	131.85	140.26	4.05	3.76	3.47	18.59	19.96	23.9	0.59	1.71	0.77	23.72	2.99	26.46	3.92
YBR029C	6.55	3.96	7.34	2.91	16.62	14.66	16.96	13.73	22.58	23.65	17.71	19.45	5.24	0.7	3.17	0.25	11.34	10.88	9.45	2.16	2.03	2.14	8.05	8.12	7.83	9.42	61.18	123.57	121.84	2.65	1.95	2.11	14.62	17.22	21.99	0.45	1.19	0.76	24.99	6.66	24.04	9.6
YBR030W	5.87	3.27	6.33	3.34	13.64	11.71	12.38	10.03	16.78	17.02	11.89	14.18	3.34	0.48	2.8	0.25	8.4	7.88	9.06	1.27	1.27	1.29	5.86	4.69	6.53	6.1	27.17	62.15	62.11	2.24	2.05	2.35	7.89	8.96	10.37	0.65	0.8	0.74	9.28	5.24	9.46	2.71
YBR031W	14.03	14.73	17.37	12.46	44.64	34.2	37.52	34.21	44.3	43.71	33.68	34.33	11.86	10.29	8.39	4.84	30.5	25.93	27.94	22.77	20.64	22.44	19.86	19.25	17.68	19.53	75.92	86.02	86.76	5.05	4.59	4.65	13.82	14.54	16.08	1.93	1.76	1.56	22.43	11.16	22.37	7.74
YBR033W	0.7	0.26	0.78	0.25	2.79	3.35	2.29	2.62	2.9	3.09	2.05	2.37	0.45	0.03	0.47	0.02	2.43	1.77	2.16	0.23	0.3	0.28	0.53	0.39	0.51	0.79	6.05	11.26	11.97	0.27	0.22	0.12	1.02	0.88	1.2	0.08	0.09	0.04	3.13	0.76	3.25	0.89
YBR034C	20.21	15.73	19.89	15.03	65.82	52.61	54.83	49.39	60.99	62.75	52.18	55.75	7.8	4.59	10.32	4.12	35.5	33.45	33.48	16.13	18.83	20.04	29.5	24.12	24.71	30.38	54.87	102.75	99.15	3.44	3.02	2.71	16.18	15.27	19.16	0.79	1.02	0.79	20.32	4.61	18.54	4.76
YBR035C	10.31	5.67	10.4	5.04	11.27	9.23	10.21	9.14	13.51	14.04	11.42	12	7.24	1.44	8.02	1.03	10.42	6.98	6.71	1.9	2.28	2.48	14.52	14.63	9.42	13.95	47.85	62.55	65.82	2.71	2.47	2.79	16.42	16.36	17.84	0.97	0.84	0.93	18.27	2.4	20.38	3.22
YBR036C	14.53	10.33	16.05	9.06	32.29	24.91	26.94	23.49	34.48	33.53	26.12	26.69	11.01	2.03	8.94	0.98	24.35	19.9	23.23	4.98	5.55	5.5	18.94	15.36	15.09	17.64	55.65	112.23	124.43	4.16	4.26	4.1	21.25	22.25	25.46	2.06	3.53	2.07	28.52	8.24	29.41	7.01
YBR037C	7.04	4.27	7.13	3.21	9.46	8.5	7.19	7.23	11.14	10.57	8.59	9.34	5.18	0.8	4.82	0.33	8.95	7	5.96	1.69	1.37	1.57	7.17	7.79	4.12	5.4	22.43	51.45	52.87	1.48	1.43	1.4	10.55	10.35	13.45	0.23	0.41	0.18	15.33	2.05	18.92	2.78
YBR038W	26.96	21.48	29.11	19.6	100.19	83.42	87.04	78.18	89.41	99.3	80.2	91.67	25.63	21.26	17.45	6.32	61.76	69.12	58.65	31.37	31.95	35.64	41.65	38.77	28	34.12	123.55	273.18	324.7	8.1	8.36	8.55	36.81	36.69	48.71	2.1	4.19	2.28	67.95	13.15	71.53	15.77
YBR039W	9.75	8.08	10.24	6.79	26.65	21.51	23.4	20.3	21.32	23.73	17.76	20.41	9.4	6.19	4.61	2.1	23.12	19.86	22.48	13.32	11.41	12.4	13.13	12.5	10.44	13.71	33.89	51.77	56.65	3.29	3.05	2.79	7.94	7.56	9.36	0.7	0.98	0.71	9.85	4.83	11.9	6.76
YBR041W	9.49	8.05	11.83	7.61	30.24	32.37	29.63	23.99	25.93	27.91	23.47	26.42	8.81	4.68	6.33	1.59	22.86	24.63	23.46	8.52	8.85	9.17	14.78	13.76	9.91	12.03	45.05	88.35	135.5	2.24	2.01	1.82	13.94	12.19	16.32	0.32	0.84	0.27	20.73	7.05	23.58	6.65
YBR042C	2.92	1.4	3.18	1.3	5.69	5.75	5.54	4.91	6.7	5.78	4.51	5.91	1.86	0.3	1.9	0.18	4.38	4.07	3.43	0.62	0.79	1.06	3.57	3.06	3.2	3.6	10.53	18.89	17.44	0.61	0.59	0.47	2.8	3.51	4.27	0.17	0.26	0.09	4.29	0.65	4.34	0.7
YBR043C	7.83	5.67	9.61	4.88	25.34	21.94	21.75	20.02	29.51	28.37	27.37	32.2	5.28	1.61	6.8	1.58	13.76	12.66	15.77	2.21	2.96	3	12.03	9.9	12.19	14.73	50.69	127.11	133.54	3.65	3.2	3.15	14.04	12.68	17.46	1.03	2	1.04	17.27	10.47	19.77	8.33
YBR044C	8.88	4.38	9.2	3.85	25.84	22.76	22.38	21.28	25.05	25.44	18.92	23.92	5.25	0.43	5.52	0.36	17.29	15.54	16.19	1.83	2.51	2.44	12.5	13.15	11.44	16.83	28.59	63.99	66.73	2.47	2.59	2.29	12.66	11.77	14.72	0.48	0.76	0.48	17.33	2.88	17.58	4.2
YBR045C	1.36	2.83	1.96	2.77	3	2.73	2.7	2.3	3	2.85	2.45	2.85	1.02	2.27	1.57	2.62	3.11	3.16	4.06	4.48	4.48	5.76	1.67	2.44	1.51	2.39	5.75	11.82	15.13	1.24	1	1.25	2.36	1.81	2.69	0.23	0.65	0.2	4.16	1.86	4.87	1.81
YBR046C	19.07	17.8	22.04	16.55	36.71	31.09	35.29	33.2	27.55	32.31	33.04	30.57	8.47	3.77	20.01	10.32	42.17	35.76	34.42	25.22	27.26	32.17	29.42	34.13	25.17	41.76	55.02	86.26	101.04	1.73	1.19	1	28.69	38.55	43.52	0.38	0.98	0.62	40.78	9.09	40.96	9.33
YBR047W	3.81	2.26	3.27	1.67	4.53	4.7	3.68	4.29	5.14	5.91	5.76	6.23	0.87	0.31	3.53	1.04	4.44	3.23	2.65	1.54	1.42	1.86	7.74	8.85	7.19	14.31	10.26	15.44	18.7	0.42	0.19	0.18	6.63	7.44	8.34	0.07	0.25	0.11	9.09	0.69	7.59	1.24
YBR048W	16.36	13.2	18.18	12.84	27.1	28.99	24.3	27.14	24.12	26.08	23.82	24.8	8.93	6.06	10.93	5.56	25.76	19.52	18.49	15.87	18.17	18.42	20.36	22.54	17.95	20.63	94.81	88.92	76.75	16.93	20.45	18.85	17.51	17.31	20.88	3.93	3.23	4.78	22.61	4.59	24.16	11.9
YBR049C	31.68	21.78	36.93	19.29	81.01	56.93	70.19	57.12	63	60.86	47.34	55.91	24.71	6.05	17.05	2.81	58.04	54.01	57.13	14.46	16.2	16.05	43.8	38.39	30.48	35.37	91.11	203.32	218.34	6.83	7.44	6.13	45.16	46.4	55.01	3.65	7.16	3.67	48.98	19.11	47.67	22.16
YBR050C	1.32	0.98	0.92	0.42	2.87	2.88	2.17	2.16	3.4	3.25	2.52	2.39	0.13	0.05	0.31	0.12	2.15	1.34	2.25	1.44	1.16	1.96	0.5	0.25	0.8	0.76	3.51	6.59	7.21	0.21	0.33	0.28	0.19	0.16	0.41	0.01	0.01	0.03	1.38	0.11	1.13	0.13
YBR052C	8.57	8.81	9.11	6.85	10.06	9.28	8.18	7.81	10.56	10.25	8.37	8.09	9.65	9.66	7.14	3.54	9.29	8.84	6.5	8.1	6.83	8.52	13.35	16.28	6.77	12.05	34.75	47.03	48.32	1.08	0.97	0.86	9.81	9.68	12.62	0.16	0.36	0.15	17.92	7.36	19.12	9.36
YBR053C	3.81	1.67	4.97	1.96	6.56	5.08	4.99	5.4	4.74	4.21	2.81	3.3	4.64	0.42	2.42	0.12	6.49	5.75	5.94	0.97	1.03	1.08	3.6	4.75	2.51	3.38	21.91	32.32	38.79	0.77	0.72	0.67	6.75	6.72	8.77	0.1	0.43	0.26	11.77	0.82	13.29	1
YBR054W	5.29	8.4	10.74	10.3	10.17	9.28	11.19	9.96	6.58	7.88	5.15	7.16	9.84	10.51	4.38	4.12	15.18	13.04	16.96	14.64	13.02	13.46	5.75	7.25	2.21	3.83	20.12	30.31	41.73	0.54	0.54	0.5	0.51	1.47	1.36	0.04	0.04	0.01	3.27	10.49	5.5	9.12
YBR055C	13.6	5.66	14.55	5.45	37.45	31.82	32.59	29.76	37.3	41.34	29.98	39.09	7.3	0.41	7.73	0.36	23.52	23.04	22.55	2	2.44	2.18	19.33	17.1	14.66	18.82	51.29	115.93	114.35	2.99	2.33	2.52	14.96	13.78	17.34	0.32	0.61	0.31	20.08	2.32	20.58	2.57
YBR056W	2.79	1.21	4.1	1.28	5.11	4.75	5.62	5.01	5.27	6.1	3.28	3.49	4.81	1.24	2.3	0.3	5.66	4.84	4.95	1.75	1.73	1.79	4.71	6.36	3.06	4.04	23.37	36.1	39	0.44	0.62	0.38	4.59	5.05	6.58	0.06	0.14	0.06	10.5	3.76	10.95	3.66
YBR056W-A	1.11	0.81	1.07	1.01	2.08	1.98	1.3	1.58	3.4	3.22	2.05	2.9	1.61	1.62	0.74	0.35	3.55	2.43	1.62	3.99	3.73	5.16	2.1	1.8	1.09	1.6	1.38	2.09	3.29	0.11	0.08	0.08	1.94	2.12	1.74	0.05	0.08	0.03	1.32	0.28	1.24	1.05
YBR057C	13.26	9.87	15.14	8.56	56.68	49.55	43	46.61	59.17	59.34	46.22	47.76	7.67	1.3	9.12	1.11	35.49	31.88	29.02	8.11	8.18	8.84	18.22	17.86	15.25	18.75	44.16	96.31	90.47	5.18	4.88	4.63	17.13	15.71	20.19	1.97	2.32	1.71	23.1	4.16	26	7.27
YBR058C	9.77	5.82	12.13	5.5	37.53	30.19	33.2	24.96	34.15	37.53	27.1	36.05	6.44	0.41	5.32	0.26	22.06	21.15	23.39	2.19	2.34	2.31	10.86	7.15	9	8.61	50.61	110.87	126.53	4.43	4.35	4.66	13.12	13.66	16.08	0.86	1.53	0.91	17.33	3.66	18.54	3.9
YBR058C-A	4.77	3.15	3.98	2.64	3.56	4.83	2.73	2.89	4.69	4.61	5.35	4.82	2.98	0.41	3.39	0.3	4.3	3.75	2.58	0.78	0.77	0.63	6.01	5.37	3.3	6.4	13.47	21.39	26.68	0.67	0.73	0.68	7.22	7.08	7.72	0.25	0.14	0.2	7.07	0.3	7.64	0.79
YBR059C	32.88	26.83	42.48	24.33	93.31	76.77	84.72	74.16	91.99	94	68.66	74.24	33.44	12.55	20.03	3.54	68.14	65.8	74.47	17.02	17.73	20	44.3	41.06	30.14	39.68	183.95	360.41	421.97	15.04	14.73	12.93	54.97	56.98	67.95	3.78	5.04	4.22	84.33	29.34	89.99	30.56
YBR060C	15.67	9.4	16.84	7.64	47.09	42	37.02	38.27	46.22	45.15	37.61	43.85	8.18	0.78	8.93	0.62	29.28	26.86	23.98	4.59	5.41	5.05	27.49	22.13	19.72	23.49	48.26	109.74	111.27	4.9	4.43	5.31	18.07	18.17	21.65	1.54	2.46	1.59	20.83	4.28	23.33	3.54
YBR061C	5	2.45	5.13	2.02	8.85	7.1	6.76	6.66	9.3	11.35	8.23	10.03	2.74	0.1	2.6	0.09	6.12	4.98	5	0.49	0.35	0.26	7.26	4.83	5.36	6.44	12.91	26.77	31.09	0.87	0.88	0.64	5.54	7	6.46	0.26	0.66	0.26	5.1	0.46	5.67	0.38
YBR062C	2.46	0.98	2.75	0.69	3.58	3.35	3.42	2.94	4.76	3.89	3.68	3.46	1.33	0.07	1.36	0.01	3.36	2.59	2.37	0.19	0.14	0.19	4.11	3.77	3.25	3.68	7.95	17.2	16.53	1.01	1.03	1.11	3.11	3.54	3.65	0.26	0.27	0.3	4.32	0.26	5.22	0.41
YBR063C	3.2	2.29	4.24	2.11	9.03	5.63	5.83	4.98	6.88	6.98	5.29	5.96	2.06	0.45	1.46	0.2	5.57	4.82	7.23	1.17	0.8	1.21	3.02	2.04	2.87	2.38	9.63	26.53	28.01	2.69	3.02	2.42	4.03	4.79	5.65	0.58	0.87	0.66	5.37	1.6	5.55	1.35
YBR065C	8.37	5.47	8.39	5.23	24.76	15.18	15.86	14.76	16.31	17.13	12.25	16.36	3.55	0.61	4.07	0.36	13.44	11.93	15.81	2.17	2.37	2.44	6.81	5.3	5.17	5.4	24.45	57.4	64	3.35	3.84	2.92	8.48	9.07	11.32	0.77	1.46	0.91	8.74	1.95	9.96	2.35
YBR066C	5.23	7.57	6.07	6.07	11.56	12.46	12.09	12.49	25.23	23.49	18.56	17.96	7.67	8.08	4.87	3.82	13.93	10.16	11.19	15.42	14.82	17.04	7.31	9.05	5.43	6.92	33.07	65.84	65.61	3.66	3.43	3.22	8.31	9	13.27	0.89	0.36	1.29	44.01	27.85	45.9	42.98
YBR067C	45.06	51.6	41.01	32.75	110.35	98.53	88.98	82.2	260.66	291.1	190.6	234.13	28.55	25.85	20.57	12.06	76.84	81.57	73.88	41.67	39.29	46.43	62.16	63.01	33.33	41.19	115.49	156.61	173.17	10.35	11.04	10.48	42.71	55.5	50.63	5.5	7.19	5.92	44.55	14.02	52.11	13.88
YBR068C	95.94	129.32	123.11	136.64	397.78	315.51	387.15	354.11	362.72	408.77	355.87	426.65	84.71	123.34	92.01	72.26	282.58	265.77	284.42	269.07	274.61	341.57	127.65	158.85	126.94	191.93	179.06	413.8	412.72	21.36	18.8	17.45	151.28	141.1	178.71	18.11	28.62	21.71	150.45	142.09	168.05	190.03
YBR069C	22.26	23.9	27	20.97	169.59	138.31	138.68	127.79	127.02	156.27	123.74	142.44	15.66	11.99	17.63	7.56	124.33	123.54	103.37	65.36	58.53	70.67	19.67	19.21	20.98	23.97	59.69	122.04	119.95	2.23	1.81	1.71	30.58	27.39	39.03	0.96	2.15	0.93	39.35	7.75	40.03	9.15
YBR070C	1.97	1.39	1.82	1.34	1.34	1.7	1.68	2.02	1.61	1.89	1.2	1.81	1.17	0.68	1.19	0.51	1.87	1.43	1.08	0.71	0.89	0.91	3.49	3.47	1.86	3.48	6.12	11.17	10.15	0.42	0.4	0.39	2.11	1.51	2.39	0.02	0.05	0.03	3.29	1.34	3.63	1.89
YBR071W	24.96	30.22	29.16	31.52	57.42	57.28	56.02	58.36	38.79	45.04	37.16	44.12	15.44	18.47	21.09	14.66	50.89	42.65	36.72	43.97	50.5	50.07	42.26	45.45	25.85	38.17	70.73	173.17	176.04	4.69	4.46	4.04	30.64	29.09	40.67	0.93	1.17	0.91	46.47	14	56.07	35.78
YBR072W	1.62	1.72	1.86	1.43	1.82	2.8	1.97	2.48	0.23	0.56	0.13	0.59	8.07	13.03	4.23	3.32	20.1	13.2	11.66	28.84	18.97	27.29	0.84	1.56	0.26	0.4	4.96	4.26	5.81	0.63	0.56	0.55	1.26	1.86	2.79	0.1	0.09	0.13	3.62	5.28	5.22	11.91
YBR073W	33.28	33.69	40.98	32.67	95.9	76.9	87.42	70.19	63.84	66.11	49.92	61.76	27.72	21	21.57	9.07	55.13	55.05	52.74	27.8	33.3	32.1	40.86	37.15	30.62	39.69	153.26	354.14	373.58	15.88	14.82	14.51	46.4	43.07	56.22	1.08	2.44	1.04	57.02	14.91	61.89	24.45
YBR074W	11.96	6.19	14.18	5.8	30.87	22.96	24.62	23.17	24.22	27.33	19.23	26.18	7.19	0.58	6.3	0.38	17.29	18.77	17.99	1.54	1.7	2.01	15.34	12.8	10.65	14.73	52.63	106.44	111.62	5.43	5.54	5.25	14.46	14.8	17.28	1.4	2.11	1.4	18.65	2.53	18.94	3.63
YBR077C	3.76	2.68	4.09	2.31	5.14	4.73	3.83	3.97	6.35	5.14	4.26	3.83	2.58	1.06	1.71	0.4	4.85	2.98	3.54	1.91	2.28	1.77	5.35	5.24	3.78	5.5	12.5	28.78	32.42	1.18	1.04	1.05	7.12	6.72	8.53	0.33	0.34	0.3	10.28	3.22	11.7	4.36
YBR078W	35.29	44.82	44.3	39.15	120.34	87.65	112.93	100.86	93.02	98.02	82.03	92.84	38.63	45.32	22.8	17.44	83.43	84.68	91.31	68.9	73.99	80.21	43.4	39.3	32.69	38.65	148.15	217.15	225.2	9.59	8.56	7.03	22.57	23.59	28.8	2.79	2.36	2.74	43.58	51.46	45.78	58.67
YBR079C	54.12	35.94	62.75	32.72	158.18	116.82	137.34	108.81	173.84	166.92	124.45	142.57	42.11	9.3	27.13	3.91	82.09	84.66	93.66	17.18	17.88	19.05	86.89	66.62	74.5	81.08	217.65	443.78	448.36	26.64	26.14	25.85	73.98	84.49	93.36	12.92	14.85	13.61	94.48	27.2	90.42	22.27
YBR080C	13.1	8.54	14.87	7.5	31.37	26.52	29.6	24.75	31.38	33.08	24.38	29.43	10.54	1.17	8.31	0.57	21.4	20.84	22.87	3.15	4.03	3.45	15.28	13.63	11.52	14.1	71	117.46	129.19	6.16	5.74	5.3	16.27	16.82	21.45	1.36	1.59	1.41	24.75	6.1	26.26	5.77
YBR081C	40.69	32.63	48.61	26.73	101.24	73.67	88.78	71.66	81.43	89.47	63.71	78.15	27.29	4.54	21.87	2.13	63.25	57.87	69.96	11.2	11.8	11.84	48.2	37.06	40.74	44.66	181.56	402.14	437.3	20.54	19.81	19.37	48.73	48.89	61.91	5.21	8.11	4.98	65.77	28.93	66.11	29.43
YBR082C	119.45	106.1	107.62	79.59	99.58	102.66	84.26	83.76	109.8	128.89	97.28	110.19	51.9	53.59	58.03	26	119.82	94.18	58.21	72.45	71.28	73.72	177.24	185.78	87.45	136.75	243.22	307.67	322.81	17.97	17.83	17.23	103.1	112.87	114.12	6.77	8.97	6.4	107.38	38.47	127.27	105.17
YBR083W	23.02	29.63	26.71	23.66	123.55	108.89	114.99	106.81	138.43	146.34	104.98	117.24	24.92	27.48	15.54	10.46	96.32	92.93	89.08	85.32	81.49	95.87	33.32	39.07	22.46	32.43	78.76	187.72	187.73	7.27	7.86	7.52	18.98	11.49	16.83	0.84	1.08	0.72	43.15	48.21	52.21	78.06
YBR084C-A	38.65	26.42	37.6	23.63	31.95	28.39	25.86	27.6	34.37	26.98	27.1	27.78	23.16	12.75	22	7.99	26.52	19.9	19.5	14.02	14.03	15.51	51	48.1	32.48	43.36	155.91	131.77	122.33	11.72	9.38	10.45	37	41.65	48.16	3.93	3.7	4.48	49.36	13.03	50.12	13.95
YBR084W	21.1	10.13	24.86	10.54	71.4	54.93	60.42	49.13	55.52	57.27	44.82	55.19	10.85	2.15	9.91	1.38	32.71	32.79	35	4.66	5.37	5.8	28.86	20.71	28.88	33.79	79.28	137.4	139.84	6.05	5.87	6.48	21.94	26.09	27.4	2.16	2.47	1.93	25.39	7.79	22.75	6.03
YBR085C-A	6.12	5.76	8.76	5.42	5.32	4.98	4.87	4.48	5.47	5.99	3.88	3.99	7.3	6.72	3.41	1.68	7.34	4.93	4.5	7.16	6.55	6.45	9.91	12.83	5.49	7.83	39.79	57.64	60.5	0.93	1.01	0.62	9.2	11.91	13.51	0.18	0.2	0.17	26.15	33.1	25.68	35.44
YBR085W	0.33	0.19	0.24	0.17	0.82	0.88	0.26	0.48	1.08	1.07	0.6	0.51	0.27	0.11	0.12	0.05	0.23	0.2	0.4	0.06	0.13	0.13	0.45	0.52	0.42	0.52	3.21	5.47	5.39	0.16	0.12	0.24	1.02	1.19	1.28	0.03	0.02	0.07	1	0.33	1.39	0.6
YBR086C	31.15	22.89	38.39	22.22	119.65	93.43	100.78	88.33	92.59	100.52	70.16	81.26	32.71	17.1	19.58	4.78	79.12	81.62	82.68	33.91	34.33	35.6	48.15	49.11	39.31	41.64	126.35	227.76	265.25	6.28	6.59	6.23	42.51	42.95	52.05	2.7	4.87	2.57	56.73	20.62	62.52	29.7
YBR087W	1.74	1.12	2.51	1.21	3.4	3.45	3.13	2.76	3.96	3.86	2.32	2.63	1.91	0.58	0.93	0.26	2.38	2.29	2.53	0.7	0.76	0.78	3.26	3.02	2.07	2.89	9.14	19.78	16.25	0.54	0.41	0.52	2.4	3.02	3.06	0.08	0.09	0.07	3.45	0.46	2.98	0.59
YBR088C	7.55	9.28	7.48	7.6	13.85	15.56	14.9	12.17	12.6	13.05	10.02	11.55	8.06	12.02	5.45	4.38	9.23	8.48	6.97	11.39	11.21	11.09	11.71	12.35	6.91	10.52	28.82	62.95	60.71	1.15	1.24	1.13	9.64	9.03	11.46	0.12	0.23	0.14	14.01	3.44	15.61	6.09
YBR089C-A	0.47	0.96	0.74	0.61	0.24	0.38	0.17	0.23	0.25	0.05	0.13	0.08	0.67	1.03	0.3	0.24	0.32	0.32	0.23	0.18	0.24	0.3	0.95	1.51	0.89	1.42	3.58	5.15	4.06	0.07	0.05	0.06	0.92	0.84	1.11	0.01	0.05	0.02	1.43	0.19	1.77	1.36
YBR090C	2	1.99	1.57	1.38	2.24	2	1.74	1.95	2.72	2.42	1.96	1.54	0.63	0.84	1.21	0.98	1.66	1.61	0.89	1.96	1.97	1.79	1.93	2.65	2.12	3.15	3.62	10.69	12.81	0.09	0.11	0.04	1.94	1.67	2.57	0.04	0.04	0.01	4.61	3.11	6	4.7
YBR091C	2.23	1.87	2.08	1.09	1.55	1.55	1.19	1.58	2.85	1.94	1.61	1.25	0.75	0.12	0.97	0.05	1.6	1.2	1.31	0.24	0.3	0.35	2.14	1.35	1.93	1.5	4.59	6.75	8.82	0.28	0.33	0.32	2.4	2.31	3	0.11	0.12	0.09	1.3	0.22	1.54	0.21
YBR092C	11.53	7.72	15.05	9.54	41.11	31.99	29.37	26.82	49.45	47.68	29.58	31.69	11.63	4.23	5.2	1.19	13.93	13.25	12.53	2.99	3.17	3.02	17.95	14.4	10.68	11.56	88.65	140.13	150.2	4.58	3.2	3.99	9.01	8.1	9.09	0.24	0.28	0.22	28.07	1.08	30.97	2.36
YBR093C	4.58	2.29	4.63	1.99	17.83	15.16	16.67	16.23	24.87	24.69	15.77	16.44	1.27	0.59	0.97	0.26	5.12	5.14	5.47	1.96	2.69	2.57	4.9	2.49	3.86	3.02	93.91	123.01	141.17	4.5	4.39	4.76	3.71	4.38	5.29	0.39	0.21	0.24	18.67	2.47	17.43	2.6
YBR094W	5.9	3.7	6.88	3.06	13.93	11.61	13.77	11.48	15.12	15.24	10.75	12.51	4.37	0.37	2.31	0.15	9.15	9.66	10.11	0.76	0.82	0.88	6.41	4.44	5.06	5.64	28.67	56.2	60.29	2.09	1.94	1.79	8.46	8.63	10.71	0.44	0.77	0.47	11.33	2.92	11.25	2.9
YBR095C	11.89	8.21	13.24	7.23	26.6	22.31	21.92	22.5	23.94	24.26	18.96	23.07	5.83	0.54	7.05	0.39	16.69	16.04	16.61	2.79	2.56	2.8	14.06	12.55	12.66	15.47	44.16	95.11	106.23	3.67	3.61	3.17	15.94	16.77	20.62	1.16	2	1.12	19.11	3.79	21.67	4.62
YBR096W	3.98	2.9	4.68	2.42	4.98	3.35	3.86	2.98	4.41	4.05	3.01	3.46	3.77	0.55	1.91	0.27	3.98	3.04	3.73	0.73	1.2	0.69	6.06	5.9	5.01	6.67	21.31	36.74	39.56	1.49	1.61	1.09	7.7	7.82	8.99	0.53	0.75	0.49	13.06	0.86	12.84	1.27
YBR097W	9.08	5.76	10.76	5.29	21.07	17.04	18.67	17.61	19.33	19.1	13.99	17.67	5.88	0.43	5.25	0.26	15.33	15.36	17.62	1.87	2.06	1.94	9.05	8.12	7.19	8.67	35.98	78.63	81.16	2.38	2.11	1.85	10.66	10.75	13.63	0.42	0.65	0.38	13.95	4.56	14.28	4.47
YBR098W	3.36	1.59	3.7	1.8	10.96	11.01	10.23	9.48	8.29	9.62	7.45	8.04	2.19	0.1	2.3	0.06	6.74	6.48	6.76	0.44	0.48	0.43	3.7	3.71	3.23	3.95	19.45	45.58	46.36	1.26	1.35	1.08	6.19	4.89	7.19	0.23	0.38	0.22	6.91	1.02	7.01	1.09
YBR101C	109.79	101.03	113.04	76.54	51.31	42.7	42.33	36.09	60.56	59.64	44.82	49.44	32.56	35.97	39.35	16.63	73.63	64.82	57.93	32.13	31.23	30.48	155.63	144.93	79.77	103.65	130.19	253.17	308.39	7.24	6.61	6.15	125.33	150.13	135.61	3.59	7.74	2.56	63.36	30.57	72.99	37.09
YBR102C	15.8	10.26	16.4	7.62	39.35	33.39	35.43	28.65	32.59	36.97	27.22	34.22	8.3	0.48	8.83	0.22	23.86	24.22	24.07	2.52	2.48	2.7	18.61	16.41	14.03	16.89	62.82	141.09	142.08	6.12	5.86	5.24	19.53	22.43	24.47	1.52	2.19	1.47	26.88	6.06	25.25	6.22
YBR103W	11.23	6.95	12.73	5.51	20.96	17.39	16.87	15.11	19.13	19.23	13.88	15.73	6.8	0.28	6.38	0.22	13.78	11.93	14.45	1.14	1.66	1.04	14.94	12.21	14.37	15.98	46.4	116.25	114.63	3.58	2.84	3.17	16.96	18.69	21.59	0.76	1.77	0.82	19.89	4.13	21.61	4.22
YBR104W	9.9	4.36	9.34	4.61	22.7	17.41	18.64	17.59	24.32	23.52	24.14	24.75	4.65	1.72	8.06	1.95	7.55	6.79	8	2.77	2.51	3.62	17.9	13.83	24.6	33.92	41.28	84.33	83.54	3.71	3.12	2.74	21.18	23.24	24.85	1.09	1.22	1.07	20.59	6.77	19.82	4.46
YBR105C	25.31	31.19	27.31	22.9	179.31	155.77	143.61	150.55	127.39	154.59	134.29	166.41	11.28	10.89	21.42	12.77	125.97	108.04	108.46	104.65	99.08	141.09	35.22	31.92	24.81	34.48	80.51	189.49	194.95	3.35	2.87	2.76	30.92	20.68	37.53	0.92	1.18	0.89	59.23	36.87	67.9	54.8
YBR106W	20.02	18.35	18.62	14.92	23.47	23.31	21.69	20.73	31.43	25.84	24.43	24.37	11.34	10.04	10.75	6.63	23.48	17.7	18.04	19.28	20.47	19.76	27.62	28.88	20.75	29	70.77	83.53	89.56	2.79	2.74	2.57	21.57	21.8	23.23	1.03	1.12	1.08	30.82	9.46	33.52	19.24
YBR107C	4.25	1.76	4.09	1.8	6.87	6.38	5.62	6.18	7.48	8.52	6.13	7.34	1.77	0.12	2.77	0.12	5.95	5.59	4.46	0.44	0.72	0.58	4.34	4.98	3.21	4.68	12.09	22.67	28.92	1.21	0.82	0.75	5.22	6.17	7.07	0.21	0.25	0.18	7.12	0.24	7.29	0.65
YBR108W	19.07	10.48	24.2	11.31	66.05	57.81	56.89	53.5	53.93	57.24	43.63	47.58	17.65	2.36	14.05	0.92	53.96	47.9	46.99	8.91	8.79	9.15	24.33	25.06	14.53	18.21	114.78	255.98	304.11	8.06	7.62	8.11	42.85	41.95	54.58	2.03	2.65	1.76	54.32	6.73	60.25	10.23
YBR109C	12.31	8.26	11.47	6.82	20.73	17.46	15.74	16.09	24.34	21.97	16.98	21.13	6.35	1.81	5.83	0.91	19.29	17.86	16.42	5.13	4.54	5	16.32	15.46	11.1	14.82	50.73	58.37	62.67	3.87	3.59	3.82	16.06	18.87	21.55	1.51	2.12	1.63	20.62	3.03	23.66	5
YBR110W	7.28	3.88	8.41	3.36	21.31	16.33	16.35	15.13	16.71	16.54	12.63	14.18	4.65	0.41	3.8	0.14	13.42	12.18	12.08	1.61	1.55	1.75	7.81	6.59	6.84	7.8	31.39	57.4	70.37	1.81	2.02	1.63	12.39	12.66	16.69	0.43	1.11	0.45	15.65	1.88	16.52	1.3
YBR111C	5.14	2.75	6.05	2.4	7.08	6.48	6.23	5.17	8.92	7.48	5.87	6.25	5.28	1	3.66	0.25	7.06	5.5	5.56	1.22	1.25	1.27	8.26	8.71	5.65	7.76	32.36	37.79	42.85	1.13	1.56	1.37	8.62	9.63	11.63	0.31	0.52	0.37	14.63	1.8	15.99	2.4
YBR111W-A	2.43	1.56	2.6	1.22	2.27	2.55	1.65	2.14	3.1	2.32	1.7	1.97	1.33	0.18	1.47	0.07	2.17	1.27	1.27	0.15	0.2	0.32	2.57	2.77	1.57	2.54	7.65	11.5	14.35	0.51	0.75	0.59	2.94	3.35	3.65	0.22	0.24	0.2	4.51	0.13	4.87	0.76
YBR112C	119.61	116.61	126.82	95.67	447.63	363.89	385.21	353.63	363.08	424.76	336.58	381.49	113.71	114.25	85.79	35.71	282.22	267.36	233.02	161.46	148.85	167.9	195.01	210.91	132.92	190.38	446.05	1150.78	1225	19.38	19.25	20.07	188.25	192.4	241.03	7.55	13.46	7.56	262.93	141.1	309.19	285.53
YBR114W	10.08	9	12.56	8.69	46.43	36.72	37.89	37.15	29.59	34.01	23.18	30.15	8.34	7.58	7.3	2.53	26.82	26.2	29.73	13.83	13.26	16.18	14.07	15.68	11.84	13.71	32.81	72.92	87.39	3.31	2.18	2.31	8.7	7.37	12.15	0.4	0.36	0.26	14.76	10.88	15.84	13.04
YBR118W	45.27	52.02	43.06	42.51	42.11	36.9	42.71	28.63	30.27	42.24	32.35	40.74	37.92	44.25	26.97	17.19	33.07	27.24	27.5	28.95	26.44	31.22	57.09	62.07	32.01	49.49	302.46	205.17	203.91	19.59	19.18	17.53	52.21	54.1	60.84	10.75	7.09	10.1	64.25	56.47	69.21	76.03
YBR119W	5.96	3.78	5.86	3.1	14.04	14.96	11.54	10.58	13.63	17.1	12.67	14.58	3.95	0.48	4.32	0.32	10.95	9.2	7.53	1.28	1.17	1.23	8.89	10.42	6.41	9.61	16.27	32.56	34.1	0.91	0.76	0.45	6.7	7.19	9.3	0.27	0.39	0.45	9.82	1.06	11.83	2.82
YBR120C	5.8	2.95	4.99	2.62	6	7	4.61	5.83	7.23	7.59	5.98	6.92	2.71	0.34	4.02	0.19	6.08	4.43	3.92	0.97	0.93	1.01	7.1	9.46	5.13	8.63	15.3	31.76	28.5	0.68	0.85	0.62	5.3	5.33	7.29	0.21	0.39	0.29	7.39	0.76	9.23	2.43
YBR121C	24.72	15.28	27.81	14.09	67.53	49.13	55.12	45.32	59.75	61.85	48.14	59.5	18.85	3.98	13.26	1.63	36.35	34.95	42.23	7.51	7.56	8.03	42	34.59	34.74	40.6	127.88	164.57	178.84	10.25	9.94	9.62	26.97	29.71	33.23	4.43	5.08	5	33.38	8.33	31.1	6.04
YBR122C	17.49	13.13	16.96	10.97	22.55	19.11	19.8	17.29	24.47	25.09	20.52	23.44	8.25	1.31	10.35	1.02	21.59	15.84	15.39	4.14	4.45	4.62	20.57	18.72	16.25	22.69	41.66	93.02	101.75	4.58	4.96	5.14	21.81	23.62	28.82	2.23	2.4	1.97	25.88	4.74	27.47	5.01
YBR123C	10.27	5.95	9.93	5.14	26.02	20.76	19.74	17.7	24.34	22.16	16.6	20.73	5.99	0.37	5.37	0.21	16.16	14.72	14.83	1.51	1.77	1.96	11.55	9.83	9.7	11.38	45.39	105.4	116.45	2.71	2.59	2.5	13.16	12.73	17.03	0.63	1.66	0.67	21.75	5.04	22.25	5.41
YBR125C	8.99	6.69	10.71	5.85	18.28	14.93	14.24	13.29	18.75	18.64	13.72	14.37	4.85	0.97	4.84	0.61	11.66	9.86	12.08	1.78	2.25	2.44	11.58	11.22	9.08	10.93	22.4	49.52	49.51	2.16	2.18	1.92	9.31	8.79	10.67	0.54	0.89	0.51	13.49	3.4	13.42	4.74
YBR126C	20.98	29.95	30.54	25.53	33.42	28.39	31.43	30.86	37.7	42.96	29.27	27.86	72.53	109.54	22.23	19.47	40.54	33.36	37.09	50.68	40.1	49.6	35.19	43.88	19.77	29.39	140.39	248.99	312.87	7.76	8.9	6.96	33.89	37.37	48.12	2.14	3.54	2.62	113.83	114.42	121.14	143.52
YBR126W-A	0.86	0.89	0.62	0.75	0.9	0.73	0.58	0.55	0.5	0.69	0.74	0.64	0.75	1.31	0.77	0.73	0.72	0.45	0.49	1.09	0.7	0.93	1.43	2.24	0.47	1.3	2.76	2.01	2.94	0.15	0.19	0.09	0.65	1.14	1.2	0.09	0.03	0.06	2.21	0.89	2.7	2.32
YBR127C	21.56	16.4	24.65	15.32	55.97	46.48	49.14	42.91	56.35	55.24	39.28	48.24	20.02	8.21	12.65	3.46	40.43	38.19	40.94	14.43	12.76	15.96	30.16	30.8	24.51	28.06	196.15	182.26	199.29	18.87	16.6	16.72	30.88	33.02	37.99	6.45	6.49	7.14	42.48	20.49	41.82	17.52
YBR128C	1.97	1.04	1.92	1	2.9	2.55	2.32	1.84	2.32	2.42	1.7	1.65	1.21	0.06	1.07	0.04	2.7	2.25	1.81	0.28	0.27	0.43	1.4	1.37	0.89	1.2	6.38	13.35	15.06	0.25	0.38	0.28	2.31	2.16	3.54	0.05	0.07	0.01	3.59	0.48	3.63	1.41
YBR129C	5.2	3.18	5.49	2.53	9.43	7.9	7.68	6.57	10.18	10.81	7.09	8.04	2.39	0.18	2.97	0.11	7.21	5.98	6.38	0.52	0.85	0.8	3.92	3.27	3.2	3.44	13.92	27.25	26.89	1.01	0.98	0.76	5.51	4.96	6.97	0.34	0.41	0.21	7.77	1.45	6.91	1.13
YBR130C	24.55	17.55	24.95	14.41	65.37	54.51	56.74	52.92	60.21	64.94	53.2	64.37	10.7	1.89	15.59	1.94	51.93	42.38	40.59	11.05	11.3	12.17	36.99	35.46	29.41	39.42	62.71	145.84	141.8	6.89	6.91	5.92	30.17	30.97	37.06	3.73	5.05	3.18	32.06	5.73	36.32	8.98
YBR131W	13.56	8.61	14.91	7.49	33.55	26.19	25.95	24.06	28.28	31.22	21.44	26.72	5.19	0.4	7.54	1.49	18.59	18.04	20.08	2.99	2.89	3.39	14.12	11.82	15.03	17.88	46.84	118.82	116.38	8.1	8.49	8.7	15.76	15.43	19.2	1.25	2.3	1.49	18.13	3.09	20.33	3.73
YBR132C	8.2	11.49	10.16	9.84	24.7	18.96	20.93	21.47	11.95	17.07	10.86	14.18	10.18	14.68	10.17	8.2	26.71	24.24	28.53	20.82	22.48	28.2	9.16	9.97	7.5	9.76	38.22	87.31	115.4	3.24	3.02	2.6	14.31	11.68	18.07	1	2.09	1.04	23.96	16.16	24.44	16.4
YBR133C	15.68	13.16	16.27	11.89	33.24	26.69	29.66	27.12	43.62	38.83	28.75	34.09	12.4	3.63	9.52	1.96	23.01	24.18	26.91	6.85	7.18	8.22	18.85	18.17	12.84	18.16	51.92	114.97	118.69	9.11	9.03	9.95	21.86	20.15	27.26	2.55	4.9	2.9	39	18.2	41.41	20.88
YBR135W	10.03	7.74	8.91	5.67	14.09	14.16	9.39	11.32	19.3	17.98	15.04	15.19	6.49	2.64	6.87	1.4	13.25	9.34	7.86	4.64	4	4.7	10.93	10.17	7.05	10.26	26.5	42.21	43.13	3.06	3.13	3.72	11.13	10.5	12.7	1.28	1.52	1.04	16.03	1.19	19.32	3.71
YBR136W	11.04	5.91	12.86	5.71	33.61	25.14	28.07	23.81	27.55	29.01	20.59	26.32	7.15	0.98	5.56	0.36	18.67	19.61	23.32	1.61	1.87	1.79	11.01	7.43	9.05	8.36	47.82	106.6	113.44	7.54	7.42	6.71	13.6	14.92	18.31	2.02	2.89	1.98	19.51	2.79	18.94	2.16
YBR137W	0.99	0.34	0.9	0.31	1.58	1.25	1.07	1.08	1.56	1.36	1.09	1.14	0.87	0.15	0.65	0.06	1.19	1.11	0.89	0.24	0.37	0.3	1.65	1.4	1.29	1.36	6.31	9	9.87	0.13	0.12	0.16	1.89	2.54	2.57	0.04	0.06	0.03	3.51	0.41	4.26	0.59
YBR138C	6.06	3.6	6.8	3.06	19.02	16.68	15.05	15.89	20.69	21.07	15.64	18.87	3.96	1.09	4.09	0.42	11.16	9.61	9.38	2.47	2.11	2.7	10.67	11.43	8.43	10.08	33.82	92.54	98.45	4.49	4.27	3.62	10.84	9.73	14.4	0.92	1.16	0.83	21.89	1.95	22.75	3.11
YBR139W	5.99	7.49	8.12	6.59	12.04	11.03	11.74	11.32	10.81	13.45	9.55	10.11	11.95	13.93	5.81	3.91	12.61	9.86	9.57	10.22	9.8	12.23	10.6	12.02	4	7.22	52.41	80.56	97.26	3.01	2.84	2.23	10.54	10.21	14.12	0.47	0.86	0.6	22.53	12.1	26.99	19.15
YBR140C	61.13	51.51	72.75	45.15	147.6	113.97	126.56	110.96	124.39	132.86	98.38	130.2	43.14	9.83	34.05	4.57	99.89	106.84	116.37	20.97	23.26	26.51	65.31	51.01	50.09	53.9	239.97	507.22	550.25	30.65	29.44	28.54	66.63	66.46	84.07	7.33	12.87	8.17	84.04	25.58	90.32	33.65
YBR141C	5.49	2.95	5.03	2.11	13.04	9.28	8.73	9.21	11.72	10.65	9.44	9.39	1.44	0.11	2.51	0.18	6.29	6.09	5.58	0.52	0.58	0.82	6.17	4.18	5.25	5.76	10.68	22.51	23.04	1.01	0.84	0.9	4.91	5.4	6.36	0.24	0.41	0.32	4.1	0.39	4.34	0.35
YBR142W	15.97	8.23	16.67	6.89	45.75	32.14	39	29.6	37.83	39.58	30.47	37.49	5.78	0.71	6.52	0.62	19.82	17.43	20.01	1.8	2.41	2.63	21.88	15.5	23.02	25.56	39.72	84.9	74.72	3.44	2.91	2.93	11.63	13.35	13	0.65	1.24	0.81	14.63	1.86	11.12	1.84
YBR143C	50.37	37.02	58.01	32.12	111.2	88.18	95.5	84.12	99.7	105.1	82.76	105.82	38.63	12.15	30.79	6.48	68.67	72.14	77.99	19.91	20.06	20.9	87.18	77.71	76.52	92.8	197.76	391.69	421.12	15.93	15.18	14.43	67.41	79.34	89.98	6.39	11.13	6.46	94.64	17.89	95.29	23.96
YBR145W	1.18	1.09	1.51	1.17	6.58	6.23	6.2	6.27	11.16	8.98	8.43	10.11	1.65	2.91	1.09	1.01	2.45	1.8	2.72	3.26	2.65	3.84	2.89	1.99	3.89	4.68	24.56	48.32	47.55	1.36	1.46	1.16	4.27	4.75	5.77	0.11	0.26	0.18	7.91	6.77	7.74	3.87
YBR146W	15.32	10.64	16.29	9.19	39.19	33.02	30.73	30.65	39.47	37.45	30.16	35.5	10.02	1.36	9.48	0.74	31.11	24.95	25.1	5.71	5	5.65	20.65	15.91	15.24	19.69	46.77	100.74	116.24	4.12	4.9	4.51	20.11	21.36	24.38	1.58	2.67	1.67	24.26	3.37	27.11	4.57
YBR147W	0.16	0.15	0.18	0.04	0.63	0.85	0.72	0.73	0.98	1.23	0.69	1.04	0.31	0.24	0.15	0.07	0.7	0.59	0.75	0.44	0.37	0.67	0.19	0.2	0.29	0.49	2.58	4.74	5.46	0.55	0.77	0.5	0.37	0.26	0.55	0.21	0.13	0.3	1.32	0.28	1.34	0.33
YBR148W	0.37	0.2	0.38	0.17	3.32	2.73	2.2	2.32	2.37	2.48	1.41	1.62	0.25	0.39	0.21	0.08	1.59	1.48	0.94	0.49	0.24	0.58	0.31	0.36	0.22	0.13	4.78	14.71	16.53	2.09	2.35	1.75	0.76	1.26	1.5	0.98	0.46	1.24	3.75	0.46	4.26	0.62
YBR149W	8.03	7.74	9.59	6.82	12.8	13.73	12.9	12.77	15.45	17.74	11.62	14.45	12.6	12.42	7.85	4.14	15.06	13.52	11.59	9.69	9.51	10.12	15.2	17.28	7.35	12.96	52.97	61.98	72.19	2.26	2.04	2.17	12.59	13.57	15.35	0.6	0.55	0.72	26.74	6.94	31.15	10.77
YBR150C	7.9	6.6	9.2	5.73	22.68	20.76	20.41	19.08	22.86	24.93	15.95	19.08	4.37	1.86	4.13	1.05	15.14	15.38	18.32	3.98	4.21	4.83	12.21	11.59	10.47	12.44	36.39	86.1	101.04	4.87	4.13	4.03	13.48	13.03	15.21	0.77	1.13	0.65	13.17	6.92	14.33	6
YBR151W	24.13	17.1	25.22	14.17	52.23	42.05	41.17	39.1	47.43	50.95	43.25	47.79	21.04	10.98	19.57	3.89	37.49	33.61	30.12	15.93	14.9	16.55	35.8	35.6	22	32.47	86.07	164.57	182.2	5.54	5.65	4.99	30.12	30.69	40.1	1.69	2.79	1.5	43.88	13.67	51.07	18.09
YBR152W	6.94	3.26	7.72	2.95	25.78	23.74	22.18	20.64	27.07	30.82	22.02	27.3	3.09	0.39	3.89	0.19	13.97	14.09	13.61	0.73	1.07	0.93	8.37	7.57	7.12	7.85	29.04	75.81	75.56	1.48	1.56	1.46	7.38	7.63	9.86	0.36	0.75	0.45	8.91	1.08	9.96	1.05
YBR153W	5.9	3.47	6.8	2.93	17.86	16.71	15.89	13.41	20.09	19.26	15.53	16.95	3.24	0.5	3.88	0.42	11.85	10.72	10.11	2.11	1.97	1.92	8.08	7.61	7.08	9	16.35	42.37	46.22	1.56	1.38	1.45	6.97	5.77	8.34	0.48	0.51	0.6	7.48	1.84	8.68	2.6
YBR154C	38.95	25.9	38.2	19.86	61.89	53.68	48.1	43.44	63.73	72.95	60.28	71.9	20.13	8.49	23.58	5.78	42.07	37.1	27.43	12.77	12.85	12.28	62.74	57.96	43.04	65.29	84.02	171.4	168.2	6.4	5.89	6.13	36.59	42.05	45.59	2.44	3.86	2.63	46.88	3.18	46.38	5.92
YBR155W	22.06	13.06	20.59	9.53	33.9	27.74	23.98	24.25	29.11	27.7	24.9	25.44	6.18	0.58	9.32	1.19	19.52	17.65	16.68	2.63	2.51	2.01	27.19	17.76	25.39	25.85	41.1	81.84	84.66	2.1	2.02	2.36	20.07	22.83	23.43	0.65	1.39	0.68	18.19	1.69	16.02	2.14
YBR156C	9.01	6.19	9.89	4.68	36.24	32.87	34.13	29.11	32.13	33.93	26.01	30.6	5.47	3.38	5.06	0.96	19.27	22.54	19.19	3.85	4.27	4.21	11.28	11.52	9.29	11.98	39.68	107.81	107.77	6.01	5.34	5.78	12.42	11.77	14.58	1.3	1.12	1.34	16.16	2.94	16.6	6.57
YBR157C	7.89	10.91	7.85	9.58	16.8	15.36	15.4	17.06	12.32	12.86	11.06	10.96	16.4	24.16	8.96	8.81	21.08	16.04	16.73	20.45	18.79	21.94	5.11	7.06	4.08	5.25	10.38	23.88	28.01	4.61	3.77	3.67	5.1	3.44	6.66	0.45	0.28	0.44	10.07	4.31	12.38	8.44
YBR158W	39.07	50.55	48.47	46.41	145.01	119.82	141.98	123.36	134.85	147.83	112.45	143.71	40.18	60.1	23.18	22.12	78.16	88.25	85.99	72.01	81.05	86.64	56.14	54.44	43.41	51.62	127.54	314.35	305.8	7.04	6.54	7	33.77	33.88	46.12	3.15	5.47	3.75	48.52	49.87	60.51	57.72
YBR159W	6	4.07	7.64	4.7	6.77	5.83	6.55	6.15	7.84	7.96	5.73	5.85	4.36	1.69	3.11	0.62	5.47	4.5	4.93	1.54	1.48	1.55	8.84	7.73	6.38	8.16	23.29	34.81	39.14	1.73	1.61	1.36	5.13	6.12	5.89	0.45	0.5	0.54	8.64	2.51	7.72	2.08
YBR160W	9.19	4.66	8.83	4.4	16.28	14.46	15.25	13.34	17.29	16.09	12.02	12.91	5.21	0.77	5.56	0.49	11.68	10.07	8.02	1.9	1.93	2.31	14.19	14.72	10.42	11.39	32.74	63.51	66.52	2.46	2.28	2.13	11.29	9.72	12.88	0.42	0.9	0.37	17.54	2.21	18.03	3.33
YBR161W	4.15	3.57	5.48	4.51	19.41	18.01	18.06	15.98	13	14.97	11.02	15.46	3.78	3.11	3.93	2.06	17.16	14.31	13.68	10.86	10.35	12.79	7.84	10.91	5.23	7.89	14.22	29.99	35.29	1.1	1.12	0.93	5.54	5.61	6.7	0.27	0.25	0.22	9.34	4.07	10.85	7.96
YBR162C	19.39	23.67	21.66	22.35	61.6	44.25	56.22	49.82	61.49	59.26	46.8	54.92	19.82	26.76	11.64	10.44	36.52	37.51	42.23	36.95	34.95	38.75	26.72	26.29	22.96	29.5	112.17	150.82	163.23	11.56	10.66	9.8	23.32	24.55	28.84	3.62	3.73	3.95	35.08	32.48	37.96	39.52
YBR162W-A	20.14	13.84	18.6	12.87	20.36	18.61	16.18	17.86	24.77	22.03	23.94	20.09	13.87	8.78	12.17	4.22	20.16	13.75	10.93	11.83	11.37	12.6	32.97	36.51	22.95	40.99	71.41	94.55	86.06	2.77	2.75	2.87	30.53	29.53	34.19	0.92	1.95	0.91	42.58	4.56	48.25	13.39
YBR163W	4.22	3.21	4.59	2.53	13.85	11.58	11.54	9.96	13.43	13.93	10.19	12.8	3.05	0.59	2.92	0.27	6.89	6.88	7.55	1.43	1.79	1.73	5.61	4.89	4.66	5.52	15.45	35.7	40.96	2.91	2.31	2.72	4.89	5	6.62	0.99	1.73	0.91	6.53	1.51	8.07	2.54
YBR164C	6.99	4.85	5.8	3.8	7.24	6.83	5.74	5.19	7.79	7.88	7.12	7.02	3.86	1.19	4	0.78	5.34	5.16	4.83	1.88	1.68	2.09	8.02	8.74	5.05	7.74	26.65	42.13	43.41	1.78	1.6	1.46	7.46	7.89	9.09	0.37	0.55	0.4	9.45	2.31	10.19	2.35
YBR165W	6.59	5.04	6.75	3.7	11.88	11.36	10.03	9.41	12.88	12.81	9.77	11.42	2.96	0.53	4.07	0.38	7.95	6.57	6.78	1.61	1.76	1.62	8.5	8.07	7.16	10.14	20.83	46.95	44.75	3.11	2.53	2.42	7.89	7.19	9.19	0.91	1.19	0.91	8.23	1.28	10.77	3.43
YBR166C	11.09	6.83	11.97	6.91	17.73	16.56	14.53	13.73	18.62	19.84	16.57	19.05	6.63	1.12	7.1	0.83	13	10.2	8.45	2.03	2.52	2.74	15.47	14.59	12.63	17.55	29.08	59.81	55.88	3.93	3.12	3	10.08	11.01	13	0.7	0.83	0.84	12.39	2.71	13.06	2.97
YBR167C	1.81	0.74	1.74	0.37	3.66	2.4	1.94	2.16	3.68	3.49	2.61	3.09	0.87	0.03	0.99	0.01	2.42	1.73	1.13	0.13	0.17	0.17	2.78	2.49	1.99	2.63	5.11	10.77	8.82	0.22	0.16	0.23	1.78	1.88	1.96	0.02	0.05	0.03	3.05	0.26	2.82	0.43
YBR168W	2.54	0.83	2.97	1.09	6.82	6.45	5.89	5.49	5.54	6.15	5.24	5.91	1.77	0.03	1.45	0.04	4.61	4.64	4.86	0.32	0.28	0.28	3.39	2.81	2.81	3.75	10.6	24.52	25.7	0.78	0.64	0.59	2.75	2.79	3.87	0.1	0.17	0.14	4.16	0.97	5.32	0.97
YBR169C	7.44	6.79	10.42	5.14	12.85	11.18	11.97	10.75	9.55	9.64	6.09	6.39	9.01	7.17	4.55	1.76	22.18	18.9	23.32	14.12	11.96	15.45	10.94	12.3	4.68	5.98	31.62	52.34	76.26	2.36	2.17	2.3	7.19	7.66	9.62	0.35	0.52	0.43	11.79	6.82	13.24	8.14
YBR170C	18.11	9.82	18.29	8.83	38.01	29.62	28.99	27.12	34.12	35.53	24.11	30.25	10.24	1.38	10.51	0.71	28.29	26.81	27.73	4.82	5.16	5.11	20.81	17.81	16.33	19.17	54.98	128.47	144.04	5.52	5.11	4.62	19.15	18.71	24.14	0.61	1.4	0.57	29.85	5.34	31.98	6.11
YBR171W	10.96	7.08	10.96	6.5	16.17	13.78	11.86	12.28	17.01	17.18	13.92	13.09	5.74	1.34	5.92	0.71	14.85	11.82	9.81	3.12	3.68	3.93	10.52	8.87	7.78	7.97	29.86	49.28	47.34	1.81	2.21	1.71	10.42	10.84	12.74	0.63	0.77	0.44	14.41	2.38	14.88	4.09
YBR172C	46.16	40.1	54.94	35.01	174.36	139.91	151.67	126.88	151.51	155.66	117.65	136.37	25.95	11.57	25.57	7.03	93.43	92	96.68	31.9	32.76	35.9	63.53	55.95	58.8	69.01	135.98	369.5	378.76	26.1	24.48	24.41	59.06	56.05	69.49	11.28	15.68	12.29	56.75	19.15	67.95	25.07
YBR173C	33.22	20.28	31.52	17.07	53.57	48.35	39.81	43.14	59.25	64.99	51.24	54.42	15.1	1.73	21.94	1.52	54.59	40.67	30.36	8.63	8.85	9.08	47.33	47.94	32.36	50.86	77.83	138.68	139.42	4.1	3.85	4.31	36.25	37.77	45.57	1.41	2.33	1.59	49.44	3.42	53.75	9.47
YBR175W	10.41	6.19	10.16	5.25	17.65	16.18	14.53	14.26	19.53	18.27	16.28	16.95	3.81	0.21	5.58	0.28	15.59	12.43	11.94	1.56	1.66	1.45	7.29	6.29	5.55	7.61	22.17	54.59	55.6	2.06	2.38	2.08	10.67	9.68	12.92	0.44	0.53	0.49	13.68	1.36	17.28	1.59
YBR176W	3.23	1.29	3.74	1.35	3.56	3.33	3.16	2.85	5.37	3.81	3.19	3.14	1.73	0.08	1.38	0.13	2.72	1.98	2.53	0.47	0.41	0.43	5.01	4.71	5.24	6.94	10.94	21.22	20.8	0.47	0.44	0.42	4.16	5.47	5.73	0.16	0.29	0.23	5.59	0.61	5.2	0.68
YBR177C	12.38	14.09	15.86	12.76	15.57	13.91	15.16	14.67	23.87	24.21	19.72	22.67	8.63	7.2	8.36	5.52	16.55	14.45	16.28	11.63	12.3	12.17	18.7	20.8	12.39	18.55	104.1	196	211.19	3.83	3.62	3.16	29.25	37.63	43.14	0.5	1.37	0.75	43.26	20.23	47.62	26.88
YBR179C	22.53	17.65	22.89	14.85	64.29	52.43	49.84	48.19	49.37	58.41	41.87	52.18	9.51	1.66	15.04	2.66	49.77	48.22	45.73	10.5	11	13.61	26.09	24.07	19.63	26.66	80.59	201.87	209.72	7.36	7.15	7.36	31.04	32.53	36.45	1.15	2.71	1.26	33.25	4.07	36.92	7.79
YBR180W	0.14	0.15	0.18	0.06	0.29	0.18	0.2	0.16	0.13	0.16	0.11	0.27	0.05	0.02	0.04	0.05	0.32	0.18	0.21	0.05	0.13	0.04	0.05	0.07	0.04	0.07	0.26	0.56	0.7	0.98	1.11	1.36	0.12	0.11	0.08	0.02	0.02	0.03	0.08	0.2	0.1	0.21
YBR181C	14.55	12.01	14.88	9.98	19.17	19.69	16.32	19.08	17.67	15.58	14.14	17.27	10.18	4.71	9.48	3.56	15.86	12.95	12.86	8.05	9.49	11.46	23.23	24.08	18.64	27.3	64.69	61.42	65.68	4.25	3.29	3.38	16.78	17.22	21.61	1.69	1.74	1.81	24.21	4.03	23.15	6.77
YBR182C	0.37	0.3	0.5	0.22	2.32	2.35	1.8	1.97	2.49	1.89	1.76	1.81	0.3	0.57	0.15	0.16	1.55	1.27	1.29	1.51	1.14	0.91	0.64	0.76	0.82	0.63	2.46	7.96	7.84	0.17	0.24	0.07	0.65	0.81	1.09	0.02	0.05	0.07	1.19	1.41	1.19	2.03
YBR183W	0.78	0.98	1.28	0.82	1.58	1.55	2.12	1.95	1.74	1.52	1.18	1.22	1.97	2.65	0.88	0.81	2.45	2.09	2.3	2.37	2.41	2.96	1.21	1.9	0.68	1.09	6.27	11.98	15.55	0.23	0.32	0.2	0.97	0.82	1.2	0.07	0.07	0.02	3.64	4.29	3.91	7.25
YBR184W	1.12	0.4	1.25	0.43	3.71	3.75	3.36	3.74	1.92	2.5	1.65	1.7	1.15	0.03	0.96	0.04	2.02	1.93	1.67	0.08	0.15	0.19	1.82	1.33	1.1	1.64	7.05	16.48	17.3	0.05	0.09	0.11	1.95	1.68	2.67	0.03	0.1	0.01	2.86	0.11	3.28	0.49
YBR185C	3.76	1.52	3.9	1.72	6.24	5.98	5.51	4.66	6.35	6.23	5.55	5.19	2	0.13	1.82	0.11	4.59	4.48	4.08	0.55	0.51	0.11	4.15	3.57	3.28	3.99	11.2	23.8	19.61	0.67	0.85	0.77	3.81	3.56	4.42	0.05	0.17	0.16	4.29	1.21	5.32	1.02
YBR187W	3.85	2.38	5.14	2.04	9.22	6.9	7.05	5.72	7.16	7.11	5.55	6.87	2.61	0.64	2.75	0.48	5.34	4.16	4.41	1.57	1.35	1.94	6.62	5.99	6.65	6.31	13.47	24.2	25.56	0.59	0.6	0.59	5.06	5.93	6.76	0.09	0.34	0.2	5.18	2.51	5.9	1.75
YBR188C	4.04	1.68	3	1.5	5.21	4.9	3.68	4.87	5.59	5.17	4.31	3.91	1.41	0.25	1.94	0.16	5.23	4.2	3.57	1.12	1.25	1.12	3.29	2.74	2.3	3.17	9.22	15.92	17.02	0.49	0.53	0.48	3.59	3.72	3.93	0.09	0.1	0.12	5.69	0.87	6.68	1.92
YBR189W	38.78	30.49	34.03	25.43	65.26	58.23	53.49	56.27	56.7	56.71	43.61	48.61	22.36	13.79	23.76	8.06	44.17	39.13	36.18	19.18	20.68	23.28	56.46	47.46	38.01	52.58	141.32	136.67	140.96	9.7	9.32	10.15	35	36.46	41.27	4.6	4.37	4.78	37.11	10.36	41.82	12.98
YBR191W	18.34	12.55	16.69	11.26	24.76	21.16	20.15	17.93	26.69	21.92	18.85	21.18	10.33	6.32	9.08	3.99	20.05	14.56	16.56	9.75	10.45	11.52	29	27.87	19.33	27.75	66.81	61.42	55.46	4.2	4.13	3.92	11.63	13.33	14.89	1.42	1.49	1.32	16.08	3.94	15.86	4.43
YBR192W	7.89	4.86	9.19	4.13	14.93	11.56	13.68	11.14	14.97	12.12	10.6	12.13	4.61	0.58	3.94	0.25	11.02	7.93	10.46	1.7	1.87	1.9	11.25	9.83	9.95	11.3	26.24	52.1	60.43	3.9	3.24	3.02	8.62	8.86	10.63	0.9	1.66	1.36	10.63	2.25	12.54	3.11
YBR193C	3.88	1.58	3.76	1.4	9.59	8.08	8.41	7.23	8.72	9.8	7.23	7.4	2.27	0.08	2.25	0.1	7.13	5.84	4.6	0.68	0.7	0.69	4.9	4.09	3.21	4.57	12.84	23.88	24.23	0.34	0.55	0.37	4.69	5.56	5.41	0.08	0.07	0.12	6.53	0.76	5.85	1.08
YBR194W	1.82	0.75	1.54	0.71	2.79	2.73	2.26	2.25	3.45	3.2	3.08	2.95	1.12	0.18	1.04	0.05	2.3	1.98	1.36	0.29	0.23	0.3	2.73	2.61	1.55	1.84	6.31	10.69	14.64	0.64	0.78	0.61	2.18	2.39	2.81	0.24	0.3	0.34	4.05	0.71	5.17	0.86
YBR195C	5.29	3.42	5.63	2.88	11.27	10.96	9.97	9.8	10.43	12.04	8.7	11.36	3.36	0.67	3.34	0.74	8.55	7.45	7.62	1.64	1.86	2.31	5.93	5.88	4.96	5.53	16.95	32.88	34.73	2.32	1.73	1.77	5.85	5.91	6.93	0.58	0.83	0.69	7.04	0.93	8.27	1.6
YBR196C	31.32	41.15	43.72	42.23	125.45	96.63	105.01	98.77	117.31	127.72	91.51	110.27	48.78	70.56	21.07	20.2	98.43	93.02	92.84	108.64	90.17	107.8	48.68	45.56	41.39	43.68	315.3	379.47	402.36	23.18	23.07	23.44	60.54	65.17	73.92	9.91	11.38	10.58	80.9	108.73	81.72	88.4
YBR196C-B	0.2	0.22	0.26	0.27	0.42	0.35	0.43	0.34	0.63	0.59	0.62	0.51	0.26	0.54	0.15	0.19	0.36	0.25	0.52	0.45	0.55	0.47	0.34	0.3	0.18	0.22	0.56	0.72	0.63	0.07	0.12	0.17	0.19	0.14	0.2	0.05	0.06	0.08	0.24	0.26	0.23	0.22
YBR197C	7.1	3.02	6.32	2.55	14.59	14.13	11.95	12.12	17.39	17.98	15.17	16.23	2.93	0.4	3.7	0.18	11.68	9.02	6.36	0.96	0.83	0.93	9.8	9.72	6.14	9	18.74	40.92	42.43	2.16	1.42	1.98	6.82	7.61	10.37	0.83	0.87	0.99	6.72	0.5	7.42	1.35
YBR198C	65.88	62.09	68.09	50.12	142.33	117.32	119.86	109.61	134.83	142.58	114.82	136.98	34.12	16.46	40.06	9.1	103.13	99.11	91.52	32.65	34.26	39.65	66.89	56.74	50.59	57.56	197.2	485.75	527.84	30.54	29.73	29.07	79.71	78.71	98.43	11.43	16.83	11.58	89.3	29.17	96.8	43.87
YBR199W	30.45	27.31	35.71	24.56	39.74	36.3	38.56	35.89	46.19	44.51	34.91	38.58	26.49	16.24	21.45	6.43	40.37	33.2	34.46	17.44	18.06	19.2	37.47	38.62	23.16	32.17	116.91	214.41	232.55	17.12	16.5	14.5	37.65	42.07	53.37	6.36	6.42	6.32	55.83	13.57	61.94	19.72
YBR200W	15.48	10.69	17.03	7.85	36.95	31.37	30.12	23.63	40.52	40.97	29.94	39.27	9.18	1.18	8.12	0.58	24.82	23.97	26.11	2.9	3.48	3.41	20.02	16.64	15.38	17.63	71.85	157.09	179.33	9.63	8.94	8.1	22.86	23.5	27.54	2.89	3.78	3.4	31.12	4.44	31.8	4.74
YBR201C-A	0.79	0.51	0.74	0.36	1	0.95	0.81	0.9	1.69	1.76	1.2	1.49	0.57	0.26	0.39	0.08	0.92	0.5	0.4	0.47	0.28	0.43	0.77	0.92	0.39	0.84	2.2	4.26	5.04	0.16	0.11	0.1	0.49	0.47	0.67	0.02	0.01	0.02	0.94	0.24	1.08	0.59
YBR201W	2.74	1.62	3.04	1.71	5.35	4.55	3.28	3.79	4.89	4.74	3.79	3.22	1.88	0.68	1.38	0.36	4.28	3.23	3.57	1.44	1.21	1.38	2.43	2.56	2.25	2.71	9.48	21.55	26.61	0.5	0.52	0.42	4.28	4.14	4.98	0.07	0.09	0.04	5.86	0.95	7.36	1.51
YBR202W	32.26	20.87	36.39	18.92	92.29	78.9	80.92	72.87	88.89	89.55	71.03	86.93	20.8	6.9	21.79	3.25	49.83	53.33	50.21	12.4	13.99	13.87	51.49	50.05	39.43	49.44	107.2	246.73	272.53	11.4	12.29	11.57	34.16	30.2	41.58	2.57	3.22	2.59	60.1	19.28	65.83	20.34
YBR203W	2.21	3.58	2.78	2.64	12.85	10.03	12.03	12.74	11.19	14.6	8.48	10.88	4.39	5.48	1.43	1.04	8.47	8.68	10.14	8.84	8.4	10.57	1.88	3.07	1.56	3.26	25.68	54.51	72.4	2.71	2.41	1.87	2.01	1.4	2.35	0.1	0.12	0.1	12.25	14.65	12.16	17.77
YBR204C	2.76	1.8	2.98	1.27	4.77	3.95	4	3.58	4.49	3.73	3.17	3.73	2.21	0.13	1.8	0.1	3.91	3.79	4.5	0.36	0.39	0.37	2.89	2.68	1.45	2.32	13.21	22.51	29.27	0.48	0.61	0.5	3.59	3.82	4.54	0.05	0.1	0.05	4.8	0.71	6.63	0.94
YBR205W	6.39	4.01	6.98	3.15	8.3	8.56	7.48	6.29	9.73	10.95	8.74	10.19	4.16	0.17	3.51	0.15	6.57	5.54	5	0.67	0.86	1.04	8.03	8.11	4.44	7.86	26.8	41.56	38.37	1.48	1.4	1.37	8.57	9.03	11.1	0.68	0.51	0.51	10.47	0.93	10.92	1.51
YBR207W	15.51	10.95	16.4	9.43	33.53	26.74	24.56	26.17	32.91	31.83	26.93	30.97	8.85	2.71	9.03	2.1	23.44	22.13	21.04	7.51	8.61	9.84	19.76	18.15	16.5	22.04	65.21	130.08	159.58	4.58	3.51	3.96	39.33	35.3	48.57	1.98	3.18	2.03	51.95	6.95	57.76	8.54
YBR208C	3.72	4.03	4.67	3.74	17.86	14.73	16	14.3	30.14	22.83	19.43	30.31	5.44	7.53	2.32	1.45	7.87	8.23	10.06	6.25	7.28	7.31	4.08	4.78	3.23	3.92	102.61	159.59	215.32	7.91	6.11	6.79	9.86	6.49	11.63	0.92	1.1	0.79	18.78	47.13	21.36	45.44
YBR210W	5.39	3.26	5.3	2.57	6.43	5.9	4.99	5.3	7.96	7.8	6.49	7.96	2.6	0.18	3.17	0.14	5.64	5.11	4.2	0.47	0.55	0.71	7.07	7.48	4.57	8.76	21.39	36.34	37.11	0.98	0.84	1.05	6.51	6.75	8.04	0.16	0.31	0.13	8.53	0.95	10.82	2.03
YBR211C	5.37	4.16	5.94	3.14	11.01	10.18	10.03	9.07	12.3	12.89	9.99	10.46	2.26	0.36	3.15	0.28	9.31	7.54	7.09	1.28	1.61	1.83	5.88	5.01	4.38	5.38	15.45	35.94	36.13	2.67	2.65	2.67	6.85	5.58	7.68	0.76	0.78	0.63	7.8	0.89	9.36	1.75
YBR212W	17.24	11.9	21.75	10.01	52.44	41.42	44.07	37.81	52.6	55.69	43.01	45.77	15.73	3.68	12.06	1.5	37.56	35.4	40.35	8.54	8.3	9.23	28.37	24.92	22.24	23.97	77.56	165.29	187.17	7.13	7.15	6.36	27.53	27.18	33.78	1.97	3.97	2.56	34.06	9.26	34.73	11.44
YBR213W	8.62	5.24	6.54	3.3	10.59	9.51	7.86	8.82	10.64	9.86	8.74	7.58	1.61	0.18	3.91	0.92	10.08	7.34	7.11	4.64	3.27	2.87	13.34	7.68	12.64	11.12	17.17	35.45	30.53	0.47	0.41	0.49	7.38	8.58	8.02	0.1	0.21	0.04	5.78	0.91	6.58	0.67
YBR214W	10.73	9.08	14.6	8.5	33.82	31.02	33.02	33.18	30.77	37.13	24.87	26.05	24.37	25.6	12.55	5.31	46.04	39.74	36.32	34.79	29.05	34.3	16.63	22.61	7.76	10.24	75.59	152.99	189.21	4.64	4.91	3.72	25.39	25.11	34.06	0.9	1.42	1.2	49.44	11.62	59.67	26.15
YBR215W	17.87	10.5	20.13	8.3	55.02	47.65	46.74	38.62	48.66	54.39	40.82	47.76	10.54	0.62	9.47	0.35	37.01	33.15	34.04	2.9	3.16	3.08	19.49	13.92	15.3	15.61	72.41	174.3	180.73	4.29	4.3	4.28	25.56	25.64	29.33	0.61	1.13	0.84	30.25	4.56	32.23	6.87
YBR216C	10.51	6.06	12.09	5.78	17.96	14.03	15.42	14.1	14.79	16.67	11.8	15.01	6.05	0.39	6.51	0.29	12.48	12.18	11.92	1.31	1.89	1.25	13.03	11.16	9.24	11.38	33.18	69.62	79.34	2.91	2.55	2.27	10.18	10.17	13.12	0.79	0.97	0.85	12.79	3.24	15.08	3.93
YBR217W	2.17	1.09	2.52	1.11	3.95	3.38	2.99	2.89	4.03	3.92	2.99	3.3	1.1	0.1	1.29	0.05	2.89	2.27	2.53	0.34	0.39	0.43	2.38	2.84	2.39	2.69	6.68	14.71	14.49	0.73	0.78	0.67	2.57	2.28	2.82	0.14	0.11	0.1	3.27	0.65	3.61	0.81
YBR218C	12.57	14.37	16.5	13.76	55.6	38.42	51.55	44.96	64.09	64.75	54.16	64.39	19.38	23.67	9.52	7.36	30.43	30.24	37.19	25.56	25.52	31.84	22.69	20.17	22.84	26.3	153.37	236.6	257.41	12.2	12.6	11.59	27.53	27.48	33.74	3.22	2.81	3.12	36.22	43.3	40.41	34.57
YBR220C	3.29	1.9	4.02	1.45	10.14	8.53	9.51	8.13	10.46	9.56	7.45	8.7	2.03	0.14	1.44	0.05	6.04	6.54	6.12	0.8	0.61	0.78	2.75	2.67	2.62	2.83	17.8	30.63	38.79	0.79	0.44	0.67	4.37	4.81	5.79	0.05	0.13	0.09	6.72	0.84	5.95	0.9
YBR221C	8.98	5.71	9.5	5.09	25.49	18.89	20.38	20.57	22.28	24.26	17.58	23.04	6.27	1.64	4.69	0.64	17.65	15.91	15.63	3.13	3.03	3.41	14.69	13.74	11.07	14.89	67.3	65.92	77.03	6.95	6.89	6.67	12.75	13.14	15.03	2.14	2.47	2.04	17.35	6.56	18.59	5.77
YBR222C	6.45	7.7	8.18	6.73	19.57	17.01	17.31	15.87	19.56	20.38	14.48	18.01	8.86	7.44	4.69	2.79	13.85	13.09	14.29	8.79	9	8.82	7.12	7.73	5.42	8.27	41.66	72.2	78.99	2.85	2.7	2.81	6.71	5.95	7.07	0.26	0.45	0.15	12.33	8.39	13.54	9.2
YBR223C	6.95	4.2	7.76	4.07	17.88	14.91	15.86	13.13	19.15	19.63	13.59	17.72	3.74	0.48	4.49	0.59	12.36	11.79	11.59	2.58	3.03	3.39	6.73	7.82	5.26	5.95	26.76	61.58	65.61	1.9	1.83	1.37	8.57	8.58	10.86	0.21	0.42	0.18	10.55	1.47	11.73	3.51
YBR225W	13.39	8.71	18.33	8.89	52.46	43.53	46.04	42.11	48.64	51.89	38.32	45.08	9.58	0.94	8.84	0.54	33.84	36.1	38.34	5.78	5.28	6.54	19.68	18.86	16.12	19.14	57.71	140.85	152.65	7.51	6.14	5.65	20.4	18.13	24.97	1.18	2.1	0.99	23.53	5	28.68	8.54
YBR227C	12.35	5.44	13.41	4.61	28.89	23.11	24.41	19.93	31.45	32.26	22.6	25.44	7.41	0.25	6.87	0.18	17.78	17.86	19.61	1.4	1.37	1.51	13.51	9.46	11.21	10.39	53.49	111.27	110.57	3.09	3.2	2.44	19.41	21.68	22.32	0.78	1.19	0.87	23.77	3.4	24.79	3.14
YBR228W	4.54	2.05	4.39	1.89	7.64	7.8	5.6	7.48	9.12	9.48	7.07	7.08	2.37	0.12	3.13	0.12	5.04	4.86	4.25	0.49	0.59	0.6	4.9	3.93	3.68	4.22	13.1	31.19	34.24	1.07	0.92	0.94	5.34	5.66	7.31	0.27	0.49	0.3	8.23	1.12	7.82	1.14
YBR229C	11.19	7.29	14.24	7.67	30.66	24.04	25.54	24.29	25.3	26.8	18.36	23.02	9.94	1.16	6.89	0.48	22.71	21.99	24.49	2.79	2.85	2.87	9.38	7.59	7.49	8.25	61.85	105.88	130.95	3.94	3.8	3.58	14.45	13.84	18.61	1.04	1.24	0.92	19.11	3.9	21.56	5.33
YBR230C	7.61	9.91	6.11	6.64	8.35	8.86	7.65	7.85	8.52	8.42	7.52	8.25	14.68	20.77	7.95	6.95	12.82	9.27	8.84	17.83	14.93	17.47	8.47	13.7	4.43	8.66	25.01	40.2	39.63	0.67	0.76	0.71	7.46	6.12	8.22	0.1	0.27	0.12	22.32	4.35	24.74	18.18
YBR230W-A	2	1.43	2.04	1.06	1.45	1.28	1.28	1.1	1.26	1.23	0.76	0.98	1.81	0.63	1.31	0.28	1.43	1.32	1.01	0.42	0.45	0.58	2.19	4.39	1.64	3.01	15.6	17.37	22.2	1.13	1.01	1.1	4.23	3.45	5.53	0.31	0.62	0.4	12.14	1.88	13.19	6.81
YBR231C	13.85	7.7	13	6.19	16.01	15.76	13.68	13.52	19.86	18.72	14.72	13.44	5.78	0.58	7.77	0.35	15.76	10.72	8.84	2.03	2.21	1.81	15.91	14.77	9.86	13.32	38.26	79.59	83.4	2.22	2.51	2.04	17.03	16.29	20.33	0.28	0.34	0.13	22.51	1.84	25.6	2.76
YBR233W	10.18	6.77	10.98	5.15	27.1	24.39	23.19	21.21	26.11	24.03	20.05	21.93	8.8	2.03	7.4	0.72	19.57	17.04	16.92	4.59	4.31	4.92	13.69	12.83	9.92	12.83	38.26	83.85	97.82	3.01	2.82	2.42	15.48	14.2	18.94	0.55	1.15	0.37	23.96	2.66	29.26	4.84
YBR233W-A	8.59	4.28	7.65	3.2	8.4	8.25	6.87	6.36	8.04	9.11	8.79	6.81	4.88	0.22	5.15	0.14	8.89	5.23	4.43	0.49	0.61	0.5	8.37	8.09	6.57	9.1	21.72	44.78	37.88	0.81	1.08	0.98	11	9.96	12.62	0.19	0.34	0.23	16.22	0.58	18.49	1.44
YBR234C	6.52	4.62	6.87	4.49	12.06	10.36	9.07	9.94	12	13.05	9.41	9.66	5.23	0.93	4.17	0.42	12.4	9.95	8.82	2.53	2.54	2.46	8.24	8.09	5.09	6.79	30.05	41.32	49.44	3.09	2.71	2.66	6.93	7.75	8.93	0.9	0.95	0.77	9.42	1.62	10.06	2
YBR235W	9.58	6.56	11.47	6.31	29.74	23.54	25.6	20.62	27.62	28.29	22.11	28.82	7.6	0.48	5.45	0.26	17.8	19.61	20.32	1.95	1.8	1.96	10.23	8.71	8.43	9.37	45.5	98.97	105.25	2.27	2.43	1.87	14.84	14.13	19.52	0.52	1.47	0.64	20.51	4.26	22.25	5.35
YBR236C	8.13	6.03	7.98	4.54	11.77	10.01	10.81	9.83	12.68	12.52	9.41	11.76	4.7	1.34	3.94	0.76	8.98	8.23	7.2	2.79	2.73	2.59	9.19	7.22	6.18	7.53	34.71	65.04	64.35	4.14	4.21	3.8	10.13	11.35	12.13	1.04	1.15	0.91	13.82	4.39	14.48	5.41
YBR237W	15.45	11.99	18.69	9.32	39.14	31.87	32.7	29.25	32.81	38.14	26.12	30.63	9.11	1.17	9.21	0.53	26.67	26.7	28.41	3.55	3.87	4.72	16.58	13.26	13.38	15.4	62.15	146.8	167.57	8.01	8.6	7.78	24.08	21.54	25.23	2.76	4.24	2.28	26.23	6.45	27.67	5.98
YBR238C	32.23	31.05	35.71	32.06	171.43	131.33	121.05	116.31	141.41	178.67	129.94	174.18	24.89	26.52	17.01	6.82	81.82	97.57	66.37	49.93	54.47	59.84	44.3	34.98	27.38	30.8	85.33	170.84	189.49	8.93	8.51	8.22	15.82	17.62	21.02	2.41	2.86	2.45	26.45	2.6	31.05	4.09
YBR239C	7.4	5.24	7.14	3.98	34.16	34.77	26.65	24.96	40.3	45.47	32.19	40.18	3.83	0.24	4.35	0.16	17.99	20	17.36	1.87	1.89	1.94	7.87	6.7	6.8	7.51	24.08	63.83	60.01	5.41	5.07	5.2	8.74	6.84	9.68	2.39	2.21	2.04	8.72	1	14.05	2.3
YBR241C	1.29	0.73	1.46	0.52	6.43	5.38	4.73	4.73	4.99	5.06	4.06	3.11	0.99	0.12	0.83	0.05	4.76	3.93	4.2	0.68	0.62	0.84	2.01	2.06	1.93	2.05	9.67	18.41	24.16	0.37	0.18	0.25	3.2	3	3.71	0.07	0.2	0.07	4.59	1.17	5.07	1.38
YBR242W	4.98	2.8	5.26	2.34	11.61	10.73	7.51	8.68	12.32	12.6	10.6	12.37	2.71	0.69	2.92	0.34	8.64	7.29	5.68	1.59	1.77	2.33	6.56	5.46	6.31	7.77	15.34	28.06	28.78	0.96	0.6	0.72	5.18	5.14	5.91	0.13	0.23	0.09	6.4	0.65	5.55	1.13
YBR243C	8.6	9.64	9.93	8.2	18.99	15.63	13.71	16.85	15.9	17.18	15.19	15.49	3.16	0.74	7.51	4.06	21.08	20.7	17.88	11.93	12.16	14.65	9.64	9.42	11.01	13.01	22.96	44.94	50.14	1.05	1	0.93	9.3	10.38	11.18	0.18	0.57	0.26	11.15	3.05	12.51	3.66
YBR244W	172.29	189.72	168.83	168.36	72.72	65.66	72.66	60.32	64.77	73.33	82.23	92.73	14.79	20.55	121.69	91.8	129.65	102.91	92.02	105.72	114.13	120.61	210.93	200.32	134.64	207.36	204.36	403.1	387.93	7.82	7.07	7.61	128.31	158.01	146.28	3.32	7.42	2.64	125.19	33.34	119.75	46.44
YBR245C	21.5	11.88	24.57	11.3	55.23	44.85	51.03	41.03	46.14	47.09	35.25	43.4	16.77	1.96	11.06	0.85	29.29	34.47	36.25	3.16	4.16	3.93	32.52	26.23	26.08	29.98	110.45	217.95	237.52	6.71	6.58	6.45	28.08	28.62	36.62	1.84	2.96	1.85	40.13	9.33	39.22	7.38
YBR246W	8.34	4.75	8.27	3.86	16.59	16.23	15.92	14.12	19.23	21.15	15.99	19.11	3.82	0.33	4.47	0.21	12.06	11.77	9.1	1.2	1.52	1.08	10.8	9.17	7.14	8.45	24.6	47.84	49.23	2.55	2.66	2.27	8.46	8.58	9.64	0.69	0.92	0.9	9.77	2.1	11.55	2
YBR247C	24.19	12.83	23.28	10.12	56.97	47.4	48.65	39.74	53.05	58.31	47.56	50.98	9.53	1.38	11.85	0.91	30.03	27.67	24.19	3.49	4.07	4.06	30.98	22.48	30.58	33.58	46.21	108.13	101.6	4.48	4.32	3.42	19.72	24.53	24.85	1.7	2.51	1.8	23.21	3.16	20.13	2.11
YBR248C	12.6	9.48	15.44	8.48	53.23	33.37	40.48	37.36	47.03	45.33	39.35	48.24	9.71	3.66	9.57	3.24	22.39	19.81	23.48	9.14	9.54	12.51	22.01	15.98	33.25	30.66	76.41	153.07	189	7.82	7.28	7.63	23.59	26.6	30.38	2.09	6.46	2.63	32.19	16.64	29.06	12.12
YBR249C	15.43	14.89	15.32	12.51	48.38	37.5	39.49	39.95	52.09	55.96	54.25	63.28	13.34	14.51	17.01	10.28	20.71	16.34	16.49	19.5	18.09	25.65	25.37	23.55	26.79	36.84	72.23	76.21	76.68	7.75	6.97	7.16	16.33	17.87	19.77	3.27	7.19	3.82	29.25	13.41	28.7	13.42
YBR250W	0.2	0.11	0.2	0.12	2.16	1.95	1.74	1.54	1.31	1.44	1.38	1.46	0.11	0.18	0.1	0.06	0.64	0.73	0.84	0.29	0.27	0.32	0.1	0.11	0.16	0.24	1.53	2.57	3.15	0.44	0.36	0.43	0.24	0.16	0.47	0.03	0.04	0.04	0.27	0.2	0.55	0.19
YBR251W	12.17	8.46	11.98	7.12	21.44	18.09	16.7	16.03	21.87	22.21	17.02	18.87	6.44	0.36	6.65	0.34	16.74	13.75	13.21	2.14	2.49	2.24	11.65	10.27	8.04	10.14	28.93	59.98	59.87	2.47	2.46	2.05	12.56	12.08	15.55	0.61	0.89	0.62	15.52	4.44	16.29	4.38
YBR252W	5.08	3.42	4.67	3.21	5.64	5.23	5.04	4.98	7.54	6.1	7	5.88	3.78	2.08	3.48	1.32	4.98	3.82	3.57	2.61	2.76	2.48	8.23	7.11	5.73	8.34	14.56	20.02	23.11	0.26	0.38	0.3	7.87	7.79	9.24	0.16	0.13	0.11	9.88	1.3	11	1.73
YBR253W	5.47	3.89	6.26	3.64	7.95	6.18	5.71	6.31	10.48	10.07	8.81	7.24	3.19	0.4	3.57	0.38	7.51	5.77	5.94	1.95	1.85	1.66	8.26	7.16	5.68	8.16	17.99	35.13	38.3	1.83	1.97	1.86	8.96	9.19	10.71	0.81	0.83	0.65	11.2	2.06	11	2.3
YBR254C	5.24	2.72	4.71	2.26	5.45	5.3	4.44	3.83	6.58	6.98	5.4	5.96	1.78	0.09	2.58	0.19	4.93	3.91	3.19	0.94	0.59	0.91	7.02	6.77	6.42	9.04	9.48	18.89	15.2	0.9	0.62	0.56	4.45	5.28	5.69	0.17	0.3	0.24	4.53	0.61	5.27	0.92
YBR255C-A	2.61	1.99	2.47	1.97	3.66	4.25	2.64	3.15	5.17	5.57	5.2	3.94	1.39	0.23	1.64	0.28	3.59	2.86	2.21	1.27	1.07	1.23	2.54	3.23	1.5	2.96	5.64	7.96	9.87	0.51	0.54	0.61	2.11	2.56	2.33	0.29	0.31	0.27	3.43	0.71	3.25	1.29
YBR255W	15.91	9.74	19.2	8.61	37.14	29.24	27.83	28.15	34.35	37.29	26.23	33.31	6.7	0.34	10.98	0.75	25.31	22.34	25.13	3.07	3.73	3.13	23.22	19.25	22.17	25.62	61.74	135.47	145.02	6.12	6.26	5.91	22.06	24.66	28.39	1.45	2.21	1.6	25.58	4.54	28.5	5.22
YBR256C	14.03	13.95	14.39	13.07	19.07	16.78	17.6	17.75	23.64	24.93	25.25	30.57	6.36	5.67	11.56	9.73	14.91	11.57	10.51	15.4	17.19	20.41	25.26	25.68	24.3	38.69	44.61	73.4	78.01	4.04	3.95	3.81	18.83	20.64	22.32	1.23	1.77	1.44	25.02	11.83	27.37	14.82
YBR257W	8.53	4.98	8.87	4.03	13.27	11.71	11.66	10.58	13.63	12.65	11.69	13.01	3.05	0.28	4.57	0.29	9.48	7.98	7.41	1.49	1.69	0.97	10.09	8.16	9.83	13.63	20.64	46.95	42.5	1.17	1.16	1.29	8.77	8.79	10.9	0.49	0.83	0.55	10.09	1.28	9.69	2.67
YBR258C	10.53	5.63	11.62	4.49	13.06	12.73	9.83	11.07	13.1	14.09	12.27	12.13	4.04	0.53	6.27	0.51	12.42	8.84	7.6	1.31	1.69	1.77	14.67	15.52	14.14	19.26	29.41	75.89	66.94	1.54	1.79	1.61	14.67	16.08	19.67	0.25	0.44	0.3	22.16	3.98	26.58	4.33
YBR259W	4.31	2.32	4.78	2.29	11.8	11.26	10.41	9.16	11.24	12.25	8.52	11.1	2.03	0.07	2.22	0.13	8.14	7.98	7.88	0.75	0.72	0.73	5.24	3.7	4.41	5.44	15.49	34.65	36.97	1.17	0.64	0.88	4.13	4.45	5.29	0.28	0.34	0.24	5.78	1.04	6.78	1.16
YBR260C	10.71	6.79	13.01	5.67	47.91	40.35	39.72	34.53	41.1	46.93	32.9	37.36	8.43	0.82	5.73	0.41	33.71	33.9	30.12	4.09	3.61	4.21	12.74	10.38	11.31	11.51	62.3	139.97	150.34	3.23	3.07	3.3	18.24	21.38	25.48	0.56	1.47	0.65	26.42	4.26	28.05	6.04
YBR261C	4.38	2.1	4.95	1.7	8.09	6.88	5.45	6.86	11.32	9.75	8.48	7.34	2.65	0.14	2.58	0.13	6.68	4.82	4.2	0.71	0.85	0.56	6.01	4.21	4.38	5.2	14.26	25	24.79	0.54	0.68	0.41	6.75	7.66	8.08	0.15	0.31	0.13	7.99	0.71	8.17	0.95
YBR262C	18.6	9.21	17.43	7.37	10.88	10.73	9.89	10.17	16.23	16.43	14.46	13.97	6.65	0.58	9.71	0.49	12.02	7.38	5.42	1.69	1.89	1.55	26.7	28.97	18.3	32.23	25.38	47.11	37.32	1.62	1.52	1.27	13.85	14.08	17.66	0.85	0.63	0.73	16.14	3.22	19.27	4.27
YBR263W	11.35	6.79	10.98	5.24	26.21	22.34	21.92	19.63	27.04	28.45	23.07	26.66	5.57	1.65	5.49	0.96	16.48	15.11	13.87	2.89	3.58	3.02	12.69	10.75	11.54	13.01	64.01	75.57	75.21	6.06	5.34	5.89	13.5	14.85	15.59	1.76	1.93	1.74	14.3	3.31	15.46	3.3
YBR264C	7.55	3.34	7.11	2.84	7.85	6.85	6.38	6.02	10.48	9.56	7.87	7.98	4.15	0.24	4.49	0.16	8.19	5.32	3.52	0.8	0.72	0.69	8.37	7.64	5.91	8.66	21.35	40.84	36.97	0.95	0.98	1.01	8.97	7.87	11.2	0.18	0.31	0.34	12.74	1.92	14.83	2.16
YBR265W	10.96	5.86	10.71	5.39	17.36	15.18	13.89	13.89	21.52	20.64	17.18	17.08	6.6	0.33	6.21	0.32	12.19	10.22	9.76	1.28	1.21	1.62	13.69	10.84	10.8	12.05	29.15	63.59	63.02	1.51	1.2	1.32	12.1	13.22	16.06	0.57	0.95	0.54	15.17	1.95	17.38	2.28
YBR267W	54.32	23.27	49.81	20.14	107.25	85.75	73.93	70.97	114.97	107.9	99.07	101.33	16.47	1.34	28.3	1.81	56.02	46.19	42.3	5.66	6.34	6	74.95	53.93	67.02	85.64	79.92	189.41	180.87	5.52	5.25	5.29	41.35	44.61	51.04	1.86	2.93	2.32	49.3	2.45	44.82	2.63
YBR268W	13.31	7.64	12.13	6.21	9.48	9.23	7.6	8.79	13.71	10.76	10.66	9.85	5.21	0.58	7.15	0.54	10.55	7.11	5.84	1.57	1.61	1.21	12.93	13.46	10.09	13.68	23.96	39.39	48.25	1.32	1.15	1.07	13.44	13.61	16.69	0.46	0.55	0.38	19.54	2.23	20.81	3
YBR269C	7.84	5.43	8.06	4.17	8.3	8.13	6.49	8.31	10.06	8.68	7.52	8.41	6.05	1.83	5.73	0.89	10.1	6.79	5.42	3.15	2.66	2.96	11.87	12.41	6.51	9.67	21.69	39.96	43.41	1.25	1.37	1.23	10.52	12.49	14.7	0.26	0.44	0.24	19.38	1.32	21.64	2.7
YBR270C	3.4	2.2	4.08	1.61	11.8	12.33	10.55	9.09	11.79	13.18	8.52	10.88	2	0.08	2.16	0.06	8.42	7.84	7.44	0.39	0.56	0.41	2.09	2.2	1.94	2.53	13.14	31.11	31.72	0.54	0.38	0.49	3.31	2.88	4.48	0.05	0.19	0.1	4.16	0.8	5.95	1.08
YBR271W	5.33	2.88	5.42	2.42	12.77	10.26	9.77	7.99	13.23	11.4	10.19	9.71	2.53	0.15	2.23	0.16	6.12	5.93	7.27	0.41	0.55	0.73	5.99	3.57	6.03	5.43	17.06	35.21	31.3	1.21	1.08	1.4	6.05	6.68	7.27	0.32	0.46	0.38	7.31	0.78	7.29	0.86
YBR272C	4.75	2.1	5.36	1.99	7.98	6.95	8	6.47	7.96	8.18	5.84	7.8	2.97	0.2	2.5	0.11	5.45	5.29	4.72	0.8	0.52	0.58	4.88	4.37	3.25	3.9	15.98	35.94	35.57	0.99	1.04	0.84	4.39	5.26	5.69	0.17	0.21	0.12	8.1	1.69	9.51	1.35
YBR273C	8.4	4.4	9	3.77	14.27	11.46	11.48	10.52	16.41	15.5	12.47	13.14	5.8	0.29	4.63	0.18	12.17	9.25	9.2	1.36	1.04	0.73	9.54	7.59	7.55	7.65	30.65	64.96	61.48	2.07	1.66	1.45	12.12	12	13.85	0.36	0.49	0.43	15.65	3.22	16.7	2.6
YBR274W	2.08	0.98	2.55	1.05	4.61	2.78	3.19	2.96	5.22	4.82	3.1	3.11	1.37	0.05	0.97	0.06	2.49	2.41	2.42	0.19	0.2	0.22	2.3	2.04	1.82	1.88	13.44	26.37	27.24	0.57	0.29	0.56	2.35	2.67	3.26	0.06	0.06	0.04	3.51	0.67	4.21	0.84
YBR275C	20.94	10.4	25.46	10.12	71.72	53.21	61.93	51.77	49.55	49.28	38.93	47.74	15.77	1.87	11.65	0.94	32.67	35.47	37.54	3.41	4.87	5.57	27.44	22.36	23.16	24.2	98.54	202.36	220.3	5.46	5.77	5.51	29.22	29.3	36.5	0.87	2.11	1.16	40.4	4.31	38.84	4.66
YBR276C	6.97	3.54	9.16	3.38	23.91	18.21	17.4	18.16	18.04	19.04	13.79	16.63	5.3	0.53	3.64	0.29	15.42	14.41	14.03	1.61	2.13	2.18	8.79	7.18	7.32	7.71	38.11	73.72	80.53	2.6	2.81	2.13	9.77	8.65	11.77	0.34	0.65	0.44	12.76	2.62	14.63	3.24
YBR278W	2.76	1.23	2.63	0.84	3.95	5.05	3.65	4.06	6.07	5.59	4.42	4.74	1.75	0.12	1.64	0.11	3.64	2.98	2.25	0.54	0.44	0.52	3.1	3.18	2.47	3.29	8.51	17.2	16.32	0.42	0.39	0.47	3.4	3.51	3.85	0.06	0.06	0.12	6.07	0.61	6.23	0.67
YBR279W	45.11	36	52.51	29.98	88.55	68.99	74.6	67.96	85.89	86.11	68.75	69.9	30.16	7.38	27.48	3.88	63.34	52.94	58.49	16.44	14.68	15.88	57.44	48.45	48.68	55.3	160.69	340.15	376.87	18.74	18.18	16.78	61.87	66.66	77.63	5.92	8.94	6.07	81.09	25.17	82.17	26.88
YBR280C	3.22	1.4	4.05	1.16	6.64	6.75	5.74	6.02	5.75	6.05	3.7	4.2	2.45	0.38	2.47	0.21	5.76	5.88	6.17	0.99	1.03	1.27	3.04	3.29	2.17	2.23	18.22	40.68	42.43	0.4	0.43	0.44	5.37	5.73	7.66	0.15	0.11	0.07	9.23	1.26	10.16	1.11
YBR281C	17.44	11.74	18.93	10.48	25.81	19.29	20.56	19.4	21.04	20.56	13.67	16.47	5.2	1	7.66	1.87	14.67	14.5	17.03	3.29	3.07	3.32	25.64	19.84	18.08	20.56	27.02	59.98	64.07	1.69	1.91	1.61	14.04	10.82	11.83	0.45	0.7	0.42	11.77	1.8	10.52	1.7
YBR282W	9.52	6.95	8.87	5.07	7.87	8.3	7.16	6.22	11.64	9.7	8.32	8.36	5.12	0.74	5.26	0.49	8.64	6.2	5.65	2.03	1.56	1.6	8.07	6.75	5.31	7.01	20.08	37.71	46.85	1.54	1.75	1.29	9.89	9.93	12.35	0.5	0.68	0.39	12.17	1.43	14.25	2.71
YBR283C	10.27	6.4	12.54	5.3	29.63	20.11	23.89	20.02	26.69	26.8	19.97	21.55	7.86	2.31	4.71	0.86	16.63	15.45	17.88	3.68	4.79	4.42	16.15	13.79	14.15	15.86	46.32	65.76	75.49	3.36	2.73	2.68	10.61	10.8	13.63	1.07	1.53	1.2	13.92	6.75	13.75	5.46
YBR284W	0.62	0.54	0.62	0.55	2.03	2.13	1.54	1.74	2.47	2.29	1.38	1.62	0.66	0.34	0.32	0.05	1.42	1.11	1.41	0.68	0.92	0.65	0.31	0.23	0.27	0.21	3.84	6.35	10.43	1.13	0.99	1.11	0.49	0.54	0.85	0.12	0.2	0.15	1.38	0.24	1.66	0.51
YBR286W	38.56	39.11	46.11	35.08	94.5	76.47	81.56	75.28	106.35	118.26	83.79	100.87	52.17	53.42	29.21	16.16	77.88	70.53	70.92	61.86	60.49	69.98	55.7	53.77	35.33	40.16	271.51	298.67	306.78	19.09	17.73	16.57	47.76	52.89	60.62	6.82	5.64	6.82	80.9	27.83	90.34	42.15
YBR287W	5.67	5.1	8.85	5.77	17.04	11.18	13.16	12.58	14.77	17.58	11.11	13.33	5.84	4.93	3.35	1.42	10.87	10.84	11.64	6.47	6.4	7.62	9.91	10.98	6.78	7.48	26.88	47.84	47.9	1.89	1.88	1.66	6.97	7.61	8.67	0.6	0.81	0.46	10.42	6.88	11.88	6.76
YBR288C	4.64	3.53	5.32	2.46	6.82	5.48	6.44	5.12	8.11	7.56	6.22	6.87	3.37	0.67	2.11	0.33	4.93	4.29	4.62	1.07	1.35	0.91	6.06	5.12	4.98	5.7	17.77	35.05	35.36	1.9	1.86	2.11	5.76	6.12	6.64	0.52	0.67	0.48	8.23	2.34	9.36	2.52
YBR289W	66.81	62.05	61	47.35	197.77	169.15	164.45	166.14	150.13	174.68	142.79	174.53	39.87	17.86	54.01	9.63	142.17	138.85	115.29	39.97	41.79	45.37	80	73.8	59.74	76.86	208.02	624.99	665.79	25.37	25.61	25.36	99.16	104.77	126.09	9.86	17.25	10.69	112.99	15.06	139.02	37.3
YBR290W	41.77	35.61	43.92	27.86	72.38	59.13	48.45	54.07	64.69	71.3	57.82	63.33	21.47	8.02	32.47	5.45	59.82	42.69	38.95	18	16.79	21.25	49.76	53.18	34.78	49.32	79.77	208.63	192.5	13.73	13.64	13.17	48.98	43.89	59.12	5.79	6.73	5.71	64.93	7.4	76.22	16.07
YBR291C	1.32	0.59	1.13	0.53	1.98	2.53	1.77	1.47	3.1	2.9	2.21	2.08	0.63	0.16	0.54	0.08	1.64	0.89	1.45	0.23	0.15	0.06	1.59	1.53	1.31	1.7	3.62	7.72	8.96	0.24	0.18	0.15	1.33	1.46	1.66	0.03	0.12	0.12	2.35	0.5	2.27	0.48
YBR293W	1.65	0.9	1.9	0.91	5.64	5.45	4.67	4.57	6.65	6.23	5.18	5.75	0.78	0.03	0.8	0.06	3.42	2.89	3.17	0.23	0.56	0.43	2.06	1.76	2.16	2.45	7.39	13.1	16.46	0.92	0.88	0.74	2.14	1.77	2.49	0.21	0.24	0.29	2.67	0.41	2.14	0.38
YBR295W	5.2	3.45	5.41	3.2	13.59	11.26	11.92	11.82	14.21	14.84	11.31	12.45	2.35	0.74	2.82	0.42	8.53	7.5	7.84	1.62	1.87	2.57	5.38	4.62	4.79	5.22	25.87	59.49	59.1	2.25	1.4	1.77	9.82	11.42	12.76	0.31	0.72	0.37	13.14	4.46	13.72	2.54
YBR296C	1.11	0.48	0.35	0.07	1.74	1.53	1.51	1.29	3.3	3.84	2.54	2.66	0.06	0.02	0.04	0.02	0.6	0.8	0.82	0.31	0.18	0.5	0.18	0.12	0.67	0.25	14.97	31.52	29.06	0.67	0.65	0.82	5.13	4.72	2.79	0.07	0.1	0.04	9.88	1.41	8.88	1.16
YBR297W	1.84	2.07	1.39	0.85	2.74	2.8	2.2	1.97	3.15	3.41	2.86	3.3	0.49	0.16	0.33	0.16	2.04	1.93	1.92	0.88	1.1	0.93	1.62	1.74	1.5	2.44	5.04	10.53	14.07	2.5	2.67	1.87	1.33	0.75	0.93	0.08	0.1	0.09	4.99	1.36	6.03	1.81
YBR298C	2.24	2.96	2.29	1.76	4.5	3.78	4.52	3.63	5.49	7.3	3.44	4.58	0.87	1.23	1.1	0.72	2.68	2.11	3.4	1.61	1.7	2.14	2.19	2.47	1.87	2.69	3.77	6.83	7.42	1.57	1.56	1.27	0.92	0.68	1.01	0.21	0.23	0.25	2.89	3.77	3.68	3.16
YCL001W	4.64	2.69	3.97	2.71	5.79	5.03	4.15	4.43	5.42	5.01	5.02	5.67	2.34	1.09	2.9	0.81	5.02	4.04	4.08	1.91	2.54	2.72	6.84	7.63	5.4	8.36	14.41	18.97	17.44	0.25	0.36	0.36	4.49	4.86	4.84	0.1	0.14	0.12	6.34	0.52	6.73	1.21
YCL002C	2.93	1.21	2.87	1.35	4.24	2.73	2.84	3.28	3.88	3.28	2.94	3.22	1.06	0.11	1.27	0.12	2.55	1.82	2.04	0.37	0.37	0.24	3.79	3.59	3.15	4.84	6.87	14.55	13.79	0.37	0.23	0.28	2.69	2.28	3.34	0.1	0.07	0.04	2.67	0.67	3.28	1.08
YCL004W	4.25	2.45	3.95	2.23	11.8	11.51	10.21	9.16	11.84	11.32	10.24	11.18	2.32	0.33	2.71	0.22	7.72	7.41	7.18	1.44	1.13	1.12	4.66	4.64	3.79	4.87	16.35	40.6	41.87	1.36	1.23	1.31	5.01	4.44	6.87	0.23	0.59	0.27	6.1	0.87	7.44	1.55
YCL005W	7.54	4.39	7.57	3.48	14.04	12.23	10.18	9.76	15.3	14.92	12.96	11.71	3.74	0.43	4.2	0.29	10.23	8.25	9.06	1.18	1.49	1.49	8.74	7.31	7.39	8.6	17.95	44.94	44.96	1.51	1.67	1.42	8.77	9.45	11.1	0.66	0.8	0.65	10.61	1.64	11.22	2.57
YCL005W-A	7.64	4.32	5.9	2.75	5.37	4.25	3.16	4.66	8.11	5.81	6.8	5	4.46	0.97	3.82	0.78	4.32	2.91	1.88	0.94	1.23	1.16	13.26	12.26	6.9	10.72	26.95	22.83	26.82	1.43	1.48	1.44	7.16	9.17	8.81	0.9	0.95	0.81	8.28	1.45	10.79	3.19
YCL008C	14.52	9.88	14.8	7.09	42.64	36.27	32.88	31.52	51.16	51.27	43.08	44.14	10.12	1.73	9.54	0.96	29.73	26.38	22.24	6.23	5.21	6.92	18.51	17.81	14.32	16.58	51.44	105.96	115.26	4.26	4.79	4.01	20.8	20.29	25.36	1.28	1.33	1.28	27.39	2.77	33.39	5.57
YCL009C	19.71	16.07	19.86	13.74	60.44	53.48	53.29	50.9	75.53	85.07	84.32	89.38	17.65	13.73	19.7	8.96	34.2	27.27	24.89	23.4	22.38	30.07	33.07	28.74	29.3	38.27	123.7	141.01	145.23	15.55	16.33	17.37	27.65	31.43	32.89	5.42	5.43	5.26	32.84	14.02	32.61	13.45
YCL010C	7.05	4.97	8.2	4.12	22.94	20.06	19.02	18.62	20.36	20.54	18.05	17.51	3.32	0.99	5.86	0.72	15.8	15.61	12.06	3.55	3.27	3.49	9.69	9.15	9.67	10.64	25.01	54.83	60.01	1.76	2.29	1.96	10.44	8.87	12.58	0.7	0.78	0.68	12.49	6.73	12.84	3.71
YCL011C	68.83	63.16	71.68	53.54	110.28	86.33	90.81	79.6	108.77	110.14	88	96.48	36.56	13.95	43.06	8.93	77.5	70.07	75.36	22.54	22.89	25.69	71.43	64.49	57.26	72.85	206.34	408.49	439.4	22.19	21.81	20.92	74.87	73.15	90.12	9.99	11.75	10.19	88.06	52.8	100.89	37.03
YCL012C	1.69	1.04	1.38	1	2.9	2.63	1.8	1.95	2.82	2.02	1.87	2.37	1.06	0.39	0.92	0.29	2.74	1.68	2.46	0.8	0.82	0.71	1	0.87	0.66	0.82	4.85	7.96	8.89	0.4	0.43	0.46	2.31	2.42	2.65	0.17	0.17	0.25	2.51	0.56	3.18	0.73
YCL014W	20.34	13.82	22.21	12.09	68.16	51.21	58.89	50.17	61.79	58.04	44.01	53.03	15.95	2.39	10.79	1.04	40.45	39.4	43	5.73	7.25	7.64	22.86	17.85	18.79	18.96	90.67	193.59	201.25	11.03	10.18	10.33	27.06	30.94	36.23	3.25	5.04	3.74	39.29	5.71	42.09	6.89
YCL016C	5.7	2.98	5.6	2.2	8.98	9.53	9.05	8.54	10.69	11.13	8.14	8.94	2.44	0.11	3.58	0.07	6.61	6.45	4.6	0.5	0.55	0.54	5.21	4.87	3.83	5.38	17.92	39.15	36.83	1.33	1.14	1.43	6.46	7.23	8.67	0.43	0.43	0.37	8.85	0.46	8.52	0.97
YCL017C	13.08	7.74	12.71	6.81	23.94	20.64	22.41	18.21	23.84	25.22	20.32	26.58	4.64	0.27	6.69	0.59	18.72	16.04	17.62	2.97	3.21	3.15	14.06	10.82	11.26	12.62	51.55	94.14	94.04	6.08	5.29	4.36	19.39	22.57	23.63	2.43	2.81	2.29	19.67	2.36	19.09	2.16
YCL021W-A	1.01	1.4	1.11	1.16	2.66	2.78	2.52	2.04	3.91	4.18	3.26	3.11	0.59	1.13	0.5	0.83	2.47	2.23	2.56	2.86	3.24	3.04	1.21	1.62	1.24	1.29	8.81	5.95	4.55	1.15	1.38	1.38	0.83	0.81	1.05	0.24	0.12	0.34	1.19	2.32	1.84	1.62
YCL024W	8.66	7.08	12.47	7.72	31.79	28.44	30.82	27.05	22	23.92	17.82	20.22	9.74	4.43	5.97	1.73	17.95	16.59	16.52	6.17	7.41	7.42	12.21	12.51	8.31	12.63	48	105.56	112.67	4.61	4.24	4.47	17.05	14.61	20.01	0.6	1.28	0.63	20.54	4.82	23.66	7.33
YCL025C	8.04	11.55	8.89	11.32	38.87	33.44	42.07	41.24	42.24	43.12	45.33	55.32	7.76	11	8.69	6.21	25.59	23.72	27.4	33.96	32.45	43.45	10.07	11.66	8.88	14.74	57.74	128.07	135.99	3.72	3.15	3.36	19.02	12.47	18.15	1.25	0.83	1.23	18.59	71.73	21.41	71.27
YCL026C-A	27.95	30.57	21.83	24.14	11.04	10.61	11.66	11.94	15.88	15.32	20.05	22.75	0.17	0.08	18.52	14.48	27.35	21.29	18.6	19.91	21.09	25.54	26.8	25.15	39.85	67.87	13.66	20.82	20.52	0.19	0.12	0.11	39.09	66.13	47.51	1	5	1.3	7.31	1.26	5.25	1.87
YCL026C-B	111.87	154.04	102.34	113.42	27.5	28.57	27.22	30.95	34.02	33.69	43.17	35.39	0.86	0.48	59.72	40.77	97.07	64.53	60.01	89.28	74.32	84.44	131.81	150.64	110.16	189.12	20.83	34.81	27.59	0.31	0.31	0.37	121.15	154.15	110.24	5.64	19.25	5.14	26.01	7.34	17.13	9.06
YCL027W	6.08	6.6	8.29	5.31	34.63	22.96	23.25	24.04	54.79	62.89	44.79	54.28	4.03	3.91	6.09	3.27	31.94	29.4	35.52	23.14	23.3	27.89	8.44	7.59	6.78	8.87	13.77	37.87	37.39	2.03	1.76	1.15	1.38	1.12	0.97	0.2	0.19	0.26	2.81	3.22	3.68	4.71
YCL028W	12.37	6.95	13.39	6.19	26.92	25.21	22.88	20.94	32.76	30.34	24.69	23.68	9.26	0.74	6.39	0.39	19.21	15.93	16.16	1.69	1.97	1.9	15.25	10.7	10.63	10.67	77.9	124.21	132.63	5.16	4.96	5.81	19.8	21.08	24.73	1.52	2.32	1.62	24.96	1.51	27.92	3.55
YCL029C	11.63	5.13	11.04	4.21	37.22	33.82	28.91	26.82	41.81	45.81	34.8	37.09	6.19	0.14	6.63	0.41	26.59	22.06	19.03	1.9	1.65	1.6	10.73	7.75	9.65	9.02	41.62	92.78	92.85	1.98	1.96	2.22	17.46	18.71	19.71	1.09	1.34	0.82	20.89	1.82	22.52	1.95
YCL030C	3.07	2.72	3.95	3.06	24.05	16.51	24.41	22.27	51.74	49.99	42.54	49.09	6.35	5.49	3.36	2.05	7	6.27	7.86	8.16	8.14	10.31	9.77	8.28	16.48	17.09	45.99	81.04	75.35	6.07	5.65	5.85	7.41	7.54	8.36	0.81	1.09	1.24	9.39	38.1	10.21	36.6
YCL031C	61.13	43.86	58.44	37.11	102.82	92.7	75.56	78.55	100.96	110.88	91.15	107.87	24.11	4.68	36.53	4.01	80.86	69.87	59.05	16.92	18.58	19.39	80.77	79.56	65.31	87.32	109.7	261.04	254.89	15.43	13.83	14.04	55.93	58.13	66.77	6.7	9.84	7.38	63.23	6.64	65.65	13.82
YCL032W	7.38	3.3	7.49	2.62	14.09	11.98	10.61	10.03	14.72	14.65	11.76	11.18	4.03	0.15	4.16	0.15	11.21	8.07	9.69	0.75	1.03	0.78	8.63	7.13	6.98	7.49	23.37	48.56	45.03	1.56	1.56	1.6	8.41	10.52	11.73	0.19	0.42	0.2	12.9	1.19	12.94	1.84
YCL033C	1.05	0.55	0.94	0.38	1.61	1.13	1.04	1.08	1.26	1.15	1.07	0.88	0.6	0.03	0.66	0.02	1.98	1.18	0.7	0.19	0.17	0.13	0.76	0.6	0.55	0.7	5.93	5.23	6.72	0.16	0.26	0.19	1.55	2.26	2.75	0.05	0.07	0.04	2.67	0.17	2.93	0.14
YCL034W	14.45	8.91	14.22	7.54	21.81	18.51	18.64	17.36	27.02	24.74	20.63	19.48	11.11	1.96	9.92	0.92	21.16	16.56	15.72	4.48	4.27	4.08	13.88	13.9	9.71	12.09	56.59	102.67	107.63	4.42	4.42	3.99	24.71	24.9	30.34	1.74	1.47	1.35	29.15	5.15	36.02	6.68
YCL035C	8.46	7.65	10.01	6.86	7.03	7.28	7.31	6.04	8.24	8.42	6.8	6.2	8.62	8.22	5.73	2.96	8.29	6.41	5.63	5.83	5.28	6.17	12.56	16.26	7.46	10.97	44.12	53.78	50.91	2.23	2.3	1.82	10.86	11.64	13.41	0.64	0.88	0.71	23.45	5.04	22.95	8.33
YCL036W	6.72	4.11	5.64	3.81	28.55	24.44	22.27	18.69	19.81	20.03	16.93	17.32	2.43	1.6	3.64	1.31	12.02	12.54	11.1	3.62	3.79	3.97	5.22	3.66	8.8	8.99	11.53	28.7	26.96	1.68	2.01	1.64	4.45	4.68	5.43	0.45	0.43	0.62	5.21	1.04	5.27	0.73
YCL037C	146.44	107.91	132.68	87.98	659.44	544.12	529.6	486.19	503.5	573.2	450.21	546.39	88.81	47.24	93.21	24.26	373.71	386.49	316.8	131.94	128.45	141.48	205.93	179.15	161.88	193.8	404.36	924.95	947.22	81.01	84.66	85.6	159.88	179.12	198.17	36	42.68	38.31	179.62	16.31	189.21	37.09
YCL038C	0.89	0.43	0.82	0.34	2.92	1.93	2.03	1.63	3.07	3.22	2.21	2.74	0.77	0.29	0.56	0.09	2.11	1.3	1.78	0.58	0.59	0.86	0.74	0.6	0.71	1.03	7.09	12.22	14.92	0.89	0.88	0.86	1.51	1.68	1.98	0.54	0.31	0.54	2.7	0.45	2.27	0.41
YCL039W	15.71	14.85	17.08	11.14	59.18	55.73	49.93	47.5	63.99	73.62	56.22	57.32	12.17	2.58	11.91	1.11	51.15	46.78	39.39	8.89	8.72	8.76	12.82	11.68	8.99	9.51	67.97	154.44	176.32	11.13	10.92	9.97	26.58	22.5	33.05	3.22	4.47	2.88	34.97	6.3	42.85	10.65
YCL040W	9.05	21.64	14.9	17.08	15.91	15.28	16.09	17.95	19	20.56	12.74	13.12	47.3	84.05	13.06	15.41	32.97	24.72	32.63	67.57	51.39	66.23	13.17	19.27	5.37	10.67	112.09	160.95	202.3	2.27	2.19	2.01	18.58	20.38	26.81	0.61	1.07	0.74	87.49	250.5	92.03	175.33
YCL042W	0.56	0.86	0.96	0.63	1.98	2.28	1.97	1.45	2.09	2.53	1.99	2.13	0.63	1.59	0.6	0.59	2.32	2.34	1.43	4.71	4.01	4.72	0.72	0.82	0.54	0.55	3.36	8.6	9.45	0.34	0.29	0.21	0.73	0.58	0.55	0.06	0.02	0.04	1.43	0.78	1.97	2.22
YCL043C	28.97	29.21	35.23	27.02	87.76	66.21	78.89	68.21	101.41	97.01	68.22	74.77	42.41	52.78	19.26	12.47	72.99	62.33	70.97	72.42	56.36	71.19	43.9	38.61	32.32	36.63	280.28	360.65	367.56	13.58	13.95	12.36	48.39	50.66	57.94	4.23	4.95	4.57	89.51	97.61	104.59	89.38
YCL044C	35.76	25.52	36.41	19.55	114.02	100.06	92.37	89.18	102.22	121.78	92.51	104.89	21.24	5.09	24.92	1.99	96.83	85.96	73.22	19.39	15.92	20.11	41.65	34.09	30.26	33.83	108.62	259.36	290.81	7.57	7.44	7.6	51.18	49.4	62.52	3.6	6.4	3.38	62.47	4.43	75.14	10.38
YCL045C	21.3	16.12	22.31	13.49	60.87	48.4	50.68	46.06	53.38	57.16	43.3	53.4	13.39	2.08	12.49	1.14	38.83	40.33	37.28	6.75	7.04	6.95	23.57	19.45	16.28	19.79	92.94	161.35	165.68	9.81	8.86	9	22.62	22.64	28.8	4	4.37	3.9	26.58	5.41	27.52	6.31
YCL047C	1.59	0.53	2.27	0.45	5.77	3.73	4.2	3.42	4.44	4.13	3.28	2.58	0.99	0.04	0.84	0.02	2.7	2.07	2.3	0.23	0.21	0.17	1.54	1.48	1.66	1.85	9.18	18.41	16.95	0.19	0.2	0.22	2.8	2.82	3.81	0.03	0.11	0.02	5.15	0.37	4.67	0.25
YCL049C	0.57	0.39	0.86	0.38	2.05	2.55	2.17	1.77	4.39	3.78	2.45	3.06	0.69	0.19	0.42	0.1	1.72	1.39	1.64	0.65	0.49	0.47	0.51	0.69	0.41	0.34	6.98	9.73	14.07	1.8	1.52	1.57	1.44	1.19	1.96	0.28	0.38	0.21	3.35	1.23	4.01	1.3
YCL050C	41.32	34.19	39.69	23.9	60.92	51.11	41.87	45.32	61.89	66.03	49.66	62.03	17.34	7.79	19.77	4.07	59.93	52.69	40.82	13.55	13.71	13.22	70.73	65.71	38.66	50.49	119.07	177.92	195.72	8.85	9.31	9.48	50.07	56.15	54.91	4.06	5.69	3.48	30.36	3.61	36.22	8.63
YCL051W	13.39	9.31	15.52	8.18	33.48	28.32	27.28	26.84	33.17	35.8	24.72	29.48	9.23	1.19	8.63	0.69	24.52	22.84	21.75	4.38	5.07	4.79	19.62	20.3	13.47	18.25	52.85	120.67	132.77	7.76	7.47	7.54	18.88	19.64	22.78	2.76	3.05	2.93	25.77	5.35	28.27	9.66
YCL052C	10.48	6.34	12.68	5.5	19.2	15.73	15.71	14.92	18.93	19.6	14.34	15.14	7.7	0.66	6.72	0.34	15.23	13.43	14.62	2.01	2.55	1.7	15.02	13.56	9.67	12.47	40.76	80.88	91.94	3	2.65	2.3	11.83	13.28	16.57	0.56	0.94	0.68	18.81	3.61	20.48	3.82
YCL054W	48.34	29.75	46.79	25.17	105.35	73.17	88.2	66.24	104.28	103.13	75.91	94.78	20.49	2.34	21.87	1.44	47.57	46.12	52.3	4.25	5.51	4.9	54.6	28.72	54.7	56.65	128.7	305.34	295.08	23.57	21.75	22.41	45.92	61.22	57.44	11.65	11.74	12.35	55.54	5.22	47.49	3.49
YCL055W	4.93	4.5	5.88	3.76	12.25	9.68	9.6	9.37	18.8	19.55	14.43	17.11	2.29	1.33	2.86	1.68	11.1	11.7	12.74	7.24	8.79	11.02	5.75	6.45	4.94	7.62	15.42	33.69	31.72	2.11	1.99	1.74	3.13	2.7	3.26	0.22	0.23	0.25	5.24	1.65	6.33	2.46
YCL056C	7.32	4.27	8.35	3.39	10.25	7.78	6.55	7.07	12.47	12.52	10.4	9.42	3.23	0.48	4.34	0.62	7.76	5.52	4.62	1.56	1.83	1.51	8.08	8.34	8.83	9.9	16.13	34.01	29.41	0.86	1.03	0.58	6.08	6.19	8.26	0.14	0.2	0.06	11.17	2.16	12.76	3.01
YCL057C-A	5.24	3.85	4.86	3.09	5.19	5.28	3.86	5.19	7.54	6.15	5.53	5.83	3.02	1.8	3.03	0.89	7.13	4.34	3.47	3.2	2.77	3.82	7.55	8.34	4.46	7.42	14.59	14.63	15.83	0.7	0.56	0.47	4.61	5.12	4.66	0.21	0.23	0.12	6.15	0.76	7.16	1.52
YCL057W	20.94	16.01	25.41	14.79	41.69	28.97	31.81	30.26	35.48	34.44	24.85	26.34	16.33	2.53	12.1	1.15	32.84	28.58	31.63	5.6	6.92	6.77	23.28	20.17	15.74	16.46	107.16	151.06	172.54	7.36	5.93	6.07	20.31	21.38	27.34	1.42	1.68	1.23	27.82	7.73	31.53	6.62
YCL058W-A	9.81	4.63	9.68	4.16	8.14	6.93	5.71	5.58	13.46	11.35	10.6	10.16	2.95	0.54	4.95	0.56	5.55	3.45	3.12	0.7	0.68	0.84	13.06	11.93	11.08	15.79	13.85	33.85	21.43	0.76	0.81	1.07	10.69	11.54	13.55	0.36	0.15	0.38	11.77	0.3	12.86	0.44
YCL059C	17.36	8.69	15.3	6.87	20.91	17.86	16.03	15.02	29.64	24.05	22.73	23.58	7.18	0.83	7.45	0.51	13.12	10.91	11.17	1.43	1.13	1.32	22.24	13.79	18.92	21.42	42.74	79.83	70.09	3.33	2.91	2.45	14.09	19.59	17.88	1.07	1.41	1.02	14.28	0.65	11.5	0.43
YCL061C	26.66	13.39	34.63	13.12	94.47	77.47	84.78	71.77	61.42	63.79	49.32	60.64	18.92	1.78	16.51	0.83	49.75	48.12	49.25	5.16	6.23	5.95	37.56	30.04	30.27	35.31	122.47	298.03	324.7	8.42	8.16	7.95	44.89	40.3	54.88	0.98	2.81	1.23	53.14	8.14	54.73	9.49
YCL063W	12.45	9	12.28	7.49	26.81	21.29	22.76	21.7	23.56	25.62	18.63	20.22	7.18	1.7	6.7	1.22	18.33	15.45	14.55	4.9	5.72	5.03	14.33	13.44	11.28	14.5	55.92	127.02	135.57	4.05	4.24	4.38	15.79	16.63	21.77	0.74	1.15	0.6	27.69	8.29	29.81	10.44
YCL064C	10.61	15.49	8.37	9.14	27.84	21.71	29.49	25.85	12.37	9.83	10.4	10.72	5.47	7.14	5.38	5.94	22.76	20	17.97	20.84	22.52	21.4	5.78	9.65	5.62	11	88.02	173.9	177.51	4.11	3.31	4.26	27.52	35.48	34.33	1.78	1.93	1.81	74.19	35.62	58.36	29.18
YCR002C	9.38	5.84	9.22	5.48	10.75	9.08	8.81	8.29	12.3	10.41	8.88	9.34	5.18	1.18	4.37	0.61	8.27	7.73	7.86	2.32	2.14	2.39	10.73	10.97	9.05	10.79	31.35	48.96	55.95	3.15	2.61	2.46	8.77	10.05	10.73	1.3	1.05	1.12	12.06	3.7	11.5	3.2
YCR003W	11.58	6.98	11.19	6.79	11.51	11.58	9.31	9.6	13.33	15.08	11.15	12.45	5.25	0.8	6.13	0.74	12.04	7.95	7.55	1.72	2.07	2.22	12.79	11.93	9.22	14.16	24.82	58.13	59.66	2.15	2.28	1.57	12.7	12.98	14.48	0.84	0.9	0.66	15.65	1.86	16.49	4.2
YCR004C	23.4	28.76	25.9	23.72	36.69	35.02	31.78	31.59	29.18	33.43	29.38	29.43	12.81	9.14	24.02	15.5	63.65	50.4	50	51.75	42.95	57.82	35.44	36.72	32.04	46.33	92.05	137.72	164.7	4.19	4.67	4.39	42.13	53.05	51.4	4.58	4.08	5.29	45.82	21.79	47.74	18.93
YCR005C	26.1	37.5	25.02	27.06	83.86	82.95	94.35	84.01	68.62	65.15	54.59	71.13	16.73	22.52	17.86	17.39	62.4	60.05	67.5	64.23	59.91	77.27	26.54	22.88	23.94	24.76	159.35	340.07	356.77	11.71	11.85	9.91	113.55	102.59	124.25	17.85	17.62	16.38	106.41	74.91	111.58	73.39
YCR007C	1.19	0.55	1.38	0.45	2.03	2.7	1.62	1.95	3.05	3.12	1.96	2.37	0.85	0.13	0.87	0.06	1.79	1.57	1.88	0.32	0.39	0.63	1.32	1.03	1.09	1.36	2.91	8.84	8.12	0.34	0.22	0.36	1.05	1.44	1.66	0.07	0.12	0.06	2.05	0.13	2.27	0.36
YCR008W	21.99	22.18	33.95	20.12	131.53	94.33	111.48	88.05	93.72	104.36	74.64	86.19	24.52	19.63	13.14	6.43	69.37	68.82	79.58	40.31	36.48	46.58	35.85	31.46	35	38.66	104.55	231.22	250.76	3.45	3.27	2.88	28.71	29.78	34.21	0.63	1.36	0.76	50.63	31.14	46.58	38.98
YCR009C	13.89	9.78	16.85	9.06	20.86	17.36	16.7	16.97	25.08	23.12	16.66	20.86	11.89	5.79	7.09	2.23	16.55	14.13	15.67	5.92	6.87	7.79	21.16	18.89	14.02	17.49	59.27	96.31	106.79	4.14	3.74	3.38	17.66	19.26	20.6	1.16	1.8	1.13	24.69	7.07	26.13	10.07
YCR011C	14.28	11.49	20.26	11.2	41.53	25.49	34.47	29.96	34.88	32.71	20.81	25.76	18.87	15.7	9.55	3.59	25.37	22.97	30.97	13.61	13.69	15.64	22.11	21.83	19.13	22.72	91	173.57	213.36	4.81	4.82	3.89	24.8	26.06	31.72	1.36	2.37	1.46	39.16	38.36	42.47	25.84
YCR012W	54.13	71.88	64.36	70.89	71.01	61.24	72.69	61.49	64.59	85.79	57.58	76.71	61.12	117.37	30.9	32.52	78.18	72.23	66.07	103.06	98.26	107.78	74.95	73.71	36.54	46.44	323.96	294.09	305.24	12.03	12.33	11.31	54.35	66.13	71.9	5.89	5.6	6.4	71.38	144.84	74.91	108.25
YCR014C	6.36	2.65	8.06	2.84	21.02	16.33	15.25	13.89	17.94	19.98	14.25	17.51	3.96	0.38	3.67	0.18	10.29	9.88	13.21	0.7	1.07	1.14	8.19	6.83	7.56	8.69	16.54	41.32	46.5	2.44	2.46	2.41	7.65	7.38	8.57	0.76	0.71	0.68	9.5	1.43	11.98	1.63
YCR015C	4.87	1.8	5.06	1.64	11.72	10.26	9.42	9.34	10.31	11.16	7.76	11.1	2.31	0.19	3.4	0.17	7.59	6.59	6.55	0.45	0.48	0.67	5.96	5.51	5.14	6.23	16.01	44.78	39	0.83	0.67	0.65	5.23	5.44	6.83	0.16	0.3	0.25	7.48	0.54	7.64	0.51
YCR016W	24.56	13.91	24.57	11.35	40.77	37.47	32.94	31.48	49.87	49.25	41.69	49.6	8.73	0.36	12.76	1.48	26.54	22.02	20.62	2.76	2.87	2.63	30.62	20.53	27.55	31.17	55.06	120.75	112.32	3.37	3.83	3.45	19.73	26.66	27.44	1.11	1.9	1.28	24.48	3.33	21.64	2.87
YCR017C	10.01	7.18	13.45	7.34	30.53	22.26	25.95	21.72	29.66	30.98	22.42	28.23	7.07	1.57	5.47	0.91	17.5	17.7	19.61	2.89	3.21	3.39	14.69	12.76	13.63	16.8	64.8	110.46	118.48	7.09	6.27	5.76	17.06	19.17	21.67	1.78	2.95	1.74	24.69	6.75	25.47	5.43
YCR018C	7.48	9.36	7.53	7.37	22.65	16.78	16	18.57	33.09	30.36	21.97	21.23	5.51	8.06	4.12	3.51	15.1	10.41	11.97	18.47	19.26	20.58	11.79	13.47	12.04	14.64	15.23	42.13	35.64	1.19	1.26	0.72	5.61	5.84	6.83	0.11	0.3	0.13	12.25	17.89	11.83	15.09
YCR019W	6.89	3.43	8	3.38	10.82	9.66	9.02	8.31	9.83	10.15	9.55	9.93	2.94	0.18	5.27	0.52	8.68	6.7	8.09	1.09	1.42	1.73	8.93	7.87	8.08	9.43	18.18	37.22	41.66	1.78	1.42	1.6	8.57	9.19	11.38	0.3	0.75	0.46	9.85	1.8	12.01	1.94
YCR020C	0.34	0.3	0.42	0.15	0.42	0.5	0.67	0.32	0.78	0.45	0.4	0.37	0.31	0.03	0.13	0.04	0.32	0.16	0.35	0.03	0.04	0.09	0.22	0.34	0.38	0.27	1.38	3.62	2.45	0.39	0.31	0.47	0.24	0.4	0.43	0.05	0.15	0.18	0.51	0.13	0.58	0.22
YCR020C-A	2.93	1.82	2.67	1.36	4.45	3.4	2.55	3.08	4.71	4.77	4.91	5.37	1.03	0.24	1.39	0.18	2.91	2.14	1.99	0.36	0.51	0.52	3.73	2.95	2.93	4.5	10.56	13.27	13.65	0.65	0.73	0.62	3.08	3.6	3.69	0.27	0.41	0.26	3.72	0.2	3.78	0.78
YCR020W-B	4.31	2.32	4.51	2.36	4.93	3.95	3.89	4.39	4.59	5.89	4.53	4.28	1.72	0.18	2.14	0.25	3.68	3.32	2.37	0.8	0.73	0.5	4.77	5.21	3.78	5.8	7.2	16.24	15.83	0.86	0.76	0.66	2.21	2.46	2.86	0.24	0.15	0.22	2.48	0.46	3.38	0.52
YCR021C	14.46	18.73	19.3	15.33	2.19	2.38	2.06	1.88	2.9	2.34	2.03	2.53	5.95	5.09	8.78	6.32	7.89	7	6.22	4.12	3.78	3.47	25.66	29.06	6.75	9.93	13.51	22.03	26.89	1.06	0.78	0.96	17.18	39.09	27.38	0.41	3.07	0.81	14.11	6.53	17.15	10.88
YCR023C	4.52	2.9	5.68	2.69	10.03	7.9	9.39	8.56	10.74	11.19	9.5	11.65	3.89	0.61	3.18	0.38	6.66	6.52	7.11	1.3	1.49	1.9	7.6	6.81	6.52	8.66	16.83	33.28	35.64	1.9	2.02	1.88	5.05	6.17	7.37	0.71	0.91	0.64	6.69	1.1	7.26	1.21
YCR024C	6.68	3.89	7.35	3.37	22.04	21.74	19.08	19.38	20.09	24	15.55	20.65	2.4	0.24	4.32	0.41	19.8	17.81	16.49	3.07	3.39	4.12	9.77	9.78	9.2	11.9	26.43	56.84	62.46	2.21	1.79	1.61	9.5	9.36	11.34	0.23	0.44	0.23	11.2	3.24	13.04	3.98
YCR024C-A	20.32	24.33	20.71	25.13	36.95	36.32	34.44	34.9	24.67	35.77	31.94	43.77	17.22	27.47	14.71	10.9	34.9	37.88	24.94	29.24	33.69	34.99	24.25	24.21	18.32	23.92	75.51	127.99	172.89	3.61	2.9	2.46	13.02	11.22	18.61	1.36	2.46	1.22	33	23.76	27.77	34.3
YCR024C-B	6.51	7.2	8.12	7.85	10.19	9.51	9.42	10.03	9.25	6.95	8.14	10.72	5	9.8	4.35	3.36	9.63	10.16	7.11	7.71	10.55	11.07	7.23	8.48	5.23	7.89	27.77	20.02	35.71	1.02	0.49	0.43	5.71	5.02	5.89	0.52	0.61	0.49	10.25	6.21	12.31	12.22
YCR026C	21.57	13.72	23.58	12.95	60.58	46.33	53.49	43.35	48.66	51.46	37.63	46.25	14.21	1.74	12.27	0.91	33.98	34.13	35.05	4.49	5.48	5	23.33	18.17	18.4	22.4	83.69	178.88	202.65	7.3	7.51	6.61	28.47	29.88	35.34	2.33	3.95	2.43	37.83	9.76	39.07	8.06
YCR027C	5.59	2.73	6.19	2.45	10.38	11.18	10.47	8.13	11.32	12.25	10.13	13.04	2.4	0.22	3.52	0.26	7.42	7.07	5.35	0.83	0.9	0.97	8.26	8.11	5.48	7.94	18.1	44.62	44.05	0.75	0.62	0.6	6.8	7.1	8.91	0.16	0.3	0.21	8.37	1.9	8.2	2.17
YCR028C	4.06	2.28	4.08	2.34	12.41	8.66	9.39	8.22	11.97	11.77	8.99	10.35	2.11	0.09	1.84	0.09	6.63	6.86	8.31	0.7	0.9	0.91	4.31	2.61	4.41	4.47	15.75	31.92	33.68	1.38	1.52	1.42	4.5	5.4	6.83	0.45	0.88	0.36	6.15	1.45	6.03	0.84
YCR028C-A	4.47	2.11	4.59	2.36	5.11	5.18	4.49	3.88	6.12	5.75	4.53	6.04	2.37	0.38	2.18	0.26	5.57	3.7	3.43	1.25	0.76	0.86	5.61	5.81	4.21	6.56	19.3	20.26	22.2	0.83	0.7	0.93	4.76	4.66	5.51	0.36	0.39	0.39	5.4	1.08	5.12	1.7
YCR030C	21.03	17.4	27.89	14.53	87.26	66.36	73.44	68.86	63.36	78.31	54.65	58.91	24.41	11.55	15.46	3.25	73.69	66.3	67.94	24.5	21.57	24.81	29.32	31.82	21.31	25.64	81.11	188.45	207.34	11.09	10.66	10.47	30.12	30.09	36.8	3.49	5.27	3.68	40.02	8.94	49.51	15.44
YCR031C	16.53	14.17	16.41	12.25	19.7	17.66	16.12	16.14	23.56	16.94	15.79	14.1	13.52	7.64	8.34	3.74	16.74	11.95	13.14	10.3	11.73	13.48	23.15	22.86	17.94	22.9	95.26	66.33	62.67	6.25	6.27	6.41	17.97	17.29	20.88	2.67	3.04	2.42	22.4	9.48	22.37	10.2
YCR032W	17.46	8.73	23.48	8.91	44.64	31.74	34.62	30.05	34.15	36.6	26.1	33.31	12.23	0.63	10.41	0.45	27.71	25.22	31.95	2.58	2.72	2.55	22.45	19.32	18.18	21.21	61.92	131.85	130.95	5.93	4.54	5.03	20.58	19.73	26.11	0.99	1.96	1.45	27.55	3.55	29.76	3.06
YCR033W	60.47	52.25	74.45	45.53	197.8	147.19	179.5	140.4	168.52	173.85	132.24	156.7	39.56	15.84	36.82	7.85	113.23	113.4	133.17	34.84	35.6	40.19	87.16	76.78	77.07	95.8	238.96	588.25	644.29	29.45	26.65	29.09	90.15	87.39	106.87	12.16	19.58	13.18	90.19	53.19	103.03	50.78
YCR034W	5.5	3.15	5.15	3.05	15.38	14.61	12.15	14.14	14.36	14.01	12.43	15.17	2.98	0.83	3.32	0.45	10.91	10.38	8.38	2.04	2.65	2.37	7.5	7.48	6.33	7.97	22.28	31.6	33.68	1.58	1.4	1.08	4.88	5.95	6.44	0.47	0.68	0.42	6.56	0.91	6.73	2.38
YCR035C	16.83	12.05	18.27	9.69	34.34	31.94	31.34	26.7	42.87	42.06	32.21	37.81	8.86	1.68	8.48	1.38	23.52	22.84	22.57	5.35	6.28	7.59	18.94	12.51	16.04	16.95	52.97	125.1	126.74	3.26	2.75	2.6	20	21.08	24.77	0.88	1.15	0.85	26.2	4.87	25.85	4.36
YCR036W	8.62	5.48	10.42	4.41	13.62	12.33	10.99	11.64	13.89	14.22	11.31	12.19	5.56	1.45	6.24	0.85	14.7	10.93	9.97	3.49	3.44	3.99	10.54	11.04	7.48	11.11	31.84	62.95	65.75	3.77	3.48	3.13	11.35	11.71	14.16	1.2	1.29	1.26	16.43	4.41	18.54	3.98
YCR037C	16.49	12.38	14.49	9.22	46.59	41.27	41.84	40	35.46	39.79	34.67	44.17	9.93	5.34	12.98	4.56	32.43	33.51	29.7	13.73	14.92	16.72	30.46	31.73	20.5	35.82	57.3	155.4	176.53	3.81	3.55	3.72	21.14	18.99	26.71	0.9	2.06	1.07	24.67	13.37	28.02	21.32
YCR038C	2.92	0.89	3.44	1.01	12.64	12.13	9.48	10.35	11.42	12.86	8.08	9.42	1.61	0.12	1.46	0.05	8.23	7.68	8.07	0.49	0.72	0.76	3.45	3.63	3.21	3.27	11.68	28.46	30.11	1.04	0.95	0.94	4.33	3.88	4.6	0.2	0.38	0.3	5.34	0.22	7.39	0.67
YCR041W	0.11	0.15	0.08	0.11	0.03	0.23	0.06	0.05	0.18	0.27	0.02	0.11	0.14	0.2	0.09	0.06	0.06	0.02	0.07	0.05	0.04	0.06	0.32	0.27	0.13	0.28	0.9	0.96	1.33	0.07	0.03	0.02	0.2	0.16	0.1	0.02	0.01	0.01	0.22	0.06	0.25	0.14
YCR042C	34.51	24.17	40.31	21.72	78.64	57.33	67	53.96	65.93	73.19	50.88	62.21	20.04	3.04	18.37	1.66	51.72	56.58	57.88	8.88	9.76	9.77	46.85	39.16	42.7	44.75	127.36	284.28	320.5	19.3	20.04	17.68	40.74	39.76	50.21	5.84	8.03	5.51	53.3	19.49	53.14	14.58
YCR043C	6.99	3.31	5.51	2.82	7.22	6.83	5.33	5.03	8.62	7.4	7.23	7	2.87	0.33	3.25	0.25	6.12	4.18	3.64	0.84	0.87	0.65	8.32	7.02	5.19	7.22	14.86	24.28	23.53	0.78	0.62	0.6	4.42	5.23	7.13	0.25	0.35	0.23	6.42	1.19	7.09	1.44
YCR044C	5.11	3.91	6.09	3.06	12.85	12.48	9.97	10.63	11.87	11.61	9.3	9.05	2.72	0.3	3.43	0.25	10.17	9.25	7.84	1.51	1.59	1.42	6.46	6.72	5.85	7.04	14.11	28.94	32.56	1.01	0.61	0.51	4.59	4.88	5.87	0.21	0.38	0.16	6.13	3.01	6.86	1.78
YCR046C	5.52	2.99	6.22	2.15	11.35	11.31	9.19	10.22	15.02	15.5	13.09	10.11	3.94	0.19	3.74	0.09	12.44	10	7.37	1.27	1.24	1.21	5.93	6.45	4.21	5.34	18.7	28.22	25.42	0.44	0.58	0.56	11.34	12.17	12.19	0.23	0.15	0.24	13.01	0.91	15.06	1.55
YCR047C	24.04	16.31	22.71	12.05	46.22	34.55	29.78	26.79	50.98	44.24	36.85	37.76	10.05	2.85	11.69	2.06	27.29	20.61	21.94	4.66	4.79	5.7	26.35	16.73	29.31	26.37	53.26	128.15	135.36	3.82	3.36	4.04	27.28	33.04	35.16	1.66	2.56	1.65	34.89	17.07	30.59	8.44
YCR048W	4.81	2.65	5.75	2.1	14.22	12.93	10.03	9.57	18.35	17.26	12.98	13.54	3.54	0.51	3.12	0.34	7.87	8.61	7.3	0.94	0.9	0.97	5.41	4.05	4.25	3.8	26.95	53.87	60.08	1.81	1.77	2	9.3	10.21	11.46	0.32	0.39	0.33	10.79	0.91	11.37	0.62
YCR051W	11.56	7.22	10.89	5.61	14.49	12.58	11.86	11.11	24.5	19.47	18.78	16.95	5.67	0.56	5.86	0.37	12.04	8.38	9.01	1.49	1.41	1.68	11.44	6.72	10.79	10.69	33.67	53.54	51.75	1.88	2.16	1.46	15.36	17.19	17.72	0.85	1.09	0.93	15.22	1.82	15.26	0.73
YCR052W	20.32	12.27	21.39	10.43	59.34	51.56	46.45	47	62.98	62.99	52.62	52.69	15.4	1.75	13.77	1.06	48.07	41.13	34.04	7.01	6.94	7.57	27.09	20.64	19.9	21.41	82.98	168.03	176.46	5.95	5.9	6.17	31.17	32.3	35.12	1.81	2.94	1.79	33.25	5.69	37.76	6.24
YCR053W	18.81	11.29	19.92	10.61	46.99	40.82	41.87	38.04	54.23	54.47	47.11	52.66	12.78	3.82	10.79	1.81	29.41	29.11	27.31	7.69	8.44	8.78	29.61	27.27	24.98	27.18	97.27	138.2	131.09	10.08	10.02	9.92	23.81	29.85	31.01	5.44	5.27	4.95	27.34	6.99	28.78	8.22
YCR054C	5.59	3.68	6.5	3.16	16.88	12.68	14.47	11.07	13.53	14.52	10.17	12.77	3.06	1.13	2.79	0.63	9.74	8.16	11	1.78	2.04	2.42	5.74	4.83	5.76	6.89	17.21	41	45.31	2.33	2.76	2.62	5.25	4.89	5.97	0.76	1.02	0.95	6.67	1.15	6.66	1.48
YCR057C	43.2	27.18	43.78	24.99	113.8	80.47	90.84	75.68	105.24	102.28	80.55	97.18	16.23	3.51	19.24	2.85	53.76	58.85	60.81	9.53	11.47	11.02	53.02	33.22	50.95	52.27	104.85	243.6	242	15.8	15.13	15.43	38.17	45.4	42.85	6.8	9.22	7.44	43.45	8.79	37.05	5.95
YCR059C	3.39	1.7	3.25	1.41	9.22	6.93	6.32	6.82	11.14	9.43	7.25	8.14	1.95	0.35	2	0.17	6.36	5.09	5.14	0.45	0.92	0.52	3.87	3.04	3.04	3.8	20.31	35.62	36.41	0.68	0.73	0.56	7.72	8.93	10.05	0.22	0.25	0.18	8.88	0.37	10.82	0.56
YCR060W	2.57	1.29	2.63	1.36	2.32	2.93	1.68	2.18	3.86	3.92	2.61	2.37	1.11	0.45	1.33	0.31	2.45	1.64	1.03	0.57	0.54	0.41	3	2.63	1.74	2.69	9.37	14.55	18.35	0.34	0.4	0.28	3.18	3.86	4.29	0.03	0.09	0.01	6.13	0.56	6.23	0.44
YCR061W	5.53	7.64	6.71	7.87	32.45	26.89	28.99	28.1	21.3	23.07	15.57	18.28	8.85	12.52	5.82	4.39	36.77	35.88	35.61	37.91	35.75	42.13	5.03	10.08	3.67	6.29	26.17	44.86	57.07	0.82	0.95	0.73	8.48	6.37	9.34	0.29	0.44	0.27	12.04	12.31	16.42	14.37
YCR063W	4.85	2.44	4.39	2.21	17.51	16.78	15.74	14.92	18.7	23.89	18.02	22.24	2.05	0.22	2.43	0.21	9.91	9.47	7.34	1.04	1.46	1.38	5.17	5.47	4.74	6.14	14.18	31.03	32.77	1.74	1.46	1.49	5.2	5.28	7.03	0.25	0.41	0.38	7.34	1.17	8.37	1.24
YCR065W	23.8	30.47	27.37	28.24	110.33	105.01	117.86	105.16	87.37	100.36	77.12	92.6	21.14	29.89	20.81	14.19	67.06	69.37	68.53	59.36	68.32	67.01	28.97	29.68	25.23	32.86	75.7	175.26	199.43	5.65	4.72	4.91	20.17	14.64	24.97	0.82	1.21	0.77	39.59	43.23	50.72	58.26
YCR066W	4.77	1.99	4.48	1.93	13.22	12.01	10.73	9.96	13.13	13.8	9.84	11.1	1.9	0.43	1.95	0.11	7.93	7.38	7.55	0.57	0.66	0.58	4.02	3.61	3.13	3.42	16.35	39.07	42.36	1.45	1.59	1.47	3.96	4.03	5.55	0.2	0.29	0.24	5.4	0.65	6.46	1.65
YCR067C	19.48	14.99	23.29	13.89	86.28	62.86	70.34	59.88	73.31	81.4	52.56	67.24	15.27	3.1	9.61	0.96	53.4	53.3	56.54	10.3	9.54	9.32	19.04	16.96	17.74	18.67	89.43	202.28	233.32	9.18	9.59	9.14	27.06	27.06	31.03	2	3.71	2.02	33.62	8.35	36.22	11.17
YCR068W	4.75	2.33	5.48	1.8	21.18	15.76	16.15	15.22	17.79	18.43	13.01	13.46	3.31	0.37	3.62	0.25	15.06	12.18	16.63	1.95	1.89	2.27	7.65	6.15	7.57	6.92	27.4	67.69	81.09	1.33	1.36	1.39	11.59	12.07	14.58	0.28	0.86	0.29	14.25	1.21	15.26	1.02
YCR069W	9.58	7.2	10.54	6.47	33.61	27.04	26.96	26.29	32.76	35.08	27.04	29.93	9.14	2.37	7.03	0.95	28.03	24.29	22.43	7.89	7.37	8.41	10.78	10.68	7.85	8.49	46.06	78.47	95.79	3.69	3.38	3.78	15.08	15.7	19.48	1.03	1.21	0.88	18.54	2.44	21.06	4.98
YCR071C	13.49	7.57	12.68	6.12	9.64	10.01	8	9.05	17.67	12.49	13.07	9.77	6.57	0.49	8.18	0.28	12.31	8.32	5.56	1.75	1.51	1.57	10.23	8.74	7.67	7.1	26.58	53.95	58.12	1.87	2.14	1.83	17.22	17.52	20.88	0.91	0.97	0.85	20.35	1.23	23.71	3.14
YCR072C	10.61	8.74	13.36	7.86	30.24	24.16	22.59	21.58	32.03	28.95	24.72	24.27	4.53	0.94	4.9	0.84	15.97	14.2	17.38	2.94	3.45	3.08	12.52	5.72	15.19	12.39	25.31	60.94	61.9	3.76	3.86	4.41	10.21	13.22	14.1	2.1	2.63	1.99	12.31	2.47	11.75	2
YCR073C	5.63	2.53	5.52	2.11	20.41	15.11	14.41	12.31	19.96	21.95	14.41	18.07	1.99	0.12	2.26	0.11	8.49	9	8.82	0.36	0.62	0.43	3.92	2.83	4.1	3.32	27.1	66	70.51	2.99	2.89	3.23	10.18	12.07	13.16	0.33	0.57	0.37	9.55	1.13	10.19	0.94
YCR073W-A	4.64	3	4.76	2.53	8.22	6.93	5.39	5.72	9.4	9.06	7.74	6.47	3.52	0.13	2.66	0.14	7.12	5.04	5.49	0.57	0.85	0.76	3.57	2.63	1.78	2	18.4	33.93	34.8	0.77	1	0.92	7.07	7.38	8.59	0.27	0.18	0.18	8.93	1.23	10.72	1.24
YCR075C	1.52	0.5	1.46	0.6	2.27	1.8	2.03	2.07	2.44	2.02	1.32	1.49	0.84	0.03	0.89	0.05	2.04	1.55	1.55	0.11	0.14	0.22	1.12	1.14	1.16	0.9	7.05	13.43	11.97	0.25	0.1	0.16	2.43	1.98	2.77	0.03	0.06	0.02	3.21	0.37	3.13	0.59
YCR075W-A	2.05	1.2	1.5	0.89	0.97	1.25	1.01	0.94	1.46	1.36	1	1.38	1.18	0.16	0.96	0.05	1.62	0.86	0.8	0.29	0.2	0.19	1.64	2.15	1.05	1.35	6.38	8.28	10.64	0.22	0.19	0.22	3.09	3.21	3.18	0.06	0.1	0.01	3.29	0.11	4.04	0.87
YCR076C	3.26	1.44	3.4	1.06	5.03	4.18	3.94	4.06	4.99	5.3	4.02	3.73	2.12	0.2	2.07	0.15	5.25	3.59	3.4	0.6	0.63	0.47	3.73	3.2	2.31	3.23	12.62	17.77	21.29	0.43	0.44	0.36	5.17	4.88	6.12	0.06	0.13	0.05	7.34	1.04	8.1	1.16
YCR077C	31.47	25.21	36.46	20.28	94.1	76.85	86.17	72.94	90.15	96.71	72.34	82.83	20.49	3.65	20.06	1.94	58.4	63.33	59.22	12.15	13.04	13.29	37.11	31.53	25.7	28.41	124.04	261.12	275.19	10.32	10.76	10.74	45.19	45.32	55.01	4.9	5.97	4.54	51.25	19.62	56.24	16.4
YCR079W	9.42	4.96	10.69	4.37	17.46	15.46	15.25	13.73	19.25	19.04	15.68	14.56	6.2	0.37	6.17	0.19	15.7	11.75	11.47	1.2	1.48	1.55	10.49	9.08	8.09	8.64	35.27	82.33	83.89	2.66	2.38	2.17	15.6	14.7	20.78	0.65	0.73	0.45	19.05	2.21	24.79	2.54
YCR081W	12.35	5.4	13.52	5.37	37.45	29.79	30.15	25.23	30.77	31.8	23.33	29.75	5.83	0.27	5.93	0.19	18.97	19.29	19.14	0.99	1.62	1.81	13.05	10.5	12.55	13.11	40.91	94.87	95.93	4.03	3.23	3.29	11.71	12.54	14.26	0.39	0.86	0.55	16.79	1.23	15.16	1.62
YCR082W	13.89	10.48	15.06	9.38	13.96	12.16	10.76	12.31	18.27	17.02	12.76	12.69	7.64	2.3	8.2	1.62	15.16	11.11	9.36	5.11	5.07	5.37	13.42	11.93	10.67	15.32	40.31	73.56	72.54	3.35	3.48	3.16	13.05	13.96	16.91	0.83	0.92	0.86	22.37	1.52	20.23	3.27
YCR083W	1.61	0.94	1.51	0.55	2.34	1.88	1.54	1.84	3.07	2.64	2.12	2.47	0.91	0.26	0.91	0.13	2.51	1.55	1.43	0.19	0.24	0.3	1.03	0.87	0.44	0.9	7.24	9.49	9.03	0.31	0.28	0.12	1.56	2.02	2.53	0.05	0.06	0.05	2.91	0.09	2.85	0.11
YCR084C	97.31	83.09	106.4	65.9	377.66	310.66	313.68	291.61	327.29	366.29	285.65	331.52	82.48	46.7	65.18	17.86	274.52	273.93	244	107.52	98.73	110.58	134.71	120.56	102.15	122.41	409.4	917.96	1006.67	28.41	28.06	28.51	151.76	160.32	182.44	10.87	23.66	11.55	180.86	53.32	196.73	95.78
YCR086W	4.75	1.86	4.56	1.6	5.29	4.28	4.55	4.91	5.77	6.79	6.16	4.68	2.19	0.17	2.48	0.17	5.21	4.34	3.52	0.7	0.58	0.6	5.11	5.4	3.61	5.31	10.19	24.68	22.97	0.43	0.36	0.39	6.19	6.8	8.16	0.12	0.2	0.08	8.8	0.69	9.94	0.95
YCR087C-A	15.99	7.26	14.21	5.08	17.22	15.46	10.06	10.84	24.8	21.23	21.37	19.37	5.03	0.38	6.71	0.3	11.27	6.91	7.13	0.76	0.92	0.86	16.69	10.42	14.61	16.01	23.63	45.58	39.84	1.04	1.07	0.97	11.68	13.57	15.07	0.43	0.79	0.38	13.28	0.61	12.23	0.44
YCR088W	17.22	12.67	22.01	11.42	39.98	35.32	35.02	32.1	37.58	35.93	28.2	30.6	17.06	3.14	11.47	1.38	35.01	33.47	37.35	7.64	7.3	8.26	21.77	19.45	15.14	14.98	159.65	207.02	231.92	14.7	14.39	15.27	33.26	36.16	42.9	4.66	6.93	5.02	44.23	8.76	49.56	7.52
YCR089W	17.13	14.89	23.1	10.76	143.99	105.11	107.36	99.35	199.29	260.92	190.53	231.71	13.75	7.46	13.4	4.31	89.03	99.52	99.22	38.73	36.98	46.21	19.47	17.81	20.36	24.32	48.26	116.81	121.14	10.42	10.02	10.09	18.19	15.61	21.79	4.42	5.39	5.07	19.73	7.33	23.51	15.53
YCR090C	4.15	2.06	4.44	2.02	7.56	6.38	5.22	4.89	7.86	7.62	5.8	6.25	2.27	0.1	1.94	0.11	6.02	4.95	4.15	0.57	0.62	0.43	5.37	5.05	5.45	5.5	13.4	25.08	27.24	0.67	0.54	0.88	5.23	5.19	6.28	0.19	0.25	0.16	6.58	1.56	7.69	1.27
YCR091W	2.7	1.54	3.6	1.23	13.64	12.36	12.21	11.53	13.86	15.74	9.9	10.4	3.87	0.38	2.26	0.12	10.31	10.18	9.78	0.8	1.1	1.29	4.1	4.48	2.36	2.98	24.37	47.75	56.51	1.61	1.3	1.82	4.05	4.47	5.16	0.19	0.27	0.23	12.25	0.35	17.08	1.22
YCR092C	11.46	7.47	11.94	6.63	23.57	19.74	20.7	16.81	23.06	19.18	14.83	18.2	5.71	1.19	5.7	0.81	13.14	13.29	16.26	2.82	3.18	3.58	11.97	10.82	10.49	10.48	35.35	87.79	88.02	4.46	4.45	3.95	10.76	11.19	13.87	0.71	1.78	0.83	14.65	2.71	16.42	2.51
YCR093W	155.89	98.63	155.77	85.29	340.47	278.11	304.58	260.89	284.65	318.85	243	309.67	94.92	20.76	100.16	11.3	219.16	245.73	220.4	44.62	46.81	49.68	215.78	208.97	147.76	187.81	438.14	1041.2	1082.71	34.1	32.94	32.17	151.32	152.76	185.82	11.17	21.89	11.15	193.44	41.09	208.31	72.17
YCR094W	3.35	2.5	4.02	1.8	8.09	5.93	5.36	5.07	7.18	6.18	5.22	5.16	2.54	0.09	1.61	0.07	4.81	4.43	4.65	0.55	0.72	0.84	2.83	1.8	2.43	2.17	16.16	31.52	36.13	1.42	1.4	1.35	4.98	5.47	6.14	0.49	0.76	0.58	6.53	1.17	8.02	0.68
YCR095C	9.82	8.01	10.35	6.6	13.75	12.53	10.79	10.88	12.7	12.84	9.79	12.24	3.66	0.48	5.26	0.52	10.78	9.75	9.38	1.91	2.28	1.92	8.42	5.72	6.97	8.43	28.82	65.44	72.54	3.02	2.85	3.35	9.28	9.19	10.37	0.66	1.24	0.52	8.91	2.77	13.62	4.57
YCR095W-A	0.4	0.28	0.35	0.25	1.03	1.13	0.93	1.03	0.98	1.04	0.69	1.14	0.16	0.06	0.19	0.02	0.81	0.89	0.63	0.18	0.2	0.15	0.31	0.3	0.3	0.15	1.31	4.58	5.88	0.25	0.17	0.23	0.66	0.33	0.77	0.06	0.09	0.09	0.51	0.22	0.58	0.13
YCR098C	0.19	0.11	0.18	0.1	0.26	0.45	0.43	0.37	0.33	0.45	0.18	0.24	0.03	0.1	0.08	0.12	0.26	0.34	0.54	0.75	0.38	0.78	0.05	0.05	0.06	0.01	3.1	4.5	6.51	0.61	0.68	0.44	0.15	0.16	0.14	0.08	0.07	0.07	0.38	0.71	0.45	0.92
YCR099C	0.34	0.31	0.76	0.27	1.47	1.18	1.3	1.22	1.61	1.46	0.8	1.38	0.26	0.06	0.25	0.02	0.76	0.64	1.03	0.08	0.06	0.11	0.27	0.18	0.27	0.28	2.65	6.67	5.67	0.89	0.76	0.63	0.7	0.7	1.17	0.13	0.26	0.29	0.7	0.3	0.71	0.14
YCR100C	0.57	0.38	1.07	0.45	2.32	2.08	2.35	1.79	2.32	2.85	1.67	2.55	0.37	0.04	0.42	0.06	1.13	1.07	1.2	0.23	0.04	0.15	0.45	0.39	0.6	0.37	4.37	11.9	11.55	1.33	1.16	1.15	1.19	1.03	1.74	0.33	0.56	0.37	1.11	0.19	1.36	0.27
YCR101C	1.59	0.82	1.44	0.73	3.16	2.43	3.07	2.64	3.88	3.14	2.59	3.35	0.53	0.06	0.95	0.09	1.96	1.68	1.57	0.11	0.04	0.06	0.8	0.64	0.38	0.76	4.37	10.21	14.14	1.28	1.3	1.12	1.46	1.75	2.09	0.27	0.79	0.43	1.84	0.33	1.84	0.17
YCR102C	25.95	32.39	37.47	36.15	33.66	25.84	25.22	22.84	37.42	44.03	38.99	47.84	1.19	1.16	17.14	12.62	43.64	45.03	29.82	30.86	33.67	33.78	59.11	42.11	54.62	61.43	162.56	346.1	348.3	3.99	4.59	3.96	77.42	149.43	128.02	2.29	8.34	2.68	38.54	9.35	40.46	8.2
YCR104W	0.55	0.57	0.57	0.53	1.34	1	1.25	1.03	1.36	1.65	1.41	1.57	0.05	0.05	0.31	0.12	1.28	1.2	0.87	0.63	0.63	0.56	0.61	0.89	0.61	0.94	3.21	6.03	7.07	0.27	0.28	0.29	0.95	1.25	1.74	0.02	0.04	0.04	0.97	0.09	0.78	0.52
YCR106W	7.71	5.08	9.64	5.88	28.58	21.26	24.5	20.16	27.57	30.5	23.58	31.03	1.94	0.2	3.93	1.51	13.61	15.45	15.53	3.39	4.07	4.55	14.3	10.91	13.76	16.45	34.64	83.53	87.74	3.1	2.54	2.53	11.74	11.93	13.77	0.56	1.02	0.54	7.48	1.04	7.72	0.73
YCR107W	2.93	1.99	3.94	2.11	10.17	7.18	9.71	7.62	9.73	12.09	9.26	10.64	0.9	0.08	1.79	0.58	4.64	4.84	4.83	0.89	1.56	1.42	4.98	4.59	5.76	7.18	11.68	28.46	30.81	1.07	1.1	0.97	3.93	3.77	4.42	0.24	0.33	0.24	3.43	0.48	2.52	0.24
YDL001W	10.34	6.87	11.78	6.34	21.02	18.34	18.21	16.39	19.1	22.91	17.09	19.37	4.98	0.94	5.91	1.21	13.67	11.04	13.21	3.83	4.1	4.08	12.71	13.05	12.67	14.62	31.09	71.71	70.23	1.89	1.75	1.65	12.82	12.19	15.88	0.32	0.68	0.34	15.14	6.01	16.32	5.46
YDL002C	8.59	4.77	7.92	4.07	10.61	11.21	8.29	8.47	12.65	12.92	11.49	12.29	4.7	1.2	4.89	0.98	8.78	8.2	6.19	2.52	2.18	2.98	13.58	11.78	8.52	11.21	24.3	48.96	53.92	1.05	1.08	1.13	10.79	10.84	11.95	0.26	0.52	0.34	13.71	3.37	15.46	5.55
YDL003W	50.47	64.24	53.3	63.68	156.71	150.39	165.5	154.63	96.35	103.43	89.9	106.7	33.97	54.76	37.44	29.28	90.32	91.61	75.76	81.15	103	96.43	64.14	66.28	47.15	69.34	130.05	339.11	375.68	6.42	5.88	6.27	57.63	42.98	66.89	1.1	2.08	0.99	72.51	38.71	86.74	60.87
YDL004W	15.76	10.26	14.83	8.04	17.44	14.63	13.22	13.41	17.36	16.3	12.76	13.52	11.28	4.32	7.71	1.62	17.89	12.81	12.48	5.52	5.28	5.7	21.42	21.42	13.96	23.85	47.14	71.07	72.12	2.72	2.76	3.06	12.41	13.71	15.31	0.85	1.47	0.87	17.92	2.27	18.69	4.12
YDL005C	32.59	27.38	30.08	21.22	53.7	42.4	39.61	39.93	44.15	45.25	36	40.26	19.21	5.39	20.29	3.32	41	30.74	36.53	10.69	12.95	12.79	40.52	37.2	34.03	41.1	105.41	283.56	301.38	9.15	10.63	9.55	44.51	48.56	58.51	3.35	5.94	3.46	54	4.31	60.91	13.07
YDL006W	5.86	3.82	7.73	3.3	10.9	7.25	8.5	8.1	12.05	10.68	7.58	9.71	3.93	0.77	2.91	0.31	6.7	5.84	8.09	1.67	1.89	1.25	7.05	6.72	7.7	8.78	16.35	40.04	37.88	1.22	1.49	1.42	6.93	7.47	8.3	0.34	0.65	0.38	10.15	3.14	11.32	3.43
YDL007W	48.14	33.92	55.49	29.82	66.13	52.01	53.87	51.27	72.38	64.56	47.89	54.28	30.71	8.3	28.04	4.66	58.87	47.19	50.79	15.82	16.04	15.83	71.32	62.97	52.26	67.5	169.35	314.59	358.66	8.41	7.46	7.55	58.3	57.07	73.29	2.44	5.65	2.23	77.67	40.2	86.89	33.08
YDL008W	3.55	1.49	3.64	1.62	4.9	3.75	3.1	3.7	5.72	4.69	3.77	3.51	1.53	0.25	1.99	0.13	3.42	2.32	2.28	0.63	0.65	0.43	3.12	2.67	2.51	2.83	9.22	18.41	18.14	0.72	0.7	0.79	3.25	3.81	4.72	0.33	0.26	0.24	4.91	0.26	5.09	0.59
YDL010W	6.28	4.81	6.15	3.66	7.9	6.53	6.15	6.06	7.91	6.23	5.09	7.02	5.25	1.55	4.84	0.74	5.79	4.23	4.39	1.91	2.35	2.18	10.33	10.45	5.34	9.6	21.2	38.43	40.96	2.21	1.9	1.83	9.91	10.29	11.85	0.66	0.81	0.65	14.19	4.56	16.19	7.5
YDL012C	25.11	22.7	23.84	17.36	31.92	29.39	24.88	26.56	41.68	40.67	37.61	31.48	15.83	8.49	17.8	4.07	33.45	24.4	16.26	15.5	12.65	13.83	23.28	19.29	14.75	18.3	55.58	102.26	102.45	4.15	4.77	4.38	28.66	35.78	37.73	2.02	2.14	1.87	30.87	2.77	33.49	7.09
YDL013W	19.39	11.84	21.35	9.15	56.44	44.55	46.33	43.62	55.19	52.42	41.54	44.12	8.89	1.48	12.26	1.34	37.37	31.88	38.1	6.83	7.04	8.03	18.8	16.17	20.89	19.58	63.08	162.48	176.39	6.97	6.8	6.54	25.97	22.68	31.67	2.57	3.68	3.26	32.3	3.4	36.09	3.59
YDL014W	42.86	35.11	43.1	30.79	108.72	93.4	89.27	86.26	120.51	114.64	103.4	108.94	24.41	14.78	24.97	8.59	75.46	72.89	75.33	35.11	34.07	39.37	66.81	53.48	47.56	54.99	108.69	183.78	193.55	7.18	7.5	7.06	40.16	43.61	47.33	4.13	6.47	4.45	42.13	11.97	38.89	11.63
YDL015C	8.45	5.37	8.12	4.76	15.72	12.01	11.42	10.81	11.04	13.42	11.02	13.54	4.47	1.39	4.71	1.14	8.97	9.36	7.95	3.33	3.72	4.66	10.49	12.3	8.77	12.59	25.05	37.63	42.64	2.53	1.82	1.94	6.07	6.26	6.81	0.77	0.91	0.71	7.39	0.95	7.64	1.76
YDL017W	3.72	1.8	4.2	1.86	8.77	7.78	8.23	7.51	8.57	8.39	6.18	7.66	1.66	0.1	2.12	0.09	5.59	4.73	5.58	0.42	0.46	0.43	5.08	3.71	4.15	4.5	15.83	32.88	34.59	0.93	0.59	0.77	4.56	4.81	5.29	0.07	0.31	0.1	6.72	0.87	6.66	1.27
YDL018C	3.63	1.45	3.82	1.64	4.48	4.18	4.18	4.25	3.83	4.18	4.15	3.51	2.95	0.19	2.16	0.24	4.21	2.73	3.35	0.63	0.77	0.82	5.4	6.06	3.75	4.95	11.09	21.87	20.59	0.97	0.83	0.63	4.33	4.45	5.51	0.18	0.18	0.2	7.48	0.91	8.02	1.49
YDL019C	23.83	13.24	32.52	13.4	50.25	41.07	46.53	42.04	46.45	46.08	34.2	39.81	28.54	11.39	16.3	3.19	40.54	39.92	44.65	12.46	12.3	12.92	37.26	44.33	22.01	32.58	128.25	236.85	279.4	12.09	11.48	10.62	38.28	41.97	51.89	3.1	4.22	3.58	58.86	22.94	64.09	30.91
YDL020C	120.82	175.34	137.01	144.89	182.15	151.86	152.51	142.49	176.01	187.35	149.93	176.66	30.71	58.14	74.12	73.76	178.48	153.12	178.42	171.48	198.46	213.01	135.85	150.48	112.28	149.43	122.32	264.82	293.12	27.87	27.94	26.02	94.3	84.32	104.18	25.43	46.36	19.91	97.18	149.47	122.22	195.73
YDL021W	0.5	0.47	0.9	0.57	2.29	2.33	2.15	2.48	1.08	1.23	0.85	0.64	2.27	2.7	0.6	0.36	3.49	2.16	2.42	2.77	2.89	3.95	0.66	0.41	0.28	0.28	9	15.6	16.88	0.47	0.38	0.56	2.26	1.63	3.61	0.02	0.1	0.04	8.42	1.9	10.27	3.86
YDL022W	41.87	72.87	60.36	76.02	119.76	114.19	125.43	138.42	67.04	70.77	44.7	48.4	76.23	120.85	67.86	55.28	365.74	227.47	318.77	408.19	312.71	504.72	58.37	84.78	23.8	44.48	124.93	214.9	253.42	2.24	2.07	1.84	40.72	30.99	43.46	0.33	0.6	0.3	86.57	119.48	108.18	175.1
YDL025C	39.86	57.49	52.26	50.26	153.63	134.45	161.47	147.95	109.25	148.28	132.46	153.85	12.29	7.84	45.24	34.46	193.39	176.93	165.15	172.49	149.99	202.74	81.52	80.27	77.63	107.87	144.23	311.61	350.89	6.15	6.49	5.54	55.19	67.36	64.71	1.07	2.05	0.95	67.68	25.49	70.09	45.98
YDL027C	5.69	4.93	6.94	4.22	13.96	12.71	12.76	11.23	12.27	13.05	8.81	11.95	4.89	0.88	4.18	0.41	13.89	12.34	11.38	3.46	3.99	4.25	6.14	7.68	4.19	6.02	23.7	55.63	59.38	2.18	2.2	1.66	8.6	9.08	11.48	0.69	0.79	0.55	12.36	2.19	14.78	4.57
YDL028C	14.26	10.83	16.11	9.51	41.09	35.3	40.56	35.5	41.08	44.16	35	40.84	8.48	0.88	8.72	0.65	25.08	26.2	27.29	3.93	4.59	4.66	16.1	14.36	13.12	16.01	50.88	128.55	131.65	6.41	5.88	5.66	18.05	19.12	24.47	2.65	3.76	3.02	20.1	5.71	23.68	5.74
YDL029W	15.37	14.23	16.4	13.13	14.99	12.73	15.98	12.79	15.98	15	12.38	16.2	10.72	4.59	8.91	5.13	14.68	13.5	14.97	9.05	10.2	10.14	23.73	22.88	17.38	25.45	63.98	109.82	113.79	4.15	4.46	3.84	25.66	28.52	32.81	1.95	3.07	1.9	29.95	12.2	31.65	11.22
YDL030W	12.93	6.07	12.86	4.38	25.55	19.96	18.15	17.47	20.14	23.57	17.04	19.9	4.64	0.12	6.13	0.18	15.99	15.41	14.1	0.73	1.17	0.93	13.16	10.33	11.17	14.01	29.45	76.94	74.51	2.22	2.31	2.21	13.99	14.63	16.89	0.41	1	0.53	15.68	1.47	16.77	1.81
YDL031W	40.65	24.21	41.52	20.46	95.37	72.94	78.31	66.65	103.4	106.2	82.61	105.74	20.32	2.68	18.43	1.86	48.51	48.51	52.25	6.09	7.13	6.73	43.48	28.78	44.42	49.07	118.03	259.68	268.75	14.21	13.53	13.54	34.83	46.81	44.82	5.13	7.59	5.48	47.2	5.76	37.4	4.92
YDL033C	8.32	7.39	8.57	5.98	17.62	15.68	14.26	14.51	20.16	19.34	15.48	16.58	3.89	0.58	4.56	0.44	14.12	11.38	10.96	2.95	2.76	2.85	9.48	7.75	8.13	10.12	22.99	50.25	60.57	2.97	2.58	2.85	10.4	10.15	12.39	1.13	1.96	1.14	9.9	1.9	11.15	2.89
YDL035C	18.93	16.55	26.46	14.5	64.03	45.75	56.31	45.74	49.07	53.7	37.52	44.97	15.59	6.94	11.43	3.22	38.34	39.01	48.66	13.26	13.26	15.17	31.72	27.41	28.53	31.34	92.05	241.83	272.11	7.91	7.7	7.36	37.37	37.3	48.61	2.24	4.43	2.54	45.55	17.18	51.05	18.96
YDL036C	11.69	5.28	13.93	4.46	26.71	23.06	21.17	18.57	26.03	27.25	19.25	25.68	4.64	0.5	5.15	0.19	14.59	13.86	12.32	0.89	1.18	1.04	12.61	8.76	9.66	10.12	37.44	87.47	96.7	3.09	3.19	2.83	12.37	15.68	16.75	1.01	1.4	1.08	16.7	1.84	13.59	1.32
YDL037C	23.64	21.74	34.52	25.71	90.42	62.51	66.92	48.49	74.07	110.8	70.54	104.17	6.86	5.08	4.76	2.47	39.52	56.51	43.1	22.28	22.2	26.86	9.35	4.83	6.97	3.78	17.32	29.99	34.59	1.27	1.12	0.88	0.87	1.88	1.26	0.34	0.16	0.23	2.56	0.46	2.12	0.4
YDL039C	48.79	44.99	64.03	43.79	195.71	111.57	114.64	81.12	220.01	279.94	211.37	275.51	10.76	10.38	8.07	3.37	84.24	103.61	95.32	34.19	31.62	44.12	11.31	3.55	16.42	6.44	19	41.89	38.58	5.03	4.83	4.56	3.03	4.19	3	1.59	1.53	1.63	4.16	0.8	2.9	0.49
YDL040C	12.83	8.38	16.26	7.59	50.59	34.85	42.36	34.55	42.57	41.05	32.52	39.06	11.59	1.92	7.66	0.69	25.14	26.72	30.19	4.25	4.37	4.96	18.12	15.59	15.3	17.04	79.43	153.31	155.8	7.21	6.11	6.54	19.32	23.17	24.69	1.91	2.87	1.82	25.93	8.31	28.53	7.36
YDL042C	9.29	5.51	8.58	4.27	40.19	34.37	31.72	30.83	26.94	28.29	26.64	28.79	4.61	1.11	6.84	0.78	24.29	21.93	18.98	4.04	4.47	4.4	12.97	12.07	10.62	14.08	25.05	58.37	60.92	1.77	1.83	1.77	8.38	8.54	13.22	0.17	0.54	0.24	14.3	1.19	13.17	2.67
YDL043C	5.29	2.69	5.92	2.5	10.43	8.18	8.87	8.2	10.86	10.97	8.25	10.75	2.28	0.17	2.74	0.12	7.55	5.7	6.43	0.73	0.92	0.6	6.33	5.01	5.46	6.14	15.38	34.25	33.96	1.1	1.32	1.27	5.52	6.02	6.78	0.32	0.52	0.35	6.18	0.71	6.86	1.46
YDL044C	6.09	3.56	6.42	2.94	10.25	8.73	11.05	9.62	10.69	10.79	8.41	9.37	2.68	0.18	3.43	0.16	8.44	6.73	7.09	0.8	0.83	0.88	7.37	5.99	5.98	7.61	19.6	40.84	40.12	2.56	2.26	2.62	6.36	6.17	7.27	0.81	1.08	0.84	8.15	2.68	9.71	2.89
YDL045C	5.66	2.87	6.3	2.72	12.27	9.81	9.02	9.07	10.79	10.95	8.68	7.85	3.56	0.15	3.19	0.12	8.93	6.09	7.11	0.6	0.85	0.67	7.49	6.59	7.11	7.7	22.4	42.69	50.42	1.17	1.1	1.1	7.39	7.86	10.92	0.27	0.34	0.3	9.36	1.56	9.86	1.19
YDL045W-A	14.16	11.49	11.86	8.94	10.75	10.58	8.09	9.53	14.36	12.01	12.36	12.56	7.25	4.4	7.92	3.03	12.21	9.2	7.18	6.85	7.35	8.03	16.55	18.86	10.44	16.28	27.7	48.64	57.21	2.28	2.27	1.97	13.67	14.49	17.3	0.65	0.78	0.7	19.75	1.71	22.45	7.36
YDL046W	19.4	14.19	18.97	11.5	49.3	42.45	37.43	40.94	44.66	49.99	39.98	43.24	15.37	8.77	12.56	3.7	49.32	36.67	30.05	18.9	16.51	17.99	27.23	26.41	15.68	23.77	69.65	105.48	124.64	5.02	4.73	4.82	25.73	26.5	32.26	2.33	3.1	2.44	40.61	6.69	41.57	7.95
YDL047W	23.74	16.51	24.7	13.93	60.84	55.21	50.27	48.9	59.4	58.52	49.21	56.73	14.68	7.65	15.25	3.42	47.07	45.31	38.05	18.97	18.4	20.3	33.85	32.99	24.68	32.29	70.85	160.15	171.7	5.29	4.99	5.11	27.35	27.69	33.27	1.65	2.46	1.65	32.28	11.68	34.5	15.31
YDL048C	36.71	51.27	76.88	82.8	452.48	364.14	326.32	303.83	263.48	438.98	289.33	417.39	99.23	113.72	34.62	18.68	303.93	277.32	222.6	275.87	204.9	322.69	80.96	78.15	20.73	27.25	104.96	219.08	254.96	4.27	3.29	2.94	4.66	5.37	7.45	0.17	0.38	0.13	37.32	19.54	43.71	53.2
YDL049C	0.83	0.43	0.77	0.42	3.53	3.25	2.46	2.36	3.7	4.61	3.64	3.43	0.44	0.23	0.4	0.07	2.19	1.39	1.88	0.52	0.42	0.8	0.55	0.57	0.39	0.78	7.99	14.31	15.62	0.47	0.4	0.27	1.31	1.7	1.96	0.09	0.06	0.1	3.02	0.48	3.18	1.19
YDL051W	22.92	14.02	20.07	11.25	42.64	36.82	32.53	32.42	45.77	43.23	40	44.14	10.63	2.98	13.43	2.25	28.82	23.13	21.33	7.37	8.63	9.1	35.7	27.23	29.83	43.21	54.05	83.61	80.53	3.09	2.83	2.72	19.68	24.39	23.74	1.77	2.18	1.71	27.15	3.92	24.69	3.71
YDL052C	14.29	11.37	14.66	9.05	28.58	22.06	23.72	23.49	40.42	35.29	28.78	28.31	14.1	6.02	8.74	2.03	22.82	18.59	20.25	9.7	8.48	10.29	17.59	15.52	15.17	16.61	53.71	112.63	127.72	5.06	5.04	5.05	22.15	25.57	29.22	2.17	3.87	2.54	34.43	4.96	38.69	6.62
YDL053C	11.73	8.44	13.32	6.8	23.97	21.01	19.57	18.28	26.08	26.9	22.49	22.54	8.46	1.97	6.4	1.11	20.22	14.91	14.55	5.27	5.25	6.02	13.61	11.62	10.58	11.48	40.28	80.07	88.44	3.75	3.89	3.54	13.75	14.19	16.93	1.43	2.62	1.7	17.81	4.46	19.87	7.16
YDL054C	4.18	1.95	3.93	1.59	12.62	11.01	10.5	9.37	12.8	15.9	14.41	13.84	2.07	0.15	2.75	0.19	8.25	7.11	6.31	0.62	0.79	0.91	5.8	4.76	5.12	7.56	15.04	33.2	31.79	0.93	0.8	0.89	4.22	4.96	5.87	0.04	0.22	0.24	5.07	0.39	6.53	0.73
YDL055C	32.9	44.53	40.46	41.68	108.83	85.73	98.17	94.2	94.38	86.14	66.28	78.1	37.24	51.33	21.12	20.33	91.51	82.68	106.96	100.12	92.88	114.77	40.57	38.04	37.73	39.65	136.54	224.79	246.06	3.06	3.16	2.47	35.52	38.13	46.7	1.5	3.17	1.53	61.96	64.35	60.76	54.31
YDL056W	28.8	19.42	33.05	17.26	97.84	77.67	84.26	76.32	84.7	92.8	68.11	80.44	18.14	1.99	18.3	1.11	60.99	60.98	59.5	8.94	10.21	9.97	39.08	36.62	31.16	36.16	109.63	264.18	293.19	9.9	10.1	9.67	36.41	38	49.64	3.69	5.99	3.93	49.63	8.76	54.48	13.37
YDL057W	1.98	0.93	2.15	0.65	5.06	6	4.99	4.91	4.99	4.42	3.17	3.62	1.32	0.15	0.95	0.16	4.59	3.64	3.92	0.58	0.51	0.65	1.69	1.62	1.4	1.79	8.73	19.29	20.59	0.4	0.35	0.23	3.52	3.37	4.37	0.03	0.07	0.01	5.96	0.99	6.53	0.86
YDL058W	41.57	20.99	45.53	18.89	86.86	66.24	74.25	62.63	71.98	74.87	55.19	67.11	25.78	1.67	21.63	1.15	53.49	54.33	60.32	5.68	6.14	5.59	62.07	45.25	52.82	59.01	173.12	330.43	350.12	15.19	14.85	14.82	53.37	55.56	64.34	3.65	4.72	4.12	71.59	11.03	71.23	10.72
YDL059C	6.36	2.77	5.64	2.16	5.35	6.08	4.73	5.26	6.28	5.41	4.31	3.81	1.08	0.03	2.63	0.23	6.06	4.86	5.35	1.77	0.73	1.21	13.74	7.89	11.37	10.29	7.8	19.46	20.1	0.32	0.33	0.28	5.66	5.05	5.57	0.08	0.17	0.04	4.13	0.15	6.18	0.08
YDL060W	36.64	17.24	39	15.43	111.51	84.22	84.52	73.2	101.56	100.9	83.94	92.94	16.41	1.98	20.92	1.68	54.13	53.12	47.96	7.2	8.52	9.34	45.82	32.88	45.09	49.14	79.88	181.29	173.87	8.26	7.77	7.78	29.03	35.28	35.22	3.02	4.84	3.86	35.51	5.54	30.87	4.25
YDL061C	41.49	33.01	30.48	26.74	13.88	13.58	11.1	12.9	14.59	11.4	13.63	14.08	18.26	15.62	22.68	11.39	13.23	11.32	7.95	8.47	9.62	10.36	60.77	69.36	32.22	66.1	127.02	85.38	97.96	8.21	7.7	7.88	34.09	34.64	37.16	4.47	4.83	4.04	38.13	2.08	44.09	10.69
YDL063C	10.51	5.53	9.65	5.05	26.42	19.01	20.56	17.84	24.47	24.4	19.12	24.48	3.3	0.56	4.56	0.65	12.63	12.25	13.58	1.31	2.04	1.81	13.06	6.84	14.96	15.55	22.28	46.07	39.14	3.4	3.05	3.17	7.19	11.35	10.59	1.77	1.82	1.82	10.07	1.04	6.46	0.57
YDL064W	8.6	5.05	8.66	4.57	10.67	8.45	7.31	8.52	10.84	10.2	9.15	10.11	5.35	0.64	5.35	0.51	9.08	6.75	5.65	1.85	1.83	2.09	13.82	13.88	7.64	10.55	25.16	43.09	39.56	1.68	1.73	1.36	8.69	10.31	11.71	0.76	0.73	0.75	11.74	1.78	11.8	2.54
YDL065C	23.86	16.7	25.48	15.67	36.9	29.57	29.2	30.21	32.84	31.32	26.17	28.47	14.74	6.55	14.09	3.83	32.18	24.18	25.27	10.39	11.72	12.34	29.98	28.24	25.02	33.26	65.47	141.74	144.53	4.68	4.4	4.14	26.41	30.6	33.88	1.45	1.71	1.57	38	7.79	38.82	9.03
YDL066W	8.95	7.2	8.03	6.09	27.87	23.16	26.12	25.81	27.92	27.81	26.66	30.81	6.98	6.88	5.96	4.16	18.91	15.95	16.24	14.44	13.8	15.49	11.2	10.58	9.95	14.26	95.85	98.73	92.36	11.57	10.74	10.99	16.28	19.54	22.48	5.09	2.55	5.35	25.53	9.15	26.26	7.82
YDL067C	12.38	9.14	10.61	7.48	10.32	8.98	8.87	9.92	10.69	11.35	10.8	10.19	7.48	5.62	6.86	2.79	10.89	7.32	5.72	6.41	7.24	6.86	15.26	17.21	10.4	14.89	30.35	38.59	29.62	2.22	2.23	2.46	7.22	8.24	8.47	0.42	0.33	0.54	10.09	1.38	11.05	4.38
YDL069C	2.69	0.77	2.11	0.75	3.82	4.38	3.31	4.29	4.18	4.58	4.37	4.82	0.69	0.03	1.37	0.06	3.61	2.5	2.42	0.42	0.48	0.41	3.58	2.77	2.86	3.72	5.75	14.07	13.79	0.56	0.49	0.57	2.26	2.54	2.94	0.13	0.11	0.1	3.1	0.04	3.1	0.06
YDL070W	105.84	205.93	131.71	193.34	136.9	124.15	143.66	122.97	172.08	202.19	10.62	11.23	7.36	7.33	8.71	3.1	160.12	174.12	143.65	252.41	265.64	254.24	113.67	124.21	76.17	114.28	317.76	782.73	847.57	29.68	28.94	25.98	98.87	101.71	130.99	2.08	3.65	2.14	31.06	6.6	34.63	17.2
YDL072C	4.51	3.33	5.1	2.88	7.9	7.05	6.9	6.08	8.01	9.3	6.78	8.22	5.42	3.7	3.75	1.28	8.04	5.02	4.65	3.39	3.24	3.08	6.81	7.77	4.06	5.97	18.89	34.57	35.08	1.1	0.95	0.82	6.95	6.94	8.59	0.35	0.34	0.23	11.44	2.32	10.79	4.33
YDL073W	13.23	9.56	16.57	8.45	31.18	23.19	25.34	20.2	29.41	28.31	23.8	26.56	8.38	1.69	6.95	1.06	19.25	17.22	20.55	3.65	4.56	4.23	13.21	10.17	12.9	12.99	44.31	94.87	96.49	8.32	8.22	7.35	13.73	13.15	16.16	2.09	3.17	2.41	18.76	5.48	19.55	3.74
YDL074C	27.95	21.13	29.4	18.46	46.14	37.92	45.4	35.68	50.48	48.4	38.77	45.82	14.98	5.19	14.91	2.99	31.01	29.52	32.35	9.05	9.54	9.3	34.7	31	27.91	35.99	84.32	204.45	211.12	13.18	11.65	11.56	33.35	33.58	40.63	6.42	8.46	6.46	36.7	13.33	39.65	14.64
YDL075W	36.85	27.78	34.05	22.65	34.87	30.84	25.51	30.86	32.89	29.62	28.73	28.05	22.08	13.83	21.56	8.89	31.97	23.02	18.86	19.83	21.2	21.14	55.96	54.76	42.85	59.98	157.97	114.16	112.67	10.65	9.92	9.83	31.72	33.16	40.02	4.38	4.53	4.28	45.09	14.43	42.9	15.93
YDL076C	13.01	7.58	13.37	6.16	17.8	16.76	15.8	16.05	18.35	17.95	16.22	16.47	7.97	0.96	10.25	0.85	16.1	12.77	10.42	3.46	3.63	3.54	20.65	20.83	11.11	20.56	32.25	67.85	73.32	1.74	1.96	1.86	13	13.78	17.26	0.56	0.65	0.53	19.32	1.78	21.24	5.51
YDL077C	5.7	2.21	7.27	2.21	21.33	17.51	18.58	15.29	15.7	15.37	12.69	15.73	3.82	0.24	2.82	0.16	11.02	12.36	12.97	1.02	1.03	1.1	8.1	6.56	5.95	6.71	25.68	54.91	61.27	1.65	1.36	1.33	6.49	6.72	7.62	0.19	0.33	0.19	10.25	1.26	11.1	1.43
YDL078C	4.96	3.6	5.59	2.84	9.03	8.76	8.55	7.51	10.41	10.07	7.81	9.69	4.3	2.61	3.3	1.1	7.66	5.73	6.24	2.73	2.42	2.8	6.51	6.72	4.26	6.5	29.34	40.2	44.47	0.51	0.59	0.52	5.06	6.03	7.37	0.19	0.29	0.17	10.36	2.57	11.07	2.62
YDL079C	1.45	1.91	0.93	0.66	2.63	2.18	2.38	1.68	1.84	2.72	1.41	1.7	1	0.88	0.8	0.21	2.96	2.34	2.3	2.56	1.93	3.26	0.74	1.4	0.53	1.26	7.13	15.76	19.61	0.69	1.02	0.86	1.44	1.16	1.84	0.05	0.15	0.13	10.98	2.05	11.63	6.41
YDL080C	5.99	3.46	7.42	3.53	22.18	17.56	18.09	17.04	22.53	21.87	16.6	19.21	4.22	0.52	3.43	0.28	12.31	11.45	11.59	1.36	1.56	2.16	8.55	8.39	7.33	9.13	30.09	65.68	65.47	2.82	2.32	1.9	7.89	8.35	10.75	0.61	1.05	0.77	13.12	3.27	14.33	3.76
YDL081C	27.53	22.18	26.99	20.73	35.19	28.34	30.53	29.73	38.96	32.23	30.34	32.41	15.71	11.8	15.1	7.05	32.24	25.43	22.69	18.5	23.76	25.89	34.75	35.66	20.64	30.83	81.26	64.8	59.31	5.4	6.03	5.2	15.69	16.77	18.15	2.04	1.72	2.06	19.97	21.85	20.81	8.85
YDL082W	25.62	18.8	26.94	17.06	39.56	34.62	31.49	32.76	36.87	37.42	32.68	33.79	16.93	8.33	16.06	5.36	32.63	26.65	22.03	15.71	17.45	19.01	33.72	34.8	22.3	35.3	85.96	90.2	88.72	4.21	4.46	4.3	24.75	26.18	30.44	2.41	2.88	2.47	28.93	7.49	29.96	9.87
YDL083C	20.39	15.85	18.54	13.22	31.18	29.57	27.17	29.73	31.5	22.99	22.93	26.4	14.07	8.82	12.19	4.77	25.12	21.34	21.7	12.09	15.11	16.29	35.65	31.76	24.35	35.06	89.02	79.35	81.93	6.04	5.31	5.64	22.3	23.36	27.32	1.84	3.35	2.36	31.52	4.54	34.33	10.61
YDL084W	24.34	16.69	22.21	14.29	38.66	33.22	30.82	28.68	37.55	39.71	31.97	42.25	19.95	7.84	14.07	3.36	29.88	28.88	28.13	9.17	10.07	9.75	32.49	29.56	24.62	29.36	154.08	178.4	198.17	12.77	11.83	12.23	35.76	38.72	43.26	7.03	7.68	7.63	39.24	11.08	45.65	13.56
YDL085C-A	3.62	1.93	3.56	1.88	6.24	4.35	2.96	4.45	4.41	4.42	3.97	3.78	2.13	0.52	2.15	0.3	6.08	4.39	3.03	1.44	1.28	1.36	4.24	4.32	2.94	4.96	15.79	18.17	21.99	1.64	1.83	1.5	3.88	4.7	5.27	0.47	0.57	0.56	5.67	1.93	6.38	1.55
YDL085W	0.19	0.11	0.18	0.05	0.97	0.78	0.61	0.96	0.3	0.32	0.13	0.27	0.6	0.45	0.15	0.08	1.76	1.25	1.6	1.18	1.2	1.6	0.24	0.23	0.12	0.21	1.53	2.33	2.59	0.51	0.54	0.47	0.36	0.18	0.43	0.1	0.06	0.08	0.73	0.3	1.11	0.27
YDL086W	3.16	2.36	3.31	1.96	6	5.88	4.9	4.82	8.24	6.45	6.56	5.77	3.12	1.58	1.82	0.59	5.36	4.61	4.88	2.56	1.63	1.77	4.23	3.86	2.92	3.8	22.47	29.34	32.77	1.82	1.97	1.62	6.05	6.16	7.9	0.34	0.51	0.27	7.72	0.71	9.16	1.35
YDL087C	7.05	5.28	6.8	4.05	16.14	15.13	11.77	12.49	19.91	17.42	14.52	15.35	3.6	0.64	5.08	0.34	11.83	9.38	8.77	1.72	2.32	2.55	6.96	6.08	4.94	5.58	23.89	54.59	58.61	3.56	3.78	3.38	11.64	10.33	14.03	1.04	1.39	0.86	10.85	1.62	12.08	2.9
YDL088C	42.73	35.27	41.28	29.14	116.75	101.16	95.16	92.67	93.93	119.35	91.89	115.46	18.8	7.31	29.4	5.18	81.05	79.64	68.11	21.87	23.81	23	52.67	53.55	35.41	49.41	95.52	256.54	261.47	18.1	17.13	15.68	41.17	38.9	50.83	6.91	9.74	8.04	47.25	5.91	55.74	20.01
YDL089W	2.03	1.05	2.58	0.95	4.58	3.43	4.09	3.01	4.71	4.08	2.74	3.59	1.84	0.45	1.21	0.18	2.98	2.79	3.38	0.81	0.86	0.95	3.25	2.9	2.17	2.42	12.91	21.06	25.21	0.91	0.7	0.69	3.03	2.96	3.52	0.11	0.15	0.09	5.59	0.5	5.22	0.7
YDL090C	2.69	1.14	3.29	1	5.74	5.43	3.89	4.16	6.02	5.51	4.42	5.03	1.87	0.19	1.06	0.14	4.32	3.64	3.92	0.75	0.62	0.47	4.21	3.63	2.71	4.01	12.77	27.25	29.13	1.11	0.95	1.12	3.96	4.16	4.84	0.11	0.17	0.19	5.1	0.45	5.75	0.48
YDL091C	6.29	3.37	7.02	2.85	16.78	10.71	11.48	11	10.99	11.48	9.15	9.47	4.87	0.34	4.02	0.16	11.78	10.93	10.56	1.18	1.28	1.29	4.69	4.44	4.07	4.29	23.4	48.32	59.03	1.88	1.42	1.63	8.41	8.08	11.26	0.27	0.74	0.26	11.79	3.09	11.96	3.41
YDL092W	15.5	11.92	15.4	9.35	13.64	14.61	11.92	11.92	18.45	19.15	16.42	15.09	9.38	1.78	9.82	1.06	14.02	9.66	8	3.13	3.28	3.93	18.46	17.85	14	19.5	43.22	70.59	65.61	2.71	2.83	2.47	19.9	21.5	25.19	1.47	1.74	1.61	27.04	5.62	28.8	6.82
YDL093W	3.06	1.71	3.76	1.5	11.33	8.91	9.48	8.08	9.88	9.59	7.16	8.97	3.05	1.04	1.49	0.17	5.98	5.93	5.75	0.76	0.79	0.88	3.04	1.85	2.24	2.44	20.01	40.04	42.29	2.04	1.86	1.75	6.1	6.59	7.76	0.85	1.18	0.96	7.93	0.93	8.7	0.79
YDL095W	16.98	11.62	20.69	11.09	52.41	42	45.98	41.33	44.28	44.85	34.35	37.52	16.7	6.44	10.08	1.9	39.62	38.1	40.87	12.38	11.62	13.27	24.55	19.25	19.89	24.04	119.07	188.77	206.5	7.65	7.38	6.41	31.09	29.6	37.29	2.31	4.39	2.34	38.32	18.76	40.88	15.58
YDL097C	43.5	29.22	42.7	24.31	53.89	46.18	46.22	43.72	49.5	56.84	46.04	50.85	24.93	6.79	30.34	4.17	47.77	41.9	40.78	11.86	13.21	13.01	55.72	54.99	31.43	44.87	112.09	227.52	231.92	7.83	7.12	6.83	43.36	43.32	54.36	2.97	3.41	2.74	58.24	16.99	65.3	23.26
YDL098C	4.41	1.72	4.7	1.66	4.16	3.98	3.94	4.16	5.39	4.87	3.61	4.26	2.09	0.08	2.52	0.08	3.72	3.48	2.6	0.29	0.2	0.35	3.87	3.34	2.3	3.98	13.89	28.14	26.33	0.25	0.21	0.14	5.35	4.45	6.02	0.01	0.12	0.05	6.07	0.52	7.39	1.22
YDL099W	48.69	29.83	46.35	20.61	68.21	59.26	51.49	53.77	74.95	73.94	58.91	63.33	27.69	3.36	29.5	1.81	56.19	41.72	40.49	8.55	8.03	8.54	66.28	61.09	46.34	59.14	142.96	285.4	308.67	9.16	8.75	8.45	59.89	65.73	74.02	3.09	5.89	2.97	73.43	9.5	75.59	16.36
YDL100C	14.05	8.27	14.34	6.78	24.92	20.64	20.32	19.61	27.29	25.41	18.65	20.73	7.61	1.23	6.72	0.82	19.93	16.29	17.57	3.28	3.82	3.86	14.56	13.17	10.14	12.11	63.27	73.08	77.59	3.51	2.73	3.22	13.04	14.92	16	0.99	1.36	0.82	16.81	4.37	17.48	3.49
YDL101C	5.64	3.85	6.05	3.73	11.01	8.66	9.8	10.29	9.58	8.34	5.98	7.88	4.85	2.14	4.09	0.86	7.93	7.16	6.87	2.69	3.03	3.26	7.17	6.31	4.84	6.5	30.12	67.37	74.72	2.86	2.81	2.74	10.64	9.79	12.13	0.35	1.36	0.46	17.7	4.31	18.69	7.88
YDL102W	9.02	5.64	11.43	5.1	30.74	22.71	27.4	22.2	22.38	23.68	19.43	23.18	5.63	0.69	5.74	0.45	16.42	18	16.7	1.67	2.21	2.35	12.37	8.73	10.72	11.32	38.93	80.23	90.33	2.36	2.59	2.33	12.2	13.1	15.59	0.32	0.86	0.44	14.65	2.86	13.64	1.95
YDL103C	5.64	2.5	6.81	2.3	17.54	14.68	13.4	12.35	13.73	14.68	10.82	12.93	4.27	0.24	3.1	0.12	11.89	11.32	9.71	1.18	1.31	1.57	7.01	6.58	5.39	5.65	29.04	48.32	53.01	1.29	1.31	1.12	7.44	7.86	9.54	0.21	0.41	0.34	9.8	1.56	10.95	1.52
YDL104C	1.55	0.3	1.62	0.28	3.61	3.68	2.78	2.55	3.98	3.44	2.43	3.25	0.53	0.03	0.58	0.02	1.94	1.45	1.83	0.16	0.13	0.3	1.59	1.39	1.68	1.88	6.68	15.11	16.88	0.15	0.1	0.13	2.26	2.58	2.94	0.04	0.02	0.01	2.51	0.33	2.4	0.17
YDL105W	3.65	2.32	3.63	1.87	9.09	8.91	8.73	7.65	7.11	7.01	6.63	6.04	1.72	0.28	2.48	0.15	5.59	5.5	4.83	0.78	0.79	0.93	3.6	3.68	3.45	4.16	14.3	32.16	32.35	1.4	1.33	1.39	4.5	3.95	5.97	0.25	0.43	0.26	4.8	1.34	6.63	1.63
YDL106C	35.91	30.15	32.64	24.25	85.78	75.22	71.85	72.74	70.09	84.57	66.08	81.32	17.46	3.98	30.07	2.86	71.1	72.91	56.24	15.89	18.19	17.5	36.17	31.64	23.69	27.93	102.31	277.45	302.36	18.44	18.24	16.78	46.06	44.98	56.95	5.83	7.76	6.36	48.41	6.4	62.55	16.99
YDL107W	5.36	2.01	5.72	1.68	8.51	9.11	7.25	8.13	7.76	8.74	5.84	7.13	2.43	0.09	3.37	0.1	6.19	5.57	5.07	0.57	0.61	0.45	7.17	6.99	5.06	7.62	13.81	36.26	31.72	0.31	0.2	0.24	5.27	5.72	8.24	0.09	0.17	0.15	8.61	0.54	9.91	1.49
YDL108W	4.84	2.42	5.49	2.16	8.98	8	7.48	7.67	11.01	10.15	8.05	9.82	2.96	0.17	3.04	0.16	7.17	6.34	5.44	0.88	0.92	0.82	6.36	4.43	4.92	4.77	15.71	32.16	33.75	0.72	0.72	0.61	6.22	5.54	8.47	0.19	0.22	0.3	7.12	0.84	8.63	1.71
YDL109C	3.85	1.94	3.68	1.72	19.7	17.49	14.58	14.24	17.09	18.19	11.73	14.9	1.9	0.23	2.11	0.18	10.95	10.77	10.3	1.15	1.03	1.01	4.31	3.23	3.96	4.1	14.3	33.36	39	3.99	3.29	3.33	5.29	4.03	5.33	1.47	1	1.74	6.15	1.23	7.01	1.73
YDL110C	11.02	13.25	12.48	11.52	16.86	14.53	15.4	16.44	17.11	17.07	13.45	14.05	19.37	23.87	11.05	7.71	25.03	17.52	17.29	27.67	22.71	29.71	11.97	14.4	6.84	10.21	54.31	91.89	110.85	3.35	2.96	2.63	14	13.5	20.68	0.82	0.81	0.91	40.18	24.71	48.58	32.36
YDL111C	10.23	6.05	9.91	5.15	21.83	19.29	19.57	17.08	24.34	25.12	18	20.99	5.43	0.27	5	0.26	13.99	13.66	12.55	2.17	2.07	2.14	12.23	9.97	10.03	10.47	26.13	58.45	57.28	2.21	2.05	2.33	10.33	10.87	11.69	0.63	1.01	0.66	12.25	1.65	13.12	2.16
YDL112W	31.87	22.42	33.06	17.26	85.91	63.39	71.3	58.48	74.82	81.98	62.8	77.62	14.52	1.43	16.31	0.85	44.64	44.92	48.82	3.52	4.59	4.92	30.5	20.3	27.45	28.06	93.17	193.83	193.76	9.07	8.96	9.09	25.61	29.62	31.98	3.18	5.83	3.76	32.49	7.64	30.95	7.47
YDL113C	10.28	6.79	12.29	5.91	21.99	18.91	20.85	19.33	21.32	23.01	17.22	19.93	7.29	0.56	7.92	0.39	17.89	16.77	16.33	3.15	3.11	3.13	13.24	13.24	8.96	12.38	35.8	85.54	92.57	4.48	4.26	4.06	15.26	15.22	19.4	1.43	1.88	1.59	20.05	4.87	24.79	4.17
YDL115C	14.79	10.23	14.02	7.88	16.46	13.56	13.8	13.29	16.46	16.46	13.23	15.62	6.25	1.08	9.45	0.85	12.48	10.93	11.28	2.22	2.28	3.52	15.25	13.7	10.35	14.31	38.52	89.48	82.07	2.83	2.87	2.27	14.09	14.64	19	0.81	1.51	0.9	17.89	3.4	21.16	4.09
YDL116W	36.02	25.59	35.65	21.56	68.11	51.41	56.48	53.13	54.84	65.58	51.95	66.1	13.85	3.33	21.9	2.38	44.55	45.13	39.63	8.63	10.65	10.01	36.34	37.45	27.49	39.54	86.9	202.84	208.25	9.9	9.13	9.38	29.66	30.22	39.29	5.74	7.86	5.67	37.73	9.87	42.6	12.95
YDL117W	14.31	13.87	19.63	14.42	55.49	40.52	45.43	40.57	40.85	44.61	31.81	40.1	10.39	11.93	8.79	5.6	25.48	24.9	30.5	15.32	18.79	18.36	22.48	21.92	20.44	23.41	52.18	122.28	127.23	6.02	5.38	5.68	16.72	15.47	19.56	1.29	2.18	1.12	22.02	16.42	26.81	16.8
YDL119C	3.27	0.97	3.68	0.91	8.3	7.35	7.42	6.18	8.85	8.23	5.76	6.23	2.07	0.38	2.1	0.27	6.17	5.2	5	1.28	1.28	1.27	5.35	5.12	3.9	4.92	12.8	26.21	32	0.69	0.76	0.81	3.91	3.75	4.84	0.19	0.27	0.27	8.37	0.67	10.24	1.51
YDL120W	4.84	3.56	4.36	2.56	4.93	5.03	4.99	3.99	6.65	5.73	5.24	4.39	3.16	0.4	2.59	0.34	5.25	3.89	4.2	1.43	1.54	1.36	4.74	4.66	3.31	4.37	12.02	20.58	20.8	2.2	2.04	1.9	4.88	4.82	5.33	0.85	0.73	0.73	7.21	0.65	7.59	1.08
YDL121C	7.68	4.71	6.8	3.95	8.45	6.5	7.6	6.38	7.23	8.55	8.03	7.34	2.06	0.29	3.3	0.28	6.61	5.07	4.22	0.67	0.99	0.73	7.78	5.49	6.76	8.96	17.24	27.58	23.11	1.13	1.08	1.04	6.58	7.16	7.41	0.65	0.68	0.53	6.42	0.78	6.08	0.86
YDL122W	32.03	24.82	42.36	21.95	97.37	64.39	77.53	60.54	85.99	83.1	63.78	70.99	21.91	9.93	15.17	5.64	51.91	47.31	55.79	17.14	16.9	19.33	49.57	38.64	48.62	50.56	97.38	222.29	235.35	11.22	10.34	9.24	36.25	39.42	46.97	4.11	6.02	4.45	50.52	31.31	49.31	18.37
YDL123W	11.27	14.92	10.73	11.45	34.5	40.5	34.88	33.11	42.51	49.76	42.43	48.85	7.21	9.67	8.54	7.06	36.9	33.45	25.6	34.22	30.62	39	10.73	11.84	7.68	11.6	18.48	31.68	30.32	2.57	2.62	2.47	10.32	9.65	10.86	0.88	1.54	1.33	13.12	4.69	14.35	6.73
YDL124W	97.68	129.86	121.11	125.8	185.97	146.84	158.3	151.65	186.89	187.06	151.98	174.1	51.71	74.85	75.58	63.82	232.28	184	216.43	262.44	232.48	301.74	124.95	129.34	80.49	102.39	279.58	492.66	531.27	7.2	6.83	6.33	118.77	145.73	157.14	3.44	9.72	3.47	159.27	116.22	158.11	161.17
YDL125C	16.37	17.35	17.57	17.1	19.91	16.93	16.09	19.65	25.73	23.81	20.48	22.22	12.39	17.66	13.41	10.57	27.88	17.93	18.86	37.71	33.88	42.02	21.63	21.63	14.92	20.65	39.94	52.5	57.7	2.41	2.28	2.19	15.72	16.91	18.92	1.19	1.58	1.16	24.8	17.42	29.16	28.83
YDL126C	66.44	62.08	83.27	57.72	129.71	96.43	110.99	98.73	118.17	129.85	89.72	106.7	57.41	49.44	46.58	22.93	101.53	93.29	97.55	56.45	57.19	61.38	91.55	87.41	60.81	85.13	510.07	674.36	717.54	31.91	31.59	29.9	86.49	88.65	110.07	9.86	12.12	9.84	137.85	88.58	145.88	78.95
YDL127W	6.43	6.77	6.1	7.01	33.45	31.47	32.5	32.21	24.62	27.41	21.88	26.45	4.24	4.99	5.47	4.08	23.42	24.45	20.2	21.01	21.16	25.87	7.07	7.52	4.98	6.17	18.4	40.76	40.19	1.87	1.47	1.65	4.2	2.54	4.29	0.18	0.26	0.25	6.72	4.03	8.75	9.79
YDL128W	6.64	5.17	7.68	5.67	20.83	16.18	18.58	16.09	19.18	18.38	15.48	18.87	6.87	3.96	4.67	1.95	18.46	17.27	16.14	9.05	9.68	11.93	11.6	11.57	9.86	13.19	31.62	56.92	59.24	1.77	1.84	1.35	10.2	10.8	12.31	0.47	1.11	0.46	13.33	6.58	14.33	7.55
YDL129W	8.17	5.52	8.5	4.97	17.01	14.56	13.92	12.83	21.9	23.25	20.01	22.51	2.8	1.17	4.52	0.88	9.15	8.43	7.65	2.09	2.44	2.42	9.96	7.7	8.97	11.53	11.98	31.84	24.58	1.42	1.27	1.39	7.19	7.12	8.18	0.46	0.61	0.81	4.53	1.54	4.46	2.25
YDL130W	12.78	10.58	13.56	10.34	12.22	11.93	10.96	12.79	15.55	12.31	12.18	12.43	8.26	5.29	7.09	3.53	12.1	9.25	7.04	6.69	8.41	8.52	19.96	18.95	11.05	17.79	69.5	44.7	38.23	5.59	5.48	4.17	10.13	11.33	13.04	1.63	1.63	1.45	12.2	6.79	13.34	5.92
YDL130W-A	7.07	5.72	7.3	4.38	8.22	7.38	7.05	7.32	5.54	6.37	3.99	4.42	10.37	7.37	6.65	2.15	14.27	8.41	8.7	8.91	7.55	10.2	6.23	11.27	2.97	6.37	46.77	54.03	63.58	2.17	2.43	2.06	11.46	10.72	16.45	0.44	1	0.57	34.65	1.92	42.15	8.44
YDL131W	7.5	4.22	7.06	3.46	19.86	15.13	17.31	16.65	19.18	18.06	16.42	17.32	5.35	2.24	4.78	1.4	10.78	7.45	9.17	3.29	3.51	4.21	13.21	10.5	13.49	14.53	52.56	93.74	90.68	2.59	2.34	2.89	12.05	14.28	17.44	0.44	0.69	0.53	20.16	7.86	21.19	8.28
YDL132W	25.09	23.55	32.29	19.86	53.41	44.15	46.88	41.69	47.96	50.29	34.64	42.36	19.9	10.96	14.67	4.59	44.7	39.83	44.39	18.5	19.16	22.18	29.35	26.82	22.79	28.5	104.89	198.01	230.24	17.66	16.34	15.02	33.43	32.86	41.62	5.51	7.44	5.24	48.85	14.47	50.39	16.74
YDL133C-A	15.37	16	11.44	12.67	4.71	4.73	3.74	4.73	5.8	3.54	4.48	5.48	9.93	13.09	12.43	9.79	4.44	4.75	3.5	4.95	5.83	5.98	18.77	28.88	15.3	30.74	59.54	30.23	26.05	3.04	2.8	2.77	10.06	10.19	10.53	1.36	1.3	1.37	13.25	4.43	14.25	9.96
YDL133W	10.15	6.99	11.62	6.6	22.86	19.64	19.48	20.46	25.08	21.34	16.71	19.45	5.06	1.63	6.17	1.36	16.87	14.86	15.72	5.21	6.59	6.67	11.63	12.05	9.75	12.6	33.37	70.67	69.81	3.94	3.81	3.13	10.67	7.98	12.48	1.05	1.07	1.07	13.68	4.31	16.12	5.03
YDL134C	11.38	8.47	13.63	7.6	18.67	12.56	16.44	13.45	17.77	17.66	13.03	15.03	9.75	3.54	5.45	1.43	13.12	12.88	14.1	4.48	4.37	4.98	15.83	13.97	12.35	14.25	47.37	95.59	97.05	5.23	4.83	5	14.96	15.49	17.54	2.03	3.38	2.51	21.97	7.31	21.59	7.88
YDL135C	4.88	2.52	5.28	2.07	6.61	5.65	5.33	4.61	6.35	6.42	4.66	5.83	3.54	0.64	3.41	0.32	5.02	3.77	4.08	0.97	1.17	1.36	8.11	7.93	5.89	8.96	23.18	37.54	39.21	1.23	1.11	1.17	7.61	7.47	9.3	0.21	0.42	0.28	11.12	1.23	10.74	2.46
YDL136W	16.55	10.8	16.6	9.9	14.96	13.26	12.61	11.34	15.12	10.65	10.55	9.95	10.59	6.25	8.44	3.48	11	6.75	7.62	5.19	6.21	7.1	25.21	23.3	18.55	24.97	58.83	62.55	54.48	3.94	3.37	2.84	17.95	19.48	23.15	1.5	2.09	1.71	22.32	4.35	21.51	7.12
YDL137W	13.54	9.13	14.16	7.81	15.78	12.83	13.25	12.54	15.3	14.22	12.34	13.54	11.14	4.06	10.2	1.95	14.33	11.72	10.7	4.75	5.1	5.59	21.37	23.75	12.51	19.26	79.09	76.62	82.7	4.15	3.68	3.69	17.54	19.89	23.13	2.01	1.89	2.01	28.04	4.65	32.06	8.17
YDL138W	8.73	4.93	9.84	4.88	48.09	40.12	37.89	34.69	40.95	44.69	29.94	38.21	5.01	3.23	5	1.51	26.88	27.02	26.63	7.93	9.33	9.88	14.86	16.94	11.46	16.03	46.06	101.94	127.44	2.63	2.55	2.45	20.82	18.82	24.38	0.65	1.31	0.68	21.59	8.91	24.72	20.15
YDL139C	4.94	3.04	5.48	2.13	8.95	8.13	7.22	6.61	8.9	9.72	7.61	8.14	2.74	0.55	3.33	0.31	7.66	5.25	5.28	0.94	1.01	0.97	5.49	5.4	4.06	4.37	19.9	44.86	44.68	1.7	1.68	1.6	8.87	9.59	11.93	0.43	0.38	0.65	10.47	0.84	13.37	1.38
YDL140C	173.33	150.02	218.11	133.6	695.08	494.44	578.68	513.61	575.78	661.47	484.21	548.04	168.92	138.07	110.65	39.63	461.46	437.07	477.7	242.38	224.03	254.86	251.87	216.1	224.18	275.46	707.67	1295.9	1430.31	113.02	113.76	122.58	212.74	208.43	257.09	45.63	64.27	49.86	301.3	180.15	302.28	181.99
YDL141W	6.48	3.86	7.64	3.33	15.75	12.91	14.32	10.93	15.45	16.25	10.35	12.85	4.67	0.44	3.3	0.18	9.68	10.16	11.03	0.96	1.35	1.14	7.12	6.74	5.58	5.88	32.47	58.61	56.51	3.41	3.42	3.11	9.67	9.65	11.81	0.99	1.25	0.77	12.33	2.1	12.86	1.92
YDL142C	4.65	3.35	5.06	2.27	7.03	6.75	6.67	6.02	7.23	7.32	5.87	6.44	2.72	0.33	3.23	0.19	5.72	4.52	6.19	1.23	0.99	1.04	6.25	6.95	4.93	7.01	14	35.62	36.48	2.03	1.96	1.79	7.84	7.42	9.19	0.45	0.64	0.52	11.17	2.12	12.61	2.86
YDL143W	16.93	12.07	19.46	10.17	35.24	25.31	29.08	24.7	38.48	36.89	26.75	29.32	11.96	1.14	7.56	0.5	24.03	19.38	24.68	4.12	3.83	3.65	19.94	16.51	18.06	19.03	66.29	110.54	118.62	5.08	5.39	5.23	19.04	21.45	22.84	1.86	2.77	1.76	22.64	9	19.98	4.35
YDL144C	10.64	4.35	9.99	3.76	14.17	14.06	12.35	12.65	17.29	16.81	11.78	12.19	6.17	0.34	5.87	0.21	13.82	11.34	9.99	1.05	1.08	0.71	13.42	11.04	9.02	10.41	38.78	72.03	79.27	1.26	0.79	1	15.23	14.92	18.45	0.22	0.25	0.11	23.02	1.38	24.67	1.24
YDL145C	50.33	41.17	55.56	35.36	155.63	127.52	134.01	112.14	133.79	145.27	111.98	146.27	38.61	13.37	28.44	6	93.92	102.34	104.26	30.25	32.76	34.71	69.31	59.63	51.02	60.01	288.24	419.26	484.71	36.25	34.53	32.03	66.44	65.52	79.51	15.33	15.97	18.23	83.23	40.4	84.82	36.11
YDL146W	1.87	1.52	2.47	1.49	4.37	4	4.03	3.51	4.44	5.7	3.59	4.15	2.16	1.66	1.07	0.46	3.61	3.73	3.96	2.5	2.45	2.63	2.72	2.86	1.64	2.02	11.12	20.74	22.41	1.27	1.02	1.28	2.86	3.38	3.97	0.51	0.42	0.43	4.97	1.12	6.05	1.59
YDL147W	52.71	40.08	59.3	35.71	80.75	64.39	70.63	62.68	77.72	76.68	60.43	69.56	35.03	14.36	32.66	7.61	62.4	55.9	59.19	22.17	23.23	23.88	77.72	78.37	60.6	81.84	170.17	326.16	373.44	16.6	16.22	14.3	54.1	57.99	72.18	6.62	9.16	6.14	78.29	39.18	76.4	31.71
YDL148C	44.81	27.98	44.95	23.79	119.41	81.32	93.62	74.07	103.88	111.04	84.72	103.77	18.99	4.08	20.47	2.91	62.38	62.55	60.91	10.77	11.59	12.99	47.98	30.16	52.52	54.39	114.03	257.35	243.19	14.32	14.47	14.82	35.3	49.14	46.28	5.5	9.47	6.66	43.8	4.11	37.38	3.13
YDL149W	5.63	3.62	6.52	3.92	13.88	11.13	12.32	10.77	7.81	8.58	6.67	7.85	3.72	0.09	3.74	0.19	11	9.77	11.33	1.41	1.38	1.64	4.29	3	3.17	2.8	22.13	47.27	57.56	1.47	1.56	1.34	6.97	6.93	9.19	0.59	0.57	0.64	10.12	2.81	11.35	3.09
YDL150W	26.56	14.15	27.76	12.14	69.48	52.01	47.2	44.24	76.76	70.64	57.42	65.27	15.2	0.89	14.14	0.76	34.92	34.72	36.65	3.41	4.23	4.01	37.48	30.63	32	36.15	51.29	122.28	111.27	5.14	5.37	5.67	26.62	27.9	31.03	2.32	4	2.28	32.19	4.76	31.98	4.11
YDL153C	57.64	33.48	54.26	27.56	111.41	82.62	86.08	72.97	103.55	115.65	88.58	113.46	18.85	2.09	26.89	2.01	55	54.76	51.47	5.08	6.61	5.57	68.14	43.07	68.03	77.79	124.22	256.22	245.99	12.6	12.72	12.01	36.08	47.23	48.51	4.92	6.57	6.25	47.41	9.24	38.74	5.81
YDL154W	3.36	3.27	3.9	2.58	10.88	9.01	8.18	8.22	10.18	11.05	6.69	8.94	2.11	1.07	1.86	0.57	6.1	5.66	5.79	1.72	1.94	1.79	2.73	2.65	1.74	2.47	7.39	15.92	18.77	3.27	3.07	2.91	3.47	2.91	3.73	0.94	2.14	1.08	3.75	1.8	4.62	2.32
YDL155W	12.95	9.25	15.61	8.78	34.13	26.99	31.43	27.34	37.05	31.32	25.72	26.5	8.82	2.14	8.09	1.26	20.08	17.11	22.45	4.62	5.13	4.83	18.75	18.13	17.1	19	40.98	99.45	104.9	3.5	3.36	3.09	17.69	15.84	21.63	0.9	2.01	0.76	22.8	15.04	25.35	10.44
YDL156W	8.99	5.2	9.73	4.62	30.58	29.42	30.1	28.15	24.02	24.8	20.14	23.07	5.78	0.69	5.93	0.44	17.91	19.95	18.93	2.37	3.14	3.17	12.16	11.18	9.61	12.68	39.79	91.01	101.04	3.32	3.19	2.87	14.19	13.12	17.92	0.4	0.98	0.34	16.46	4.95	18.74	4.93
YDL157C	0.85	0.46	0.9	0.82	0.87	1	0.81	1.03	1.26	0.67	0.98	1.12	0.38	0.14	0.43	0.13	1.19	0.52	0.47	0.37	0.48	0.56	1.25	1.14	0.96	0.96	3.28	3.86	5.18	0.2	0.08	0.19	0.53	0.72	0.87	0.1	0.07	0.05	1.4	0.17	1.26	0.33
YDL159W	9.57	6.64	10	6.15	20.12	16.56	15.45	14.63	19.03	18.99	13.88	17.27	3.93	0.73	5.82	0.55	14.7	13.27	13.56	2.16	2.82	2.83	9.06	8.53	7.07	8.96	29.26	69.7	76.26	3.94	4.22	3.91	11.05	10.36	12.58	0.99	1.19	1.06	12.49	1.93	14.86	2.3
YDL160C	29.8	28.51	39.54	23.87	91.02	62.89	82.08	67.41	74.75	81.74	60.39	74.61	27.31	11.7	19.45	4.93	59.08	60.98	64.54	21.4	21.33	22.76	44.97	44.58	36.45	43.01	132.47	251.88	267.63	18.62	18.22	16.38	34.16	38.37	48.12	7.33	10.43	8.22	47.9	14.19	54.73	25.99
YDL160C-A	2.08	1.33	2.02	0.96	2.71	2.28	2.26	1.7	3.53	2.88	2.41	2.24	0.94	0.13	1.02	0.12	2.17	1.57	1.2	0.34	0.35	0.35	2.31	2.17	1.66	2.62	6.12	12.3	12.11	0.36	0.24	0.23	2.28	2.46	3.08	0.06	0.15	0.08	2.97	0.46	3.03	0.76
YDL161W	64.59	40.39	63.71	34.15	107.51	79.85	85.07	81.12	97.93	95.49	78.52	83.63	36.55	4.43	42.3	3.47	89.52	72.75	68.51	13.58	14.23	15.47	75.88	69.66	62.92	81.76	190.25	455.84	452.78	15.85	14.35	13.49	87.92	91.56	106.1	4.35	7.82	4.45	105.22	14.52	113.47	18.93
YDL164C	8.57	5.39	10.2	6.09	27.31	21.69	22.96	19.49	16.91	16.27	13.47	16.1	7.71	1.13	5.54	0.67	13.82	14.34	15.16	2.55	2.76	3.26	12.5	10.04	10.1	11.62	46.92	96.23	102.38	2.85	2.7	2.49	14.55	14.06	18.43	0.55	1.26	0.4	18.81	5	18.61	4.68
YDL165W	6.85	3.06	5.99	3.06	5.48	5.78	4.2	4.48	6.73	6.05	6.11	5.48	2.4	0.18	3.34	0.23	5.59	4.54	3.1	0.94	0.92	1.01	7.86	7.73	5.48	8.52	14.56	22.59	19.61	0.87	0.84	0.54	5.46	5.79	6.26	0.18	0.25	0.11	4.88	0.8	6.58	0.9
YDL166C	8.13	3.88	8.19	3.85	6.11	5.35	5.39	5.05	7.13	7.11	6.34	5.43	3.45	0.49	4.06	0.44	6	3.54	3.47	0.75	0.86	0.73	12.4	11.68	9.18	14.86	15.01	27.9	28.71	0.68	0.9	0.82	8.07	8.31	9.09	0.34	0.25	0.39	7.75	0.76	8.8	0.94
YDL167C	49.61	30.58	56.34	29.06	111.91	83.77	84.08	75.01	88.61	98.87	80.37	97.1	21.76	3.64	27.8	3.59	54.25	55.03	54.31	9.49	12.51	12.23	59.96	45.25	58.34	67.99	113.77	271.01	248.1	20.38	19.06	19.42	43.53	49.82	55.9	7.01	10.43	8.03	45.12	3.59	44.72	4.27
YDL168W	61.9	71.78	76.65	67.99	76.62	58.73	58.6	54.05	74.77	74.42	62.35	77.62	9.8	6.85	36.52	24.68	83.98	71.6	83.1	58.25	57.33	70.87	100.42	87.65	84.39	109.33	100.3	184.43	187.66	5.28	5.99	5.36	69.07	78.5	77.37	2.43	6.74	2.15	49.36	24.58	51.5	25.46
YDL170W	6.31	4.93	6.1	3.69	18.96	16.78	18.64	17.1	22.2	23.09	19.72	27.14	2.46	1.85	4.47	2.1	7.78	8.04	9.22	5.26	5.44	7.08	9.54	7.34	10.45	13.01	28.7	71.47	72.47	5.12	4.83	4.41	10.91	10.5	13.29	1.47	1.17	1.12	10.31	5.15	10.79	5.51
YDL171C	34.53	35.39	43.07	35.86	84.36	64.41	71.47	62.45	91.03	96.47	72.28	94.57	19.88	25.17	17.57	12.55	48.96	49.03	54.31	32.08	36.07	37.54	54.55	47.72	43.73	51.2	138.29	264.82	288.85	19.69	17.51	17.63	30.83	26.34	31.96	4.6	5.77	4.04	35.73	54.74	36.62	37.43
YDL173W	20.01	14.38	18.95	10.29	34.9	32.42	27.6	28.33	42.04	40.01	32.75	33.21	12.21	1.25	12.57	0.74	35.69	24.4	24.42	5.66	5.48	6.52	17.87	13.4	13.48	15.04	84.21	174.78	158.46	6.65	6.59	6.37	43.39	48.63	51.5	2.24	3.46	2.96	45.53	4.28	49.74	4.95
YDL174C	6.76	2.95	7.02	2.59	19.49	16.91	15.4	16.35	19.91	19.92	14.28	16.1	5.96	2.41	4.94	1.18	15.99	13	15.44	6.02	5.79	7.08	9.01	7.95	7.63	8.6	28.97	54.75	57.49	1.24	1.01	0.91	9.53	9.14	10.09	0.21	0.48	0.34	12.71	2.9	15.71	2.16
YDL175C	3.16	3.08	3.29	2.16	4.66	4.43	4.23	3.97	5.67	5.99	4.84	5.3	1.65	0.48	1.82	0.24	3.34	3.04	3.26	0.99	1.11	1.14	3.41	3.61	2.88	3.53	9.41	19.05	21.99	2.55	2.4	2.38	3.86	3.47	4.15	1.1	1.15	0.87	5.1	1.58	5.27	2.73
YDL176W	9.55	5.24	9.74	4.99	24.05	24.54	20.53	19.93	25.15	27.62	19.03	25.52	4.54	0.49	5.64	0.42	14.85	13.59	15.32	1.69	1.93	1.9	10.88	9.92	9.47	10.21	28.18	69.38	74.72	3.61	3.31	3.2	12.9	11.33	14.22	0.71	1.43	1.07	13.33	2.44	15.01	3.17
YDL177C	8.93	3.91	6.63	2.94	11.22	10.61	7.48	10.03	13.28	13.32	11.31	11.44	2.77	0.26	5.91	0.46	10.51	7.63	5.44	1.12	1.2	1.25	11.46	9.85	8.37	11.69	20.72	41.32	45.8	1.94	1.5	1.57	9.87	9.84	13.16	0.49	0.52	0.47	11.36	0.74	14.38	2.32
YDL178W	8.43	4.7	10	3.59	20.83	16.98	17.05	15.15	18.9	20.48	15.5	18.28	6.44	1.61	5.27	0.82	14.04	12.68	12.13	2.74	3.3	3.45	9.4	8.67	7.85	9.88	44.34	85.78	87.67	3.23	2.88	2.72	11.17	12.75	14.32	0.54	0.91	0.51	17.86	1.78	19.62	3.27
YDL179W	14.62	17.72	16.98	18.9	40.16	39.97	40.62	37.4	28.28	32.15	28.35	34.86	10.62	15.25	13.45	10.86	29.24	26.7	22.57	27.99	30.52	32.96	23.88	25.67	15.84	23.83	32.51	75.09	74.37	2.18	1.77	1.95	12.59	10	15.35	0.52	1.03	0.6	18.67	6.43	24.62	15.6
YDL180W	33.45	38.89	43.82	35.39	60.5	48.2	57.2	50.97	53.05	58.07	48.1	59.92	6.6	3.48	21.78	13.7	57.42	56.21	58.4	37.16	42.58	47.16	49.71	47.07	49.45	57.42	57.71	134.66	139.63	5.02	4.16	4.31	37.46	39.76	40.63	0.98	2.38	0.78	29.42	16.53	28.93	15.48
YDL181W	7.96	8.26	7.64	6.41	10.32	9.31	8.64	10.95	5.7	6.71	5.4	6.15	11.42	10.27	5.54	3.03	16.25	9.79	9.67	11.93	10.73	12.97	9.99	15.59	5.89	12.42	12.54	11.82	13.3	0.57	0.62	0.53	1.67	1.65	2.81	0.03	0.11	0.02	6.04	3.68	9.38	8.39
YDL182W	42.92	60.32	40.43	45.35	60.55	49.48	60.48	61.62	55.75	49.89	60.92	67.21	6.44	8.08	38.88	34.74	79.12	65.14	79.89	88.83	85.47	103.77	34.01	27.67	47.62	53.43	76.26	148.09	160.85	4.8	4.54	4.63	67.07	82.84	70.6	2.74	5.71	3.06	57.26	27.98	51.43	26.27
YDL183C	2.21	2.65	2.33	1.13	6.19	6.1	6.47	5.58	6.3	6.05	5.62	6.31	0.71	0.49	1.58	1.63	5.15	4.68	5.18	3.65	4.11	5	2.67	2.74	3.35	3.93	8.25	19.13	17.58	1.11	0.91	1.09	3.64	3.84	4.98	0.29	0.31	0.34	4.43	2.73	4.49	2.11
YDL184C	14.36	12.9	10.4	10.32	3.53	3.55	3.25	3.99	4.44	3.94	4.95	4.87	7.26	8.52	7.51	6.85	4.79	3.68	2.39	4.3	4.79	5.67	15.95	29.17	9.02	18.67	91.19	26.69	23.18	2.5	2.48	1.6	6.36	6.38	5.59	0.97	0.43	0.76	8.77	4.72	9.46	9.03
YDL185W	26.13	21.17	32.63	20.02	74.06	56.56	64.22	53.54	63.86	68.35	44.75	59.02	26.62	14.23	13.8	4.03	45.73	46.67	57.03	18.08	19.23	21.62	41.28	37.06	31.41	34.97	287	298.27	319.59	30.01	31.84	30.05	49.19	52.12	58.12	13.15	12.85	14.96	59.05	28.67	63.28	24.7
YDL188C	15.01	12.48	15.75	10.59	19.88	17.96	18.67	16.19	20.59	21.2	17.6	18.41	11.06	2.82	9.96	1.52	18.12	16.43	15.74	5.08	4.87	5.76	17.34	19.84	10.24	15.4	51.32	90.85	93.48	4.64	4.99	4.31	15.5	16.87	18.65	1.99	2.22	1.84	22.02	8.92	25.2	11.49
YDL189W	14.81	10.13	17.62	8.05	39.45	31.77	31.63	27.76	45.34	42.8	33.13	35.28	10.93	1.09	9.01	0.6	26.84	22.18	22.5	4.43	4.92	4.36	18.09	15.25	15.76	16.09	50.24	104.76	105.53	6.83	6.2	5.51	20.48	23.04	27.52	2.33	3.14	2.62	28.69	4.18	28.7	4.03
YDL190C	26.77	21.61	28.78	19.48	72.4	60.81	62.48	54.64	55.14	66.54	48.59	57.24	16.89	5.29	16.37	2.9	52.25	52.26	54.97	14.47	15.31	16.4	31.35	26.73	26.3	29.45	90.74	169.23	221	15.58	13.87	12.74	28.26	28.94	37.02	4.12	7.53	4.5	39	12.55	38.19	12.28
YDL191W	30.35	24.85	26.68	20.6	16.49	14.83	14.24	15.04	17.36	15.34	14.23	15.14	18.56	13.98	17.83	7.93	16.59	13.63	11.61	11.8	13.28	14	40.99	47.87	30.06	47.23	129.34	69.38	74.3	5.92	5.44	5.94	26.19	25.55	28.48	2.99	2.87	2.67	31.14	5.43	32.64	16.01
YDL192W	10.07	7.1	9.58	5.98	13.91	12.11	12.55	10.52	18.42	12.71	12.2	13.65	8.02	3.11	5.36	1.64	10.1	7.27	8.92	4.37	4.42	4.96	17.93	17.95	13.83	18.18	58.01	57.72	63.3	3.08	3.2	2.93	15.11	17.41	17.05	1.6	1.98	1.84	21	5.69	19.67	7.81
YDL193W	3.83	2.2	4.17	2.19	6.29	5.23	5.1	3.93	5.34	5.89	4.82	5.22	3.54	0.46	2.6	0.16	5.25	3.48	5.02	0.86	0.85	1.1	4.77	4.23	2.88	3.51	15.38	28.22	29.69	1.04	0.9	0.72	4.67	5.21	6.38	0.18	0.41	0.24	7.15	0.71	8.6	1
YDL194W	4.62	3.02	5.52	2.31	16.59	13.63	13.48	11.5	16.03	17.42	12.25	15.62	2.16	0.11	1.86	0.08	9.4	9.11	10.04	0.45	0.32	0.41	3.29	2.29	2.49	2.78	23.14	52.18	51.19	0.86	0.88	0.64	5.42	5.21	6.5	0.05	0.27	0.15	7.91	1.1	9.74	1.54
YDL195W	110.49	102.58	134.07	82.55	461.94	361.76	389.88	343.55	358.09	456.75	321.86	387.13	96.14	49.53	68.04	15.04	324.84	336.69	314.03	111.38	100.5	119.32	160.9	147.35	120.09	138.77	508.87	931.38	1077.11	75.45	77.43	81.65	165.24	162.97	195.7	33.81	50.33	35.72	195.35	72.05	220.54	116.56
YDL197C	8.8	5.58	9.96	4.35	30.21	28.22	26.99	24.15	28.63	29.75	22.62	23.26	7.85	1.17	5.79	0.74	19.97	18.88	18.46	3.88	3.7	3.04	13.85	13.56	9.48	12.45	34.9	79.91	89.77	1.36	1.6	1.67	15.4	14.01	18.98	0.33	1.17	0.6	20.81	6.47	23.94	12.41
YDL198C	9.75	10.05	8.37	8.85	20.54	16.58	19.95	19.84	22.48	26.24	27.55	28.34	6.31	7.07	8.57	6.78	9.46	7.5	6.99	11.37	11.83	14.76	14.49	13.03	15.92	23.55	27.88	47.75	50.84	1.68	1.44	1.37	7.07	8.17	8.65	0.4	0.47	0.31	8.69	6.95	8.25	6.89
YDL199C	1.77	1.29	1.82	0.82	6.64	5.8	5.6	5.33	4.64	4.58	3.08	3.57	1.58	0.53	1.48	0.43	6.1	6.27	5.42	0.68	1.08	1.19	0.72	0.66	0.67	0.57	10.94	20.42	24.16	1.14	1.24	1.05	2.99	3	4.84	0.31	0.28	0.34	4.83	0.63	6.56	1.13
YDL200C	2.94	1.23	3.05	1.07	4.06	3.43	2.84	3.21	4.21	3.68	3.59	3.03	1.3	0.12	1.69	0.09	3.83	2.36	2.39	0.24	0.17	0.28	2.39	2.72	2.75	3.47	8.85	16.64	16.25	0.28	0.27	0.17	3.35	4.07	4.05	0.09	0.05	0.08	5.21	0.45	5.73	0.51
YDL201W	11.36	5.39	11.11	4.75	19.52	15.81	14.82	12.49	23.77	22.43	14.3	17.64	5.85	0.72	4.79	0.48	11.4	9.04	10.28	1.61	2.07	1.86	13.82	9.08	13.33	12.98	31.43	61.58	67.99	2.5	2.41	2.5	11.93	14.22	13.89	0.93	1.64	0.78	13.66	1.36	13.06	1.43
YDL202W	5.63	4.19	5.76	2.88	7.77	8.18	6.99	7.09	10.99	9.4	8.25	7.1	3	0.28	2.98	0.12	7.72	6.07	5.16	1.09	1.21	0.88	5	4.14	4.01	3.9	19.48	42.61	42.71	1.26	1.55	1.32	7.6	8.77	9.5	0.34	0.49	0.45	9.04	2.25	9.94	2.03
YDL203C	10.89	7.74	13.21	6.55	37.95	29.84	29.54	26.29	36.62	37.1	27.97	32.49	6.23	0.39	6.15	0.24	21.86	21.09	19.78	1.87	2.58	2.35	10.2	7.63	9.46	9.51	45.2	115.45	124.15	5.16	5.2	4.93	17.3	17.31	20.27	1.31	2.09	1.34	19.35	2.19	22.83	3.13
YDL204W	5.97	9.35	6.87	8.37	20.02	20.06	19.92	19.1	15.4	19.74	12.38	14.69	21.59	50.04	8.73	11.37	53.06	40.24	49.13	88.86	70.9	96.56	6.22	7.63	6.36	7.7	17.62	32.16	43.55	2.7	2.97	2.62	5.3	5.54	7.47	0.68	1.64	0.96	13.22	6.67	16.67	17.36
YDL205C	54.36	62.62	54.95	54.45	88.57	73.49	73.53	70.12	82.89	87.42	69.71	91.69	18.07	16	37.21	30.37	74.18	67.48	69.92	57.41	65.26	71.88	67.85	62.64	60.57	80.66	71.55	155.57	169.81	11.31	11.15	9.2	31.55	32.81	39.11	3.96	5.63	4.14	35.97	26.31	38.49	23.34
YDL206W	2.11	1.14	3.02	1.05	8.35	7.4	7.94	5.74	6.22	6.87	4.35	5.8	2.62	0.23	1.42	0.12	5.64	5.5	5.96	0.58	0.9	0.67	1.62	1.88	1.21	1.73	14.67	30.71	33.75	1.33	1.02	0.92	3.21	2.95	3.67	0.35	0.49	0.36	5.29	0.69	5.73	0.81
YDL207W	18.79	15.47	21.59	12.92	47.3	35.87	38.53	34.3	44.86	45.68	34.73	38.21	9.05	1.05	11.21	0.93	32.45	28.79	30.5	4.51	5.52	5.82	17.59	12.8	15.63	18.22	64.5	156.21	159.44	4.99	4.59	4.43	25.97	24.73	32.14	1.69	3.68	1.66	30.14	8.89	30.59	8.25
YDL208W	15.01	9.36	14.06	8.41	15.07	14.51	12.96	13.39	24.29	20.03	17.38	19.16	7.82	2.13	7.3	1.49	13.23	9.7	8.92	3.7	4	4.12	23.68	22.7	17.65	25.98	35.05	49.28	50.84	2.05	2.02	1.66	13.95	17.66	17.13	1.32	1.29	1.14	16.14	2.66	15.33	2.92
YDL209C	10.99	7.29	9.76	6.32	20.91	17.29	15.28	16	22.2	20.67	15.75	17.83	3.2	0.28	6.28	0.41	13.7	11.34	12.65	1.48	1.99	1.42	9.8	7.66	10.49	10.9	23.44	59.65	71	2.7	2.93	2.28	8.11	8.12	11.28	0.68	1.05	0.84	12.98	1	13.97	1.13
YDL211C	8.11	4.85	6.02	3.58	24.41	24.46	21.31	22.18	21.82	23.81	18.74	22.17	3.34	0.44	5.59	0.35	12.78	13.11	10.32	1.59	2.21	1.88	7.84	7.84	6.12	8.33	20.9	63.99	62.04	2.58	1.89	2.41	6.36	5.05	9.44	0.46	0.71	0.58	7.83	0.74	10.34	3.05
YDL212W	4.9	3.02	4.47	2.93	4.06	4	3.33	3.54	5.75	5.75	4.75	4.63	2.86	1.3	3.02	0.57	3.87	2.82	2.18	1.18	0.93	1.06	5.77	5.76	5.1	6.43	18.51	25.16	27.31	1.01	1.13	1.01	4.62	5	5.49	0.31	0.36	0.27	5.99	1.06	6.61	1.25
YDL213C	19.83	11.86	20.39	10.16	29.79	26.27	22.38	22.89	45.51	41.84	33.8	31.93	8.43	0.75	8.62	0.78	19.42	13.95	14.1	1.75	1.9	1.7	21.11	12.19	19.46	21.74	62.22	114.8	116.24	3.79	3.84	3.99	28.03	34.13	33.46	0.97	1.61	1	31.14	2.81	28.58	3.35
YDL214C	0.42	0.46	0.54	0.45	1.32	0.95	1.3	1.03	1.03	0.99	0.51	0.75	0.42	0.52	0.29	0.18	1.66	1.23	1.57	1.83	1.11	2.18	0.37	0.53	0.26	0.49	2.65	2.57	4.2	1.8	1.56	1.59	0.53	0.23	0.43	0.38	0.56	0.34	1.05	3.4	1.74	4.19
YDL215C	5.27	4.9	5.91	3.7	13.99	10.41	12	10.86	11.19	13.4	9.39	12.37	3.8	1.34	3.3	0.56	8.1	8.57	9.81	2.21	3.13	3.58	6.19	5.33	5.25	6	20.94	46.95	46.99	3.47	3.86	3.17	6.19	5.19	6.91	1.3	1.45	1.43	7.39	3.25	9.91	3.79
YDL216C	6.88	4.23	8.19	3.22	12.12	11.13	12	9.44	11.77	13.13	8.34	9.39	3.93	0.38	4.75	0.22	8.42	7.27	7.84	0.71	0.93	0.97	7.41	7.07	5.61	7.45	30.57	69.06	78.08	2.38	2.27	2.19	9.6	8.93	12.52	0.47	0.83	0.74	14.65	2.12	19.65	3.25
YDL217C	8.37	5.43	7.65	4.45	13.33	12.21	10.67	10.4	16.2	15.29	12.07	12.61	3.31	0.64	4.66	0.53	9.32	8.54	8.23	2.03	1.89	2.35	6.49	5.3	7.05	6.67	24.22	53.14	53.08	2.85	2.8	2.68	10.33	11.47	13.91	1.08	1.33	1.18	13.47	2.31	14.63	2.51
YDL218W	0.65	0.55	0.65	0.36	2.87	3.05	2.49	2.07	2.14	2.64	2.21	2.69	0.19	0.04	1.08	0.52	4.32	3.64	3.68	2.06	1.46	2.68	0.34	0.34	0.78	0.55	1.42	3.06	4.97	0.04	0.11	0.08	0.75	0.61	0.63	0.02	0.05	0.03	0.13	0.15	0.38	0.14
YDL219W	2.08	0.88	2.21	0.86	2.24	2.03	1.74	2.11	2.32	2.42	2.14	1.6	1.07	0.08	0.99	0.03	2.45	1.57	1.36	0.19	0.13	0.26	2.04	1.49	1.56	1.72	9	13.1	11.9	0.19	0.23	0.26	3.08	3.3	3.65	0.05	0.14	0.02	4.34	0.07	3.3	0.16
YDL220C	6.65	3.27	7.96	2.99	34.29	27.04	26.94	23.51	27.02	25.7	18.81	21.58	4.15	0.53	2.93	0.21	17.74	16.9	16.8	1.1	1.35	1.45	7.29	5.07	6.04	6.01	33	74.61	84.17	6.25	6.7	7.23	11.57	11.42	14.22	2.83	2.71	2.99	15.22	1.08	15.66	1.62
YDL222C	0.66	0.53	0.65	0.48	3.92	5.23	3.16	4.04	2.6	3.73	2.36	3.67	4.23	8.88	1.44	1.49	14.23	10.38	11.38	34.63	24.64	37.43	0.5	0.25	0.29	0.36	4.07	6.67	7.77	1.52	1.63	1.75	1.44	1.79	2.45	0.93	0.68	1.08	4.21	5.34	4.89	9.03
YDL223C	2.5	1.51	2.89	1.33	26.84	23.46	19.77	19.95	19.13	21.41	13.56	16.15	8.97	27.22	3.12	3.65	38.92	30.02	41.22	89.54	69.43	104.35	1.67	1.03	1.18	1.15	25.76	55.39	62.04	8	8.19	9.36	5.83	5.19	6.95	3.02	2.97	3.68	12.31	6.64	12.11	8.01
YDL224C	35.65	33.3	40.66	28.65	158.97	135.75	141.72	127.61	128.88	151.61	112.99	133.04	23.12	15.7	24.11	7.81	101.25	110.63	107.88	44.56	45.13	48.28	44.28	44.22	36.81	43.06	143.48	360.17	394.87	18.85	17.79	18.8	46.84	43.97	59.34	7.21	12.51	7.8	58.32	17.61	73.27	34.35
YDL225W	26.36	19.2	30.82	16.82	50.91	41.8	40.76	37.06	52.12	47.54	38.15	42.23	18.32	3.18	14	1.4	32.9	29.58	34	6.43	7.13	7.4	30.8	26.25	27.81	31.19	120.04	265.06	294.94	14.79	13.49	13.47	38.82	43.74	50.67	4.13	5.36	4.52	57.51	8.74	55.59	14.99
YDL226C	28.02	18.14	26.72	16.83	28.31	25.31	23.43	21.67	32.11	29.62	24.85	25.15	13.87	1.86	15.65	1.21	24.41	19.45	16.54	4.4	5.04	5.76	23.63	17.12	15.27	16.1	66.89	112.71	116.24	7.02	6.36	6.39	24.87	28.25	31.78	2.37	2.81	2.63	31.63	5.8	37.18	7.11
YDL227C	18.66	24.47	23.06	26.11	64.76	56.23	64.97	58	47.88	45.57	42.79	46.22	27.28	33.49	15.93	12.5	33.58	26.99	27.17	25.43	31.6	31.99	28.66	31.34	20.39	32.56	69.76	164.89	167.29	5.22	5.71	5.96	26.84	19.75	32.79	2.12	2.22	2.23	43.37	16.62	50.75	21.04
YDL229W	30.18	26.14	32.1	26.63	92	72.92	84.92	68.14	84.17	86.27	61.73	82.7	25.08	17.68	15.67	8.05	50.66	54.26	53.77	26.51	30.99	34.39	43.35	36.62	36.22	46.56	206.79	219.8	226.39	15.64	14.34	14.56	36.88	40.77	41.44	6.11	4.85	6	42.88	22.31	47.95	15.36
YDL230W	5.66	4.3	6.3	3.04	10.22	8.5	7.25	7.03	11.27	10.07	8.23	7.37	4.11	0.3	3.36	0.14	9.23	6.66	6.4	0.71	0.72	0.93	5.46	4.78	3.7	3.84	24.08	48.24	61.06	1.09	1.26	1.09	9.04	9.1	12.31	0.14	0.18	0.22	11.98	1.06	12.41	2.01
YDL231C	13.74	10.22	14.86	9.44	53.41	40.02	45.29	37.98	46.65	50.5	33.82	45.71	6.31	1.48	7.89	0.89	26.41	28.38	32.71	4.43	5.9	6.04	13.09	10.26	13.46	13.23	46.92	110.3	122.68	5.53	4.78	4.66	16.69	13.66	18.65	1.55	2.73	1.62	19.43	11.12	18.94	10.36
YDL232W	5.92	4.27	4.2	3.16	4.95	4.9	3.83	4.27	4.99	4.71	4.46	4.9	2.76	0.87	3.61	0.82	5.25	3.84	2.58	1.62	1.72	1.7	6.35	9.38	3.56	7.62	13.47	13.91	13.02	0.75	0.74	0.74	5.17	5.52	5	0.45	0.5	0.57	6.85	0.07	7.84	2
YDL233W	7.5	3.93	7.08	3.3	16.96	14.88	12.67	12.6	15.1	15.69	13.27	14.08	3.49	0.22	4.42	0.18	12.08	11.34	9.31	1.17	1	1.45	7.47	7.11	5.17	7.46	22.77	51.21	59.1	1.21	1.29	1.43	7.85	7.96	9.46	0.19	0.36	0.18	11.17	0.89	11.78	1.67
YDL234C	10.03	5.67	11.44	5.37	35.82	30.42	28.41	25.67	30.14	34.73	24.78	27.54	7.91	2.08	6.57	0.59	26.27	24.04	27.64	5.99	5.28	7.18	12.16	10.74	9.76	10.94	51.96	131.77	136.62	4.35	4.3	3.81	15.28	16.84	21.47	0.62	1	0.59	24.94	3.12	26.1	4.55
YDL235C	10.15	8.51	10	6.11	14.38	13.73	11.86	12.63	18.65	16.86	14.32	12.61	5.72	1.86	6.1	1.15	12.08	10.34	8.16	3.7	3.8	3.75	15.12	13.88	11.79	16.91	35.87	66.89	67.43	2.72	2.43	2.49	12.14	15.91	17.42	1.18	0.92	0.98	15.73	2.53	17.35	2.81
YDL236W	5.69	3.25	6.42	3.73	10.69	8.83	7.51	7.97	10.23	11.35	7.87	9.98	4.18	1.53	2.97	0.43	7.87	7.04	6.03	2.26	2.82	2.93	7.2	6.79	5.07	5.94	26.61	43.74	48.88	1.82	1.5	1.28	8.18	9.82	11.2	0.33	0.61	0.37	9.88	1.45	11.02	1.92
YDL237W	3.6	1.39	3.5	1.33	6.85	5.18	4.81	4.27	6.25	6.69	4.19	4.87	2.98	0.18	1.77	0.08	5.27	4.45	5.84	0.47	0.48	0.52	3.87	3.47	2.94	3.09	17.58	32.56	34.1	0.72	0.76	0.66	5.25	5.72	6.4	0.18	0.26	0.2	7.77	1.08	7.89	1.02
YDL238C	1.91	1.56	2.23	1.71	6.66	5.9	6.49	5.44	6.07	5.86	4.13	5.75	2.54	1.7	1.7	0.44	5.55	4.98	6.17	2.47	3.03	3.24	2.39	2.77	1.48	1.66	13.51	27.09	33.47	0.97	0.76	0.77	3.72	3.03	4.07	0.16	0.29	0.09	6.29	1.36	7.24	1.43
YDL239C	2.21	1.55	2.59	1.46	6.32	5.28	6.58	5.12	5.67	5.14	3.66	4.92	2.57	1.49	1.09	0.57	4.7	3.57	5.68	2.04	2	2.22	1.96	1.48	1.38	1.76	10.38	23.31	23.25	1.35	1.45	1.42	3.04	3.12	4.76	0.23	0.38	0.27	5.64	1.75	6.25	2.03
YDL240W	14.38	9.98	17.46	9.06	48.04	36	44.19	35.13	41.99	47.86	33.86	41.78	9.02	0.92	9.13	0.87	26.03	27.97	31.34	3.72	4.2	5.03	20.61	17.77	17.02	22.75	69.69	177.83	178.98	6.23	4.94	5.04	16.15	15.87	22.58	1.41	2.65	1.42	23.99	7.21	29.23	9.11
YDL241W	0.45	0.28	0.57	0.3	0.4	0.58	0.32	0.39	1.34	0.75	0.85	0.8	0.14	0.08	0.05	0.02	0.32	0.36	0.16	0.06	0.1	0.15	0.43	0.28	0.25	0.39	1.49	2.81	3.15	0.14	0.08	0.08	0.87	0.95	0.89	0.01	0.01	0.04	0.65	0.06	0.78	0.05
YDL243C	23.99	27.23	31.58	25.36	56.52	37.47	42.74	37.15	43.93	48.93	41.56	48.88	1.03	0.64	11.63	9.55	41.47	39.9	44.88	29.03	28.9	34.65	63.82	56.47	73.72	87.82	52.97	108.69	122.54	2.36	2.4	2.17	34.18	43.11	45.61	1.86	7.1	1.96	27.74	7.75	23.76	3.9
YDR001C	23.44	32	30.48	29.06	68.08	54.36	59	54.48	50.53	60.92	38.57	51.89	31.43	50.73	21.85	18.64	66.44	62.98	67.71	74.4	68.51	79.93	32.99	38.37	15.99	22.13	107.09	192.23	235.42	5.37	5.2	4.44	25.17	27.78	34.51	1.36	2.19	1.54	50.68	62.96	56.98	79.5
YDR002W	15.4	11.58	14.47	10.46	19.09	18.56	18.93	17.08	22.03	21.52	18.72	20.25	6.78	4.69	9.55	3.73	19.88	15.38	14.15	10.84	10.87	12.21	23.25	23.91	17.09	24.2	50.61	61.5	55.74	3.31	3.44	2.58	13.04	16.63	17.44	1.13	1.36	1.29	16.41	9.26	17.71	10.98
YDR003W	16.62	16.39	16	13.34	17.75	17.89	15.77	15.02	20.29	20.22	16.26	19.32	4.22	2.2	11.93	7.14	23.88	21.59	18.39	18.06	17	20.71	25.93	28.07	17.64	25.77	27.36	55.47	60.08	0.5	0.6	0.54	17.25	18.69	20.86	0.23	0.63	0.4	18.13	8.26	21.69	14.56
YDR003W-A	0.88	1.25	1.51	1	1.03	0.9	1.48	0.69	1.36	0.85	0.83	1.01	0.71	0.18	0.47	0.39	1.32	0.73	1.36	0.75	0.77	0.63	2.12	1.71	1.77	2.14	4.82	9.57	10.01	0.05	0.06	0.09	1.48	1.32	1.44	0.01	0.08	0.01	1.35	2.08	1.72	1.33
YDR004W	9.68	6.79	9.23	4.93	17.12	16.63	16.38	14.97	17.09	17.79	12.51	16.74	4.1	0.58	4.9	0.64	10.53	10.68	11.4	1.91	1.73	1.68	11.17	11.87	9.31	14.04	25.27	58.69	50.7	1.52	1.54	1.47	10.71	9.24	11.79	0.52	0.65	0.43	10.07	4.33	13.24	6.04
YDR005C	6.66	6.53	8.49	6.23	15.33	13.51	14.47	13.68	14.06	15.13	12.58	13.54	4.4	4.36	5.1	2.52	11.42	10.61	10.65	6.46	7.28	7.83	9.25	11.55	7.22	10.26	27.88	61.82	63.93	2.22	2.19	1.95	8.01	7.63	9.98	0.59	0.57	0.48	10.74	6.02	11.4	9.98
YDR006C	58.77	52.65	67.15	44.28	325.22	289.92	284.37	259.17	248.51	301.99	237.2	299.4	28.02	20.32	39.22	14.5	192.64	204.86	174.06	100.65	102.25	122.86	89.99	82.86	79.3	93.9	183.46	442.82	481.28	25.17	23.05	23.48	76.13	67.03	91.1	8.04	11.01	8.2	80.07	20.34	91.5	44.88
YDR011W	349.7	422.1	420.68	377.41	716.52	504.7	680.77	565.08	473.26	513.16	495.16	614.32	66.15	71.61	196.94	140.99	767.74	777.49	848.51	545.42	598.72	650.51	436.46	388.44	370.85	466.27	535.52	1146.12	1191.95	12.97	13.66	13.24	389.79	394.42	451.59	11.42	26.5	10.84	298.33	402.05	295.07	284.35
YDR012W	9.09	5.94	9.89	5.09	35.69	29.17	27.72	25.9	33.59	34.97	27.17	28.1	6.79	2.39	6.51	1.48	24.82	21.04	21.21	8.58	8.76	9.71	13.16	13.86	13.78	14.01	37.85	56.2	51.19	3.11	3.2	3.06	15.52	15.84	17.32	1.79	2.77	1.97	16.76	4.18	15.33	4.25
YDR013W	1.18	0.71	1.31	0.64	1.79	1.53	1.62	1.38	1.44	1.78	0.89	1.86	0.72	0.14	0.56	0.06	1.08	1.02	0.82	0.36	0.28	0.26	1.43	1.32	0.85	1.26	2.95	5.95	6.51	0.28	0.37	0.19	1.22	0.98	1.28	0.08	0.07	0.07	1.24	0.28	1.49	0.36
YDR014W	4.54	1.82	5.59	1.89	17.15	13.71	13.8	11.02	10.89	11.85	8.92	10.94	2.26	0.19	2.56	0.1	7.91	7.86	7.95	0.47	0.69	0.54	6.59	5.9	6.31	8.04	17.66	45.66	49.79	1.3	1.08	0.77	6.25	6.54	8.42	0.19	0.46	0.21	9.26	0.46	10.49	0.78
YDR016C	2.21	1.43	1.69	1.11	0.97	1.05	0.87	0.83	1.79	1.41	1.09	1.52	1.42	0.1	0.92	0.04	1.32	0.8	0.87	0.16	0.15	0.19	1.83	1.37	1.37	2.05	8.47	15.52	11.2	0.35	0.45	0.18	3.08	3.16	3.44	0.11	0.13	0.18	4.72	0.48	5.9	0.79
YDR017C	22.23	15.81	24.11	14.13	72.32	62.21	71.3	58.34	65.47	71.17	54.12	65.35	14.77	6.74	14.87	3.73	39.35	43.49	48.21	11.76	14.09	15.66	34.09	31.48	28.98	35.82	77.94	178	200.27	5.96	5.83	5.63	26.41	25.78	31.8	2.01	3.26	2.4	35.92	15.58	35.54	17.25
YDR018C	0.19	0.13	0.19	0.05	0.47	0.63	0.67	0.48	0.45	0.56	0.29	0.32	0.19	0.14	0.11	0.05	0.49	0.3	0.45	0.11	0.18	0.17	0.14	0.11	0.09	0.22	1.94	4.74	5.39	0.19	0.09	0.16	0.22	0.19	0.34	0.01	0.02	0.01	1.13	1.45	1.92	0.92
YDR019C	3.25	2.61	3.67	2.58	11.3	11.56	8.99	10.52	10.18	10.92	7.92	8.22	5.1	4.08	2.51	1.19	9.76	8.59	7.51	4.97	5.27	5.37	5.58	5.19	4.23	6.89	36.36	66.41	72.47	0.99	1.34	1.27	4.66	5.12	7.78	0.2	0.3	0.26	25.18	16.42	26.18	13.8
YDR020C	6.19	2.46	6.26	2.62	14.7	11.03	11.89	10.47	16.81	15.93	13.54	15.81	2.31	0.18	3.1	0.14	8.23	6.2	6.1	0.63	0.77	0.52	7.79	5.97	6.72	8.15	14.93	34.57	34.94	1.28	1.19	1.33	6.17	6.28	7.45	0.18	0.36	0.25	5.24	0.17	6.81	0.4
YDR021W	10.18	4.87	8.85	3.52	20.83	18.14	17.37	13.43	23.59	22.8	20.46	23.81	2.46	0.23	4.26	0.33	9.85	9.68	8.07	0.49	0.92	0.8	9.19	5.14	9.21	9.36	20.38	49.04	45.66	1.95	1.88	1.98	6.99	8.65	8.3	0.3	0.37	0.27	7.83	0.39	6.71	0.36
YDR022C	1.05	0.71	0.93	0.34	1.71	1.75	1.28	1.74	1.76	1.84	1.32	0.9	0.78	0.59	0.8	0.35	1.62	0.89	1.01	1.04	1.2	1.64	1.12	1.35	0.72	1.3	5.79	10.77	10.01	2.27	2.23	2.77	1.6	1.14	1.6	0.42	0.04	0.31	2.51	0.54	4.29	1.16
YDR023W	25.49	16.74	26.69	16.33	51.23	47.38	47.38	44.2	49.55	50.34	41.49	48.83	15.35	4.77	13.51	2.85	37.62	35.67	30.52	9.74	12.07	12.12	39.09	32.92	28.68	39.83	104.14	137.56	143.76	6.39	6.5	7.06	21.45	24.36	27.32	3.45	3.13	3.57	25.69	7.25	26.33	6.89
YDR025W	34.13	27.85	32.7	25.66	39.74	37.05	31.98	33.89	35.74	31.48	34.8	37.94	24.26	15.88	18.27	9.1	34.37	27.83	23.41	20.98	22.68	24.74	50.76	49.27	34.83	43.95	126.13	124.45	128.77	10.86	10.97	10.8	35.9	39.3	45.18	3.94	5.42	3.9	50.73	10.8	49.91	19.31
YDR026C	17.85	11.07	19.05	9.57	40.3	29.72	31.46	26.73	43.04	38.41	30.85	33.71	11.65	0.98	11.48	0.67	25.56	22.11	27.1	3.36	3.47	3.32	23.1	16.6	18.08	22.56	43.45	113.68	146.49	6.94	6.36	7.81	26.23	26.97	31.03	2.59	3.58	3.04	28.39	5.35	30.95	6.12
YDR027C	32	25.14	35.61	22.16	56.28	44.75	48.01	45.53	51.16	53.56	37.39	43.74	20.51	6.59	19.65	3.26	38.01	37.6	43.69	10.11	11.68	12.06	35.12	35.9	28.66	37.51	128.18	305.82	333.38	16.97	16.33	15.18	45.35	46.82	60.17	7.23	9.97	7.81	59.07	17.27	65.7	23.78
YDR028C	38	29.33	48.03	26.3	96.16	77.9	85.99	76.71	86.54	92.82	72.79	82.94	30.04	12.15	20.21	4.98	67.03	65.67	71.49	22.2	24.19	26.71	53.26	46.2	42.08	49.37	175.29	371.91	401.31	18.03	16.91	16.79	48.86	52.44	61.37	4.98	7.81	5.73	63.42	17.9	67.29	22.61
YDR030C	3.72	1.66	4.13	1.44	10.27	8.48	8.21	7.71	8.72	7.7	6.98	8.38	2.19	0.08	2.53	0.09	7.46	6.11	6.29	0.55	0.52	0.91	3.33	2.44	3.2	3.14	11.35	26.61	25.91	0.68	0.64	0.77	4.37	5.93	6.99	0.15	0.34	0.35	5.94	0.76	6.28	0.75
YDR031W	0.92	0.4	1.12	0.7	0.68	0.53	0.58	0.73	0.83	0.48	0.6	0.53	0.94	0.05	0.73	0.05	0.77	0.52	0.75	0.08	0.17	0.09	0.87	1.17	0.53	0.87	3.84	5.47	5.11	0.19	0.24	0.18	1.31	1.3	1.72	0.06	0.04	0.02	1.57	0.06	2.35	0.25
YDR032C	12.17	18.21	13.78	15.63	9.35	8.88	8.26	8.86	9	9.32	8.95	9.23	5.08	2.73	13.77	12.17	21.93	13.61	15.55	21.32	20.38	26.1	17.64	21.88	14.36	27.75	41.54	43.41	42.71	2.05	2.46	1.63	14.38	20.52	20.31	1.13	2.37	1.21	15.89	6.97	19.7	7.16
YDR033W	20.09	27.58	30.77	30.15	73.17	50.4	64.97	58.89	55.01	61.16	48.94	58.94	33.05	41.49	15.08	12.35	52.94	51.6	55.53	40.92	43.84	49.1	25.61	26.36	20.05	25.01	91.75	138.44	157.2	2.72	2.28	2.53	11.17	11.84	18.25	0.9	1.01	0.89	30.41	38.86	32.56	42.72
YDR034C	21.79	13.49	24.11	10.96	64.74	55.11	58.83	49.13	61.95	72.05	59.23	78.76	12.26	1.85	15.55	1.32	31.29	33.7	33.6	5.18	5.18	6.04	32.1	30.29	27.66	35.43	85.14	212	214.41	8.97	8.41	7.91	34.32	33.41	44.56	2.43	4.45	2.68	40.64	7.66	47.67	11.58
YDR035W	17.15	15.34	18.53	13.27	61.87	46.15	60.13	52.23	63.43	71.25	64.92	74.37	16.33	11.92	16	7.92	26.56	23.27	27.97	18.66	18	25.61	29.31	26.34	30.51	42.06	98.17	194.96	224.92	6.16	6.08	6.03	28.38	29.2	32.02	2.03	3.87	2.24	35.89	21.55	38.21	17.01
YDR036C	9.26	7	9.03	5.25	30.84	28.69	23.43	26.24	26.66	28.74	24.81	29.43	4.06	0.52	5.52	1.02	25.01	26.45	23.93	6.83	6.25	6.97	9.06	8.03	7.75	8.91	23.7	47.92	55.53	1.82	1.28	1.52	7.87	10.01	10.41	0.45	0.84	0.48	9.28	1.04	9.28	2
YDR037W	89.92	93.35	82.98	76.69	348.84	271.91	311.1	277.61	258.32	322.32	287.37	347.56	44.64	41.43	65.42	36.64	212.31	219.45	171.62	145.98	142.17	184.23	128.34	103.93	102.06	142.7	305.93	478.11	521.19	23.95	23.28	24.55	84.03	90.79	91.44	9.42	11.02	8.76	89	32.82	91.98	36.71
YDR038C	0.98	0.32	1.25	0.36	5	3.3	4.75	3.58	5.52	6.26	4.42	3.88	0.82	0.02	0.36	0.02	2.77	2.48	2.49	0.18	0.14	0.06	1.19	0.8	1.4	1.32	2.58	5.79	8.4	0.05	0.04	0.14	1.26	1.6	1.56	0.03	0.06	0.02	1.38	0.15	1.69	0.19
YDR040C	0.55	0.23	0.66	0.17	1.87	0.98	0.81	0.92	1.44	1.73	1.12	0.98	0.5	0.03	0.34	0.02	1.23	0.75	1.15	0.42	0.35	0.43	1.08	0.64	1	0.7	3.7	6.75	9.52	1.27	0.93	1.04	2.77	1.68	2.25	0.48	0.19	0.21	2.75	0.33	2.88	0.27
YDR041W	10.04	7.2	10.78	5.43	14.06	11.83	12.55	10.97	15.62	14.3	12.09	13.86	5.65	1.07	5.9	0.78	12.78	8.63	9.43	2.37	2.73	2.96	13.59	14.31	9.85	14.1	25.76	63.51	70.44	2.44	2.37	2.63	14.31	14.49	19.04	0.95	1.58	0.85	19.62	5.02	22.27	7.38
YDR042C	0.34	0.55	0.53	0.38	0.71	0.48	0.46	0.51	1.06	0.69	0.51	0.56	0.08	0.53	0.39	0.24	0.68	0.68	0.61	0.28	0.51	0.65	0.59	0.55	0.91	1.08	1.75	2.25	2.1	0.89	0.84	0.74	0.31	0.56	0.3	0.26	0.11	0.2	0.4	0.11	0.48	0.17
YDR043C	7.57	10.92	8.29	9.48	8.48	9.26	9.92	10.95	13.99	14.36	11.38	12.43	5.58	8.09	6.95	6.54	13.25	11.02	10.7	17.54	16.58	20.45	7.18	11.75	3.51	7.88	18.14	40.2	54.06	6.33	5.53	4.71	4.1	4.14	6.3	0.83	0.39	0.94	7.83	10.41	9.58	20.83
YDR044W	3.1	1.83	3.08	1.55	10.56	9.96	7.05	7.21	17.44	16.54	10.86	13.12	4.03	1.36	1.51	0.22	6.72	6.13	5	0.91	1.17	1.14	2.78	2.91	2.15	1.82	19.67	36.9	42.22	1.51	1.39	1.39	4.61	5.28	5.95	0.19	0.16	0.13	7.58	1.17	7.69	1.94
YDR045C	3.02	1.94	2.94	1.45	3	2.65	1.74	2.16	3.55	3.41	2.97	2.58	1.33	0.24	1.37	0.1	2.47	1.27	1.36	0.42	0.35	0.37	3.73	3.18	2.89	3.93	8.55	15.92	13.65	0.87	1	1.23	3.11	3.21	4.31	0.33	0.45	0.4	4.16	0.19	4.26	0.52
YDR046C	109.36	155.45	128.25	137.5	159.92	131.33	145.69	133.17	133.82	143.3	124.25	149.65	37.5	44.92	80.45	57.3	137.33	128.83	133.47	112.11	113.59	137.23	134.05	123.09	116.15	155.68	144.12	298.43	346.06	9.27	9.89	9.35	100.74	71.8	82.21	2.47	4.59	1.7	85.63	89.84	90.87	75.01
YDR047W	8.19	7.33	10.67	7.48	17.51	15.63	15.25	13.71	18.42	16.75	12.29	12.99	7.7	5.98	4.32	2.62	12.78	11.52	12.88	6.78	7.13	8.67	13.32	13.31	10.9	13.13	30.61	51.05	59.87	0.75	1.18	0.81	8.99	8.98	10.43	0.12	0.28	0.13	10.12	6.53	11.02	5.87
YDR049W	17.57	9.41	19.5	7.89	42.3	30.62	33.72	28.31	38.91	36.92	26.84	32.17	8.73	0.9	8.54	0.61	23.44	20.93	23.86	2.16	2.38	2.68	22.04	16.16	19.28	19.48	56.06	135.47	138.65	4.68	4.83	4.7	20.4	21.78	25.78	0.77	1.58	0.77	24.96	3.37	28.3	4.33
YDR050C	35.71	53.14	44.38	53.19	38.37	32.44	35.29	35.04	54.33	45.33	37.66	37.09	59.83	119.65	24.25	30.44	38.67	31.67	31.25	61.78	52.3	60.15	51.14	53.29	35.1	43.16	393.35	395.22	395.99	7.5	7.67	7.54	94.91	111.41	123.34	5.32	5.44	6	136.28	113.43	155.54	140.9
YDR051C	14.36	8.77	15.57	8.19	17.28	14.23	13.05	11.57	18.27	19.15	14.86	14.24	8.39	0.69	8.68	0.46	12.95	11.61	9.13	1.38	1.85	1.14	18.35	18.01	13.95	18.81	47.48	112.88	102.31	3.74	4	3.66	18.29	18.68	24.06	1.05	1.1	1.1	23.77	6.01	25.12	6.47
YDR052C	31.58	24.62	34.64	20.76	85.73	71.94	74.19	67.57	76.03	75.09	61.64	70.22	18.08	8.79	19.48	4.98	53.15	50.6	52.23	17.09	20.19	18.21	43.94	46.55	36.2	45.15	111.9	280.66	287.8	10.72	10.89	10.85	43.94	40.62	52.39	3.59	6	3.35	47.25	16.94	52.36	24.62
YDR054C	31.74	28.93	34.1	24.85	70.32	58.01	61.38	53.24	73.08	70.88	58.25	67.91	15.55	9.7	19.8	13.36	58.31	52.06	62.2	46.46	45.96	51.65	53.05	49.98	44.74	57.54	115.26	251.48	258.6	7.68	7.96	7.42	43.68	44.84	51.66	2.33	3.76	2.84	56.81	47.26	60.86	60.95
YDR055W	22.59	32.25	31.59	35.65	105.38	90.88	99.56	96.43	58.54	65.12	56.22	66.97	36.12	57.75	23.61	21.18	114.12	105.34	94.71	126.34	125.47	151.64	38.77	55.49	26.05	44.31	105.63	198.82	220.09	3.7	3.2	3.14	34.09	32.74	47.69	5.06	6.66	7.22	55.38	63.57	71.78	129.78
YDR056C	8.04	4.96	8.19	4.3	10.35	8.76	8.44	7.69	16.43	13.88	11.91	12.37	5.43	1.04	4.49	0.75	8.57	6.16	6.05	1.53	1.72	1.49	10.76	9.9	7.89	10.15	30.35	52.66	54.13	1.39	1.27	0.97	9.69	12.1	12.46	0.38	0.7	0.37	13.79	1.77	13.42	1.98
YDR057W	8.53	4.59	9.86	3.98	17.3	13.56	15.89	12.05	17.84	17.82	11.85	15.19	5.27	0.39	4.03	0.38	10.42	9.5	10.25	1.38	1.2	1.36	10.19	8.58	8.85	11.03	31.13	66.49	73.46	2.5	2.12	1.93	10.23	11	13.14	0.86	0.6	1.19	13.66	2.47	14.2	1.78
YDR058C	1.77	0.58	2.55	0.76	3.9	4.53	3.33	2.55	3.45	3.25	2.81	2.66	1.13	0.09	0.83	0.04	3.93	3.16	3	0.16	0.44	0.3	1.25	1.16	1.08	1.27	7.69	13.75	15.06	0.13	0.14	0.11	2.35	3.03	3.32	0.01	0.04	0.04	3.45	0.71	3.96	0.67
YDR059C	2.64	1.51	2.81	1.44	4.4	4.58	3.97	3.95	5.44	4.71	3.66	4.39	1.69	0.34	1.64	0.25	5.15	3.54	3.21	1.3	1.46	1.83	3.81	3.63	2.88	3.87	11.12	20.1	25.28	0.92	0.8	0.87	3.13	2.65	3.79	0.11	0.15	0.07	5.56	0.37	6.96	0.59
YDR060W	82.21	59.37	85.85	50.42	191.9	139.68	160.62	126.67	174.32	172.7	141.48	173.54	36.84	6.95	37.8	4.75	101.57	101.84	103.3	16.79	21.51	20.99	104.69	73.19	94.51	114.68	191.97	417.74	413.28	28.25	26.17	28.24	69.4	84.97	83.18	12.42	19.13	13.52	82.31	16.08	69.44	11.65
YDR061W	9.68	6.92	12.02	5.85	22.83	19.34	20.73	19.31	22.81	22.45	16.84	21.55	6.17	3.11	6.1	1.66	15.93	14.45	16.35	7.06	7.1	7.31	13.11	11.71	11.4	15.31	46.06	99.13	98.8	5.46	5.56	6.36	15.53	16.12	19.02	3.06	3.62	3.65	22.1	8.98	24.24	8.31
YDR062W	18.02	12.12	21.43	10.77	50.28	41.5	45	37.38	39.62	47.41	31.43	42.18	14.79	5	10.57	1.78	30.5	31.65	31.11	8.78	8.85	9.69	30.74	27.51	25.36	32.82	84.96	146.48	168.69	4.73	4.62	4.89	27.69	29.69	34.79	1.71	2.59	1.71	34.87	14.35	34.73	13.36
YDR063W	5.29	2.57	5.55	2.14	7.64	7.15	6.49	5.23	6.7	7.32	6.42	5.91	4.03	0.72	3.06	0.26	6.17	4.34	4.65	1.43	1.46	1.9	8.63	10.4	5.68	8.48	20.27	33.28	35.85	1.62	1.41	1.46	6.27	8.26	8.67	0.49	0.55	0.45	11.04	0.95	11.3	1.32
YDR064W	20.5	17.29	19.76	16.77	31.26	34.25	30.24	26.4	26.39	29.06	24.78	28.9	10.17	7.57	12.12	6.35	25.08	24.99	18.77	16.68	18.92	21.34	24.55	28.49	19.88	32.61	65.1	66.97	68.76	4.73	4.43	4.06	12.92	12.15	17.15	2.45	1.97	2.44	17.27	12.05	20.53	13.76
YDR065W	3.5	0.83	3.93	0.9	10.98	8.98	8.18	8.17	9.05	7.78	5.91	7.61	1.24	0.07	1.43	0.06	5.57	5.52	6.15	0.37	0.46	0.24	4.63	4.14	4.53	4.68	10.82	24.2	25.7	0.25	0.28	0.33	2.86	3.1	4.03	0.04	0.07	0.07	5.51	0.8	4.67	0.71
YDR066C	1.18	0.35	1.27	0.41	1.76	1.5	1.1	1.52	1.71	1.7	1.29	1.41	0.4	0.04	0.58	0.01	1.15	1.32	0.61	0.15	0.06	0.06	1.22	0.87	0.87	1.17	3.43	4.82	4.76	0.23	0.24	0.17	1.1	1.02	1.11	0.05	0.07	0.05	1.35	0.07	1.56	0.06
YDR067C	7.12	3.76	7.08	3.52	8.53	7.43	7.25	7.32	9.68	9.48	8.61	9.42	3.22	0.34	4.16	0.26	7.57	5.86	5.49	1.25	1.52	1.38	8.95	8.85	6.65	9.27	19.63	39.23	39.77	2.54	2.48	2.1	8.23	9.12	11.16	0.68	0.64	0.63	11.15	1.45	12.89	3.05
YDR068W	17.38	10.02	18.12	8.24	25.94	22.19	21.02	18.14	24.24	25.57	19.27	23.6	10.97	1.1	11.41	0.66	21.08	16.36	16.33	2.86	2.72	2.72	25.87	23	20.83	27.33	65.55	134.34	146.28	5.55	4.97	4.75	27.4	31.55	37.14	1.14	2.25	1.48	36.76	7.51	39.57	8.46
YDR069C	21.5	21.41	26.99	20.56	53.18	45.4	49.12	45.53	41.15	48.96	36.56	46.22	7.54	3.71	15.05	7.92	47.75	48.51	52.06	29.21	31.37	37.47	31.14	31.73	27.1	35.78	69.61	154.68	167.01	10.01	8.82	7.85	27.67	28.34	34.98	3.3	5.24	2.85	29.25	8.11	30.72	14.98
YDR070C	0.56	0.39	0.5	0.28	0.61	0.75	0.75	0.83	0.58	0.59	0.51	0.53	2.28	2.98	0.92	0.84	3.4	2.79	2.67	6.13	4.92	7.05	0.84	0.98	0.43	0.78	1.64	2.09	2.73	0.02	0.04	0.03	0.24	0.46	0.65	0.01	0.01	0.01	1.19	0.82	1.79	1.24
YDR071C	17.44	10.63	17.97	10.03	15.7	15.01	11.97	12.86	18.25	15.77	15.99	16.84	8.43	2.85	10.12	2.11	15.21	11.11	10.04	4.97	5.69	5.65	30.21	32.6	20.32	32.77	47.44	70.83	71.14	2.65	2.6	2.23	16.35	17.5	20.98	0.83	0.87	0.93	20.86	3.74	22.52	6.85
YDR072C	10.83	12.34	12.67	12.86	36.24	32.69	32.1	31.13	35.56	36.2	31.03	33.61	7.5	7.08	7.41	4.73	32.03	29.81	29.75	25.28	27.4	31.39	12.47	13.17	9.41	13.28	24.52	53.14	56.02	1.4	1.41	1.15	10.84	6.89	11.46	0.38	0.45	0.38	16.89	13.67	18.01	17.2
YDR073W	5.87	6.52	5.42	5.12	9.19	9.91	8.87	8.79	12.83	11.4	10.86	11.44	4.74	5.84	4.02	3.11	11.99	8.13	7.98	12.15	12.14	13.5	7.76	10.65	4.52	8.85	11.68	24.76	27.38	1.12	1.06	0.82	5.35	4.91	5.83	0.22	0.2	0.24	9.45	5.26	11.53	12.88
YDR074W	34.89	39.04	46.19	36.35	107.83	96.66	115.92	104.47	91.53	121.75	77.39	99.22	109.43	160.74	49.15	32.26	175.5	147.62	160.71	199.83	158.57	206.19	51.96	73.67	24.38	40.63	186.93	371.11	452.64	7.18	6.82	5.94	41.44	43.05	55.11	1.26	1.9	1.23	113.1	115.44	131.83	182.24
YDR075W	13.47	8.08	13.35	6.47	31.61	25.39	22.5	22.11	29.84	30.66	25.14	30.57	4.98	0.3	7.7	0.54	17.93	15.31	17.85	1.96	2.11	2.05	17.98	15.11	18.33	18.61	32.18	82.81	78.71	4.61	3.69	3.78	13.73	12.38	16.16	1.2	1.77	1.19	15.98	3.25	16.07	4
YDR076W	2.74	1.49	3.01	1.14	9.03	7.65	6.76	7.26	9.45	9.38	7.23	10.06	0.81	0.17	1.32	0.09	5.23	4.41	5.72	0.52	0.56	0.39	2.23	1.48	2.16	2.84	12.8	29.83	31.93	1.8	1.52	1.91	4.35	5.45	5.91	0.44	0.67	0.58	6.31	0.86	6.1	1.51
YDR077W	205.08	328.1	253.78	263.01	1498.58	1474.54	1453.13	1440.03	991.83	1303.27	900.25	1010.36	435.16	505.03	246.5	163.68	2212.95	1857.26	1667.32	1880.78	1392.45	1901.45	252.77	363.5	136.18	227.18	2149.26	3360.69	3480.06	182.27	197.72	210.67	239.97	211.09	290.06	71.06	69.23	85.68	776.93	426.82	863.26	1314.19
YDR078C	0.59	0.34	0.65	0.26	0.55	0.55	0.38	0.21	0.78	0.64	0.51	0.64	0.26	0.11	0.36	0.08	0.57	0.34	0.38	0.06	0.13	0.04	0.66	0.89	0.59	0.57	1.34	2.57	2.94	0.3	0.44	0.32	0.71	0.77	0.93	0.09	0.1	0.07	0.84	0.11	0.96	0.21
YDR079C-A	3.16	1.72	3.37	1.23	1.24	1.43	0.84	1.1	2.02	1.84	1.99	1.49	1.48	0.08	1.78	0.08	1.53	1.05	0.99	0.15	0.13	0.19	4.08	3.77	2.41	3.92	9.85	12.54	9.73	0.57	0.73	0.6	4.2	4.49	5.47	0.17	0.36	0.16	6.88	0.17	7.14	0.6
YDR079W	3.29	1.56	3.83	1.34	3.19	3.63	2.78	2.43	3.93	3.92	4.06	4.36	2	0.23	2.3	0.17	2.85	2.02	2.04	0.49	0.32	0.43	6.84	7	5.03	7.13	10.45	21.63	20.31	0.53	0.49	0.48	3.93	5.21	5.85	0.1	0.17	0.1	6.61	1.8	5.83	1.29
YDR080W	14.06	6.73	17.27	5.82	42.85	34.37	31.98	29.43	32.86	35.74	28.75	36.77	7.52	0.23	8.2	0.19	24.33	24.52	23.04	1.01	1.8	1.38	15.17	11.82	11.83	12.39	49.46	116.98	118.83	3.27	3.1	3.31	16.93	17.69	21.61	0.49	1.15	0.41	27.09	2.44	25.88	2.36
YDR081C	20.08	16.89	23.35	14.03	72.09	55.76	59.44	53.86	62.45	68.27	52.74	62.4	10.66	2.13	11.84	1.27	42.88	40.76	43.87	7.74	7.86	9.1	25.18	20.62	22.64	26.24	66.81	159.99	168.06	12.42	11.7	12.11	26.85	25.39	30.97	3.41	5.02	4.01	28.5	5.6	30.47	8.41
YDR082W	5.73	3.6	6.13	2.99	12.3	10.76	10.12	9.9	12.42	12.12	9.5	10.72	1.72	0.08	3.09	0.11	8.15	6.54	7.25	0.57	0.9	0.76	4.96	3.59	4.92	4.72	14.26	38.99	39.28	1.85	1.48	1.68	4.72	4.84	6.02	0.31	0.52	0.43	4.99	0.63	5.75	0.9
YDR083W	29.21	14.95	26.31	11.14	65.58	53.91	47.11	44.96	65.57	66.59	54.52	67.45	11.68	0.75	16.2	0.69	31.54	27.67	26.56	2.08	2.79	2.42	41.4	27.66	36.94	41.52	61.63	136.19	134.1	4.29	3.52	3.63	24.37	29.13	29.2	2.26	3.92	2.35	28.15	2.25	24.62	1.67
YDR084C	3.89	2.33	3.66	1.62	5.87	6.33	5.22	5.46	5.22	6.47	5.18	4.66	2.17	0.08	2.46	0.13	6.83	6.02	3.52	0.75	0.7	0.47	4.43	4.53	2.97	3.39	12.91	20.98	23.81	0.63	0.41	0.61	5.03	5.4	6.2	0.18	0.24	0.21	6.21	0.32	8.05	0.79
YDR085C	2.23	2.15	3.45	2.43	7.72	5.63	6.96	6.18	7.31	8.36	4.31	6.09	2.28	1.94	1.43	0.98	9.74	8.04	11.68	7.5	6.75	8.15	3.79	5.74	1.88	3.92	28.7	55.79	60.92	3.5	2.66	2.29	2.77	2.4	3.61	0.23	0.19	0.29	13.84	22.52	14.7	26.83
YDR086C	18.57	14.3	18.06	10.93	29.16	27.59	23.02	23.42	34.75	34.07	29.98	29	12.14	5.81	11.22	3.21	30.62	21.72	18.07	11.23	11.03	12.08	37.11	39.51	27.72	39.5	83.61	103.07	106.09	4.37	4.29	3.68	25.1	25.31	30.8	1.99	2.49	1.86	32.71	14.8	34.3	17.23
YDR087C	13.18	8.65	12.66	6.23	16.99	14.11	14.32	11.78	21.35	20.86	14.79	16.26	5.42	0.93	5.9	0.81	10.27	8.75	10.11	1.14	1.46	1.53	14.48	9.7	16.32	14.92	32.03	69.7	57.91	2.77	2.82	2.83	11.74	14.4	15.86	1.22	1.77	1.26	11.5	2.21	10.34	1.62
YDR088C	12.7	5.75	13.37	4.54	29.87	27.29	23.77	23.26	28.38	29.3	21.88	28.29	5.69	0.4	8.3	0.48	19.93	18.84	16.14	1.48	1.59	1.57	15.91	16.78	12.57	17.82	48.86	110.38	108.82	1.35	1.45	1.37	16.61	16.98	18.96	0.25	0.32	0.15	25.83	1.9	27.29	2.67
YDR089W	16.78	18.41	21.05	14.88	29.58	26.99	27.95	24.8	27.55	26.53	19.81	23.15	11.31	11.65	9.03	4.72	16.84	17.52	18.72	9.65	10.35	10.33	20.08	22.24	12.81	16.37	36.84	79.67	93.62	1.83	1.38	1.36	14.77	11.19	17.15	0.57	1.3	0.64	22.53	9.98	26.48	14.63
YDR090C	2.99	2.07	3.56	2.02	6.37	5.03	4.55	4.89	6.35	6.13	4.82	5.43	1.64	0.26	1.96	0.18	3.79	3.77	3.85	0.86	1.03	0.93	4.32	3.32	2.91	3.65	10.86	27.09	31.09	1.3	1.32	1.2	5.01	5.58	7.07	0.51	0.56	0.48	6.72	1.32	5.95	2.47
YDR091C	9.28	7.62	11.63	6.8	23.65	18.54	21.83	16.92	23.82	24.74	18.58	22.72	7.27	3.15	4.58	1.22	13.42	12.29	15.04	4.35	4.41	5.18	15.39	12.44	14.43	15.53	31.5	60.54	63.65	4.29	4.23	3.74	8.48	9.14	11	1.6	2.04	1.98	10.66	4.16	10.57	3.44
YDR092W	7.48	5	8.08	4.06	8.35	7.03	6	6.91	10.41	8.31	7.99	7.98	6.05	0.87	5.4	0.37	8.61	5.43	4.93	1.33	1.44	1.53	7.68	7.2	5.43	6.98	37.1	60.06	57.84	1.51	1.68	1.59	10.28	12.22	14.08	0.43	0.84	0.37	16.89	1.04	18.82	2.17
YDR093W	28.81	21.21	36.93	21.91	74.09	51.21	68.11	52.46	66.83	69.01	50.13	59.28	22.16	9.65	16.34	4.64	38.41	42.03	48.87	15.35	17.21	17.43	44.86	39.16	39.01	47.65	115.75	244.88	263.43	8.65	7.37	7.07	34.77	32.51	39.67	1.99	3.91	1.75	44.18	23.58	47.52	15.34
YDR096W	16.76	15.28	23.06	12.7	65.95	49.83	58.22	50.42	48.46	61.63	36.03	48.19	21.29	20.11	11.26	4.11	43.45	42.85	50.04	25.52	22.57	27.29	24.84	32.79	15.55	24.05	78.39	174.06	211.68	2.56	2.46	2.3	18.1	15.59	22.78	0.52	1.16	0.52	39.45	25.47	44.26	55
YDR097C	19.35	12.46	22.23	12.83	75.4	53.98	64.8	53.01	40.17	44.13	34.58	43.16	15.47	5.54	13.19	2.39	32.13	34.01	34.51	8.79	10.13	10.48	26.98	20.44	21.23	25.43	88.09	194.96	220.65	8.33	7.46	8.15	29.2	28.69	33.05	2.3	3.42	1.99	35	6.02	32.81	4.28
YDR098C	17.59	10.96	17.62	10.64	22.99	19.76	18.12	17.56	24.92	23.41	19.18	18.97	7.41	2.58	10.32	2.16	18.93	16.02	13.44	5.83	6.13	6.6	23.17	25.68	19.99	24.34	65.36	112.39	105.18	3.87	3.66	3.37	27.08	28.71	31.55	1.42	1.63	1.11	28.71	6.43	31.58	7.35
YDR099W	21	17.36	23.04	15.46	44.83	38	40.24	36.71	49.97	51.86	37.48	40.66	23.42	17.98	12.56	6.33	39.05	34.38	37.12	21.52	21.09	24.27	31.12	32.74	22.99	29.89	138.18	198.9	223.73	10.34	10.29	10.47	27.09	33.76	36.98	2.97	4.93	3.82	49.49	17.55	50.9	34.38
YDR100W	7.71	4.82	7.45	4.49	5.29	6.05	5.48	5.49	6.02	6.07	5	5.85	5.68	0.95	5.41	0.64	7.91	4.79	4.65	1.53	1.38	1.36	9.95	13.67	6.16	11.54	20.04	34.25	35.36	1.57	1.16	1.18	7.16	7.47	9.38	0.55	0.58	0.42	12.36	1.97	14.93	4.71
YDR101C	37.01	24.06	34.65	20.09	79.99	68.06	64.45	59.12	70.21	77.83	65.34	82.41	11.49	4.19	18.97	3.07	41.71	43.42	35.1	8.13	11.06	10.96	43.35	30.54	38.71	46.56	70.66	151.47	148.59	7.94	7.64	7.95	25.21	28.2	29.95	3.5	4.96	4.01	26.61	3.96	24.67	4.43
YDR103W	25.64	20.23	29.4	16.88	96.08	78.02	80.95	68.19	70.39	83.1	66.54	86.93	16.25	6.63	15.98	4.08	53.42	55.65	55.67	18.26	18.99	21.31	36.71	34.78	28.65	38.38	87.27	196.65	231.78	7.42	6.4	6	28.88	26.48	31.82	1.96	3.16	2.15	36.65	12.9	41.87	16.96
YDR104C	7.81	3.53	8.72	3.16	32.45	24.86	26.33	21.61	26.26	29.06	19.54	22.48	4.55	0.08	4.84	0.07	18.21	18.7	18.72	0.81	0.97	0.43	5.53	3.47	4.68	4.47	39.16	86.34	99.36	1.86	1.79	1.7	10.81	12.15	14.1	0.46	0.55	0.41	14.84	2.27	15.18	2.57
YDR105C	4.48	3.12	5.98	2.45	10.77	8.35	8.23	7.26	12	10.47	7.96	8.81	3.88	0.28	2.54	0.09	7.44	6.45	7.53	1.07	1.01	1.04	4.55	3.7	3.31	3.44	14.63	29.18	33.89	1.15	1.31	1.26	5.85	5.47	7.05	0.27	0.89	0.3	7.56	1.69	9.26	1.89
YDR106W	0.34	0.27	0.35	0.2	0.71	0.5	0.58	0.3	0.91	0.85	0.78	1.06	0.31	0.03	0.21	0.02	0.47	0.36	0.49	0.05	0.13	0.09	0.26	0.3	0.19	0.3	1.49	3.3	3.5	0.31	0.26	0.18	0.34	0.28	0.34	0.07	0.24	0.16	0.59	0.11	1.08	0.13
YDR107C	3.17	1.49	3.67	1.29	6.11	5.3	6.18	4.94	6.78	5.81	4.46	5.27	2.35	0.11	1.92	0.13	4.32	4.14	3.78	0.29	0.28	0.19	3.5	3.48	2.89	3.6	13.47	25.89	30.88	0.56	0.43	0.47	3.88	4.1	4.94	0.1	0.31	0.13	5.59	0.99	6.63	1.16
YDR108W	4.98	2.94	5.9	2.35	13.3	10.11	11.19	9.64	13.28	13.21	9.99	11.12	3.18	0.18	2.96	0.18	7.12	7.5	7.81	0.68	1.01	0.76	5.7	4.57	5.93	7.06	22.55	49.2	54.76	1.68	1.23	1.2	6.76	6.8	9.6	0.35	0.6	0.32	11.2	1.17	10.87	1.7
YDR109C	7.04	4.58	7.91	3.91	20.28	15.73	16.82	14.79	15.95	16.43	11.67	13.68	4.05	2.17	3.93	0.39	12.78	12.63	12.41	1.53	1.58	1.66	7.87	5.9	7.44	9.09	27.88	63.75	71	2.95	2.76	2.76	8.5	9.12	10.63	1.02	1.39	0.92	11.6	3.85	13.67	3.01
YDR110W	12.55	8.63	13.89	7.96	29.55	24.54	22.27	21.67	22.35	22.21	20.5	24.56	5.76	0.77	8.33	0.98	17.14	15.54	19.1	2.99	3.38	3.34	16.48	12.96	14.92	20.02	29.86	75.65	79.06	2.82	2.32	2.66	12.95	13.47	14.8	0.61	0.93	0.84	15.57	2.32	15.97	2.24
YDR111C	6.05	5.49	7.18	5.39	16.67	14.08	13.77	10.7	20.69	20.86	15.35	18.17	5.14	4.66	3.71	1.78	8.87	10.18	11.31	4.11	4.31	4.1	9.48	9.95	6.39	8.46	34.79	71.31	80.67	2.21	2.45	2.27	10.93	10.28	13.16	0.79	1.9	0.93	13.49	7.55	15.89	5.66
YDR113C	10.74	5.17	9.88	4.67	24.49	22.56	22.35	20.89	23.26	20	19.3	18.89	8.81	1.04	7.73	0.62	17.52	15.16	14.55	2.35	2.7	2.85	15.18	14.81	10.42	13.38	35.39	75.41	81.37	0.95	1.24	1.12	17.1	16.15	21.71	0.43	1.13	0.54	20.16	4.7	24.39	6.84
YDR115W	4.81	2.96	3.9	2.56	3.4	3.2	2.93	2.94	4.71	4.1	3.75	3.57	2.4	0.36	2.47	0.15	3.94	2.57	3.03	0.47	0.87	0.58	4.72	4	3.21	4.34	9.37	18.73	21.29	0.66	0.72	0.72	4.93	5.03	5.99	0.28	0.45	0.26	6.53	0.73	7.94	1.67
YDR116C	13.74	7.96	13.09	6.73	20.99	19.11	17.14	15.06	22.81	24.13	19.65	19.8	6.67	0.77	8.34	0.53	18.59	15.31	11.31	2.58	2.25	2.39	16.63	17.97	11.02	16.74	35.72	72.2	81.3	1.54	1.52	1.66	15.16	14.87	18.92	0.65	0.72	0.59	17.89	2.45	21.41	5.31
YDR117C	10.94	6.3	12.66	6.06	21.52	17.21	17.22	15.87	20.46	17.87	14.9	17.4	8.56	0.4	5.72	0.33	14.46	12.91	13.28	1.48	1.35	1.21	13.93	11.75	10.29	12.21	46.99	96.07	100.55	2.47	2.44	2.27	13.41	13.63	16.83	0.56	0.97	0.54	17.41	3.07	19.27	3.44
YDR118W	3.72	2.44	4.1	2.36	5.53	4.88	5.86	4.55	6.6	6.15	4.37	5.16	2.33	0.25	2.04	0.15	3.78	3.98	4.11	0.34	0.45	0.41	3.57	3.54	3.14	4.74	14.07	27.66	28.43	1.28	1.12	1.12	4.44	4.33	5.33	0.33	0.47	0.27	6.1	1.32	7.26	1.94
YDR119W	12.48	8.67	14.26	7.38	33.08	25.77	26.79	24.61	29.28	28.85	23.69	29.4	8.9	2.92	7	1.54	20.12	19.25	18.42	5.35	5.35	5.39	17.03	17.24	13.04	18.3	32.85	60.06	67.85	3.58	3.17	2.89	9.57	12.5	12.39	1.13	1.56	1.3	14.44	4.69	15.06	4.19
YDR120C	21.27	13.9	20.16	10.26	46.62	37.02	34.33	32.33	44.91	44.03	38.61	46.86	9.38	1.26	11.05	0.86	26.61	24.74	23.04	3.34	3.35	3.54	21.64	13.99	21.21	23.4	56.7	113.84	99.36	5.3	5.13	5.38	21.82	27.64	27.26	2.47	2.94	2.77	25.64	2.08	21.94	2.3
YDR121W	10.96	7.34	11.89	5.39	16.57	12.33	11.92	9.73	17.89	15.58	13.3	13.3	5.68	0.43	6.38	0.39	11.27	8.7	9.67	1.04	1.14	1.36	11.23	7.11	8.9	10.44	29.49	58.05	54.69	2.67	2.58	2.34	15.19	16.34	18.39	0.82	1.4	0.86	17	1.92	15.99	1.95
YDR122W	24.07	20.94	31.96	18.78	69.93	54.03	63.12	54.55	58.27	60.97	43.97	53	27.47	5.73	18.65	1.99	57.55	54.05	66.61	12.45	12.55	13.63	32.1	34.38	21.29	27.81	126.05	271.82	310.63	11.13	11.79	10.04	37.03	38.41	49.21	3.12	5.05	3.52	53.32	18.91	61.89	19.77
YDR123C	9.68	5.2	8.47	4.29	32.53	30.14	29.92	28.03	35.51	38.14	28.38	34.33	3.83	2.13	5.71	0.94	23.69	22.31	20.11	4.48	4.9	5.7	11.87	11.8	11.85	16.73	54.27	149.46	150.62	2.49	2.39	2.52	18.12	20.73	25.74	0.39	1.03	0.57	19.05	6.66	24.46	12.5
YDR124W	0.83	0.66	1.12	0.5	1.55	1.75	1.22	1.42	3.45	3.41	2.32	2.42	0.68	0.6	0.42	0.22	0.96	0.82	1.71	0.92	0.79	0.93	0.71	0.6	0.72	1.05	4.74	12.3	15.9	1.07	1.32	1.42	1.75	1.77	2.17	0.38	0.51	0.41	3.64	2.47	3.99	3.76
YDR125C	1.32	0.39	1.47	0.37	6.32	5.33	4.75	4.25	4.81	5.65	3.73	5.88	0.72	0.04	0.82	0.02	3.62	3.59	3.28	0.15	0.24	0.24	1.04	1.1	0.93	0.99	7.32	15.36	15.2	0.28	0.31	0.24	2.12	1.89	2.29	0.03	0.07	0.03	2.48	0.46	3.68	0.16
YDR126W	1.61	0.65	1.15	0.69	4.24	3.45	3.16	2.73	6.1	5.57	4.15	4.44	1.04	0.12	0.93	0.09	2.15	1.84	1.97	0.41	0.35	0.47	1.8	1.72	1.63	1.85	3.25	7.8	7.91	0.63	0.56	0.51	1.7	1.51	1.86	0.13	0.17	0.13	2.73	0.13	2.19	0.4
YDR127W	27.25	28.6	31.69	24.84	86.57	65.89	85.97	75.08	93.37	98.98	87.42	114.42	31.37	29.45	21.3	14.08	47.23	49.87	55.11	42.38	41.48	51.8	42.92	34.89	41.82	48.5	193.84	291.68	317.7	26	23.18	22.48	40.6	42.83	53.59	7.94	8.56	8.57	59.34	75.52	58.84	52.66
YDR128W	15.93	9.43	18.95	8.88	51.73	40.6	44.39	36.07	47.53	46.83	37.63	44.94	9.42	1.08	8.97	0.44	27.75	30.47	31.02	3.42	3.52	4.01	18.41	13.17	16.78	16.8	76.03	164.17	165.75	12.53	11.27	10.63	20.87	24.81	29.08	3.68	4.79	3.84	31.82	5.84	32.66	4.63
YDR129C	22.98	17.13	24.71	15.67	40.82	39.62	41.34	34.78	46.04	50.05	37.3	46.38	20.86	13.35	15.59	4.76	36.83	34.99	34.18	13.76	13.59	16.16	39.32	34.62	22.68	33.77	147.96	236.6	272.39	10.56	9.21	8.47	31.46	35.92	42.37	3.07	4.44	3.43	49.82	24.67	53.24	22.89
YDR130C	8.98	6.59	7.56	5.34	13.25	13.13	10.73	11	16.83	16.38	12.11	14.16	4.98	0.48	5.5	0.35	11.85	9.68	8.07	1.49	2.18	2.2	8.08	9.53	6.46	8.6	26.65	56.6	60.78	2.38	2.25	2.82	13.44	13.66	17.52	1.44	2.25	1.74	15.52	1.38	19.22	3.27
YDR131C	3.15	1.32	4.2	1.33	15.25	12.08	11.95	11.02	13.05	13.08	8.77	10.59	2.06	0.06	1.57	0.13	8.29	7.32	8.82	0.42	0.51	0.37	3.81	3.27	3.27	3.47	18.74	42.85	46.5	0.86	1	1.29	5.76	5.63	6.87	0.24	0.28	0.34	7.34	1.15	9.51	1.76
YDR132C	45.93	56.71	60.56	54.89	75.48	61.56	67.21	58.73	67.64	73.49	63.8	81.02	2.17	1.32	26.91	17.94	65.55	64.01	71.02	33.85	37.96	43.53	69.99	62.53	66.42	85.65	97.68	210.23	212.31	5.54	4.89	4.75	53.5	63.61	62.46	2.02	4.32	2.52	42.67	19.67	38.61	18.09
YDR135C	152.89	215.03	202.05	204.65	330.14	232.44	299.21	236.88	293.19	330.36	262.16	348.02	37.72	37.65	104.02	93.74	262.19	274	321.28	194.75	216.71	235.86	238.08	224.97	220.24	286.49	439.59	964.34	979.08	36.18	33.25	30.47	170.12	187.15	220.29	14.3	29.46	15.1	197.08	209.21	189.74	163.68
YDR137W	9.36	4.44	10.31	4.83	27.6	19.66	22.04	19.38	21.02	22.4	15.59	22.7	6.16	1.22	5.11	1.01	15.1	14.95	15.65	2.77	3.17	3.19	13.08	13.15	9.71	12.96	39.23	96.72	96.91	2.57	2.67	2.62	12.12	11.36	14.68	0.6	1.25	0.58	18.73	4.09	17.58	5.09
YDR138W	14.42	10.37	15.95	9.47	42.93	32.17	35.98	29.09	36.97	40.25	29.4	36.4	8.89	1.48	7.57	0.79	23.67	24.72	27	4.22	4.28	4.08	16.57	13.78	16	17.34	45.46	105.96	108.47	10.4	9.23	8.95	17.73	15.1	21.45	2.75	4.36	3.31	22.83	9.46	23.88	8
YDR139C	8.2	3.64	8.66	3.04	7.66	6.7	6.49	7.26	11.29	9.43	8.19	7.66	4.39	0.3	5.05	0.25	8.04	5.43	3.92	0.54	0.87	0.69	11.18	10.45	7.43	9.87	27.21	39.39	39.98	1.42	1.72	1.27	7.85	10.57	10.88	0.56	0.46	0.63	13.17	1.19	13.39	2.41
YDR140W	6.32	4.09	6.05	3.69	14.49	10.38	9.74	9.73	12.85	13.42	10.53	13.04	3.1	1.48	3.75	0.95	10.51	7.7	8.07	2.58	3.17	3.73	7.66	6.29	7.42	8.4	19.41	47.35	51.33	0.73	0.76	0.67	7.94	9.07	9.7	0.33	0.86	0.38	11.23	1.67	11.65	2.86
YDR141C	28.16	18.17	33.94	15.59	60.34	43.93	50.48	44.11	50.18	52.5	35.45	48.35	17.67	1.68	13.92	0.74	35.49	36.38	41.06	5.01	5.41	4.9	31.03	22.52	22.83	24.28	114.44	241.59	257.83	13.45	13.5	12.34	29.85	30.83	41.27	4.47	5.44	3.98	42.29	13.01	46.33	15.53
YDR142C	5.64	2.91	7.07	2.72	17.2	13.93	14.26	13.55	14.92	17.07	13.03	14.82	3	0.22	3.55	0.18	10.36	9.36	9.81	1.2	1.23	1.57	9.21	8.57	7.55	8.69	20.38	47.43	47.2	1.99	1.93	1.76	6.39	6.19	8.28	0.43	0.63	0.44	9.12	1.51	9.89	2.03
YDR143C	32.32	31.71	33.61	23.55	109.12	92.03	81.07	76.27	120.26	131.77	101.5	121.63	19.82	7.92	21.22	3.95	67.74	68.37	62.55	18.11	19.33	20.71	31.49	28.08	23.44	27.22	80.25	184.19	191.03	20.62	19.52	18.68	41.08	39.14	46.93	10.4	13.99	10	45.63	7.77	54.63	15.45
YDR144C	10.77	7.68	11.89	6.94	26.73	21.84	23.4	21.24	30.34	27.33	20.95	24.45	8.16	3.45	5.22	1.05	13.53	14.7	13.4	3.54	3.86	2.78	16.73	17.06	13.74	19.17	41.77	79.19	82.28	5.81	5.31	5.27	16.23	15.85	20.23	2.6	3.01	2.43	19.3	3.85	18.59	5.12
YDR145W	49.31	42.18	49.34	33.05	101.22	94.81	84.81	82.86	110	108.49	87.89	102.42	30.01	7.38	32.71	4.15	83.98	80.5	68.3	17.83	19.47	19.63	52.57	45.13	36.21	44.21	152.78	369.98	410.2	20.86	18.87	19.09	64.52	67.43	77.69	8.08	11.12	8.04	69.54	7.03	78.67	17.74
YDR146C	21.31	16.36	26.11	14.88	75.17	53.08	59.47	51.38	71.14	71.09	51.44	56.6	23.64	17.25	11.39	4.24	42.2	36.56	45.73	19	20.26	21.36	38.79	34.82	28.95	31.99	134.79	316.6	336.54	8.36	7.07	7.35	36.27	37.39	51.36	1.23	3.21	1.42	71.14	17.94	76.95	26.49
YDR147W	5.13	3.84	6.09	3.2	12.06	9.06	9.28	10.1	13.08	13.1	10.11	12.11	3.57	0.78	2.82	0.4	8.98	7.93	8.59	1.43	1.46	1.32	3.92	2.61	3.21	3.39	29.6	65.52	67.01	2.46	1.95	2.34	8.18	9.58	13.47	0.57	1.15	0.53	10.52	3.27	12.94	3.87
YDR148C	8.85	8.09	10.3	6.63	18.49	16.71	18.09	16.09	16.76	18.06	13.43	15.27	11.06	9.41	5.69	2.51	18.31	16.16	19.12	12.77	11.68	14.43	10.51	13.46	7.58	10.78	36.92	53.78	55.04	3.78	3.83	3.11	9.45	10.03	11.69	1.18	1.33	0.97	13.6	7.98	15.26	8.39
YDR150W	62.66	45.76	66.7	39.23	161.63	117.47	142.04	118.15	127.87	134.38	98.87	121.97	48.22	17.52	35.78	5.86	104.21	103.63	112.54	29.32	29.61	32.66	68.77	56.95	54.39	64.39	259.38	541.22	542.27	27.15	23.91	25.96	72.81	83.42	92.82	8.07	13.6	9.09	99.09	19.28	96.72	21.29
YDR151C	34.5	30.07	31.39	23.54	28.66	27.42	22.88	22.36	29.13	30.36	22.55	29.38	8.57	7.6	13.78	6.53	27.97	24.9	21.94	13.97	15.26	14.95	42.53	42.36	23.58	36.67	41.84	81.44	109.03	4.49	3.67	3.24	18.88	20.29	23.39	1.65	2.72	1.49	16.49	5.99	21.39	16.61
YDR152W	26.53	18.89	27.11	15.43	47.14	41.02	41.75	37.1	61.82	58.07	49.21	44.73	13.45	3.71	13.89	2.63	35.65	29.06	25.67	9.38	9.49	8.87	35.32	29.33	27.7	31.1	63.04	129.2	132.49	7.76	6.73	7.04	34.42	39.34	42.65	3.74	4.85	3.85	36.22	10.56	36.5	8.3
YDR153C	23.05	20.32	26.57	17.24	52.44	43.8	51.99	43.51	60.31	57.72	47.16	51.17	17.34	11.76	13.63	5.38	34.9	31.31	36.46	15.87	16.31	18.23	38.98	36.01	31.97	37.54	94.32	217.23	246.62	6.07	5.98	5.79	37.29	38.11	46.4	1.96	3.51	2.15	48.82	35.59	52.56	37.44
YDR155C	42.14	50	39.26	37.95	35.56	25.64	24.76	27	32.23	32.1	24.43	27.38	22.18	36.79	25.94	19.88	45.6	31.22	23.44	43.55	44.81	48.15	49.17	48.68	22.82	33.06	100.22	88.27	106.02	8.26	8	7.45	21.91	24.55	26.15	2.26	2.74	2.04	23.4	18.96	22.12	21.81
YDR156W	24	16.5	20.46	13.12	24.65	24.56	20.7	20.41	37.2	33	33.91	29.56	10.41	4.55	13.57	3.31	25.56	16.38	12.58	9.83	8.75	9.56	33.74	31.14	20.1	28.63	32.25	65.44	61.41	2.05	2.21	1.89	21.6	21.97	23.98	0.85	0.64	0.81	21.51	4.76	21.54	6.28
YDR158W	6.65	7.27	7.57	6.06	20.39	16.08	22.85	19.38	25.48	23.23	21.53	23.71	8.66	9.59	6.2	4.25	9.08	7.63	7.91	9.09	8.92	10.55	11.71	10.98	12.32	18.58	43.15	61.9	61.76	2.69	2.5	2.43	9.55	11.98	10.94	1.07	1.09	1.01	11.69	19.43	12.51	9.36
YDR159W	29.66	19.82	33.03	16.87	91.58	76.57	77.3	68.35	71.32	80.04	62.51	77.78	15.65	1.55	17.14	0.94	56.46	59.78	55.49	6.88	8.09	8.05	36.3	32.42	30.01	35.21	101.64	246.33	269.03	11.5	10.11	10.3	37.7	35.55	45.67	3.19	5.49	3.53	46.01	9.22	48.53	13.53
YDR160W	13.11	8.46	13.87	7.89	29.55	22.86	22.38	20.46	22.86	27.17	18.49	23.81	6.54	0.44	7.85	0.31	18.31	19.06	17.57	1.7	2.2	2.22	12.24	10.93	8.58	11.95	34.27	92.21	102.17	3.9	3.66	3.29	12.29	13.29	16.65	1.04	1.87	1.31	16.22	3.98	22.12	4.84
YDR161W	13.83	8.77	14.01	7.41	27.63	24.06	23.14	20.32	29.56	27.38	25.19	25.52	5.39	0.51	6.59	0.59	17.69	17.06	15.18	2.06	2.8	2.42	17.37	10.43	15.1	16.21	29.82	57.48	54.48	2.06	1.8	1.66	12.53	14.82	14.2	1.13	1.44	1.1	12.09	2.44	10.77	1.71
YDR162C	16.89	9.35	16.03	7.94	27	24.11	18.9	21.83	25.66	28.23	23.33	24.91	7.77	0.23	10.95	0.25	20.67	17.79	15.37	2.29	2.75	2.65	19.04	16.16	15.52	20.44	46.32	98.56	99.22	4.49	3.78	4.26	21.38	22.46	25.05	1.4	1.64	1.27	25.5	4.02	29.66	6.65
YDR163W	20.51	10.6	18.2	7.35	26.71	22.94	17.95	20.59	30.37	27.62	26.1	25.38	10.82	0.38	15.25	0.31	26.29	17.77	13.49	1.49	1.96	1.96	26.33	22.59	17.11	26.81	48.56	114.08	108.26	2.42	2.81	2.66	29.15	30.04	38.88	0.87	1.17	0.9	41.42	2.05	45.7	6.04
YDR164C	10.7	5.43	13.71	5.34	34.11	25.77	26.65	23.53	28.96	29.54	21.88	27.09	6.27	0.14	5.22	0.15	18.78	18.11	21.82	1.18	1.54	1.01	15.2	11.04	11.92	11.38	41.84	89.48	90.33	2.85	2.47	2.47	11.4	12.35	14.74	0.43	1	0.64	15.89	3.96	16.67	2.81
YDR165W	22.72	11.37	20.32	9.6	57.13	49.4	44.16	45.28	51.39	58.07	46.33	61.63	7.61	1.11	11.94	1.3	34.37	30.97	25.64	5.29	5.55	5.95	28.87	21.2	23.19	28.88	44.94	88.52	88.86	3.43	2.92	2.77	16.49	17.76	18.61	1.3	1.84	1.16	16.92	0.84	16.32	1.89
YDR166C	15.7	11.03	18.04	10.4	38.11	29.22	31.31	26.61	30.24	34.41	23.89	34.25	9.58	1.11	8.17	0.58	23.8	25.29	25.81	4.58	5.18	4.38	18.33	14.56	14.05	14.76	62.52	149.13	156.85	6.45	6.66	5.86	18.27	19.57	25.98	1.57	2.69	1.78	25.37	5.8	26.79	9.31
YDR167W	14.03	7.88	12.85	6.06	17.46	13.23	10.15	13.41	19.78	18.88	16.35	14.77	6.32	0.28	7.64	0.34	15.87	9.86	11.31	1.96	1.79	1.77	16.48	13.85	14.24	17.76	31.95	58.29	61.34	1.62	1.76	1.68	14.06	15.71	19.97	0.7	1.14	0.79	17.68	3.09	18.03	4.33
YDR168W	31.83	19.77	31.86	16.78	52.28	45.95	44.8	38.64	44	48.13	37.01	46.06	18.27	2.76	20.61	1.82	38.18	36.81	35	7.25	7.44	7.59	44.33	37.77	30.79	43.16	121.31	228.81	250.2	8.77	8.34	7.45	34.89	40.48	46.7	2.32	3.84	2.35	50.73	12.29	52.23	12.42
YDR169C	30.23	27.38	36.65	21.75	130.79	110.69	114.99	104.44	109.32	125.53	91.06	110.03	22.34	10.7	22.25	5.96	100.6	99.38	98.82	41.01	37.27	44.27	46.03	43.83	38.12	48.77	155.88	396.67	459.36	12.31	11.31	11.74	62.19	63.43	75.97	3.47	9.13	3.98	71.92	19.78	79.37	44.71
YDR170C	47.17	33.9	61.33	29.99	176.73	129.58	148.65	122.05	139.04	158.4	115.93	145.63	44.7	6.73	27.43	2.74	100.96	104.66	111.77	17.35	16.66	18.32	69.23	57.2	57.93	63	283.68	479.56	515.66	27.87	28.55	29.02	68.5	74.53	87.67	10.71	15.6	12.72	89.14	47.15	91.4	30.19
YDR171W	139.89	145	151.57	95.91	13.51	12.78	13.51	14.28	15.37	17.55	8.14	6.71	67.94	95.5	59.03	32.74	88.83	65.85	49.9	68.53	52.79	50.05	232.65	285.74	68.22	116.52	127.4	237.49	352.29	2.94	3.53	2.85	142.87	208.37	153.41	1.72	5.17	1.27	101.9	73.76	131.28	149.56
YDR172W	65.88	40.33	66.49	36.02	131.27	110.29	115.63	104.79	131.38	141.11	113.72	137.86	40.05	10.2	37.9	5.94	86.73	80.09	74.49	20.75	23.17	22.22	86.23	85.1	62.66	83.18	212.05	402.22	352.01	20.29	18.72	17.32	67.8	78.07	87.67	9.49	11.17	9.46	80.26	19.36	85.85	22.67
YDR173C	2.63	3.76	3.91	2.98	4.5	3.38	2.84	3.4	4.23	3.97	3.26	3.27	3.3	2.59	2.1	0.84	3.11	2.5	2.89	1.9	2.06	2.07	3.65	3.95	2.51	3.62	6.16	15.03	15.2	3.68	3.42	3.09	3.26	3.4	3.81	1.12	1.64	1.16	5.45	3.46	6.18	2.55
YDR174W	14.41	11.9	14.45	11.02	24.92	21.99	22.61	22.75	28.93	27.7	23.62	26.21	9.23	6.36	9.14	3.91	22.63	18.52	17.06	12.88	14.24	16.07	18.24	18.24	13.24	17.4	47.29	72.28	74.09	2.93	2.75	2.36	11.13	11.1	14.18	1	0.96	1.15	17.78	19	17.96	13.12
YDR175C	12.94	8.69	13.7	8.26	17.67	17.79	16.87	14.92	19.35	19.6	17	16.44	6.51	1.31	7.11	0.78	16.93	12.36	14.24	3.34	3.45	3.93	14.65	16.05	10.74	15.83	33.82	66.97	72.19	4.26	3.82	3.4	13.1	12.78	17.34	1.12	1.38	1.29	16.27	4.95	17.78	6.03
YDR176W	32.86	20.54	33.91	17.36	74.04	65.91	69.24	61.37	67.44	72.02	57.11	66.1	18.87	2.98	20.79	1.71	50.21	51.85	51.92	8.41	8.37	8.61	33.42	32.1	25.31	29.99	115	267.4	272.6	6.1	5.73	6	48.52	47.79	61.16	2.09	3.5	2.12	58.43	12.61	63.53	14.55
YDR177W	10.84	7.86	11.89	6.59	13.64	9.73	9.1	9.83	20.06	15.37	13.18	12.59	9.93	1.9	5.51	0.78	10.4	7.54	9.06	2.11	2.17	2.52	12.68	11.68	11.95	14.26	37.89	59.57	61.41	4.32	4.81	4.46	13.12	13.57	16.36	1.96	3.24	2.06	22.64	3.07	23.28	3.81
YDR178W	6.78	7.95	6.27	5.18	25.26	25.89	21.69	24.11	20.67	28.39	23.13	26.48	5.92	6.47	4.92	2.75	32.43	28.61	19.97	26.84	21.72	27.14	7.05	9.35	4.38	8.66	13.62	22.91	29.34	0.75	0.74	0.7	3.76	3.65	4.5	0.14	0.16	0.12	6.96	1.06	8.52	2.59
YDR179C	2.59	1.02	1.52	0.76	1.26	1.43	1.19	1.81	1.46	1.31	1.14	1.2	1.34	0.1	1.45	0.12	1.21	0.59	0.94	0.11	0.14	0.04	2.47	1.92	2.35	3.06	8.92	16.4	16.53	0.33	0.33	0.37	3.76	3.79	4.86	0.11	0.23	0.21	4.67	0.19	4.97	0.32
YDR179W-A	2.61	1.75	2.64	1.65	6.87	5.63	4.96	4.41	5.57	6.29	4.64	6.09	1.66	0.85	1.67	0.54	3.72	3.7	2.86	0.97	1.37	1.04	3.79	2.79	3.26	4.35	8.29	22.03	16.74	0.49	0.52	0.46	2.74	3.05	3.6	0.1	0.23	0.1	4.21	0.56	4.97	1.03
YDR180W	7.9	5.04	8.49	5.07	21.81	18.74	19.83	17.54	15.02	17.15	12.67	15.57	4.73	1.08	4.26	0.59	12.68	12.36	13.47	1.64	2.35	2.05	8.5	8.46	7.9	9.34	30.42	64.24	71.07	2.68	2.6	2.16	8.57	7.75	10.94	0.42	0.86	0.5	11.5	2.97	11.48	4.17
YDR181C	11.82	6.95	12.55	5.72	22.39	17.64	17.8	17.52	21.55	19.55	17.04	19.4	4.94	0.55	6.58	0.61	15.29	12.41	14.5	2.03	2.28	2.29	17.08	16.09	13.46	17.09	38.71	86.34	99.43	3.06	3.15	2.67	13.27	14.56	18.35	0.81	1.29	0.94	18.89	4.18	19.85	5.68
YDR182W	17.55	13.78	19.39	11.4	31.84	24.71	25.31	23.63	28.86	31.64	24.87	26.4	11.25	1.47	10.87	1.8	22.59	20.72	19.9	5.68	5.62	6.6	21.5	18.06	16.1	21.36	61.59	123.01	135.01	5.68	6.19	5.05	20.97	22.66	25.82	1.77	2.46	1.84	26.42	6.66	29.53	9.66
YDR182W-A	0.06	0.12	0.04	0.06	0.24	0.08	0.09	0.05	0.2	0.21	0.11	0.21	0.1	0.05	0.06	0.01	0.15	0.09	0.12	0.02	0.03	0.06	0.06	0.14	0.08	0.16	0.49	0.4	0.49	0.31	0.34	0.3	0.12	0.04	0.02	0.09	0.07	0.08	0.13	0.26	0.1	0.05
YDR183W	3.73	1.17	3.78	1.14	4.69	4.18	4.26	3.77	4.91	5.35	4.17	4.15	1.7	0.04	1.99	0.04	3.68	2.45	2.84	0.23	0.25	0.13	3.84	2.42	2.48	2.81	9.18	19.62	19.47	0.49	0.82	0.57	3.64	3.37	4.8	0.12	0.2	0.26	5.94	0.33	6.61	0.41
YDR184C	20.58	10.22	17.57	9.65	56.34	48.28	41.52	38.89	49.02	55.24	44.24	54.39	4.75	1.02	9.91	1.14	31.33	30.79	26.02	3.49	4.85	3.97	31.3	27.83	27.44	38.45	30.68	61.9	65.05	2.62	2.12	1.97	10.69	12.28	12.88	0.62	0.99	0.69	9.88	0.59	11.12	1.35
YDR185C	0.89	0.62	0.89	0.6	1.08	1.3	0.99	1.17	1.66	2.02	1.61	1.57	0.65	0.13	1.09	0.08	1.04	0.73	0.8	0.05	0.14	0.04	1.65	1.83	1.24	1.93	1.23	2.41	2.03	0.67	0.6	0.48	0.59	0.33	0.81	0.18	0.15	0.3	0.94	0.11	1.46	0.22
YDR186C	48.33	52.44	62.1	46.6	162.66	130.6	141.98	128.39	161.14	169.27	123.25	148.13	37.66	43.28	31.89	19.44	101.76	95.98	98.98	68.61	73.23	79.26	69.75	66.49	68.46	77.31	203.28	527.96	533.16	14.46	14.13	13	74.1	73.15	96.73	2.17	3.7	2.4	108.46	84.15	120.79	116.32
YDR188W	32.42	17.86	31.54	15.6	48.72	38.32	41.17	39.54	52.49	50.93	40	42.49	23.45	7.76	19.24	2.87	35.32	34.31	39.18	10.55	9.1	10.29	41.52	40.21	29.89	40.19	121.65	221.49	238.64	6.7	6.18	5.93	42.56	44.46	50.49	1.77	3.53	1.7	54.62	36.53	62.32	26.48
YDR189W	25.12	16.54	25.45	14.3	63.74	53.76	53.73	48.05	52.72	59.02	46	53.3	18.28	2.43	16.36	1.33	44.68	42.44	35.99	7.69	8.28	7.66	29.55	25.93	21.92	25.92	96.6	196.65	210.21	6.45	5.23	5.89	30.19	32.83	37.61	2.51	3.68	2.04	34.11	5.37	39.88	9.68
YDR190C	32.93	22.14	35.86	20.04	62.31	47.13	49.69	42.93	66.23	62.38	50.39	61.23	18.93	3.71	17.03	1.97	40.51	36.49	33.13	8.67	8.82	10.16	43.22	36.7	31.91	42.22	99.25	203.4	196.14	8.45	8.45	7.48	32.97	36.41	37.75	3.82	5.96	3.81	40.72	7.46	38.64	9.11
YDR191W	2.94	1.35	2.81	1.49	5.56	5.1	4.35	4.82	5.85	5.73	4.17	4.95	0.96	0.23	1.26	0.09	3.79	3.7	3.64	0.67	0.96	0.6	3.33	2.81	2.93	2.78	9.67	20.1	22.97	1.04	0.73	0.87	2.41	1.93	3.1	0.25	0.22	0.25	4.32	0.78	4.46	0.87
YDR192C	6.09	3.29	6.73	2.89	20.33	16.13	15.34	13.55	21.07	18.38	14.63	14.74	3.79	0.16	3.58	0.14	11.68	10.63	11.33	0.62	0.9	0.95	7.04	6.01	6.39	6.76	23.4	49.68	46.43	1.74	1.46	1.69	7.95	9.58	10.98	0.33	0.73	0.46	11.47	1.19	10.95	1.81
YDR194C	42.37	39.51	46.14	33.15	93.68	77.87	86.05	73.91	92.54	96.05	73.75	92.12	24.59	19.85	24.86	9.51	71.14	70.51	73.11	34.27	37.61	39.22	57.44	49.8	45.69	58.58	140.01	318.69	351.59	16.47	15.9	15.27	42.15	45.75	56.2	4.12	6.73	4.49	56.54	17.27	58.24	16.56
YDR195W	6.68	8.82	6.84	5.85	17.54	14.26	15.48	12.15	23.49	21.23	16.31	19	4.58	5.62	4.24	2.44	11.27	10.18	12.01	7.3	6.87	7.38	7.6	6.95	6.8	8.96	16.16	38.27	41.24	7.76	7.15	7.84	8.06	6.47	8.4	4.15	5.87	5.03	12.85	6.54	15.59	7.41
YDR196C	6.59	3.38	8.1	3	7.51	6.2	6.18	5.81	6.7	6.74	5.55	4.66	4.03	0.32	4.26	0.15	6.42	4.89	5	0.76	0.79	0.82	7.74	10.18	5.96	8.04	16.95	29.67	34.17	0.98	1.03	0.85	4.93	6.28	7.82	0.37	0.35	0.29	9.34	1.8	10.47	1.94
YDR197W	8.82	6.69	10.76	5.47	21.94	19.11	17.6	18.94	20.39	23.41	17.31	20.78	5.73	0.83	5.64	0.53	17.52	16.93	15.81	3.23	3.61	3.86	11.42	12.55	9.01	11.62	24.45	57.32	63.79	3.18	3.11	2.24	9.67	10.72	12.96	0.47	1.03	0.58	13.95	5.08	15.61	5.97
YDR198C	6.1	3.11	7.06	2.89	15.38	11.96	12.47	10.63	14.04	15.34	11.93	15.25	2.25	0.15	3.16	0.08	7.74	8.13	7.53	0.54	0.59	0.67	7.79	6.93	7.34	7.89	15.83	33.36	35.57	1.59	1.91	1.57	5.32	5.87	6.64	0.3	0.65	0.46	7.02	1.75	6.68	1.82
YDR200C	13.85	8.3	16.17	6.81	33.16	26.87	29.08	26.77	31.55	33.75	28.58	29.56	11.91	0.68	9.91	0.39	24.44	20.84	23.56	2.19	2.44	2.91	20.13	19.64	16.49	20.62	70.02	174.3	183.74	4.86	4.5	4.49	24.73	23.99	31.29	0.65	2.12	0.91	36.7	3.48	38.39	7.62
YDR201W	5.47	2.72	5.75	2.45	3.58	4.38	3.22	3.58	5.07	4.34	4.06	4.39	2.59	0.09	3.19	0.15	5.72	3.66	3.35	0.49	0.49	0.54	5.94	5.85	4.26	5.91	13.21	22.35	22.55	0.44	0.36	0.37	4.84	5.17	6.04	0.14	0.24	0.09	6.83	0.99	7.52	1.29
YDR202C	4.37	2.03	4.47	2.13	7.51	7.2	6.64	5.97	6.35	7.86	5.93	5.53	3.32	1.12	2.99	0.49	6.27	4.73	4.79	1.35	1.72	1.83	6.17	6.01	4.23	4.59	14.45	29.34	33.05	0.62	0.54	0.5	4.57	5.1	6.02	0.06	0.19	0.06	8.5	0.61	8.4	1.33
YDR204W	2.4	1.58	3.29	1.3	5.11	3.28	3.97	3.33	4.56	4.18	3.79	3.67	3.05	0.78	1.72	0.27	4.34	3.29	3.68	1.1	0.93	1.08	4.19	3.96	2.98	2.56	14.52	25	26.26	0.73	0.64	0.42	4.72	4.84	5.47	0.11	0.14	0.16	7.75	1.36	7.97	1.65
YDR205W	7.18	5.6	7.29	4.75	32.26	28.07	25.4	25.9	24.37	30.68	24.18	30.41	3.48	0.36	4.47	0.28	22.8	24.24	21.49	2.61	3.75	3.37	6.81	5.33	5.49	6.58	20.6	50.09	53.08	2.64	2.4	2.26	6.88	7.12	8.12	0.64	1.16	0.63	8.69	2.42	10.62	2.71
YDR206W	16.89	12.79	21.07	11.24	42.27	31.12	36.91	29.02	41.48	41.1	30.41	38.5	9.03	1.04	8.45	0.63	25.31	24.81	27.45	3.94	4.45	4.57	19.09	13.79	17.41	16.65	48.38	104.27	110.36	7.09	6.68	6.45	17.88	17.64	20.23	3.25	4.25	3.4	18.19	4.67	20	5
YDR207C	22.84	18.29	25.49	14.98	83.96	69.67	66.95	63.46	75.83	79.77	63.82	66.42	16.92	2.94	14.12	1.09	64.44	63.42	59.83	9.75	10.41	11.24	20.58	20.46	17	19.55	83.57	212.49	216.72	2.82	2.72	2.18	38.5	40.44	47.76	0.45	1.53	0.46	35.24	9.3	39.09	13.31
YDR208W	47.17	32.85	48.42	27.69	163.56	135.85	140.3	131.1	132.59	146.04	113.21	135.86	26.52	10.26	31.9	5.22	103.83	100.07	99.57	26.63	28.02	31.99	68.67	68.27	53.26	71.36	151.17	375.05	401.31	12.57	11.12	12.44	60.22	57.35	71.01	4.25	6.56	3.87	74.48	19.15	82.1	32.78
YDR210W	5.36	4.52	5.84	5.09	5.48	5.75	4.41	3.74	5.02	6.79	4.84	6.17	3.55	3.71	3.64	1.74	6.7	4.95	4.39	4.24	4.1	4.75	8.35	8.44	4.43	7.21	12.99	24.6	23.11	0.76	0.39	0.62	5.17	5.45	6.2	0.14	0.2	0.15	7.04	0.65	8.15	2.11
YDR211W	13.26	10.06	15.83	8.74	31.03	22.51	25.95	21.01	29.59	27.25	20.26	24.11	8.51	2.76	5.06	1.31	17.78	17.72	22.08	5.03	5.82	5.5	16.73	13.28	16.51	17.96	56.03	99.13	97.61	5.43	5.52	4.82	15.72	16.2	18.67	1.59	2.2	1.59	17.49	8.42	16.47	6.31
YDR212W	10.25	5.47	11.51	5.25	19.57	16.81	16.58	14.88	20.01	18.91	13.92	19.24	7.82	0.58	5.37	0.34	13.31	13.41	12.5	1.98	2.07	2.07	12.82	10.88	9.78	11.59	53.19	86.59	87.53	3.5	3.73	3.02	11.97	12.84	17.26	1.13	1.72	1.2	16.35	4	15.36	3.62
YDR213W	9.13	6.3	10.38	5.52	39.82	30.69	30.91	27.14	45.11	46.48	35.8	45.05	8.92	3.92	5.53	0.99	26.05	23.09	25.55	11.37	10.61	12.68	10.33	7.89	8.68	8.09	36.58	89	100.13	3.61	3.04	3.46	18.78	18.01	23.82	1.38	1.52	1.32	19.32	4.48	21.39	4.82
YDR214W	47.86	55.97	47.91	37.69	24.26	17.06	18.27	15.27	21.07	18.59	14.79	15.22	20.43	21.26	19.54	9.69	38.01	32.67	30.31	19.39	16.86	16.59	62.82	58.53	32.3	44.04	65.47	110.54	136.48	2.56	2.61	2.23	39.26	39.77	43.93	1.43	3.25	1.02	35.24	30.57	47.85	34.98
YDR216W	14.58	19.15	14.64	11.24	25.18	21.91	25.49	20.11	17.54	21.1	16.51	21.39	8.37	7.42	8.04	4.14	27.73	28.88	32.85	14.25	12.78	18.08	9.72	10.97	5.44	9.85	121.87	230.65	275.54	4.3	4.12	3.58	23.95	20.29	27	0.47	0.93	0.46	54.76	38.75	57.38	49.07
YDR217C	18.64	9.47	21.36	9.2	62.39	44.58	51.67	39.72	49.82	49.7	37.1	45.16	11.69	0.33	9.08	0.22	30.65	32.61	33.85	1.62	1.86	2.05	20.16	13.01	19.19	18.31	97.68	234.75	237.17	6.45	6.67	6.86	25.73	31.29	36.43	1.44	2.16	1.7	37.81	3.14	37.56	4.22
YDR219C	7.91	5.58	9.57	4.88	19.91	15.51	16.56	16.14	18.65	16.83	13.72	13.89	5.1	0.94	4.63	0.4	12.5	11.13	15.48	2.77	3.25	4.08	11.52	11	10.08	11.14	37.48	82.57	99.78	3.25	3.73	2.82	10.95	11.77	15.64	1.34	2.41	1.3	15.6	3.16	15.81	4.85
YDR221W	16.57	9.87	17.91	8.62	38.82	28.07	32.7	28.33	34.8	33.67	24.76	29.64	10.14	0.47	9.68	0.24	26.24	25.83	29.61	1.62	2.04	2.05	14.09	10.01	11.11	12.53	59.69	134.26	159.16	2.62	2.36	2.11	22.61	25.18	27.85	0.69	0.99	0.57	27.04	1.67	28.88	1.48
YDR222W	5.93	4.82	7.31	5.88	19.25	15.48	18.96	15.77	10	10.39	9.03	10.75	8.83	9.96	3.7	2.21	11.57	10.57	10.37	9.74	9.06	8.72	9.38	10.24	5.04	8.25	6.68	13.91	13.37	0.47	0.41	0.42	2.31	3.03	2	0.09	0.22	0.09	2.21	5.3	2.72	6.36
YDR223W	0.57	0.5	0.54	0.48	1.9	1.45	0.96	1.1	2.12	1.76	1.05	1.52	0.24	0.23	0.37	0.15	1.59	1.14	1.62	0.73	0.61	0.99	0.47	0.32	0.43	0.55	1.16	3.46	2.8	0.45	0.49	0.44	0.71	1.37	1.13	0.09	0.1	0.16	0.38	0.17	0.45	0.49
YDR224C	23.73	18.6	22.71	18.24	36.53	32.47	31.37	33.08	34.05	35.56	34.04	34.86	19.39	15.17	16.13	7.59	30.82	20.24	18.11	18.79	22.13	21.42	33.85	36.05	19.07	30.6	71.97	120.75	110.99	1.39	1.4	1.02	20.68	25.38	28.74	3.94	5.65	4.48	35	5.69	38.39	13.44
YDR225W	13.54	12.74	14.66	12.32	16.25	17.21	17.16	15.77	16.18	18.25	16.73	16.66	14.48	14.33	9.37	6.05	10.72	9.32	7.77	9.82	10.13	10.2	21.39	22.8	13.12	22.19	62.15	105.4	98.59	1.24	1.07	0.87	18	23.27	27.14	2.86	3.82	3.61	33.92	16.7	37.48	16.29
YDR226W	12.88	11.68	13.32	11.83	12.59	12.03	11.45	11.89	14.42	13.18	10.66	12.35	10.99	9.81	7.3	4.41	12.36	11	9.92	9.7	10.34	9.86	15.73	14.93	12.05	15.17	74.06	76.3	89.98	3.94	3.87	3.7	17.44	19.92	21.12	1.32	1.55	1.66	25.88	5.62	27.42	10.03
YDR227W	33.81	19.78	33.72	16.12	105.9	87.88	89.16	78.52	82.74	90.13	72.59	90.68	13.36	1	18.85	1.17	67.61	70.14	72.21	7.79	7.82	8.28	41.57	35.41	36.74	41.67	119.71	273.51	289.41	9.29	9.29	9.26	44.24	48.45	53.3	2.64	5.8	3.18	47.04	4.05	47.16	6.28
YDR228C	13.24	11.45	14.1	9.48	37.64	33.67	29.02	28.68	41.46	45.23	32.79	38.08	9.35	4.04	7.75	1.94	21.06	22.31	22.12	8.44	8.75	9.17	13.5	13.7	12.19	15.98	40.05	106.2	106.72	13.84	13.74	13.69	15.96	14.36	19.6	5.53	6.92	6.65	24.37	7.25	27.19	14.17
YDR229W	24.56	13.92	26.71	12.89	49.49	41.2	38.53	39.81	45.24	43.58	36.34	38.66	14.02	0.99	16.47	0.83	37.77	32.33	33.6	4.3	4.63	4.4	33.76	34.46	25.16	30.59	73.79	172.77	180.59	5.37	5.32	4.33	32.63	36.86	42.51	1.16	1.69	1.25	45.28	6.47	50.59	8.9
YDR231C	5.04	3.3	5.57	2.94	6.16	5.5	5.36	5.01	6.3	6.37	4.97	5.3	4.12	1.31	2.83	0.52	7.97	4.73	5.51	2.37	2.28	3.17	7.47	7.13	5.27	7.73	14.3	30.39	31.09	0.67	0.78	0.52	7.07	7.51	9.68	0.09	0.2	0.06	11.23	1.78	14.6	2.46
YDR232W	22.43	20.47	24.07	17.9	74.75	67.54	65.55	55.01	68.67	81.5	60.23	72.91	17.42	14.89	12.07	6.18	51.3	53.69	48.66	35.49	31.51	36.83	32.57	26.73	23.89	28.47	72.67	134.18	148.17	2.78	3.01	2.5	22.89	21.38	25.46	0.67	0.88	0.51	25.12	13.37	29.03	15.44
YDR233C	27.79	26.06	28.33	21.73	87.15	73.74	73.82	72.78	100.58	102.44	79.79	95.05	21.5	22.29	19.4	9.83	55.25	52.87	50.96	35.88	34.99	37.41	41.89	39.33	26.25	34.24	96.94	123.73	122.61	4.9	5.35	4.39	29.34	30.27	32.49	2.83	4.15	2.89	47.12	15.62	50.24	42.22
YDR234W	9.19	3.73	9.59	3.36	38.58	30.42	28.15	26.59	38.66	38.83	30.54	36.45	4.22	0.49	5.14	0.46	17.63	14.84	15.06	1.54	1.99	2.2	12.82	10.06	12.47	14.7	35.39	70.67	70.02	2.3	2.12	1.94	8.02	9.29	9.96	0.9	1.02	0.88	12.74	1.51	12.94	0.79
YDR235W	6.25	3.66	7.27	3.5	12.62	12.31	12.61	10.97	13.43	14.06	10.89	13.22	2.89	0.53	3.55	0.31	10.04	9.04	8.33	1.82	1.96	2.18	7.99	7.91	6.37	8.4	17.02	36.82	40.33	1.63	1.46	1.32	7.36	6.94	8.77	0.38	0.62	0.37	8.28	1.52	9.48	2.65
YDR236C	2.93	1.54	2.81	1.19	3.45	3.28	2.7	2.85	3.98	3.38	2.54	2.31	1.47	0.04	1.44	0.05	3.02	2.68	2.74	0.34	0.21	0.41	2.27	1.92	2.28	1.84	9.41	16.32	12.46	0.8	0.99	1.04	2.29	2.47	3.97	0.48	0.18	0.5	4.34	1.02	3.71	0.92
YDR237W	5.04	2.85	5.8	2.42	9.19	8.08	7.89	7.85	9.65	10.04	7.99	8.59	3.57	0.18	2.3	0.07	8.02	5.79	6.59	0.96	0.87	0.82	5.49	4.94	4.95	5.22	20.31	41.56	40.54	1.08	0.78	1.06	7.89	7.66	8.53	0.16	0.35	0.22	9.66	1.52	9.03	2.06
YDR238C	27.55	21.78	34.25	20.58	78.75	56.18	73.7	59.19	71.14	70.8	50.06	60.85	24.47	6.19	14.98	2.43	50.85	51.49	56.64	12.12	14.37	12.75	37.21	31.48	33.39	37.05	160.99	271.9	294.87	17.72	16.8	17.21	38.19	41.74	48.4	6.85	8.12	7.32	50.92	22.61	53.67	18.66
YDR239C	12.41	7.39	11.58	6.3	38.58	35.55	29.08	26.31	35.99	37.29	30.27	38.1	6.32	0.37	7.46	0.39	23.67	24.29	21.07	1.77	2.24	2.78	12.81	11.27	11.47	11.81	31.76	76.7	82	3.06	2.75	2.86	13.83	14.54	16.65	0.38	1.27	0.62	17.16	1.82	18.82	2.95
YDR240C	6.62	4.15	7.83	3.37	15.41	15.08	15.95	13.48	17.82	19.55	14.25	17	3.07	0.18	3.74	0.36	10.95	10.2	9.01	0.91	1.16	1.16	8.27	6.83	7.8	9.63	22.36	52.58	53.85	1.99	1.84	1.97	7.16	7.14	9.68	0.23	0.33	0.17	9.31	0.73	9.63	1.95
YDR242W	2.4	1.4	3.04	1.01	9.64	8.96	8	8.36	8.34	10.89	7.81	9.87	1.29	0.5	1.57	0.34	5.57	5.57	4.9	1.31	1.28	2.22	2.83	3.48	1.97	2.84	13.44	27.98	32.28	0.8	0.58	0.65	2.92	3.72	4.68	0.05	0.14	0.05	4.97	0.63	5.07	1.11
YDR243C	4.47	2.8	5.02	2.32	11.46	8.58	8.7	7.69	11.72	10.39	7.92	9.07	1.98	0.26	2.29	0.21	6.64	6.48	6.8	0.44	0.65	0.63	5.13	3.32	3.95	4.72	19.67	41.81	42.71	1.3	1.28	0.97	6.29	6.09	7.68	0.21	0.31	0.16	6.42	1.54	6.03	1.13
YDR244W	14.15	11.2	15.83	8.95	24.7	22.04	22.88	19.47	27.49	27.86	21.91	27.97	7.58	3.93	9.06	3.25	19.63	18.97	19.29	7.22	6.96	7.9	18.67	18.41	16.09	18.4	55.65	134.58	139.91	6.98	6.67	6.32	20.31	19.61	25.03	1.12	1.98	1.12	27.88	8.96	27.11	9.33
YDR245W	14.28	11.61	16.06	10.02	21.41	16.66	20.41	14.35	24.42	22.67	17.87	18.81	9.29	3.84	7.53	2.32	14.76	12.7	13.42	5.11	5.27	5.87	21.84	20.65	19.43	24.49	45.8	99.69	96.21	3.92	3.81	3.69	18.36	21.55	24.71	1.32	2.11	1.4	22.83	9.04	23.71	8.54
YDR246W	15.28	8.2	14.98	6.2	28.15	24.01	20.24	21.7	32.66	30.07	26.01	25.52	8	0.73	9.48	0.41	23.76	20.06	16.77	2.87	2.76	2.96	23.14	23.34	14.19	20.33	45.09	89.64	94.11	3.03	2.79	3.02	25.68	26.5	32.4	1.12	1.55	0.94	30.95	2.71	33.49	6.54
YDR246W-A	0.95	0.86	0.88	0.53	2.95	2.78	2.15	2.18	3.25	3.97	2.81	3.03	0.38	0.15	0.55	0.14	2.81	2.73	2.25	1.12	0.75	0.91	1.53	1.58	0.87	1.5	1.9	3.94	5.67	0.57	0.52	0.39	0.75	0.6	0.75	0.22	0.36	0.22	1.11	0.67	1.13	1.21
YDR247W	3.68	4.12	4.55	3.6	24.41	20.14	24.12	21.15	18.4	21.79	15.3	19.45	4.09	4.88	2.76	1.67	18.52	19.7	22.19	21.6	17.69	23.9	5.14	6.15	3.73	4.68	18.07	35.37	42.43	1	1.08	0.7	4.5	4.02	6.06	0.35	0.46	0.43	7.39	7.1	8.3	10.99
YDR248C	3.49	2.24	5.67	3.5	5.85	4.38	3.71	3.7	3.45	3.94	3.35	3.17	1.45	0.72	1.72	0.49	4.96	3.41	3.64	2.13	1.32	2.05	5.78	4.67	2.97	3.8	30.2	44.46	54.9	1.06	0.88	0.76	5.93	7.91	8.67	0.15	0.37	0.14	11.09	1.38	13.54	1.9
YDR249C	1.03	0.93	1.21	0.65	2.55	1.83	1.62	1.61	2.02	2.74	2.28	2.82	0.45	0.14	0.64	0.23	1.57	1.34	1.27	0.5	0.75	0.97	1.37	1.71	1.45	1.87	2.43	5.55	5.11	0.29	0.28	0.42	0.97	0.68	0.87	0.11	0.13	0.05	0.89	0.24	1.01	0.57
YDR251W	19.79	12.31	26.92	10.71	62.16	48.15	51.64	47.27	55.95	56.52	42.41	45.9	17.64	2.56	11.13	1.44	43.58	43.06	46.83	9.8	8.21	10.1	33.31	33.15	23.79	27.88	94.03	202.68	235.35	5.81	5.41	5.29	29.05	29.74	36.07	0.92	1.92	1.07	43.2	15.79	47.27	22.31
YDR252W	1.12	0.58	1.09	0.6	0.97	1.3	1.22	1.13	1.81	1.44	1.27	1.09	0.65	0.03	0.53	0.05	0.81	0.77	0.94	0.13	0.13	0.13	0.88	0.98	0.68	1.02	5.86	12.46	11.62	0.23	0.27	0.14	1.58	1.56	2	0.03	0.09	0.02	2.29	0.46	2.14	0.71
YDR253C	10.54	9.68	7.81	5.83	3.98	3.55	2.44	3.17	4.41	2.88	2.57	2.24	1.04	0.53	5.8	2.89	6.25	3.77	4.5	3.99	3.48	4.29	20.1	16.37	18.32	19.3	0.97	2.97	2.03	0.1	0.32	0.23	5.86	2.44	1.74	0.05	0.1	0.04	1.24	0.32	1.01	0.14
YDR254W	5.92	4.39	6.14	3.41	6.85	6.55	5.62	5.42	7.18	6.37	5.87	5.88	2.99	0.43	3.05	0.52	5.08	4.59	6.29	1.17	0.99	1.16	6.23	6.1	4.81	5.85	16.35	32.24	33.89	0.57	0.91	0.67	6.25	5.65	8.02	0.2	0.67	0.19	7.61	0.93	8.3	1.38
YDR255C	7.78	4.74	9.82	4.54	23.65	22.64	22.82	20.82	18.7	23.41	16.22	18.12	6.84	0.53	5.93	0.35	20.46	20.04	17.57	2.73	2.63	2.61	12.95	14.24	9.08	14.01	35.2	82.65	88.09	2.56	2.41	1.81	13.31	13.19	16.42	0.39	0.83	0.46	19.03	3.14	21.16	6.44
YDR256C	0.88	1.71	1.03	0.74	2	1.08	1.71	1.08	2.52	2.37	1.38	1.84	0.35	0.26	0.89	0.59	2.23	2.09	1.95	2.6	1.62	2.16	1.01	1.07	1.05	1.39	1.68	2.49	2.94	1.31	1.35	1.4	0.78	0.26	0.69	0.57	0.34	0.47	1.21	5.69	0.81	4.73
YDR257C	5.31	3.41	6.41	3.1	13.25	10.91	12.15	10.68	14.87	15.13	11.18	13.33	3.26	0.87	3.41	0.54	7.25	6.86	8.42	1.25	1.87	1.53	9.14	9.06	7.52	9.78	19.71	45.58	40.47	2.2	1.89	1.96	6.29	6.02	8.28	0.47	0.79	0.45	7.31	3.59	7.67	2.54
YDR258C	34.13	28.43	42.75	20.46	19.31	13.66	16.7	15.02	9.15	11.61	7.45	7.48	21.19	19.98	16.82	7.45	33.52	29.79	34.56	16.19	13.1	15.06	69.81	68.86	32.1	40.99	87.23	170.92	232.55	4.23	4.58	4.11	66.68	74.69	87.63	0.92	3.05	1.07	57.7	33.8	74.38	29.72
YDR259C	2.9	2.55	3.55	2.51	13.56	13.71	13.25	11.3	12.42	13.56	8.25	9.63	1.72	1.13	1.24	0.71	10.49	9.36	9.13	5.47	5.27	5.78	4.6	4.98	3.31	3.83	14.26	30.55	34.1	3.29	2.68	2.14	3.48	3.16	4.41	0.12	0.09	0.11	9.74	2.53	10.59	4.95
YDR260C	11.43	6.26	10.36	5.16	17.44	17.59	12.41	13.94	21.62	22.99	18.2	18.39	4.51	0.62	6.94	0.77	13.59	9.84	8.94	2.17	2.37	2.61	13.61	13.83	11.35	13.68	39.08	79.51	90.96	1.19	1.41	1.2	13.07	14.5	18.47	0.11	0.38	0.2	26.04	4.29	28.42	3.95
YDR261C	4.64	2.92	5.64	3.38	11.43	9.76	9.8	10.01	11.14	10.79	9.35	9.82	5.2	1.95	2.96	0.77	7.46	6.61	7.16	2.64	2.73	2.8	6.27	6.49	4.14	5.97	34.3	51.69	57.98	2.36	2.02	2.13	7.14	7.37	9.7	0.57	0.99	0.65	10.36	2.7	10.95	4.63
YDR262W	14.82	13.51	14.74	11.36	35.56	30.12	31.02	30.42	32.91	39.79	32.28	34.19	8.62	6.19	11.35	3.77	31.62	24.11	21.09	15.32	15.92	17.13	17.21	18.33	11.05	15.56	29.19	63.19	70.23	3.38	3.6	3.22	14.33	15.59	18.92	1.8	2.73	1.92	21.16	9.74	22.55	10.99
YDR263C	1.54	1.75	2.01	1.45	4.06	3.85	2.84	2.69	3.07	3.3	2.41	2.79	1.55	1.52	0.88	0.42	2.98	2.09	3.24	1.18	1.58	1.42	1.67	1.71	1.38	1.48	4.03	6.27	8.19	4.75	4.43	4.34	3.23	2.26	2.59	2.06	2.43	2.26	3.62	0.8	3.76	0.78
YDR264C	17.24	11.89	18.04	11.39	44.72	30.64	37.37	29.71	40.37	40.33	28.33	35.55	11.28	5.97	9.42	2.69	24.73	24.4	26.65	8.23	10.33	9.92	23.23	17.76	15.33	21.29	89.88	169.96	180.87	10.57	9.12	8.6	37.14	37.46	46.26	3.39	5.7	3.54	52.6	16.19	57.98	10.77
YDR265W	6.36	4.36	6.67	3.44	12.64	12.11	11.34	10.06	12.83	12.57	11.02	12.08	3.12	0.51	4.01	0.41	10.72	7.41	7.18	1.46	2.1	2.24	8.08	6.65	5.71	7.53	21.46	43.98	56.16	1.48	1.41	1.49	9.52	8.94	12.41	0.91	1.23	0.95	12.68	2.42	13.37	2.7
YDR266C	26.08	20.58	28.08	18.05	85.76	71.12	68.34	64.56	75.23	81.34	66.79	83.23	14.83	5.9	16.98	3.62	56.91	61.12	51.52	15.92	16.99	19.16	35.8	30.95	25.19	30.74	81.04	179.44	202.72	13.26	12.51	12.23	31.31	30.44	34.53	4.24	5.61	4.34	32.36	9.33	35.34	13.42
YDR267C	7.8	4.78	9.31	4.12	13.09	11.06	11.08	11.27	15.65	16.03	11.15	12	4.79	0.39	4.33	0.29	8.25	7.11	8.14	0.96	1.07	0.8	12.37	10.27	10.94	13.52	26.69	57.4	55.67	2.42	2.02	2.07	11.73	12.22	13.16	0.78	0.97	0.83	11.82	3.92	12.54	1.95
YDR268W	2.7	1.17	2.77	1.25	5.14	5.05	4.78	4.66	6.4	6.13	3.93	4.71	1.48	0.12	1.37	0.07	3.94	2.95	3.89	0.41	0.49	0.47	2.57	2.13	2.26	2.35	15.23	29.02	32.07	0.83	0.9	0.88	5.01	5.38	6.78	0.16	0.25	0.26	5.32	0.91	5.85	0.68
YDR270W	33.82	36.01	38.81	33.54	42.64	31.94	37.87	31.94	38.58	35.69	29.09	32.33	12.36	8.76	21.13	12.19	33.62	28.83	36.11	21.65	20.4	24.68	25.82	24.26	19.73	25.65	239.6	437.51	535.82	22.29	14.68	17.66	93.24	93.79	141.59	3.24	6.39	3.73	144.78	40.74	163.16	37.2
YDR272W	9.51	5.93	9.99	5.2	9.9	8.15	7.94	7.94	11.11	11.51	7.87	8.89	7.46	2.48	6.12	1.29	8.59	6.52	7.2	2.45	2.58	2.7	12.53	13.19	8.13	12.14	38.63	71.63	70.93	2.29	2.37	2.29	9.42	10.63	11.62	0.45	0.57	0.34	16.6	3.4	18.24	3.98
YDR273W	1.9	1.56	1.4	1.14	4.08	3.55	3.36	2.3	4.51	5.33	3.44	3.67	1.4	1.1	0.98	0.31	2.64	2.39	2.25	1.18	1.08	1.06	1.75	1.76	1.91	2.27	4.11	7.48	9.03	2.75	2.92	2.32	1.97	1.61	2.53	0.58	0.79	0.84	2.83	1.02	2.88	1.21
YDR275W	4.93	5.62	4.67	4.33	13.04	10.31	11.68	10.79	18.83	18.67	13.41	15.51	4.5	3.98	3.48	2.19	6.7	6.41	6.76	3.29	4.23	4.47	5.83	5.97	5.61	8.31	23.4	49.2	59.73	0.76	0.59	0.53	7	6.72	9.28	0.06	0.3	0.08	16.38	9.76	19.77	18.13
YDR276C	29.85	35.22	32.79	36.93	81.51	88.83	75.99	73.13	88.43	101.06	87.58	110.91	30.18	42.76	24.52	21.37	98.51	82.21	56.54	109.56	101.19	122.58	52.88	67.74	28.06	54.13	87.79	109.42	124.01	3.51	3.31	2.9	26.14	26.57	34.92	1.11	2.11	1.3	47.6	17.44	50.95	47.9
YDR277C	24.7	41.5	25.13	22.17	106.38	85.15	97.3	92.96	60.63	91.49	59.36	66.97	11.13	13.09	11.28	6.22	70.65	55.62	80.64	70.26	60.05	89.98	26.69	35.09	18.28	38.35	69.91	168.83	174.22	12.92	12.69	11.32	5.1	2.89	6.68	0.24	0.36	0.26	84.74	66.56	81.09	110.33
YDR279W	6.45	2.68	6.17	2.52	25.65	19.79	18.93	18.78	17.39	19.42	14.97	17.67	3.18	0.18	3.78	0.06	15.53	13.47	11.59	1.23	1.46	1.14	8.84	8.53	6.98	9.21	22.06	46.39	51.12	1.22	1.16	0.92	8.53	8.49	10.23	0.1	0.38	0.12	9.42	0.32	10.01	0.59
YDR280W	46.03	39.03	46.85	30.14	85.41	79.67	70.57	65.87	82.69	97.3	78.12	97.04	18.41	5.04	28.57	4.96	62.51	59.24	41.27	15.77	18.09	18.64	56.56	51.12	54.27	63.91	97.8	256.78	260.28	11.43	11.54	10.67	54.88	57.66	71.13	6.68	7.72	6.83	67.06	14.34	75.08	16.47
YDR281C	3.92	1.86	4.06	1.44	14.91	12.11	13.54	11.92	14.79	11.85	11.6	7.53	0.75	0.38	1.5	0.36	5.34	3	3.52	2.63	2.92	3.8	0.87	0.37	1.17	1.24	19	46.47	51.12	0.31	0.29	0.29	3.77	2.95	5.06	0.09	0.08	0.07	16.16	2.05	14.78	1.86
YDR282C	4.04	1.31	3.85	1.27	8.45	6.93	6.38	7.85	7.66	8.63	5.6	6.68	1.82	0.15	2.09	0.18	4.79	4.16	5.75	0.36	0.42	0.45	2.86	2.19	2.07	2.81	18.4	42.05	40.26	25.7	23.75	25.92	3.88	3.38	5.29	1.22	0.48	1.19	9.15	1.15	9.74	2.09
YDR283C	18.94	13.83	22.83	12.06	47.43	34.1	37.78	30.93	41.81	46.93	34.49	44.7	14.76	2.52	10.51	1.19	24.92	26.63	30.12	4.45	4.68	5.09	22.59	18.43	18.75	19.67	77.15	168.91	171.21	14.23	13.39	12.78	23.13	23.18	29.18	3.54	4.74	3.34	34.6	9.37	36.47	8.3
YDR284C	3.13	1.54	3.36	1.41	5.98	5.68	4.93	4.84	7.94	6.07	5.02	4.74	2.71	0.24	1.77	0.09	5.3	5.41	5.18	0.67	0.7	0.69	3.49	3.31	3.26	3.36	19.04	31.52	35.85	1.04	0.9	0.95	4.81	4.63	6.5	0.22	0.34	0.16	9.04	0.73	9.48	1.27
YDR285W	2.15	0.96	2.38	0.79	7.51	6.8	6.12	5.67	7.91	7.86	5.82	6.84	1.43	0.16	1.37	0.08	4.4	4.7	4.32	0.32	0.52	0.35	1.8	1.49	1.89	1.78	12.43	26.13	27.17	2.22	2.13	2.16	2.94	3.19	3.36	0.64	0.52	0.81	4.72	1.65	4.72	1.73
YDR286C	1.18	0.35	0.92	0.34	0.97	0.85	0.46	0.57	1.23	0.85	0.65	0.77	0.36	0.02	0.75	0.02	0.76	0.57	0.63	0.03	0.06	0.02	0.69	0.84	0.52	0.78	3.73	4.58	4.69	0.19	0.16	0.17	0.93	1.26	1.74	0.03	0.04	0.01	1.51	0.09	1.99	0.14
YDR287W	3.15	1.72	3.6	1.41	7.32	6.4	4.87	5.6	5.85	6.5	5.87	6.15	2.09	0.1	2.19	0.05	5.81	4.5	4.86	0.44	0.46	0.73	2.96	3.25	2.44	3.18	16.05	25.16	26.89	0.93	1.06	0.92	4.64	4.56	6.52	0.09	0.15	0.12	8.23	1.02	8.78	0.82
YDR288W	6.72	3.22	7.46	3.05	10.35	8.93	8.87	7.48	10.66	11.51	9.15	10.4	3.6	0.24	3.91	0.14	6.87	6.32	6.43	0.73	0.92	0.69	7.73	7.87	6.45	7.03	16.05	39.88	43.63	1.29	1.32	1.12	6.71	7.03	9.03	0.19	0.45	0.23	9.34	2.18	9.41	1.49
YDR289C	12.97	9.45	12.35	7.92	17.7	15.83	14.47	14.92	21.45	18.86	16.06	18.6	7.57	2.88	7.53	1.51	14.08	13.02	12.83	4.45	5.34	4.66	14.03	14.15	11.5	13.78	39.68	75.73	88.72	3.28	3.29	2.86	14.17	15.47	18.04	0.64	0.93	0.62	19.19	4.33	21.79	5.71
YDR291W	10.23	6.26	12.51	5.94	27.23	19.99	23.08	20.48	22.08	24.64	18.34	21.95	6.55	1.5	5.62	0.86	16.1	16.47	16.49	2.74	3.21	3.15	14.16	12.92	12.28	15.53	46.55	100.09	110.15	1.95	2.12	1.91	12.02	12.19	15.19	0.33	0.89	0.39	15.49	7.64	17.3	7.09
YDR292C	32.17	17.16	33.43	16.67	78.75	66.89	68.22	57.88	64.84	74.66	57.04	77.09	16.91	1.33	19.43	1.04	52.23	53.83	46.43	5.58	6.94	6.75	40.22	36.31	32.27	40.84	134.49	285.81	285.42	11.67	11.92	11.24	39.67	43.25	50.65	3.72	4.76	3.65	52.06	4.8	55.39	9.76
YDR293C	46.03	39.77	64.26	37.92	155.6	119.25	138.3	113.01	139.04	154.22	107.46	124.85	50.43	32.43	28.06	8.75	111.42	114.65	124.09	48.34	45.23	54.36	69.55	73.71	52.92	65.23	278.94	612.94	691.56	29.87	26.74	25.75	76.48	78.55	96.34	8.53	11.54	9.82	118.98	62.3	119.47	70.92
YDR294C	8.92	7.27	12.33	6.96	23.7	19.76	21.34	17.04	24.95	24.11	17.78	20.33	9.11	4.88	5.24	1.52	16.38	16.06	16.66	6.88	5.31	6.3	13.79	11.78	9.27	10.45	50.17	99.53	97.54	3.83	4.03	4.06	13.8	15.17	17.58	0.77	0.94	0.83	20.1	4.15	20.86	5.31
YDR295C	8.01	5.64	9.95	5.05	26.89	23.44	23.19	21.01	26.64	24.98	19.45	22.88	5.33	1.78	5.01	0.91	14.46	17.13	16.52	4.02	4.63	3.93	10.41	9.05	8.2	9.81	32.7	69.38	78.57	3.44	3.97	3.77	11.98	12.01	13.22	0.9	1.39	0.8	16.52	1.26	17.96	2.73
YDR296W	13.6	7.97	13.29	6.37	15.64	13.08	12.06	10.49	20.34	17.47	14.28	14.42	7.12	1.23	6.45	0.64	14.85	11.09	10.49	2.82	2.08	2.18	15.54	14.01	11.33	13.8	37.77	74.45	70.65	2.54	2.28	2.7	19.24	20.78	25.78	0.63	1	0.61	23.59	5.45	27.01	5
YDR297W	9.87	8.86	11.78	7.7	32.32	25.82	23.66	23.63	37.5	38.14	27.17	30.68	5.8	3.31	4.7	2.06	18.14	15.11	16.4	8.78	9.21	10.18	13.14	13.17	11.68	10.96	51.77	94.3	91.45	2.65	2.27	2.07	13.77	16.15	18.05	0.36	0.47	0.41	24.07	7.01	28.27	10.2
YDR298C	5.23	5.18	4.74	4	5.69	6.75	6.32	5.79	5.59	6.05	5.55	5.64	4.18	2.01	2.78	0.88	6.42	5.98	4.95	2.63	2.59	2.63	8.52	7.5	4.62	8.19	13.14	23.23	24.58	1.15	0.89	1.07	3.4	3.54	4.76	0.36	0.42	0.32	5.32	2.38	5.6	1.7
YDR299W	51.22	38.26	46.61	30.74	126.82	106.19	106.26	93.7	113.1	116.74	100.21	118.65	17.29	7.37	26.08	5.76	75.65	72.14	70.15	17.78	21.26	22.93	58.48	40.95	61.02	69.65	107.58	274.63	254.89	12.92	11.52	12.2	47.39	49.09	58.08	5.24	7.72	5.8	50.11	10.37	44.94	6.14
YDR300C	13.07	8.17	11.55	6.89	31.18	20.81	20.15	18.23	27.27	26.48	20.92	25.25	4.59	1.14	6	1.06	17.35	15.11	16.33	3.18	3.28	4.4	19.01	16.01	17.84	18.25	27.14	57	63.44	3.28	2.36	2.81	10.96	13.15	12.6	1.02	2.84	0.99	13.41	2.01	11.25	2.17
YDR301W	28.39	22.04	31.77	18.46	72.3	54.41	62.02	51.87	58.62	65.23	49.21	58.81	17.46	3.06	16.88	1.74	45.39	48.03	49.67	9.17	10.13	10.51	27.88	20.99	24.54	23.91	116.76	260.96	286.75	17.51	16.35	15.82	38.07	37.95	46.1	5.6	6.34	5.87	44.28	10.23	51.15	10.34
YDR302W	4.84	2.92	5.29	2.35	7.27	5.43	5.19	4.78	5.12	6.02	5.04	4.12	3.59	0.19	2.67	0.14	4.76	3.57	4.11	0.67	0.56	0.54	6.7	7.02	6.28	9.54	17.77	32	32.77	0.91	0.92	0.88	6.7	6.09	7.09	0.25	0.47	0.21	8.12	1.21	9.58	1.65
YDR303C	12.94	10.88	15.46	8.61	42.46	30.79	35.23	31.5	35.36	37.69	28.46	32.73	10.61	1.61	7.48	0.74	24.25	26.54	24.61	4.75	4.68	5.33	15.33	13.54	14.18	14.61	61.59	148.49	163.37	5.37	5.12	4.76	21.35	20.89	28.8	1.8	3.79	2.12	28.93	6.36	32.46	7.9
YDR304C	11.12	6.68	12.98	5.94	15.04	13.31	11.25	12.9	15.02	15.56	13.5	13.06	8.67	1.57	7.81	0.9	14.4	11.82	8.94	2.68	2.7	2.8	18.86	18.77	13.1	17.25	59.57	67.13	71.77	4.23	3.85	3.81	13.04	14.56	15.45	0.98	1.44	0.99	18.24	1.49	19.29	2.38
YDR305C	5.06	2.6	4.02	2.02	5.27	4.6	3.31	3.63	5.65	6.79	5.73	5.59	2.65	0.21	2.38	0.2	4.96	3.29	2.89	0.54	0.58	0.65	4.51	4.32	2.59	4.1	10.38	17.53	20.87	1.62	1.63	1.72	5.03	4.61	5.39	0.4	0.85	0.48	5.86	0.61	7.94	1.36
YDR306C	11.6	6.73	11.83	5.59	21.18	18.51	15.83	16.71	17.74	22.45	15.55	19.13	4.81	0.53	7.39	0.91	14.61	13.04	13.54	2.61	3.13	3.19	14.54	14.81	11.22	15.67	36.92	74.21	77.59	2.59	2.49	2.52	10.98	10.64	12.9	0.36	0.97	0.52	14.49	1.51	17.63	2.86
YDR307W	5.47	2.25	6.94	2.31	16.22	14.38	14.7	11.96	14.16	12.28	9.19	12.69	3.78	0.28	3.15	0.11	9.23	10.68	10.02	0.84	1.28	0.93	5.91	5.12	4.28	6.53	22.28	41.4	49.72	0.33	0.42	0.3	6.95	6.42	8.91	0.08	0.2	0.07	9.53	1.52	12.38	1.52
YDR308C	6.87	4	7.37	3.53	9.74	9.43	8.38	7.35	10.53	11.96	9.82	10.22	3.35	0.14	3.96	0.14	8.1	6.59	6.15	0.73	0.58	0.73	9.5	7.64	7.76	9.13	18.07	39.31	42.22	2.1	1.64	1.76	9.04	9.28	12.35	0.61	0.78	0.77	12.98	2.25	13.8	2.76
YDR309C	25.12	30.11	28.95	24.74	132.98	119.3	122.61	111.72	121.22	137.49	102.15	114.95	19.67	21.99	14.16	8.86	51.26	57.92	48.45	36.98	37.64	39.67	38.82	40.86	27.36	35.45	138.37	324.88	342.21	10.63	9.41	9.87	32.19	31.27	39.68	0.98	1.77	0.88	62.74	24.28	77.51	51.21
YDR310C	30.78	21.06	40.05	18.75	112.86	90.15	97.85	84.58	106.73	108.81	82.45	95.66	29.58	4.76	16.3	1.66	63.85	62.26	68.41	11.26	9.97	10.92	43.32	36.38	36.97	41.73	130.94	313.78	359.15	8.18	8.13	7.93	49.48	50.59	62.38	2.42	5.94	2.86	66.36	8.46	67.37	11.85
YDR311W	9.15	6.13	11.04	5.42	32.9	28.27	28.5	23.07	34.02	34.36	26.21	29	5.66	0.47	5.64	0.29	17.89	17.22	17.57	1.72	1.69	1.68	11.91	10.22	11.02	12.18	46.32	113.68	121.77	4.03	3.89	4.26	17.35	17.48	20.94	1.32	1.74	1.24	16.57	2.42	19.12	2.28
YDR312W	10.77	4.85	9.64	3.74	26.86	21.66	21.14	18.55	31.38	27.54	23.8	24.77	4.38	0.11	4.55	0.1	13.93	12.34	12.25	0.58	0.56	0.6	11.3	5.6	11.53	10.21	37.07	89.72	88.16	3.26	2.84	2.66	13.94	16.15	16.42	0.67	1.27	0.95	16.46	0.74	15.59	0.65
YDR313C	4.17	3.18	4.29	2.26	7.45	6.63	7.65	5.67	9	7.83	4.95	6.36	2.02	0.53	2.07	0.29	6.02	5.91	5.77	1.28	1.14	1.19	6.19	5.53	4.17	5.56	12.5	30.15	40.75	1.35	1.27	1.19	5.44	5.66	6.56	0.32	0.79	0.35	5.72	1.65	6.81	2.16
YDR314C	11.13	7.54	12.01	5.8	29.71	23.89	24.99	23.33	24.37	26.02	18.81	24.43	6.02	0.75	7.71	0.41	17.08	18.93	18.16	2.34	2.63	2.35	14.12	12.62	10.06	13.22	41.54	111.43	118.62	4.35	4.08	3.72	14.89	14.43	19.4	0.78	1.37	0.74	16.76	3.46	20.28	4.09
YDR315C	1.01	0.61	1.16	0.61	1.76	1.63	1.33	1.35	1.36	1.54	1.34	1.57	0.65	0.02	0.52	0.04	1.34	0.98	1.36	0.18	0.2	0.32	1.14	1.05	0.78	1.41	5.15	10.37	13.02	0.56	0.61	0.33	1.14	1.74	1.7	0.04	0.09	0.1	2.7	0.28	2.57	0.97
YDR316W	18.17	10.69	18.96	8.98	33.08	27.37	28.76	23.1	27.87	33.72	23.85	28.95	9.1	0.71	12.01	0.55	19.97	19.04	19.9	2.63	2.23	2.72	26.45	28.69	20.55	29.77	66.78	166.02	161.48	7.41	7.13	6.91	26.36	26.13	33.27	1.58	2.8	1.78	34	7.53	39.85	8.06
YDR318W	7.44	4.2	7.3	3.41	10.17	9.33	9.1	8.61	9	10.79	8.1	9.5	2.86	0.27	4.78	0.39	7.76	6.61	6.69	0.71	1.2	1.47	7.54	6.61	5.85	7.76	18.29	37.54	43.27	1	0.69	0.61	6.56	5.75	8.02	0.16	0.41	0.16	8.77	1.38	8.8	2.19
YDR319C	4.45	1.74	4.17	1.72	8.06	7.38	6.61	6.68	7.74	7.01	6.31	8.01	2.94	0.43	2.61	0.29	6.91	5.45	5.21	1.14	1.35	1.45	5.7	6.08	3.42	5.58	13.18	26.13	31.23	0.72	0.77	0.62	5.29	4.91	6.44	0.13	0.31	0.23	7.85	0.71	9.51	1.63
YDR320C	10.37	4.67	11.38	4.05	35.29	26.89	27.28	26.4	31.73	29.81	22.98	25.57	7.09	0.71	6.09	0.43	23.74	22.79	20.46	2.52	2.48	2.31	12.56	11.13	9.96	10.17	39.75	81.92	85.5	1.86	2.09	1.98	10.54	12.36	14.85	0.31	0.57	0.33	17.89	1.43	18.46	1.71
YDR320C-A	9.31	4.46	8.2	4.37	9.09	7.98	5.68	8.29	10.11	9.22	9.46	8.3	4.99	0.59	5.33	0.54	11.14	5.48	4.74	1.41	2.03	2.03	16.82	21.51	13.68	22.19	18.44	34.41	32.35	0.58	0.75	0.79	10.03	10.63	11.32	0.23	0.4	0.27	13.57	0.69	15.06	2.62
YDR321W	5.86	2.94	5.05	2.88	10.43	9.26	8.44	7.99	11.16	11	9.08	12.43	2.65	0.31	2.71	0.21	6.81	6.7	6.05	0.57	1.06	1.19	5.85	3.8	4.28	5.17	21.69	28.54	29.55	1.66	1.81	1.77	5.98	5.87	6.95	0.68	0.74	0.57	5.42	0.52	6.81	0.76
YDR322C-A	10.84	9.51	10.77	7.51	7.66	8.43	7.22	7.48	9.85	7.62	7.96	7.02	8.31	5.64	6.14	2.65	9.02	5.7	4.76	6.67	6.65	8.07	15.3	17.03	8.95	16.67	25.94	37.95	40.05	1.48	1.53	1.43	8.21	7.47	9.84	0.24	0.23	0.19	13.14	4.05	13.24	5.11
YDR322W	5.47	3.34	5.42	2.51	10.67	9.23	8.47	8.63	11.54	12.09	9.12	10.08	3.31	0.13	2.9	0.08	7.97	7.23	6.1	0.78	0.87	0.73	6.64	6.97	4.26	6.98	16.16	37.14	34.24	0.75	1.06	0.93	5.13	5.1	5.57	0.12	0.3	0.26	7.02	0.82	7.97	1.62
YDR323C	2.7	1.66	2.9	1.34	6.66	5.65	5.48	5.56	6.8	6.77	4.6	5.53	1.38	0.05	1.39	0.02	5.17	4.2	4.67	0.23	0.31	0.5	1.61	1.17	1.27	1.35	10.6	28.14	30.88	0.68	0.64	0.62	3.52	2.65	3.65	0.23	0.29	0.17	4.75	0.63	5.57	0.73
YDR324C	30.1	15.18	31.85	13.71	79.72	59.06	68.74	51.54	71.82	76.1	56.17	74.05	13.94	1.13	13.35	0.78	37.01	39.54	40.26	3.54	4.38	4.25	44.62	31.73	45.97	47.89	81.11	200.1	202.79	6.78	5.87	6.65	31.58	37.37	40.67	1.92	3.59	2.46	37.51	4.65	35.61	5.03
YDR325W	12.88	7.76	13.85	7.37	33.84	24.44	27.05	24.15	27.07	27.11	19.52	21.45	9.14	0.6	7.88	0.32	20.93	20.93	23.46	2.71	2.77	2.57	15.04	12.96	15.68	17.33	48.04	113.76	136.97	3.7	3.78	3.57	17.27	18.36	23.35	0.78	1.95	0.96	25.21	4.48	26.66	4.25
YDR326C	34.5	25.67	40.78	21.95	140.09	110.31	118.76	99.48	116.91	143.86	105.6	133.02	22.91	4.97	19.82	2.64	77.22	81.05	83.24	14.65	14.87	16.29	41.1	30.48	34.96	32.71	109.96	266.91	309.37	15.72	14.6	13.63	46.2	49.52	57.84	7.48	10.99	8.25	54.03	9.78	57.76	12.99
YDR328C	11.68	8.62	11.78	6.54	17.51	14.26	11.51	13.66	21.82	19.92	15.26	15.41	8.26	0.93	6.95	0.57	16.1	11.29	10.58	3.12	2.66	2.42	12.29	10.06	9.13	9.7	46.02	69.54	73.74	3.17	3.23	3.07	17.91	19.54	21.24	1.08	1.93	1.03	21.91	5.6	23.23	4.11
YDR329C	8.03	5.39	9.26	4.64	17.36	14.46	15.69	13.64	18.47	17.69	12.85	14.26	5.45	0.69	4.42	0.43	14.18	10.66	12.5	1.91	2.25	2.44	9.17	7.41	8.63	9.81	39.6	79.51	87.04	3.34	3.21	3.27	14.68	14.87	18.57	0.54	0.86	0.63	17.38	3.16	17.98	2.79
YDR330W	15.96	11.68	18.54	10.18	34.66	27.92	28.44	27.46	33.42	35.69	27.57	29.38	12.11	1.42	11.08	0.75	28.44	24.65	26.61	6.54	5.47	6.64	17.98	17.03	11.77	15.04	67.45	139.57	149.85	6.34	6	5.82	23.22	21.9	29.18	1.12	2.03	1.17	30.28	7.7	33.34	8.66
YDR331W	12.29	7.31	11.29	5.96	17.36	14.13	15.48	14.28	16.18	16.73	13.3	14.82	6.05	0.78	6.29	0.55	13.55	12.41	11.52	2.47	2.9	2.55	11.46	10.54	7.3	8.94	36.65	83.37	76.61	3.44	2.79	3.26	9.45	10.47	13.61	0.74	1.11	0.55	15.92	1.84	16.07	3.59
YDR332W	5.14	2.24	5.44	2.02	13.91	11.18	10.73	10.52	12.35	13.88	9.55	11.07	2.09	0.14	2.5	0.05	7.1	8	8.45	0.63	0.83	0.82	5.17	4.98	4.43	4.89	18.14	36.98	42.99	1.33	0.95	0.96	4.62	4.44	5.85	0.15	0.22	0.11	6.18	0.56	6.78	1.24
YDR333C	18.31	14.19	18.77	11.64	40.19	34.22	37.81	30.56	38.28	42.16	29.91	40.61	7.54	1.87	10.86	1.28	29.65	28.72	29.21	6.96	8.31	7.77	18.24	15.82	13.25	16.46	44.98	102.83	101.25	7.27	7.61	6.26	16.62	13.78	19.62	2.36	3.13	2.37	17.7	4.87	18.92	5.22
YDR334W	49.35	36.68	60.67	31.81	162.19	123.75	145.37	117.09	126.97	139.52	103.17	127.78	43.99	30.74	35.58	12.67	90.86	94.89	106.28	44.17	47.84	52.31	131.64	126.07	104.13	127.96	172.86	418.06	452.5	11.11	10.98	10.03	66.27	58.35	80.93	3.3	5.36	3.43	99.15	116.47	107.9	112.88
YDR335W	32	22.45	41.24	20.79	70.8	52.38	62.19	49.5	57.41	61.98	40	50.45	23.61	3.73	17.43	2.31	49.23	47.78	54.59	9.51	9.99	10.76	47.25	42.5	37.66	45.12	121.2	249.31	268.61	12.44	11.69	11.29	42.37	40.95	50.45	3.03	5.21	2.98	53.41	17.38	53.42	15.82
YDR336W	2.37	0.93	2.87	0.97	4.06	3.98	3.77	3.54	4.76	4.98	3.48	4.26	0.88	0.18	1.32	0.04	2.62	2.59	2.42	0.24	0.34	0.26	2.94	2.86	2.73	3.05	7.09	15.52	14	0.77	0.98	0.73	1.94	1.75	2.67	0.31	0.33	0.27	3.37	0.33	3.71	0.41
YDR337W	14.2	9.12	14.48	7.76	15.43	14.51	13.68	13.98	16.46	17.53	13.32	17.16	6.57	0.65	8.26	0.61	14.76	11	10.75	1.72	2.52	2.35	16.69	15.91	11.96	16.56	31.5	60.54	70.65	2.32	2.07	1.92	13.73	12.82	16.18	0.61	0.76	0.49	15.36	2.19	15.36	3.63
YDR338C	5.69	4.22	6.59	3.26	17.25	14.23	13.74	12.1	14.24	15.95	11.69	15.49	2.53	0.21	3.37	0.4	9.49	8.48	9.78	0.96	1.45	1.34	10.14	7.98	8.46	10.33	20.31	49.85	54.97	1.89	1.74	1.54	7.94	8.98	9.94	0.49	0.94	0.68	8.5	1.15	9.96	1.32
YDR339C	12.12	7.2	12.33	5.93	19.38	18.71	15.51	15.04	25.43	24.13	22.87	22.09	6.05	0.68	6.61	0.5	14.97	10.36	9.74	2.16	2.32	2.52	18.48	17.79	14.45	20.93	32.06	65.6	61.97	2.68	2.25	2.37	14.11	13.68	17.07	1.2	0.97	1.2	17.19	1.12	17.38	2
YDR341C	25.12	17.74	27.38	17.35	81.65	62.14	69.82	60.61	89.21	89.04	73.15	92.2	13.79	5.12	15.12	5.98	37.3	35.97	36.18	11.89	14.45	15.49	42.08	34.07	40.65	52.62	115.75	180.01	183.88	10.94	10.68	10.65	30.41	35.14	36.17	3.65	4.39	3.48	32.98	8.05	31.58	6.09
YDR342C	3.62	6.06	3.24	3.55	6.66	5.58	8.12	7.19	2.97	4.5	2.43	3.3	9.83	15.32	2.07	1.71	11.49	8.98	12.65	13.76	11.73	15.14	3.82	5.31	2.24	4.62	14.18	19.05	22.27	0.87	1.04	0.48	0.25	0.18	0.4	0.1	0.05	0.12	8.12	7.81	7.82	13.28
YDR343C	0.13	0.15	0.04	0.11	0.53	0.33	0.17	0.21	0.53	0.45	0.25	0.13	0.07	0.47	0.09	0.09	0.26	0.36	0.35	0.45	0.27	0.39	0.08	0.18	0.04	0.13	2.05	3.06	3.64	0.45	0.58	0.49	0.14	0.12	0.26	0.2	0.1	0.22	1.81	0.73	2.22	1.25
YDR345C	28.14	47.78	41.93	52.53	455.96	291.62	367.15	299.65	244	329.51	245.54	355.52	31.48	40.46	22.94	17.64	195.51	175.89	168.88	150.88	160.96	228.91	24.57	25.24	29.34	44.88	234.11	439.68	469.65	10.4	8.68	7.82	51.84	43.14	55.74	3.9	4.55	3.43	102.55	153.3	88.38	91.07
YDR346C	22.38	13.2	24.68	12.25	45.88	31.82	37.17	29.6	52.67	48.5	32.77	39.33	15.91	3.9	11.2	1.68	22.03	20.61	28.95	4.87	4.44	5.7	27.92	21.86	27.94	28.82	72.53	125.58	125.2	6.33	6.59	6.67	24.78	29.87	31.21	2.89	4.23	2.88	35.62	8.22	35.94	4.63
YDR347W	12.62	8.83	13.21	6.92	12.83	10.26	11.16	9.94	16.23	12.63	10.93	9.98	7.52	1.28	8.1	0.73	11.27	8.38	10.3	2	2.16	2.16	12.34	10.75	8.98	10.76	37.63	82.49	87.6	2.82	2.82	3.18	14.48	16.63	18.47	0.89	0.97	0.82	17.81	2.57	19.04	3.16
YDR348C	19.09	12.2	24.55	10.29	62.47	52.31	56.42	51.09	64.89	58.25	46.62	52.07	16.05	2.18	12.7	1.06	39.39	37.26	38.64	6.99	6.76	6.71	33.31	27.62	28.53	31.43	72.41	161.27	179.19	5.09	4.89	4.43	30.29	31.53	38.78	1.14	2.27	0.94	40.13	8.96	44.19	10.2
YDR349C	9.64	7.11	11.81	7	24.49	20.79	21.43	18.23	28.3	27.06	21.35	25.78	6.55	0.68	5.53	0.36	15.67	15.93	17.71	2.76	2.72	2.68	12.21	8.78	9.57	10.57	40.39	83.45	89.21	5.49	5.49	5.54	13.48	13.89	15.47	2	2.52	1.83	15.92	2.49	14.81	2.03
YDR350C	7.55	6.41	9.49	6.17	18.7	15.83	16.18	14.49	14.29	17.53	12.72	16.58	3.78	1.78	5.09	1.63	14.67	14.75	14.85	5.61	6.14	6.45	10.33	10.52	8.19	10.97	23.63	54.91	54.41	4.88	4.37	3.94	8.23	7.52	9.96	1.72	1.64	1.37	10.09	4.02	10.87	5.06
YDR351W	25.16	20.5	30.44	18.1	86.39	67.51	70.8	61.42	73.29	80.79	60.48	74.48	11.99	2.65	14.37	2.06	51.28	52.53	60.2	10.9	12.42	13.5	33.84	28.85	32.18	34.97	78.54	206.21	222.54	19.46	16.74	17.37	31.44	28.44	37.85	6.62	9.21	7.48	31.68	13.96	37.3	13.85
YDR352W	11.22	5.72	10.36	4.78	15.38	15.18	12.82	14.17	17.41	16.33	15.35	17.32	3.69	0.6	6.48	0.68	11.06	10.57	9.2	1.96	2.42	2.74	16.24	13.83	10.67	15.04	21.91	40.28	42.5	1.95	1.85	1.5	8.91	9.07	10	0.93	0.89	1.2	9.47	1.26	10.21	2.68
YDR353W	328.05	444.4	313.14	377.67	271.75	244.37	257.9	257.01	257.38	273.73	274.18	312.07	39.14	57.35	257.58	238.02	492.68	377.16	355.49	524.56	559.81	610.34	313.45	317.68	246.15	354.78	448.59	794.71	755.42	20.06	17.55	18.19	280.03	308.91	321.29	17.47	25.17	16.27	245.98	170.68	244.7	197.28
YDR354W	9.46	7.43	8.74	6.7	22.07	17.01	19.74	18.78	23.79	22.32	21.08	23.58	3.99	2.35	6.3	3.35	14.93	11.61	15.3	9.8	9	11.91	15.1	14.1	15.27	19.24	41.84	81.36	79.27	7.31	6.01	6.47	14.97	15.22	16.97	3.29	2.91	3.12	18.81	10.39	19.77	7.73
YDR356W	19.98	14.58	22.72	13.1	48.46	38.75	44.97	36.74	36.01	36.62	28.91	33.29	16.53	3.06	12.9	1.71	32.86	30.67	29.87	6.44	7.47	7.12	23.67	21.15	18.7	23.92	103.92	229.45	253.49	9.61	8.35	8.8	31.31	34.39	41.74	3.43	4.58	3.6	37.59	11.88	42.3	11.99
YDR357C	4.14	2.87	3.7	2.37	3.32	3.63	3.07	2.89	3.93	4	3.1	3.35	2.13	0.38	1.94	0.19	3.49	2.75	2.7	0.86	0.89	1.06	2.88	2.31	1.79	2.6	14.3	17.61	19.68	0.98	0.84	1.19	3.86	3.75	4.96	0.2	0.29	0.2	8.96	0.73	9.48	1.86
YDR358W	8.3	5.78	10.9	5.67	14.88	12.76	12.53	13.25	13.86	13.9	10.51	11.18	9.82	3.48	6.56	1.01	14.48	12.09	14.22	3.96	3.89	4.25	8.37	10.4	4.98	6.74	53.26	103.87	116.17	3.82	3.66	3.12	15.38	15.99	21.16	0.58	0.9	0.65	29.28	3.72	31.75	7.09
YDR359C	21.33	20.27	25.91	17.79	101.69	87	93.94	82.47	89.57	92.77	72.34	83.92	19.94	5.68	13.3	2.09	61.7	61.37	67.78	13.42	14.47	14.6	28.6	32.22	22.76	30.98	87.75	222.05	241.86	4.07	4.33	3.76	32.34	28.85	41.17	1.18	1.76	1.62	69.79	27.11	77.18	33.79
YDR361C	9.25	4.79	7.29	3.64	12.93	11.26	10.38	10.58	15.3	14.38	11.71	12.59	3.52	0.56	4.4	0.41	8.14	7.32	6.59	1.48	1.63	1.66	10.93	7.75	9.47	13.37	21.84	45.26	42.29	1.25	1.21	1.15	8.77	10.66	10.33	0.41	0.72	0.41	7.8	0.52	7.62	0.63
YDR362C	6.74	3.95	7.03	3.38	16.72	13.03	13.51	11.16	16.05	14.46	11.27	12.77	5.26	0.24	4.07	0.26	10.27	9.36	11.45	1.28	1.3	1.57	8.26	6.59	7.23	7.91	22.4	50.01	53.71	1.51	1.56	1.51	8.69	9.66	11.12	0.18	0.78	0.18	11.39	2.51	13.44	2.13
YDR363W	8.1	4.44	9.84	3.77	28.58	20.34	22.24	18.62	26.89	29.14	19.39	26.98	4.48	0.19	4.83	0.19	16.1	17.47	18.21	1.23	1.39	1.27	10.25	7.7	9.49	8.99	37.81	91.73	95.79	1.7	1.45	1.52	8.58	10.33	12.5	0.34	0.66	0.36	14.06	1.54	14.05	1.86
YDR363W-A	53.11	26.04	49.73	20.38	43.14	40.92	32.33	38.8	51.46	48.5	44.01	43.08	24.72	4.03	36.9	3.19	50.36	31.63	26.77	9.83	10.61	10.81	79.34	86.05	56.15	93.38	128.93	183.7	192.85	4.14	4.11	3.58	56.19	59.42	73.86	1.27	2.59	1.18	88.11	9.5	101.16	21.99
YDR364C	10	4.42	10.67	3.65	22.73	18.01	18.9	16.12	19.23	20.51	16.08	17.88	4.23	0.18	5.03	0.21	11.95	11.79	10.79	1.04	1.06	1.04	12.08	9.76	11.37	11.78	32.06	70.91	71.28	1.68	1.89	1.78	8.52	8.52	9.8	0.34	0.7	0.4	10.69	1.86	11.02	2.05
YDR365C	73.48	73.81	74.99	56.3	218.31	156.92	184.49	166.62	232.41	228.51	167.26	207.74	39.47	35.81	40.65	15.69	127.44	115.36	152.27	68.7	76.18	81.05	81.07	59.49	75	75.24	161.89	332.36	317.98	12.68	11.25	12.16	55.34	58.85	58.69	3.89	5.46	3.92	57.75	26.92	56.57	28.16
YDR367W	1.77	0.67	1.78	0.68	2.32	2.18	1.88	1.54	2.39	2.16	1.9	2.02	1.06	0.06	0.91	0.02	1.77	1.18	1.29	0.13	0.14	0.13	1.62	1.46	0.95	1.06	6.76	9.25	10.78	0.48	0.36	0.3	2.04	1.89	2.31	0.04	0.13	0.09	2.75	0.19	2.82	0.36
YDR368W	22.94	19.28	23.56	17.92	27.13	23.91	22.7	22.98	22.91	24.13	21.3	24	6.72	2.93	15.86	7.09	27.2	24.97	22.34	16.13	16.42	17.95	42.19	43.17	28.31	39.12	60.21	101.06	106.44	4.08	3.71	3.32	26.43	27.8	29.31	1.38	1.79	1.2	23.45	7.49	27.19	9.93
YDR369C	5.39	2.69	6.86	2.21	15.96	11.83	12.24	11.16	10.43	12.49	8.5	11.23	2.61	0.07	3.15	0.12	9.51	8.7	11.71	0.71	0.9	0.82	5.69	5.15	5.25	6.34	21.91	44.22	47.13	1.13	1.48	1.35	6.08	5.79	7.41	0.25	0.36	0.2	9.39	0.99	8.5	1.29
YDR370C	5.64	4.35	6.05	3.46	10.9	8.93	9.94	9.39	13.43	11.27	9.57	11.5	2.64	0.39	3.38	0.48	7.81	6.18	5.02	1.67	1.82	1.42	5.66	5.24	5.97	7.18	17.06	44.54	39.07	2.82	2.45	2.67	5.52	5.65	6.66	0.77	0.7	0.67	7.15	1.82	8.32	2.59
YDR371W	5.24	3.57	5.61	2.93	9.88	7.28	8.09	6.89	9.4	10.41	7.07	9.07	3.62	0.34	3.17	0.26	5.59	4.54	6.36	0.83	0.85	0.93	5	5.63	4.22	6.68	17.51	34.17	36.62	4.69	3.83	3.08	5.06	4.59	6.12	0.45	0.59	0.42	8.85	1.3	10.42	1.11
YDR372C	19.78	14.93	20.23	13.46	28.39	23.74	25.75	20.85	31.2	32.47	23.82	32.09	13.83	3.3	11.53	1.86	19.57	18.72	20.43	4.37	5.06	5.72	26.88	23.85	19.24	27.3	72.3	136.75	139.84	9.06	7.88	8.25	23.37	25.27	27.81	3.25	5.01	3.26	33.19	7.86	32.74	9.73
YDR373W	3.76	2.33	4.43	1.94	3.53	2.85	2.55	3.21	3.88	3.84	2.81	3.35	2.19	0.39	1.6	0.19	3.1	2.7	2.53	0.47	0.65	0.67	5.11	4.91	4.39	5.68	13.33	23.23	26.68	1.39	1.32	1.12	3.71	4.14	4.15	0.3	0.36	0.25	5.48	0.82	4.87	0.79
YDR374W-A	0.8	0.53	0.72	0.31	0.42	0.48	0.52	0.55	0.63	0.35	0.38	0.43	0.37	0.02	0.47	0.02	0.6	0.59	0.3	0.02	0.08	0.15	0.32	0.21	0.14	0.21	4.44	7.4	7	0.2	0.27	0.16	1.02	0.81	1.13	0.03	0.05	0.06	2.1	0.06	2.47	0.19
YDR375C	6.68	4.67	6.37	3.92	12.51	10.51	11.6	10.17	13.73	11.99	10.84	11.31	3.54	0.96	4.1	0.66	8.46	7.29	7.32	2.22	2.06	2.11	7.41	7.87	5.58	7.45	22.88	55.79	57.35	2.18	2.19	2.01	7.85	8.22	10.94	0.85	0.76	0.76	10.15	2.45	11.68	3.81
YDR376W	4.51	2.32	6.1	2.14	10.3	8.08	8.18	6.64	9.68	9.22	5.49	6.87	3.85	0.38	2.83	0.09	6.12	5.27	5.26	0.58	0.44	0.47	5.72	5.69	4.37	5.79	30.01	50.81	56.51	1.68	1.48	1.47	6.49	7.14	8.57	0.23	0.43	0.3	10.88	1.62	11.83	1.27
YDR377W	6.31	4.82	6.96	3.81	8.51	7.38	8	7.37	7.11	9.19	8.05	8.14	5.1	4.06	3.52	1.51	7.63	6.25	5.91	5.26	5.45	4.51	9.5	10.47	7.11	10.96	17.51	25	28.92	0.95	1.08	0.87	4.39	5.16	5.61	0.16	0.32	0.15	8.5	2.92	7.94	5.9
YDR378C	9.74	5.83	8.43	5.15	6.43	5.93	4.67	5.3	7.31	8.12	6.96	6.04	4.05	0.47	5.72	0.35	6.83	3.68	3.57	1.49	1.24	1.4	8.72	8.55	5.69	9.79	25.08	32.48	33.05	1.99	1.72	1.39	8.26	9.08	11.38	0.77	0.8	0.7	12.25	0.74	12.66	1.92
YDR379C-A	0.69	0.32	0.67	0.36	0.5	0.95	0.96	0.57	0.6	0.59	0.36	0.75	0.78	0.29	0.75	0.06	1.32	1.2	0.84	0.41	0.42	0.6	0.53	0.91	0.31	0.66	6.05	4.82	6.37	0.18	0.12	0.02	1.21	1.17	1.78	0.03	0.03	0.04	2.73	0.35	3.43	1.32
YDR379W	14.2	8.13	18.81	8.03	65.92	54.63	56.33	51.27	66.15	68.05	49.92	57.79	9.83	1.65	8.64	0.88	39.35	41.01	39.88	7.43	7.66	7.85	22	20.76	19.81	22.47	82.04	195.36	216.79	10.11	8.9	9.44	21.08	20.96	26.15	1.72	2.33	1.7	32.25	4.63	35.31	7.04
YDR380W	2.01	4.17	2.12	3.55	10.3	10.03	11.22	12.72	5.32	4.98	4.93	6.2	4.67	8.23	1.74	2.32	13.84	9.91	12.86	14.77	14.13	17.17	1.22	1.97	1.55	2.89	48.79	76.46	97.19	0.8	0.61	0.78	5.98	7.73	15.92	0.09	0.44	0.35	34.92	17.2	33.47	18.37
YDR381C-A	2.84	1.72	3.35	1.25	3.5	3.33	2.61	2.62	4.06	4.61	3.52	3.67	1.55	0.29	1.68	0.26	3.13	2.39	2.04	0.6	0.69	0.6	2.47	2.77	2.06	2.84	11.76	24.12	23.18	1.06	0.93	0.92	4.08	4.82	5.02	0.24	0.17	0.23	7.31	0.86	6.94	1.27
YDR381W	27	27.35	27.25	22.45	46.62	36.52	44.36	40.06	48.31	48.66	40.96	45.13	14.19	16.73	16.79	12.15	33.13	28.9	28.55	27.1	30.48	33.42	30.21	29.06	23.06	32.76	69.24	123.17	128.49	3.64	3.39	3.31	22.84	19.36	28.31	0.72	1.45	0.91	31.63	45.63	35.71	49.64
YDR382W	48.19	41.95	43.71	34.54	51.67	45.43	43.43	42.06	52.47	53.14	41.31	50.08	25.38	20.02	29.88	13.16	42.09	30.47	36.53	21.29	25.75	28.26	60.06	64.17	35.65	51.98	147.48	134.82	108.26	15.18	14.25	12.12	31.19	30.85	37.18	5.86	2.96	5.17	41.86	30.55	44.67	20.82
YDR383C	7.99	4.67	8.53	4.53	11.88	11.18	10.06	10.42	10.16	11.83	8.88	9.5	4.63	1.38	7.27	0.82	10.49	8.7	7.51	2.01	1.93	1.77	9.61	9.12	7.18	11.02	24.08	64.32	59.31	2.12	1.95	1.85	14.72	13.73	19.14	0.71	1.26	0.62	14.63	0.63	18.39	1.59
YDR384C	4.38	2.55	3.64	2.4	8.67	6.1	7.02	6.75	10.99	9.48	7.12	7.96	2.34	1.22	1.96	0.59	4.38	4.11	3.54	0.99	1.63	1.53	4.53	2.77	2.96	3.47	9.97	25.49	23.18	0.19	0.2	0.15	8.07	9.14	8.32	0.12	0.27	0.14	7.12	1.56	6.81	1.59
YDR385W	13.6	12.21	14.82	12.86	34.03	30.44	29.92	27.05	28.07	30.6	23.24	31.53	8.87	7.69	8.71	4.05	23.18	24.45	22.36	14.2	15.75	17.09	17.08	18.2	12.51	17.12	73.16	62.07	68.83	7.39	6.8	7.24	12.08	13.8	13.85	2.76	1.56	2.15	15.38	9.3	16.55	9.3
YDR386W	4.58	1.86	4.53	1.5	13.27	11.63	11.39	10.1	10.41	11.29	9.64	10.86	2.37	0.07	3.35	0.1	8.61	8.36	7.93	0.34	0.59	0.63	5.46	4.69	4.26	5.05	19.19	47.11	47.83	1.35	1.28	1.14	8.72	7.52	9.38	0.23	0.36	0.31	9.98	0.3	10.92	0.89
YDR387C	2.3	1.23	2.63	1.25	7.66	5.53	6.61	5.72	7.81	7.01	5.13	6.6	1.55	0.43	1.13	0.09	5.08	4.27	4.72	1.05	0.97	1.08	4.03	3.29	2.43	3.71	9.03	17.12	20.52	0.86	0.91	0.61	3.06	3.12	3.97	0.33	0.47	0.23	4.56	0.91	5.04	1.22
YDR388W	31.51	23.53	36.41	21.28	58.55	49.68	47.67	45.69	59.22	59.45	44.3	50.85	27.54	5.44	22.85	2.42	52.83	41.35	41.34	11.65	11.66	13.59	48.2	48.63	31.93	40.34	164.95	243.04	271.55	13.18	13.55	11.74	52.65	56.17	64.75	5.71	8.27	6.42	64.79	14.82	73.87	20.13
YDR389W	21.1	18.61	24.67	17.33	90.26	75.79	82.34	69.45	80.97	87.66	61.84	75.99	16.94	15.11	12.6	6.49	48.87	52.49	57.32	27.15	30.38	31.65	30.01	27.28	24.9	30.8	101.53	243.92	262.38	6.01	6.05	6.36	30.81	27.57	35.83	1.12	2.16	1.45	45.12	23.11	47.09	34
YDR390C	17.31	9.88	18.31	8.91	40.85	30.99	33.84	29.87	36.21	37.64	28.42	34.64	9.98	0.78	9	0.46	24.08	23.49	21.33	1.9	2.34	2.5	20.1	18.49	18.31	23.89	63.94	137.8	145.3	3.32	2.81	2.59	18.92	21.47	24.95	0.66	1.63	0.63	28.09	5	28.45	5.38
YDR391C	2.34	1.59	2.89	2.05	4.16	3.75	4.03	2.89	4.84	4.66	3.73	4.58	2.71	1.7	2.18	0.65	4.19	2.75	2.89	1.74	1.25	1.75	3.6	5.05	2.15	3.33	7.24	16.64	13.23	0.28	0.37	0.46	2.11	2.09	2.09	0.02	0.04	0.06	4.18	0.43	5.78	1.22
YDR392W	6.89	4.27	7.75	3.47	13.04	10.98	9.94	10.38	13.99	13	9.61	10.22	4.35	0.35	3.75	0.16	11.17	9.43	9.57	0.96	1.08	1.14	7.47	6.72	5.87	7.62	21.01	43.41	47.83	0.95	1	1.08	10.11	10.28	12.74	0.23	0.56	0.13	12.25	2.51	12.08	2.6
YDR393W	19.43	14.58	19.19	12.03	38.95	33.89	31.75	33.29	33.97	33.03	26.93	31.82	8.85	2.45	12.98	1.86	27.43	25.72	22.92	7.59	8.97	8.76	19.76	19.02	15.33	21.84	52.41	116.33	130.45	4.61	4.74	4.34	20.75	20.13	25.4	1.46	2.69	1.19	24.23	5.17	28.88	8.63
YDR394W	50.77	31	53.79	26.88	84.12	71.52	73.01	67.09	84.15	85.82	63.18	73.2	31.48	5.12	27.81	2.82	72.61	66.42	63.04	15.04	14.18	15.32	65.87	66.76	50.14	61.94	163.83	307.67	345.85	12.63	11.01	11.54	65.95	66.36	78.22	4.42	6.94	3.86	86.54	15.66	92.39	25.56
YDR395W	24.96	15.88	29.74	14.93	69.5	49.13	57.78	45.74	57.71	57.05	42.94	53.56	13.64	2.18	11.08	1.45	33.28	35.45	39.98	5.96	7.45	7.38	33.37	26.55	32.44	34.59	84.62	178	177.86	12.11	11.12	10.1	24.66	28.36	29.37	3.54	5.61	3.74	26.99	7.85	25.98	6.66
YDR397C	6.92	10.41	7.93	9.51	15.93	13.63	14.55	12.83	14.87	14.62	12.31	13.12	8.37	12.4	4.87	4.91	13.04	10.77	13.49	15.89	12.83	16.37	11.2	11.86	10.78	12.99	24.22	45.5	46.29	0.22	0.2	0.2	8.99	9.86	10.79	0.11	0.26	0.07	21.45	6.25	20.63	11.57
YDR398W	28.95	16.27	31.5	15.1	103.56	78.72	83.44	70.33	85.91	81.74	69.31	80.62	12.09	2.46	14.13	1.52	48.3	51.33	56.17	7.84	8.68	9.51	39.43	23.41	40.47	41.73	76.82	175.42	176.88	6.77	6.29	6.34	34.35	35.88	38.91	2.43	4.53	2.59	34.92	6.12	30.49	5.05
YDR399W	14.78	14.05	18.42	16.81	40.27	33.62	33.66	32.24	50.4	48.42	45.46	47.76	8.98	7.55	6.74	3.61	23.35	19.93	16.4	13.61	17.35	17.58	26.33	20.21	19.09	24.5	26.46	48.56	49.65	2	2.23	1.75	5.56	5.98	6.95	0.34	0.36	0.36	12.76	4.56	13.09	8.73
YDR400W	2.99	0.71	2.82	0.76	7.61	7	6.52	6.59	6.38	6.87	5.51	6.12	1.72	0.72	1.96	0.22	5.62	3.79	4.04	1.3	1.14	1.81	2.94	1.78	2.16	2.5	13.66	17.61	24.51	0.64	0.67	0.61	2.99	3.24	3.69	0.17	0.19	0.16	4.29	0.35	5.32	0.48
YDR403W	0.17	0.13	0.13	0.1	1.79	1.63	0.81	0.99	1.34	1.7	1.05	0.96	0.05	0.06	0.05	0.04	0.81	0.68	0.33	0.1	0.14	0.15	0.13	0.05	0.06	0.06	2.87	5.23	7.49	0.67	0.69	0.72	0.46	0.26	0.45	0.16	0.21	0.3	0.67	0.09	1.01	0.11
YDR404C	7.08	5.35	6.69	4.49	7.87	6.18	7.13	5.83	8.54	8.28	7.63	7.61	3.67	0.73	3.62	0.54	5.98	5.63	4.74	1.56	1.7	2.18	8.9	8.43	5.73	8.07	17.77	29.91	31.86	1.7	2.13	1.85	6.34	6.63	7.41	0.89	0.86	0.71	7.29	1.23	7.94	2
YDR405W	26.67	20	25.21	17.15	44.83	39.77	38.3	37.72	55.24	50.55	42.74	40.23	13.5	4.83	17.44	3.16	41.86	33.33	30.01	13.5	13.51	13.68	30.95	32.62	24.67	33.06	68.83	148.65	153.98	8.56	8.06	8.09	41.9	38.21	49.94	2.63	3.3	2.69	54.35	8.78	60.66	17.96
YDR406W	9.08	9.16	12.27	9.8	37.69	31.94	35.29	31.39	25.3	27.11	25.59	30.47	15.99	18.31	8.52	4.76	49.02	53.28	58.49	48.78	50.99	57.77	4.24	4.46	3.46	3.74	27.81	61.58	63.86	3.04	2.75	2.57	20	18.83	28.48	1.21	1.26	1.23	15.79	8.92	18.21	11.25
YDR407C	27.52	21.88	29.54	19.55	62.34	44.63	55.58	46.03	51.94	53.43	39.04	48.91	14.71	3.46	15.52	2.32	41.05	41.49	45.89	9.9	11.13	10.46	29.21	26.22	23.83	26.57	87.79	184.83	199.43	12.65	10.77	10.72	29.22	27.74	34.69	3.14	4.82	2.79	33.81	9.02	38.56	10.99
YDR408C	6.98	4.58	6.23	3.62	9.64	8.83	7.63	7.71	13.61	12.73	12.25	9.82	4.24	1.28	4.09	0.67	6.25	5.18	4.67	2	2.01	2.27	10.72	9.86	7.04	10.57	26.28	48.88	42.85	1.74	1.42	1.68	9.04	10.05	11.42	0.48	0.46	0.47	14.73	1.6	16.39	3.13
YDR409W	10.96	8.43	12.04	7.02	51.12	44.5	40.42	37.45	46.95	53.38	37.21	43.53	7.4	2.19	7.19	1.05	32.41	32.54	30.95	8.7	8.97	9.99	13.29	10.88	11.77	13.11	54.38	137.88	144.6	9.87	8.72	8.92	22.91	20.06	27.89	2.93	3.61	3.32	24.96	5.06	32.33	9.39
YDR410C	5.47	3.74	5.71	3.54	7.11	7.5	6.15	6.47	7.54	9.24	7.27	8.3	2.38	0.16	3.42	0.24	6.57	5.77	4.5	0.81	1.35	1.27	7.23	7.02	4.88	7.62	13.62	23.96	23.6	0.95	0.81	0.67	4.93	4.59	5.79	0.43	0.44	0.36	6.21	0.54	6.84	1.02
YDR411C	5.52	5.6	6.05	4.93	20.15	16.68	16.12	16.81	22.56	22.53	18.36	17.35	5.55	1.87	3.88	0.7	20.08	14.84	15.2	7.37	5.39	6.97	5.62	5.17	4.26	4.93	23.03	41.48	46.36	3.41	3.07	3.12	8.09	7.72	11.3	0.84	1.58	0.95	13.39	2.05	16.37	3.86
YDR412W	41	24.28	34.48	18.85	53.54	45.98	40.53	37.52	70.16	64.59	57.67	56.06	15.76	2.28	21.26	1.52	36.54	29.42	29.3	4.71	4.68	5.65	47.32	31.44	36.86	43.98	81.04	172.45	165.96	5.63	6.02	6.95	39.47	47.95	47.57	2.1	3.49	2.46	47.71	7.25	47.54	7.08
YDR414C	1.75	1.2	1.62	0.92	4.08	3.38	4.23	3.65	4.71	4	2.68	3.88	1.24	0.17	0.86	0.13	3.15	2.79	3	0.62	0.61	0.69	1.93	2.08	1.88	2.38	6.27	13.43	14.78	0.83	0.68	0.55	2.06	2.16	2.59	0.23	0.35	0.21	2.67	0.35	3.43	0.44
YDR415C	6.79	3.54	8.12	3.12	12.12	11.16	10.26	9.25	13	12.49	11.13	11.02	4.51	0.2	4.24	0.11	8.63	8.2	8.66	1.2	0.96	1.16	10.07	10.58	8.88	10.02	29.19	62.23	74.58	3.09	2.48	2.55	11.2	13.07	16.47	0.71	0.94	0.88	15.63	2.23	15.99	2.55
YDR416W	13.62	6.36	15.38	5.95	33.05	27.34	27.37	23.95	29.26	31.3	23.27	30.87	5.44	0.29	7.66	0.24	19.97	19.54	18.91	1.46	1.68	1.45	17.02	14.25	15.04	17.79	44.05	103.31	121.49	2.85	2.77	2.74	13.17	14.1	17.58	0.48	1.03	0.62	17.16	2.84	17.81	2.21
YDR418W	25.97	19.1	21.92	15.96	28.15	26.77	24.64	25.14	29.71	26.93	25.39	26.13	16.97	11.47	13.58	6.55	24.8	19.45	16.92	16.73	17.65	19.67	33.45	34.22	21.61	30.04	130.31	97.04	93.76	7.2	6.96	6.93	24.34	25.66	27.71	3.12	2.45	3	30.36	12.09	32.44	11.33
YDR419W	7.01	2.96	7.45	2.93	15.01	11.16	11.89	11.64	13.38	13.85	10.51	11.81	4.09	0.35	3.79	0.25	9.32	8.45	9.81	0.75	0.97	0.95	6.28	5.03	5.19	6.28	20.79	48.88	46.15	1.35	1.16	1.18	7.39	7.1	10.07	0.17	0.38	0.22	10.47	1.97	11.55	1.59
YDR420W	50.64	34.87	61.47	31.85	326.22	252.77	268.13	235.47	280.47	320.56	241.88	291.66	31.38	12.98	29.95	5.62	158.61	170.62	174.55	42.37	44.1	49.45	78.29	72.54	72.05	92.59	180.18	444.67	490.31	18.76	15.91	17.59	73.29	66.5	83.89	4.78	8.93	5.87	90.59	25.66	100.53	49.69
YDR421W	8.03	3.61	9.34	3.46	20.54	16.63	15.83	12.74	14.59	16.11	12	13.78	4.24	0.46	5.16	0.76	13.34	12.86	15.91	1.66	1.76	2.01	11.07	8.85	9.69	11.84	32.25	80.07	84.52	2.41	2.32	2.17	9.35	9.65	10.92	0.78	1.07	0.96	15.38	3.68	15.06	3.03
YDR422C	19.25	14.22	18.77	11.02	50.49	40.15	42.36	38.64	48.94	51.14	39.06	48.32	9.58	1.11	10.5	0.63	32.73	30.4	33.06	4.71	5.03	4.21	16.76	11.73	13.7	14.64	54.01	136.75	147.33	8.5	8.53	8.84	22.79	23.73	28.31	3.64	5.31	4.23	26.26	4.96	27.04	5.52
YDR423C	19.94	11.85	23.02	10.35	43.38	39.62	35.43	32.92	48.76	49.22	41.11	40.9	10.36	1.38	11.87	1.18	33.05	29.31	25.43	5.71	6.24	7.05	24.55	19.85	15.26	18.96	63.64	135.31	147.33	5.71	5.81	5.2	34.26	38.3	40.77	1.62	2.92	1.48	39.86	3.07	44.82	4.38
YDR424C	2.71	1.68	2.73	1.51	1.63	1.18	1.28	1.13	1.81	1.84	1.16	1.54	1.34	0.17	1.64	0.16	1.79	1.11	1.1	0.24	0.45	0.24	3.04	3.54	1.96	2.83	7.58	7.48	7.49	0.48	0.34	0.47	2.33	2.42	2.73	0.09	0.2	0.07	2.81	0.3	3.48	0.49
YDR425W	10.54	7.41	11.71	5.73	45.51	42.93	38.24	37.13	37.85	49.06	33.71	40.39	5.55	0.25	6.85	0.34	31.99	36.17	31.32	3.94	3.47	5.07	13.71	11.87	9.89	12.05	41.69	98.81	111.62	3.91	3.9	3.34	16.79	15.8	20.74	1.32	1.96	1.2	18.05	1.8	20.53	4.59
YDR427W	17.75	14.15	24.32	11.94	53.68	39.35	44.74	36.51	51.64	46.96	34.49	40.31	15.29	4.1	8.39	1.66	35.88	28.06	42.79	11.47	10.16	12.21	27.19	23.09	26.25	28.5	93.84	205.89	206.71	8.05	8.13	7.5	29.74	31.2	38.74	2.56	5.73	2.48	45.85	13.67	42.98	17.42
YDR429C	30.28	17.88	27.81	13.65	33.9	31.12	27.69	26.11	42.34	37.69	34.31	36	14.39	2.1	15.37	1.16	25.99	21.38	17.36	4.38	4.93	4.14	38.01	29.93	23.16	30.04	76.11	119.31	108.12	5.38	5.86	6.01	25.39	28.9	29.91	3.08	3.81	3.24	26.47	3.68	26.31	5.44
YDR430C	17.48	10.44	22.23	9.75	41.98	31.29	36.62	29.73	36.52	39.37	26.23	33.63	12.03	1.42	9.24	0.54	28.1	25.52	30.62	4.46	4.48	4.53	21.88	19.25	17.02	17.45	69.5	136.03	144.53	6.13	5.55	5.16	18.59	19.66	23.78	1.86	2.77	1.77	25.58	5.48	29.53	4.85
YDR432W	135.57	133.12	127.74	105.59	402.02	357.96	342.91	322.08	329.11	429.55	329.13	394.13	70.64	70.52	102.31	50.99	314.23	299.99	203.43	217.24	211.62	246.9	187.44	169.74	113.88	154.71	328.92	701.69	733.5	35.67	36.13	37.41	123.12	129.9	147.34	13.64	18.52	13.01	149.69	87.42	161.27	122.48
YDR434W	6.45	2.9	7.52	2.75	12.98	10.83	10	9.14	9.9	11.83	9.21	10.96	4.52	0.46	3.74	0.31	8.85	8.52	8.35	0.44	0.68	0.76	6.39	4.5	5.61	5.85	32.21	65.68	70.16	2.12	1.48	1.72	10.64	10.64	12.44	0.59	1.05	0.71	14.44	0.43	14.17	0.75
YDR435C	1.54	0.62	1.4	0.69	2.58	2.08	2.46	2.32	2.32	3.04	2.14	2.71	0.93	0.02	1.01	0.01	2.34	2.16	1.52	0.08	0.11	0.17	1	1.14	0.72	0.85	5	9.97	11.2	0.14	0.17	0.16	2.14	1.91	2.81	0.03	0.03	0.07	3.02	0.19	2.77	0.11
YDR436W	7.02	2.64	8.1	2.48	38.53	32.57	27.92	27.87	27.17	32.07	22.2	27.65	5.34	0.13	4.57	0.06	23.95	24.47	24.33	1.09	1.16	1.08	10.73	10.72	7.57	9.43	30.83	77.9	81.02	1.16	1.01	1.02	11.73	11.28	13.93	0.21	0.32	0.18	18.3	0.58	19.47	1.11
YDR437W	2.56	0.94	2.35	0.97	10.67	9.96	9.45	7.99	11.72	12.65	7.83	10.59	0.99	0.04	1.4	0.03	4.91	5.61	6.19	0.36	0.42	0.3	2.67	2.38	1.76	2.2	7.65	22.75	24.86	0.77	0.68	0.67	2.87	3.14	3.44	0.19	0.3	0.11	3.37	0.37	4.69	0.35
YDR438W	2.27	1.12	2.7	1.05	4.9	4.25	3.62	3.88	5.67	5.3	3.64	4.79	1.37	0.11	1.27	0.04	2.36	2.61	3.1	0.1	0.24	0.17	2.09	1.83	2.01	2.21	8.85	23.07	27.24	0.6	0.65	0.72	2.53	2.4	3.6	0.08	0.33	0.1	2.94	0.24	4.29	0.56
YDR439W	4.06	1.79	3.99	1.48	8.3	7.58	6.81	5.51	9.37	9.64	6.02	7.56	2.13	0.13	1.72	0.05	4.91	5.09	5.65	0.26	0.49	0.39	4.08	3.11	3.12	3.27	12.84	29.83	29.76	0.77	0.52	0.73	4.03	3.33	4.68	0.12	0.17	0.16	5.72	0.61	6.36	1.14
YDR440W	8.55	5.13	10.31	4.41	27.5	21.59	23.86	20.43	19.86	19.2	15.15	18.76	5.56	0.31	4.93	0.19	13.85	14.56	16.26	1.33	1.48	1.75	9.99	7.43	9.37	10.45	36.69	89.4	98.73	2.38	2.5	2.06	13.73	13.99	17.38	0.39	1.1	0.45	17.73	0.56	17.53	1.35
YDR441C	6.32	4.93	6.21	3.31	11.54	9.78	8.9	8.93	15.07	14.73	12.72	12.61	2.04	0.7	2.42	0.67	6.27	4.84	4.57	1.95	2.13	2.48	6.65	7.27	4.74	7.56	10.9	20.5	21.5	1.36	1.1	1.01	5.4	5.49	6.44	0.55	0.7	0.64	9.26	1.1	9.13	1.68
YDR443C	14.33	8.15	19.2	7.85	48.83	39.72	43.14	33.91	41.43	43.79	30.63	37.07	10.59	0.98	7.65	0.37	29.56	30.27	31.18	3.07	3.06	3.56	17.85	16.12	13.38	15.83	92.42	198.82	221.91	6.36	5.83	5.69	23.56	22.25	29.08	0.87	1.53	0.84	35.24	6.34	36.55	6.79
YDR444W	13.17	8.82	16.31	7.41	37.24	29.74	33.81	27.78	36.06	36.86	25.99	32.81	10.02	1.08	8.5	0.66	19.01	20.43	25.27	2.68	2.61	2.65	18.04	16.99	16.6	20.05	57.93	138.04	149.99	3.61	3.28	3.28	19.34	20.1	26.27	0.61	1.85	0.64	24.88	8.59	27.69	6.43
YDR447C	10.48	8.46	11.11	6.32	13.38	11.73	10.03	12.35	12.65	10.68	9.12	10.48	6.46	4.02	7.73	2.86	12.27	8.59	8.77	6.85	6.47	8.11	15.41	17.65	15.51	19.47	37.29	48.4	39	2.34	2.43	2.62	10.61	9.7	11.75	1.19	1.13	1.23	12.12	3.9	14.33	5.09
YDR448W	14.06	10.11	16.11	8.14	33.82	29.69	29.95	29.55	30.14	31.54	22.46	27.33	7.26	3.75	9.75	2.46	22.31	21.29	21.8	8.57	9.66	9.64	20.12	21.29	15.4	19.91	39.79	98.08	99.85	1.94	2.01	1.79	14.31	14.24	18.41	0.36	1.12	0.37	18.16	12.9	23.46	15.01
YDR449C	21.97	13.96	20.11	11.31	43.85	35.67	35.55	29.41	43.12	38.04	31.59	37.73	7.39	1.15	11.72	1.24	23.1	21.04	22.34	3.98	4.82	4.6	24.92	20.26	23.19	26.39	43.49	111.11	100.9	9.52	8.27	8.22	15.52	16.12	20.52	2.8	4.03	3.68	17.19	1.65	18.11	1.41
YDR450W	13.01	9.92	14.49	7.44	15.49	13.36	13.77	14.42	18.35	14.68	11.42	11.57	9.19	6.1	6.65	2.95	12.61	9.72	10.35	6.62	7.34	7.66	18.4	21.7	17.75	19.88	90.03	63.43	48.88	6.69	6.41	5.19	13.48	14.03	16.63	1.59	1.7	1.85	17.46	4.67	18.13	7.76
YDR451C	8.11	10.76	7.87	8.68	20.96	18.84	15.83	17.31	27.49	24.74	19.14	21.5	8.73	10.3	5.52	4.43	14.53	11.66	11.87	13.18	13.9	15.17	8.29	9.56	6.62	10	27.29	67.37	63.44	3.69	3.72	3.46	9.06	8.38	10.92	1.16	1.48	1.48	16.68	10.97	20.96	21.93
YDR452W	25.42	19.84	30.57	17.68	52.78	45.4	47.67	40.82	45.39	46.91	32.52	42.12	26.52	9.18	17.26	2.95	43.85	40.42	46.31	12.54	12.64	14.5	32.73	31.94	24	28.63	164.16	329.78	390.38	15.86	16.1	14.24	50.58	53.63	67.66	5.4	6.69	4.97	72.38	16.18	78.57	17.01
YDR453C	2.1	1.82	2.06	1.27	3.03	2.88	2.06	2.96	3.88	3.68	3.19	2.1	0.78	0.64	2.02	1.25	5.12	4.29	4.2	6.43	5.17	7.23	1.19	1.88	1.1	1.78	5.79	9	10.64	0.24	0.42	0.19	2.29	2.6	2.65	0.08	0.04	0.15	5.8	2.14	4.51	2.27
YDR454C	5.24	3.31	5.42	2.96	5.61	4.85	4.67	4.27	6.78	5.3	5.35	6.09	3.12	0.9	2.54	0.51	4.32	3.59	3.5	1.14	1.18	1.32	6.81	5.72	5.18	7.55	25.9	23.15	21.5	1.88	1.96	1.83	4.39	5.58	5.06	0.82	0.75	0.82	5.21	0.78	6.15	0.84
YDR456W	8.06	6.92	9.55	6.12	15.12	13.81	12.67	11.94	14.54	15.64	12.02	17.03	5.4	0.88	4.88	0.46	12.72	11.79	12.69	2.53	2.87	2.33	7.37	7.02	5.42	6.89	30.83	40.04	44.05	3.27	3.4	2.8	10.62	10.07	13.08	1.7	1.93	2.01	13.17	2.08	14.07	3.35
YDR457W	89.29	76.17	107.77	65.72	198.11	151.84	179.41	146.44	175.3	182.27	133.4	169.79	68.21	19.47	49.6	8.1	130.35	139.74	151.75	35.68	38.2	39.56	109.32	93.62	83.8	97.52	393.09	725.89	779.02	52.21	51.33	48.72	100.21	101.82	125.87	17	24.78	19.38	126.92	62.86	134.91	55.02
YDR458C	11.56	8.19	14.01	6.84	25.26	20.64	21.28	20	23.08	24.37	19.59	22.17	7.98	1.39	7.83	0.91	20.37	17.68	15.81	2.89	3.48	4.06	14.38	12.37	9.91	11.86	44.64	100.09	108.19	5.08	4.2	4.64	13.53	14.92	18.88	0.99	1.28	1.12	19.75	6.8	21.51	7.39
YDR459C	2.38	1.21	2.05	0.86	4.56	3.7	3.62	3.4	4.81	4.79	3.55	4.1	1.33	0.1	1.13	0.04	2.98	2.61	3.03	0.34	0.3	0.37	2.91	2.33	2.46	2.59	7.58	16.56	18.14	0.63	0.61	0.55	2.38	2.26	2.96	0.18	0.25	0.25	4.16	0.33	4.46	0.65
YDR460W	10.57	6.17	12.47	5.18	20.44	15.16	14.15	14.85	21.72	21.04	15.3	16.66	7.08	0.51	6.48	0.36	13.59	11.2	12.53	1.3	1.28	1.57	14.7	13.99	12.78	16.97	43.41	104.43	110.92	3.82	3.84	3.89	16.72	17.38	21.2	0.96	1.06	0.98	26.77	4.76	28.17	4.68
YDR461C-A	0.8	0.44	0.69	0.32	0.82	0.55	0.81	0.6	0.71	0.72	0.6	0.37	0.5	0.03	0.58	0.03	1.4	0.98	0.61	0.13	0.15	0.13	0.13	0.07	0.07	0.06	7.35	8.04	10.78	0.39	0.36	0.24	2.31	3.05	3.24	0.06	0.07	0.05	3.89	0.04	4.16	0.22
YDR462W	11.63	6.65	10.42	4.57	13.35	15.33	11.97	12.7	20.39	18.78	16.78	13.97	4.67	0.3	5.91	0.22	15.27	9.72	8.75	2.27	2.35	2.14	10.11	8.02	7.77	8.49	22.73	44.7	43.48	1.96	2.28	2.39	15.08	14.47	17.6	0.93	0.99	1.15	18.84	0.39	20.66	0.9
YDR463W	25.95	18.96	28.76	16.49	59.84	50.63	52.45	47.94	60.63	58.2	46.94	50.45	16.93	3.07	14.61	1.44	43.56	38.38	39.77	8.44	8.68	8.61	33.16	31.23	29.9	30.99	85.1	190.3	187.52	14.15	13.61	13.14	35.98	38.56	45.26	5.71	5.85	6.09	44.47	8.76	44.67	13.5
YDR464W	45.07	31.81	49.81	26.67	144.65	117.42	127.05	109.49	120.36	124.52	101.9	118.73	29.03	5.21	26.33	2.39	88.6	88.41	94.53	13.19	13.21	14.91	48.31	32.54	44.43	47.77	173.64	440.33	461.46	11.74	11.38	11.05	68.17	75.81	87.61	4.58	9.28	4.9	82.36	13.61	84.01	14.58
YDR465C	24.9	14.11	24.67	11.73	61.95	48.05	42.97	38.99	57.21	55.61	44.66	56.2	8	0.63	12.76	0.61	30.12	27.52	28.15	1.64	2.66	2.22	26.99	15.25	29.35	30.8	53.38	116.81	108.05	5.72	4.85	5.51	21.45	27.08	29.12	1.96	3.47	2.51	26.01	1.77	21.03	1.48
YDR466W	28.62	22.23	34.45	19.78	89.89	73.34	78.43	66.4	73.87	78.97	60.61	69.93	18.13	2.07	16.3	0.96	54.61	55.46	59.19	9.07	10.2	10.53	30.37	25.35	23.82	26.27	118.18	278.65	293.82	15.67	14.79	15.33	37.15	39.05	49.23	5.14	6.71	5.81	49.17	6.38	52.01	10.25
YDR468C	25.81	12.63	26.71	10.57	36.11	35.22	31.75	31.25	37.55	37.85	29.83	35.47	13.93	1.33	17.52	1.28	30.9	27.4	20.43	4.35	4.87	4.6	41.45	42.27	31.79	46.84	73.65	161.27	153	3.67	3.04	3.09	31.22	34.41	41.9	0.66	1.79	0.87	48.95	6.17	54.33	10.44
YDR469W	6.33	3.56	6.9	3.07	7.14	6.95	4.87	5.95	8.59	7.78	6.42	6.63	3.35	0.3	2.99	0.28	6.44	4.86	4.2	0.91	0.92	0.78	8.18	7.06	7.44	9.69	24.11	47.59	44.82	3.57	3.33	3.47	10.1	11.07	12.15	0.81	1.02	0.78	12.9	0.84	14.48	2.35
YDR470C	5.53	3.96	6.02	3.23	14.09	11.23	12.29	10.77	12.68	11.96	8.9	10.83	3.49	0.48	3.95	0.34	10.51	9.66	10.28	2.27	2.14	2.37	6.39	6.49	5.1	6.43	25.27	54.11	60.78	1.19	1.07	0.93	8.12	8.1	9.54	0.25	0.63	0.31	12.9	4.89	14.33	5.65
YDR471W	32.7	22.84	27.1	19.98	41.43	42.22	36.33	38.3	46.17	40.35	40.49	34.86	22.42	12.84	19.14	7.32	36.15	24.77	24.21	20.41	22.51	21.98	55.19	53.32	42.32	59.35	94.44	109.74	100.9	4.19	4.11	4.37	31.56	29.97	35.93	1.67	2.64	2.1	40.37	7.83	38.84	12.34
YDR472W	16.1	14.3	19.27	14.26	30.26	26.22	24.82	23.26	31.25	31.11	24.18	28.18	4.72	2.48	9.67	4.09	21.39	21.06	19.99	10.16	10.33	10.61	24.63	21.51	20.76	27.07	42.85	88.92	85.57	1.52	1.08	1.12	14.21	16.85	17.84	0.63	0.66	0.49	15.6	3.24	17.81	5.12
YDR473C	14.88	7.11	15.21	5.87	33	27.24	27.6	23.79	28.98	29.38	22.89	26.82	7.55	0.28	9.1	0.27	20.69	18.25	19.14	1.44	1.54	1.92	19.65	17.38	18.88	19.84	53.45	137.24	137.25	2.46	2.29	2.2	21.06	23.59	27.2	0.58	1.11	0.85	29.31	3.63	29.86	4.3
YDR475C	15.58	9.33	19.78	10.17	63.61	47.63	51.12	48.28	47.81	49.38	34.96	41.86	15.96	11.21	11.5	2.19	43.68	40.9	44.08	17.64	16.65	21.18	27.25	25.29	19.28	21.81	79.73	186.04	230.38	2.76	2.42	2.1	28.91	26.59	33.32	0.54	1.05	0.66	36.51	12.68	39.4	15.21
YDR476C	3.33	2.34	2.75	1.66	7.06	5.83	5.71	6.61	11.79	9.56	6.92	6.55	2.38	1.67	2.09	0.61	6.1	4.84	4.88	3.28	2.96	3.52	3.62	3.27	2.85	2.68	19.07	28.06	33.05	0.87	0.73	0.83	8.52	8.89	11.14	0.25	0.4	0.37	19.27	1.04	19.57	1.49
YDR477W	29.83	23.2	30.98	18.22	76.09	65.49	63.38	60.43	73.26	87.58	67.1	81.98	23.48	3.28	20.31	1.64	51.57	54.3	47.39	9.82	10.61	11.07	39.73	40.74	28.13	31.71	99.44	197.69	223.52	7.3	6.74	6.63	39.36	40.95	48.97	5.15	7.5	5.2	50.49	13.78	57.61	18.29
YDR478W	4.91	1.86	4.7	1.96	9.51	10.98	9.36	7.39	12.07	11.83	10.24	11.65	1.42	0.05	2.04	0.06	6.47	5.77	4.5	0.16	0.31	0.11	5.41	3.64	4.25	5.58	12.88	29.91	28.5	0.4	0.28	0.31	6.24	7.72	8.26	0.16	0.22	0.12	6.1	0.89	5.55	0.56
YDR479C	5.21	3.69	6.57	3.73	13.62	11.33	12.76	10.06	14.16	14.89	10.28	12	4.41	0.68	3.36	0.58	10.59	9.22	10.53	2.26	2.65	2.89	8.1	8	6.28	7.55	24.67	45.26	54.83	3.85	3.08	3.12	9.47	8.94	11.42	0.54	1.01	0.68	14.36	5.3	15.54	4.78
YDR480W	17.62	14.48	17.19	12.49	32.87	30.57	27.72	27.3	28.2	30.98	27.3	28.92	5.95	1.52	13.27	6.63	26.16	23.81	19.12	11.62	14.21	15.45	31.49	27.16	23.52	35.51	35.76	97.84	105.18	1.68	1.71	1.64	25.07	27.64	30.14	0.65	1.59	0.69	24.61	3.12	26.41	4.44
YDR481C	12.94	10.71	13.47	10.37	38.24	35.02	34.73	32.58	43.07	42.86	34.78	41.27	8.99	7.29	9.08	4.88	18.74	18.52	17.64	12.93	14.72	16.98	16.34	11.87	15.18	15.46	117.43	219	247.54	8.33	7.78	7.84	30.42	30.43	35.64	0.54	0.83	0.51	47.28	15.23	51.55	17.25
YDR482C	7.5	4.96	7.69	4.16	12.06	11.98	9.42	9.92	13.03	11.11	11.73	9.5	5.82	2.09	5.47	1.38	13.34	8.36	7.72	5.18	5.68	6.99	12.21	10.2	9.09	11.57	16.8	26.93	31.23	0.43	0.49	0.41	10.1	9.58	12.27	0.13	0.18	0.15	17.27	3.33	19.37	4.43
YDR483W	22.3	13.76	22.9	13.69	60.52	52.68	48.83	46.31	52.55	54.74	43.95	54.04	12.32	4.48	13.1	3.67	41.85	38.08	37.7	15.42	16.27	19.07	31.09	27.94	20.58	27.09	87.83	142.46	156.5	5.36	5.49	5.4	22.4	23.01	28.58	1.56	2.27	1.88	31.79	10.69	31.55	11.44
YDR484W	5.34	2.49	4.86	2.05	10.85	9.51	9.07	7.88	8.54	9.83	7.07	9.02	2.43	0.19	2.36	0.14	6.89	7.38	7.23	0.8	0.76	0.97	5.43	5.42	3.58	4.49	16.76	38.27	38.58	1.73	1.42	1.05	4.71	4.31	5.79	0.27	0.41	0.2	7.42	0.8	7.42	1.84
YDR485C	30.36	21.99	33.78	17.31	80.67	64.21	70.31	59.44	77.14	78.79	57.96	65.78	15.06	1.13	18.6	0.91	48.51	48.08	48.96	6.6	7.09	7.79	38.22	28.74	30.83	36.4	115.45	281.22	310.49	14.39	13.97	12.46	39.74	39.18	49.56	3.41	6.44	3.71	47.77	11.69	53.39	13.93
YDR486C	13.64	7.12	12.33	5.96	20.04	19.41	15.92	16.39	22.2	20.96	17.8	20.54	7.17	0.87	9.57	0.96	18.91	16.2	12.32	2.69	3.47	3.17	19.7	18.98	12.63	18.93	44.94	82.57	89.84	2.5	2.51	2.08	14.99	17.66	20.78	0.39	1.07	0.6	23.02	0.78	26.73	2.05
YDR487C	21.1	23.27	22.56	23.47	28.37	26.94	25.14	23.83	38.51	39.69	35.58	38.88	6.52	4.63	16.45	12.67	31.77	25.27	24.09	28.19	26.64	31.95	34.25	30.5	28.34	40.07	44.83	76.46	70.65	2.67	2.7	2.84	23.3	33.78	33.23	0.83	1.59	0.92	21.1	7.14	18.84	8.81
YDR488C	3.69	2.34	3.95	2.23	14.54	13.06	12.47	10.15	12	11.91	8.39	9.29	3.26	0.46	2.47	0.13	7.98	7.29	6.64	1.02	1.03	1.12	3.52	2.91	2.64	3.21	25.31	52.18	47.2	1.85	1.69	1.81	7.56	7.98	9.01	0.42	0.74	0.39	10.07	1.64	11.12	1.22
YDR489W	3.71	2.57	3.99	1.6	13.59	12.91	11.95	12.03	13.61	13.34	11.31	11.79	1.93	0.31	2.44	0.15	7.57	7.84	6.24	1.61	1.49	1.16	4.96	4.48	4.3	5.16	12.36	30.31	30.32	1.08	1.26	0.94	5.39	4.17	5.75	0.35	0.54	0.24	6.23	1.23	6.84	1.44
YDR490C	7.3	5.31	8.38	5.26	16.49	13.78	13.25	12.77	20.36	20.67	12.51	14.93	8.65	1.41	4.28	0.36	13.08	12.52	13.56	2.56	2.48	2.76	6.41	4.16	5.09	5.28	45.28	104.84	121.63	3.44	3.38	2.97	13.29	13.21	17.38	0.44	0.78	0.4	24.29	6.99	26.76	6.17
YDR492W	10.23	9.7	8.65	8.6	43.72	39.32	38.56	37.01	52.67	66.54	51.46	65.3	5.46	5.45	8.25	4.87	16.99	16.11	13.37	8.83	10.27	12.66	11.5	8.8	13.56	16.59	28.37	55.96	53.22	0.7	0.79	0.76	8.07	8.82	11.77	0.2	0.23	0.13	17.33	1.65	17.81	3.14
YDR493W	4.02	1.54	3.85	1.51	2.95	2.88	2.41	2.73	4.99	3.62	3.46	3.35	1.49	0.03	1.68	0.09	3.44	1.75	2.06	0.29	0.44	0.47	4.63	4.41	3.89	5.34	9.52	16.32	17.44	0.68	0.71	0.59	5	4.81	5.06	0.12	0.13	0.13	5.94	0.28	6.05	0.33
YDR494W	27.25	19.19	29.36	15.55	54.44	43.4	41.58	37.86	51.13	50.42	43.5	42.36	15.2	1.35	14.33	1.23	42	31.79	29.87	6.2	6.82	7.92	27.91	26.63	24.2	28.24	63.34	157.9	158.25	6.59	5.81	6.11	28.25	26.88	37.85	1.54	2.89	1.63	39.48	5.69	38.87	8.58
YDR495C	11.83	6.41	12.63	5.41	38.37	29.27	31.6	27.83	28.23	27.51	22.55	26.77	6.93	0.47	7.01	0.25	22.61	21.18	24.63	1.93	2.01	1.92	14.19	12.19	11.11	12.93	55.43	128.23	133.05	6.25	6.29	5.94	16.28	16.52	19.52	2.47	2.72	3.26	21.35	4.7	23.83	4.98
YDR496C	33.08	18.73	31.54	15.11	88.94	65.84	68.6	58.5	79.76	80.76	64.18	76.74	12.52	3.56	14.37	2.7	44.32	44.22	45.26	9.04	10.83	10.92	41.31	30	44.95	47.41	63.31	123.41	110.64	8.3	7.63	8.04	21.23	26.18	25.62	3.59	5.45	3.76	27.82	4.52	19.6	3.24
YDR497C	27.66	34.14	29.31	31.85	44.51	36.2	41.14	36.83	58.37	57.45	45.37	57.9	27.35	41.21	16.41	11.97	33.96	30.49	30.99	30.8	28.28	33.98	34.93	36.19	25.71	36.25	796.92	1589.1	1845.06	21.69	19.06	19.69	122.25	164.85	241.45	2.86	12.03	4.95	364.75	272.78	387.56	339.05
YDR498C	10.4	7.95	11.62	6.28	23.2	20.26	19.86	18.83	26.41	25.04	18.94	21.34	5.77	0.68	6.25	0.48	17.33	15.02	16.12	3.25	3.2	3.39	10.06	9.78	8.66	10.18	35.31	80.4	84.66	3.82	3.64	3.52	15.47	16.17	19.32	1.13	2.01	1.18	15.76	2.18	17.68	3.01
YDR499W	12.17	7.15	12.79	6.32	31.05	23.54	25.17	21.19	22.05	24.16	16.11	22.14	7.35	0.8	7.41	0.51	16.35	15.81	17.85	1.83	2.44	2.01	13.3	11.23	11.6	13.69	53.6	136.19	145.86	3.21	2.83	2.38	15.87	16.2	23.13	0.66	2.09	0.85	21.27	7.6	25.85	6.28
YDR500C	15.51	10.98	13.43	9.82	10.96	9.31	8.06	9.34	11.54	9.08	9.37	10.08	7.9	5.02	8.04	3.61	10.15	6.93	5.84	4.75	5.56	6.11	23.44	24.37	14.45	22.72	47.59	44.22	44.19	3.35	2.99	2.96	10.4	10.24	14.28	1.41	1.6	1.42	12.41	2.94	15.03	5.25
YDR501W	2.2	2.33	2.4	1.72	9.38	9.01	9.36	9.02	7.76	7.56	5.38	6.71	2.32	2.38	1.47	0.82	5.34	6.16	5.65	4.14	4.42	4.47	3.31	3.32	2.08	3.08	6.64	17.12	17.23	0.18	0.21	0.24	2.62	3.07	3.97	0.04	0.13	0.04	4.13	3.24	4.44	5.19
YDR502C	15.47	18.38	13.72	13.97	8.43	6.43	7.54	7.65	11.37	8.76	6.22	7.45	2.62	2.43	6.27	4.69	8.06	7.16	8.63	7.27	6.48	7.4	17.82	13.7	10.98	11.29	144.38	188.85	212.31	4.88	4.28	4.7	35.11	40.95	42.27	0.79	1.51	0.68	41.8	18.44	36.65	12.61
YDR503C	1.57	0.86	2.05	0.89	2.87	2.23	2.26	2.25	3.12	2.48	2.01	2.26	1.48	0.07	0.99	0.04	2.87	1.84	1.83	0.31	0.25	0.24	2.55	2.47	1.38	2.39	5.11	10.05	11.06	0.25	0.2	0.2	1.75	2.12	2	0.06	0.05	0.03	2.54	0.37	3.25	0.63
YDR504C	0.62	0.39	0.84	0.55	0.58	0.83	0.9	0.94	0.68	0.85	0.8	0.8	0.75	0.52	0.42	0.16	0.83	1.07	0.73	0.49	0.42	0.47	0.95	1.16	0.55	1.15	2.2	5.87	6.37	0.18	0.22	0.1	0.85	0.56	1.01	0.03	0.06	0.01	1.08	0.43	1.31	0.89
YDR505C	16.96	13.32	22.44	11.9	63.03	47.8	56.04	49.29	45.41	48.56	36.5	45.26	19.12	10.3	12.38	4.08	44.17	42.15	48.45	20.15	20.57	24.01	30.82	29.58	24.2	30.86	103.28	224.71	248.45	4.47	4.21	3.99	27.4	28.04	34.75	0.56	1.29	0.76	43.37	31.53	45.73	27.48
YDR506C	1.65	0.58	2.24	0.32	9.96	7.4	7.1	5.99	7.36	7.19	4.42	5.56	1.12	0.05	1	0.04	4.72	4.66	5.89	0.19	0.13	0.3	2.04	1.32	1.45	1.57	20.12	42.45	49.16	0.25	0.17	0.21	5.15	5.95	6.38	0.02	0.11	0.02	7.66	0.82	8.35	0.49
YDR507C	27.94	25.37	33.06	27.08	112.46	89	112.26	91.75	67.41	64.22	52.49	61.33	23.94	22.27	17.75	7.97	54.11	57.08	54.92	30.94	36.79	36.39	40.38	35.18	32.74	40.93	137.06	315.47	338.5	9.61	9.05	9.42	39.04	33.83	45.55	1.54	2.81	1.65	52.54	36.2	51.1	26.46
YDR508C	37.95	50.7	38.22	38.92	131.48	104.14	115.66	102.24	113.36	122.2	101.75	122.37	29.5	42.13	27.68	19.98	101.68	104.66	98	87.12	89.19	100.55	39.89	43.51	40.16	51.86	105.9	217.15	261.26	5.74	5.58	5.02	53.79	46.81	59.22	2.12	2.72	2.03	87.25	60.13	88.6	62.45
YDR510W	38.84	33.03	36.68	25.64	56.15	50.98	37.81	46.65	67.46	60.6	56.42	60.03	25.39	13.73	28.33	7.95	57.49	41.33	32.49	35.55	29.61	34.41	66.66	65.3	41.48	66.65	161.59	192.63	220.44	9.61	10.57	10.14	57.12	63.31	70.38	4.75	9.92	4.83	79.58	34.12	90.82	46.33
YDR511W	2.73	1.27	2.58	0.91	3.27	3.05	2.49	2.55	3.98	3.36	3.23	2.82	1.79	0.14	1.68	0.16	3.36	1.8	1.99	0.52	0.66	0.56	5.27	5.49	3.61	5.67	12.99	21.87	20.31	0.74	1.04	0.69	5.32	6	6.91	0.18	0.3	0.23	7.07	0.28	8.02	0.73
YDR512C	18.8	10.07	16.91	8.68	20.86	17.71	13.57	16.74	19.33	21.07	17.44	18.31	6.14	1.36	13.97	3.69	24.14	15.84	12.29	6.56	5.96	6.21	39.49	43.87	27.93	44.81	47.14	73.48	78.22	1.17	1.03	1.24	26.12	26.01	31.43	0.36	0.69	0.32	38.94	3.11	45.75	9.19
YDR513W	25.78	32.51	19.69	24.69	6.48	6.25	5.71	7	6.53	7.75	8.23	7.82	6.67	9.28	18.77	18.16	13.61	10.18	7.23	14.02	14.48	17.09	29.5	43.07	17.87	37.63	50.39	66.81	75.21	1.83	1.98	1.87	25.66	27.76	28.8	0.84	1.13	0.67	29.09	4.43	34.96	19.12
YDR514C	19.22	14.34	23.8	12.21	36.5	27.57	28.56	25.97	34.88	35.05	28	32.01	9.79	0.63	11.32	0.82	24.9	23.11	24.28	3.85	4.23	4.47	29.31	22.79	28.49	35.03	69.17	179.04	178.84	8.18	8.72	8.41	29	33.34	42.15	1.98	4.76	2.66	36.76	7.92	37.71	8.44
YDR515W	13.64	7.5	14.97	6.17	29.1	23.99	23.72	20.41	24.65	25.28	19.47	22.35	5.74	0.31	7.01	0.69	20.23	17.79	18.68	2.58	2.8	3.41	19.33	19.61	16.88	23.19	51.32	129.12	132.7	2.56	2.3	2.73	14.51	15.01	19.89	0.18	0.7	0.35	19.94	3.01	20.03	4.51
YDR516C	5.54	7.29	7.53	7.06	7.24	6	8.09	6.08	7.69	8.82	6.4	5.43	12.04	9.71	4.15	2	6.74	6.2	5.77	6.67	5.54	5.11	6.43	8.28	2.48	5.04	50.05	75.57	88.44	1.07	1.35	0.73	7.24	6.49	9.21	0.11	0.36	0.1	35.57	26.62	37.5	20.34
YDR517W	11.19	9	12.39	6.73	23.62	22.54	18.09	18.94	23.99	26.1	19.94	22.48	9.8	5.14	7.38	1.93	17.37	14.77	12.86	8.32	6.68	7.79	17.51	16.67	10.7	14.98	73.38	127.19	151.81	4.22	4.16	3.94	23.71	24.08	28.21	0.45	0.76	0.31	42.75	8.52	42.85	14.75
YDR518W	2.41	1.59	2.85	1.48	9.51	7.6	7.42	6.64	7.48	9.91	5.96	8.38	3.41	1.5	1.81	0.42	6.23	6.68	6.38	2.09	1.92	2.57	2.8	3.16	2.27	2.47	28.55	47.27	52.66	1.64	1.52	1.56	6.42	7.08	8.51	0.35	0.51	0.27	9.09	0.95	12.03	2.01
YDR519W	3	1.55	3.1	1.44	2.53	2.6	2.12	2.3	3.4	2.93	2.65	2.82	1.45	0.13	1.63	0.08	2.87	2.32	1.78	0.26	0.28	0.26	2.59	2.86	2.05	2.66	18.1	22.67	25.14	0.25	0.24	0.3	3.45	3.89	4.15	0.07	0.2	0.09	5.8	0.69	7.14	1.09
YDR520C	8.67	7.8	9.74	6.12	20.73	17.59	19.25	16.88	18.5	21.36	14.19	19.13	3.47	0.33	4.44	0.28	13.16	13.04	14.41	1.93	1.8	1.83	9.42	6.49	8.67	8.09	31.88	77.82	79.2	4.7	4.51	5.35	8.01	8.03	11.65	1.42	2.06	1.39	8.85	4.18	9.53	4.14
YDR523C	0.23	0.5	0.32	0.48	0.82	0.58	0.41	0.55	1.16	0.88	0.6	0.77	0.29	0.48	0.16	0.18	0.38	0.34	0.49	0.57	0.46	0.5	0.31	0.21	0.16	0.25	0.22	1.29	1.19	2.27	1.88	2.07	0.24	0.19	0.16	0.64	0.82	0.84	0.38	0.24	0.4	0.3
YDR524C	11.06	9.52	12.39	8.74	31.53	28.97	25.75	25.6	31.4	37.05	28.22	34.7	6	3.58	6.41	2.58	19.95	20.93	17.13	8.13	9.76	9.64	16.81	16.78	10.84	15.31	31.69	66.41	69.53	6.17	6.03	4.84	11.46	10.57	12.25	1.65	2.57	1.8	14.71	4.61	16.04	10.52
YDR524C-B	206.37	236.73	174.12	188.58	295.98	251.7	234.99	221.68	231.12	302.1	299.48	335.43	145.32	184.34	162.55	134.73	286.39	187.32	179.43	265.84	293.75	300.36	201.61	224.9	129.73	181.38	455.08	617.44	580.85	32.09	27.57	23.83	143.69	154.75	187.28	20.11	15.59	19.07	256.05	111.67	258.24	188.26
YDR525W-A	2.04	1.59	1.46	1.29	2.45	2.55	2.46	2.48	2.44	2.74	2.25	3.09	1.2	1.05	1.07	0.76	2.98	2	2.04	2.16	2.7	2.74	2.83	3.38	1.35	2.23	4.7	8.76	9.17	0.18	0.12	0.13	1.38	1.44	1.8	0.02	0.09	0.1	3.27	1.65	3.68	3.33
YDR527W	33.75	29.13	38.72	23.54	94.47	85.05	81.47	73.98	80.29	77.7	65.45	71.79	16.76	13.46	20.89	10.05	59.89	50.62	57.06	30.96	30.5	35.92	52.27	37.95	47.18	52.71	80.51	180.89	181.99	2.94	3.01	2.89	36.73	38.97	43.69	0.63	1.03	0.6	44.2	35.27	40	32.97
YDR528W	9.31	12.27	11.36	12.22	39.14	37.25	39.05	36.25	31.2	31.03	23.09	28.44	8.94	14.35	6.74	5.78	28.03	27.06	28.88	29.35	32.03	35.01	11.13	11.22	8.75	9.93	50.17	120.75	125.41	8.13	7.19	7.27	14.63	11.54	19.62	0.78	0.97	0.87	19.89	8.61	22.98	15.94
YDR529C	27.75	31.7	27.91	23.39	37.56	37.55	32.7	32.24	38.56	37.08	33.33	33.1	33.29	33.01	17.97	10.99	48.15	31.61	29.84	44.9	39.22	44.22	41.08	48.86	30.9	47.6	70.73	147.45	151.46	6.61	6.36	6.39	22.33	24.62	28.46	0.99	1.37	0.99	43.5	11.14	47.9	33.75
YDR530C	6.61	3.21	5.8	2.29	13.83	12.51	12.79	12.35	19.58	18.96	13.52	15.73	3.14	0.63	4.26	0.42	10.68	8.86	8.21	1.69	1.97	2.18	7.73	7.07	6.16	8.54	23.37	45.18	53.36	1.46	1.15	1.22	8.4	7.49	8.85	0.2	0.55	0.32	9.58	1.62	10.42	1.97
YDR531W	3.48	1.59	3.47	1.7	7.59	5.73	5.77	5.37	7.79	8.07	6.25	6.52	1.94	0.32	1.96	0.35	4.81	3.73	4.29	1.44	1.14	1.19	4.69	4.12	4.31	5.08	14.45	28.06	28.43	0.89	0.93	0.88	3.82	4.44	4.35	0.08	0.22	0.15	4.45	0.89	4.72	1.19
YDR532C	9.01	5.35	9.95	4.98	18.75	14.61	15.98	13.45	16.96	17.21	13.14	15.22	5.37	0.93	5.77	0.82	13	10.82	11.07	2.55	2.68	2.72	13.59	13.38	12.5	16.22	36.28	87.71	95.16	3.23	2.8	2.71	13.55	15.2	17.07	0.49	1.05	0.66	22.91	1.86	23.2	3.35
YDR533C	21.96	27.65	31.25	30.1	18.46	17.64	20.38	19.54	21.14	20.86	19.9	20.83	7.87	9.89	20.45	18.8	34.45	29.27	25.97	43.42	43.05	45.13	36.5	51.9	22.59	38.15	65.47	125.5	129.68	2.33	2.14	2.56	21.08	39.39	36.23	0.87	1.27	1.29	36.92	34.68	38.66	37.46
YDR534C	0.37	0.34	0.47	0.26	3.42	3.68	2.61	2.66	3.3	3.44	2.21	3.11	0.3	0.04	0.26	0.04	1.77	1.43	1.88	0.44	0.31	0.78	0.19	0.36	0.2	0.33	6.27	8.68	7.63	1.32	1.38	1	12.41	18.73	30.22	0.57	1.83	1.45	47.28	0.33	36.22	0.3
YDR538W	1.85	1.1	2.33	0.98	7.61	6.05	5.74	5.49	6.15	6.66	5.49	6.41	1.11	0.25	1.36	0.11	4.55	3.79	3.78	0.55	0.66	0.91	1.96	1.69	1.63	1.73	7.73	16.32	18.56	0.45	0.59	0.26	2.31	1.88	2.37	0.03	0.09	0.07	2.19	0.15	2.85	0.4
YDR539W	1.87	1.02	2.36	0.7	15.83	13.46	12.67	11.25	13.16	13.24	10.75	11.6	1.13	0.19	0.87	0.12	6.59	6.86	6.29	1.04	1.31	0.97	1.43	1.55	1.61	1.52	14.37	26.37	33.19	1.1	1.11	0.96	2.21	2.44	3.16	0.06	0.16	0.11	4.99	0.71	5.57	0.54
YDR540C	0.59	0.15	0.65	0.16	2.34	1.58	1.22	1.08	2.22	1.86	1.12	1.62	0.3	0.25	0.16	0.06	0.87	0.84	0.68	0.44	0.41	0.5	0.35	0.32	0.29	0.39	8.81	19.21	18.7	0.43	0.37	0.32	1.1	1.19	1.88	0.06	0.11	0.08	3.54	0.43	4.97	1.06
YDR541C	0.86	0.31	0.73	0.33	2.03	1.28	1.94	1.22	2.62	2.61	1.05	1.41	0.34	0.02	0.24	0.02	1.94	1.8	1.55	0.28	0.34	0.15	0.05	0.07	0.05	0.04	9.03	14.95	15.83	0.88	0.52	0.57	2.16	2.05	2.49	0.08	0.18	0.05	2.81	0.15	3.46	0.44
YEL001C	12.94	8.03	13.93	7.28	18.2	15.51	14	13.55	21.98	21.76	18.65	20.36	7.62	1.72	7.95	1.09	14.5	12.07	11.24	3.16	3.06	3.39	17.75	15.85	11.41	15.55	61.85	79.59	84.24	4.1	4	3.74	13.29	15.29	17.74	1.15	1.44	1.05	20.59	3.76	22.65	4.98
YEL002C	7.38	5.63	7.99	4.61	16.43	11.93	12.58	11.66	17.34	15.08	11.09	13.17	5.92	1.25	4.33	0.77	10.95	10.11	12.32	2.37	2.51	2.61	9.77	7.82	7.32	8.72	44.42	65.76	76.33	4.02	3.44	3.09	9.72	10.36	12.29	1.27	1.53	1.24	14.52	3.63	15.13	3.84
YEL003W	7.21	4.09	5.96	3.77	4.37	3.95	4.06	3.88	5.44	4.69	4.26	4.92	3.32	0.59	3.77	0.48	4.61	2.77	2.89	0.88	0.96	0.58	9.53	10.24	7.25	10.85	15.08	20.42	18.28	0.83	0.65	0.6	5.42	5.87	5.91	0.41	0.29	0.38	6.42	1.04	6.2	2.46
YEL004W	1.45	0.5	2.04	0.65	2.69	2.85	1.94	2.27	2.95	2.74	2.52	2.45	0.99	0.04	0.77	0.05	2.15	1.77	2.09	0.34	0.27	0.37	1.33	1.3	0.99	1.08	4.78	9.73	9.94	0.34	0.23	0.32	1.77	2.05	2.15	0.09	0.1	0.05	2.27	0.09	2.55	0.25
YEL005C	2.04	1.02	2.51	1	7.37	5.4	5.65	5.51	6.93	6.74	5.11	5.03	1.64	0.3	1.3	0.11	5.1	3.98	4.11	0.94	0.77	1.01	2.43	1.85	1.5	1.58	9.18	20.5	22.55	0.48	0.47	0.57	3.31	4.14	4.6	0.12	0.15	0.08	4.26	0.35	4.39	0.68
YEL006W	5.62	3.77	5.92	3.07	13.41	10.66	9.89	10.56	10.51	11.85	9.73	10.16	2.63	0.98	3.66	0.78	8.31	7.75	8.26	2.13	2.45	2.55	8.47	7.57	6.4	7.88	19.75	41.73	46.08	1.34	1.24	1.21	7.5	7.75	9.15	0.41	0.81	0.51	8.39	1.19	8.78	1.92
YEL007W	45	87.01	56.81	69.01	123.08	108.81	117.74	110.11	100.71	106.76	79.33	86.8	73.75	147.71	33.95	39.71	107.78	98.07	96.12	118.5	114.97	117.14	54.31	65.46	31.68	39.98	118.14	251.72	285.14	6.74	7.26	7.65	49.75	44.84	63.17	2.56	3.73	2.65	92	34.08	109.89	108.52
YEL009C	26.54	35.77	27.89	30.64	36.58	24.31	32.5	29.87	39.92	31.51	23.47	30.6	33.3	43.97	13.3	11.87	26.44	24.81	36.72	20.66	23.28	24.38	41.95	39.76	40.32	47.41	110.34	221.41	242.14	7.42	6.81	7.33	52.2	53.1	60.62	4.51	7.51	5.24	78.72	55	85.2	81.9
YEL011W	3.15	3.64	4.14	2.56	4.98	4.25	5.39	5.44	3.48	4.5	2.72	3.59	7.58	8.04	3.09	1.89	6.3	4.52	7.88	7.01	6.47	7.77	3.17	5.79	1.57	2.68	23.59	36.98	44.68	0.64	0.67	0.56	2.96	3.31	4.84	0.08	0.15	0.1	13.3	8.03	12.43	9.27
YEL012W	5.54	4.34	6.06	3.65	6.24	6.35	5.94	4.39	7.31	8.36	5.6	5.51	4.97	1.14	4.72	0.64	7.34	5.16	5.35	1.54	1.44	1.49	7.29	8.02	4.28	6.7	18.89	36.98	46.36	1.96	1.82	1.69	10.93	11.43	14.68	0.34	0.84	0.3	17.08	3.09	17.83	4.43
YEL013W	15.18	12.78	17.7	11.55	22.47	17.09	20.9	16.76	21.98	19.87	16.57	18.12	13.97	4.43	8.28	1.71	16.67	14.66	17.24	5.29	5.41	5.35	19.1	20.23	13.48	17.27	60.51	100.41	110.5	9.26	8.88	7.6	18.47	19.1	24.67	3.92	4.35	3.9	27.26	20.14	29.06	15.69
YEL015W	49.94	39.19	48.55	33.26	105.82	86.58	82.37	80.06	99.37	98.55	85.28	91.83	26.61	7.63	31.21	5.3	74.88	66.73	58.89	18.6	20.93	20.32	65.28	57.71	49.18	63.67	130.46	303.49	354.95	15.78	15.19	15.02	54.17	54.22	67.04	7.47	9.82	7.68	65.2	15.04	66.94	21.56
YEL016C	10.27	5.67	10.89	4.87	24.41	20.64	20.12	17.93	20.84	23.84	17.42	20.68	6.68	0.34	5.88	0.31	17.33	16.59	17.08	1.28	1.62	1.73	10.99	9.54	9.06	10.91	31.5	79.67	86.9	2.41	2.13	2.28	14.89	15.64	17.52	0.5	1.15	0.35	16.95	1.51	19.17	2.21
YEL017C-A	33.39	35.52	29.31	31.49	41.88	48.03	42.5	37.98	44.83	56.92	46.49	60.24	22.73	39.39	25.81	19.09	33.47	27.97	18.14	28.2	28.36	27.07	50.64	60.09	20.08	38.53	60.62	87.79	93.2	2.23	2.47	1.92	16.42	19.38	20.88	0.82	0.87	0.96	26.61	24	26.99	25.96
YEL017W	9.58	6.64	9.03	5.9	18.67	16.03	15.63	15.64	19.2	16.33	15.59	14.69	8.76	4.74	6.69	1.47	17.82	15.13	14.26	6.9	7	7.03	9.33	11.27	6.39	8.55	29.26	57	63.65	1.01	0.8	0.79	11.85	12.29	14.7	0.33	0.53	0.4	15.54	5.02	16.6	6.54
YEL018W	15.57	8.85	14.47	6.31	24.23	20.74	16.61	17.93	26.01	25.86	20.23	20.99	7.36	0.27	10.01	0.36	20.03	14.29	12.27	1.7	1.69	1.83	20.61	18.34	13.49	18.03	40.8	96.88	96.07	3.22	2.79	3.17	21.99	22.34	23.88	1.01	1.31	0.84	23.4	2.38	27.29	3.41
YEL019C	3.09	1.89	3.58	1.65	16.67	14.28	11.71	10.7	13.96	15.48	10.82	14.77	1.09	0.06	1.65	0.06	8.49	8.68	8.45	0.57	0.59	0.63	3.5	3.36	3.02	3.39	12.21	32	29.97	0.43	0.44	0.31	4.57	4.68	5.55	0.05	0.2	0.12	3.91	0.28	4.97	0.86
YEL020C	4.21	3.02	5.25	2.55	14.56	11.93	12.41	9.62	11.84	10.95	9.41	10.19	2.95	0.35	2.83	0.15	9.48	9.32	10.44	0.99	1.04	1.08	3.95	3.39	3.89	3.9	14.33	34.97	34.38	0.54	0.56	0.62	4.25	3.82	5.83	0.1	0.25	0.12	5.48	2.06	6.63	1.84
YEL020W-A	2.25	1.17	2.23	1.11	3.56	2.4	1.71	2.89	4.11	3.33	3.06	2.71	1.45	0.26	1.01	0.16	3.25	2.16	1.69	0.97	0.82	1.04	3.68	3.84	3.38	3.39	7.32	9.08	10.29	0.26	0.32	0.32	2.79	3.75	2.9	0.17	0.16	0.05	3.54	0.37	3.83	0.52
YEL022W	33.67	23.43	37.78	22.07	73.46	57.26	63.61	55.24	66.38	65.92	48.85	62.5	22.98	2.26	17.83	0.91	44.21	44.4	50.37	6.73	8.01	7.31	35.59	26.41	27.2	28.76	154.42	293.77	324.14	17.48	16	15.08	45.07	45.98	55.82	6.85	9.34	6.26	55.48	9.2	56.57	8.96
YEL023C	2.4	1.97	3.74	1.99	8.03	5.53	6.84	5.63	7.89	8.34	4.1	5.85	1.47	0.18	1.37	0.11	4.64	4.5	5.26	0.39	0.61	0.39	2.14	1.55	1.65	1.93	10.9	26.61	26.61	0.79	0.84	0.92	3.54	2.54	3.83	0.1	0.25	0.11	4.94	1.25	5.55	1.27
YEL024W	5.4	5.32	5.98	5.13	10.3	10.06	9.34	9.9	6.91	8.82	6.67	7	5.67	5.49	2.93	1.75	12.84	9.93	8.66	10.01	9.63	11	6.86	9.03	3.81	8.67	12.21	25.57	30.81	1.19	1.1	0.97	2.26	2.7	3.5	0.12	0.11	0.07	6.72	2.21	6.94	6.38
YEL025C	8.67	5.09	12.29	5.21	27.21	23.34	24.53	22.5	21.42	25.06	15.39	23.63	6.57	1.53	5.62	0.88	15.48	15.88	18.7	3.33	3.1	4.03	13.24	12.05	11.07	12.63	43.56	94.3	102.94	3.34	2.61	2.67	13.04	11.31	16.18	0.7	0.9	0.56	16.03	6.71	17.45	6.46
YEL026W	23.68	18.65	21.85	16.08	27.63	22.74	19.19	20.76	32.54	27.51	28.06	24.75	11.74	8.19	12.57	5.52	23.07	15.16	15.53	13.26	14.82	15.19	40.22	34.68	25.15	34.92	69.88	83.05	79.27	5.75	5.67	4.42	19.27	19.03	20.23	2.14	2.37	1.8	20.05	2.53	22.85	11.15
YEL027W	18.02	12.75	18.46	11.85	26.84	21.21	19.08	23.19	25.43	24.98	19.9	21.29	9.89	5.71	10.4	3.12	20.61	18.61	20.18	8.28	9.17	8.52	30.11	28.01	24.94	28.78	58.19	62.63	69.88	4.5	4.02	3.27	13.53	13.85	14.76	2.17	2	1.93	16.3	4.48	18.69	4.33
YEL029C	7.44	3.07	7.85	2.48	18.2	15.58	13.89	13.06	16.53	17.47	13.38	19.18	2.97	0.18	4.39	0.24	10.65	10.09	9.08	0.63	0.82	0.84	10.19	8.57	11.08	12.02	28.07	74.85	67.22	2.37	2.14	2.26	12.27	13.03	17.01	0.79	1.02	0.83	15.65	1.21	18.46	1.44
YEL030W	1.34	0.71	1.71	0.74	7.4	7.35	6.38	5.58	5.77	5.91	4.13	4.84	1.24	0.12	0.92	0.03	4.25	4.84	4.95	0.19	0.38	0.41	1.32	0.94	1.08	0.93	8.25	17.53	25.42	0.22	0.19	0.17	2.09	1.7	2.73	0.03	0.1	0.03	3	0.5	3.53	0.6
YEL031W	15.18	11.16	18.27	10.83	47.96	32.09	43.2	32.92	43.72	42	30.05	35.2	13.94	3.83	8.37	1.19	28.99	27.36	34.96	8.11	9.04	9.79	19.65	13.94	16.25	17.18	89.99	143.51	149.15	6.66	6.43	6.21	19.89	20.89	22.7	2.29	3.38	2.31	26.88	13.42	28.05	9.52
YEL032W	28.58	19.23	35.02	18.01	116.1	89.8	93.1	82.49	101.36	110.83	80.35	98.93	18.35	6.99	17.62	4.02	65.67	62.28	62.55	19.81	22.23	25.76	46.4	38.23	34.27	42.59	120.6	277.45	298.65	5.86	5.91	6.18	39.11	34.69	44.96	1.09	2.09	1.01	53.03	24.71	57.93	24.18
YEL033W	8.23	8.27	5.24	6.19	3.92	5.13	4.55	3.65	4.28	4.63	5.53	6.33	4.11	6.74	5.9	4.79	5.02	5	2.93	6.88	6.65	7.59	6.83	9.4	2.66	5.61	9.93	10.93	8.82	0.56	0.64	0.56	4.01	2.95	4.11	0.46	0.1	0.29	4.67	1.17	8.05	6.5
YEL034W	46.72	52.26	46.96	45.16	46.8	43.13	45.9	44.84	50.38	49.91	48.03	48.24	38.81	44.56	31.29	24.92	57.7	45.49	38.15	62.51	61.8	65.24	41.85	52.99	30.21	43.04	105.82	140.13	132.56	7.97	7.29	6.86	23.47	26.2	29.35	1.61	1.53	1.35	46.15	50.07	48.17	48.75
YEL036C	38.78	30.07	39.55	24.05	122.42	98.13	98.29	92.25	124.8	126.84	97.8	105.77	24.22	9.37	25.49	5.52	92.87	78.46	90.54	34.17	31.99	37.95	53.23	49.7	47.98	57.35	134.94	328.01	348.09	12.26	12.75	13.55	60.52	62.31	68.23	3.57	6.41	3.52	76.32	19.5	80.96	31.41
YEL037C	40.96	21.94	44.29	18.72	103.66	86	77.01	69.8	107.69	107.82	81.09	87.44	25.45	4.48	23.54	2.61	80.52	70.51	66.33	15.22	14.07	15.94	58.97	50.83	46.27	50.98	145.39	288.54	295.71	5.28	5.37	5.23	53.44	55.5	65.8	1.19	2.27	0.98	74.16	12.72	74.25	13.71
YEL038W	2.92	1.91	2.82	1.43	2.98	2.28	2.09	2.55	3.23	3.33	3.19	2.63	1.47	0.17	1.18	0.05	2.98	2.64	2.35	0.26	0.45	0.26	1.64	1.17	0.88	1	6.53	9.33	10.08	0.71	0.37	0.52	2.4	3.09	3.56	0.16	0.12	0.11	2.37	0.35	3.3	0.54
YEL039C	1.06	0.74	1.16	0.81	1	0.75	0.67	0.87	0.5	0.69	0.45	0.19	4.61	4.74	1.38	0.66	1.96	1.5	1.5	1.83	1.8	1.96	0.77	1.88	0.35	0.76	9.44	16.24	22.13	0.99	1.17	0.91	1.6	1.12	2.27	0.04	0.01	0.04	8.39	0.71	11.6	3.41
YEL040W	37.96	51.33	47.53	45.51	112.7	91.4	103.36	92.6	193.37	176.41	146.54	161.3	44.68	53.31	19.48	14.36	74.88	73.19	65.97	59.1	60.32	59.61	51.83	48.99	39.26	47.02	311.27	671.06	715.44	17.99	17.4	18.35	85.9	90.81	113.9	7.35	8.02	7.48	139.06	51.19	147.27	76.55
YEL041W	0.99	0.51	1.04	0.47	2.05	1.9	1.91	1.68	2.14	1.94	1.2	1.09	0.79	0.03	0.56	0.02	2.21	1.77	1.57	0.19	0.18	0.26	0.63	0.44	0.36	0.39	1.98	4.02	6.93	0.12	0.08	0.18	1.63	1.35	2.21	0.02	0.15	0.09	2.48	0.15	2.47	0.14
YEL042W	14.09	11.46	13.72	9.31	47.86	40.97	45.29	36.9	37.7	41.98	32.15	37.39	9.09	5.29	8.19	3.09	30.96	30.38	28.76	14.39	13	14.24	18.75	18.49	14.89	19.75	60.58	112.39	119.95	3.35	2.95	2.85	17.29	18.19	20.72	1.26	2.3	1.09	21.08	16.96	22.78	19.12
YEL043W	36.44	25.68	39.28	22.67	117.47	91.6	92.87	80.27	104.26	108.17	81.04	93.74	21.88	7.36	20.33	3.9	76.88	74.73	75.41	22.26	21.66	22.44	46.05	38.09	35.89	41.02	112.13	251.48	268.05	14.56	13.05	12.81	44.11	47.07	52.86	5.2	7.41	4.96	46.96	8.85	51.15	12.71
YEL044W	8.26	9.68	8.95	7.81	13.48	10.76	8.55	9.8	16.41	12.79	13.81	11.76	5.39	6	6.55	4.25	13.87	7.93	8.23	13.37	12.28	14.56	14.99	16.12	10.83	15.88	23.33	44.38	46.43	0.74	0.71	0.78	13.63	13.12	14.68	0.4	0.47	0.33	26.53	12.23	30.57	29.68
YEL046C	102.94	140.01	124.58	131.82	303.83	232.14	287.53	249.41	256.43	250.27	233.61	260.5	43.91	56.15	64.99	53.98	273.01	258.98	282.92	249	267.4	295.57	112.81	103.86	114.54	128.33	209.63	437.03	433.24	6.19	5.01	5.39	128.14	125.13	141.77	3.62	6.77	2.48	136.09	116.3	146.44	84.82
YEL047C	9.41	10.58	11.47	10.32	28.52	22.79	20.12	20.62	30.34	33.03	26.97	30.36	5.59	4.43	6.34	3.65	18.14	17.25	14.92	11.12	11.24	11.74	15.09	12.76	11.14	13.93	33.18	44.38	42.57	3.38	3.15	2.75	10.25	10.94	11.91	0.84	0.95	0.93	12.31	4.7	11.65	3.71
YEL048C	1.55	0.78	1.34	0.55	1.63	1.3	1.51	0.99	1.34	1.39	1.52	1.73	0.38	0.06	0.7	0.04	1.13	0.91	0.7	0.11	0.21	0.22	1.59	1.3	1.24	1.29	1.94	5.23	4.62	0.3	0.36	0.38	1.04	1.12	1.38	0.13	0.22	0.16	1.11	0.2	1.36	0.29
YEL050C	17.25	9.32	18.68	7.43	27.68	26.67	24.27	20.96	29.44	30.47	22.82	25.2	10.69	0.88	9.09	0.56	23.29	18.84	17.17	2.76	2.86	3.19	23.3	20.32	17.56	23.91	49.94	123.57	138.44	4.61	4.05	3.47	23.83	24.5	30.52	0.97	1.67	1.23	31.76	6.36	34.02	6.9
YEL051W	7.12	4.17	7.76	3.57	10.32	8.4	8.18	6.7	13.99	12.25	9.79	8.99	5.62	0.5	3.45	0.2	8.68	5.54	6.8	1.38	1.23	1.34	7.57	5.31	6.8	5.98	45.39	54.19	56.44	3.04	2.5	2.47	11.32	13.52	15.31	1.11	1.21	1.28	14.03	1.99	14.55	1.43
YEL052W	11.39	9.36	14.12	8.83	18.3	14.81	14.7	14.44	15.05	16.11	12.31	14.93	3.01	0.55	6.45	2.18	13.34	11.86	14.03	3.98	4.66	5	16.53	13.7	14.55	17.33	37.96	71.23	74.02	2.85	2.08	2.3	22.49	22.45	24.44	0.65	1.13	0.7	18.19	4.44	18.69	4.17
YEL053C	17.71	10.63	20.42	8.84	41.46	30.62	33.69	27.3	31.3	32.15	25.54	33.07	5.75	0.41	9.41	1.86	19.38	22.24	24.82	3.34	3.3	4.51	20.84	16.71	21.43	22.6	60.17	145.03	149.15	5.02	4.41	4.4	24.87	27.06	27.36	0.81	1.71	0.79	28.04	4.11	28.17	4.47
YEL054C	27.26	21.06	25.76	19.02	36.71	31.52	32.24	29.48	31.98	31.94	27.91	30.36	16.99	10.54	15.38	6.26	28.29	23.7	18.75	15.5	16.73	18.85	43.7	41.49	28.55	44.66	96.6	115.77	124.36	4.93	4.35	3.97	25.85	28.32	32.44	2.09	2.85	2.02	33.79	12.33	35.51	11.79
YEL055C	21.62	9.35	25.88	9.97	62.95	40.2	45.81	40.94	55.42	48.85	41	48.37	11.65	1.36	9.99	0.54	29.16	29.27	32.68	2.13	2.89	2.27	28.92	21.13	29.39	28.11	76.44	148.01	145.44	8.14	7.46	8.07	21.5	24.76	28.15	3.32	3.95	4.08	28.25	2.45	23.99	1.19
YEL056W	16.47	10.26	16.69	9.19	31.97	30.67	29.05	26.91	31.45	33.51	26.43	30.84	7.67	0.65	10.1	0.64	25.48	26.13	22.22	4.67	5.03	5.93	20.79	19.23	15.51	21.09	46.58	95.43	109.59	3.15	3.16	2.73	22.08	23.96	26.77	1.33	2.08	1.2	22.8	3.12	27.54	4.63
YEL057C	0.14	0.03	0.13	0.02	0.92	1.13	0.72	0.51	0.81	0.91	0.49	0.82	0.04	0.01	0.05	0.01	0.47	0.39	0.38	0.03	0.07	0.02	0.1	0.11	0.1	0.06	0.63	1.53	1.47	0.13	0.06	0.12	0.07	0.07	0.1	0.08	0.01	0.09	0.35	0.04	0.35	0.14
YEL058W	5.77	3.42	6.65	3.27	10.67	8.86	9.07	7.51	11.62	12.04	8.12	7.96	3.4	0.26	2.78	0.14	8.47	8.2	7.67	1.23	0.9	0.86	5.8	5.01	4.69	6.08	38.04	57.24	55.67	2.3	2.27	2.44	7.34	7.98	8.26	0.57	0.63	0.38	8.15	3.77	10.21	1.97
YEL059C-A	1.57	1.04	1.31	0.85	1.9	2.15	1.36	1.47	2.47	2.4	1.78	1.73	0.52	0.33	0.65	0.24	2.38	1.59	1.55	0.91	0.9	0.78	0.4	0.28	0.27	0.3	8.7	8.52	8.19	0.45	0.39	0.41	1.87	1.84	2.01	0.09	0.1	0.09	3.91	0.17	5.07	0.67
YEL060C	28.62	37.57	36.15	36.9	83.6	65.69	74.34	70.65	67.64	82.3	59.12	67.24	37.94	45.26	26.5	17.8	96.21	78.73	82.44	113.23	95.62	118.76	32.29	40.93	20.02	28.87	145.2	224.95	246.48	4.05	4.39	3.41	50.02	48.47	58.31	1.07	2.09	0.91	84.76	63.14	97.38	83.05
YEL061C	32.39	22.45	33.14	19.44	81.49	67.49	72.17	67.64	62.17	62.38	52.8	65.83	19.05	2.92	22.59	2	47.64	43.51	45.14	9.22	9.93	10.33	41.08	39.49	32.42	41.74	108.25	276.32	286.12	6.72	6.18	6.41	46.6	45.58	57.56	3.79	7.54	4.22	50.76	7.83	57.13	13.45
YEL062W	4.9	2.49	5.72	2.27	18.25	16.68	14.96	14.46	14.94	18.14	12.22	15.46	3.15	0.28	2.96	0.18	10.42	11.25	10.25	1.36	1.42	1.79	6.39	6.31	5.25	6.59	20.01	48.32	51.19	1.87	1.78	1.55	6.83	5.12	7.49	0.2	0.47	0.2	8.58	1.12	10.16	1.84
YEL063C	21.59	20.19	21.29	16.33	68.21	57.91	62.95	56.66	63.36	65.04	62.04	74.32	17.07	16.04	17.83	7.99	41.43	39.92	37.35	26.38	28.33	32.66	29.88	29.38	26.75	32.82	64.57	123.81	152.3	5.69	5.5	5.21	25.66	21.48	28.15	1.77	2.4	1.52	33.57	33.5	35.29	40.61
YEL064C	1.41	0.73	2	0.74	4.87	3.58	4.75	3.4	3.2	4	2.52	3.43	0.72	0.03	0.94	0.02	2.08	1.48	2.46	0.1	0.11	0.15	1.32	0.96	1.12	1.35	7.76	16.56	19.68	0.35	0.21	0.27	1.77	2.02	3.1	0.01	0.07	0.02	3.7	0.33	4.06	0.56
YEL065W	6.38	4.97	7.79	5.39	20.12	15.11	19.48	15.52	30.04	22.13	21.95	23.74	7.38	4.07	3.58	1.64	13.21	12.86	14.76	6.95	8.27	7.79	6.65	2.63	4.19	2.65	119	161.6	220.65	12.87	8.54	10.2	60.29	60.05	83.81	4.33	6.06	4.27	94.48	7.1	85.48	5.77
YEL066W	1.91	0.94	1.77	0.86	4.21	3.53	2.81	2.46	4.01	4.16	2.74	3.7	1.04	0.26	0.94	0.15	3.13	2.41	1.97	0.86	0.56	0.93	1.77	1.08	1.27	1.41	9.41	9	13.58	0.31	0.33	0.34	3.14	3.56	4.52	0.1	0.17	0.1	5.56	0.41	5.62	0.6
YEL067C	0.69	0.18	0.57	0.22	3.03	1.35	1.77	1.74	2.24	1.86	1.76	1.65	0.29	0.02	0.52	0.01	1.62	1.43	1.17	0.15	0.13	0.11	0.43	0.5	0.54	0.75	2.5	6.27	6.65	0.16	0.21	0.18	1.1	1.16	2.03	0.03	0.04	0.03	1.48	0.07	1.94	0.17
YEL068C	0.89	0.32	1	0.27	1.82	1.58	1.68	1.4	3.15	2.37	1.67	1.73	0.48	0.03	0.34	0.01	1.21	1.27	0.84	0.13	0.17	0.09	0.47	0.44	0.46	0.48	3.81	8.76	8.82	0.17	0.14	0.2	1.09	1.1	1.44	0.01	0.07	0.05	1.51	0.02	2.07	0.05
YEL071W	40.07	45.58	39.07	33.99	64.37	55.53	59.09	55.63	60.41	53.78	41.34	49.31	13.35	18.07	20.37	15.46	42.92	39.35	47.51	37.76	31.85	39.74	48.72	35.6	45.36	45.51	202.87	345.22	405.51	15.22	14.74	12.39	111.07	116.76	117.87	10.37	15.97	9.86	104.95	46.11	99.22	32.75
YEL072W	3.39	2.52	2.6	1.34	3.42	3.6	2.26	2.8	4.03	4.13	2.94	3.96	0.51	0.24	1.66	0.7	3.13	2.57	2.25	2.08	1.85	1.88	4.74	4.44	4.36	4.95	4.93	10.93	11.41	1.57	1.74	1.57	1.77	1.49	1.9	0.62	0.49	0.52	1.84	0.61	1.72	1.25
YEL077C	1.09	0.65	1.65	0.79	7.03	5.45	7.28	4.64	5.12	4.58	2.99	4.12	1.31	0.37	0.75	0.09	2.91	3.36	3.71	0.5	0.49	0.65	2.02	1.67	1.66	1.73	10.12	25.73	30.39	0.72	0.57	0.57	3.18	2.16	3.81	0.08	0.24	0.16	4.29	1.95	4.62	1.55
YER001W	12.77	14.07	16.68	14.46	56.68	45.43	58.63	51.15	51.01	47.06	36.32	41.72	18.23	18.46	8.12	4.88	23.84	24.33	27.61	19.49	19.34	21.94	13	10.34	11.76	12.23	74.21	150.9	164	3.15	2.57	2.96	9.77	9.56	11.54	0.08	0.14	0.08	22.48	16.64	24.84	17.28
YER002W	58.41	47.86	55.21	35.72	76.8	63.44	57.78	59.76	82.08	80.97	72.79	78.92	24.56	12.85	32.5	11.33	55.91	44.6	41.67	21.27	24.27	26.62	79.56	65.69	73.66	98.28	109.93	238.86	243.96	8.9	9.44	8.06	47.81	54.07	58.49	3.53	4.9	3.64	58.53	19.02	52.56	16.28
YER003C	12.48	10.6	11.89	10.49	31.1	31.82	31.43	28.88	22.91	24.37	20.61	25.09	10.58	12.19	9.3	4.99	24.25	22.7	19.05	19.1	18.51	22.28	15.76	15.25	9.05	12.99	66.18	89.32	91.1	4.14	4.3	4.11	13.8	12.17	15.39	0.74	0.57	0.74	19.21	6.1	24.06	10.03
YER004W	10.5	6.59	9.42	5.83	16.94	14.96	13.4	13.52	17.36	17.9	14.43	15.54	5.31	0.79	7.67	0.54	14.63	13.56	10.25	2.5	2.44	2.7	13.67	12.21	8.64	11.95	31.8	49.52	55.74	1.92	1.69	1.6	10.52	11.63	13.87	0.54	1.14	0.74	14.33	2.05	16.32	2.71
YER005W	7.5	4.65	8.11	4.13	19.73	16.31	16.21	14.65	19.73	20.72	14.7	18.68	4.79	0.78	5.37	0.55	13.06	12.29	11.1	2.22	2.63	2.65	9.54	8.55	7.55	10.47	24.75	45.42	52.94	2.11	1.8	2.26	9.13	9.84	10.69	0.75	1.01	0.73	10.44	2.79	9.79	2.11
YER006W	25.32	13.86	24.13	11.21	57.94	47.35	49.81	38.82	69.98	65.36	55.37	61.63	9.8	1.54	11.53	1.04	30.62	30.02	28.88	3.31	3.94	3.88	31.84	18.68	30.69	31.96	56.85	119.95	110.43	4.51	4.59	4.5	20.6	26.67	27.32	2.51	3.29	2.74	22.8	3.35	18.34	1.67
YER007C-A	5.06	2.49	5.21	2.23	9.72	8.38	7.31	7.16	11.47	11.08	8.25	9.1	2.73	0.28	2.73	0.21	6.59	4.91	4.29	0.75	0.92	0.95	7.63	6.72	6.72	7.77	21.95	32.4	38.79	1.13	1.27	1.08	7.99	9.36	10.55	0.54	0.64	0.4	8.5	0.59	9.66	1
YER007W	2.76	0.47	2.79	0.43	9.9	6.68	5.71	6.29	6.53	7.75	5.31	6.2	0.69	0.01	1.42	0.01	4.04	4.14	3.45	0.1	0.1	0.09	2.47	1.78	2.21	2.21	7.24	17.2	18.14	0.16	0.13	0.18	2.69	2.46	3.75	0.05	0.06	0.04	4.21	0.24	4.67	0.13
YER008C	44.61	26.53	53.36	22.8	151.02	106.59	130.12	100.72	120.01	129	94.76	114.31	33.78	2.95	25.13	1.46	84.82	84.46	90.63	10.29	11.89	12.23	58.52	47.4	46.43	49.23	180.66	452.87	463.84	16.55	14.55	15.07	57.4	60.94	73.62	3.89	7.02	4.53	83.12	13.81	86.46	14.04
YER009W	4.42	2.53	4.26	2.46	4.71	4.1	3.97	3.38	5.59	5.3	4.82	4.95	2.39	0.38	2.19	0.36	3.4	2.93	1.95	0.58	0.77	0.86	6.25	5.63	4.02	5.79	18.66	16.4	16.53	1.77	1.62	1.64	3.81	3.89	4.41	0.75	0.44	0.68	4.91	0.73	4.51	0.82
YER010C	4.39	2.34	4.12	2.11	10.01	9.21	8	8.66	11.77	12.33	9.73	8.97	3.08	0.31	3.39	0.2	8.89	6.88	4.83	1.25	0.93	1.08	4.35	4.62	2.55	3.96	17.84	32.08	32.35	0.84	0.82	1.01	7.46	6.73	9.01	0.18	0.26	0.15	9.09	0.22	10.19	0.81
YER011W	1.9	1.68	1.42	1.38	5.06	5.1	5.36	3.81	10.96	13.45	8.59	10.56	3.27	2.12	1.5	0.58	3.74	5.45	4.13	2.13	2.25	2.55	0.27	0.44	0.17	0.25	4.37	3.86	2.38	0.95	0.92	1.12	0.19	0.25	0.28	0.04	0.04	0.05	0.67	0.24	0.58	0.27
YER012W	28.51	16.16	30.96	13.14	32.47	26.72	22.18	24.38	31.93	31.3	25.43	27.78	17.98	1.82	18.27	1.32	27.31	19.06	19	3.78	4.24	3.93	46.06	44.44	27.82	43.62	80.18	129.92	143.06	3.96	4.03	3.56	31.78	33.23	37.99	1.39	2.85	1.18	40.78	5.06	42.15	9.55
YER013W	17.44	12.42	21.46	9.7	51.6	41.5	49.06	39.1	48.36	48.13	35.38	41.46	9.63	1.3	9.34	0.69	31.8	30.83	35.29	4.71	4.56	5.29	19.01	14.66	15.2	15.35	73.27	190.86	187.94	6.28	6.1	5.87	21.69	21.24	25.32	1.72	2.92	1.5	28.2	5.3	30.49	6.24
YER014W	3.94	1.71	5.07	1.49	11.11	9.78	9.22	7.62	10.43	11.53	8.1	9.15	3.59	0.42	2.45	0.15	8.61	7.04	7.04	1.01	0.79	1.01	2.8	1.62	2.06	1.87	23.48	46.87	47.2	0.85	0.73	0.77	6.9	6.73	10.17	0.12	0.18	0.1	11.04	1.13	11.68	1.43
YER015W	2	1.19	1.78	0.92	5.06	5.03	4.81	3.97	5.37	5.73	3.95	4.6	0.78	0.18	1.03	0.1	3.4	3.73	3.57	0.58	0.56	0.52	1.67	1.37	1.34	1.38	10.38	21.39	22.55	0.57	0.63	0.67	2.14	2.07	3.18	0.06	0.08	0.05	3.75	0.97	3.46	1.08
YER016W	18.02	10.65	21.39	9.04	39.14	29.62	30.97	29.92	33.85	32.47	24.83	27.25	12.43	0.66	12.31	0.36	29.92	24.95	24.54	2.52	3.48	2.78	24.39	22.98	17.23	22.1	69.02	151.38	171.14	3.89	3.48	3.96	25	26.13	32.14	0.75	1.54	0.74	33	7.38	38.56	7.46
YER017C	14.06	11.45	15.92	9.79	34.77	29.79	31.11	26.95	35.26	36.44	26.41	30.28	10.95	4.13	9.05	1.78	27.24	23.54	26.53	9.12	8.49	9.86	16.23	14.02	13.1	16.49	60.02	132.33	145.72	8.11	8.14	7.27	20.31	22.11	25.72	2.74	3.37	2.88	30.44	8.57	29.41	8.33
YER018C	5.44	3.45	4.4	2.84	7.64	8.05	7.1	6.98	10.76	10.12	9.75	8.17	3.93	0.8	4.46	0.53	8.8	5.45	4.53	2.26	2.3	1.81	5.75	6.49	3.64	5.59	10.86	20.1	20.52	0.86	0.82	0.72	7.87	7.75	8.63	0.41	0.44	0.47	9.36	0.58	11.07	1.86
YER019C-A	6.89	6.1	7.72	4.97	5.87	4.25	3.51	4.25	7.56	5.14	5.8	4.9	4.21	2.13	3.73	2.16	5.4	3.73	3.85	3.26	3.27	4.23	11.39	11.13	9.32	13.14	23.81	30.87	31.02	1.26	0.92	1.08	7.17	7.72	8.51	0.47	0.46	0.42	11.33	4.98	10.95	8.08
YER019W	7.93	6.21	9.27	5.53	24.31	26.19	22.67	19.86	32.91	30.82	26.01	22.94	7.15	3.23	5.87	1.58	20.93	19.25	17.71	9.07	7.78	8.56	10.54	9.47	9.44	10.39	34.6	83.21	81.51	2.12	1.86	2.17	17.51	18.19	19.32	0.44	0.76	0.47	19.51	5.06	20.48	4.73
YER020W	25.55	22.64	32.75	21.24	58.05	50.23	48.22	46.59	57.99	60.06	46.38	48.64	22.93	19.2	21.57	10.02	55.06	41.88	44.2	39.38	36.22	42.82	44.01	43.51	28.95	39.14	82.04	178.56	194.25	4.49	4.27	3.91	47.2	45.14	56.34	0.89	1.46	0.71	64.55	24.39	69.94	26.45
YER021W	30.52	19.38	35.79	16.54	56.68	41.07	48.94	42.77	54.01	53.32	43.34	47.52	20.45	6.3	16.84	2.94	41.47	38.85	41.67	11.65	11.83	13.76	46.42	41.75	34.56	41.16	125.79	236.36	220.93	8.39	7.62	7.1	34.91	35.83	43.89	2.34	3.91	2.29	44.96	27.7	48.5	23.69
YER022W	9.98	6.59	11.55	5.66	23.6	19.06	21.46	17.98	19.78	20.83	15.24	19.48	6.37	0.41	5.64	0.28	14.31	13.63	13.68	1.7	2.03	1.77	14.07	14.72	11.95	15.86	45.31	101.46	107	3.9	3.36	3.28	12.87	13.66	16.89	0.78	1.11	0.71	17	5.78	18.34	4.52
YER023W	3.3	2.83	4.17	2.35	6.98	5.1	6.18	4.98	8.57	6.71	5.47	5.93	4.06	0.45	1.89	0.15	5.27	3.73	5.21	0.89	0.97	0.8	4.21	3.2	3.85	3.29	40.98	45.75	44.75	2.85	2.74	2.54	8.72	10.14	10.81	1.18	1.4	1.16	11.33	3.61	12.46	2
YER024W	4.34	4.23	3.7	2.89	16.04	13.43	15.51	14.21	12.5	15.26	10.8	14.13	1.9	1.32	2.66	1.02	8.32	8.02	9.9	6.25	4.27	7.27	4.34	3.79	5.52	6.79	22.69	56.76	63.72	8.5	7.59	7.67	9.2	10.29	9.5	2.12	1.9	2.17	9.77	4.74	10.47	3.9
YER025W	179.76	138.63	186.87	115.46	335.15	268.86	256.56	253.61	289.51	315.42	282.97	317.42	85.01	35.68	118.86	23.61	244.04	219.63	167.35	66.47	78.59	81.16	216.5	189.56	161.1	215.39	353.03	679.18	692.68	29.77	28.7	28.25	127.3	139.47	165.36	14.03	21.16	15.53	152.47	28.93	160.01	35.38
YER026C	3.79	2.95	4.28	2.77	5.66	4.45	5.02	4.73	7.51	7.43	4.91	6.71	3.94	2.63	2.07	1	4.98	4.36	4.74	2.47	2.52	2.57	5	5.55	4.15	5.2	93.02	154.12	154.4	2.85	2.38	1.91	15.6	22.06	27.14	0.26	0.89	0.4	39.16	15.97	42.42	20.4
YER027C	11.26	6.3	13.71	5.03	23.62	18.21	21.08	17.5	24.22	23.28	16.91	18.89	10.58	0.68	6.35	0.33	17.5	13.95	16.75	1.82	2.25	2.01	12.89	12.37	9.53	11.08	61.96	121.88	132.91	3.2	3.2	2.88	18.42	20.22	25.64	0.73	1.04	1.05	28.74	4.57	31.93	4.19
YER028C	1.68	2.73	1.85	2.52	11.75	12.71	11.34	11.18	14.31	16.09	12.45	14.74	1.15	2.75	2.52	2.38	5.17	5.27	4.11	5.18	5.78	7.25	1.96	1.88	2.52	3.38	8.92	17.45	19.82	0.81	0.87	0.67	4.67	4.59	4.15	0.59	0.37	0.59	5.05	4.22	4.64	3.3
YER029C	17.31	13.67	16.29	10.53	23.2	21.81	17.02	18.28	36.57	35.24	26.1	23.47	7.74	0.84	9.63	0.68	18.84	14.59	12.69	2.71	3.2	2.57	18.4	14.25	15.52	16.71	47.11	90.36	86.27	3.56	4.06	3.22	25.34	28.04	32.08	1.77	1.81	1.53	29.74	5.97	30.64	7.22
YER030W	27.94	15.14	29.04	11.25	39.35	36.37	31.05	31.25	37.93	39.23	31.5	32.09	15.11	2.15	16.14	1.78	36.24	27.04	22.92	4.3	5.09	5.18	36.12	39.67	31.75	46.75	114.89	153.88	152.93	5.87	5.53	5.55	35.68	38.58	45.33	1.85	3.76	2.06	56.75	9.52	61.72	9.3
YER031C	15.97	10.41	14.92	9.12	17.62	17.86	16.18	15.2	24.14	22.08	21.04	19.58	9.85	2.38	9.78	1.21	15.5	15.22	10.04	3.62	3.99	3.99	22.51	23.53	14.79	20.53	57.15	78.31	91.73	3.15	3.45	3.63	16.47	19.73	21.91	1.7	1.69	1.52	24.77	3.63	24.74	6.01
YER032W	24.69	16.17	23.35	11.67	100.98	79.92	88.58	77.37	87.17	89.44	69.11	79	16.47	1.73	15.69	0.87	59.57	60.71	58.04	7.45	8.34	7.46	29.56	24.17	20.8	22.37	92.05	248.26	262.1	5.66	5.13	5.21	33.94	36.85	44.52	2.24	4.63	2.23	41.64	4.61	51.93	8.31
YER033C	10.05	5.49	12.77	5.31	53.62	43.53	44.27	37.31	41	45.63	28.44	36	12.26	3.93	6.49	0.85	36.16	35.79	36.83	7.66	8.18	8.5	11.75	11.25	8.38	9	57.18	139.16	175.97	4.05	3.72	3.37	16.06	13.75	20.17	0.32	0.77	0.41	25.8	10.5	30.75	12.01
YER034W	5.83	3.11	5.98	2.41	14.46	11.48	10.18	11.53	16.33	14.46	13.56	12.37	3.39	0.58	3.12	0.35	13.53	9.41	8.42	1.82	2.03	1.9	9.5	8.99	6.78	7.65	24.64	51.45	55.95	1.22	1.23	1.32	14	15.66	18.02	0.33	0.63	0.41	18.86	1.62	20.88	2.84
YER035W	42.54	46.03	45.36	39.13	43.69	43.75	35.58	36.62	43.25	45.41	40.31	40.63	39.65	51.19	31.61	18.95	61.53	43.76	36.06	58.43	54.19	59.84	65.81	71.17	31.74	46.24	60.06	124.05	154.82	3.84	4.31	3.62	52.99	52.42	67.16	0.86	1.4	0.95	61.34	25.36	78.99	59.62
YER036C	41.87	32.63	46.03	32.04	105.32	79.45	84.81	75.4	82.11	85.66	67.26	77.41	26.65	18.56	24.73	9.56	67.57	65.82	64.73	30.65	34.91	36.59	68.03	54.32	47.81	61.73	126.42	227.92	259.51	4.73	4.73	4.7	36.81	42.72	45.04	1.79	2.91	1.72	45.66	16.94	44.29	15.48
YER037W	2.27	2.72	3.04	2.95	11.11	8.88	8.55	9.62	7.06	8.74	5.04	5.61	7.48	10.23	2.31	2.62	13.7	11.32	14.36	13.73	12.99	16.42	3.45	3.36	1.64	1.96	37.21	62.87	77.31	3.03	2.91	2.62	4.05	4.73	7.51	0.09	0.17	0.1	21.48	24.34	23.66	27.34
YER038C	2.38	0.88	2.7	0.8	7.35	5.9	5.74	4.98	6.7	7.51	5.67	6.01	0.66	0.01	1.3	0.08	4.13	3.89	3.57	0.31	0.27	0.47	2.78	2.65	2.75	2.93	7.76	20.02	17.93	0.32	0.51	0.35	2.36	3.07	3.71	0.04	0.14	0.05	2.64	0.11	3.03	0.32
YER038W-A	1.22	0.57	1.11	0.42	2.87	2.83	2.2	2.41	3.45	3.65	3.06	3.35	0.29	0.03	0.76	0.01	1.77	1.25	0.99	0.15	0.23	0.11	1.59	1.44	1.15	1.78	2.84	7.72	6.79	0.37	0.28	0.31	1.21	1.93	1.72	0.09	0.23	0.07	1.7	0.11	2.22	0.19
YER039C	0.37	0.3	0.28	0.21	0.55	0.68	0.93	0.41	0.86	0.56	0.65	0.48	0.26	0.03	0.34	0.04	0.72	0.45	0.61	0.1	0.08	0.13	0.34	0.23	0.28	0.31	1.98	3.46	4.76	0.29	0.28	0.17	0.58	0.37	0.77	0.04	0.01	0.03	0.67	0.13	0.73	0.22
YER039C-A	0.5	0.26	0.3	0.15	0.71	0.5	0.55	0.55	0.63	0.75	0.47	0.35	0.13	0.01	0.39	0.01	0.83	0.75	0.35	0.16	0.1	0.04	0.11	0.07	0.09	0.12	0.63	1.77	1.89	0.06	0.07	0.06	0.34	0.12	0.34	0.02	0.03	0.01	0.43	0.13	0.58	0.06
YER040W	20.09	15.78	21.62	12.8	94.92	78.65	82.49	75.38	85.18	96.87	79.1	92.52	9.17	1.1	13.08	1.18	50.4	49.74	48.68	7.68	8.07	8.8	23.35	20.08	27.81	32.52	88.76	232.5	241.86	16.08	14.98	15.43	36.39	31.85	42.89	5.66	6.37	7.01	32.38	5.99	37.63	14.02
YER041W	4.52	2.11	5.3	2.04	15.86	14.71	14.9	12.93	17.92	15.85	11.2	12.8	2.83	0.14	2.52	0.04	10.49	9.29	12.13	1.12	1.3	0.82	4.87	4.16	4.4	4.74	16.87	41.56	46.5	1.01	1.03	1.07	5.42	5.24	6.14	0.25	0.28	0.26	7.8	1.88	8.65	2.06
YER042W	11.43	12.21	9.58	7.78	1.9	1.78	2.29	1.68	2.57	1.92	1.52	1.7	0.65	0.56	5.14	3.02	3.45	2.39	2.25	3.28	1.97	2.29	13.22	11.45	8.61	11.75	1.83	3.14	2.59	0.07	0.16	0.07	6.53	4.63	3.24	0.11	0.1	0.04	1.27	0.48	0.98	0.19
YER043C	18.96	17.17	19.97	16.97	51.44	42.07	44.42	43.94	64.11	61.79	49.19	55.32	14.36	10.64	10.31	4.66	36.5	35.45	32.19	18.22	21.17	23.08	31.22	29.58	22.22	28.9	265.65	296.02	292.84	13.83	12.51	13.03	34.74	38.86	47.47	3.66	3.66	3.98	62.07	45.22	62.68	42.9
YER044C	1.12	0.88	1.27	1.13	1.87	1.53	1.22	1.17	2.39	1.86	1.49	1.76	1.63	0.93	0.56	0.27	1.45	1.14	0.73	0.83	1.3	0.8	1.21	1.9	0.76	1.29	9.48	13.35	13.79	0.49	0.59	0.37	1.48	1.19	1.88	0.06	0.04	0.01	4.34	0.93	4.01	2.11
YER044C-A	0.24	0.05	0.32	0.12	1.32	1.38	1.25	0.85	1.26	1.17	0.85	1.14	0.02	0.02	0.09	0.01	0.45	0.5	0.49	0.06	0.04	0.02	0.21	0.14	0.11	0.13	2.54	5.95	6.58	0.2	0.26	0.27	0.73	0.54	0.83	0.02	0.06	0.03	1	0.07	1.21	0.11
YER045C	3.17	1.66	3.86	1.62	17.96	15.48	13.16	12.79	22.68	23.47	15.68	18.15	1.78	1.5	1.14	0.36	8.72	7.32	7.62	3.33	2.82	4.21	4.74	3.7	3.45	3.33	12.54	26.37	29.34	0.8	0.71	0.88	3.55	3.38	3.6	0.11	0.25	0.1	5.86	0.86	6.43	2.59
YER046W	0.76	0.59	0.77	0.48	1.69	1.63	1.62	1.03	3.02	2.13	1.32	1.6	0.61	0.46	0.35	0.25	1.21	0.98	0.96	0.52	0.68	0.73	1.32	1.42	1.02	1.32	3.32	6.99	8.19	0.31	0.26	0.27	0.87	0.88	0.97	0.04	0.03	0.02	2.46	2.1	3.51	2.44
YER047C	19.53	14.45	22.12	11.84	85.23	71.97	72.89	63.21	74.19	86.25	60.36	72.03	11.44	1.11	11.42	0.64	47.83	52.65	53.12	6.59	6.56	6.11	26.45	22.41	21.9	25.83	89.96	237.65	256.22	9.14	8.18	8.37	30.53	30.22	38.38	2.48	4.29	2.5	38.59	13.59	43.48	17.2
YER048C	17.82	8.12	19.59	6.54	29.05	24.59	24.41	22.96	31.28	33.37	23.04	27.11	14.16	0.86	10.16	0.43	24.67	21.81	21.51	2.17	2.41	2.72	25.58	24.85	19.6	24.07	94.06	145.52	154.26	4.6	4.61	4.61	26.68	32.23	33.3	1.25	1.93	1.26	36.76	6.28	39.24	6.49
YER048W-A	18.63	15.54	18.58	13.75	18.15	16.68	14.9	15.91	20.56	19.31	19.12	18.73	9.41	5.89	14.72	5.57	19.54	13.06	12.76	10.14	10.44	11.99	29.8	32.37	20.58	36.15	45.46	92.05	88.44	4.29	3.52	3.8	18.12	20.43	23.27	0.97	1.54	1.08	26.88	3.33	26.89	9.33
YER049W	17.98	14.03	20.89	13.27	60.81	43.15	47.67	40.13	49.82	54.6	38.32	50.77	10.21	5.15	10.19	3.91	33.18	30.29	35.38	10.86	11.68	12.17	28.33	20.08	26.74	30.2	65.84	133.46	141.59	5.09	3.92	4.06	22.3	27.71	27.77	1.39	2.16	1.41	27.77	7.08	24.14	4.33
YER050C	18.8	12.25	15.52	9.36	16.91	16.81	15.63	17.43	21.72	20.48	19.39	18.44	8.21	2.12	10.52	1.34	19.63	15.61	13.98	5.37	4.49	5.87	21.13	20.69	15	22.08	35.98	66.81	75.7	3.82	3.94	3.45	18.17	19.61	23.41	1.37	1.53	1.15	21.91	3.38	24.36	7.44
YER051W	5.59	3.6	6.13	2.88	10.64	9.26	9.22	7.71	10	11.27	7.7	9.26	2.94	0.13	2.76	0.09	9.82	7.95	8.33	0.62	0.65	0.67	4.34	2.79	3.11	3.75	20.68	45.02	53.15	2.24	1.82	1.81	8.35	7.84	10.21	0.42	0.65	0.32	8.64	0.76	9.46	1.29
YER052C	28.02	27.43	25.56	21.48	97.42	77.65	96.26	92.57	71.24	89.97	83.94	106.52	16.37	18.53	22.44	14.66	48.79	47.24	53.98	50.19	46.41	62.5	50.27	37.93	51.96	61.54	86.07	165.29	176.32	6.78	6.04	5.16	27.87	28.83	30.18	1.25	2.33	1.26	26.74	27.31	25.98	25.64
YER053C	2.43	4.07	4.71	4.89	5.21	4.83	4.7	4.36	5.75	8.58	5.13	8.01	11.52	18.3	4.91	4.48	5.72	4.52	4.25	9.25	8.03	10.18	5.33	6.99	1.59	3.08	13.29	19.46	29.62	1.47	1.57	1.11	2.12	1.72	2.31	0.17	0.22	0.23	7.23	5.09	7.77	11.39
YER053C-A	6.28	13.13	8.29	15.15	22.52	23.16	21.8	28.7	6.98	11.72	14.46	15.94	10.8	19.53	19.85	22.77	53.7	38.67	28.29	69.63	60.49	73.07	13.42	34.18	5.18	15.26	6.76	14.63	19.05	0.22	0.23	0.22	1.17	1.33	1.58	0.01	0.05	0.05	5.07	2.14	6.03	13.22
YER054C	0.78	0.98	1.08	0.8	4.66	4.45	3.48	4.09	4.71	4.77	2.65	3.78	4.27	5.02	0.97	1.01	7.57	6.16	7.18	8.96	6.93	9.34	0.77	1.05	0.52	0.66	7.47	14.39	17.58	4.04	4.15	3.96	1.44	0.68	1.48	1.39	0.87	1.49	5.29	5.34	6.33	7.93
YER055C	12.61	11.06	12.83	9.46	40.77	31.87	37.31	38.55	52.07	49.68	50.55	51.75	14.73	15.34	11.97	8.5	19.48	15.93	18.6	25.75	25.07	31.5	24.55	19.87	23.6	29.65	89.81	143.18	156.78	5.87	4.55	4.81	20	20.29	22.89	1.25	1.47	1.63	34.97	50.29	36.62	44.28
YER056C	27.43	27.82	29.85	27.53	141.64	116.72	134.15	114.55	93.65	112.93	97.82	126.55	20.6	16.64	20.43	12.06	81.05	77.64	75.62	61.13	66.39	78.59	28.28	24.53	35.66	40.89	69.39	154.2	149.29	5.72	5.21	4.72	23.85	19.83	29.41	1.92	1.6	1.6	34	26.76	29.61	19.91
YER056C-A	49.34	32.44	45.46	27.86	68.08	68.06	54.83	59.6	67.87	62.3	61.7	64.13	29.26	16.51	29.45	10.46	58.57	41.97	36.01	29.7	32.03	34.47	69.88	70.05	47.38	68.14	218.02	164.73	164.63	14.5	14.83	12.63	49.03	50.14	58.47	3.92	5.15	4.27	72.3	5.76	76.42	17.96
YER057C	4.71	2.25	4.57	2.09	10.22	9.03	6.73	7.48	9.22	9.99	8.66	8.67	2.69	0.48	3.2	0.33	7.98	5.41	4.57	1.49	1.41	1.62	7.31	7.47	5.12	7.13	31.99	25.49	23.46	2.72	2.62	2.97	6.93	6.47	8.34	1.08	0.73	0.99	7.83	0.24	9.21	0.46
YER058W	3.23	1.48	4.16	1.57	2.71	2.6	2.35	2.59	4.56	2.98	2.92	2.34	2.47	0.11	2.41	0.11	3.78	2.57	2.37	0.55	0.45	0.37	3.2	4.03	2.61	3.47	11.24	16.96	18.7	0.83	0.6	0.58	5.59	5.95	7.86	0.11	0.07	0.05	9.12	0.58	9.89	0.82
YER059W	12.83	8.54	14.29	7.75	26.71	24.81	21.25	20.43	23.94	26.34	18.6	22.91	7.21	0.83	8.08	0.63	18.95	16.95	17.43	3.44	3.87	4.14	19.43	20.39	13.5	18.13	34	87.07	91.52	4.11	3.79	3.81	16.2	15.5	19.75	1.17	1.67	1.28	20.35	4.72	21.46	7.62
YER060W	2.18	1.45	2.94	1.44	9.53	7.88	7.51	7.88	8.72	8.34	6.8	9.45	1.35	0.33	1.01	0.19	4.78	4.27	3.87	1.48	1.38	1.94	1.93	1.62	1.34	2.32	8.4	16.88	20.73	0.74	0.85	1	2.8	2.56	2.81	0.26	0.28	0.4	2.59	0.74	3.08	1.16
YER060W-A	0.68	0.53	0.63	0.25	1.08	1	0.49	0.8	0.58	0.99	0.6	0.59	0.32	0.03	0.27	0.04	0.77	0.64	0.63	0.16	0.18	0.13	0.55	0.53	0.36	0.42	1.34	1.53	2.24	0.75	0.51	0.87	0.25	0.39	0.43	0.29	0.34	0.3	0.46	0.06	0.53	0.19
YER061C	1.81	0.69	2.17	0.84	6.45	5.7	5.65	5.03	7.69	7.38	5.29	6.63	1.21	0.12	1.15	0.05	3.79	3.23	3.38	0.36	0.41	0.37	2.15	2.08	2.17	2.36	13.1	29.34	28.01	0.86	0.77	0.73	4.83	4.45	5.87	0.13	0.35	0.15	7.53	1.04	8.15	1.3
YER062C	5.03	6.37	8.25	7.3	68.82	64.91	59.41	65.46	31.02	32.1	18.92	21.58	15.56	17.5	6.46	3.78	92.54	69.12	106.33	93.52	61.18	101.8	6.7	7.77	5.42	5.64	54.12	71.15	83.61	1.28	1.29	1.16	8.92	7.4	10.84	0.43	0.54	0.41	27.98	11.94	28.25	19.37
YER063W	10.63	3.82	8.78	2.84	13.7	13.36	10.38	11.64	15.9	15.32	12.51	14.48	5.54	0.31	5.52	0.23	12.78	10.5	7.67	1.33	0.87	0.78	11.71	12.3	7.38	10.69	35.5	59.73	71.49	0.66	0.95	0.76	13.12	14.15	16.85	0.45	0.53	0.33	17	1.49	18.26	2.06
YER064C	69.13	88.69	64.58	73.32	291.61	294.45	296.43	296.29	248.94	269.66	240.54	278.38	22.38	27.12	55.88	37.74	256.15	255.55	265.8	220.81	227.38	281.72	66.5	70.56	59.6	78.19	138.26	333	342.07	9.02	8.55	8.89	64.43	50.4	79.47	3.3	4.65	3.67	78.8	51.56	103.84	68.51
YER065C	1.82	1.05	1.77	0.8	8.9	8.05	7.34	6.04	8.95	9.27	6.6	7.85	0.93	0.35	1.11	0.25	3.27	2.61	3.59	0.99	1	1.19	3.02	2.93	2.41	3.72	9.67	22.43	26.68	1.19	1.29	1.12	2.45	1.89	2.88	0.46	0.42	0.4	2.97	2.08	3.43	2.6
YER066W	0.53	0.4	0.46	0.22	1.92	1.53	1.16	1.1	1.86	1.94	1.03	1.17	0.32	0.03	0.29	0.02	0.94	0.95	0.82	0.06	0.11	0.17	0.79	0.68	0.58	0.76	1.87	5.39	6.93	0.42	0.6	0.51	0.78	0.77	0.95	0.06	0.22	0.06	1.13	0.19	1.61	0.33
YER067W	4.41	7.5	4.63	5.46	4.79	4.6	5.51	5.99	4.81	5.19	4.24	4.58	9.57	17.17	5.49	6.08	8.1	5.41	5.87	14.2	13.54	14.58	6.97	13.49	2.84	8.33	18.29	33.28	43.77	0.99	1.09	1.12	3.72	2.93	5.77	0.19	0.23	0.33	26.12	7.25	30.59	21.21
YER068W	35.2	31.89	37.93	25.31	109.96	90.5	90.52	86.47	117.44	115.86	94.12	106.41	21.66	9.89	20.44	5.33	67.87	65.51	67.59	24.86	24.14	28.95	51.45	45.64	42.59	50.7	153.37	386.86	420.91	19.91	19.03	19.34	57.52	58.45	71.27	8.02	12.77	7.86	73.43	24.54	80.66	44.3
YER069W	5.82	6.41	5.37	4.89	23.41	17.81	25.11	24.84	23.06	23.07	25.16	30.73	4.76	7.49	6.22	5.98	8.81	8.11	8.54	10.01	10.38	12.34	7.54	5.97	10.21	13.25	25.61	63.51	63.72	2.55	2.29	2.7	11.56	11.24	13.51	0.82	0.98	0.9	11.87	25.43	12.06	19.13
YER070W	40.03	50.14	45.98	51.02	218.29	188.99	215.54	179.8	159.6	167.88	143.26	175.41	56.65	83.4	25.53	19.67	116.82	121.9	100.63	119.9	136.83	130.45	48.38	44.12	33.7	42.03	123.7	258.79	269.52	6.51	5.5	5.64	56.17	45.61	68.31	1.12	2.04	1	66.25	28.06	71.6	36.66
YER071C	1.8	0.73	2.02	0.65	1.42	1.23	1.25	1.08	2.24	1.33	1.61	1.84	0.88	0.08	0.7	0.05	1.53	0.77	0.8	0.26	0.11	0.3	2.04	2.12	1.39	1.76	6.05	8.44	6.86	0.57	0.53	0.39	1.6	1.72	2.07	0.2	0.19	0.21	3.35	0.13	2.98	0.43
YER072W	24.23	15.46	19.85	13.67	24.44	20.84	20.99	22.13	29.41	25.65	23.65	23.79	10.05	8.79	12.02	5.25	21.54	15.38	13.63	14.9	16.71	18.38	28.47	22.15	16.98	21.5	109.67	118.26	120.37	3.11	2.51	2.65	23.69	23.89	28.45	0.86	0.97	0.84	40.51	11.77	46.16	15.79
YER073W	19.52	19.78	22.31	23.01	96.11	80.65	98.35	86.19	100.73	117.04	94.47	111.68	24.83	26.73	19.94	12.23	36.64	39.26	41.88	31.16	30.72	37.71	28.04	23.68	33.35	39.44	79.69	212.24	194.6	5.47	5.61	5.12	37.1	42.18	39.94	2.67	5.14	3.21	31.09	28.28	30.54	17.71
YER074W	13.57	10.54	11.74	7.69	15.75	14.53	12.09	13.98	15.8	13.37	12.56	12.61	8.73	5.09	7.44	3.03	14.4	10.18	9.03	8.37	8	9.28	20.28	20.99	15.39	20.21	85.14	60.38	52.94	3.84	3.81	3.78	15.36	13.98	15.94	1.7	1.96	1.76	18.27	4	19.77	6.71
YER074W-A	8.5	4.26	7.69	3.9	5.9	5.7	5.02	5.35	6.35	5.99	5.6	6.09	3.15	0.34	4.42	0.38	6.91	4.14	3.5	1.31	1.11	1.27	11.33	11.46	7.09	10.88	16.2	24.76	23.95	1.07	1.14	0.9	5.83	7	8.34	0.47	0.52	0.48	8.72	0.91	9.36	2.08
YER075C	15.07	11.84	15.51	10.48	88.6	74.02	73.41	67.41	62.9	70.93	51.95	64.5	6.38	3.54	10.05	3.05	52.3	52.24	62.57	23.27	22.41	29.53	15.44	15.75	16.66	19.84	30.5	75.17	72.12	1.71	1.54	1.23	15.65	13.35	17.11	0.49	1.07	0.47	19.67	5.21	20.45	6.27
YER076C	1.18	0.4	1.21	0.45	3.16	2.55	2.2	2.04	3.4	2.74	2.05	2.29	0.59	0.02	0.68	0.03	1.55	1.23	1.62	0.06	0.13	0.06	1.33	0.85	0.83	1.11	4.55	8.68	10.78	0.47	0.26	0.28	1.34	1.56	1.58	0.05	0.06	0.04	1.48	0.35	2.07	0.29
YER077C	15.07	7.88	15.19	6.47	40.72	33.67	31.46	28.86	39.16	38.57	29.36	35.26	8.12	0.44	8.02	0.37	24.25	22.99	23.72	2.13	1.92	1.86	15.91	13.08	14.58	17.3	44.31	114.32	116.1	5.66	4.92	5.13	17.32	17.62	23.92	0.97	1.37	1.06	23.4	4.39	27.49	4.85
YER078C	2.56	1.71	2.93	1.49	7.37	5.33	6.23	6.31	9	8.28	5.96	7.34	2.42	0.47	1.69	0.12	4.53	3.82	4.55	0.7	0.68	0.63	3.71	3.73	3.57	3.83	18.48	36.82	37.11	2.8	2.72	2.04	4.93	4.88	5.55	0.52	0.49	0.55	7.21	2.66	6.76	2.59
YER079W	3.12	1.68	3.89	1.13	9.96	8.4	8	8.1	8.92	9.11	6.83	7.45	4.72	1.35	2.95	0.47	8.19	6.73	7.74	2.04	2.3	3.17	8.03	8.37	5.54	7.18	28.37	52.1	65.19	1.19	1.32	1.26	10.04	12.22	13.81	0.16	0.2	0.16	17.46	1.52	18.39	4.11
YER080W	13.21	6.94	15.13	6.07	36.29	28.94	29.66	25.58	29.81	33.88	24.07	30.84	10.42	1.08	7.79	0.64	23.73	22.31	22.8	3.23	3.92	4.1	18.22	16.73	12.07	15.5	75.62	138.04	147.96	4.12	3.89	3.61	21.21	22.75	26.41	0.86	1.33	0.82	29.63	3.77	29.11	4.82
YER081W	2.23	5.82	3.09	4.12	9.72	6.23	9.1	7.42	16.81	17.02	12.4	15.46	3.47	9.5	1.52	3.57	6.98	6.54	8.96	19.96	20.45	22.87	3.97	2.42	3.34	3.09	15.83	35.29	36.27	15.67	13.2	12.44	3.86	3.28	4.48	4.43	5.67	5.4	6.37	18.57	6.36	17.07
YER082C	29.3	13.94	29.01	12.42	67.71	53.48	52.59	47.18	68.52	70.8	55.52	65.59	11.32	0.81	14.09	0.89	33.82	31.47	31.79	2.39	3.13	3	41.28	27.46	34.49	39.65	72.15	164.57	157.34	9.29	8.76	9.14	26.85	31.44	33.03	2.94	3.74	3.31	29.36	2.45	26.96	2.76
YER083C	18.84	12.47	16.46	9.57	30.39	27.22	24.12	24.61	36.69	35.96	32.08	32.94	9.3	0.62	11.27	0.52	27.5	22.97	18.11	3.75	3.97	4.01	19.46	15.82	12.41	14.95	51.55	102.26	112.81	6	5.54	5.32	24.13	24.53	28.76	2.09	2.61	2.24	26.28	1.36	29.51	2.78
YER084W	0.22	0.19	0.23	0.11	0.58	0.73	0.61	0.78	0.98	1.07	1	0.77	0.06	0.05	0.15	0.04	0.98	0.5	0.3	0.11	0.13	0.11	0.1	0.11	0.03	0.04	1.53	3.14	2.8	0.26	0.16	0.23	0.31	0.25	0.3	0.02	0.02	0.04	1.05	0.07	1.06	0.25
YER085C	0.07	0.12	0.05	0.11	0.21	0.28	0.17	0.16	0.2	0.13	0.13	0.16	0.08	0.07	0.09	0.11	0.23	0.23	0.19	0.15	0.2	0.19	0.06	0.09	0.06	0.21	0.67	1.45	1.26	0.37	0.39	0.5	0.07	0.02	0.08	0.09	0.06	0.15	0.38	0.76	0.33	0.9
YER086W	8.55	7.64	10.01	6.38	45.85	39.42	41.69	41.26	52.92	55.61	46.82	53.38	8.49	4.14	6.26	1.75	23.33	23.52	24.89	9.98	8.75	10.53	14.69	12.07	16.22	17.76	63.38	92.78	100.34	7.41	6.84	6.39	13.58	15.17	16.18	2.39	3.02	2.7	17.51	6.77	17.63	6.31
YER087C-B	10.33	6.64	8.12	5.75	8.9	11.41	8.73	8.98	11.54	12.36	11.15	10.83	5.6	1.23	5.31	0.95	9.61	9.93	6.69	2.95	2.65	3.02	11.49	13.63	8.01	12.44	26.2	29.26	32.84	1.96	1.93	1.56	8.38	8.54	10.92	0.94	1.1	0.68	9.85	1.47	11.1	2.06
YER087W	4.7	1.59	5.42	1.43	10.85	8.71	9.45	7.83	8.77	8.82	7.12	7.58	3.05	0.09	3.13	0.05	8.17	7.18	7.09	0.36	0.52	0.54	6.17	5.65	4.4	5.44	21.95	51.86	53.22	3.3	3.15	2.96	8.99	8.14	10.77	0.89	0.82	1.09	11.87	0.86	13.54	1.36
YER088C	49.29	43.59	59.67	38.83	285.39	234.56	230.18	221.97	198.11	231.25	167.6	184.75	46.5	53.81	38.51	19.37	167.4	148.12	156.04	111.71	93.91	120.85	66.69	59.93	54.7	61.39	287.26	643.08	691.77	15.07	15.93	15.8	84.42	78.58	94.03	6.27	8.38	7.21	154.93	84.6	161.32	166.96
YER089C	10.84	10.57	12.37	8.98	22.62	17.76	20.01	17.66	29.38	27.91	21.71	24.27	9	5.1	6.68	3.87	17.27	15.88	17.27	11.67	11.65	12.73	15.34	13.95	14.3	15.55	46.4	76.78	76.12	5.31	5.54	5.1	16.04	16.96	18.75	1.85	2.3	1.77	19.83	18.28	22.02	11.38
YER090W	19.3	15.92	20.46	13.76	40.11	29.67	34.42	29.99	38.23	38.17	31.19	37.73	8.69	4.42	11.1	6.59	26.73	24.65	28.08	14.93	14.68	17.82	31.7	24.71	32.59	34.54	92.94	163.04	168.13	9.58	9.14	8.94	32.02	37.18	40.34	3.04	4.55	3.25	31.36	11.3	31.48	10.12
YER091C	95.84	89.97	98.62	69.57	79.99	73.29	70.57	67.41	45.04	47.25	26.52	33.61	11.22	12.76	36.79	22.89	71.2	70.1	75.66	55.25	45.98	61.33	148.19	96.09	113.48	101.96	172.49	231.94	249.01	15.93	14.65	15.6	77.33	52.51	52.58	5.21	3.14	3.14	51.17	101.94	47.64	74.72
YER092W	12.54	9.33	10.53	6.97	9.06	8.78	6	7.37	11.42	12.01	10.11	8.75	3.43	0.89	7	1.94	10.87	7.36	6.76	4.22	3.83	4.55	17.5	16.87	14.16	18.55	18.29	35.53	39.28	2.1	1.59	1.82	12.14	11.75	14.08	0.58	0.66	0.46	12.58	2.45	12.28	3.44
YER093C	22.81	12.17	25.18	11.17	76.25	53.31	53.06	48.38	57.69	66.48	48.74	58.35	11.53	0.43	12.71	0.26	41.69	39.19	40.94	2.64	3	2.98	24	17.33	19.06	18.93	93.8	218.27	223.59	5.57	4.95	5.01	29.51	31.55	36.68	0.99	2.14	1.22	36.81	2.58	39.19	3.3
YER093C-A	2.47	0.82	2.2	0.66	4.74	3.95	3.07	3.99	5.77	4.87	4.35	4.76	0.93	0.14	1.4	0.05	4.89	4	2.7	0.58	0.42	0.43	3.95	3.47	2.9	3.53	4.89	11.09	14	0.77	0.66	0.71	2.82	2.42	3.3	0.33	0.54	0.46	4.05	0.24	4.36	0.38
YER094C	22.45	15.19	23.16	12.12	30.34	26.97	27.83	25.62	48.92	42.24	29.98	29.91	16.82	3.33	12.98	1.72	31.03	23.77	21.33	7.68	6.34	6.6	32.25	31.14	23.93	30.81	63.53	117.3	116.73	4.64	5.3	4.67	29.4	29.5	37.53	2.02	2.31	1.76	44.18	15.75	47.37	13.9
YER095W	9.74	7.61	11.13	6.86	15.22	13.78	15.02	15.04	11.87	10.49	9.64	11.36	6.84	4.1	8.83	2.79	12.63	10.2	8.77	6	7.78	6.95	16.71	16.26	10.5	15.97	26.91	60.38	63.58	1.78	1.88	1.27	8.94	7.59	11.14	0.4	0.35	0.27	12.12	8.01	14.35	5.14
YER096W	0.16	0.12	0.16	0.16	0.82	0.6	0.43	0.39	0.76	0.56	0.4	0.4	0.23	0.48	0.12	0.14	0.79	0.64	1.1	0.58	0.73	0.82	0.27	0.11	0.09	0.16	1.53	1.93	3.08	0.95	1.16	1.27	0.39	0.47	0.45	0.22	0.36	0.27	0.46	0.46	0.48	0.43
YER098W	3.02	1.27	4.16	1.32	11.61	9.71	11.02	9.02	9.4	9.06	6.65	8.49	2.77	0.51	1.87	0.15	7.08	7.07	8.59	1.28	1.16	1.62	4.69	5.31	3.46	4.92	24.64	65.04	66.52	0.69	0.74	1.02	6.1	5.03	8.49	0.09	0.15	0.04	13.09	4.43	13.85	5.9
YER099C	11.66	5.47	12.79	5.73	10.38	8.18	9.77	8.33	15.6	11.93	9.61	9.98	5.43	0.13	5.83	0.14	7.32	5.84	6.85	0.49	0.61	0.63	9.78	5.12	8.93	7.59	29.38	49.12	47.27	2.36	2.46	2.25	8.48	9.07	10.02	0.71	0.7	0.72	10.82	0.86	11.17	0.65
YER100W	24.92	15.86	24.24	11.74	33.29	30.19	27.25	26.06	38.1	38.99	30.87	35.95	13.83	2.4	14.6	1.6	29.56	23.7	19.71	5.19	5.96	6.02	31.57	31.12	24.76	30.36	72.08	117.46	130.45	4.58	4.04	3.79	24.97	28.36	30.26	1.44	2.01	1.53	31.41	5.19	34.68	7.77
YER101C	1.62	0.51	1.55	0.52	5.14	3.48	4.47	3.28	4.23	4.26	3.19	3.57	1.08	0.04	0.99	0.04	2.87	2.27	2.56	0.21	0.24	0.35	1.3	1.53	1.22	1.23	7.95	18.17	18.28	0.59	0.53	0.41	2.23	1.86	2.13	0.03	0.2	0.13	3.13	0.35	2.82	0.44
YER102W	23.97	17.2	21.25	15.12	23.57	20.56	17.14	21.31	20.69	20.16	18.72	19.37	13.41	8.39	14.87	5.33	20.39	15.45	11.99	11.12	11.1	12.32	30.61	31.32	18.69	31.84	98.65	84.5	79.27	6.01	5.66	5.71	23.27	24.62	28.17	2.95	2.56	2.87	29.6	3.33	31.85	9.11
YER103W	39.91	22.38	40.65	11.92	13.06	11.61	10.58	9.8	7.54	7.43	5.2	5.53	8.61	8.74	10.51	3.49	37.81	27.72	24.99	15.03	13.14	14.43	44.3	33.56	12.49	15.01	25.9	46.39	59.59	3.23	2.75	2.45	20.07	37.28	21.67	1.27	1.53	1.65	13.74	11.23	16.07	13.07
YER104W	2.24	0.79	1.77	0.84	3.82	3.78	3.48	3.86	3.1	2.85	2.12	2.85	1.02	0.05	1.19	0.03	3.45	2.5	2.16	0.18	0.23	0.22	1.7	1.55	1.56	1.51	5.67	14.31	11.76	0.31	0.28	0.24	2.67	1.89	3.06	0.09	0.09	0.05	2.78	0.09	3	0.46
YER105C	39.51	28.4	42.87	24.72	80.15	65.96	71.7	64.17	73.46	77.7	60.83	76.02	20.31	3.33	21.24	2.39	54.27	58.94	58.11	9.95	12.49	12.56	41.23	34.48	33.35	39.9	140.57	293.44	310.21	16.13	15.9	15.97	40.83	45.65	53.51	5.52	9.02	6.51	47.55	11.14	50.19	13.28
YER106W	0.11	0.15	0.12	0.09	0.4	0.43	0.23	0.34	0.3	0.51	0.2	0.37	0.06	0.02	0.07	0.02	0.45	0.3	0.35	0.11	0.1	0.15	0.05	0.05	0.07	0.1	0.49	2.09	1.47	0.13	0.1	0.08	0.14	0.09	0.12	0.01	0.01	0.02	0.43	0.04	0.53	0.19
YER107C	7.89	5.59	8.83	4.17	18.59	16.46	14.7	13	21.35	21.28	15.86	16.12	5.49	0.67	4.57	0.34	12.99	11.16	11.28	2.13	2.11	2.57	9.46	8.27	8.28	9.75	35.39	78.22	78.5	4.62	4.27	4.11	12.25	13.43	14.44	1.42	1.95	1.68	14.22	2.45	16.7	3.73
YER110C	32.82	22.61	29.96	18.43	109.56	82.45	90.92	79.58	96.95	96.29	82.23	98.77	16.67	6.2	17.61	3.41	61.12	61.26	61.66	13.68	15.92	15.49	38.69	27.87	34.73	39.77	121.2	167.87	152.93	18.59	19.08	19.72	31.05	39.9	39.15	9.86	8.91	9.96	38.54	4.85	33.24	4.54
YER111C	20.27	13.1	27.33	13.54	84.36	66.94	79.85	67.62	50.83	53.96	39.06	43.8	21.27	10.25	12.72	2.95	46.19	49.53	47.84	14.86	17.54	17.6	32.25	34.46	23.86	29.96	115.19	279.29	293.75	11.71	11.56	11.64	38.19	32.06	45.29	1.08	2.46	1.07	53.16	10.11	61.74	21.28
YER112W	15.3	10.09	13.66	8.78	14.78	13.71	11.8	11.76	16	15.64	12.98	15.17	7.98	1.98	7.74	1.28	13.84	11.59	9.78	3.57	3.82	4.7	16.29	17.4	12.38	17.15	45.46	78.71	78.78	4.14	3.95	3.55	16.16	16.71	18.35	1.63	1.58	1.41	19.48	2.36	20.1	6.63
YER113C	8.9	5.05	8.78	4.91	21.57	17.74	17.22	15.75	17.09	18.7	15.1	17.75	5.83	1.58	5.39	0.74	11.93	12.77	13.07	2.34	2.92	2.87	12.02	10.22	7.6	9.45	31.28	62.55	71.91	4.37	4	3.88	8.12	8.45	9.82	1.04	1.74	1.44	9.8	2.9	13.14	3.03
YER114C	25.35	17.88	29.66	15.58	79.17	59.99	73.12	57.63	71.12	72.48	53.83	63.46	17.41	4.78	13.88	2.29	49.64	50.87	55.09	10.95	11.47	12.32	32.57	27.73	28.53	35	93.69	213.05	225.34	7.38	7.03	8.18	33.31	37.18	42.85	2.94	5.22	3.58	43.83	16.38	45.53	17.29
YER115C	2.48	1.66	2.54	1.01	5.03	3.98	3.8	3.28	4.06	4.58	3.08	2.9	1.74	0.28	1.08	0.09	2.62	2.75	2.91	0.5	0.41	0.63	2.7	2.28	2.06	2.87	7.65	18.81	20.17	1.18	1.21	1.3	3.86	3.84	4.82	0.36	0.44	0.35	3.56	0.5	3.76	0.67
YER116C	8.34	5.23	9.43	4.09	18.88	17.21	14.67	13.75	18.15	18.72	14.88	15.19	4.58	0.78	5.39	0.39	14.59	12.75	11.54	2.17	2.38	2.55	8.77	8.28	6.14	8.33	29.19	59.89	60.15	2.88	2.76	2.86	9.84	10.47	13.2	0.41	0.58	0.51	15.19	2.57	16.95	3.73
YER117W	19.38	16.12	19.63	13.69	16.36	12.58	13.45	14.81	19.18	13.34	11.33	11.87	15.92	9.06	9.32	4.68	13.67	11	13.47	7.85	8.61	10.16	30.33	32.78	25.78	38.11	103.13	95.27	82.35	4.35	3.85	4.14	23.05	23.5	26.21	1.62	2.83	1.44	31.95	5.02	30.19	11.38
YER118C	13.56	7.08	16.02	6.96	31.97	27.02	26.7	23.46	26.86	27.73	23.78	25.12	8	1.88	7.88	1.18	19.84	19.09	16.7	4.12	4.62	4.62	20	17.58	16.54	21.99	43.22	95.75	93.62	1.68	1.57	1.47	16.16	17.33	18.71	0.4	0.96	0.41	20	3.14	19.47	4.6
YER119C	4.5	3.03	5.68	2.61	10.32	8.45	8.55	9.05	9	8.82	7.03	7.02	5.83	0.43	3.41	0.22	10.83	8.75	9.43	1.4	1.46	1.29	4.61	3.8	2.79	3.44	23.59	43.33	53.29	1.46	1.32	1.16	8.67	9.15	11.34	0.26	0.65	0.34	13.03	2.01	15.64	2.51
YER120W	46.33	33.56	45.31	26.78	123.81	108.11	91.42	93.97	126.03	133.55	115.8	117.05	32.2	8.79	35.85	6.01	112.23	82.02	71.11	32.62	28.51	34.88	62.13	62.97	38.71	55	160.21	247.78	261.82	10.34	10.34	10.45	63.77	69.34	78.13	5.54	9.45	6.09	76.07	17.38	86.16	23.1
YER121W	0.52	0.22	0.67	0.18	0.9	1.13	0.58	0.44	0.71	0.61	0.31	0.67	0.62	0.8	0.39	0.19	1.28	0.75	0.52	0.88	0.82	1.01	0.34	0.37	0.22	0.31	3.28	6.75	5.88	0.22	0.15	0.12	0.58	0.86	0.93	0.04	0.02	0.06	2.91	0.26	3.63	0.59
YER122C	45.41	36.29	54.21	31.43	92.31	73.77	79.38	69.25	92.41	93.04	75.13	78.71	37.46	16.5	24.12	6.08	65.5	55.85	57.72	24.96	25.23	26.97	60.48	53.06	49.96	59.97	159.61	333.64	365.53	16.28	16.11	15.25	57.41	59.5	70.56	7.39	12.53	7.3	74.16	17.83	79.15	23.94
YER123W	17.87	14.33	19.84	12.38	44.09	34.52	39.03	31.25	39.52	49.25	35.63	44.28	12.2	2.87	10.53	1.58	28.58	28.49	27.07	6.8	7.21	7.68	21.02	20.17	15.93	24.34	56.92	134.18	128.07	12.69	12.42	11.07	18.78	18.47	22.52	4.4	5.25	5.01	22.07	4.78	23.41	5.98
YER124C	27.04	32.1	31.39	31.63	82.28	75.52	81.3	71.4	64.82	73.17	61.37	82.46	18.55	29.89	19.66	17.89	52.74	55.28	55.65	46.41	50.91	57.64	37.2	39.16	29.04	39.38	76	179.52	170.58	2.97	2.93	2.71	30.97	33.18	45.63	5.2	8.21	6.23	37.05	26.66	40.86	33.41
YER125W	21.83	16.99	29.39	15.36	67.79	50.53	65.26	48.88	62.85	70.02	50.3	58.3	24.24	7.28	10.98	1.98	42.37	41.35	45.61	11.78	12.13	14.02	28.49	28.19	23.58	28.66	112.91	207.74	223.59	8.22	8.72	7.72	30.75	32.99	39.61	3.22	6.07	3.21	43.61	24.95	45.73	20.99
YER126C	42.05	23.03	39.12	19.19	94.18	76.54	66.11	70.03	91.33	96.71	84.46	85.47	15.2	2.87	23.92	2.4	59.46	43.58	37.77	10.06	11.61	11.26	62.95	48.38	57.83	71.48	65.73	133.22	132.07	7.38	6.2	6.02	29.62	33.79	39.31	4.61	4.7	4.31	33.44	1.6	29.86	1.94
YER127W	37.59	23.42	34.26	18.75	73.56	61.19	59.35	49.96	77.42	71.06	61.17	66.92	13.3	2.41	18.04	1.83	41.05	37.51	40.26	6.36	6.85	7.36	48.1	31.18	48.3	54.94	73.87	186.68	181.43	8.83	7.52	8.19	38.96	41.7	48.99	3.98	5.96	4.45	37.35	4.03	38.03	4.59
YER128W	2.47	0.92	1.93	0.71	4.56	4.58	3.16	3.28	4.61	4.37	3.66	3.59	1.03	0.02	0.97	0.04	3.47	2.36	2.6	0.24	0.14	0.19	2.1	1.32	1.97	2.08	5.75	10.61	10.85	0.44	0.44	0.43	3.88	3.42	3.89	0.05	0.1	0.14	4.24	0.26	4.11	0.32
YER129W	33.15	25.73	42.45	22.53	122.55	90.43	103.91	84.58	131.9	133.2	94.38	112.58	24.38	4.68	18.91	2.26	68.61	68.14	79.72	13.22	15.09	15.79	42.69	36.21	39.18	40.68	110.75	270.45	289.27	20.47	19.44	19.39	43.29	40.81	49.01	6.69	12.39	8.26	54.97	16.71	56.52	19.91
YER130C	10.87	11.51	21.59	24.67	54.6	45.15	45.84	42.75	37.55	47.04	35.2	46.75	37.27	49.14	9.1	6.46	39.34	37.31	31.49	35.88	38.46	46.21	23.12	24.39	9.43	12.42	50.28	92.21	100.34	3.14	2.5	2.31	10.45	12.64	12.31	0.48	0.6	0.38	18.08	6.71	22.83	10.28
YER131W	52.49	37.29	54.29	33.4	39.88	34.02	30.33	34.55	42.62	34.39	31.88	29.56	32.2	19.31	28.62	11.08	33.9	25.33	24.89	17.9	17.95	20.02	74.18	72.31	54.98	78.85	146.69	126.86	132.35	6.8	6.32	6.29	37.12	40.25	48.57	3.27	3.79	3.06	46.36	12.05	42.65	13.18
YER132C	34.86	18.92	40.56	15	164.58	130.33	129.05	110.11	139.29	151.34	112.01	139.54	20.88	5.07	17.27	2.29	78.65	82.12	90.09	11.34	11.96	12.68	42.71	37.29	36.51	40.66	116.79	284.92	298.02	7.42	7.22	7.24	43.97	42.56	50.81	1.45	3.33	1.48	58.32	18.07	62.37	26.73
YER133W	25.84	20.62	28.18	17.41	57.92	49.53	51.12	49.75	52.9	62.01	48.25	55.85	19.18	11	19.23	5.62	42.45	41.17	35.1	17.31	17.41	18.27	39.28	41.04	27.41	40.17	98.73	164.57	173.8	5.82	5.08	5.29	27.13	29.16	35.62	2.26	3.53	2.39	37.7	15.36	40.66	24.78
YER134C	4.11	1.7	3.93	1.52	5.95	5.6	4.55	4.59	6.12	6.13	4.91	5.45	2.71	0.28	2.44	0.1	5.3	3.54	3.66	0.55	0.56	0.39	5.59	5.4	3.74	3.98	15.64	24.44	28.85	0.68	0.68	0.61	5.35	5.79	7.23	0.2	0.34	0.15	8.18	0.58	8.75	0.9
YER136W	19.81	12.93	26.08	11.87	55.47	45.63	48.68	44.17	50.25	49.38	45.46	48.51	18.95	8.99	12.3	2.93	36.56	36.38	39.67	14.49	12.99	17.6	28.5	31.3	24.72	30.59	113.77	179.76	188.71	7.8	7.7	6.61	26.28	26.94	31.63	1.69	3.05	2.07	48.66	24.41	48.48	32.83
YER137C	2.59	0.93	2.39	0.76	4.61	3.88	2.41	3.4	5.32	4.1	3.93	5.11	0.91	0.3	1.47	0.31	3.19	2.34	2.11	0.6	0.75	0.95	3.5	2.74	3.09	3.87	4.82	11.42	8.75	0.15	0.13	0.17	2.4	3.51	3.16	0.05	0.08	0.04	3.21	0.33	3.61	1.05
YER138W-A	1.98	1.86	1.79	2.19	2	1.73	1.68	1.7	1.79	1.97	1.7	2.13	1.1	1.54	1.75	1.58	1.72	1.05	0.96	1.95	2.51	1.94	3.6	5.69	2.56	5.2	7.91	8.04	7.84	0.37	0.42	0.42	2.57	3.09	2.73	0.2	0.18	0.11	3.02	0.37	4.29	2.87
YER139C	5.66	2.29	6.63	1.99	13.17	10.48	8.58	10.15	11.44	12.55	9.03	10.94	2.6	0.12	3.82	0.13	9.83	7.73	7.01	0.6	0.79	0.6	7.09	6.43	5.49	6.83	25.76	60.7	64.21	1.01	0.8	0.76	8.38	9.26	12.09	0.14	0.3	0.1	11.44	0.8	13.92	1.21
YER140W	6.05	2.95	6.44	2.21	12.88	11.26	11.02	9.14	12.65	13.82	10.53	12.77	2.31	0.38	2.75	0.25	7.29	7.07	6.52	0.54	0.87	0.8	8.29	7.36	6.56	8.18	17.8	43.25	42.64	3.51	3.3	2.9	7.16	6.54	8.1	0.77	0.94	0.76	7.8	1.17	7.77	1.38
YER141W	10.74	7.72	14.01	8.36	24.36	18.36	21.83	19.77	26.84	28.34	22.22	22.86	6.28	1.79	7.98	2.78	19.59	14.61	16.42	7.63	7.07	8.18	18.65	20.55	17.91	21.89	36.17	66.57	70.16	3.62	3.62	3.39	12.32	16.54	17.82	1.15	1.27	1.35	14.84	9.09	18.71	5.98
YER143W	13.57	12.5	16.56	10.37	31.1	28.54	26.99	23.58	30.54	33.19	25.41	26.74	7.27	2.63	8.14	2.93	28.65	23.02	24.87	16	14.49	15.23	15.57	15.04	13.31	16.04	41.58	89	91.73	2.51	2.59	2.35	19.38	18.29	21.59	0.5	0.86	0.43	25.93	4.96	25.73	6.33
YER144C	13.76	7.19	15.28	6.05	66.92	56.96	57.35	51.82	50.81	58.7	43.54	51.54	8.06	1.48	8.7	1.01	46.17	44.06	44.25	8.13	7.61	10.25	17.71	16.41	14.86	17.99	46.43	117.86	130.8	3.49	3.21	3.55	19.63	16.94	21.18	0.44	1.16	0.49	24.13	2.51	26.89	3.98
YER145C	37.39	42.8	36.21	32.92	39.09	29.54	34.71	31.91	37.4	34.49	30.81	28.63	15.14	11.24	23.81	14.57	49.94	33.4	43.54	38.85	30.98	41.29	27.64	20.48	22.9	28.08	212.91	326.41	370.71	5.18	4.42	4.69	69.53	80.44	107.54	2.37	4.51	2.71	163.67	62.16	176.75	39.3
YER146W	6.68	5.37	6.87	4.68	6.19	5.88	4.44	4.94	8.42	7.78	6.05	6.84	3.95	1.2	4.26	1.06	7.87	4.86	4.04	2.64	2.37	2.46	8.32	8.66	5.68	9.16	20.83	27.17	25.84	0.47	0.53	0.37	8.11	9.7	10.31	0.11	0.27	0.11	13.55	3.05	13.62	4.27
YER147C	7.87	4.44	8.72	4.12	19.67	15.58	14.55	13.71	21.57	20.8	15.04	15.99	2.11	0.1	4.35	0.66	14.55	14.86	15.27	2.5	2.87	3.67	8.44	6.31	9.93	9.85	24.22	53.87	51.96	2.94	2.65	2.68	9.21	9.72	11.14	0.49	0.81	0.4	9.55	1.71	10.79	1.51
YER148W	32.5	30.6	31.44	25.16	51.67	47.45	41.49	40.73	54.66	58.07	48.76	53.19	11.28	6.94	21.88	12.31	49.7	41.51	34.86	31.61	32.09	34.65	50.19	44.92	38.67	53.43	67.56	125.26	137.39	6.05	5.67	5.43	30.36	31.92	37.04	2.32	2.56	2.37	30.49	9.48	33.04	11.36
YER149C	6.85	3.12	7.44	2.66	15.78	14.18	12.03	13.04	14.26	13.8	11.73	11.1	3.17	0.21	3.59	0.09	12.34	9.47	9.13	0.86	1.1	1.04	6.54	4.25	5.19	5.47	21.05	44.7	49.86	0.81	0.84	0.92	9.98	10.73	11.63	0.19	0.47	0.16	9.2	0.45	10.49	0.9
YER150W	8.98	9.91	10.94	9.49	15.91	13.61	14.38	14.95	8.19	12.44	8.79	9.15	26.98	35.53	12.58	8.77	63.02	39.19	34.28	75.88	59.43	81.98	6.48	6.74	2.08	3.06	6.61	12.22	12.11	0.23	0.26	0.12	1.92	1.77	1.94	0.08	0.15	0.11	4.18	2.29	4.21	6.01
YER151C	78.68	64.22	80.05	48.32	270.94	227.23	216.35	203.24	216.86	257.94	205.34	254.17	51.11	11.41	53.56	5.62	188.94	188.34	161.23	40.34	40.74	45.67	98.67	85.78	73.09	89.34	288.98	677.98	718.59	28.86	29.2	28.85	110.8	119.64	135.37	10.12	17.58	10.36	130.61	24.19	137.41	40.38
YER152C	9.94	9.13	11.03	7.43	34.74	33.07	28.76	28.63	30.54	31.03	24.83	26.05	8.14	5.2	7.01	2.43	25.07	23.34	21.56	10.71	8.99	11.07	10.81	10.18	10.22	10.42	59.76	122.2	141.31	3.92	3.38	3.91	20.5	19.85	23.51	0.92	1.66	1.04	30.58	9.85	32.66	9.87
YER153C	2.05	1.62	2.27	1.27	6.8	6.48	5.74	5.14	6.5	6.63	4.35	4.55	1.31	0.61	1.54	0.28	4.4	4.02	3.31	1.41	1.32	1.7	1.99	1.94	1.58	2.14	8.77	17.85	16.6	0.53	0.9	0.67	2.45	2.54	3.97	0.18	0.21	0.19	3.29	1.86	3.23	1.21
YER154W	12.15	6.89	13.4	5.12	30.55	30.47	25.17	26.11	34.2	33.03	30.34	29.51	7.74	2.17	7.08	1.41	24.05	18.75	16.77	6.6	5.51	7.08	16	14.79	11.09	13.66	46.06	85.54	85.29	2.71	2.4	2.82	14.82	14.57	17.36	0.57	1.09	0.6	20.32	4.05	23.68	7.25
YER155C	62.85	43.07	68.61	38.89	197.06	152.44	171.87	143.22	172.45	194.17	137.46	184.8	44.45	22.05	37.73	10.4	117.2	128.92	123.57	42.58	46.65	50.57	91.16	85.85	66.59	84.17	244.79	511.8	552.63	20.5	18.3	18.02	56.72	60.87	70.32	4.94	6.57	5.15	72.7	32.3	82.12	42.39
YER156C	15.47	7.25	15.3	6.25	18.83	14.18	14.67	13.98	23.36	19.04	17.96	17.32	10.74	0.8	7.51	0.41	14.08	10.04	10.93	1.56	2.27	2.01	22.35	16.76	18.39	20.62	33.63	70.67	71.91	2.01	2.21	1.96	12.88	13.57	14.97	1.07	1.51	1.07	12.71	3.05	13.54	3.17
YER157W	9.97	5.02	10.39	5.25	25.57	20.59	22.3	19.24	23.87	24	17.69	21.39	4.86	0.35	5.07	0.3	16.25	16.52	18.6	1.43	2.04	1.98	10.86	8.57	8.56	9.7	35.27	75.65	83.82	2.59	2.58	2.17	10.55	11.24	14.82	0.54	1.18	0.71	13.66	1.65	14.05	1.84
YER158C	3.09	2.79	4.62	3.55	24.7	22.61	21.83	20.04	21.09	23.89	16.13	18.6	9.29	8.7	2.89	1.66	21.08	19.88	21.58	14.99	14.14	18.42	4.24	4.23	2.76	3.09	21.95	47.51	63.3	2.15	1.84	1.73	3.13	2.89	5.95	0.2	0.26	0.25	12.22	8.11	17.33	18.21
YER159C	35.73	57.74	42.53	48.35	68.58	59.89	56.8	54.35	74.65	73.25	70.69	68.07	51.86	83.07	27.7	27.01	72.1	52.17	46.41	91.08	80.98	93.43	47.2	49.55	28.23	36.88	105.34	236.2	239.83	0.79	0.94	0.95	38.41	42.58	53.99	0.55	0.92	0.4	131.94	85.9	144.09	141.87
YER161C	18.53	13.52	21.02	11.32	43.38	35.97	37.26	30.54	44.3	43.58	34.2	35.6	11.36	0.8	10.64	0.55	30.97	25.63	30.05	4.43	4.92	5.03	21.21	16.97	17.6	18.58	66.4	154.52	166.03	6.28	5.84	5.96	28.03	30.62	35.6	2.02	3.11	2.2	35.38	11.43	37.93	7.52
YER162C	10.15	4.35	11.77	4.54	29.52	22.49	22.24	20.48	23.84	27.89	18.85	21.71	6.78	0.85	6.42	0.39	19.63	18.59	21.7	2.47	2.65	2.98	11.21	11.22	9.98	10.35	39.57	100.33	107.28	1.54	1.88	1.81	12.22	13.35	17.82	0.18	0.53	0.21	19.54	3.59	24.11	3.62
YER163C	4.32	2.55	4.03	2.13	3.74	3.85	3.6	3.51	5.34	4.16	4.31	3.75	2.6	0.4	2.55	0.26	5.1	3.45	3.28	1.18	1.06	0.97	6.07	5.23	3.54	5.5	14.82	22.75	22.27	1.36	1.2	1.27	4.49	4.19	5.93	0.17	0.33	0.24	7.5	0.99	9.16	1.59
YER164W	28.52	18.13	36.02	14.62	83.67	64.49	73.27	54.62	73.26	75.22	54.59	65.3	20.6	4.98	13.39	1.91	43.49	48.31	51.4	7.06	7.44	7.25	38.05	28.62	33.16	30.96	123.89	260.48	266.09	16.75	16.56	16.98	38.51	39.9	44.72	6.7	8.4	6.58	46.15	10.36	44.34	8.87
YER165W	25.8	19.14	29.42	17.19	113.36	91.35	95.01	85	97.55	106.76	80.37	102.95	19.43	9.55	14.86	4.62	69.03	70.64	72.28	28.22	32.06	34.75	44.25	35.58	31.18	36.46	148.97	187.64	210.63	18.24	17.7	17.03	28.47	32.72	34.96	5.36	4.95	5.1	35.84	16.31	34.43	12.18
YER166W	26.93	17.76	31.79	16.16	75.72	54.43	70.43	55.72	62.02	64.99	48.45	57.93	22.52	4.39	15.45	2.02	47.17	46.56	51.57	9.51	10.49	10.66	35.99	33.22	30.57	36.6	114.74	237.73	254.33	8.82	7.99	7.94	35.22	37.37	43.97	2.57	4.89	2.57	46.44	19.69	49.06	17.2
YER167W	14.88	8.79	20.09	8.4	77.7	64.64	65.58	55.15	61.01	71.41	47.58	53.86	9.78	2.1	7.91	0.98	34.81	37.17	37.16	6.34	7.04	7.81	24.66	23.28	21.49	25.43	93.06	213.21	228.14	7.39	6.72	7.04	25.49	24.62	32.46	2.21	3.55	2.82	40.13	14.06	45.35	18.61
YER168C	9.02	6.02	8.93	5.36	15.57	14.13	13.02	12.08	17.97	19.07	13.83	16.66	4.43	0.53	3.95	0.42	10.76	10.22	10.93	2.13	1.7	1.79	7.87	5.17	6.86	7.27	30.91	64.48	68.27	3.26	3.23	3.34	10.67	11.61	13	0.79	1.23	0.78	14.79	3.16	14.25	3.51
YER169W	13.54	10.36	19.39	11.3	93.68	72.67	72.45	63.3	58.14	68.99	50.1	62.69	13.95	9.14	8.93	3.16	51.45	52.03	58.14	22.54	22.61	26.75	20.26	16.71	20.83	23.31	60.51	135.63	143.06	3.26	3.15	2.61	21.91	22.76	27.52	0.31	0.81	0.26	29.68	8.59	30.72	13.83
YER170W	2.5	1.31	2.64	1.05	5.43	4.55	5.1	4.32	5.24	4.85	4.02	3.3	1.45	0.07	1.66	0.04	3.66	3.18	2.13	0.26	0.2	0.32	2.75	3.31	2.4	3.38	10.64	26.69	22.76	0.37	0.29	0.43	4.84	4.12	5.23	0.16	0.2	0.1	5.67	0.26	6.53	0.51
YER171W	13.43	11.22	14.01	9.28	28.15	23.91	25.37	22.48	32.36	31.46	23.53	30.41	8.66	2.08	7.18	1.25	19.46	16.77	21.04	4.12	4.17	5.5	13.88	11.59	12.43	13.98	31.65	70.99	81.3	7.73	6.79	7.34	13.33	13.31	16.65	1.89	3.09	2.4	20.1	7.7	19.32	6.38
YER172C	47.93	30.7	51.81	27.86	94.18	71.82	82.4	67.89	93.9	100.04	73.79	95.13	23.58	2.09	24.24	1.45	57.19	58.6	57.41	7.17	8.48	9.17	50.26	39.16	37.09	41.38	133.07	304.46	307.76	10.84	9.78	9.5	37.97	41.42	46.34	2.79	5.23	2.67	47.2	11.97	49.13	9.19
YER173W	5.11	3.45	4.62	3.26	11.96	11.61	10.29	10.47	11.64	11.8	9.93	12.24	2.25	0.17	2.82	0.11	8.23	8.68	8.68	1.33	1.7	1.23	4.56	3.23	3.59	4.34	16.24	33.04	34.31	3.39	3.06	3.71	5.98	5.38	6.36	0.93	1.05	0.91	8.39	1.28	9.23	1.33
YER174C	2.53	1.12	2.91	1.02	5.72	5.23	4.64	4.11	5.65	5.33	4.39	5.59	2.17	1.59	1.29	0.33	3.4	2.82	2.63	0.88	1.08	0.69	2.86	2.95	2.54	3.65	9.44	23.23	19.19	2.57	2.01	1.67	2.16	1.95	2.86	0.7	1.02	0.84	2.91	1.41	3.96	1.21
YER175C	2.86	1.62	2.96	1.4	9.8	8.28	11.48	11.37	13.08	12.71	12.31	13.06	3.5	2.14	3.41	1.18	4.55	3.34	4.04	3.81	3.75	4.92	5.06	3.61	7.18	7.88	22.25	36.34	40.4	3.8	3.21	3.29	8.4	10.35	12.52	1.13	1.22	1.13	17.73	2.16	16.77	2.08
YER175W-A	0.5	0.12	0.47	0.14	1.95	1.65	2.29	2.07	1.16	2.05	2.1	2.5	0.35	0.12	0.61	0.15	0.96	0.93	0.61	0.37	0.49	0.56	0.76	0.98	0.69	1.45	2.39	4.98	5.6	0.13	0.12	0.17	1.05	0.89	1.74	0.04	0.07	0.04	1.62	0.13	2.35	0.24
YER176W	38.95	28.6	43.95	24.48	95.34	74.04	82.75	68.97	85.86	85.45	67.68	78.55	20.09	7.49	22.81	3.91	52.66	50.51	58.14	12.64	12.47	14.5	43.03	35.19	36.18	41.16	146.84	320.54	325.26	21.52	19.7	19.32	42.34	45.63	52.13	4.18	5.43	3.84	47.33	7.49	49.81	9.25
YER177W	98.33	139.23	127.11	127.38	215.34	185.93	198.03	188.87	230.95	214.5	172.1	177.8	164.27	235.02	80.32	69.31	203.96	154.12	161.6	247.85	211.5	250.68	159.66	162.42	109.3	131.01	669.3	1162.68	1325.56	14.68	14.94	15.22	187.83	206.08	268.25	3.46	9.04	4.11	421.01	273.13	460.93	438.62
YER178W	5.95	4.46	6.53	4.01	11.54	9.31	10.29	9.51	13.21	11.37	8.7	10.06	6.03	3.24	3.75	1.25	9.65	7.45	8.77	3.26	3.68	4.23	9.58	9.08	7.64	8.52	51.55	44.78	56.93	5.3	5.44	4.57	7.9	9.07	10.11	1.66	2.01	1.46	13.55	4.63	12.03	4.68
YER179W	0.4	0.19	0.36	0.05	0.29	0.33	0.32	0.21	0.4	0.29	0.36	0.21	0.16	0.09	0.17	0.02	0.23	0.23	0.19	0.03	0.11	0.02	0.11	0.32	0.2	0.25	1.38	2.17	2.31	0.42	0.28	0.22	0.25	0.19	0.26	0.01	0.03	0.01	0.67	0.13	0.73	0.11
YER180C	4.51	2.18	5.47	1.92	10.06	8.35	10.44	6.84	11.39	10.81	7.21	9.21	2.71	0.26	2.06	0.19	5.38	4.93	6.38	0.6	0.54	0.52	5.41	4.8	4.74	5.37	16.46	38.03	39.91	0.9	0.84	0.65	6.76	6.28	7.64	0.13	0.32	0.1	9.45	3.24	9.99	2.81
YER180C-A	2.14	0.83	1.71	0.93	3.42	4.15	3.36	3.08	4.03	4.53	3.66	4.12	0.58	0.17	1.13	0.06	2.25	2.43	1.01	0.19	0.25	0.15	2.46	2.67	1.61	2.32	5.41	12.62	14	0.42	0.44	0.45	1.95	1.96	2.57	0.11	0.04	0.1	2.32	0.32	3.25	0.48
YER182W	6	1.95	6.38	2.02	7.48	6.85	4.96	6.31	8.97	9.11	7.05	7.61	4.21	0.25	3.57	0.1	7.51	5.66	5.18	0.54	0.79	0.88	6.96	7.43	4.67	7.09	14.97	31.68	40.26	0.88	0.89	0.79	5.4	5.8	7.15	0.14	0.23	0.27	8.61	0.65	10.34	1.51
YER183C	2.82	1.6	2.56	1.19	2.95	2.38	1.94	1.88	3.6	2.34	2.72	2.47	1.73	0.23	1.45	0.15	2.32	1.61	1.67	0.23	0.32	0.35	4.03	3.18	2.7	3.42	10.15	18.17	23.53	0.58	0.45	0.79	4.76	5.58	6.46	0.11	0.29	0.12	5.69	0.32	8.12	1.05
YER184C	3.38	1.91	4.24	1.7	9.01	7.28	8.58	6.82	10	10.52	7.23	9.13	1.41	0.15	2.1	0.45	6.91	7.18	7.84	1.57	2	1.57	5.53	4.59	6.06	5.98	12.73	27.5	31.09	0.63	0.55	0.5	4.11	4.31	4.9	0.12	0.28	0.13	4.13	1.6	4.34	1.02
YER185W	0.45	0.48	0.36	0.26	0.95	0.78	0.96	0.87	1.44	1.28	1.16	1.41	0.17	0.1	0.22	0.17	1.3	1.05	0.77	0.94	1.2	1.36	0.53	0.37	0.52	0.51	1.08	2.33	2.03	0.52	0.56	0.74	0.24	0.25	0.3	0.17	0.16	0.2	0.54	0.2	0.45	0.33
YER186C	1.95	1.09	2.46	0.96	4.5	3.55	4.35	3.15	4.69	4.71	2.79	3.27	1.33	0.08	0.91	0.04	3	2.43	3.47	0.21	0.35	0.28	2.27	1.94	1.94	2.54	9.85	16.16	20.03	0.62	0.61	0.56	2.35	2.53	3.12	0.08	0.14	0.09	2.81	0.91	3.56	0.49
YER188C-A	0.62	0.57	0.42	0.49	2.29	2.48	2.06	1.81	2.09	3.22	1.45	1.94	0.41	0.38	0.41	0.1	1.36	1.36	1.24	0.67	0.59	0.63	0.31	0.18	0.11	0.24	1.23	2.65	3.71	0.28	0.31	0.21	0.41	0.3	0.49	0.09	0.1	0.07	0.57	0.15	0.96	0.6
YFL001W	9.65	5.33	9.68	4.33	19.52	16.71	15.69	15.15	22.23	20.91	17.29	20.65	5.12	0.57	5.29	0.31	12.57	12.41	10.7	1.07	1.46	1.1	11.07	10.38	8.39	10.85	24.04	56.68	55.04	0.94	1	1.05	9.6	11.28	11.87	0.32	0.62	0.24	11.31	1.52	10.92	1.81
YFL002C	11.33	5.91	12.85	5.74	24.78	18.21	20.21	16.12	24.22	24.48	17.73	20.52	6.07	0.48	4.26	0.27	14.44	14.41	14.19	1.46	1.61	1.32	11.91	8.34	10.83	10.42	29.79	64.48	60.64	2.15	1.71	1.52	8.43	9.86	11.6	0.41	1.17	0.52	9.77	1.92	9.84	1.6
YFL003C	0.52	0.55	0.54	0.34	1.9	1.68	2.03	1.26	1.46	1.57	0.89	1.7	0.35	0.98	0.32	0.29	1.34	1.3	1.27	0.84	0.89	0.95	0.26	0.16	0.17	0.28	2.2	5.06	5.6	0.15	0.05	0.07	0.37	0.35	0.53	0.02	0.02	0.04	0.81	0.52	0.78	0.95
YFL004W	40.34	30.58	42.37	28.65	71.77	53.73	67.06	54.44	65.62	67.17	52.02	62.74	12.81	4.52	18.84	8.91	39.51	43.13	45.94	16.86	21.58	23.77	58.64	44.67	54.19	59.67	177.3	322.79	325.19	9.73	9.09	8.8	39.48	45.6	49.03	2.25	3.43	2.24	58.88	38.21	57.71	21.75
YFL005W	10.13	5.32	12.73	5.57	14.85	10.53	12.7	10.1	16.96	15.21	10.84	12.32	8.55	0.7	5.61	0.37	11.74	8.82	10.58	1.67	2.08	1.62	18.03	16.83	13.9	17.52	42.96	65.84	76.26	2.17	2.3	2.05	12.63	13.35	15.72	1.1	1.21	0.95	17.08	6.8	17.76	3.81
YFL007W	37.73	29.65	43.92	26.71	105.38	78.67	86.69	71.4	93.09	103.19	74.26	93.72	27.23	7.35	20.98	3.38	71.29	70.66	73.93	18.22	19.07	21.03	44.25	38.3	36.53	42.71	147.03	269.24	288.08	17.17	15.48	16.03	39.7	40.95	47.51	4.22	6.13	3.87	53.84	28.19	52.76	26.23
YFL008W	28.37	19.47	32.79	18.56	62.24	48.63	55.67	46.79	46.02	46.61	34.69	40.9	21.78	3.88	16.55	1.65	37.77	38.13	43.92	6.95	8.41	8.61	33.63	26.27	28.28	28.17	127.13	283.96	307.34	12.62	12.15	11.73	45.19	42.93	51.91	2.44	4.31	2.33	49.25	11.21	54.23	12.9
YFL009W	14.08	8.43	16.21	6.9	40.06	32.32	34.59	29.43	37.47	40.75	32.06	38.48	8.37	0.39	9.33	0.5	22.74	23.27	22.71	3	3.08	2.85	23.99	20.19	20.46	23.89	64.65	141.5	151.81	4.55	3.66	3.95	21.57	24.81	26.53	1.1	1.85	1.1	23.77	4.46	27.64	5.22
YFL010C	19.85	12.75	18.41	10.81	33.71	31.07	23.75	25.26	43.72	45.81	38.68	39.91	9.89	1.76	12.83	1.6	30.58	21.52	18.91	6.75	6.65	7.72	35.38	36.38	24.41	31.77	87.05	90.77	99.78	10.37	9.98	9.58	28.59	32.51	33.8	4.16	4.07	4.01	34.06	7.34	40.76	8.92
YFL013C	27.26	18.11	29.03	14.9	71.01	56.58	60.45	51.45	66.88	69.44	49.19	59.84	16.95	1.81	15.32	0.93	48.94	44.53	53.21	7.45	7.38	8.69	31.49	24.37	25.2	27.09	96.04	234.59	262.52	14.59	14.32	14.14	35.95	37.37	44.94	3.62	4.74	3.6	50.28	7.72	54.76	8.77
YFL014W	0.36	0.97	0.73	0.89	3.27	3.28	3.31	3.38	0.25	0.35	0.16	0.82	14.4	25.78	3.21	4.45	26.39	13.63	17.01	51.59	42.27	53.37	0.1	0.28	0.07	0.09	5.04	1.69	2.8	0.12	0.08	0.1	0.12	0.12	0.1	0.03	0.01	0.02	2.1	26.14	3.78	48.39
YFL016C	88.56	74.51	102.3	53.78	70.11	56.33	56.31	47.73	60.08	59.45	44.28	44.65	33.16	23.84	37.96	12.48	93.9	75.84	75.87	38.08	34.4	34.78	143.7	131.09	84.21	111.17	143.45	302.45	369.73	5.38	4.6	4.9	116.97	120.37	125.38	1.69	3.21	1.18	82.79	86.74	92.41	68.9
YFL017C	10.5	4.44	8.68	3.86	9.46	8.66	7.51	7.65	11.57	11.61	8.61	8.46	6.7	0.94	6.67	0.44	9.7	7.38	5.84	1.31	1.2	1.25	13.21	12.83	7.72	10.85	29.49	51.94	51.54	0.65	0.86	0.67	14.74	15.57	17.96	0.17	0.44	0.18	18.03	0.39	21.01	1
YFL017W-A	5.33	3.29	4.63	2.29	3.08	3.55	2.84	3.05	5.07	4.71	4.13	3.62	2.16	0.08	2.42	0.12	4.42	2.89	1.78	0.83	0.55	0.93	4.58	5.58	2.88	5.58	11.2	17.37	19.4	0.32	0.36	0.43	5.68	6.75	6.38	0.12	0.13	0.07	6.99	0.84	7.89	1.25
YFL018C	10.17	8.7	12.17	7.41	22.68	16.83	17.57	16	21.9	19.79	15.5	15.83	10.76	3.39	5.5	1.26	16.65	12.97	19.12	5.97	5.63	5.52	12.68	11.61	10.34	13.62	68.53	88.52	94.6	4.93	5.31	5.04	18.87	18.17	22.74	1.58	2.41	1.62	23.02	7.01	25.27	6.77
YFL021W	16.3	27.49	18.46	22.82	87.31	87.98	81.94	87.43	76.06	87.87	72.88	76.23	18.86	46.8	14.7	17.3	73.76	61.92	55.7	114.16	95.57	120.72	22.8	28.44	16.41	22.01	64.87	151.14	167.36	6.57	6.49	6.99	33.38	25.57	32.22	1.3	1.87	1.29	42.96	24.39	55.54	74.38
YFL022C	14.59	9.88	16.76	9.23	44.75	37.15	37.14	34.32	48.16	46.67	36.07	40.39	12.56	5.29	7.15	1.83	29.88	28.02	25.9	9.38	9.21	10.48	19.28	16.83	15.46	18.96	68.57	110.14	113.86	7.1	7.01	7.17	15.91	19.89	20.94	2.71	3.23	2.56	21.35	5.84	21.46	5.97
YFL023W	31.31	20.54	30.12	16.53	88.97	66.24	73.56	56.76	73.01	73.67	55.37	68.62	15.63	3.93	17.56	2.03	45.28	44.15	49.62	5.87	6.54	7.29	31.22	19.2	30.04	33.98	95.71	237.33	232.83	9.77	10.4	10.39	33.52	42.53	41.94	2.86	4.24	2.91	47.82	9.98	39.42	7.52
YFL024C	13.89	8.13	13.83	7.8	62.34	53.28	54.74	48.03	48.11	54.76	41.74	52.02	9.18	2.53	8.95	1.39	35.35	33.22	36.51	8.39	9.31	9.97	19.36	20.78	15.5	21.11	57.41	145.11	147.96	3.84	3.48	3.03	15.11	14.96	20.15	0.57	1.05	0.6	50.38	33.34	55.21	56.32
YFL025C	7.27	4.44	7.49	4.03	26.34	24.24	24.67	22.66	24.8	26.88	19.61	25.86	4.85	0.35	4.11	0.14	15.86	17.11	14.15	1.35	1.73	1.64	6.51	6.52	6.02	8.16	25.53	59.57	64.56	3.29	2.83	2.3	8.09	8.29	9.82	0.49	0.92	0.36	9.69	1.36	10.01	1.35
YFL027C	2.56	1.41	3.18	1.29	5.61	5.4	4.32	4.68	5.9	5.7	4.57	5.32	1.28	0.05	1.61	0.02	3.36	3.45	3.19	0.21	0.24	0.11	2.27	1.24	1.85	1.45	12.02	28.38	28.08	1.13	0.9	1.01	4.18	3.31	4.27	0.29	0.18	0.27	4.99	0.56	5.57	0.71
YFL028C	2.23	1.2	2.67	0.93	6.93	5.08	6.03	4.98	8.74	9.3	7.76	8.59	1.78	0.06	1.49	0.08	2.93	2.34	2.44	0.45	0.42	0.39	3.94	3.48	4.79	6.29	12.58	22.83	21.85	1.33	1.32	1.21	3.79	4.3	3.83	0.25	0.21	0.24	4.45	0.67	4.74	0.59
YFL029C	3.59	1.6	4.25	1.29	13.22	10.48	10.38	10.42	12.73	13.85	8.97	9.53	2.31	0.08	2.15	0.06	10	8.82	8.66	0.58	0.79	0.86	2.99	2.68	2.59	2.56	17.66	31.52	38.51	0.95	0.77	0.76	5.47	5.3	7.23	0.09	0.1	0.08	8.12	0.43	9.05	0.86
YFL030W	1.34	1.09	1.43	0.9	3.66	3.63	2.52	3.15	2.34	2.74	1.87	2.37	0.55	0.23	0.91	0.46	7.53	4.73	5.49	5.66	4.85	7.92	1.49	1.35	1.29	1.85	2.2	4.5	4.06	0.08	0.13	0.11	0.8	0.7	0.79	0.02	0.03	0.02	1.38	1.28	1.41	0.63
YFL031W	19.46	17.95	30.3	19.13	40.61	33.19	37.69	28.86	38.26	43.02	27.22	33.1	28.82	30.57	11.64	7.24	40.11	32.83	32.38	38.02	31.3	38.83	22.04	25.9	23.96	22.41	158.86	246.09	174.15	4.86	5.02	4.84	26.34	29.67	33.9	1.82	2.01	1.4	55.86	90.36	60.03	49.44
YFL033C	32.33	22.49	42.2	21.31	119.55	91.78	99.85	85.8	92.84	110.46	81.38	96.06	22.73	8.66	23.02	5.63	73.18	74.32	77.68	24.83	25	27.55	49.08	46.76	40.38	48.17	124.04	303.73	319.31	9.17	9.18	8.35	42.9	42.72	52.27	2.72	4.51	2.92	58.45	21.01	62.85	35.38
YFL034C-A	10.94	9.25	11.9	7.08	22.26	22.99	21.63	18.92	20.97	17.74	16.51	19.53	8.13	4.23	7.8	2.99	14.99	13.77	14.26	8.16	9.76	12.02	21.35	21.81	17.39	21.44	28.74	56.04	51.33	3.12	2.46	2.82	13.61	12.26	16.14	1.24	1.67	1.41	16.6	1.67	17.02	5.68
YFL034C-B	40.4	27.11	40.4	22.04	93	91.93	76.43	79.37	87.73	99.99	83.52	88.85	19.14	3.45	26.65	2.28	78.99	66.14	53.54	14.6	14.92	15.75	53.87	47.05	36.06	46.94	81.45	189.97	195.58	8.26	8.56	8.27	42.71	37.72	49.54	5.02	6.89	4.41	43.83	4.72	51.7	10.41
YFL034W	16.96	9.4	19.28	7.61	51.41	38.6	41.72	36.21	43.77	40.99	31.74	36.51	12.49	1.01	9.98	0.5	32.09	30.38	36.01	4.22	4.7	5.09	19.83	15.62	17.6	18.19	79.02	161.68	202.58	6.31	5.8	5.11	24.95	24.92	29.27	0.76	2.32	1.49	36.54	12.09	35.23	9.27
YFL036W	24.2	20.83	30.15	17.99	76.09	61.64	62.22	53.2	67.26	76.5	55.52	71.66	17.13	8.92	12.84	3.46	45.79	47.58	53.96	17.7	16.95	19.44	36.57	33.31	28.64	35.9	85.89	210.48	218.2	14.25	13.71	13.05	25.77	22.55	28.66	3.75	4.4	3.59	32.55	25.32	33.9	21.43
YFL037W	24.07	18.48	22.78	15.06	52.62	44.68	45.78	42.15	50.58	51.09	38.9	45.55	20.02	6.06	17.69	2.9	40.69	36.35	31.09	9.9	9.79	10.53	31.97	33.2	21.67	28.45	139.75	170.6	191.59	11.16	11.72	10.89	41.3	40.98	46.86	4.99	5.97	4.68	47.41	14.02	51.65	15.58
YFL038C	31.64	23.3	27.76	18.03	23.23	22.96	20.76	20.41	36.14	30.92	28.04	26.16	23.03	8.77	19.37	4.51	24.07	17.04	16.19	8.65	8.63	8.44	40.94	39.19	28.24	37.48	140.24	221.01	246.9	10.32	11.26	10.24	56.36	67.94	71.03	4.29	7.04	5.21	76.43	5.22	85.25	13.68
YFL039C	19.25	20.81	21.94	17.77	37.45	30.54	33.46	31.8	46.07	40.75	29.71	33.74	21.53	20.27	9.97	6.3	31.24	30.29	36.9	22.33	22.2	22.16	35.49	33.5	25.02	30.99	185.55	187.4	197.75	11.67	11.46	12.21	29.81	34.2	34.21	3.48	3.42	3.38	42.91	37.78	48.27	45.15
YFL041W	9.01	5.58	11.27	4.89	30.55	24.04	24.82	21.35	28.91	30.1	22.06	27.59	6.28	2.03	5.22	0.95	18.35	20.72	19.33	4.74	4.62	5.72	10.2	7.91	8.89	9.18	51.4	98.97	116.94	2.82	2.49	3.04	25.97	27.99	35.02	0.62	1.45	0.62	39.62	3.35	41.21	3.05
YFL042C	11.81	4.73	12.43	4.44	30.53	25.29	26.3	22.62	32.54	33.77	26.81	27.59	8.34	0.26	7.5	0.21	22.48	20.4	18.84	1.66	1.66	2.14	13.06	11.75	11.36	11.56	52.89	107.57	127.86	3	2.54	2.5	20.38	22.96	28.05	0.76	1.09	0.59	30.71	3.68	36.8	4.16
YFL044C	5.97	1.59	6.45	1.36	14.04	15.31	11.92	12.33	17.11	16.78	14.41	13.89	2.75	0.07	3.8	0.08	9.66	10.13	6.52	0.47	0.62	0.67	7.36	5.62	3.99	5.32	18.33	35.62	41.31	0.59	0.7	0.52	6.17	7.3	8.26	0.17	0.34	0.1	9.09	0.87	11	0.68
YFL045C	9.22	10.03	8.83	9.78	16.46	20.19	19.54	19.03	18.2	16.38	14.63	15.06	8.09	11.14	6.17	3.72	16.19	15.93	9.5	13.06	14.38	13.48	20.24	15.18	11.06	17	45.87	52.66	59.87	2.3	2.21	2.19	8.87	10.5	11.97	1.06	1.17	1.07	13.74	3.4	16.57	5.24
YFL046W	14.19	7.06	14.67	6.76	17.15	15.51	13.63	14.24	19.2	18.38	16.22	16.05	9.21	0.52	9.27	0.48	15.25	11.16	10.42	1.38	1.73	1.19	18.61	17.86	16.59	20.48	37.77	71.55	75.77	1.61	1.8	1.82	18.07	17.05	20.86	0.43	0.71	0.46	25.58	3.72	27.57	5.01
YFL047W	30.41	19.11	33.51	14.9	61.66	45.15	46.68	44.2	56.17	57.72	44.62	49.84	17.03	1.2	19.42	0.91	42.11	40.81	39.32	4.85	4.94	5.37	33.05	27.51	26.68	31.66	91.19	232.02	235.14	10.64	9.96	9.65	29.39	30.04	36.05	1.89	2.77	1.99	38.35	4.22	42.25	4.81
YFL048C	9.21	6.76	10.98	4.98	16.96	13.46	16.29	11.71	16.58	15.26	12.18	13.81	5.74	0.44	5.09	0.24	14.04	12.97	14.94	2.09	2.04	2.03	10.49	8.9	8.42	10.52	36.13	70.99	69.53	3.85	3.57	3.96	11.91	13.01	15.47	1.25	1.2	1.16	14.11	2.12	15.94	2.84
YFL049W	11.95	7.82	12.2	5.99	27.87	22.74	22.93	21.24	29.21	26.69	20.99	25.62	6.74	0.69	6.28	0.34	18.18	17.93	17.55	2	2.51	3	14.46	12.6	12.36	14.92	42.4	99.29	109.38	4.7	4.21	4.33	13.73	13.71	17.09	1.1	1.5	1.06	19.97	2.73	20.73	5.43
YFL050C	3.76	2.2	4.22	1.99	12.75	10.23	12.15	9.23	11.77	14.25	9.24	12.37	2.06	0.24	1.53	0.16	6.08	6.66	7.16	0.67	0.7	0.88	4.23	3.22	4.3	3.56	14.86	38.19	41.1	2.02	1.69	1.94	4.01	2.74	4.33	0.36	0.34	0.25	4.29	0.89	4.44	1.03
YFL052W	0.7	0.7	0.57	0.22	1.47	1.28	1.51	1.15	1.99	2.42	1.34	1.62	0.23	0.16	0.15	0.06	0.53	0.61	0.75	0.19	0.31	0.19	0.47	0.96	0.38	0.76	2.5	5.55	5.11	1.19	1.17	1.05	0.29	0.28	0.32	0.04	0.01	0.04	2.7	0.84	2.98	1.11
YFL054C	1.87	1.37	2.47	0.68	6.35	6.03	6.73	5.6	7.54	7.38	5.13	5.37	1.46	0.43	0.86	0.08	4.83	4.43	4.2	0.76	0.63	0.88	1.29	1.44	0.85	1.15	17.32	32.88	38.58	1.4	1.55	1.29	2.41	1.93	3.81	0.21	0.15	0.1	9.07	1.19	10.09	1.08
YFL055W	1.38	1.09	1.2	0.68	4.74	3.75	3.02	3.63	3.93	4.69	2.9	3.73	0.16	0.12	0.39	0.36	2.72	2.43	2.65	1.51	1.28	1.51	2.23	1.32	2.07	1.81	2.5	5.63	6.51	0.83	0.75	0.82	0.8	0.7	0.61	0.22	0.28	0.3	1.21	0.09	1.74	0.17
YFR001W	31.96	19.84	29.92	15.52	35.9	31.94	25.95	26.66	44.61	43.79	38.59	39.51	11.83	2.73	15.97	1.99	27.29	21.49	19.64	4.22	4.25	4.62	38.85	29.99	35.31	50.26	60.84	124.21	123.52	3.61	3.86	3.26	30.51	36.83	37.79	1.37	2.13	1.45	36.24	4.13	35.56	5.31
YFR002W	28.25	23.76	32.31	19.74	59.84	45.53	50.22	43.67	60.43	55.67	45.04	51.81	18.48	8.15	15.03	3.75	37.56	37.92	44.11	13.31	13.61	16.46	38.74	31.57	32.61	40.26	110	232.02	266.93	14.73	14.25	14.28	33.28	34.71	40.75	5.65	8.78	6.07	43.85	18.67	43.18	20.59
YFR003C	10.84	4.28	11.34	4.5	7.72	7.45	6.81	5.83	11.16	9.62	7.79	8.67	7.53	0.96	7.07	0.74	10.48	6.95	6.99	1.41	1.86	1.73	13.06	15.05	7.97	13.66	27.96	49.68	52.52	1.71	1.39	1.03	8.69	10.89	12.09	0.19	0.3	0.23	21.51	4.67	22.62	5.31
YFR004W	28.16	17.13	28.16	14.47	33.4	28.17	26.15	27.23	38.16	36.36	29.45	32.3	17.13	2.85	17.6	1.77	30.9	22.72	23.65	5.42	5.66	6.49	39.4	39.58	26.36	36.85	77.53	153.07	155.8	4.71	3.87	4.46	29.11	31.83	37.97	1.55	2.62	1.57	41.64	11.45	45.93	13.88
YFR005C	4.45	3.82	4.66	2.94	12.3	10.71	11.37	10.4	12.2	13.18	9.95	11.2	2.47	1.38	2.81	1.01	7.64	7.04	7.86	3.25	3.87	4.16	5.66	7.38	6.14	8.61	13.77	24.28	24.02	0.96	0.98	1.08	3.21	4.38	4.8	0.21	0.29	0.21	5.53	1.25	5.55	1.35
YFR006W	26.6	25.21	25.26	20.97	65.61	58.33	55.96	51.34	56.33	64.91	51.58	64.15	16.86	12.7	21.52	10.46	46.36	44.17	41.1	27.2	27.89	31.13	35.6	39.76	28.55	42.17	58.71	110.7	119.11	4.64	3.35	3.96	16.16	20.06	19.71	0.65	0.84	0.65	26.82	9.05	27.87	8.42
YFR007W	2.76	1.1	3.08	0.96	5.61	5.75	4.61	5.12	6.53	6.05	5.04	5.14	2.22	0.07	1.37	0.05	4.53	4	3.52	0.39	0.41	0.54	3.1	3.13	2.65	3.14	8.47	11.01	14.64	0.34	0.34	0.5	2.7	3.6	3.38	0.04	0.08	0.06	3.78	0.3	4.87	0.24
YFR008W	2.51	1.29	2.71	1.06	4.06	4.65	4.26	4.55	4.84	5.7	3.99	4.28	1.27	0.08	1.87	0.06	4.34	3.54	3.14	0.23	0.35	0.3	3.45	2.65	2.46	2.45	7.95	16.96	18.56	0.37	0.24	0.29	3.23	3	4.5	0.08	0.09	0.05	5.07	0.35	5.32	0.48
YFR009W	25.94	16.17	29.15	14.35	54.6	40.47	44.88	36.14	59	64.01	40.96	55.35	17.96	3.43	13.19	1.36	29.61	29.45	35.22	5.32	5.2	5.54	38.38	34.02	27.43	35.57	123.07	242.96	232.83	8.8	8.68	8	35.35	38.21	43.66	2.66	4.9	2.63	42.18	9.61	42.42	10.99
YFR010W	29.41	21.52	28.35	18.16	40.56	35.8	36.62	36.35	39.99	43.34	32.08	39.67	17.81	9.31	16.59	5.08	38.18	34.4	31.49	17.91	17.68	20.15	34.42	33.52	24.08	29.23	88.87	175.74	187.24	9.13	8.54	8.37	27.04	28.39	31.61	3.04	3.56	2.94	37.27	10.39	36.82	13.63
YFR011C	14.66	7.19	13.13	5.94	21.28	19.11	15.37	15.82	16.48	18.78	14.97	19.24	7.88	0.98	9.61	0.62	17.31	14.61	10.65	1.74	2.63	2.76	19.62	17.37	12.22	18.64	34.19	67.45	75.91	1.23	0.84	0.87	18.08	22.04	24.44	0.49	1.3	0.58	22.94	1.62	25.17	2.98
YFR013W	15.35	9.4	16.92	8.24	42.93	37.5	36.39	32.35	41.88	46.11	34.49	38.13	9.32	0.73	8.05	0.36	26.88	26.13	27.12	2.84	3.21	2.91	16.26	12.32	13.9	15.98	74.43	157.74	166.87	6.54	5.73	5.69	18.15	19.75	22.7	1.29	1.97	1.02	28.36	4.28	29.43	4.16
YFR014C	9.26	6.98	9.78	5.8	21.62	18.71	17.48	16.83	17.24	20.78	14.28	17.91	5.63	1.88	6.6	1.8	17.53	15.63	14.66	6.12	5.56	7.9	11.47	13.62	8.7	13.34	34.23	70.19	71.42	1.57	1.79	1.54	10.08	10.73	12.68	0.28	0.4	0.25	21.64	3.11	25.2	5.17
YFR015C	2.7	5.31	4.16	3.52	4.56	4.08	6.12	5.9	5.97	7.96	3.1	3.78	14.89	18.92	3.45	2.28	4.91	4.32	6.29	5.94	5.24	6.17	5.7	9.67	1.46	3.81	71.52	119.47	149.5	2.62	2.87	2.32	1.9	1.68	2.45	0.09	0.15	0.14	47.44	47.08	52.16	52.82
YFR016C	32.6	13.08	39.47	13.69	84.33	65.01	69.61	57.72	72.56	77.14	55.23	61.97	34.34	7.47	20.33	2.46	44.87	41.56	46.55	7.85	7.72	8.63	58.68	56.43	37.49	49.23	206.42	421.84	464.26	6.97	6.91	6.41	57.96	58.5	72.81	1.37	2.59	1.65	93.43	16.42	104.11	17.85
YFR017C	2.67	3.84	2.4	2.5	2.98	3	3.57	3.24	4.33	5.7	3.73	3.09	5.62	10.64	2.69	2.49	4.87	3.79	3.66	8.52	6.28	8.24	3.15	5.17	1.12	2.6	9.18	16.08	18.42	0.64	0.93	0.73	2.65	2.05	3.1	0.11	0.09	0.07	16.68	5.35	19.17	16.37
YFR018C	3.38	3.11	3.33	2.58	5.48	5.58	4.52	4.89	8.06	7.88	6.45	6.89	2.13	0.84	1.61	0.26	4.83	4.54	3.8	1.33	1.3	1.64	1.64	2.29	1.01	1.48	15.6	24.68	22.62	0.24	0.38	0.34	2.92	2.84	3.77	0.04	0.1	0.05	6.48	0.63	6.94	0.87
YFR019W	45.89	42.92	52.91	34.68	206.01	172.18	174.72	163.89	161.06	191.08	139.29	171.81	38.64	12.05	34.23	5.07	141.54	143.9	127.47	35.07	33.74	36.52	37.4	32.06	28.51	30.45	249.6	576.92	655.01	15.32	15.42	13.63	72.23	70.99	93.02	1.86	5.16	1.99	107.41	14.04	122.48	22.2
YFR020W	2	1.02	2.52	1	8.16	5.68	5.33	5.85	7.76	7.35	4.95	5.59	1.12	0.07	1.39	0.06	3.34	3.04	3.52	0.26	0.34	0.13	1.88	1.14	1.7	1.32	9.89	25.16	27.87	0.47	0.59	0.45	2.91	2.6	3.65	0.06	0.13	0.11	5.02	0.5	6.33	0.54
YFR021W	6.13	3.78	8.04	2.91	20.36	16.71	16.73	15.15	18.98	18.67	14.3	16.66	3.62	0.31	4.17	0.15	13.67	11.82	12.27	1.48	1.68	1.81	8.35	7.18	6.03	6.7	27.73	58.21	61.2	1.48	1.83	1.63	8.6	8	10.65	0.32	0.5	0.31	12.04	1.69	12.96	1.75
YFR022W	2.54	1.83	3.14	1.91	13.06	10.61	10.44	9.73	17.41	18.56	12.14	14	3.08	1.5	1.5	0.31	7.44	7.13	8.38	2.22	2.28	2.83	2.72	2.83	1.69	2.27	13.66	30.47	30.81	2.53	2.4	2.35	3.28	3.14	3.54	0.4	0.57	0.46	5.96	1.08	7.62	1.32
YFR024C-A	10.14	5.37	12.27	4.88	20.31	18.61	16.82	14.58	20.56	19.44	13.05	13.36	8.12	1.03	6.14	0.48	16.74	13.93	16.12	3.28	2.77	3.21	12.03	12.28	9.9	10.88	56.81	87.95	102.1	2.25	2.45	2.34	22.71	22.69	26.96	0.87	1.23	0.76	30.36	7.73	31.38	5.01
YFR025C	4.32	1.66	4.4	1.41	13.99	10.81	9.25	9.05	15.35	14.46	10.35	11.07	3.27	0.14	3.02	0.11	9.72	7.7	8.56	0.63	0.44	0.63	6.92	6.31	6.36	7.01	23.4	39.96	45.31	0.2	0.22	0.2	9.33	9.8	12.66	0.16	0.32	0.07	9.45	0.65	11.1	1.17
YFR026C	0.47	0.19	0.57	0.26	1.82	2	1.57	1.58	1.54	1.39	1.18	1.2	0.41	0.27	0.28	0.04	1.23	1.07	1.08	0.86	0.51	1.14	0.48	0.62	0.44	0.66	2.91	6.11	6.86	0.22	0.15	0.13	0.87	0.77	0.97	0.05	0.01	0.02	1.03	0.07	1.59	0.35
YFR027W	5.72	2.84	6.09	2.25	9.48	7.95	8.5	9.07	8.77	7.99	6.56	7.05	3.01	0.48	3.64	0.31	7.27	5.34	4.83	1.2	1.23	1.4	6.51	5.24	4.65	4.56	14.45	37.79	38.23	1.08	0.95	0.83	6.36	5.93	7.43	0.13	0.26	0.08	8.77	1.02	11.75	1.38
YFR028C	17.75	13.33	21.01	11.19	41.98	33.94	34.1	33.45	41.53	39.31	30.09	34.91	12.31	2.08	9.65	1.16	29.24	25.61	30.88	6.21	5.76	6.77	21.58	17.63	17.71	20.83	71.14	160.95	166.24	4.28	3.97	4.26	25.1	27.41	31.94	1.66	2.75	1.52	29.01	7.94	31.91	8.44
YFR029W	13.6	7.3	15.45	6.17	56.7	46.25	41.78	39.7	51.39	54.63	38.97	42.65	6.53	0.68	6.92	0.38	34.47	32.74	31.84	3.57	3.52	3.17	19.75	17.65	16.71	19.36	60.66	139.33	143.06	5.49	5.13	5.07	31.34	29.73	37.14	1.7	2.43	1.86	31.44	3.61	37.13	6.6
YFR030W	16.33	16.51	17.27	10.53	26.21	19.89	23.25	18.83	18.42	20.54	13.81	16.44	3.42	1.84	7.74	3.57	17.1	18.43	20.95	11.98	9.02	11.33	39.52	23	36.18	31.05	18.44	30.63	31.72	1.88	2.2	2.4	10.74	8.26	6.28	0.86	0.78	0.65	4.75	2.75	5.27	1.24
YFR031C	22.42	10.18	26.77	9.78	60.55	46.78	49.61	41.53	44.51	48.56	34.13	41.78	12.89	0.93	13.38	0.55	29.78	30.29	36.55	2.76	2.65	2.85	29.31	23.76	27.87	30.71	95.33	235.48	238.85	9.49	9.01	8.09	33.82	33	41.86	2.23	3.26	2.67	45.61	6.17	45.1	5.74
YFR031C-A	34.67	27.51	35.18	21.89	69.08	56.51	58.36	53.47	70.92	60.73	50.17	51.33	32.01	17.49	20.01	7.74	57.32	42.65	49.64	32.96	28.55	33.33	54.03	47.08	41.43	53.58	208.13	204.45	207.34	15.61	14.3	14.65	59.18	60.66	70.94	7.01	7.82	7.01	73.38	39.64	73.14	30.1
YFR032C	0.19	0.22	0.09	0.11	0.53	0.6	0.61	0.48	0.5	0.56	0.42	0.4	0.08	0.3	0.11	0.08	0.43	0.36	0.23	0.29	0.25	0.28	0.14	0.12	0.12	0.15	0.22	0.88	0.42	0.92	0.82	0.99	0.07	0.05	0.08	0.54	0.37	0.79	0.22	0.15	0.25	0.14
YFR032C-A	34.18	30.93	28.03	22.7	10.9	10.38	8.18	11.16	13.13	8.47	9.57	9.1	20.57	18.16	19.18	10.68	10.95	7.77	7.48	7.3	9.51	10.2	43.85	48.88	25.06	37.33	148.48	73	73.32	8.82	8.54	6.96	29.3	29.34	31.39	3.42	3.33	3.28	39.64	18.35	40.58	23.77
YFR032C-B	8.19	8.79	6.54	5.02	28	32.04	24.12	30.95	28.86	27.17	27.64	24.32	2.86	2.81	7.85	3.59	29.24	22.18	17.29	18.01	20.13	20.95	12.18	13.21	7.93	11.96	12.13	15.76	15.62	0.88	0.76	1.02	4.56	3.86	6.12	0.57	0.57	0.9	6.34	1.56	8.55	5.92
YFR033C	94.4	134.64	110.86	107.56	155.05	116.24	126.96	117.05	137.75	127.42	110.33	101.81	88.26	132.62	65.85	50.19	160.04	104.04	108.79	159.17	139.69	165.7	106.69	115.6	81.35	119.77	127.28	260.4	283.53	4.52	4.27	3.96	59.37	51.26	59.24	0.77	1.92	0.95	84.55	158.97	94.61	119.94
YFR034C	42.37	42.97	40.32	37.5	84.7	83.6	71.61	76.89	95.82	89.66	78.3	78.66	14.45	14.06	30.02	14.36	78.05	63.03	58.4	50.32	44.64	53.09	35.48	30.63	29.11	34.43	49.46	122.28	113.3	2.67	2.35	2.3	44.21	37.42	39.8	1.1	1.35	0.79	34.46	9.91	37	14.1
YFR036W	4.44	1.47	3.33	1.19	10.98	10.01	7.28	8.08	11.27	10.09	8.54	8.06	2	0.34	2.45	0.28	7.78	6.13	4.9	1.15	1.01	1.32	4.82	3.57	3.24	4.2	10.6	20.1	15.06	0.19	0.16	0.21	6.61	6.23	7.61	0.04	0.21	0.04	6.99	0.5	7.11	1.33
YFR037C	36.34	26.76	39.54	22.34	59.29	45.2	49.87	44.91	69.35	63.47	48.07	48.59	26.98	3.3	21.74	1.91	48.11	39.35	45.12	9.04	8.56	8.72	45.07	34.02	37.89	40.53	144.64	288.06	309.16	13.56	12.81	13.05	62.77	64.31	70.48	5.35	7.59	5.02	70.41	22.18	72.08	19.4
YFR038W	19.69	12.04	21.42	10.33	58.81	43.5	49.61	44.66	44.83	46.91	36.36	45.71	9.72	1.45	11.47	1.11	37.43	36.88	35.36	4.58	5.38	5.11	22.22	19.21	21.98	25.55	75.18	170.6	180.03	7.05	5.99	6.29	25	25.43	32.85	1.4	2.63	1.16	29.25	4.24	32.33	4.73
YFR039C	14.08	8.75	14.97	7.91	23.86	18.91	20.67	18.48	23.39	22.61	17.76	20.49	6.28	0.85	7.64	1.32	17.59	16.45	16.12	4.87	4.96	5.09	21.66	18.22	21.32	24.55	47.07	104.19	111.97	9.23	8.52	8.53	16.23	20.9	22.38	0.8	1.85	0.76	21.78	4.69	24.21	4.92
YFR040W	41.9	37.19	50.02	32.39	120.68	88.3	104.14	85.11	98.84	110.4	74.4	100.82	26.09	11.57	25.77	5.8	68.84	66.73	82.3	21.19	25.07	28.28	60.73	50.19	49.22	57.02	155.28	381.88	424.14	22.55	20.01	21.39	55.31	55.87	68.39	8.26	13.2	9.02	65.47	38.67	72.41	39.25
YFR041C	7.45	4.94	9.01	3.98	9.17	8.28	7.86	7.9	9.9	9.38	7.41	8.06	5.63	0.72	4.43	0.61	9.04	6.5	8.21	1.98	2.39	2.55	14.36	12.18	12.83	13.53	34.64	74.61	69.6	2.19	2.36	2.15	12.27	14.17	17.54	0.38	0.82	0.46	18.43	4	20.53	5.3
YFR042W	5.77	3.51	6.11	3.63	4.93	3.68	3.19	4.11	4.66	4.69	4.04	5.32	2.19	0.43	3.15	0.61	5.66	4.34	3.64	2.09	2.45	3.37	7.94	8.71	6	10.08	16.09	30.79	29.55	0.96	1.12	1.06	5.8	5.86	6.54	0.23	0.34	0.18	7.18	0.71	7.31	1.79
YFR043C	2.92	0.96	3.04	0.9	4.21	3.88	3.45	3.31	4.69	4.69	3.77	4.63	1.33	0.03	1.44	0.02	3.06	2.02	1.5	0.24	0.18	0.19	3.47	2.88	2.64	3.62	8.51	17.85	17.09	0.44	0.43	0.49	3.14	3.68	4.25	0.36	0.17	0.29	4.21	0.28	5.15	0.48
YFR044C	7.37	6.32	7.68	5.88	15.51	11.98	13.45	13.71	15.6	15.32	12.51	15.17	6.45	1.72	5.23	0.71	11.38	11.34	10.49	3.31	3.54	4.01	8.56	7.32	6.19	9.43	41.69	40.84	44.4	3.84	3.29	3.66	5.88	7.33	7.64	1.07	1.08	0.92	6.69	2.06	7.31	1.7
YFR045W	2.31	1.41	3.16	1.33	4.21	4.1	3.71	3.49	4.56	4.45	3.48	3.81	1.74	0.16	1.63	0.09	3.51	3.25	3.12	0.42	0.68	0.54	2.36	2.45	1.63	2.05	8.36	16.16	15.55	0.63	0.76	0.48	2.87	2.3	3.06	0.08	0.09	0.13	3.48	0.45	4.49	0.68
YFR046C	4.81	1.62	4.35	1.41	9.77	9.33	8.84	8.13	11.04	9.22	8.28	9.18	2.28	0.13	2.65	0.05	7.7	6.23	4.5	0.36	0.48	0.67	6.46	4.85	4.57	6.14	12.06	26.37	28.5	0.51	0.4	0.41	5.29	5.24	6.42	0.09	0.17	0.04	5.48	0.32	6.28	0.62
YFR047C	1.95	0.62	2.09	0.61	4.27	3.05	2.93	2.87	3.78	4.16	3.01	2.82	1.17	0.23	0.88	0.08	2.93	1.89	2.23	0.45	0.32	0.41	0.98	0.96	0.76	1.23	14.67	19.62	18.21	0.69	0.9	0.76	3.09	3.17	4.48	0.1	0.2	0.14	6.53	0.61	5.7	0.51
YFR048W	9.34	5.31	10.53	4.54	23.65	17.26	19.08	15.84	22	22.85	16.82	17.43	4.65	0.31	4.61	0.24	11.53	11.04	12.72	1.04	1.41	1.29	8.16	6.7	7.78	8.31	37.89	86.75	82.21	3.12	2.81	2.39	9.69	10	12.92	0.35	0.97	0.38	14.82	4.31	16.22	4.9
YFR049W	4.91	3.1	5.44	2.16	6.03	5.2	3.94	4.41	5.59	5.97	4.75	5.4	2.92	0.32	3.06	0.19	6.76	5.14	3.92	1.31	1.55	1.32	5.82	6.86	5.21	7.25	16.09	24.12	22.9	0.63	0.54	0.52	5.35	6	7.17	0.13	0.23	0.16	9.2	0.86	9.48	1.24
YFR050C	27.91	19.07	27.76	15.09	42.06	35.8	34.62	35.47	44.51	49.3	37.79	41.99	17.28	3.68	19.25	2.53	39.85	30.24	29.05	9.8	9.93	10.79	38.4	38.59	21.4	33.2	81.52	138.6	150.2	5.63	4.79	4.68	28.96	31.3	34.73	2.29	3.53	1.79	38.56	9.04	40.28	15.55
YFR051C	29.92	23.73	32.55	20.07	61.21	52.18	51.81	46.45	68.5	65.74	52.6	55.08	24.71	6.49	17.05	2.52	45.83	39.99	43.61	11.47	10.64	11.87	38.38	34.57	26.14	30.95	148.75	250.51	270.29	11.54	12.58	10.88	44.36	46.98	54.58	3.97	4.84	3.38	58.75	17.87	58.46	18.36
YFR052W	8.96	6.19	10.01	5.48	16.3	12.93	12.47	13.2	18.93	17.71	12.74	13.38	5.87	1.41	4.78	0.81	13.27	9.63	10.56	3	3.47	3.78	13.22	11.78	9.93	11.62	40.16	67.69	70.02	3.82	3.53	2.87	11.66	13.14	14.3	0.93	1.45	0.79	17.41	4.22	17.81	5.06
YFR053C	16.5	28.19	16.03	14.28	22.07	19.21	28.21	24.87	9.4	16.35	7.36	8.59	42.52	56.95	10.57	9.16	34.6	28.08	35.43	44.7	36.51	45.02	20.29	39.1	7.02	19.32	98.84	152.19	209.23	2	2.34	1.82	3.71	3.4	5.37	0.18	0.38	0.37	109.13	154.8	121.57	152.54
YFR055W	5.93	4.66	6.32	4.44	13.17	11.03	11.63	10.93	20.36	18.06	16.64	19.72	3.74	2.01	4.65	1.56	6.38	6.63	5.44	1.95	3	3.43	5.38	3.59	4.92	5.07	12.36	27.74	25.49	0.95	0.58	0.57	4.18	3.44	3.52	0.11	0.16	0.05	3.4	1.1	3.86	0.98
YGL001C	2.36	1.31	2.44	1.11	7.72	6.53	5.68	5.65	7.61	7.96	6.27	7.13	2.03	0.55	1.35	0.23	4.96	3.91	5.3	1.05	1.3	1.1	3.58	3.11	2.95	3.77	16.39	24.28	25.28	0.4	0.36	0.54	3.31	4.38	4.42	0.08	0.09	0.03	6.58	1.26	7.24	2.14
YGL002W	3.23	1.58	3.62	1.25	4.21	3.55	3.86	3.6	5.04	4.42	3.59	3.57	2.19	0.12	1.62	0.04	3.23	2.93	2.96	0.42	0.24	0.47	4.35	4.55	3.07	3.81	8.73	15.19	17.09	0.63	0.46	0.29	3.28	3.28	4.01	0.03	0.13	0.09	4.7	0.58	5.73	0.65
YGL003C	13.04	10.13	13.71	8.47	36.24	31.29	30.24	30.61	32.54	37.53	27.77	30.33	4.94	1.13	8.15	1.31	24.18	21.22	21.07	5.89	6.31	7.36	14.25	15.04	11.77	13.8	32.59	71.23	73.67	4.02	3.71	3.85	11.42	10.91	13.31	1.33	1.5	1.24	13.41	5.21	16.22	5.49
YGL004C	7.38	3.41	8.93	3.14	14.75	13.68	14.29	12.74	15.88	17.07	12.6	14.79	4.67	0.26	4.53	0.19	12.44	11.11	9.34	0.86	1	0.91	10.06	10.02	6.13	8.58	29.19	60.14	70.02	1.68	1.59	1.73	12.1	13.38	16.89	0.67	0.7	0.71	14.44	1.32	16.92	2
YGL005C	8.78	4.39	9.57	3.9	17.94	15.31	12.99	12.54	15.3	15.93	10.93	12.83	5.51	0.18	5.76	0.18	14.06	12.61	9.88	1.07	1.14	1.45	8.82	8.94	7.24	7.89	34.42	77.98	92.64	1.77	1.76	1.62	12.24	12.29	15.59	0.54	0.84	0.59	16.38	2.16	17.86	2.97
YGL006W	13.08	11.35	18.57	11.18	28.87	22.84	25.8	24.06	25.3	27.14	17.56	21.69	19.77	12.19	9.25	2.92	27.39	24.49	31.86	14.39	14.34	17.58	19.3	22.4	12.3	17.03	71.85	129.76	166.59	3.99	4.53	3.67	18	17.38	24.38	0.76	1.03	0.67	29.28	18.87	34.07	19.99
YGL006W-A	1.26	0.81	1.12	1.17	2.08	2.13	1.3	1.68	1.29	2.24	1.87	2.26	0.72	0.68	1.07	0.3	1.66	1.8	1.27	0.62	1.08	1.16	1.8	2.72	0.46	1.75	4.52	5.23	4.48	0.27	0.12	0.14	0.92	1.14	1.56	0.07	0.01	0.07	1.78	0.19	1.92	1.27
YGL008C	160.11	199.21	179.79	178.81	465.68	331.59	440.04	339.09	341.96	350.82	267.31	337.24	263.07	316.67	103.24	77.44	308.38	327.08	384.77	231.28	250.34	259.44	182.2	170.01	143.66	174.07	858.58	1347.59	1549.77	44.62	44.92	42.52	262.95	303.41	348.49	25.19	35.93	30.93	468.13	518.14	498.98	432.04
YGL009C	5.67	4.24	9.51	6.68	50.49	41.8	47.38	39.05	69.38	74.58	45.82	53.96	20.74	15.7	3.4	0.99	18.84	18.93	19.75	7.85	8.11	9.21	15.73	17.17	12.33	13.35	39.38	94.06	81.16	2.53	2.74	2.57	35.69	40.6	27.62	3.28	5.09	1.69	9.12	16.62	9.33	12.2
YGL010W	3.71	2.77	3.14	1.78	3.53	4.43	3.74	4.11	4.84	4.85	4.22	3.86	1.04	0.49	2.01	0.34	5.19	3.16	3.38	1.46	1.66	1.51	2.7	3.02	1.8	2.51	6.42	17.37	15.62	1.3	1.18	0.77	2.12	2.21	3.24	0.2	0.23	0.27	4.48	0.61	6.03	1.09
YGL011C	17.95	10.54	17.53	8.88	23.7	19.69	18.35	16.58	27.29	25.7	20.17	20.49	10.25	1.14	9.3	0.88	20.44	16.81	15.77	3.29	3.28	3.39	24.82	21.65	16.7	18.79	66.37	103.31	109.66	3.63	3.29	3.01	20.58	23.87	24.87	1.52	2.22	1.31	29.47	6.23	31.7	8.93
YGL012W	7.4	8.66	8.74	8.89	16.78	13.41	15.6	15.2	17.69	15.21	12.25	12.61	10.27	13.18	5.14	3.65	13.8	12.84	14.64	13.45	15.4	13.42	10.12	10.61	8.47	12.38	52.56	64.24	60.92	2.89	2.71	2.72	14.36	13.7	18.81	0.85	1.16	0.85	26.01	23.13	27.34	28.49
YGL013C	24.62	14.3	25.83	12.54	80.01	61.11	68.71	56.39	66.78	70.34	50.75	62.16	14.75	1.53	13.41	0.71	49.45	49.17	52.58	5.97	6.48	6.39	25.37	21.72	21.28	22.81	110.9	280.02	299.42	6.69	6.58	6.43	38.41	36.69	45.1	1.22	2.17	1.08	44.85	7.18	46.99	9.2
YGL014W	65.71	53.95	78.07	42.67	314.44	249.67	257.17	227.19	266.1	324.63	242.89	304.64	40.76	10.97	40.76	5.16	188.07	204.06	193.06	43.75	40.89	45.86	89.24	71.11	74.54	83.9	249.53	580.94	635.61	31.26	30.13	32.44	86.82	90.56	108.82	14.83	21.34	16.94	105.19	13.16	114.93	29.37
YGL016W	11.26	9.57	11.96	7.98	18.36	14.48	13.28	14.01	16.94	19.44	14.99	19.66	6.28	0.64	6.36	0.48	11.31	11.66	10.25	1.67	2.2	2.09	10.14	9.62	6.33	9.31	28.26	45.34	46.57	6.49	5.79	6.07	7.63	7.79	9.7	2.31	2.67	2.35	11.52	2.58	12.99	3.43
YGL017W	4.01	1.63	4.1	1.67	8.4	7.8	7.07	5.69	9.88	9.43	7.36	8.12	2.54	0.06	1.9	0.05	5.7	5.25	5.89	0.45	0.34	0.5	4.82	3.39	3.57	3.48	19.63	34.09	36.97	1.21	1.23	1.22	5.95	6.42	7.31	0.17	0.47	0.29	8.31	1.26	8.95	1.24
YGL018C	2.92	1.2	2.93	1.01	4.42	3.8	2.61	3.05	4.56	3.52	3.68	3.43	1.81	0.08	1.29	0.02	3.85	2.27	2.23	0.26	0.28	0.35	2.96	1.55	2.43	2.29	11.09	21.47	22.97	0.68	0.76	0.82	5.63	6.82	6.38	0.06	0.2	0.11	6.67	0.45	6.58	0.84
YGL019W	16.79	9.44	15.99	8.4	25.07	20.06	17.05	16.88	26.92	26.77	21.19	23.76	10.3	0.71	9.45	0.36	20.29	16.27	15.46	2.79	2.52	2.8	22.86	18.65	14.41	17.82	52.07	88.11	103.57	2.58	2.2	2.57	21.76	24.55	26.85	1.59	2.19	1.85	29.77	5.43	29.61	5.16
YGL020C	7.68	3.77	7.71	3.73	9.35	8.58	8.09	7.78	11.16	10.2	8.81	8.94	4.15	0.28	4.41	0.18	8.61	7.36	5.51	0.99	1.1	1.16	8.97	8.19	7.42	9.24	20.38	40.6	42.43	1.65	1.48	1.3	7.56	8.37	10.41	0.43	0.67	0.51	11.25	1.34	11.53	2.49
YGL021W	31.43	22.35	37.35	19.22	128.53	102.64	109.16	95.44	124.67	138.42	96.28	112.77	27.07	15.59	20.4	5.04	69.27	65.8	68.88	28.4	28.59	31.86	59.27	54.05	46.42	56	160.84	438.32	474.27	15.85	15.07	14.79	64.23	63.29	88.16	5.82	9.57	6.64	108.48	15.51	119.1	15.52
YGL022W	17.52	14.5	22.47	12.38	54.57	41.2	42.53	36.57	50.23	52.95	34.58	39.97	14.27	1.73	9.02	0.66	36.01	36.56	41.9	6.39	6.17	6.52	17.83	11.87	17.33	14.86	106.6	156.61	176.39	8.93	9.03	9.15	31.99	30.55	36.47	3.49	6.14	3.96	33.27	13.68	38.36	9.07
YGL023C	26.86	16.55	31.25	12.64	79.96	64.86	59.96	56.37	71.27	74.39	52.2	53.19	17.51	0.74	15.28	0.43	55.36	44.88	41.13	5	4.03	4.96	24.23	17.65	22.81	20.6	116.05	255.18	286.89	10.77	9.06	10.08	51.63	55.14	64.22	3.02	4.48	3.24	65.55	9	68.27	9.06
YGL025C	21.69	13.8	22.09	11.03	53.81	44.6	38.94	39.97	56.17	51.7	43.77	44.14	13.74	0.76	14.18	0.51	41.11	31.15	31.02	5.01	4.41	5.13	24.65	21.49	19.39	21.08	64.57	151.79	170.65	6.03	5.95	6.43	31.51	32.44	36.54	2.76	3.3	2.53	36.3	5.15	39.42	8.71
YGL026C	16.07	12.34	19.43	11.98	54.97	41.4	47.49	41.17	57.03	58.44	48.59	55.35	13.71	7.34	10.85	4.51	29.56	28.97	36.62	14.59	13.75	17.8	34.72	26.79	36.64	41.73	153.9	223.34	251.25	15.59	15.4	15.88	38.33	42.97	44.84	5.87	6.09	6.55	44.01	22.68	45.12	20.02
YGL027C	7.22	3.21	9.59	3.44	18.83	13.63	15.22	14.07	14.97	14.7	9.93	12.75	5.16	0.35	3.67	0.19	9.93	10.07	12.97	0.6	0.86	0.78	9.25	6.65	7.19	8.48	55.43	79.03	91.24	3.57	3.2	2.69	12.73	12.91	14.66	1.2	1.03	1.23	17.89	2.4	18.29	1.95
YGL028C	62.69	83.74	72.78	73.66	442.71	367.74	404.75	368.78	296.82	367.36	274.32	370.77	41	73.39	49.57	45.68	215.65	233.4	261.48	181.69	194.42	214.13	95.2	106.72	86.08	102.53	110.86	293.44	290.67	4.56	3.93	3.68	57.19	48.51	71.43	11.28	18.08	14.05	51.17	27.35	62.68	68.68
YGL029W	26.9	10.61	22.77	7.44	36.82	31.72	26.67	27.71	55.59	52.74	45.33	47.47	9.68	0.82	13.41	0.79	24.73	17.59	14.45	2.27	2.04	2.22	42.13	29.7	35.17	39.5	52	112.96	105.18	3.09	3.39	3.01	31.49	36.46	40.38	1.62	2.01	1.91	29.23	0.89	28.1	1.11
YGL030W	18.73	14.49	14.53	12.14	36.48	45.15	34.04	32.63	28.12	34.33	32.37	38.56	8.32	6.04	14.34	5.95	33.99	28.63	23.6	23.24	27.95	30.74	24.63	28.15	23.62	33.08	37.18	55.47	60.85	3.69	2.92	3.31	10.89	9.38	13.45	1.61	1.44	1.56	15.95	8.55	20.03	16.4
YGL031C	16.89	9.33	14.51	8.77	18.73	14.23	13.89	14.74	19.18	13.4	12.56	12.43	10.61	4.36	9.04	2.7	14.31	10.11	10.28	5.05	6.78	6.64	21.64	25.08	19.06	23.23	75.7	54.91	48.53	3.97	3.64	3.81	13.67	13.85	15.98	1.62	1.43	1.27	17.51	4.89	15.26	4.06
YGL035C	31.8	35.65	31.09	25.37	160.61	142.63	138.39	132.8	115.57	130.59	99.56	111.28	22.18	27.34	21.62	10.7	107.89	95.77	98.26	89.86	80.04	105.02	42.18	40.63	32.68	44.15	101.15	250.19	267.91	5.34	6.27	5.79	35.91	28.27	40.63	0.79	1	0.55	79.42	25.34	82.15	50.66
YGL036W	21	18.06	24.28	15.99	54.55	44.35	44.85	42.52	50.08	55.19	41.49	49.15	18.04	11.25	14.5	4.72	45.15	42.99	39.93	18.58	20.4	21.42	30.45	36.97	17.93	27.31	98.92	243.68	273.93	11.8	10.65	9.86	28.93	28.69	36.41	1.51	1.69	1.6	47.17	12.85	58.69	32.43
YGL037C	35.15	48.14	45.57	39.43	21.28	24.46	25.75	23.86	21.17	30.04	20.01	19.32	53.94	75.9	34.4	26.82	51.62	31.9	30.97	60.12	50.86	62.71	54.31	81.34	15.05	32.64	115.79	148.81	164.77	4.56	4.99	3.87	30.59	37.76	41.7	0.82	1.06	0.83	85.41	62.88	91.28	126.11
[truncated: 3,636 more rows]

## Sheet: 2B
gene_id	Bdf1_DMSO	Bdf1_IAA	Bdf2_DMSO	Bdf2_IAA	WT	dbdf2	Bdf1/2_DMSO	Bdf1/2_IAA	Bdf1dbdf2_DMSO	Bdf1dbdf2_IAA	H2A.Z_DMSO	H2A.Z_IAA	Ssl2_DMSO	Ssl2_IAA	Toa1_DMSO	Toa1_IAA	Esa1_DMSO	Esa1_IAA
[truncated: 5,313 more rows]

## Sheet: 2C
gene_id	gene_name	class	TATA	Bdf1-deg	Bdf2-deg	dbdf2	Bdf1/2-deg	Bdf1-deg_dbdf2	H2A.Z-deg	Ssl2-deg	Toa1-deg	Esa1-deg	Taf1-deg	Taf13-deg	Spt3/7-deg	dspt7
[truncated: 4,883 more rows]

[truncated: 1 more sheets: 2D]
