# Supplementary material for: BET family members Bdf1/2 modulate global transcription initiation and elongation in Saccharomyces cerevisiae
Source: eLife. 2021 Jun 17;10:e69619. doi: 10.7554/eLife.69619 (PMC8266393; doi:10.7554/eLife.69619)
Supplement: Supplementary file 2. — Related to Figure 1. [file elife-69619-supp2.xlsx]

## Sheet: readme
Tables present results of PANTHER overrepresentation test on PANTHER GO-Slim Biological Process annotation data set with default settings (http://www.pantherdb.org). The analysis was done for 25% most BET sensitive genes in yeast (this work) and human (Winter et al., 2017) system. Only the most specific child terms are shown. General term column contains terms chosen by authors to facilitate comp…

## Sheet: yeast
last child term	all genes	regulated genes	expected	fold enrichment	p value	FDR	general term
TOR signaling	18	13	3.64	3.58	0.000832	0.0441	TOR signalling
cell cycle checkpoint	29	17	5.86	2.9	0.00101	0.0479	regulation of cell cycle
autophagy	39	22	7.88	2.79	0.000229	0.0176	autophagy
mRNA splicing, via spliceosome	69	35	13.94	2.51	2.69e-05	0.00618	RNA processing
DNA repair	102	44	20.61	2.14	7.06e-05	0.00811	DNA repair
vesicle-mediated transport	223	71	45.05	1.58	0.00104	0.0478	cellular transport
cellular protein modification process	380	109	76.77	1.42	0.00111	0.0494	protein modification

## Sheet: human
last child term	all genes	regulated genes	expected	fold enrichment	p value	FDR	general term
pseudouridine synthesis	12	8	1.88	4.25	0.00313	0.0318	RNA processing
spliceosomal snRNP assembly	16	10	2.51	3.98	0.00139	0.0165	RNA processing
positive regulation of autophagy	21	12	3.3	3.64	0.000848	0.0108	autophagy
cleavage involved in rRNA processing	17	9	2.67	3.37	0.00545	0.0461	RNA processing
maturation of 5.8S rRNA	21	11	3.3	3.34	0.00234	0.0256	RNA processing
positive regulation of Ras protein signal transduction	21	11	3.3	3.34	0.00234	0.0255	regulation of cell cycle
tRNA modification	46	22	7.22	3.05	5.65e-05	0.00122	RNA processing
maturation of LSU-rRNA	23	11	3.61	3.05	0.004	0.0361	RNA processing
nuclear-transcribed mRNA catabolic process, deadenylation-dependent decay	27	12	4.24	2.83	0.00428	0.0383	RNA processing
regulation of I-kappaB kinase/NF-kappaB signaling	46	20	7.22	2.77	0.000391	0.00566	NF-kappaB signaling
I-kappaB kinase/NF-kappaB signaling	58	25	9.1	2.75	7.48e-05	0.00146	NF-kappaB signaling
maturation of SSU-rRNA	37	15	5.81	2.58	0.00351	0.0333	RNA processing
TOR signaling	44	17	6.91	2.46	0.00389	0.0358	TOR signalling
positive regulation of NF-kappaB transcription factor activity	75	28	11.77	2.38	0.000234	0.0037	NF-kappaB signaling
autophagy	117	40	18.37	2.18	5.68e-05	0.00121	autophagy
protein dephosphorylation	88	29	13.81	2.1	0.00101	0.0125	protein modification
double-strand break repair	99	31	15.54	1.99	0.00178	0.0202	DNA repair
regulation of cellular response to stress	80	25	12.56	1.99	0.00398	0.0362	DNA repair
negative regulation of intracellular signal transduction	91	28	14.29	1.96	0.0029	0.0298	signal transduction
protein polyubiquitination	117	34	18.37	1.85	0.00262	0.0278	protein modification
endosomal transport	113	32	17.74	1.8	0.0048	0.0414	cellular transport
negative regulation of transcription by RNA polymerase II	227	63	35.63	1.77	0.000131	0.00232	Pol II transcription
mitochondrion organization	163	43	25.59	1.68	0.00395	0.0361	mitochondrion organization
ubiquitin-dependent protein catabolic process	283	70	44.43	1.58	0.000961	0.012	protein modification
positive regulation of transcription by RNA polymerase II	232	57	36.42	1.57	0.00321	0.0322	Pol II transcription
transcription by RNA polymerase II	1635	381	256.66	1.48	2.69e-12	1.2e-10	Pol II transcription
intracellular protein transport	536	113	84.14	1.34	0.00519	0.044	cellular transport
