# Supplementary material for: BET family members Bdf1/2 modulate global transcription initiation and elongation in Saccharomyces cerevisiae
Source: eLife. 2021 Jun 17;10:e69619. doi: 10.7554/eLife.69619 (PMC8266393; doi:10.7554/eLife.69619)
Supplement: Supplementary file 3. — Related to Figures 2–5. [file elife-69619-supp3.xlsx]

## Sheet: index
4A	Spike-in normalized ChEC-seq signals. The mean value of 6 replicate DMSO treated samples from experiments involving Bdf1, Bdf2 or Bdf1/2 depletion is shown. Only the promoters bound by a given factor (see Materials and Methods) have an associated value.
4B	Spike-in normalized ChIP-seq signals for Bdf1, Bdf2 and H4K12ac. Bdf1 and Bdf2 signals were calculated for 1738 promoters bound by Bdf1 as identified by ChIP-seq (Methods). H4K12ac signal was calculated for 4883 promoters (Supplementary Table 2C) and normalized by H3 signal (Bruzzone et al., 2018).
4C	Log2 change in chromatin occupancy in ChEC-seq experiments after degradation of indicated factors. Only the promoters bound by a given factor (see Materials and Methods) have an associated value.
4D	Log2 change in Taf1 ChIP-seq signal at 2879 Taf1 bound promoters as defined by ChEC-seq.
4E	Log2 change in TFIIB ChIP-seq signal at all yeast promoters after depletion of Bdf1/2 or Taf13, as indicated.

## Sheet: 4A
gene_id	gene_name	class	TATA	Bdf1	Bdf2	Taf1	Taf11	Med8	Med17	Spt3
YAL001C	TFC3	TFIID		79360.3	48021.1	37454.9
YAL002W	VPS8	TFIID	TATA-less	65433.5	35431.3	44364.4	16357.8		3182.5	16025.9
YAL003W	EFB1	CR	TATA-less			66109.3	22948.5	79008.4	32530.2	64957.1
YAL005C	SSA1	CR	TATA-containing			47675.3		88506.9	63787	19363.5
YAL007C	ERP2	TFIID	TATA-less	66362.3	51163.7		6641
YAL008W	FUN14	TFIID	TATA-less	154392	91217.9	53771.5	5657.8
YAL009W	SPO7	TFIID		125692	64753.1	44766.5
YAL010C	MDM10	TFIID	TATA-less	125692	64753	44766.5
YAL011W	SWC3	TFIID	TATA-less	74480.2	56343.3					1210.6
YAL012W	CYS3	CR	TATA-less	52638.5	28810.5	36499.6	8134	4288.6	1693	6763
YAL013W	DEP1	TFIID	TATA-less	104881	59959.6	49129.9	16623.1			5038.2
YAL014C	SYN8	TFIID	TATA-less	104881	59959.6	49129.9	16623.1			5038.2
YAL015C	NTG1	TFIID
YAL016W	TPD3	TFIID		67097	39957.3		6624.9
YAL017W	PSK1	TFIID		133884	134971	48821.3	9717.3			1949.9
YAL018C				133884	134971	48829.5	9717.3			1949.9
YAL019W	FUN30	TFIID	TATA-less
YAL020C
YAL021C	CCR4	TFIID	TATA-less	104908	59536
YAL022C	FUN26	TFIID	TATA-less		19110.4
YAL023C	PMT2	TFIID	TATA-less		24779.8	15682.8
YAL024C	LTE1	TFIID	TATA-less
YAL025C	MAK16	TFIID	TATA-less
YAL026C	DRS2	TFIID	TATA-less	45703.1	26313.6
YAL027W	SAW1	TFIID	TATA-containing	65981.8	33174.9
YAL028W	FRT2	TFIID	TATA-less	109916	123153		8792.7
YAL029C	MYO4	TFIID	TATA-less	99036	73390	37577	8513.4
YAL030W	SNC1	TFIID		232327	175556	68099.8	19713.1			3569.5
YAL031C	GIP4	TFIID	TATA-less	232327	175556	68099.8	19713.1			3569.5
YAL032C	PRP45	TFIID	TATA-less	88262.3	61897.4
YAL033W	POP5	TFIID		96528.3	56776.6	25206
YAL034C	FUN19	TFIID		72474.5		24787	12474.3		4058	13707.3
YAL034W-A	MTW1	TFIID	TATA-less
YAL035W	FUN12	TFIID	TATA-less		22572.6
YAL036C	RBG1	TFIID	TATA-less		22530.4
YAL037C-A
YAL037W
YAL038W	CDC19	CR	TATA-less			25836.4	10182.1	77420	37910.3
YAL039C	CYC3	TFIID	TATA-less			16982.8	4896.1		5656.1	15217.2
YAL040C	CLN3	CR	TATA-less			32589	8367.1	30581.8	13838	14773.9
YAL041W	CDC24	TFIID	TATA-less	104274	75785.6	18621.9	7898.3
YAL042W	ERV46	TFIID	TATA-less	87974.1	65990.7	27573.9	12973.4			4426.5
YAL043C	PTA1	TFIID	TATA-less	87974.1	65990.7	27561.4	12973.4			4426.5
YAL044C	GCV3	TFIID	TATA-containing	137493	64200.9	31294.7	5626.2		1239.2	1585.6
YAL044W-A	YAL044W-A	TFIID		142586	82859.4	48012.3
YAL046C	AIM1	TFIID	TATA-containing	161389	95515.5	56030.6
YAL047C	SPC72	TFIID	TATA-containing	72633.2		21963.5
YAL048C	GEM1	TFIID		48552.4	30273.4
YAL049C	AIM2	TFIID	TATA-less	39433.6	23072.1
YAL051W	OAF1	TFIID	TATA-less	42429.8	26101.5	21451				2003.3
YAL053W	FLC2	TFIID	TATA-less	59011	39309.6	52096.6	7222.4	7668.6	5914.5	5710.5
YAL054C					21028.6	15462.9	5996.4	7797.2	7509.4	10329
YAL055W				48481.2	31596.3
YAL056W	GPB2	TFIID	TATA-less	47549.3	32672.2
YAL058W	CNE1	TFIID	TATA-less
YAL059W	ECM1	TFIID
YAL060W	BDH1	CR	TATA-containing	94858	47989.9	33896.7	6371.2		3096.4	6877.9
YAL061W							12516.7	16188.4	17385.8	9890.4
YAL062W				52001.3	38765.3	19383.6		3074.8
YAL063C
YAL063C-A
YAL064C-A
YAL064W
YAL064W-B
YAL065C
YAL067C
YAL067W-A
YAL068C
YAR002C-A	ERP1	TFIID	TATA-less	77904.5	59185.1	27401.1	5946.3
YAR002W	NUP60	TFIID	TATA-less	60363.4	41827.8	22766
YAR003W	SWD1	TFIID	TATA-containing	77904.5	59185.1	27401.1	5948.8
YAR007C	RFA1	TFIID	TATA-less	41616.6	23969.5
YAR008W	SEN34	TFIID		41616.6	24091.2
YAR009C
YAR010C								48078.9	4809	10130.1
YAR014C	BUD14	TFIID	TATA-less	41280.1	26268.8
YAR015W	ADE1	TFIID	TATA-containing	41280.1	26334.4
YAR018C	KIN3	TFIID	TATA-less
YAR019C	CDC15	TFIID	TATA-less	86589.6	50389
YAR020C
YAR023C				125555	80313
YAR027W	UIP3	TFIID		148748	70165.1	52446.2	11269	6187.5	3732.3	10825.6
YAR028W	YAR028W	TFIID	TATA-less
YAR029W
YAR031W
YAR033W				49827.5
YAR035C-A				34607.7	29294.4	21750.1
YAR035W
YAR042W	SWH1	TFIID	TATA-less	34607.7	29294.4	21750.1
YAR050W
YAR064W
YAR066W
YAR068W
YAR071W										1632.9
YBL001C	ECM15	TFIID		74555.4	48109.2		9416.1			4671
YBL002W	HTB2	CR	TATA-containing		50180.1			109546	56355.5	14947.4
YBL003C	HTA2	CR	TATA-containing	117925	85669	187011		84530.2	38259.3	12859.4
YBL004W	UTP20	TFIID	TATA-less	88229.1	52434.9	29502.6	10248.6	6890.5	2671.3	4953.7
YBL005W	PDR3	TFIID	TATA-less	68255.1	40555.5	19267.9	5116.2			6546.3
YBL005W-A				24936		8891.5		14170.3	2793.5	4352.7
YBL005W-B				24936		8891.5		14170.3	2793.5	4352.7
YBL006C	LDB7	TFIID	TATA-less	68255.1	40555.5		5116.2			6546.3
YBL007C	SLA1	TFIID	TATA-less	116787	91462.5	43685	10272.7		2516.4	10985.3
YBL008W	HIR1	TFIID	TATA-less
YBL008W-A
YBL009W	ALK2	TFIID	TATA-less
YBL010C	YBL010C	TFIID	TATA-less
YBL011W	SCT1	TFIID	TATA-less	41597.9	26689.6	30523	11060.8	5571.1	3542.1	15196.7
YBL013W	FMT1	TFIID	TATA-less	59372.7	39397.1	29469.6	11384.4	4191.8	3482.3	15854.5
YBL014C	RRN6	TFIID	TATA-less	59372.7	39397.1	29469.6	11384.4	4280.6	3482.3	15854.5
YBL015W	ACH1	TFIID	TATA-containing		29380.1				3984.5
YBL016W	FUS3	TFIID	TATA-containing						6354.5
YBL017C	PEP1	TFIID	TATA-less	120322	63101.6	64037.4	18371.8	7444.7	5857.2	22882
YBL018C	POP8	TFIID	TATA-less	49687.7	29248.4	15359.8	3879.6
YBL019W	APN2	TFIID		99457.4	49897.3	23357.5
YBL020W	RFT1	TFIID	TATA-less	70315.6	34392.8	22324.3				4295.5
YBL021C	HAP3	TFIID	TATA-less	70315.6	34392.8	22324.3				4295.5
YBL022C	PIM1	TFIID		139486	87296.1	25818.8	5499			2512.5
YBL023C	MCM2	TFIID
YBL024W	NCL1	TFIID	TATA-less	44027.3	21340.9	17055.1
YBL025W	RRN10	TFIID	TATA-less	65196	32537.5	17715.8
YBL026W	LSM2	TFIID	TATA-less	62269.4	36068.8	21431.5
YBL027W	RPL19B	TFIID	TATA-less			29155.1	17388	5323.2	5248.8	17255.6
YBL028C	YBL028C	TFIID	TATA-less					4645	3629.3
YBL029C-A	YBL029C-A	TFIID	TATA-containing					6791	4187.4	7245.3
YBL029W
YBL030C	PET9	CR	TATA-containing			19403.2	8741	5385.1	3875	4554.9
YBL031W	SHE1	TFIID	TATA-less	48095	29329.5
YBL032W	HEK2	TFIID	TATA-less	66710.3	38154.9		7831.4		2507	6520.8
YBL033C	RIB1	CR	TATA-containing	66710.3			8206.8		2507	7746.9
YBL034C	STU1	TFIID	TATA-less	61745.4	40568.7	24186.1
YBL035C	POL12	TFIID	TATA-containing
YBL036C	YBL036C	TFIID	TATA-less	82179.6	55486.8		8832.2			2041.2
YBL037W	APL3	TFIID	TATA-less	73961.8	39908.3		4107.5			1815.8
YBL038W	MRPL16	TFIID	TATA-less	67997.8	53968	19417.2	4881.6		1082.2
YBL039C	URA7	TFIID	TATA-less						1084.2
YBL039W-B	YBL039W-B	TFIID	TATA-less	25219			5081.7			846.7
YBL040C	ERD2	TFIID	TATA-less	73738.2	54058.9	25108.7	8693.1			4357.8
YBL041W	PRE7	TFIID	TATA-less	46286.6	40283.9	23568.1	11393.6	7574.7	5875.6	12151
YBL042C	FUI1	TFIID	TATA-less							3097.7
YBL043W										2880.6
YBL044W				55058.9	36460.8	56279.6	10350.2	8478	11179.3	14742.8
YBL045C	COR1	TFIID	TATA-less	55027.6	36460.8	56279.6	10350.2	8478	11179.3	14742.8
YBL046W	PSY4	TFIID	TATA-less	113006	87359.8	66368.7	23062			8121.4
YBL047C	EDE1	TFIID	TATA-less	113006	87359.8	66368.7	23062			8121.4
YBL049W
YBL050W	SEC17	TFIID	TATA-less	174564	161395	62831.3	22128.2			6761
YBL051C	PIN4	TFIID	TATA-less	174564	161395	62831.3	22128.2			6761
YBL052C	SAS3	TFIID		44689	24759.7
YBL054W	TOD6	TFIID	TATA-less					5160.7	3902.8
YBL055C	YBL055C	TFIID	TATA-less				8318	5018.9	3902.8	10690.6
YBL056W	PTC3	TFIID	TATA-less	152886	110571	46099.3	11979.7			3181.4
YBL057C	PTH2	TFIID	TATA-less	152886	110571	46099.3	11979.7			3181.4
YBL058W	SHP1	TFIID	TATA-containing	130176	103042	45917.5	16948			6451.6
YBL059C-A	CMC2	TFIID		130609	65988.1	41912
YBL059W	YBL059W	TFIID	TATA-less	130609	65988.1	41912
YBL060W	YEL1	TFIID		72379.9			12687.7
YBL061C	SKT5	TFIID	TATA-less	72379.9			12807
YBL063W	KIP1	TFIID	TATA-less	54928.1	31563.9
YBL064C	PRX1	CR	TATA-containing		43910.2	19266.1	5173.2			2728.6
YBL066C	SEF1	TFIID
YBL067C	UBP13	TFIID	TATA-less	64448	34779.7	28650.8				6989
YBL068W	PRS4	TFIID	TATA-less
YBL069W	AST1	TFIID	TATA-containing
YBL071C-B							11212.2		2315.7	6494.3
YBL071W-A							2245.5		368.2
YBL072C	RPS8A	TFIID	TATA-less
YBL074C	AAR2	TFIID	TATA-less	61203.3	34197.5		18517.6		2959.6	4042.7
YBL075C	SSA3	TFIID
YBL076C	ILS1	TFIID	TATA-less	57309.2	36182.9	18104.8
YBL078C	ATG8	TFIID	TATA-less	61363.9	56908.3	19199.9				2011.7
YBL079W	NUP170	TFIID	TATA-less			33750.6	13051.3
YBL080C	PET112	TFIID	TATA-less	133978	113454	31702.3	12682.4
YBL081W	YBL081W	TFIID	TATA-less
YBL082C	ALG3	TFIID	TATA-less
YBL084C	CDC27	TFIID	TATA-less	48955.7	32372.8
YBL085W	BOI1	TFIID	TATA-less	66267.7	38125.8	52211.1	8286		1907.1	12018.4
YBL086C	YBL086C	TFIID		43358.2	30147.4	21165.7				2130.5
YBL087C	RPL23A	TFIID	TATA-less			48758.1	9910.4		2442.6	4046.6
YBL088C	TEL1	TFIID	TATA-containing	54880.4	30216.5	19666.4
YBL089W	AVT5	TFIID		161582	93811.5	59204.9	7340.4
YBL090W	MRP21	TFIID	TATA-less	112745	63786.5	32913.1	4851.1
YBL091C	MAP2	TFIID		112745	63786.5	32913.1	4862.3
YBL091C-A	SCS22	TFIID	TATA-containing	191663	102332	39924.6
YBL092W	RPL32	TFIID	TATA-less			39895.8	18743.4	5739.8	3409.5	14076.3
YBL093C	ROX3	TFIID	TATA-less	78784.5	52656.2	49471.9			2155.7	10184.2
YBL095W	YBL095W	TFIID	TATA-containing	35730						1617.1
YBL097W	BRN1	TFIID	TATA-less	65951.9	43609.2
YBL098W
YBL099W	ATP1	TFIID	TATA-less	81393.5	58204.7	122927	23201.4	5880.3	3972.2	12479.3
YBL100W-A								4712.4	2317.8	1860.8
YBL100W-B								4712.4	2317.8	1860.8
YBL100W-C				78399	45933.1	29612.6			2093.1	10049
YBL101C	ECM21	TFIID		78399			8363.9		1951.8	9065.1
YBL102W	SFT2	TFIID	TATA-less	153730	106000	43231.6	16231.4			6689.7
YBL103C	RTG3	TFIID	TATA-less	153730	106000	43231.6	16231.4			6689.7
YBL104C	SEA4	TFIID	TATA-less	62457.5	44278.1
YBL105C	PKC1	TFIID	TATA-less	131497	91268.9	39387
YBL106C	SRO77	CR
YBL107C	MIX23	TFIID	TATA-less	58925.9	35699.8	25546.9
YBL108C-A
YBL111C
YBL112C
YBL113C
YBR001C	NTH2	CR	TATA-containing	109260	51636.9	93351.6	31040.3		3168.5	9665.4
YBR002C	RER2	TFIID	TATA-less	172155	90257.3	69632.5	14350.8			6664.8
YBR003W	COQ1	TFIID	TATA-less	172155	90257.3	69632.5	14350.8			6664.8
YBR004C	GPI18	TFIID					9453.7	8591.4	5979	8407.7
YBR005W	RCR1	TFIID	TATA-less				9453.7	8700.8	5979	8407.7
YBR006W	UGA2	TFIID		56635.7	27478.3					2890.1
YBR007C	DSF2	CR	TATA-less				8596	6642.8	1839.8	4185.3
YBR008C	FLR1	CR	TATA-less	43865.9						5356.5
YBR009C	HHF1	CR	TATA-containing	63749.2		45065	21143.8	50800	18706.2	14366.4
YBR010W	HHT1	CR	TATA-containing					47746.7	13916.7	16135.2
YBR011C	IPP1	TFIID	TATA-less	69307.2	44942.4	60874.7	6707.1			4906.9
YBR012W-A									1277.3	916.8
YBR012W-B									1277.3	916.8
YBR013C				117291	83572.8	28536
YBR014C	GRX7	TFIID	TATA-less
YBR015C	MNN2	TFIID	TATA-less	73847.7	40465.6	25794.6				3113.6
YBR016W	YBR016W	TFIID	TATA-containing				8941.1		2031.4	4255.2
YBR017C	KAP104	TFIID	TATA-less	46846.4	33742.8	21513.2
YBR018C
YBR019C
YBR020W
YBR021W									1043.9	2443.8
YBR022W	POA1	TFIID	TATA-less	61894.9	32387.2	15283.7
YBR023C	CHS3	TFIID	TATA-less	41211.7
YBR024W	SCO2	TFIID	TATA-less	54392.1	29192.8
YBR025C	OLA1	TFIID	TATA-less			31091.8		5420.9	2111.1	5062.3
YBR026C	ETR1	TFIID	TATA-less	41626.5	20550.3
YBR028C	YPK3	TFIID	TATA-less	39431.2	24548.5
YBR029C	CDS1	TFIID	TATA-less	43694.5	28123.4
YBR030W	RKM3	TFIID	TATA-less	43694.5	28123.4
YBR031W	RPL4A	TFIID	TATA-containing	65374.8	48749.1
YBR033W				50362	22177		6411.8		1348.9	4580.2
YBR034C	HMT1	TFIID	TATA-containing	61158.1		21118.7	6527.3			4091.8
YBR035C	PDX3	TFIID	TATA-less	112397	64315					2419
YBR036C	CSG2	TFIID	TATA-less	214478	113667	77958.9	32328.2		5092.4	17296
YBR037C	SCO1	TFIID	TATA-less	137540	111231	46869.6	6019.5		2067.6	3114
YBR038W	CHS2	TFIID	TATA-less						2067.6
YBR039W	ATP3	TFIID	TATA-less	64909.1	42379.5	29927.1	6194.9
YBR040W
YBR041W	FAT1	TFIID		89772.5	45435.5	24286.9
YBR042C	CST26	TFIID	TATA-less	72458.1	35666.4
YBR043C	QDR3	TFIID	TATA-less	50779.6	26816.8		5195.2		1671.1	3329.2
YBR044C	TCM62	TFIID		93477.5	41959.2	30486.4	7163			2237.7
YBR045C
YBR046C	ZTA1	CR	TATA-less	60990	30254.4	23990.5	5778.4			3530.2
YBR047W	FMP23	TFIID		60990	30254.4	23998.9	5777.1			3530.2
YBR048W	RPS11B	CR	TATA-less			33275.6	10482			4384.1
YBR049C	REB1	TFIID	TATA-less	150058	60135.2	51365.3	11629.5	7696	8092.7	8524.5
YBR050C				82337		38748.1	13371.5	5760.4	7362.7	16203.8
YBR052C	RFS1	TFIID	TATA-less	104204	47643.4	61093.2	15581.8		5735.8	15029.4
YBR053C	YBR053C	TFIID	TATA-less	134192	81579.6	58031.5	15675.3		3174.9	8750.2
YBR054W	YRO2	CR	TATA-containing					9874.8	6614.1
YBR055C	PRP6	TFIID	TATA-less					3790.9	3402.4
YBR056W	YBR056W	TFIID	TATA-less	86662	46717.4	37389	7587	3793.5	3402.4	8185.8
YBR056W-A	YBR056W-A	CR	TATA-less			25872	3142.9	4143.6	1234.8	799.3
YBR057C	MUM2	TFIID	TATA-less	43620.2	24463.9
YBR058C	UBP14	TFIID		100954	60521.4
YBR058C-A	TSC3	TFIID	TATA-less	107050	62781.1	33390.8	6600.9		1934.4	5138.8
YBR059C	AKL1	TFIID	TATA-less	112392	93635.4	56628.9	12277.5	4804.1	2320.2	5591.1
YBR060C	ORC2	TFIID	TATA-less	60838.5	36041.8	30528.9	11604.8	3254.3		5297.5
YBR061C	TRM7	TFIID	TATA-less	54413.6
YBR062C	YBR062C	TFIID	TATA-less	64801.4	33145.9
YBR063C	YBR063C	TFIID
YBR065C	ECM2	TFIID	TATA-less							3769.5
YBR066C	NRG2	CR	TATA-containing			17985.2		27950.2	11920.8
YBR067C	TIP1	TFIID	TATA-containing
YBR068C	BAP2	CR	TATA-containing				10772.7	128038	54947.3	26704.3
YBR069C	TAT1	CR	TATA-containing			34816		27428	10071.4	16554.9
YBR070C	ALG14	TFIID	TATA-less	55748.3		29637.2				7936.6
YBR071W	YBR071W	CR	TATA-less	55383.6		29555.5	7559.3			6301.5
YBR072C-A				62050.8	30353.8	22720.3
YBR072W				61828.1		28219.3			14441.3	8691
YBR073W	RDH54	TFIID	TATA-containing	62050.8	31022	22774.6
YBR074W	PFF1	TFIID	TATA-less
YBR076W
YBR077C	SLM4	TFIID	TATA-less	64322.3	51290.4	66981.8	11315.6	16981.5	7587.2	7005.8
YBR078W	ECM33	CR	TATA-less			30801.7	13245.1	22960.3	11647.7	11621.5
YBR079C	RPG1	TFIID	TATA-less
YBR080C	SEC18	TFIID	TATA-less	65288.3	47444.5	22292.1	8430.2			4568.9
YBR081C				56221	42515
YBR082C	UBC4	TFIID	TATA-less	67468	37327.1	122074	34686.1	28685.7	12176.6	25172.8
YBR083W	TEC1	CR	TATA-containing						2196.9	6473.1
YBR084C-A	RPL19A	TFIID	TATA-less			26405.7	12511.8		4813.9	17106.1
YBR084W	MIS1	TFIID	TATA-less
YBR085C-A	YBR085C-A	CR	TATA-containing			24276.8	10890.7		15277.9
YBR085W	AAC3	TFIID	TATA-less						4810.2
YBR086C	IST2	TFIID	TATA-less	75800.1	48370	48948.7	16716.6			8180.4
YBR087W	RFC5	TFIID	TATA-less	75633.3			16121.1
YBR088C	POL30	CR	TATA-containing
YBR089C-A	NHP6B	TFIID				58602.9		10429.4	3744.9	2797.3
YBR090C
YBR091C	TIM12	TFIID	TATA-less
YBR092C	PHO3	CR	TATA-containing						1471
YBR093C	PHO5	TFIID	TATA-containing						2695.7
YBR094W	PBY1	TFIID		70405.9	38665					2840.6
YBR095C	RXT2	TFIID	TATA-less	121707	65274	56006.4	18395.2		1753	5428.3
YBR096W	YBR096W	TFIID	TATA-less	121707	65274	56006.4	18395.2		1752.7	5428.3
YBR097W	VPS15	TFIID	TATA-less	66094.1	35736.8
YBR098W	MMS4	TFIID		38750	23079.3
YBR101C	FES1	TFIID	TATA-less	64133.3	40445	54591.1	15544.4	19678.6	8077.1	18667.1
YBR102C	EXO84	TFIID	TATA-less	69555.9	41535.7	23120.7
YBR103W	SIF2	TFIID	TATA-less	69555.9	41535.7	23130.5
YBR104W	YMC2	TFIID	TATA-less
YBR105C	VID24	TFIID	TATA-containing			36555.9		16859.8	7344.4	9498.6
YBR106W	PHO88	TFIID	TATA-containing	39607.2	22143	34889.2	15291.3	17026.3	9200.7	17040.5
YBR107C	IML3	TFIID	TATA-less	74770.1	44650.3	26603.3	4691.8			2543.3
YBR108W	AIM3	TFIID	TATA-less	74770.1	44650.3	26603.3	4734.3			2543.3
YBR109C	CMD1	TFIID	TATA-less	174518		48066.3	26261.8			3697.6
YBR110W	ALG1	TFIID	TATA-less	194590	135265	45014.1	26246.2			3697.6
YBR111C	YSA1	TFIID	TATA-containing	116901	64425.9	43813.4	9333.5		2024.2	5963.1
YBR111W-A	SUS1	TFIID	TATA-less	37672.1	24352.1	15712.3	3028.4		431.5	449.6
YBR112C	CYC8	TFIID	TATA-less	28260.2		38747.9	9430.4	7216.7	5403.9	16971.3
YBR114W	RAD16	TFIID	TATA-containing	76576.7	41202.4	77289.5	7411.4	3775.1	1481.5	4158.1
YBR115C
YBR117C										3254.3
YBR118W	TEF2	CR	TATA-containing			88236.9	37009.3	44935.4	26648.3	22563.7
YBR119W	MUD1	TFIID	TATA-less	58643.5	30041.4	30031.6	6145.1			3512.8
YBR120C	CBP6	TFIID	TATA-less	78875.3	40703.2	24704.3				3650.3
YBR121C	GRS1	TFIID	TATA-less	105003	65058.9	30584	8793.2			2641.4
YBR122C	MRPL36	TFIID	TATA-less	56487.3	34622		8753.4
YBR123C	TFC1	TFIID	TATA-less	60076.5	38574.7
YBR125C	PTC4	TFIID	TATA-containing	119838	74763.7	67837.3	10930.7			7923
YBR126C	TPS1	CR	TATA-containing	78470.3		70445	31975.2	43406.3	35587.4	24530.5
YBR126W-A				55624.8		52819.5	12686.8	14516.3	4409.3	26825.9
YBR127C	VMA2	TFIID	TATA-less	101807	48656.4	41169.8	14578.3		2275.1	9517.3
YBR128C	ATG14	TFIID		68080.1	41424
YBR129C	OPY1	TFIID		121707	85991.4	29995.9			2180.1	4508.8
YBR130C	SHE3	TFIID		144689	82818	40567.4	15348.4			8265.9
YBR131W	CCZ1	TFIID	TATA-less	144689	82818	40568.1	15396.3			8265.9
YBR132C	AGP2	CR	TATA-containing	52641.4	24329.6	26115.8	8565.8		2544.2	11119.5
YBR133C	HSL7	TFIID	TATA-less	126739	92729.7	86450.6	11030.7		2047.6	2778.4
YBR135W	CKS1	TFIID	TATA-containing		59089.9		10545.1		2035.8	2778.4
YBR136W	MEC1	TFIID	TATA-less	39517	21535.8
YBR137W	YBR137W	TFIID	TATA-less	153960	84747.1	35330.4
YBR138C	YBR138C	TFIID	TATA-less	85339.2	44037	24790.5	7740.8			7234.6
YBR139W	YBR139W	CR	TATA-containing	85339.2	44037	24790.5	7741.3			7234.6
YBR140C	IRA1	TFIID		110318	95825.9	40018.6	10616.8			3076.8
YBR141C	BMT2	TFIID
YBR142W	MAK5	TFIID	TATA-less
YBR143C	SUP45	TFIID	TATA-less	71099.4	44699.5	31435.3	9062.8			3178.3
YBR145W	ADH5	CR	TATA-containing				9018.9	9785.1	4003.1	8063.4
YBR146W	MRPS9	TFIID	TATA-less	253317	232623	96297.7	23747.2			4902.2
YBR147W										2659.7
YBR148W
YBR149W	ARA1	CR	TATA-containing	89844.1	52935.4	81119.2	23488.7	6530.5	6035.4	16471.1
YBR150C	TBS1	TFIID	TATA-less				6104.5	3413.6	1421.4
YBR151W	APD1	TFIID	TATA-less	68117.2	46481.8	27467.8	6627.6	3484.2	1938.5	4268.8
YBR152W	SPP381	TFIID	TATA-less	56632.3	27783.1	17810.6
YBR153W	RIB7	TFIID	TATA-less	34335	16887.8
YBR154C	RPB5	TFIID	TATA-less
YBR155W	CNS1	TFIID
YBR156C	SLI15	TFIID	TATA-less
YBR157C	ICS2	CR	TATA-containing					15129.4	6679.9	9831.5
YBR158W	AMN1	CR	TATA-containing			18533.9		23663.5	8153
YBR159W	IFA38	TFIID	TATA-less	52887.3	27985.2	17896.7
YBR160W	CDC28	TFIID	TATA-less
YBR161W	CSH1	TFIID	TATA-less	38259.5			6574.6	4159.6	2870.5	9777.5
YBR162C	TOS1	CR	TATA-less			39057.6	14919.1	16102.5	7363.3	12705.7
YBR162W-A	YSY6	TFIID	TATA-less				14153.5	6535.4	2259.8	3432.8
YBR163W	EXO5	TFIID	TATA-less	132274	96825.9	58632.4	14852.6		2759.8	5052.7
YBR164C	ARL1	TFIID	TATA-containing	136513	70233.4	53844	41214			5964.6
YBR165W	UBS1	TFIID	TATA-less	136513	70233.4	53844	41214			5964.6
YBR166C	TYR1	TFIID		81228.8	42319.8	21523.7
YBR167C	POP7	TFIID		96967.7	50184.7	35778.4
YBR168W	PEX32	TFIID	TATA-less	96967.7	50184.7	35765.3
YBR169C	SSE2	TFIID		105173	68879.4	63000.7	22127.3	8216.1	7726.5	10495
YBR170C	NPL4	TFIID		77421.5	45179.8	30990.2	7291.7			3632.7
YBR171W	SEC66	TFIID		77421.5	45179.8	30990.2	7291.7			3632.7
YBR172C	SMY2	TFIID	TATA-less	78664.9	41243.5
YBR173C	UMP1	TFIID	TATA-less	98916.7	49638.3					2728.5
YBR175W	SWD3	TFIID	TATA-less	98916.7	49638.3					2728.5
YBR176W	ECM31	TFIID	TATA-less	70251.2	38537.8
YBR177C	EHT1	CR								4389.4
YBR179C	FZO1	TFIID	TATA-less	42545.6			6633.3		1867.3	8098.4
YBR180W									1867.3
YBR181C	RPS6B	TFIID	TATA-less			20929.4	10099.8		3090.1	16671.3
YBR182C
YBR182C-A					28964.4	31975.1	15528.8	9042.8	6972.8	25235.1
YBR183W					30366.6	44612.1	15528.8	9042.8	6632.3	25235.1
YBR184W
YBR185C	MBA1	TFIID	TATA-less	62917.4	49751.2	19566.7
YBR186W
YBR187W	GDT1	TFIID	TATA-less	36921.6		22082.9	6273.3			6882.9
YBR188C	NTC20	TFIID		45426.6	26921.7		7263.5		1384.5
YBR189W	RPS9B	TFIID	TATA-less	45426.6	26546.2	21529.8	7263.5		1343.8
YBR191W	RPL21A	TFIID	TATA-less			19529.3	8393.5		2855.8	8171
YBR192W	RIM2	TFIID	TATA-less
YBR193C	MED8	TFIID	TATA-less	94901.9	49303.3	35804.2	5821.9
YBR194W	AIM4	TFIID		94901.9	49303.3	35804.2	5822.5
YBR195C	MSI1	TFIID	TATA-less
YBR196C	PGI1	CR	TATA-containing			50202.9	16604.6	49268.5	26928.5	31274.2
YBR196C-A						37066	13740	37084.4	17928.6	15442.1
YBR196C-B								21382.3	10530.7
YBR197C	YBR197C	TFIID	TATA-less
YBR198C	TAF5	TFIID	TATA-less	94681.8	74422.8	36376.9	15853.6			6573.4
YBR199W	KTR4	TFIID	TATA-less	94681.8	74422.8	36376.9	15853.6			6573.5
YBR200W	BEM1	TFIID	TATA-less	30716.1	18119.2
YBR200W-A
YBR201C-A	YBR201C-A	TFIID	TATA-containing					6527.7	3006.2
YBR201W	DER1	TFIID	TATA-less	36627.3
YBR202W	MCM7	TFIID	TATA-less					8953.5	3799.5
YBR203W								3755.5	2575.3	5919.1
YBR204C	LDH1	TFIID		63348.9	42278.1	16789.5
YBR205W	KTR3	TFIID	TATA-less	63348.9	42278.1	16789.5
YBR207W	FTH1	TFIID	TATA-less	110942	63374.5	36166.3	5445.6			1972.7
YBR208C	DUR1,2	TFIID	TATA-less			50016.7			2368.8
YBR210W	ERV15	TFIID	TATA-less	156980	94666.7	41118.9	9520
YBR211C	AME1	TFIID	TATA-less	141778	118415	67374.9	19013.3			9841.9
YBR212W	NGR1	TFIID	TATA-less	141778	118415	67374.9	19013.3			9841.9
YBR213W	MET8	TFIID		44350.3
YBR214W	SDS24	TFIID	TATA-less	75641.5	44473.4	33191.4	14268.7		5143.9	19154.4
YBR215W	HPC2	TFIID	TATA-less	66673.7	33761.6	16204.6
YBR216C	YBP1	TFIID		97569.6	53637.4	25032.4
YBR217W	ATG12	TFIID	TATA-less	97569.6	53637.4	25049.2
YBR218C	PYC2	CR	TATA-less	85647	53854	70550.6		9068.6	4156.1	11716.5
YBR219C
YBR220C	YBR220C	TFIID	TATA-less
YBR221C	PDB1	TFIID	TATA-less	90307.2	49911.9	33275.5	8004.1			4205.6
YBR221W-A				92024.5	53143.4	34543.3	4679.2			447.8
YBR222C	PCS60	TFIID	TATA-containing	68842.8	28914.4	22271.9	8312.2			1893
YBR223C	TDP1	TFIID		138185	76369.8	35111.7	6364.3			1917.6
YBR225W	YBR225W	TFIID		138185	76369.8	35111.7	6364.3			1932.9
YBR227C	MCX1	TFIID		66358.4	42044.2	17811.5
YBR228W	SLX1	TFIID	TATA-less	66358.4	42044.2	17811.5
YBR229C	ROT2	TFIID	TATA-less	119147	60607.7	28706	7684.7			3408.3
YBR230C	OM14	CR	TATA-containing			26678.7	7512.6	3967.4	2688	9941.1
YBR230W-A				41618.2	20860.5	20772.5	6443	3806.3	1833.6	6376.4
YBR231C	SWC5	TFIID	TATA-less		27464.8					1700
YBR233W	PBP2	TFIID			27503					1713.5
YBR233W-A	DAD3	TFIID	TATA-less	55814.5	31707.1
YBR234C	ARC40	TFIID	TATA-less	115195	79681.1	26446.7	8570			1869.5
YBR235W	VHC1	TFIID		115195	79681.1	26515	8570			1886.1
YBR236C	ABD1	TFIID	TATA-less	69076.1	33954
YBR237W	PRP5	TFIID	TATA-less	69114.8	33718.2
YBR238C	YBR238C	TFIID	TATA-less			23057.8		3487.6	3113
YBR239C	ERT1	TFIID		57531.3	34303.6
YBR240C				44457.6	23083.1	10832.1
YBR241C				50071			5541.1
YBR242W	YBR242W	TFIID	TATA-containing	50092			5786.4
YBR243C	ALG7	CR	TATA-less	80167.8	40544.4
YBR244W	GPX2	CR	TATA-containing		31175.8
YBR245C	ISW1	TFIID		61132.9	29654.7
YBR246W	RRT2	TFIID	TATA-less	61259.3	29645.1
YBR247C	ENP1	TFIID	TATA-less
YBR248C	HIS7	TFIID	TATA-less
YBR249C	ARO4	CR	TATA-less			19435.3	6472.5	4547.4	1577.6	3642.5
YBR250W									1285.4
YBR251W	MRPS5	TFIID	TATA-less	124352	72231.3	36863.1	6424.1
YBR252W	DUT1	TFIID	TATA-containing	73158.1
YBR253W	SRB6	TFIID		119375	55783.3	27154.9	8644.4
YBR254C	TRS20	TFIID		68136.2
YBR255C-A	YBR255C-A	TFIID	TATA-less	93775.9	50143.3	29453.6	7419.4
YBR255W	MTC4	TFIID		68289.5
YBR256C	RIB5	CR	TATA-containing	90725.6	62184.2	34033.3
YBR257W	POP4	TFIID	TATA-less	48097.7	27609		5644.7
YBR258C	SHG1	TFIID	TATA-less	73971.4	34749.2
YBR259W	YBR259W	TFIID		73810.9	34686.2
YBR260C	RGD1	TFIID		86326.3	45551.6	20360.7
YBR261C	TAE1	TFIID	TATA-less	66534.9	34934.7
YBR262C	MIC12	TFIID	TATA-less	74928.1	35182.5	20324.8	4196.7
YBR263W	SHM1	TFIID		74928.1	35182.5	20323.2	4201.5
YBR264C	YPT10	TFIID	TATA-less	82056.8	41164.7	20836.3
YBR265W	TSC10	TFIID	TATA-less	82056.8	41164.7	20838.7
YBR267W	REI1	TFIID	TATA-less
YBR268W	MRPL37	TFIID	TATA-less	91924	47524.1					2181.1
YBR269C	SDH8	TFIID	TATA-less	118502	62141.7	47564.6	10120.2			5161.3
YBR270C				119562	62531.9		7096.5
YBR271W	EFM2	TFIID	TATA-less	119562	62531.9
YBR272C	HSM3	TFIID	TATA-containing	83460.7	35981.1
YBR273C	UBX7	TFIID		102004	61199.1	22109.7	3984.5
YBR274W	CHK1	TFIID		102004	61199.1	22144.6	3964.2
YBR275C	RIF1	TFIID	TATA-less
YBR276C	PPS1	TFIID		77642.9	45500.4	22125.4
YBR278W	DPB3	TFIID		77642.9	45500.4	22027.7
YBR279W	PAF1	TFIID	TATA-less	103307	88516.7	49174.4	9804.9
YBR280C	SAF1	TFIID		53169.9
YBR281C	DUG2	TFIID	TATA-less							2359.8
YBR282W	MRPL27	TFIID	TATA-less	125990	97355.2	32039.5
YBR283C	SSH1	TFIID	TATA-less	86908.2	63372.5	53984.2	9146.4		1968.9	6411.7
YBR284W									1785.8	4192.9
YBR285W				46845.7	32610.8	19927.2	4922			1995.8
YBR286W	APE3	CR	TATA-containing	72945.6	42036.2	30930.6			1550.1	3575.9
YBR287W	YBR287W	TFIID	TATA-containing	60042.4	28440.2	49649	21207.8	7729.3	4771.9	18003
YBR288C	APM3	TFIID		28333.8	15519.5
YBR289W	SNF5	TFIID	TATA-less	28231.1	15505.5
YBR290W	BSD2	TFIID	TATA-containing	73741	54598.1	30580.4	6131.2
YBR291C				96729.1	47843	27434.5
YBR293W	VBA2	TFIID	TATA-less				12794.6			1668.4
YBR294W
YBR295W	PCA1	TFIID	TATA-containing	52050.8	30101.7				1311.1	1318.7
YBR296C	PHO89	CR	TATA-containing					22233.3	65147.1	11631
YBR296C-A				40405.5	28641.6	32260.9	10156.3			15087.9
YBR297W				40539.4	28799.2	31946.4	10156.3			15087.9
YBR298C	MAL31	CR	TATA-containing						3428.4
YBR298C-A
YBR299W				44858.1	29350.7	27361.9	10286.2		3428.4	9153.9
YBR301W
YBR302C
YCL001W	RER1	TFIID	TATA-less	107810	51205	42170.6	6918.1			3588
YCL001W-A
YCL001W-B
YCL002C	YCL002C	TFIID		107810	51205	42107.6	6918.1			3588
YCL004W	PGS1	TFIID		90336.9	51615		4713.1
YCL005W	LDB16	TFIID	TATA-containing	116204	56895.3	72648	11422.2
YCL005W-A	VMA9	TFIID		112111	63274.1	46890.8	6430.2			943.3
YCL008C	STP22	TFIID	TATA-less	123546	71546.9	51534.1	8514.9			1798.5
YCL009C	ILV6	TFIID	TATA-less							4296.5
YCL010C	SGF29	TFIID	TATA-less	102608	63049.8	44160.7	7260.3			5425.6
YCL011C	GBP2	TFIID	TATA-less	69433.4	46634.3	26845	6196.2
YCL012C	YCL012C	TFIID		57765	29912.9
YCL014W	BUD3	TFIID	TATA-less	68818.2	36374
YCL016C	DCC1	TFIID	TATA-less	68818.2	36834.2
YCL017C	NFS1	TFIID	TATA-less	73073.1	49119.7
YCL018W
YCL019W								12179.8	6500.5	5101.5
YCL020W								12179.8	6500.5	5101.5
YCL021W-A	YCL021W-A	CR
YCL024W	KCC4	TFIID	TATA-less
YCL025C	AGP1	CR	TATA-containing			33137.8	8461.5	17098.1	11457.4	24243.2
YCL026C-A	FRM2	CR
YCL026C-B	HBN1	CR		57886.6	43557.2	16007.3				4171.5
YCL027W	FUS1	CR	TATA-less
YCL028W	RNQ1	TFIID		53102.7	28645.5
YCL029C	BIK1	TFIID	TATA-less	53102.7	28628.7
YCL030C	HIS4	CR	TATA-containing	55834.3	29901.7	26678.4	8972	27257.8	7599.6	14589.1
YCL031C	RRP7	TFIID	TATA-less	62429.6	40932.3		5991.2			3281.8
YCL032W	STE50	TFIID	TATA-less	62830.1
YCL033C				62830.1
YCL034W	LSB5	TFIID	TATA-containing	222438	140620	61682.7	38049.8	6274.4	3657.4	7565.2
YCL035C	GRX1	TFIID	TATA-containing	222438	140620	61682.7	36798.3	6311.2	3524	7618.6
YCL036W
YCL037C	SRO9	TFIID	TATA-less
YCL038C	ATG22	TFIID	TATA-less
YCL039W	GID7	TFIID	TATA-less	68958.1	53158.7	27261.2	6978.5		3110.7	6633.3
YCL040W	GLK1	CR	TATA-containing				11528.9	45764	20003.2	23722.2
YCL042W						26757	11796.3		15802.1	25883.9
YCL043C	PDI1	CR	TATA-containing			26757	11686.5	43394.9	15802.1	22279.6
YCL044C	MGR1	TFIID	TATA-less	160622	123664	54664.3	16601.1		3903.6	11234.8
YCL045C	EMC1	TFIID	TATA-containing	163473	94295.4	32723.7	10295.5			5473.4
YCL047C
YCL048W
YCL048W-A
YCL049C				140819	82916	47573.9	8564.7
YCL050C	APA1	TFIID	TATA-less	81172.5	48946.2	32896.8	8611.2	4635.8		4921.5
YCL051W	LRE1	TFIID	TATA-less	119117	68653.4	39025.5	5709.9
YCL052C	PBN1	TFIID		119117	68653.4	39025.5	5715.9
YCL054W	SPB1	TFIID	TATA-less
YCL054W-A
YCL055W	KAR4	CR	TATA-containing		30176
YCL056C	PEX34	TFIID	TATA-less	66384.4	38815.9
YCL057C-A	MIC10	TFIID	TATA-less	82874.7		48098.8	14776.4
YCL057W	PRD1	TFIID	TATA-less	86605	55762.5	36560.6	14926.6			2776.6
YCL058C						48098.8
YCL058W-A	ADF1	TFIID	TATA-less
YCL059C	KRR1	TFIID	TATA-less
YCL061C	MRC1	TFIID	TATA-less
YCL063W	VAC17	TFIID	TATA-less
YCL064C	CHA1	CR	TATA-containing
YCL066W				40273.5	27591.3	19203.9	5860.2			1686.1
YCL067C				40273.5	27591.3	19203.9	5888.5			1679.4
YCL068C
YCL069W
YCL073C
YCR002C	CDC10	TFIID	TATA-less	103264	64305.9	43317.3	15990.2			5861.6
YCR003W	MRPL32	TFIID	TATA-less	103264	64305.9	43308.3	15990.2			5861.6
YCR004C	YCP4	TFIID	TATA-containing	104526	63353.5	73809.7	18631.5	13892.4	8814.8	15910.5
YCR005C	CIT2	CR	TATA-containing					48009.7	30883.7	23519.1
YCR007C				97625
YCR008W	SAT4	TFIID	TATA-containing			51999.3	6565.9	11124.9	6816.7	11598.7
YCR009C	RVS161	TFIID	TATA-less	81832.1	38043.5	46217.3	15708.2	7010.7	4185.7	27482.5
YCR010C
YCR011C	ADP1	TFIID	TATA-less	74912	60226.3	84566.3	16613.5	171595	54937	19920.5
YCR012W	PGK1	CR	TATA-containing			50416	20240.2	228384	157132	65032.1
YCR014C	POL4	TFIID
YCR015C	YCR015C	TFIID	TATA-less	68070.7	41344.6			10745.1	3741.4
YCR016W	YCR016W	TFIID	TATA-less
YCR017C	CWH43	TFIID	TATA-less	106862	59465.8	56762.1	13379.4	8922.9		7755.2
YCR018C	SRD1	CR						5174.8		1967.5
YCR019W	MAK32	TFIID	TATA-less	119326	73233.1	42159.5
YCR020C
YCR020C-A	MAK31	TFIID		75924	42732.9	23805.1
YCR020W-B	HTL1	TFIID		24269.6	15507.3	11201.7
YCR021C	HSP30	CR	TATA-containing			28986.3		45091.2	37015.7
YCR023C	YCR023C	TFIID	TATA-less	56479.2	27781.8
YCR024C	SLM5	TFIID		44984.8	25774.5
YCR024C-A	PMP1	CR	TATA-containing			60640.1	16899.1	29164.4	11145	15705
YCR024C-B	YCR024C-B	CR						29164.4	11145
YCR026C	NPP1	TFIID	TATA-containing	46520.7	25175.7
YCR027C	RHB1	TFIID	TATA-less	87456.3	68014.4	45916.1	7059.9
YCR028C	FEN2	TFIID	TATA-containing	134892	93710.7	48907.7	10615.2			3371.6
YCR028C-A	RIM1	TFIID	TATA-less	87357.5	56777.2
YCR030C	SYP1	TFIID	TATA-less	150960	114448	103976	22947.7	6246.9	3303.5	5973.7
YCR031C	RPS14A	TFIID	TATA-containing			37894.4		4967	2308.7	6339
YCR032W	BPH1	TFIID		68650.7	47673.8		8706.5
YCR033W	SNT1	TFIID	TATA-less	95602.1	67051.4	39292.9	14460.1			7329.5
YCR034W	ELO2	TFIID	TATA-less
YCR035C	RRP43	TFIID	TATA-less	134660	109591	67847.2	11937.3			2710.4
YCR036W	RBK1	TFIID	TATA-less	134660	109591	67847.2	11937.3			2710.9
YCR037C	PHO87	TFIID	TATA-less	56052.6	33211.5	27683.2	12531.1	9848.1	7446	19242.3
YCR038C	BUD5	TFIID
YCR039C				42237.9	28588.5	20817.9	6180.9			1740.6
YCR040W				42237.9	28588.5	20817.9	6180.3			1746.4
YCR041W
YCR042C	TAF2	TFIID	TATA-less	94067.8	41331.5		6842.6
YCR043C	YCR043C	TFIID	TATA-less	49900.7	32796.2
YCR044C	PER1	TFIID	TATA-less	60722.8	34008
YCR045C
YCR046C				69530.6	36653.6	17711.8	5431
YCR047C	BUD23	TFIID	TATA-less				3987.2			2219.9
YCR048W	ARE1	TFIID	TATA-less				3991.4			2219.9
YCR050C				70675.6	30130.7					3106
YCR051W	YCR051W	TFIID	TATA-less	70737.6	29732.7					3106
YCR052W	RSC6	TFIID	TATA-less	55306.6	30236.7
YCR053W	THR4	TFIID	TATA-less	66155.3	45677.7	20889	4231.9			2909.7
YCR054C	CTR86	TFIID	TATA-less
YCR057C	PWP2	TFIID	TATA-less
YCR059C	YIH1	TFIID
YCR060W
YCR061W									2013.9	3762.2
YCR063W	BUD31	TFIID	TATA-less	37560.8	26011	18176.4
YCR065W	HCM1	CR	TATA-less						1778.6	2721.6
YCR066W	RAD18	TFIID	TATA-less
YCR067C	SED4	TFIID	TATA-less		62591.8
YCR068W	ATG15	TFIID	TATA-less	159043	90374.8	41678.1	15169.5			7245.8
YCR069W	CPR4	TFIID	TATA-less	63590	48197.6	15523.7	7160.8			3680.1
YCR071C	IMG2	TFIID	TATA-less	158746	122770	36049.2
YCR072C	RSA4	TFIID	TATA-less
YCR073C	SSK22	TFIID	TATA-less	108358
YCR073W-A	SOL2	TFIID	TATA-less	67530	50481.8
YCR075C	ERS1	TFIID	TATA-less	83668.2	46985.3
YCR075W-A	YCR075W-A	TFIID		48876.4	25461.9
YCR076C
YCR077C	PAT1	TFIID	TATA-less	130698	100182	28159.6	5853.2
YCR079W	PTC6	TFIID	TATA-less	130698	100182	28159.6	5853.2
YCR081W	SRB8	TFIID	TATA-containing	59487.6	28432.9
YCR082W	AHC2	TFIID	TATA-containing	119467	97297	26401.3	9337.9			3330.7
YCR083W	TRX3	TFIID	TATA-less	115748		26094.1
YCR084C	TUP1	TFIID	TATA-less	86767.7	77079.5	81402.8	7108.9
YCR086W	CSM1	TFIID	TATA-less		57379.5	27176.8
YCR087C-A	YCR087C-A	TFIID	TATA-less
YCR088W	ABP1	TFIID	TATA-less	70831.8	57567.3		4561			1478
YCR089W	FIG2	TFIID	TATA-less	47242.4
YCR090C	YCR090C	TFIID	TATA-less	39461.2	19266.8
YCR091W	KIN82	TFIID		62706.4	43358.9	17603.6	5057.3			4602.5
YCR092C	MSH3	TFIID	TATA-less	75517.4	57630.4		6181.5			2181.4
YCR093W	CDC39	TFIID	TATA-less	75517.4	56784.1	35929.6	6154.6			2181.4
YCR094W	CDC50	TFIID	TATA-less	69710.9	53735.6
YCR095C	OCA4	TFIID	TATA-less	57879.2	34563.9
YCR095W-A	YCR095W-A	TFIID	TATA-less	24519.1	17892.1
YCR096C
YCR097W
YCR098C				37594.9	24876.4				5865.4
YCR099C	YCR099C	TFIID
YCR100C	YCR100C	TFIID
YCR101C	YCR101C	TFIID
YCR102C	YCR102C	CR
YCR104W
YCR105W
YCR106W	RDS1	TFIID	TATA-less	45715.4	23247.8
YCR107W	AAD3	TFIID
YDL001W	RMD1	TFIID	TATA-less	86444.5	45196.7	42989.4	12654.9			13170.4
YDL002C	NHP10	TFIID	TATA-less	86444.5	45196.7	42989.4	12654.9			13170.4
YDL003W	MCD1	CR	TATA-containing
YDL004W	ATP16	TFIID	TATA-less	75811.2	53505.2	27445.9	8623.8		1662.6	5557.9
YDL005C	MED2	TFIID	TATA-less	78634.4	57669.6	40270.7	7493.1			4732.2
YDL006W	PTC1	TFIID	TATA-less	95072.2	63488.8	54879.4	5432.5			2549.8
YDL007C-A
YDL007W	RPT2	TFIID	TATA-less	75874	65264.4	53049	6623.5		3161.3	7768.2
YDL008W	APC11	TFIID	TATA-less	65754.5	32566.2
YDL009C				65754.5	32566.2
YDL010W	GRX6	TFIID	TATA-less	104330	50923.1	72468.1	26686.9	29422.5	13202.5	50604.3
YDL012C	YDL012C	TFIID	TATA-containing	75002.5	49954.7	30142.5			6700.2	14290.5
YDL013W	SLX5	TFIID	TATA-less	130035	75790.9
YDL014W	NOP1	TFIID		95760	67645.8	39283.3	9325			4296.2
YDL015C	TSC13	TFIID	TATA-less	95760	67645.8	39283.3	9334.3			4394.9
YDL017W	CDC7	TFIID	TATA-less	79367	50239.9	30758.6	6709.7
YDL018C	ERP3	TFIID	TATA-less
YDL019C	OSH2	TFIID	TATA-less	77294.5	41311.1	43847.7	14248.7	5621.5	4441.8	28801.2
YDL020C	RPN4	CR	TATA-containing			58652.1	10877	19474.3	11794.4	14316.2
YDL021W					66352.4	42079.4				7693.4
YDL022C-A				70715.2
YDL022W	GPD1	CR	TATA-containing				7166	26716.8	74331.5	18891.7
YDL024C				70715.2
YDL025C	RTK1	CR	TATA-less	110089	63208.9	41189.4	11534.5	5906.3	5099.8	9979.5
YDL027C	YDL027C	TFIID	TATA-less	89196.6	56676.3	41776.9	22760.5		2741.1	12853.9
YDL028C	MPS1	TFIID	TATA-less		42769
YDL029W	ARP2	CR	TATA-less	173616	117452	57068.8	20085.9			8633.1
YDL030W	PRP9	TFIID	TATA-less	37081.2
YDL031W	DBP10	TFIID	TATA-less	60283.2	33292.9
YDL033C	SLM3	TFIID	TATA-less	60283.2	33292.9
YDL035C	GPR1	TFIID	TATA-containing	89070.5	51866.3	31798.9	14320.2		2633	3117.7
YDL036C	PUS9	TFIID	TATA-less
YDL037C	BSC1	CR	TATA-less					3122.1	1715.6	2212.7
YDL039C	PRM7	CR
YDL040C	NAT1	TFIID	TATA-less	36508.8	24856.6	14873.2
YDL042C	SIR2	TFIID	TATA-less
YDL043C	PRP11	TFIID	TATA-less
YDL044C	MTF2	TFIID		51223.1	32611.4	16501
YDL045C	FAD1	TFIID	TATA-less	53997.3	32336.8
YDL045W-A	MRP10	TFIID	TATA-containing	90725.3	53367.1	45224.8	6249.9			502.5
YDL046W	NPC2	TFIID	TATA-containing	56260.3	32866	27652.6	9194	9093.4	9325.8	12036
YDL047W	SIT4	TFIID	TATA-less	47727.1	35219.6	45144	8372.6		12193	16151.2
YDL048C						50725.2	14011.4	41119.5	27925.5	44132.2
YDL049C						33283.7			6293.1	6234.9
YDL051W	LHP1	TFIID	TATA-less	106460	98439.5	49997	17763.3		3078.9	14667.8
YDL052C	SLC1	TFIID	TATA-less	106460	98439.5	50208.3	17763.3		3078.9	14667.8
YDL053C	PBP4	TFIID	TATA-containing	83944.3	53154.3	31625.1	8270.4		2321.3	4019.6
YDL054C	MCH1	TFIID	TATA-less	78523.9	41268.7	21895.1	4769.7			3572.8
YDL055C	PSA1	CR	TATA-containing			27783.2	7161.6	13285.2	9926.7	8164.4
YDL056W	MBP1	TFIID	TATA-less	82066.3	52010.1	18846
YDL057W
YDL058W	USO1	TFIID	TATA-less	103844	52511.6	23979.1	6904.4
YDL059C	RAD59	TFIID	TATA-less		57054.2
YDL060W	TSR1	TFIID	TATA-less				7479		2878.1	4654.7
YDL061C	RPS29B	TFIID	TATA-less			18547.6	7528.5		2887.5	4654.7
YDL063C	SYO1	TFIID	TATA-less
YDL064W	UBC9	TFIID		49422.1	29149.9	21964.2
YDL065C	PEX19	TFIID	TATA-less	49422.1	29149.9	22009.5
YDL066W	IDP1	CR	TATA-less	161498	74419.2	68503.9	24626.4			5193.1
YDL067C	COX9	TFIID	TATA-less	161498	74419.2	68503.9	24517.9			5808.2
YDL069C	CBS1	TFIID		57328.2	34695.2
YDL070W	BDF2	CR	TATA-containing				24387	16069.4	8692.3
YDL072C	YET3	TFIID	TATA-containing			37382.1	25308.5	16838.4	10410.5	18614.2
YDL073W	YDL073W	TFIID	TATA-less	114641	80826	47544.4	16698.4			3202
YDL074C	BRE1	TFIID	TATA-less	114641	80826	47544.4	17639.4			2986
YDL075W	RPL31A	TFIID	TATA-less			29376.6	13086.8		2795.4	8368.1
YDL076C	RXT3	TFIID		94421.3		50103.8	12013.4		1957.9	8394.6
YDL077C	VAM6	TFIID	TATA-less	96883.5	49241.9	28772.3				1651.5
YDL078C	MDH3	TFIID	TATA-containing	128226	58696.7	50845.4	7496.3			2639.4
YDL079C				102622	75527.9	35740.1	14015.8	6263.2	7787.9	31764.7
YDL080C	THI3	TFIID	TATA-less	134861	78100.2	53464.9	9558.4			3971.6
YDL081C	RPP1A	TFIID	TATA-less	78040.8	35694.3	32872.7	13657.6			3951.6
YDL082W	RPL13A	TFIID	TATA-less			27918.3	17051.6		5881.5	8503
YDL083C	RPS16B	TFIID	TATA-less				17246.1		5881.5	8186.6
YDL084W	SUB2	TFIID	TATA-less	111077	68369.2	45705.6	25418.9		2914.9	9607.7
YDL085C-A	YDL085C-A	TFIID	TATA-less	100738	48492.7		7632.8			1959.2
YDL085W				100738	48492.7		7648.3			1847.3
YDL086W	YDL086W	TFIID	TATA-containing	185792	81590.9	39734.2	14940.1			2689.8
YDL087C	LUC7	TFIID	TATA-less	185792	81590.9	39696.1	14815.9			2783.5
YDL088C	ASM4	TFIID	TATA-less	65429.1	40702.7	24372.5	4617.3
YDL089W	NUR1	TFIID	TATA-less	151372	92541.1	42038.9	6888.2
YDL090C	RAM1	TFIID		151372	92541.1	42038.9	6814.1
YDL091C	UBX3	TFIID	TATA-less	87720	55343.5	28872.3
YDL092W	SRP14	TFIID	TATA-less	141016	105262	37136.1	13683.2
YDL093W	PMT5	TFIID	TATA-less	45504	27932.6
YDL095W	PMT1	TFIID	TATA-less	117288	79431.6	51064.5	22519.1			9376.5
YDL097C	RPN6	TFIID	TATA-less	117288	73550	50430.8	22519.1			9376.5
YDL098C	SNU23	TFIID		77484.4	37823.1
YDL099W	BUG1	TFIID		61798.1	39536.6
YDL100C	GET3	TFIID	TATA-less	61798.1	39536.6
YDL101C	DUN1	TFIID	TATA-less
YDL102W	POL3	TFIID	TATA-containing	74195.4	40409
YDL103C	QRI1	TFIID	TATA-less	74195.4	40409
YDL104C	QRI7	TFIID	TATA-less
YDL105W	NSE4	TFIID	TATA-less	153047	80505.4	29165.9	17353.3
YDL106C	PHO2	TFIID	TATA-less	153047	86124.3	29175.6	17751
YDL107W	MSS2	TFIID
YDL108W	KIN28	TFIID	TATA-less
YDL109C	YDL109C	TFIID
YDL110C	TMA17	CR	TATA-containing			22270.1	9620.2		2072.5	6103.8
YDL111C	RRP42	TFIID	TATA-less	102395	52181.1	37260.7	9038.2			5349.6
YDL112W	TRM3	TFIID	TATA-less	92463.9	64928.7	22491.6	8450.5
YDL113C	ATG20	TFIID		92463.9	64928.7	22691.8	8450.5
YDL114W
YDL115C	IWR1	TFIID	TATA-less	77429.3	52375.6	25346.3
YDL116W	NUP84	TFIID	TATA-less	83204.7	68911.1	21322.4	5363.2
YDL117W	CYK3	CR	TATA-less	173998	91414.8	60428.1	10177.8			2691.3
YDL119C	YDL119C	TFIID	TATA-less	167148	111551	57858
YDL120W	YFH1	TFIID	TATA-less	133201	120491	41066.7	11980			2947.5
YDL121C	YDL121C	TFIID	TATA-less	133201	120491	41066.7	11980			2998.1
YDL122W	UBP1	TFIID				25029.4	8398.7		2332.6	5927.5
YDL123W	SNA4	CR	TATA-containing							3504.2
YDL124W	YDL124W	CR	TATA-containing				22125.2	44008.2	26364.1	62221.5
YDL125C	HNT1	CR	TATA-less	66876.5		49898.4		41870.1	16680.1
YDL126C	CDC48	TFIID	TATA-less	86906.4	41112.7	52868.2	14104	6362.6	3592.3	13493.7
YDL127W	PCL2	CR	TATA-containing			22704.8		4681.9	2656.6	5300.4
YDL128W	VCX1	TFIID	TATA-less			25356.7	6523.3			4760.4
YDL129W	YDL129W	TFIID	TATA-less
YDL130W	RPP1B	TFIID	TATA-less			28114.1	8274.2		2907.4	4875.1
YDL130W-A	STF1	TFIID	TATA-less	47122.2	49662.2	28612.2	4074.7		1565.9	1744.3
YDL131W	LYS21	TFIID	TATA-containing	44221.9	24783		6118.1			7449.2
YDL132W	CDC53	TFIID		65788.6	58900.7	33623.4	8237.1		1575	4010.1
YDL133C-A	RPL41B	TFIID	TATA-containing			51366.8	12044.8	10237.8	7460.1	8863.8
YDL133W	SRF1	TFIID		46837.9	37994.4		10994.1	11125.4	7460.1	8863.8
YDL134C	PPH21	TFIID		61078.1		54672.3	12784.5		2232.4	4206.6
YDL135C	RDI1	TFIID	TATA-less	65113.2						3778.3
YDL136W	RPL35B	TFIID	TATA-less				13994	6191	5773.1	9392.7
YDL137W	ARF2	TFIID		110948	102918	101304	27399.2	7094.2	6587.5	12286.9
YDL138W	RGT2	TFIID	TATA-less				6121.1		2549.8	6453.5
YDL139C	SCM3	TFIID	TATA-less	41225.4						2568.2
YDL140C	RPO21	TFIID		96380.6	63523.5	72921.8	13785		2679.9	4203.3
YDL141W	BPL1	TFIID	TATA-less	70559.5	38732.9
YDL142C	CRD1	TFIID		70559.5	38804.5
YDL143W	CCT4	TFIID	TATA-less	159890	131091	27489.1	7615.4			3353.3
YDL144C				159890	131091	27489.1	7613.4			3353.3
YDL145C	COP1	TFIID	TATA-less	165394	122246	47134.9	11539.9			2284.6
YDL146W	LDB17	TFIID	TATA-less	72746.7	42474.4	20189
YDL147W	RPN5	TFIID	TATA-less	54946.5	44399.4	32327.5
YDL148C	NOP14	TFIID	TATA-less	54946.5	44399.4	32320.6
YDL149W	ATG9	TFIID		54210.2	39932.9
YDL150W	RPC53	TFIID	TATA-less
YDL153C	SAS10	TFIID	TATA-less
YDL154W
YDL155W	CLB3	TFIID	TATA-less	58245.6	37485.6	29192.4	4512.6			1919
YDL156W	CMR1	TFIID	TATA-less	37465.1
YDL157C	YDL157C	TFIID	TATA-less	37420.5
YDL159W	STE7	TFIID	TATA-less	150053	125034	137702	29822.6			14135.8
YDL159W-A				90460.5	138822	62573.5
YDL160C	DHH1	TFIID	TATA-less	150053	125034	137702	29822.6			14135.8
YDL160C-A	MHF2	TFIID	TATA-less	52755.7	30712
YDL161W	ENT1	TFIID	TATA-less	73389.4	49106.6		8469.7
YDL164C	CDC9	TFIID	TATA-less	67389.9			8318.6
YDL165W	CDC36	TFIID		77358	38242.1
YDL166C	FAP7	TFIID	TATA-containing	77994.8	38334.9
YDL167C	NRP1	TFIID	TATA-less
YDL168W	SFA1	CR	TATA-less	89606.5	52789.4				1841.4	4915.3
YDL169C				31675.6	19538.2					977.6
YDL170W	UGA3	CR	TATA-less	62897			13250.1	5373.9	3425.2	3631.7
YDL171C	GLT1	TFIID	TATA-less	62895.2	32462.3	59487	13583.1	6137.4	3361.4	2874.3
YDL173W	PAR32	TFIID	TATA-less	123775	77232.4	35980.1	21926	4437.2	3306.6	12192.8
YDL174C	DLD1	TFIID	TATA-containing		68970.6	38827.3	17598.4	4265.5	1637.6	3507.6
YDL175C	AIR2	TFIID	TATA-less	121299	60403.5	35337.2	10047.3			3760.6
YDL176W	YDL176W	TFIID	TATA-less	69541.9	40828.3	19662.1	4313.1			1056.8
YDL177C	YDL177C	TFIID	TATA-less	69541.9	40828.3	19585.3	4362.1			1090.1
YDL178W	DLD2	TFIID	TATA-less	71419.8	32907.1	21358.2
YDL179W	PCL9	CR	TATA-less	49528.8	24558.8		4463.7		1487	3539.2
YDL180W	YDL180W	CR	TATA-less	77207.8	38669.6	28791.1				5169.6
YDL181W	INH1	TFIID	TATA-less	78394.1	38937.8	53140.4	25238.9		3194.9	16863.6
YDL182W	LYS20	CR	TATA-containing	56857.7	32412.8	35058.4		11750.5	10436.7
YDL183C	YDL183C	CR								3170.3
YDL184C	RPL41A	TFIID	TATA-less	67402.9	38774.3	107548	9389.5		4070.6	4157.2
YDL185W	VMA1	TFIID	TATA-less			24921.2
YDL186W
YDL188C	PPH22	TFIID	TATA-containing	114617	89874.5	82136.5	8899			2035.5
YDL189W	RBS1	TFIID	TATA-less	206522	147169	55374.8	18478.3			5146.4
YDL190C	UFD2	TFIID	TATA-less	206522	147169	55374.8	18478.3			5146.4
YDL191W	RPL35A	TFIID	TATA-less			33161	7827.4		2394.6	6661.9
YDL192W	ARF1	TFIID	TATA-less	102620	74921.6	60092.6	13103.8		2901	4144.6
YDL193W	NUS1	TFIID	TATA-less	77434.2	61893.5	20637.9
YDL194W	SNF3	TFIID	TATA-less	60169.2	36380.7					2262.8
YDL195W	SEC31	TFIID			68823.3	38900.6		3769.8	1694.4	7448.5
YDL197C	ASF2	TFIID	TATA-less	91801.9	49518.6	38236.9	12374.7			4613
YDL198C	GGC1	CR	TATA-less	75010.6	36228		6348			6859.5
YDL199C	YDL199C	TFIID		60115.6	28680.6					2477.3
YDL200C	MGT1	TFIID		51475.3
YDL201W	TRM8	TFIID	TATA-less
YDL202W	MRPL11	TFIID	TATA-less	142567	105959
YDL203C	ACK1	TFIID	TATA-less	142359	123650	25228.5
YDL204W	RTN2	CR	TATA-less		74508.4				2095.5	3443.2
YDL205C	HEM3	CR	TATA-less	102960	56207.1	36023	8802.9			4361.4
YDL206W	YDL206W	TFIID		95110.3	58344.8	24481.9
YDL207W	GLE1	TFIID	TATA-less	87178.4	55166	20225.3				3092.6
YDL208W	NHP2	TFIID	TATA-less	68527.9	48081.7	19455.3	6490.1			2457.9
YDL209C	CWC2	TFIID	TATA-less	68527.9	48081.7	19234.3	6490.1			2493.1
YDL210W
YDL211C	YDL211C	TFIID			16843.5
YDL212W	SHR3	TFIID	TATA-containing	51886	33311.4	15488.9	6979.7
YDL213C	NOP6	TFIID	TATA-less	51886			6839.9
YDL214C									3460.1	4749.2
YDL215C	GDH2	TFIID	TATA-less	88387.5	62225.5	33105	8344.6		8367.9	13239.6
YDL216C	RRI1	TFIID		49472.6	31238.8					1576.1
YDL217C	TIM22	TFIID	TATA-less	78453.4	42866	21519.1	6770.9			2258.1
YDL218W
YDL219W	DTD1	TFIID	TATA-less
YDL220C	CDC13	TFIID
YDL222C				41097.3	26525.6	27723.9		4227.1	11985.3	8203.4
YDL223C
YDL224C	WHI4	TFIID	TATA-less		94105.8
YDL225W	SHS1	TFIID	TATA-less	73697.6	52200.1	23008.3	8616.7			2898.4
YDL226C	GCS1	TFIID	TATA-less	73697.6	52200.1	22916.6	8616.7			2898.3
YDL227C	HO	CR	TATA-less
YDL229W	SSB1	TFIID	TATA-containing			29619.8			1863.1	2624.9
YDL230W	PTP1	TFIID	TATA-less	82319.1	39916.2
YDL231C	BRE4	TFIID	TATA-less	82319.1	39127.1	16388.3
YDL232W	OST4	TFIID	TATA-less	109497	67803.4	33025.4	11348.8			2519
YDL233W	MFG1	TFIID		91444.8	60212.8	37842.4	9361.3		3113.2	8408
YDL234C	GYP7	TFIID		91437.7	60212.8	38042.1	9327.5		3113.9	8408
YDL235C	YPD1	TFIID	TATA-less	62571.6	38515.9	26389.7	7531.8			2660.4
YDL236W	PHO13	TFIID	TATA-less	69655.4	43204.5	18154.3				2616
YDL237W	AIM6	TFIID		117678	69531.2	34632.5	4989
YDL238C	GUD1	TFIID		117678	69531.2	34632.5	4986.1
YDL239C	ADY3	TFIID
YDL240W	LRG1	TFIID	TATA-less	163272	113161	41341.7	11243.7
YDL241W	YDL241W	TFIID	TATA-containing	51436.2	32830.1					3015.3
YDL243C	AAD4	CR
YDL244W				38955.1
YDL245C
YDL246C
YDL247W
YDL248W	COS7	TFIID
YDR001C	NTH1	CR	TATA-containing	81444.8	47005.4	47804.1	11181.9		4055.3	7749.3
YDR002W	YRB1	TFIID	TATA-less				11181.9		4055.3	7749.3
YDR003W	RCR2	TFIID	TATA-less	106046	51952.1	73275.2	16609.3	9126.6	6141.6	31108.8
YDR003W-A	YDR003W-A	TFIID
YDR004W	RAD57	TFIID	TATA-less	65805	34437.4
YDR005C	MAF1	TFIID	TATA-less	59273.3	35899.5	28688.3				5840.9
YDR006C	SOK1	TFIID	TATA-less	61140	32842.8	42464.3	8064.4	5952.7	2679.6	6294.1
YDR007W				80389.9	61469.8	27729.4	6901.8	5453.9	3145.5	4626.5
YDR009W
YDR011W	SNQ2	CR	TATA-containing					12960.3	6265.9	4153.8
YDR012W	RPL4B	TFIID	TATA-less	88818.3	48131.8	32117.7	8608.8
YDR013W	PSF1	TFIID	TATA-less	34843.2	22063.1
YDR014W	RAD61	TFIID			18615.1
YDR014W-A
YDR016C	DAD1	TFIID	TATA-less	91991.7	59789.5
YDR017C	KCS1	TFIID		44254.9		24371.2	5320.7			4732.5
YDR018C										1597
YDR019C	GCV1	CR	TATA-containing	42636.1	20631.7
YDR020C	DAS2	TFIID	TATA-less
YDR021W	FAL1	TFIID
YDR022C	ATG31	TFIID	TATA-less
YDR023W	SES1	TFIID	TATA-containing	48576.8		24450.9	6952.5		2386.2	5478.8
YDR025W	RPS11A	TFIID	TATA-less			37888.7	14167			12512.6
YDR026C	NSI1	TFIID
YDR027C	VPS54	TFIID	TATA-less	131535	89370.6	46523.3	11268.4
YDR028C	REG1	TFIID	TATA-less	157642	86751.8	59357.2	34338		3084	3098
YDR030C	RAD28	TFIID		86172.8	55791.7	33942.2				1988.5
YDR031W	MIX14	TFIID		86172.8	55791.7	33942.2				1988.5
YDR032C	PST2	CR	TATA-containing	63457	46734.2	31293	7754.2		4098.1	12954.8
YDR033W	MRH1	CR	TATA-containing					7981.5	6356
YDR034C	LYS14	TFIID	TATA-less				12216.7			3405.1
YDR034C-A								5202	4096.9	7959.1
YDR034C-C					38176.2			6582	3464.9
YDR034C-D					38176.2			6582	3464.9
YDR034W-B							8528.8	4833.4	1884.3	1776
YDR035W	ARO3	TFIID	TATA-less	55451.7	42674.7	51997.5	8945.4	7925.5	3412	6108.7
YDR036C	EHD3	TFIID	TATA-less	76060.4	52400.6	39917.8	29640.3	7768.5	4646.2	8360.5
YDR037W	KRS1	CR	TATA-containing					8028.1	3210.1	7222
YDR038C				138852	68369.6	39869.5	10374.6			4052.4
YDR039C				141457	69044.9	38347.3				4356.3
YDR040C								18331.3		11109.3
YDR041W	RSM10	TFIID	TATA-less	47217.6	32403.7	28130.7	7571.5	22728.1	21675.5	11940.6
YDR042C
YDR043C	NRG1	CR	TATA-containing			28213.1			8160.4	9531.7
YDR044W	HEM13	TFIID	TATA-containing
YDR045C	RPC11	TFIID	TATA-less	27221.2
YDR046C	BAP3	CR	TATA-less			53300.1	10061		11720.7	22646
YDR047W	HEM12	TFIID	TATA-less	75064.7	44213.8	92756			25466.8	13278.1
YDR049W	VMS1	TFIID	TATA-less	34684.3	23048.4
YDR050C	TPI1	CR	TATA-less			62987.5	24819.2	93663.8	110642	44443.5
YDR051C	DET1	TFIID	TATA-less	54360	41974.7
YDR052C	DBF4	TFIID	TATA-less	59724	29870					5301.6
YDR054C	CDC34	TFIID	TATA-less	90046.1	55142.3	91783.3	32060.1	22549	14391.6	23596.5
YDR055W	PST1	CR	TATA-containing			36331.1			9878.4
YDR056C	YDR056C	TFIID	TATA-containing	76689.9	36493.5	23048.6
YDR057W	YOS9	TFIID	TATA-less	76689.9	36493.5	22963
YDR058C	TGL2	TFIID		59221.4	29126.9				1448.8	3937.3
YDR059C	UBC5	TFIID	TATA-containing	39159.5	22460.9	20221.2
YDR060W	MAK21	TFIID
YDR061W	YDR061W	TFIID	TATA-less	75307.6	48687.3	44101.3	9421.7			7080
YDR062W	LCB2	TFIID	TATA-less	113849	47604.2	64817.6	28645.7	8385.2	6696.7	35054.7
YDR063W	AIM7	TFIID		87609.6	45366.3	26144.2				5087.3
YDR064W	RPS13	TFIID	TATA-less	62808.7		41879.9	14909.5		2685.5	7778.3
YDR065W	RRG1	TFIID
YDR066C	RTR2	TFIID
YDR067C	OCA6	TFIID		98354.5	53326.7	37270.7	5459.3
YDR068W	DOS2	TFIID	TATA-less	98354.5	53326.7	37270.7	5456.5
YDR069C	DOA4	CR	TATA-less	124573	68319.1	44500.3	12768.1			7804.8
YDR070C
YDR071C	PAA1	TFIID	TATA-less	63579	38573.2	46249.2	10516.2			19903.7
YDR072C	IPT1	CR	TATA-less			83198.7	12219.7	54569.3	36521.2	58211.7
YDR073W	SNF11	CR	TATA-containing			38159.1	13777.8	63738.6	45765.4	32626.7
YDR074W	TPS2	CR	TATA-less				11551.9	55539	40735.7	58173
YDR075W	PPH3	TFIID	TATA-less
YDR076W	RAD55	TFIID	TATA-less
YDR077W	SED1	CR	TATA-containing					32263.1	53132.5	11363.6
YDR078C	SHU2	TFIID	TATA-less	110473	51831.9	40597.8	5841.6			2516
YDR079C-A	TFB5	TFIID		119494	62831.4	34138.2
YDR079W	PET100	TFIID		110473	51831.9	40597.8	5841.6			2516
YDR080W	VPS41	TFIID	TATA-less	119494	62831.4	34138.2
YDR081C	PDC2	TFIID	TATA-less	69273.1	53374.6		4634
YDR082W	STN1	TFIID	TATA-less	69273.1	53374.6		4648.2
YDR083W	RRP8	TFIID	TATA-less
YDR084C	TVP23	TFIID	TATA-less	78725.3	57980.8	21619.4	4192.4
YDR085C	AFR1	TFIID
YDR086C	SSS1	TFIID	TATA-less			26420.1	6219.8			3259.3
YDR087C	RRP1	TFIID	TATA-less
YDR088C	SLU7	TFIID	TATA-less	67006.1	34315.2	27472.2				1878.6
YDR089W	YDR089W	CR	TATA-less	54846.8	28908	28554.8	6843.1	5092.4	2582.8	8807.1
YDR090C	YDR090C	TFIID	TATA-containing	74801.3	43343.9	31891.8	6939.2			3071.6
YDR091C	RLI1	TFIID	TATA-less				4980.4
YDR092W	UBC13	TFIID		61741.7	39333.1	21512.9				2512.4
YDR093W	DNF2	TFIID	TATA-less	55575			12253.3	11235.1	7166.7	18164.2
YDR096W	GIS1	TFIID		48700.3	27739.9	53079.1	21981.5		10502.6	38621.9
YDR097C	MSH6	TFIID	TATA-less
YDR098C	GRX3	TFIID	TATA-less		16744.3					2797.3
YDR098C-A								39954	7359	6138.9
YDR098C-B								39954	7359	6138.9
YDR099W	BMH2	TFIID		82067.1	60012.3	93143	17494.5		6697.6	11462.3
YDR100W	TVP15	TFIID	TATA-less	89716.1	45780.7	48778.7	10570.9		1925.9	14415.8
YDR101C	ARX1	TFIID	TATA-less				5442.2			2060.9
YDR103W	STE5	TFIID	TATA-less		19414		5373.9			1982.1
YDR104C	SPO71	TFIID	TATA-less
YDR105C	TMS1	TFIID		159337	98558.5	55832.3	6771.6
YDR106W				159337	98558.5	55832.3	6793.6
YDR107C	TMN2	TFIID		54955.8	31276.3
YDR108W	TRS85	TFIID		54955.8	31301.5
YDR109C	YDR109C	TFIID		45074.2			5044.2
YDR110W	FOB1	TFIID	TATA-less	44955.7
YDR111C	ALT2	TFIID	TATA-less		32536.4	36959.3	8669.9	4100.6	2180	5831
YDR113C	PDS1	TFIID	TATA-less			27767.4	13279.7			2034.1
YDR114C				112732	81710.7	33724.1
YDR115W	YDR115W	TFIID	TATA-less	115510	81710.7	33429.1	13540.1			2715.8
YDR116C	MRPL1	TFIID	TATA-less	105650	82414.7	36258	6560.2
YDR117C	TMA64	TFIID	TATA-less	67015	45453.5	17791.7	4278.3
YDR118W	APC4	TFIID	TATA-less	67015	45453.5	17787.7	4261.9
YDR119W	VBA4	TFIID	TATA-less	42077	23465.7
YDR119W-A				19573.2	10988	6451.2	1377.6		327.1
YDR120C	TRM1	TFIID	TATA-less		21499
YDR121W	DPB4	TFIID	TATA-less		21740.5
YDR122W	KIN1	TFIID		110454	71498.3	23706.2	6869.6			7333.9
YDR123C	INO2	TFIID	TATA-less	57467.1			8005.2	5275.3	2167.3	8135.8
YDR124W				64807.3	37080.8	31996.3	8005.2	5521	2161.2	8135.8
YDR125C	ECM18	TFIID
YDR126W				96156.3	53650.2	29415.8
YDR127W	ARO1	CR	TATA-less	123098	70722.8	58270.5	13912.4	18209.5	5002	23332
YDR128W	MTC5	TFIID	TATA-less	45118.6	24068.1
YDR129C	SAC6	TFIID	TATA-less	57517.5	27807.6	48003	12443.2	9344.7	3598.8	19006.2
YDR130C	FIN1	TFIID	TATA-less	113299	84734.8	26536.2
YDR131C	YDR131C	TFIID	TATA-less	55028.2	30055.4
YDR132C	YDR132C	CR	TATA-less	62720.6	30243.1	27505.5		11902.4		5859.1
YDR134C						14080.7	4841.5	82060.3	75827.8	19715
YDR135C	YCF1	CR	TATA-containing	119702	73498.9	43644.6	12409		2749.9	7021.6
YDR137W	RGP1	TFIID	TATA-less	96325.7	47302.2				2749.9	2015.3
YDR138W	HPR1	TFIID	TATA-less	65779.8	41433.5	19252.5	7292.4		2111.1	3944.1
YDR139C	RUB1	TFIID		59387	33525.1	15451.9
YDR140W	MTQ2	TFIID	TATA-containing	59387	33525.1	15450.6
YDR141C	DOP1	TFIID	TATA-less	82443.7	57919.9	36853.5
YDR142C	PEX7	TFIID	TATA-less	62611.7	32418.5	17254.9
YDR143C	SAN1	TFIID	TATA-less	145535	107255	67093.5	13834.3
YDR144C	MKC7	TFIID	TATA-less	86746.3		24842.6	11480.5
YDR145W	TAF12	TFIID	TATA-less	86746.3	70330.7		11722.1			2375.3
YDR146C	SWI5	TFIID	TATA-less
YDR147W	EKI1	TFIID	TATA-less
YDR148C	KGD2	TFIID	TATA-less	149443	103598	85267.2	18412.8		2423.8	8047.8
YDR150W	NUM1	TFIID		147862		86266.2	19611.8		2423.8	8047.8
YDR151C	CTH1	TFIID	TATA-less	119053	85819	129198	18439.2	20545	7156.8	13509.7
YDR152W	GIR2	TFIID	TATA-less				18029.3	15906.9	7156.8
YDR153C	ENT5	TFIID	TATA-less	52444.3	27224.7	54625.5	15841.1	15668	6323.1	29481.8
YDR155C	CPR1	CR	TATA-containing			64258	29718.2	77379.5	38375.2	23212
YDR156W	RPA14	TFIID	TATA-less				27342.2	59164.1	11189.3	15711.7
YDR158W	HOM2	CR	TATA-less			39716.4	8467.9	15696.9	4292.3	14719.9
YDR159W	SAC3	TFIID	TATA-less	53152	32691.6					4363.5
YDR160W	SSY1	TFIID	TATA-less	53890.7	30499.8
YDR161W	YDR161W	TFIID	TATA-less
YDR162C	NBP2	TFIID	TATA-less	55644.9	27227.7
YDR163W	CWC15	TFIID	TATA-less	55644.9	27227.7
YDR164C	SEC1	TFIID	TATA-less	87234.9	48702.4	23159.3	4806
YDR165W	TRM82	TFIID	TATA-less
YDR166C	SEC5	TFIID		63200.9	44197.5	20859.6
YDR167W	TAF10	TFIID	TATA-less	63200.9	44197.5	20867.1
YDR168W	CDC37	TFIID	TATA-less	94489.4	55640	21305.8	5149.5
YDR169C	STB3	TFIID	TATA-less	138775	65859.1	56737.9	29385.9		4160	19894.9
YDR169C-A
YDR170C	SEC7	TFIID	TATA-less	86581.4	48791.4	52144	9950.8			6647.9
YDR170W-A								4654.4	1676.9	704.5
YDR171W	HSP42	CR	TATA-containing			90077	17811.5	88341.1	27873.4	16052
YDR172W	SUP35	TFIID	TATA-less	81000.6	42302.4	29039.3	12729.7			5559.6
YDR173C	ARG82	CR	TATA-less	107892	58576.6	65920	38082.5	12987.8	5478.2	12570.5
YDR174W	HMO1	TFIID	TATA-less	110654	55516.2	86237.6	37053.7	13632.8	4204.8	14880
YDR175C	RSM24	TFIID	TATA-less	111282	68318	53305.6	24945.6			9558.7
YDR176W	NGG1	TFIID	TATA-less	111282	68318	53305.6	24945.6			9558.7
YDR177W	UBC1	TFIID	TATA-less	79108.9	49565.6	35007.5	8015.9			6669.1
YDR178W	SDH4	TFIID	TATA-containing	171380	95005.4	58416.3	15422.2		3291.8	11355.5
YDR179C	CSN9	TFIID
YDR179W-A	YDR179W-A	TFIID
YDR180W	SCC2	TFIID	TATA-less	35369.7
YDR181C	SAS4	TFIID		49225.5	30569.8	17246	3784.6
YDR182W	CDC1	TFIID		49225.5	30569.8	17246	3739.7
YDR182W-A
YDR183W	PLP1	TFIID		74802.9	44932.5	18548.8
YDR184C	ATC1	TFIID	TATA-less
YDR185C										2700.2
YDR186C	YDR186C	TFIID	TATA-less	40998.1		24940.4	14654.4	9027.7	4137.2	13161
YDR188W	CCT6	TFIID	TATA-less	58993.3	45972.4	33243.3		9245.8	5083.7	10285.6
YDR189W	SLY1	TFIID	TATA-less	56847.8	33665
YDR190C	RVB1	TFIID	TATA-less	40308.7	32869.7	20486.8	5598.1
YDR191W	HST4	TFIID	TATA-less	40308.7	32869.7	20487.8	5580.3
YDR192C	NUP42	TFIID	TATA-less	57731.8
YDR194C	MSS116	TFIID	TATA-containing	133863	105228	44001.1	26407.8
YDR194W-A				103485	51590.5	38477.8	22590.6
YDR195W	REF2	CR	TATA-containing		78829.7	42961	27078.8
YDR196C	CAB5	TFIID	TATA-less	93626.4	48539	29326.2	7144.5			1706.1
YDR197W	CBS2	TFIID	TATA-less	93626.4	48539	29326.2	7149.3			1707.7
YDR198C	RKM2	TFIID	TATA-less
YDR200C	VPS64	TFIID	TATA-less	110729	71599.6	28989.5	4375.7
YDR201W	SPC19	TFIID		110729	71599.6	28989.5	4348.3
YDR202C	RAV2	TFIID		123265	69641.7	35361.4	6052.9
YDR204W	COQ4	TFIID		123265	69641.7	35361.4	6052.9
YDR205W	MSC2	TFIID	TATA-less	225537	154151	43057.7	10407.5		1891.1	3115.7
YDR206W	EBS1	TFIID	TATA-less	92586.8	53644.3	22301.8
YDR207C	UME6	TFIID	TATA-less	97250.1		64613.7	14734.3	4388.1	2624	4851.6
YDR208W	MSS4	TFIID	TATA-less	71619.6	51435.3	50730.4	14090.6	4449.4	3003	10650.6
YDR210C-C								40214.5	7458	6896.7
YDR210C-D								40214.5	7458	6896.7
YDR210W	YDR210W	CR	TATA-containing	72444.6	37092.6		9253.6		5189.3	9122
YDR210W-A				33912.2				8153.8	3049.7	2775.7
YDR210W-B				33912.2				8153.8	3049.7	2775.7
YDR211W	GCD6	TFIID	TATA-containing			22725.2			3027.4	5710.2
YDR212W	TCP1	TFIID	TATA-less	41243.3	30587.2
YDR213W	UPC2	TFIID						12418.7	6908.2	8979
YDR214W	AHA1	CR	TATA-less			55825.4	31363.9	48805.1	14043.2	30402.3
YDR216W	ADR1	TFIID				30988.5	9491.9	28264.7	14515.4	43953.7
YDR217C	RAD9	TFIID
YDR218C
YDR219C	MFB1	TFIID	TATA-less	106959	83674.7	28574.3				2879.3
YDR221W	GTB1	TFIID	TATA-less	106959	83674.7	28581.7				2879.3
YDR222W	YDR222W	CR	TATA-containing			30054.5		5405	4754
YDR223W										4749.3
YDR224C	HTB1	CR	TATA-containing	88684.7	62553	50238.1	22182	39185	19949.3	15000.1
YDR225W	HTA1	CR	TATA-containing						21930.9	7784.2
YDR226W	ADK1	CR	TATA-containing	82403.4		36964.3	11926.2	8299.2		12624.5
YDR227W	SIR4	TFIID	TATA-less	40880.2	22349.1
YDR228C	PCF11	TFIID	TATA-less	172265	113768	68785.3	12915.5		2062.6	6250.3
YDR229W	IVY1	TFIID		105237	60774.5	38111.2	8509.9			5306.2
YDR231C	COX20	TFIID	TATA-less	98559.2	50686.4	55702	16839.4	7299.8	4143	14076.2
YDR232W	HEM1	TFIID	TATA-less	98559.2	50686.4	56827.9	15907.8	7104	3777.5	14076.2
YDR233C	RTN1	TFIID	TATA-containing	66172.9	39198.9	65512.3	25416.2	19802.9	10290.3	35134.8
YDR234W	LYS4	TFIID	TATA-containing	60851.9	46158.2	46940.6		15286.2	12703.8
YDR235W	PRP42	TFIID	TATA-less	85852.9	43412.5	23652.5
YDR236C	FMN1	TFIID	TATA-less	170534	92387.2	37755.2
YDR237W	MRPL7	TFIID	TATA-less				11220.3
YDR238C	SEC26	TFIID	TATA-less	57245.8	37271.9	19701.3	6048.2			2315.8
YDR239C	YDR239C	TFIID	TATA-less
YDR240C	SNU56	TFIID		58411.9	31473.9	16661
YDR242W	AMD2	TFIID		53768.7	26058.7	14899.3	5133.3			2304.8
YDR243C	PRP28	TFIID		67034.1	34650.9	22885.8				4214.6
YDR244W	PEX5	TFIID	TATA-containing	67034.1	34650.9	22914.2				4214.6
YDR245W	MNN10	TFIID	TATA-less	65056.1	34739.7	33642.2	6526.9			4133.6
YDR246W	TRS23	TFIID	TATA-less	69341.9	35256.8	29529.7	6271			11784.2
YDR246W-A							8260.7		16800.7	17837.6
YDR247W	VHS1	CR	TATA-less			45102.5	12760.6	35699.2	35160.8	26708.5
YDR248C	YDR248C	TFIID	TATA-containing	46748.8
YDR249C	YDR249C	TFIID	TATA-less	104270	51140	66958.5	24680.5	17635.5	10312.1	30910.4
YDR251W	PAM1	TFIID	TATA-less	104270	51140	66954.3	24680.5	17635.5	10312.1	30910.4
YDR252W	BTT1	TFIID	TATA-less		26242
YDR253C	MET32	TFIID	TATA-less
YDR254W	CHL4	TFIID	TATA-less	124614	78200.2	62517.9	13757.1		3428.2	10645.2
YDR255C	RMD5	TFIID	TATA-less	89711.7	57113	30372.6	7814.8			6827.5
YDR256C
YDR257C	RKM4	TFIID	TATA-less		22161.1	18263.4				4216.8
YDR258C	HSP78	TFIID	TATA-containing					34882.8	16454.6	8181
YDR259C										5283.8
YDR260C	SWM1	TFIID	TATA-less	55026.4	41030.3	23337.6	8284.7		4730.5	7797.1
YDR261C	EXG2	TFIID	TATA-containing	55649.3	28544.8					3128.5
YDR261C-C								53610.3	8215.4	10561.8
YDR261C-D								53610.3	8215.4	10561.8
YDR261W-A								5780.1	1371.9	1312.1
YDR261W-B								5780.1	1371.9	1312.1
YDR262W	YDR262W	TFIID	TATA-containing	58215.3	32076.8	32508.3	10019.4	28255.6	8035.2	19895.9
YDR263C
YDR264C	AKR1	TFIID	TATA-less	156702	81157.1	41347.5	16873.7			3376
YDR265W	PEX10	TFIID	TATA-less	156702	81442.8	41347.5	16873.7			3376
YDR266C	HEL2	TFIID	TATA-less	47311.1	25214
YDR267C	CIA1	TFIID	TATA-less	87084.6	43545.9	21254.5	7015.6
YDR268W	MSW1	TFIID	TATA-less	87084.6	43361.4	21254.5	7173.4
YDR270W	CCC2	CR	TATA-less	45282	22658.2	16609.9	4206.8			2547.7
YDR272W	GLO2	TFIID	TATA-less	73320.1	34990.7		7241.8			3647.3
YDR273W
YDR275W	BSC2	CR				20700.8	6226.9		4363.4	11214.4
YDR276C	PMP3	CR	TATA-containing			59865.6	9668.7	25089.8	14956.1	17448.7
YDR277C	MTH1	TFIID	TATA-less					13294	13432.1	13813.5
YDR279W	RNH202	TFIID		55003.2	31763
YDR280W	RRP45	TFIID	TATA-less	49560.3	32241.4	23015	6277.7
YDR281C									2930.7	4366.2
YDR282C	YDR282C	TFIID	TATA-containing	61131
YDR283C	GCN2	TFIID		158509	113519	50146.3	13281.2			2791.5
YDR284C	DPP1	TFIID	TATA-less	136251	98450.8	41465.2	8592.1			2626.8
YDR285W	ZIP1	TFIID		136251	98450.8	41462.1	8592.1			2626.8
YDR286C	YDR286C	TFIID		139235	90503.8	45730.2	5775.5			1456.9
YDR287W	INM2	TFIID		139235	90503.8	45730.2	5790.7			1456.9
YDR288W	NSE3	TFIID	TATA-less	94092.8	49995.4	23112.7	4668.9			1460.8
YDR289C	RTT103	TFIID		81988.7	51307.3	30299.5
YDR291W	HRQ1	TFIID		81988.7	51307.3	30299.5
YDR292C	SRP101	TFIID	TATA-less		19683.7
YDR293C	SSD1	TFIID	TATA-less	56694	27294.6		8384.9	5317.5	5586.7	10966.3
YDR294C	DPL1	TFIID	TATA-containing	58764.2
YDR295C	HDA2	TFIID	TATA-less	85503.3	57666.7	43474.5	12479.7			9437.6
YDR296W	MHR1	TFIID	TATA-less	85503.3	57666.7	45176.7	11207.1			9437.6
YDR297W	SUR2	TFIID	TATA-containing			32936		6981.5	2635.2	19156.8
YDR298C	ATP5	TFIID	TATA-less	64071.3	37144.9
YDR299W	BFR2	TFIID	TATA-containing
YDR300C	PRO1	TFIID	TATA-less				15263.3			3119.8
YDR301W	CFT1	TFIID	TATA-less	140003	101195	37942.7	16053.8			2621.4
YDR302W	GPI11	TFIID
YDR303C	RSC3	TFIID	TATA-less	140078	77588.3	20133.9	8412.7
YDR304C	CPR5	TFIID		100326	56751.8	31156.5	5300.4			1863.7
YDR305C	HNT2	TFIID	TATA-less	95782.8	52043.4	21107.3
YDR306C	YDR306C	TFIID		123926	78042.1	27239.2	6791.3		1710.4	2961.8
YDR307W	PMT7	TFIID	TATA-less	115568	70292.4	24312.6			1710.4
YDR308C	SRB7	TFIID	TATA-less	43354.7	28055.8
YDR309C	GIC2	CR	TATA-containing					3687.5	2684	4258.6
YDR310C	SUM1	TFIID	TATA-less	36534.2	24049.9	21136.3	8610.2			2028.6
YDR311W	TFB1	TFIID	TATA-less	40891.1	34976.6	17991.4	9298.8
YDR312W	SSF2	TFIID	TATA-less
YDR313C	PIB1	TFIID	TATA-less	51710.3	25066.2	22985.1	12454.9			7141.9
YDR314C	RAD34	TFIID	TATA-less	48919.2	25411.5	14573
YDR315C	IPK1	TFIID		50273.1	24689.7
YDR316W	OMS1	TFIID	TATA-less	50273.1	24689.7
YDR316W-A						14395.7		15669.4	955.5	6357.8
YDR316W-B						14395.7		15669.4	955.5	6357.8
YDR317W
YDR318W	MCM21	TFIID		121738	74149.5	40529.2	6468.6
YDR319C	YFT2	TFIID	TATA-less	122156	54400.2	50112.7	12863.1			5845.8
YDR320C	SWA2	TFIID	TATA-less			28255.3
YDR320C-A	DAD4	TFIID		119538	63164	28440.4	5964.6
YDR321W	ASP1	TFIID	TATA-less	119538	63164	28440.4	5964.3
YDR322C-A	TIM11	TFIID	TATA-containing	74069.1	37886.6	24575.3	11984.1			3321.3
YDR322W	MRPL35	TFIID	TATA-less	49080.6	29729.7
YDR323C	PEP7	TFIID	TATA-less	65880.8	44528.9
YDR324C	UTP4	TFIID	TATA-less
YDR325W	YCG1	TFIID	TATA-less
YDR326C	YSP2	TFIID	TATA-containing	134491	93959.7	51208.4	8624.4			2421.3
YDR328C	SKP1	TFIID	TATA-less	143052	114688	27915.7	8455.3			2987.1
YDR329C	PEX3	TFIID	TATA-less	142653	105347	40003.5	23240.3			3848.8
YDR330W	UBX5	TFIID	TATA-less	142653	105347	40003.5	23240.3			3848.8
YDR331W	GPI8	TFIID	TATA-less	101343	62893.6	29362.8
YDR332W	IRC3	TFIID	TATA-less	75347
YDR333C	RQC1	TFIID	TATA-less		90177.9		25958.8			13260.9
YDR334W	SWR1	TFIID	TATA-less	210676	120143	97460	25958.8			13260.9
YDR335W	MSN5	TFIID	TATA-less	142422	90965.1	63390.6	9519.2			5468.4
YDR336W	YDR336W	TFIID		67020.8	33736.6
YDR337W	MRPS28	TFIID	TATA-less	132860	79108.7	38201.3	7507.8
YDR338C	YDR338C	TFIID		106570	65382	26090.9	4568.3
YDR339C	FCF1	TFIID	TATA-less	62390.2	33906.5		6533.4			2126.4
YDR341C	YDR341C	TFIID	TATA-less	39256.8
YDR342C						20987.7	5329.4	79688.6	195744	70347.3
YDR343C								13937.2	45693.6	15545.9
YDR345C	HXT3	CR	TATA-containing					9969.4	5393.8
YDR346C	SVF1	TFIID		128194	85255.7	49854.4	8459.3	3946.4	1667.1	7180.5
YDR347W	MRP1	TFIID	TATA-less	128194	85255.7	49854.4	8459.3	3939.6	1667.1	7180.5
YDR348C	PAL1	TFIID	TATA-less	52919.5	29596.8	18110.6				2273
YDR349C	YPS7	TFIID	TATA-less	92901.7	65466.2		5144.1			2348.7
YDR350C	ATP22	TFIID	TATA-less	93974.5	58818.6	34816.7	11830.9			4841.1
YDR351W	SBE2	TFIID	TATA-less	93974.5	58818.6	34816.7	11836.4			4841.1
YDR352W	YPQ2	TFIID		57506.2	27201.2	17907.5				3541.2
YDR353W	TRR1	CR	TATA-less	98557	71613.2	44016.6	12021.9	6040.6	2606.7	13848.8
YDR354W	TRP4	TFIID	TATA-less	76925.6	42364.1	39765	6054	5506.2	2249.5	10196.5
YDR356W	SPC110	TFIID
YDR357C	CNL1	TFIID	TATA-less						1962.4	2534.7
YDR358W	GGA1	TFIID	TATA-containing	86717.8	83638.7	26584			1962.1	2520.1
YDR359C	EAF1	TFIID	TATA-less
YDR361C	BCP1	TFIID	TATA-less	46215.3	30653.8	12947.4	4204.8
YDR362C	TFC6	TFIID	TATA-less	123018	96150.5	30197.1	6453.1			1613.5
YDR363W	ESC2	TFIID	TATA-less	123018	96150.5	30197.1	6453.1			1613.5
YDR363W-A	SEM1	TFIID	TATA-less	95276.2	60112	39952.5	4827.9	1449.2	542	980.6
YDR364C	CDC40	TFIID	TATA-less	38987.5
YDR365C	ESF1	TFIID	TATA-less	36050.1	22169.8				5846
YDR365W-A				33172	17353.3			25045.9	4044.5	4476.2
YDR365W-B				33172	17353.3			25045.9	4044.5	4476.2
YDR366C				53917.2	26190.9
YDR367W	KEI1	TFIID	TATA-less	54040.6	26170.5			19825.1	4797.4	6755.7
YDR368W	YPR1	TFIID	TATA-less	59981.1	36291.3	22388.8	5728.7			3561.5
YDR369C	XRS2	TFIID		62310.8
YDR370C	DXO1	TFIID	TATA-less	124060	59834.1	36121.8	8121			2617.9
YDR371W	CTS2	TFIID	TATA-less	124060	60306.3	36121.8	8123.5			2600.6
YDR372C	VPS74	TFIID	TATA-less	114760	70170.3	58193.3	28633.4			8449.3
YDR373W	FRQ1	TFIID	TATA-less	114760	70170.3	58193.3	28633.4			8449.3
YDR374C
YDR374W-A	WIP1	TFIID	TATA-less		19593.2
YDR375C	BCS1	TFIID	TATA-less	124651	62920.3	41437.5	12196.8			2590.7
YDR376W	ARH1	TFIID		124651	62920.3	41437.5	12196.8			2590.7
YDR377W	ATP17	TFIID	TATA-less	107591	56623.5	50713	12647.1		2323	12082
YDR378C	LSM6	TFIID	TATA-less	171761	149723	69797.8	16076.9	3286.4		3583.4
YDR379C-A				92754.2	57821.7	37179.5	10662		3522.1	6664.5
YDR379W	RGA2	TFIID	TATA-less				13880.7	3275.3		2399.9
YDR380W	ARO10	CR							3522.1	8788.8
YDR381C-A	YDR381C-A	TFIID	TATA-containing				10101.6
YDR381W	YRA1	CR	TATA-containing	101703	61985.5	126354	12325.7			4803.1
YDR382W	RPP2B	TFIID	TATA-less			23713.9	9629
YDR383C	NKP1	TFIID		31730.8
YDR384C	ATO3	TFIID	TATA-less						3371.6	8966.4
YDR385W	EFT2	TFIID	TATA-less	47812.3	30927.8	45595.9	16821.4	15870.5	7052.2	23321.4
YDR386W	MUS81	TFIID	TATA-less
YDR387C	YDR387C	TFIID	TATA-less	104822	63415.9	42671.6	9699.1			9264.3
YDR388W	RVS167	TFIID	TATA-less	104822	63415.9	42671.6	9698.7			9264.3
YDR389W	SAC7	TFIID				20288.6	12465.9	5260.5	3629.6	6296.3
YDR390C	UBA2	TFIID	TATA-less
YDR391C	YDR391C	TFIID								3098.1
YDR392W				79239.6	38378.5	23851.8	5301.1			4322.7
YDR393W	SHE9	TFIID	TATA-less	68638.1	34415.4		4113.6			8740.5
YDR394W	RPT3	TFIID	TATA-less	164277	112002	56647.3	14953.4			11911.3
YDR395W	SXM1	TFIID	TATA-less
YDR397C	NCB2	CR	TATA-containing	86829.8	46060.3		17305.6			4310.4
YDR398W	UTP5	TFIID	TATA-less				17293.2			3943.8
YDR399W	HPT1	CR	TATA-less			23977.5	9167.5	9281.3	4497.6	13473.5
YDR400W	URH1	TFIID	TATA-less
YDR402C
YDR403W
YDR404C	RPB7	TFIID	TATA-less	102672	75373.1	54605.5	24789.2			11591.7
YDR405W	MRP20	TFIID	TATA-less	102672	75373.1	54605.5	24789.2			11591.7
YDR406W	PDR15	CR	TATA-containing	41821.7	33032.8	17409.3		6902.3	3607.6	5174.4
YDR407C	TRS120	TFIID	TATA-containing	137378	95392.5	50999.4	14738.7			2722.9
YDR408C	ADE8	TFIID	TATA-less	142458	66558.4	40026.4	18901.6		2257.1	3659.2
YDR409W	SIZ1	TFIID	TATA-less	142458	66558.4	40016.5	23219.2		2257.1	8882.6
YDR410C	STE14	TFIID	TATA-containing	105867	96955.9	24308.4
YDR411C	DFM1	TFIID	TATA-less	102288	82296.8	29657.7	6166.8			1957.8
YDR412W	RRP17	TFIID	TATA-less	102288	82296.8	29758.6	6104.8			1966.8
YDR414C	ERD1	TFIID		71525.5	39071.3	24237.9
YDR415C	YDR415C	TFIID	TATA-less	98595.5	52252.4	34534.6
YDR416W	SYF1	TFIID	TATA-less	98595.5	52252.4	34534.6
YDR418W	RPL12B	TFIID	TATA-less			28510.5	22774.6		3005.5	11886.9
YDR419W	RAD30	TFIID		68343	32164.8
YDR420W	HKR1	TFIID	TATA-less	63930.4	34339.3	23937.4	5642.6			2319
YDR421W	ARO80	TFIID		44555.1	23269.7
YDR422C	SIP1	TFIID	TATA-less	121206	96489.9	36393.2
YDR423C	CAD1	TFIID	TATA-less	210021	159082	77665.1	22851.3			5643.9
YDR424C	DYN2	TFIID	TATA-less	185020
YDR425W	SNX41	TFIID		184979
YDR427W	RPN9	TFIID	TATA-less	139642	88479	44148.5	16984			4254.2
YDR428C
YDR429C	TIF35	TFIID	TATA-less	49491.8	32556.4
YDR430C	CYM1	TFIID		141347	129682	43102.6	17495			7489.6
YDR432W	NPL3	TFIID	TATA-less	141347	129682	43102.6	17495			7489.6
YDR434W	GPI17	TFIID	TATA-containing	104102	67547.8
YDR435C	PPM1	TFIID		134411	73471.2	50397.9	11111.4			6323.1
YDR436W	PPZ2	TFIID	TATA-less	137766	84523
YDR437W	GPI19	TFIID	TATA-less	82512.1	47602.3	16620.7
YDR438W	THI74	TFIID
YDR439W	LRS4	TFIID	TATA-less	64647.8	35559.5	17865.2
YDR440W	DOT1	TFIID
YDR441C	APT2	TFIID	TATA-containing		20067.4	21794.1			1314.1
YDR443C	SSN2	TFIID	TATA-less	76230.7	33254.1
YDR444W	YDR444W	TFIID	TATA-less	76230.7	33254.1
YDR446W
YDR447C	RPS17B	TFIID	TATA-less				10416		2723.6	12645.3
YDR448W	ADA2	TFIID	TATA-containing		35629.7	34983.9	10416		2723.6	12645.3
YDR449C	UTP6	TFIID	TATA-less				4148.9
YDR450W	RPS18A	TFIID	TATA-less	32946.5		34947.4	7477.3		2042.5	7418.5
YDR451C	YHP1	CR	TATA-containing				6488.4
YDR452W	PPN1	TFIID	TATA-less	72069.8	58891.2	37106.2	6759			1825.5
YDR453C	TSA2	CR	TATA-less	76610.2					2415.9
YDR454C	GUK1	TFIID	TATA-less
YDR456W	NHX1	TFIID	TATA-less	74479.5	59213.8	20440.9	7938.4
YDR457W	TOM1	TFIID	TATA-less	64362.4	36187.9		7363.4
YDR458C	HEH2	TFIID	TATA-less	60017.3	36368.3	19966.2
YDR459C	PFA5	TFIID	TATA-less	106240	54020	29806.3
YDR460W	TFB3	TFIID	TATA-less	106240	54020	29764.3
YDR461C-A				105772	92597.5	20968.6	6086.3
YDR461W
YDR462W	MRPL28	TFIID	TATA-less	105772	92597.5		6086.3
YDR463W	STP1	TFIID	TATA-less	118786	106025	57078.2	6642.9
YDR464W	SPP41	TFIID	TATA-less	42829.2	23040.9
YDR465C	RMT2	TFIID	TATA-less
YDR466W	PKH3	TFIID	TATA-less	47734.9	40972.9		5241.6
YDR468C	TLG1	TFIID	TATA-less	84059.2	56078	27318.3
YDR469W	SDC1	TFIID		84059.2	56078	27329.5
YDR470C	UGO1	TFIID		84060.2	71166.4	54847.4	17388.4		3422.4	13454
YDR471W	RPL27B	TFIID	TATA-less				17167.8		3422.4	13454
YDR472W	TRS31	TFIID	TATA-less	79819.9	44164.9	109139	14592.8	5066	2373.6	1909
YDR473C	PRP3	TFIID	TATA-less	68774.1	36442.2
YDR475C	JIP4	TFIID	TATA-less	106822	57611.8	50068.5	11619.3		1604.5	6360.5
YDR476C	YDR476C	TFIID	TATA-containing	189570	109242	51314.9	13693.4		1738.4	2958.2
YDR477W	SNF1	TFIID	TATA-less	190870	145133	50247.8	16341.5			5934.4
YDR478W	SNM1	TFIID	TATA-less
YDR479C	PEX29	TFIID	TATA-less	183488	87466.8	46807.7	20980.8			3490.3
YDR480W	DIG2	TFIID	TATA-less	183488	87466.8	46807.7	21307.4			3509.4
YDR481C	PHO8	TFIID	TATA-containing	86314.5	34356	29129.6			4529.6	5939.1
YDR482C				81428	44009.2	46458.9	17609.5	13651.6	14004.1	21362.9
YDR483W	KRE2	TFIID	TATA-less	81428	44009.2	46458.9	17609.5	13651.6	14004.1	21362.9
YDR484W	VPS52	TFIID	TATA-less	80482.7	52753.5	26653.5
YDR485C	VPS72	TFIID		114770	67249.6	33059.7
YDR486C	VPS60	TFIID	TATA-less	78102.3	48525.7	23677.9
YDR487C	RIB3	CR	TATA-containing	38071.1		22071.9		8042.9	6274.4	11440.8
YDR488C	PAC11	TFIID	TATA-less	43189.4	31793.7	20627.4
YDR489W	SLD5	TFIID	TATA-less	43800.1	31793.7	20614.6
YDR490C	PKH1	TFIID	TATA-less	45306.7	37574					1340.2
YDR492W	IZH1	CR	TATA-containing			20577.2				1238.3
YDR493W	MZM1	TFIID	TATA-less	76545.6	54343.3	18999.8
YDR494W	RSM28	TFIID	TATA-less	120897	99332.1	30215.1	7462.6			2436.2
YDR495C	VPS3	TFIID	TATA-less	39944.1
YDR496C	PUF6	TFIID	TATA-less
YDR497C	ITR1	CR	TATA-containing							3410.4
YDR498C	SEC20	TFIID	TATA-less	46973.4	39161.3	21753.3
YDR499W	LCD1	TFIID	TATA-less	28399.3	21091.3
YDR500C	RPL37B	TFIID	TATA-less			22259.3	6504.7			4951.1
YDR501W	PLM2	TFIID
YDR502C	SAM2	CR	TATA-less	61223.5	45291.8	49233.7	7374.9	2907		3949.5
YDR503C	LPP1	TFIID	TATA-less	75498.1	49843.3	20809.6
YDR504C	SPG3	TFIID
YDR505C	PSP1	TFIID		71968.8	42371.5	47020.3	14376	5198.9	4630.1	35170.2
YDR506C	GMC1	TFIID	TATA-less	70100.8	44279.9	29138.8				3049.1
YDR507C	GIN4	TFIID	TATA-less
YDR508C	GNP1	CR	TATA-containing			37883.4	6739.9	12173	12003.4	14606.1
YDR510W	SMT3	TFIID	TATA-less		37717.1	39522.4	7667.2		6707.1	4711.8
YDR511W	SDH7	TFIID	TATA-less	140010	98048.1	68582.6	6658.6
YDR512C	EMI1	TFIID	TATA-less	149991	86615.3	63106	14725.6	5196.4	3757.7	13778.3
YDR513W	GRX2	CR	TATA-containing	149991	86615.3	63106	14725.6	5196.4	3757.7	13778.3
YDR514C	YDR514C	TFIID			31418.6
YDR515W	SLF1	TFIID			31426.8
YDR516C	EMI2	TFIID	TATA-containing			38087.4	14926.9	18553.1	13842.5	34766.1
YDR517W	GRH1	TFIID	TATA-less	68826.7	38239.4		14241.8	14361.6	7333.7	25376
YDR518W	EUG1	TFIID	TATA-less	39056.1						3032
YDR519W	FPR2	TFIID	TATA-less	59528.5	46684.8	19709.5
YDR520C	URC2	TFIID	TATA-less	47601.8	26844.9		5655
YDR522C
YDR523C
YDR524C	AGE1	TFIID	TATA-less		20106.7	24901.2	7492.9	7650.7	6231.4	14307.4
YDR524C-B	YDR524C-B	CR	TATA-containing					20751.5	17428.5	7754
YDR524W-C								20751.5	17428.5
YDR525W-A	SNA2	TFIID	TATA-less		7252.3	9075.8	6410.3	15706.4	13483.1	21824.9
YDR527W	RBA50	TFIID			22215.5	43510	14532.4	12284.9	5296.2	11968
YDR528W	HLR1	CR	TATA-containing
YDR529C	QCR7	TFIID	TATA-less	84392.3	49603.3	36311.5	18744.3			13149.8
YDR530C	APA2	TFIID	TATA-less	88187.6	58113.8		10173.7			7929
YDR531W	CAB1	TFIID	TATA-less	88187.6		33082.4	10173.7			7929
YDR532C	KRE28	TFIID	TATA-less	75160.6	43376	27971.3
YDR533C	HSP31	CR	TATA-containing						3855.4	10216.8
YDR534C	FIT1	CR	TATA-less
YDR536W									1192.7
YDR538W	PAD1	TFIID
YDR539W	FDC1	TFIID	TATA-less
YDR540C
YDR541C	YDR541C	TFIID
YDR542W
YDR545W								7049	7850.5	3831.4
YEL001C	IRC22	TFIID	TATA-less		31788		4759.7
YEL002C	WBP1	TFIID	TATA-less	77319.9	48624.9	25504.7	7222.6
YEL003W	GIM4	TFIID	TATA-less	71020.2	32686.8	21426.6
YEL004W	YEA4	TFIID		54738.8	31385.8	17577.4
YEL005C	VAB2	TFIID		54738.8	31385.8	17682.1
YEL006W	YEA6	TFIID	TATA-containing	75724.2	42282.8	27416.2				4813.8
YEL007W	MIT1	CR	TATA-less			18025.6	4757.4	12806.4	7485.2	15465.1
YEL009C	GCN4	CR				28778.8	7887.8	17825.6	9810.6	12369.1
YEL011W	GLC3	CR		68099	40540.7		11724.9	12948.9	15677	28127
YEL012W	UBC8	TFIID	TATA-less	118575	85106.9	89512.5	14632.4	4730.4	5014.7	15807.4
YEL013W	VAC8	TFIID	TATA-less	169572	132032	93967.1	19814.9		2799.9	6298.6
YEL015W	EDC3	TFIID	TATA-less	69108.8	45547.2	25014.8
YEL016C	NPP2	TFIID		69108.8	45547.2	24938.2
YEL017C-A	PMP2	CR	TATA-less	38709.9	26430.7	69425.5	24052.5	16413	10309.7	26064.1
YEL017W	GTT3	TFIID	TATA-less	47540.4	39902.1	29793.1		12935.4	7349.5
YEL018W	EAF5	TFIID	TATA-less	63572.5	35989.5
YEL019C	MMS21	TFIID		63572.5	35989.5
YEL020C	YEL020C	TFIID		40179.1
YEL020W-A	TIM9	TFIID	TATA-containing	45131.7	41182.2					1070.6
YEL021W
YEL022W	GEA2	TFIID	TATA-less	71976.8	48084.7					2318.9
YEL023C	YEL023C	TFIID		71976.8	48084.7					2318.9
YEL024W	RIP1	TFIID	TATA-less	78906.3	48747.8	49490.2	8041.1			6148.3
YEL025C	YEL025C	TFIID	TATA-less	67786.1	41324.4	27705.1	7103.9			6240.1
YEL026W	SNU13	TFIID	TATA-less	85120.4	39218.8	67120.1	13563.6		3183.7	6778.7
YEL027W	VMA3	TFIID	TATA-less	70288.1	63933.2	50175.3	13042.5	6083.7	4130.2	3928.2
YEL029C	BUD16	TFIID	TATA-less	69470.3	38733.9
YEL030W
YEL031W	SPF1	TFIID	TATA-less	123358	104486	39145.8	13112.7			3237.6
YEL032W	MCM3	TFIID	TATA-less						2853.5
YEL033W	MTC7	CR
YEL034W	HYP2	CR	TATA-containing			34057.7	9490.9	17441.3	11594.4	26043.5
YEL035C						34057.7	9490.9	17182.6	11594.4	26043.5
YEL036C	ANP1	TFIID	TATA-less	41118.5	29839.1	38657.4	19803	21897.9	16654.5
YEL037C	RAD23	TFIID	TATA-less	99157	61697.5	47157.8	10153.7		2391.3	12533.1
YEL038W	UTR4	TFIID	TATA-less							4406.8
YEL039C										4406.8
YEL040W	UTR2	CR	TATA-containing						1502.6	1470.3
YEL041W				46325.9	27538.2
YEL042W	GDA1	TFIID	TATA-less			45755.3
YEL043W	YEL043W	TFIID	TATA-less	83783.8	44143.7	21303	6508.6			3901.8
YEL044W	IES6	TFIID	TATA-less				9067.3	35970.9	7817.3	19530.2
YEL046C	GLY1	CR	TATA-containing			54374.4	11273.3	41112.7	20507.5	22312.9
YEL047C	FRD1	TFIID	TATA-containing	44373.3	21689.4					3431.6
YEL048C	TCA17	TFIID	TATA-less
YEL049W
YEL050C	RML2	TFIID	TATA-less	118468	83300.3	40714.2	14752.7		1866.3	3393.1
YEL051W	VMA8	TFIID	TATA-less	225220	168004	64139.5	16974		1622.5	5920.5
YEL052W	AFG1	TFIID	TATA-less	120376	71327.9	25758.7	8134.4
YEL053C	MAK10	TFIID	TATA-less	120376	71327.9	25758.7	8143.6
YEL054C	RPL12A	TFIID	TATA-less			18962.8	10758		2188.4	4112.9
YEL055C	POL5	TFIID
YEL056W	HAT2	TFIID	TATA-less	77370.5	54871.1	20391	4780.1
YEL057C										1876.3
YEL058W	PCM1	TFIID	TATA-less	35094.8	20778.9
YEL059C-A					36217					2336.1
YEL060C	PRB1	CR	TATA-containing				8901.3	11646.4	4787.8	6945.1
YEL061C	CIN8	TFIID	TATA-less	41527						2981.4
YEL062W	NPR2	TFIID	TATA-less	127882	94420.5	38873.3	7113.8
YEL063C	CAN1	TFIID	TATA-less	100287	73206.9	68301.7	11991.4	5111.3	1822.3	4915.9
YEL064C	AVT2	TFIID
YEL065W	SIT1	CR	TATA-containing							1862.6
YEL066W
YEL067C
YEL068C	YEL068C	TFIID	TATA-less	60905	33637.1
YEL069C
YEL070W
YEL071W	DLD3	CR	TATA-containing				15026.2	17497.5	5265.9	20174.7
YEL072W	RMD6	TFIID	TATA-less	70463.5	54631.3	69946.8	20909.5		3904.2	12472.5
YEL073C
YEL075C
YEL076C
YEL076C-A
YEL077C
YER001W	MNN1	CR	TATA-containing			24096	5443.2	3405.3	1984.5	3545
YER002W	NOP16	TFIID	TATA-less	101599	63708.2	28112.1	8418.3			2616.3
YER003C	PMI40	TFIID	TATA-less	95375.1	46658.1	26302.7	8221.2			2428.4
YER004W	FMP52	TFIID	TATA-less	95375.1	46658.1		7475
YER005W	YND1	TFIID	TATA-containing	54529.2	28304.5	16010
YER006W	NUG1	TFIID	TATA-less	50235.9	29625.8
YER007C-A	TMA20	TFIID	TATA-less	84208.4	43348.4	25809.6
YER007W	PAC2	TFIID
YER008C	SEC3	TFIID	TATA-less	117255	64560.3	46541.6	10034.7			2826.5
YER009W	NTF2	TFIID		117255	64560.3	46541.6	10034.7			2838.5
YER010C	YER010C	TFIID	TATA-less
YER011W
YER012W	PRE1	TFIID	TATA-less	158964	120156	54692	9079		1740.9	7786
YER013W	PRP22	TFIID	TATA-less	103159	48633.4	37373.1	9519.3			2754.9
YER014C-A
YER014W	HEM14	TFIID			33530.1
YER015W
YER016W	BIM1	TFIID	TATA-less	85712.3	47212.4	23315.1
YER017C	AFG3	TFIID	TATA-less	85297.8	79915.5	64654.6	11507.9		1820.4
YER018C	SPC25	TFIID	TATA-less	55550.1	32569.3		8114.2			4024.6
YER019C-A	SBH2	TFIID	TATA-less	96177.4	63344.8	75634.1	32470.5	18200.3	14849.6	26768.2
YER019W	ISC1	TFIID	TATA-less	55426.6	32569.3		7873.6			4024.6
YER020W	GPA2	TFIID	TATA-containing	94244.1			28934.5	18158.3	9274.8	27415.7
YER021W	RPN3	TFIID	TATA-less	67113.4	40637.5	37303.6	8687.8		2828.4	11574.7
YER022W	SRB4	TFIID	TATA-less	48961.8	28481.7
YER023W	PRO3	TFIID	TATA-less	59018.9	40238.8				3665.4
YER024W	YAT2	TFIID
YER025W	GCD11	TFIID	TATA-less	55236.3	32007.5	11791.7	5465.7			1648.6
YER026C	CHO1	CR	TATA-containing	78248.1	37451.8		7076.5		1769.6	3154.7
YER027C	GAL83	TFIID	TATA-less	54719.2	35511.3	15680.3				2405
YER028C	MIG3	CR	TATA-containing			20487				2830.8
YER029C	SMB1	TFIID	TATA-less	46756.8	23524.1					3127.3
YER030W	CHZ1	TFIID		46756.8	23524.1					3127.3
YER031C	YPT31	TFIID	TATA-less	58450.7	30645.6	16384	4738
YER032W	FIR1	TFIID	TATA-less	58450.7	30428.5	16360	4738
YER033C	ZRG8	TFIID	TATA-less	70325.9	45689	35953.2	7624.2		2263.8
YER034W	YER034W	TFIID							2212.6	2528.8
YER035W	EDC2	CR	TATA-containing			43968.7	8732.2	21757.6	11613.5	13887.3
YER036C	ARB1	TFIID	TATA-containing	31947.2	20818.9	56905.2		5422	2485.6	4165.9
YER037W						23012.6	7138.2	6326.7	6987.3	15831.3
YER038C	KRE29	TFIID		78126.6	39331.2	21003.2
YER038W-A				34798.6	17258.8	10880.1
YER039C				49792.5	31416.9					1845.3
YER039C-A	YER039C-A	TFIID		49792.5	31416.9					1845.3
YER040W	GLN3	TFIID	TATA-less	49792.5	31416.9					1845.3
YER041W	YEN1	TFIID
YER042W	MXR1	CR	TATA-containing	42862.9						3126.4
YER043C	SAH1	CR	TATA-less	52295.8	32236.8	28991.8	7138			6450.6
YER044C	ERG28	CR	TATA-containing	54149.2	38426.4	25763.7	9535.4	5185.1	2786.5	7489.1
YER044C-A
YER045C						22977.7			3238.6
YER046W	SPO73	TFIID		49737				11771.4	3471.9	5115.6
YER047C	SAP1	TFIID	TATA-less	90638.1	55949.8	34556.1	8416.2			4242.6
YER048C	CAJ1	TFIID	TATA-less	77586.7	40666.8	24619.5	5240			4668.6
YER048W-A	ISD11	TFIID	TATA-less	63380.6	33450.2	27042.2	5480.3
YER049W	TPA1	TFIID	TATA-less	111914	55700.3	31558	6033.5			1741
YER050C	RSM18	TFIID	TATA-less	124556	69571.7	42681.4	13973.4		1528.6	4597.2
YER051W	JHD1	TFIID	TATA-less	124556	69571.7	42770.9	13973.4		1529.6	4597.2
YER052C	HOM3	CR	TATA-containing	44140.1		23447.6	9698	10894.2	4817.3	17215.8
YER053C	PIC2	CR	TATA-less	78088.9	43384.5	43171.8	19476.2	14441.6	12259.5	21467.6
YER053C-A								5205.9	4636.7	5807.7
YER054C									6752.5
YER055C	HIS1	CR	TATA-less			39231.6		22999.4	7433.6	12017.3
YER056C	FCY2	CR	TATA-containing			30531.2			8725.9	15861.3
YER056C-A	RPL34A	TFIID	TATA-less				10342.9	7597.2	7670.9	11375.7
YER057C	HMF1	TFIID	TATA-less				9741.3
YER058W				100901	54343.1		9541.7			3004.9
YER059W	PCL6	TFIID	TATA-less	109652	70993.1	47109.6	8830.6		2255.6	10933.9
YER060W	FCY21	TFIID	TATA-containing
YER060W-A
YER061C	CEM1	TFIID	TATA-less
YER062C	GPP2	CR	TATA-containing					12065.1	34975.8	6815.7
YER063W	THO1	TFIID	TATA-less	99804	64206.6	45764.3	17087.7	17017	8717.6	19388.3
YER064C	VHR2	CR	TATA-containing				6563.9	26059.4	15959.4	25034.7
YER065C	ICL1	TFIID	TATA-less			35551.6	6072
YER066W				104505	70808.4
YER067W	RGI1	CR		78199.5	59443.4	40064.5	15474.3	22874.7	76500.2	46632.8
YER068W	MOT2	TFIID	TATA-less	75601.4	49115.7	36150.4	10522.7		4700.3	9129.9
YER069W	ARG5,6	CR	TATA-less				5519.3	12677.8	10109.7	9570.6
YER070W	RNR1	CR	TATA-containing
YER071C	TDA2	TFIID	TATA-less	118125	73454.5	77625.6	20631.7	11659.2	7004.2
YER072W	VTC1	CR	TATA-less	118125	73454.5	76776	20739.1	11659.2	7004.2	12689.4
YER073W	ALD5	CR	TATA-containing					54229.4	8962.9	25766.3
YER074W	RPS24A	TFIID	TATA-less				10360.3		3984.7	8356
YER074W-A	YOS1	TFIID	TATA-less	77442.5	59643	34943.4	3944.5
YER075C	PTP3	TFIID	TATA-less			17886.5		4676.4	1681.8	3771.6
YER076C				69197.3	35572.3	25648.6
YER077C	YER077C	TFIID	TATA-less
YER078C	ICP55	TFIID		108252	52419.8	59479.6	20628.6	3904.4	2323.8	13990
YER078W-A				99480.7	50072	53885.5	8249.8	2411.6	774.6	1415.2
YER079W	YER079W	TFIID	TATA-less	108252	52419.8	60060.7	20628.6	3910.4	2323.8	13990
YER080W	AIM9	TFIID	TATA-less	67238.7	38410.8	27820.8	5470.2			2604.5
YER081W	SER3	CR	TATA-containing
YER082C	UTP7	TFIID	TATA-less	41968
YER083C	GET2	TFIID	TATA-less		22972.1		4906			1816.4
YER084W					22972.2		4971.6			1856.7
YER085C				32273.6	21443.3	15395.4	3560.2
YER086W	ILV1	TFIID	TATA-less	32273.6	21477.5	15381.7	3583.9
YER087C-B	SBH1	TFIID	TATA-less	50494.4			5985			2965.1
YER087W	AIM10	TFIID	TATA-less	46515.8	24672.7
YER088C	DOT6	TFIID	TATA-less			27330.1	13580.1	24943.8	11686.7	31495.5
YER089C	PTC2	TFIID	TATA-less	87801.9	57480.9	86826.6	14482.3	6153.3	2622.7	14662.9
YER090W	TRP2	TFIID	TATA-less	87801.9	57809.8	89685.8	14482.3	6158.6	2622.7	14662.9
YER091C	MET6	CR	TATA-containing			25021		7096.8	3186.4	6715.3
YER092W	IES5	TFIID	TATA-containing				6933.1	6816	4427.5	4627.8
YER093C	TSC11	TFIID	TATA-less	163242	120564	47379
YER093C-A	AIM11	TFIID		130694	81668.1	31748.5
YER094C	PUP3	TFIID	TATA-less	122729	120057	76205.3	12756.2			2934.6
YER095W	RAD51	TFIID					11915.6			2672.3
YER096W
YER098W	UBP9	TFIID		89993.7	52063.8	43938.8	11396.3	6135	5060.8	16602.6
YER099C	PRS2	TFIID		149313	147942	44300.9	17931.8			3199.9
YER100W	UBC6	TFIID	TATA-less			44300.9	17238.6			2482.7
YER101C	AST2	TFIID	TATA-less	110386	87896.9	46386.3
YER102W	RPS8B	TFIID	TATA-less
YER103W	SSA4	TFIID	TATA-less	84426.6	50985.2	37315.1	7838	6510.6
YER104W	RTT105	TFIID	TATA-less	69583	32361.4
YER105C	NUP157	TFIID	TATA-containing	75717.6	51511.2	22810.1
YER106W				75717.6	51511.2	22843
YER107C	GLE2	TFIID		93053.6	65115.2	37189.1
YER109C				71314.9	42616	19833.1
YER110C	KAP123	TFIID	TATA-less
YER111C	SWI4	TFIID	TATA-less		27799
YER112W	LSM4	TFIID	TATA-less	57748.8	57869.4	65359.8	4407.3			1463.5
YER113C	TMN3	TFIID	TATA-less	42246.1
YER114C	BOI2	TFIID	TATA-less	36426	24951	22908.2	6592			3188.7
YER115C	SPR6	TFIID		42938.3	22900.1
YER116C	SLX8	TFIID	TATA-less	54245.9	34246.8	27611.3	15230.4
YER117W	RPL23B	TFIID	TATA-less			29564.4	15272.6			8567.7
YER118C	SHO1	TFIID	TATA-containing
YER119C	AVT6	TFIID	TATA-less	206262	120064	79254.5	31098.7			14416.6
YER120W	SCS2	TFIID	TATA-less	206262	120064	79254.5	31098.7			14416.6
YER121W				159907	76402.6	50900	6548.9			1447
YER122C	GLO3	TFIID	TATA-containing	148293	112750	48596.4	22599.5
YER123W	YCK3	TFIID	TATA-less	148293	112750	48596.4	22599.5
YER124C	DSE1	CR	TATA-containing					9711.2	10078	4070.6
YER125W	RSP5	TFIID		94072.2	79235.3	78201.5	12624.5	7674.2	3947.5	8616.9
YER126C	NSA2	TFIID	TATA-less
YER127W	LCP5	TFIID	TATA-less
YER128W
YER129W	SAK1	TFIID		84540.4	56957.1	30925.6	8539.4			1869
YER130C	COM2	CR	TATA-containing				7954	8280	5776.4	7201.5
YER131W	RPS26B	TFIID	TATA-less			29023.4	7430.7	5340	3580.1	7569.9
YER132C	PMD1	TFIID	TATA-less	68441.9		29827.9	8716.1		2601.3
YER133W	GLC7	TFIID	TATA-less	113532	76644.4	69285.8	14371.7	4449.9	2620.7	14559.7
YER134C	YER134C	TFIID	TATA-less	137708	79690.5	53828.7	7971.5
YER136W	GDI1	TFIID	TATA-less	74222.4	44496.6	72431	18057.4	14029.6	5970.5	18175.2
YER137C								12458.9	5649.2
YER137C-A								47961.9	4713.5	11292.9
YER138C								47961.9	4713.5	11292.9
YER138W-A	YER138W-A	CR						11282.8	1393.1	2840.3
YER139C	RTR1	TFIID		87188.4	45723.3	33601.4
YER140W	EMP65	TFIID		87188.4	46219.4	33601.4
YER141W	COX15	TFIID	TATA-less	114268	70839.2	67303.1	20404.8			9644.6
YER142C	MAG1	TFIID	TATA-less	152900	91669	44626.4				4403.1
YER143W	DDI1	TFIID		152900	91669	44626.4				4403.1
YER144C	UBP5	TFIID	TATA-less	61774.5				8583.7	4735.5	6750
YER145C	FTR1	CR	TATA-containing					8843	2425.7
YER146W	LSM5	TFIID	TATA-less			24874	11781.1	9204.3	4446.7	8805.1
YER147C	SCC4	TFIID		99870.7	71428.2	34180.1	11550.5			4343.5
YER148W	SPT15	TFIID	TATA-less	99870.7	71428.2	34180.1	11616.6			4343.5
YER149C	PEA2	TFIID	TATA-less	50201.8	30054.1	39596.3		15244.6	15593.2
YER150W	SPI1	CR	TATA-containing			27826.3	12767.3	18567.1	30955.9
YER151C	UBP3	TFIID	TATA-less	43893.2	22049.5		4875.9			2469.9
YER152C	YER152C	TFIID							1640.9
YER153C							4752.5	6690.4	3088.4	3628.5
YER154W	OXA1	TFIID	TATA-less	61451.1	31841.2	15262.9	4806.9	6228.5	2967.4	3628.5
YER155C	BEM2	TFIID	TATA-less	75265.1	35803.5		8237			6130.7
YER156C	YER156C	TFIID	TATA-less	121952	62069.1	28368.6	12221.8
YER157W	COG3	TFIID	TATA-less	121952	65610.4	28368.6	12855.2			2802.9
YER158C						28419.4	5806.1	15772.7	8422.3	12565
YER159C	BUR6	CR	TATA-less			16241.6	5613.6	13032.7	11532.4	10273.5
YER159C-A				48689.6					5783.1	6372.9
YER160C				48689.6					5783.1	6372.9
YER161C	SPT2	TFIID	TATA-less	126366	98486	34982.8	10072.3			3872.6
YER162C	RAD4	TFIID	TATA-less	126722	68383.3	31783.1	5954.4			2274
YER163C				139620	100625	106716	23775.1		3281.4	15043.2
YER164W	CHD1	TFIID	TATA-less	91119	59982.9	41792.7	6073.3			1593.8
YER165W	PAB1	TFIID		96372.5	47189	60573.2	13130.2			8494.9
YER166W	DNF1	TFIID	TATA-less	43881.7	24413.3	13971.3
YER167W	BCK2	TFIID	TATA-less
YER168C	CCA1	TFIID	TATA-less	62398.9	53656.5			7078.6	6634.1
YER169W	RPH1	TFIID	TATA-less	68395.4	44838.6	48537.8	8579.5	7081	6634.1	4923
YER170W	ADK2	TFIID	TATA-less	65461.2	39488.8	16336.5
YER171W	RAD3	TFIID	TATA-containing	83745.1	49183.9	28759.2	6323			1755.9
YER172C	BRR2	TFIID	TATA-less	97572.7	64087.3	27839.8
YER173W	RAD24	TFIID		97572.7	64087.3	27839.8
YER174C	GRX4	TFIID	TATA-less	74170.3	40708.6	21438.1	5273.7			2126.5
YER175C	TMT1	TFIID
YER175W-A	YER175W-A	TFIID
YER176W	ECM32	TFIID	TATA-less	74811.1	42960.9	49530.5	13402.6			4689.1
YER177W	BMH1	CR	TATA-less			40528.1	14337.8	45994.8	16704.1	54981.6
YER178W	PDA1	TFIID	TATA-less	69853	43525.6	53924.6	19188.7	12946.9	6339	22962
YER179W
YER180C	ISC10	TFIID
YER180C-A	SLO1	TFIID	TATA-less							2448.4
YER182W	FMP10	TFIID		161338	118995	66646.1	6002
YER183C	FAU1	TFIID	TATA-containing	115408	65860.9	41640.4
YER184C	TOG1	TFIID	TATA-less	46532	29097.1	19752.6	8272.5	4959.9	3649.7	7243.2
YER185W				45482.9	28760.6	19031.7	8272.5	4965	3649.7	7243.2
YER186C	YER186C	TFIID		63289	40114.5	29988.5				1866.3
YER187W
YER188C-A								5151.9	4440.9	4274.9
YER189W								5154.9	4440.9
YER190W								5154.9	4440.9
YFL001W	DEG1	TFIID		53156	33436.4
YFL002C	SPB4	TFIID		53156	33436.4
YFL002W-A				37910.6	22061.9			7681.8	2147.6	2717.6
YFL002W-B				37910.6	22061.9			7681.8	2147.6	2717.6
YFL003C
YFL004W	VTC2	CR	TATA-less	232670	102392	72684	24240.9	5426.8	3458.8	14516
YFL005W	SEC4	TFIID	TATA-less	161440	124297	45244.8	11068.8
YFL007W	BLM10	TFIID	TATA-less	47426.1	23706.6	18990.4
YFL008W	SMC1	TFIID	TATA-less	68056.6	43555.2	15505	6330.9
YFL009W	CDC4	TFIID	TATA-less	86631.3	47511.4	24036.6	7490.3			2348.3
YFL010C	WWM1	TFIID	TATA-less	86631.3	47511.4	24036.6	7490.3			2348.3
YFL010W-A						12452.4			4291.6	6297.8
YFL011W
YFL012W
YFL013C	IES1	TFIID	TATA-less	85166.8	58907.3	52208.4	13152.7			4431.2
YFL014W								5786.2	44891.3
YFL016C	MDJ1	TFIID	TATA-less			35203.1	8375.9	14088.7	14932.9	12620.6
YFL017C	GNA1	TFIID	TATA-containing
YFL017W-A	SMX2	TFIID	TATA-less	95732.2	80338.6		6503.9	2960.2	628.9	3055.1
YFL018C	LPD1	TFIID	TATA-containing	149181	140694	76106.9	22671.6	7185	5357.4	5602.6
YFL020C
YFL021W	GAT1	CR	TATA-containing	58146.7		30912.3	12375.5	13688	7143.7	8178.1
YFL022C	FRS2	TFIID	TATA-less			23032.3		21989.6	14540.8	23401.5
YFL023W	BUD27	TFIID	TATA-less			22958.2		14435.7	9359.1	24120.5
YFL024C	EPL1	TFIID	TATA-less	84332.2	51025	27930.1	15099.1	14435.7	9359.1	24120.5
YFL025C	BST1	TFIID	TATA-less	63033.9	39798.5
YFL026W
YFL027C	GYP8	TFIID	TATA-less	55778.3	35812.6
YFL028C	CAF16	TFIID	TATA-less	54772.3	34175.5
YFL029C	CAK1	TFIID	TATA-less	124009	75214.1	34759.6
YFL030W				101285	46930	37155.2	6602.9			3420.8
YFL031W	HAC1	CR	TATA-less			46256.5	29224.9	18363.6	13629.8	9924.3
YFL033C	RIM15	TFIID	TATA-less	98706.4	69907.6	91624.3	28546.5	13203.7	5071	13030.9
YFL034C-A	RPL22B	TFIID	TATA-less			34286.8	10810.5
YFL034C-B	MOB2	TFIID	TATA-less	44641	24512.3	17572.3
YFL034W	YFL034W	TFIID	TATA-less	94203.3	52363.4	37078.9	10811.5
YFL036W	RPO41	TFIID	TATA-less	55928	40955.6	56689.3	5846.9		1793.3	5266
YFL037W	TUB2	TFIID	TATA-less	69267.2	65707.9	44785.8	13465.5	3096.1	1816.8	7258.5
YFL038C	YPT1	TFIID	TATA-less	69267.2	68341.6	44785.8	13465.5	3100.4	1816.8	7258.5
YFL039C	ACT1	TFIID	TATA-less	80458	53379.6	104571	35751	20563	11783.2	33400.9
YFL040W
YFL041W	FET5	TFIID	TATA-containing	97469.7	45689.9	26821.4
YFL041W-A				113488	66821	29488.1	3276.3
YFL042C	YFL042C	TFIID	TATA-less	129388	83421.8	40759.6	4715.4
YFL044C	OTU1	TFIID	TATA-less	157541	110685	40214.8
YFL045C	SEC53	TFIID	TATA-less	69969.2	41203.8	27972.9	7130.6			2169.3
YFL046W	FMP32	TFIID		84950.2	47848.6	23077.6
YFL047W	RGD2	TFIID	TATA-less	91848.3	71319.6	22030.8
YFL048C	EMP47	TFIID	TATA-less	91848.3	71319.6	22032
YFL049W	SWP82	TFIID	TATA-containing	76833.3	51743.8
YFL050C	ALR2	TFIID		76833.3	51743.8
YFL051C
YFL052W				52173.9	31982.8	20408.7	12082.9		1575.3	14004.7
YFL053W					20097
YFL054C				38252.7	21668.6					2070.7
YFL055W				92773.9	60294	44018.5	9076.2			3429.6
YFL058W
YFL059W
YFL060C
YFL061W
YFL062W
YFL064C
YFL065C
YFL066C
YFR001W	LOC1	TFIID	TATA-less
YFR002W	NIC96	TFIID	TATA-less	57512.9	38864.8	36008.9	7489.2			1693.5
YFR003C	YPI1	TFIID		186422	141204	69115.2	27148.9		2694.7	17237.1
YFR004W	RPN11	TFIID	TATA-less	186422	141204	69115.2	27148.9		2698.3	17237.1
YFR005C	SAD1	TFIID	TATA-less	80689.6		30423	12854.5	4795.9	3187.8	24679.3
YFR006W	YFR006W	TFIID		80657.2		30727.9	12854.5	4798.6	3187.8	24679.3
YFR007W	YFH7	TFIID	TATA-less	169582	88681.1	57015.9
YFR008W	FAR7	TFIID	TATA-less	182779	106103	56051.9	8745.8
YFR009W	GCN20	TFIID	TATA-less		54068.2	29558.6
YFR010W	UBP6	TFIID	TATA-containing	90954.2	59010.5	21994
YFR011C	MIC19	TFIID	TATA-less	71861.9	45076.8
YFR012W
YFR012W-A
YFR013W	IOC3	TFIID	TATA-less		27777
YFR014C	CMK1	TFIID		60459.6	38741.4	26668.9	9820.4	6042.3	5146.5	17269.3
YFR015C	GSY1	CR	TATA-containing			22448.2	10845.7	42700	25965.2	21325.5
YFR016C	YFR016C	TFIID	TATA-less	79400.7	51991.7	41327.2	5988.1			3802.8
YFR017C							4397	10170.5	6571.7	7530.1
YFR018C				60471.4	40225.6		9344.4	7551	2177.2	7113
YFR019W	FAB1	TFIID		60471.4	40225.6		9166.3	7551	2177.2	7113
YFR020W	YFR020W	TFIID				23281.9
YFR021W	ATG18	TFIID	TATA-less	205083	128074	62661.7	10067.2
YFR022W				97961	44682.8		8750.9		2614.9	5056.3
YFR023W
YFR024C-A	LSB3	TFIID	TATA-less	112053	64837	27701.9	6055.8			2981.6
YFR025C	HIS2	TFIID	TATA-less	111914	63567.6	30855.7				1929.8
YFR026C				94922.2	50384.9
YFR027W	ECO1	TFIID		94922.2	50384.9
YFR028C	CDC14	TFIID	TATA-less	105853	79285	17514.3	6941			1663.1
YFR029W	PTR3	TFIID	TATA-less	73269.4	39005.5	16521.9
YFR030W	MET10	TFIID	TATA-containing	62733.9	33724.8	19363.9				3509.4
YFR031C	SMC2	TFIID	TATA-less	39508	21434.7
YFR031C-A	RPL2A	TFIID	TATA-less			33736.7	10426.3		3063.6	3872.8
YFR032C
YFR032C-A	RPL29	TFIID	TATA-less	58107.7	31418.1	94581.5	15749.4		3976.1	10270.3
YFR032C-B	YFR032C-B	TFIID					15163.4		3667.9	8811.6
YFR033C	QCR6	CR	TATA-less			26447.3		6872.3	4547.4	9825.1
YFR034C	PHO4	CR	TATA-less	35201.3	23805	28353.5	7789.8	6339.9	4332.4	11655.7
YFR035C								6843.4	4633.3	6983.1
YFR036W								6622.4	4633.3	6941.2
YFR037C	RSC8	TFIID	TATA-less	76192.1	46462.7	17697.3				2981.3
YFR038W	IRC5	TFIID	TATA-less	76192.1	46462.7	17661.9				2986.9
YFR039C	OSW7	TFIID	TATA-less	91439.5	67147.4		11380.4		1298	2215.7
YFR040W	SAP155	TFIID	TATA-less	89890.9	67920	36294.9	11342.9		1296.4	2393.4
YFR041C	ERJ5	TFIID	TATA-less	84504.9	53399.3	22508.2
YFR042W	KEG1	TFIID	TATA-less	84504.9	53399.3	22508.2
YFR043C	IRC6	TFIID		83902.3	45752.8
YFR044C	DUG1	TFIID	TATA-less	188464	116486	66753.9	15015			3716.8
YFR045W	YFR045W	TFIID
YFR046C	CNN1	TFIID		102808	49657.7	30910
YFR047C	BNA6	TFIID
YFR048W	RMD8	TFIID	TATA-less	73908.9		29682.8	5933.6
YFR049W	YMR31	TFIID	TATA-less	139750	116382	49305	7598.8			1173.8
YFR050C	PRE4	TFIID	TATA-less	119064	97497.2	62822.6	12827.5		2794.4	6648.7
YFR051C	RET2	TFIID	TATA-less	122548	105226	65753.2
YFR052W	RPN12	TFIID	TATA-less	150350	121186	61756.7	19600.1			9295.6
YFR053C	HXK1	CR	TATA-containing			28751.9	8708.1	92617	168838	101422
YFR055W	IRC7	TFIID	TATA-containing			14155.6			1875.5
YFR057W
YGL001C	ERG26	TFIID	TATA-containing	92181.5	52813.4	44693.9	6245.4			2540.4
YGL002W	ERP6	TFIID		148572	90132.4	55580.3	13351.2			3556.5
YGL003C	CDH1	TFIID		148572	90132.4	55580.3	13351.2			3556.5
YGL004C	RPN14	TFIID	TATA-less	71871.1	36256.1	21371.2	3787			1243.6
YGL005C	COG7	TFIID	TATA-less	88562.6	51643.8	24194.5
YGL006W	PMC1	TFIID	TATA-less			32367.9	14530.2	22448.3	13176.9	23671.3
YGL006W-A						29298.9	11598.6	19141.4	6172.7	7651
YGL007C-A	YGL007C-A	TFIID					7107.8	32714	17803.7	21598
YGL008C	PMA1	CR	TATA-containing					32714	15753.6
YGL009C	LEU1	TFIID	TATA-less	41839.6		20051.9	4563.5
YGL010W	MPO1	TFIID	TATA-less	170852	129668	56007.6	21790.4			11067.3
YGL011C	SCL1	TFIID	TATA-less	170852	129668	56007.6	21790.4			11067.3
YGL012W	ERG4	CR	TATA-containing						2314.6	4424.9
YGL013C	PDR1	TFIID	TATA-less	73631.5	44018.6	20898.9	5313.7		1870.4	3611.8
YGL014W	PUF4	TFIID	TATA-less	82918.9	78713.3	47527.9
YGL015C				82918.9	78713.3	47527.9
YGL016W	KAP122	TFIID	TATA-less
YGL017W	ATE1	TFIID		118051	65866.7	31728.1
YGL018C	JAC1	TFIID		118051	65866.7	31728.1
YGL019W	CKB1	TFIID		83408.4	52178.6	17800	4417.6
YGL020C	GET1	TFIID		83408.4	52178.6	17796	4423.4
YGL021W	ALK1	TFIID	TATA-less
YGL022W	STT3	TFIID	TATA-less	80325.2	59057.7		9155.3			4103
YGL023C	PIB2	TFIID	TATA-less	80325.2	59057.7		9155.3			4103
YGL025C	PGD1	TFIID	TATA-less
YGL026C	TRP5	TFIID	TATA-less	73201.1	37855
YGL027C	CWH41	TFIID	TATA-less		22096.9
YGL028C	SCW11	CR	TATA-less					11305.8	6406.4	5404.8
YGL029W	CGR1	TFIID	TATA-less
YGL030W	RPL30	TFIID	TATA-less			31265.5	14107.6		2203.9	4615.5
YGL031C	RPL24A	TFIID
YGL032C
YGL033W
YGL035C	MIG1	TFIID	TATA-less			26534.3		25792.5	10312.3	26876.1
YGL036W	YGL036W	TFIID		74838.8	53425.1	79016	13606.1	82753.1	40307	25340.8
YGL037C	PNC1	CR	TATA-containing			38739.6	12499.4	92530	57258.9	27568.1
YGL038C	OCH1	CR	TATA-less	36956.1	19916	38701.8	11390.8	26367.1	10219.4	10250.7
YGL039W	YGL039W	TFIID	TATA-less
YGL040C	HEM2	TFIID	TATA-containing	62642.3	38926.4	30965.5	6736.1		1611.6	5509
YGL041C-B				73943.6	38650.2	22131.7
YGL041W-A	YGL041W-A	TFIID	TATA-less	71079	36267.4	20312.9
YGL043W	DST1	TFIID	TATA-less	136657	87501.2	36732.1	9954.8			5193.8
YGL044C	RNA15	TFIID	TATA-less	136657	87501.2	36896.6	9932.2			5193.8
YGL045W	RIM8	TFIID			31547.8	35990.2			6617.3
YGL047W	ALG13	TFIID		53308.4	30285.4	20750.6				3189.2
YGL048C	RPT6	TFIID	TATA-less	53308.4	30285.4	20685.2				3189.2
YGL049C	TIF4632	TFIID	TATA-less	70514	35097.7	27695.1	5098.3			3877.4
YGL050W	TYW3	TFIID	TATA-less	65586.6	29442.7	25874.1				3161.3
YGL051W
YGL053W				174053	87609.8	53738.2		4944	2256.9	3758.4
YGL054C	ERV14	TFIID		65347.1	42514.4	57496.8	9476.6	5170.6	3977.6	13418.1
YGL055W	OLE1	CR	TATA-containing	63340.1	39873	54902.3		21878.4	8790.3	17782.8
YGL056C	SDS23	TFIID	TATA-less				9116.9		7904.6
YGL057C	GEP7	TFIID	TATA-less	38213.7
YGL058W	RAD6	TFIID	TATA-less	80416.2	39670.7	26426.1	10357.2		1807.7	6014.3
YGL059W	PKP2	TFIID		41768.5	24973
YGL060W	YBP2	TFIID		38665.7
YGL061C	DUO1	TFIID		38660.2
YGL062W	PYC1	CR				27537.8	5941.7	11772.4	12074	20757.9
YGL063W				95617.7	60755.1	28200.6	7422			4080
YGL064C	MRH4	TFIID	TATA-less	95617.7	60755.1	28200.6	7424.2			4080
YGL065C	ALG2	TFIID	TATA-less	44692.6	24757.5
YGL066W	SGF73	TFIID	TATA-less	135614	91608.1	40505.8	10106.7			1910.8
YGL067W	NPY1	TFIID	TATA-less	74506.9	39883.6	23131.3
YGL068W	MNP1	TFIID	TATA-less	147982	110415	35385.8	16882			3562.1
YGL070C	RPB9	TFIID	TATA-less	147982	110415	35385.8	16882			3562.1
YGL071W	AFT1	TFIID	TATA-less	69109.9	39833	49600.2	11301	11583.7	5099.9	8220.8
YGL073W	HSF1	TFIID	TATA-less	97167.7	48964.1	31708.4	14448.5			4435.3
YGL075C	MPS2	TFIID	TATA-less	97167.7			14840.6			3795
YGL076C	RPL7A	TFIID	TATA-less	44369.3	26112.4	30924.3	9520.8	5486.2	2987.8	3391.5
YGL077C	HNM1	CR	TATA-containing	56309.9		27822
YGL078C	DBP3	TFIID	TATA-less
YGL079W	KXD1	TFIID	TATA-less	90405.6	51439.7	24309.2
YGL080W	MPC1	TFIID	TATA-less	78414.7	48274.2	31657.1	7444.8			4242
YGL081W
YGL082W	YGL082W	TFIID	TATA-less	76637.6	42908.6	29155.4	7308.3			4432.9
YGL083W	SCY1	TFIID	TATA-less
YGL084C	GUP1	TFIID	TATA-less	72248.7	52956.2	29133.9	6438
YGL085W	LCL3	TFIID	TATA-containing	53720.7
YGL086W	MAD1	TFIID	TATA-less	174151	109343	76816.6	21312.6			4163.6
YGL087C	MMS2	TFIID	TATA-less	174151	109343	76816.6	21312.6			4163.6
YGL089C	MF(ALPHA)2	CR								15018.6
YGL090W	LIF1	TFIID		96758.2	50928					2059.3
YGL091C	NBP35	TFIID		96758.2	50928					2059.3
YGL092W	NUP145	TFIID	TATA-less
YGL093W	SPC105	TFIID	TATA-less	111813	63714.2	36160.2
YGL094C	PAN2	TFIID	TATA-less	111813	63714.2	36160.2
YGL095C	VPS45	TFIID	TATA-less	62154.1	38636.2		7091.7			3303.7
YGL096W	TOS8	CR						7346.4	4579.2	7845.8
YGL097W	SRM1	TFIID	TATA-less
YGL098W	USE1	TFIID	TATA-containing
YGL099W	LSG1	TFIID	TATA-less
YGL100W	SEH1	TFIID	TATA-less	48200.9	27451.9
YGL101W	YGL101W	TFIID	TATA-containing
YGL103W	RPL28	TFIID	TATA-less				11493.7		2303.1	4382
YGL104C				87703.6
YGL105W	ARC1	TFIID	TATA-less	78321.4	48171.8	25421.8	9949.4			5195.6
YGL106W	MLC1	TFIID	TATA-less	91307.1	60461.6	22583.4	8896.1			3955.1
YGL107C	RMD9	TFIID	TATA-less	91307.1	60461.6	22583.4	8896.1			3955.1
YGL108C	YGL108C	TFIID	TATA-containing	57215.6	28836
YGL110C	CUE3	TFIID	TATA-less	99930.1	47955.2	26762.3	6011.3
YGL111W	NSA1	TFIID	TATA-less
YGL112C	TAF6	TFIID
YGL113W	SLD3	TFIID	TATA-less
YGL114W	YGL114W	CR	TATA-less	74283.9	34981.6		5106.1			1623
YGL115W	SNF4	TFIID	TATA-less	100232	76532.4	34607.8	10416.7			2833.5
YGL116W	CDC20	CR	TATA-less
YGL117W	YGL117W	CR	TATA-containing				4069.2		1949.8	7120.3
YGL119W	COQ8	TFIID	TATA-less	103526	49339.1		9292.8
YGL120C	PRP43	TFIID	TATA-less	96900.1			9526.3
YGL121C				105595			11341.7		2894.3	5441.6
YGL122C	NAB2	TFIID	TATA-less	177964	142843	143408	45907.4			8463.2
YGL123W	RPS2	TFIID	TATA-containing			68122.4	28160.9	11486.1	7685.4	14259.4
YGL124C	MON1	TFIID			86951.2				7685.4
YGL125W	MET13	CR				25969.9	6028.9	15525.5	7189.2	11665.6
YGL126W				61606.8	39705.9	27855.9	8745.8		2339.6	7985.2
YGL127C	SOH1	TFIID	TATA-less	62367.2	39705.9	27885.3	8745.8		2339.6	7985.2
YGL128C	CWC23	TFIID		89858.2	56953	23283.8
YGL129C	RSM23	TFIID	TATA-containing	135050	106842	62574.4	13448			4212.2
YGL130W	CEG1	TFIID	TATA-less	88098.9	45795.9	28252.5
YGL131C	SNT2	TFIID	TATA-containing	88098.9	45795.9	28336.5
YGL133W	ITC1	TFIID	TATA-less	49039.5	29354.5	18305.9
YGL134W	PCL10	TFIID	TATA-less
YGL135W	RPL1B	TFIID	TATA-less				6805.6			1773.8
YGL136C	MRM2	TFIID	TATA-less	53798.3	27793.8	16627.4
YGL137W	SEC27	TFIID	TATA-less	114565	93892.1	37178.2
YGL138C				114565	93892.1	37178.2
YGL139W	FLC3	TFIID	TATA-less	150301	85028.3	41246.9	13211.6			2741.8
YGL140C	YGL140C	TFIID	TATA-less	150301	85028.3	41246.9	13211.6			2741.8
YGL141W	HUL5	TFIID		92558.2	46214.9	24288.8	4718.8
YGL142C	GPI10	TFIID		92558.2	46214.9	24288.8	4710.6
YGL143C	MRF1	TFIID	TATA-less	99168.2	42940.6	24342.8
YGL144C	ROG1	TFIID	TATA-less	63676.8	38422.1
YGL145W	TIP20	TFIID	TATA-containing
YGL146C				75861.3	54202.5	28584
YGL147C	RPL9A	TFIID					4668.7			2431.3
YGL148W	ARO2	TFIID	TATA-less	81883.2	36400	24417.9	8625.2			5574.3
YGL150C	INO80	TFIID	TATA-less		26022.8		8403.4			3156.3
YGL151W	NUT1	TFIID	TATA-less	183652	133554	47656.5	13232.4
YGL153W	PEX14	TFIID		47312.1	27352
YGL154C	LYS5	TFIID	TATA-less	47312.1	27350.5
YGL155W	CDC43	TFIID		78903	46883.2
YGL156W										4452.2
YGL157W	ARI1	CR	TATA-containing							4801.6
YGL158W									3141.2
YGL159W	YGL159W	TFIID	TATA-less	40353.8	18717.7
YGL160W	AIM14	TFIID		108082	66767.3	24023.2	8713.9		1233.3	4006.7
YGL161C	YIP5	TFIID	TATA-less	108082	66767.3	24033.6	8720.9		1233.3	4006.7
YGL162W	SUT1	TFIID	TATA-containing	51522	29319.8	23743.6	7205.8	5663.2	2442	5569.8
YGL163C	RAD54	TFIID	TATA-less	56440.1	36751.1		4732.4			2238.2
YGL164C	YRB30	TFIID	TATA-less	68992.9	34298.1
YGL166W	CUP2	TFIID	TATA-less	78204.6	41268.7		25036.3	11612.5	11329	31067.1
YGL167C	PMR1	TFIID	TATA-less	78204.6	41680.4	66084.3	25036.3	11612.5	11329	31067.1
YGL168W
YGL169W	SUA5	TFIID	TATA-less
YGL170C
YGL171W	ROK1	TFIID	TATA-less
YGL172W	NUP49	TFIID	TATA-less	161175	131601	59413	20565.6		1829.8	7939
YGL173C	XRN1	TFIID	TATA-less	161175	131601	59413	20565.6		1829.8	7939
YGL174W	BUD13	TFIID		47449.1	23715
YGL175C	SAE2	TFIID		47449.1	23715
YGL176C	YGL176C	TFIID	TATA-less	44621.4	27251.8
YGL178W	MPT5	TFIID	TATA-less	53763.5		47207.7	13469.6	9573.2	4628.1	11324.6
YGL179C				75401.5		50703.5	10314.5	8801.5	3695.4	5653.1
YGL180W	ATG1	TFIID								4007.6
YGL181W	GTS1	TFIID	TATA-less	86110.2	55182.1	36937.4	14485.5		2297.5	18918.4
YGL183C					55182.1				2297.5
YGL184C	STR3	CR						4776.8	1906.4	3353
YGL185C	YGL185C	TFIID	TATA-less	70120.8	35759.7
YGL186C	TPN1	TFIID	TATA-containing	96783.5	43868.2	30043.5	7613		2158.5	4767.8
YGL187C	COX4	TFIID	TATA-less	81891	46674.7	49029.9	6324.1			3838.8
YGL188C-A	YGL188C-A	TFIID				31980.9	13541.1		3144.4	17597.1
YGL189C	RPS26A	TFIID	TATA-less
YGL190C	CDC55	TFIID		132519	95680.1	105822	34535	6323.3	3271.6	15041.7
YGL191W	COX13	TFIID	TATA-less	95469.6	58856.8	30848.8	14428.8		2141.5	7163.1
YGL192W							5557.6			1259.8
YGL193C
[truncated: 3,889 more rows]

## Sheet: 4B
gene_id	gene_name	class	TATA	Bdf1	Bdf2	H4K12ac
YAL001C	TFC3	TFIID		9942.8	3401.4	4.05079
YAL002W	VPS8	TFIID	TATA-less			1.76795
YAL003W	EFB1	CR	TATA-less			1.75601
YAL005C	SSA1	CR	TATA-containing			1.34672
YAL007C	ERP2	TFIID	TATA-less	11913.5	3107.4	3.37418
YAL008W	FUN14	TFIID	TATA-less			3.61747
YAL009W	SPO7	TFIID		10742.8	3451.1	4.38872
YAL010C	MDM10	TFIID	TATA-less	10742.8	3451.1	3.62141
YAL011W	SWC3	TFIID	TATA-less			5.45296
YAL012W	CYS3	CR	TATA-less			1.65769
YAL013W	DEP1	TFIID	TATA-less			3.84267
YAL014C	SYN8	TFIID	TATA-less			4.87216
YAL015C	NTG1	TFIID				2.65954
YAL016W	TPD3	TFIID		19196.9	4200.5	4.41032
YAL017W	PSK1	TFIID		8996.2	2684.8	1.42453
YAL018C
YAL019W	FUN30	TFIID	TATA-less			4.13977
YAL020C				12507.5	3323.8
YAL021C	CCR4	TFIID	TATA-less	16258.9	4026.7	6.87411
YAL022C	FUN26	TFIID	TATA-less			4.56773
YAL023C	PMT2	TFIID	TATA-less	13174.9	3260	4.704
YAL024C	LTE1	TFIID	TATA-less			2.33245
YAL025C	MAK16	TFIID	TATA-less	10904.9	2558.9	3.07236
YAL026C	DRS2	TFIID	TATA-less	35637.9	3705.7	3.15367
YAL027W	SAW1	TFIID	TATA-containing	8145.1	1962.1	3.64418
YAL028W	FRT2	TFIID	TATA-less			1.73795
YAL029C	MYO4	TFIID	TATA-less	7891.5	2337.2	2.08445
YAL030W	SNC1	TFIID		12315.7	2792.3	2.43926
YAL031C	GIP4	TFIID	TATA-less	12919.9	2724.3	2.52469
YAL032C	PRP45	TFIID	TATA-less	11144	3044.6	4.22492
YAL033W	POP5	TFIID		17822.1	2960.4	4.57413
YAL034C	FUN19	TFIID				2.12797
YAL034W-A	MTW1	TFIID	TATA-less			3.63528
YAL035W	FUN12	TFIID	TATA-less	19424.6	4176.1	5.20991
YAL036C	RBG1	TFIID	TATA-less			4.90234
YAL037C-A
YAL037W
YAL038W	CDC19	CR	TATA-less			1.35189
YAL039C	CYC3	TFIID	TATA-less			2.43727
YAL040C	CLN3	CR	TATA-less			2.53003
YAL041W	CDC24	TFIID	TATA-less	22332.4	3476.6	6.0686
YAL042W	ERV46	TFIID	TATA-less	18446.1	4226.2	5.88761
YAL043C	PTA1	TFIID	TATA-less			4.86381
YAL044C	GCV3	TFIID	TATA-containing			6.1281
YAL044W-A	YAL044W-A	TFIID		8634.7	2917.5	6.17173
YAL046C	AIM1	TFIID	TATA-containing	8932	2912.6	7.01729
YAL047C	SPC72	TFIID	TATA-containing	12431.8	2984	4.1431
YAL048C	GEM1	TFIID				3.59928
YAL049C	AIM2	TFIID	TATA-less			2.5877
YAL051W	OAF1	TFIID	TATA-less			2.56295
YAL053W	FLC2	TFIID	TATA-less			2.09759
YAL054C
YAL055W
YAL056W	GPB2	TFIID	TATA-less	10294.8	2886	3.61294
YAL058W	CNE1	TFIID	TATA-less			3.98917
YAL059W	ECM1	TFIID				2.74657
YAL060W	BDH1	CR	TATA-containing			3.66615
YAL061W
YAL062W
YAL063C
YAL063C-A
YAL064C-A
YAL064W
YAL064W-B
YAL065C
YAL067C
YAL067W-A
YAL068C
YAR002C-A	ERP1	TFIID	TATA-less	11912.8	2357.3	4.12302
YAR002W	NUP60	TFIID	TATA-less	10989.4	2834.1	3.78968
YAR003W	SWD1	TFIID	TATA-containing			3.88983
YAR007C	RFA1	TFIID	TATA-less	12541.4	3455.5	2.8577
YAR008W	SEN34	TFIID				3.55536
YAR009C
YAR010C
YAR014C	BUD14	TFIID	TATA-less	11620.6	3433.4	4.06359
YAR015W	ADE1	TFIID	TATA-containing			3.78167
YAR018C	KIN3	TFIID	TATA-less			3.30119
YAR019C	CDC15	TFIID	TATA-less	10633.6	3511	5.34563
YAR020C
YAR023C
YAR027W	UIP3	TFIID				3.18326
YAR028W	YAR028W	TFIID	TATA-less			3.969
YAR029W
YAR031W
YAR033W
YAR035C-A
YAR035W
YAR042W	SWH1	TFIID	TATA-less			2.73183
YAR050W
YAR064W
YAR066W
YAR068W
YAR071W
YBL001C	ECM15	TFIID				4.71251
YBL002W	HTB2	CR	TATA-containing			3.99655
YBL003C	HTA2	CR	TATA-containing			4.87548
YBL004W	UTP20	TFIID	TATA-less			3.09822
YBL005W	PDR3	TFIID	TATA-less			3.09024
YBL005W-A
YBL005W-B
YBL006C	LDB7	TFIID	TATA-less	17840.3	4035.9	6.82932
YBL007C	SLA1	TFIID	TATA-less	13554.6	3812.3	5.32378
YBL008W	HIR1	TFIID	TATA-less	9552.8	3084.9	3.66087
YBL008W-A
YBL009W	ALK2	TFIID	TATA-less			2.61267
YBL010C	YBL010C	TFIID	TATA-less	9812.6	2574.5	2.32554
YBL011W	SCT1	TFIID	TATA-less			2.55294
YBL013W	FMT1	TFIID	TATA-less			2.34115
YBL014C	RRN6	TFIID	TATA-less			3.27032
YBL015W	ACH1	TFIID	TATA-containing			3.0263
YBL016W	FUS3	TFIID	TATA-containing			3.55248
YBL017C	PEP1	TFIID	TATA-less			3.14128
YBL018C	POP8	TFIID	TATA-less	9401	2905.1	3.27851
YBL019W	APN2	TFIID				2.96289
YBL020W	RFT1	TFIID	TATA-less			5.0503
YBL021C	HAP3	TFIID	TATA-less	12505.6	3125	5.54472
YBL022C	PIM1	TFIID		28812.6	3224.1	5.82111
YBL023C	MCM2	TFIID				2.95812
YBL024W	NCL1	TFIID	TATA-less			2.05179
YBL025W	RRN10	TFIID	TATA-less			2.10522
YBL026W	LSM2	TFIID	TATA-less			3.59048
YBL027W	RPL19B	TFIID	TATA-less	15038.9	3702.5	2.72196
YBL028C	YBL028C	TFIID	TATA-less			2.5216
YBL029C-A	YBL029C-A	TFIID	TATA-containing			2.9226
YBL029W
YBL030C	PET9	CR	TATA-containing			1.81318
YBL031W	SHE1	TFIID	TATA-less			2.11359
YBL032W	HEK2	TFIID	TATA-less			3.2607
YBL033C	RIB1	CR	TATA-containing			3.53024
YBL034C	STU1	TFIID	TATA-less			1.94764
YBL035C	POL12	TFIID	TATA-containing			1.39285
YBL036C	YBL036C	TFIID	TATA-less	8752.3	2803.5	2.20776
YBL037W	APL3	TFIID	TATA-less			3.37866
YBL038W	MRPL16	TFIID	TATA-less	10863.8	3021.9	4.35038
YBL039C	URA7	TFIID	TATA-less	9003.6	2101.9	2.82446
YBL039W-B	YBL039W-B	TFIID	TATA-less			2.26565
YBL040C	ERD2	TFIID	TATA-less	9897.3	3374.1	4.01199
YBL041W	PRE7	TFIID	TATA-less	15256.4	3830.1	4.67435
YBL042C	FUI1	TFIID	TATA-less			2.01313
YBL043W
YBL044W
YBL045C	COR1	TFIID	TATA-less	8384.9	2577.3	1.97764
YBL046W	PSY4	TFIID	TATA-less			2.21459
YBL047C	EDE1	TFIID	TATA-less	13391.4	2722.6	2.3449
YBL049W
YBL050W	SEC17	TFIID	TATA-less	12424.8	3106.8	3.51668
YBL051C	PIN4	TFIID	TATA-less			2.89157
YBL052C	SAS3	TFIID		10580.8	2805.5	3.06345
YBL054W	TOD6	TFIID	TATA-less			2.60385
YBL055C	YBL055C	TFIID	TATA-less			3.66679
YBL056W	PTC3	TFIID	TATA-less	15893.5	2738.3	4.66162
YBL057C	PTH2	TFIID	TATA-less			4.03634
YBL058W	SHP1	TFIID	TATA-containing			3.83224
YBL059C-A	CMC2	TFIID				3.61386
YBL059W	YBL059W	TFIID	TATA-less			3.28436
YBL060W	YEL1	TFIID				3.22975
YBL061C	SKT5	TFIID	TATA-less			3.11767
YBL063W	KIP1	TFIID	TATA-less	9701.8	3031.1	3.90471
YBL064C	PRX1	CR	TATA-containing			1.72709
YBL066C	SEF1	TFIID				1.34271
YBL067C	UBP13	TFIID	TATA-less			1.75553
YBL068W	PRS4	TFIID	TATA-less			3.34625
YBL069W	AST1	TFIID	TATA-containing			1.86003
YBL071C-B				19495.1	3639.6
YBL071W-A				3029	2087.5
YBL072C	RPS8A	TFIID	TATA-less			1.77056
YBL074C	AAR2	TFIID	TATA-less			3.61693
YBL075C	SSA3	TFIID				1.13395
YBL076C	ILS1	TFIID	TATA-less	11538	2806.6	3.88882
YBL078C	ATG8	TFIID	TATA-less			1.12522
YBL079W	NUP170	TFIID	TATA-less	12456.6	2509	3.43148
YBL080C	PET112	TFIID	TATA-less	12019.7	2818.5	4.19396
YBL081W	YBL081W	TFIID	TATA-less	10881.3	2565.7	2.98149
YBL082C	ALG3	TFIID	TATA-less			2.89586
YBL084C	CDC27	TFIID	TATA-less	10003.7	2776.5	2.20605
YBL085W	BOI1	TFIID	TATA-less	9246.3	2987.7	2.82024
YBL086C	YBL086C	TFIID				1.31392
YBL087C	RPL23A	TFIID	TATA-less	9293.2	3329.3	2.72682
YBL088C	TEL1	TFIID	TATA-containing			2.7828
YBL089W	AVT5	TFIID		14061.5	3120	5.67557
YBL090W	MRP21	TFIID	TATA-less			3.27881
YBL091C	MAP2	TFIID				2.67378
YBL091C-A	SCS22	TFIID	TATA-containing			4.35704
YBL092W	RPL32	TFIID	TATA-less	16929.1	3494.9	3.12641
YBL093C	ROX3	TFIID	TATA-less			3.26403
YBL095W	YBL095W	TFIID	TATA-containing			1.59424
YBL097W	BRN1	TFIID	TATA-less			2.43285
YBL098W
YBL099W	ATP1	TFIID	TATA-less			2.21
YBL100W-A
YBL100W-B
YBL100W-C
YBL101C	ECM21	TFIID				3.12527
YBL102W	SFT2	TFIID	TATA-less	11319	2898.2	4.44209
YBL103C	RTG3	TFIID	TATA-less			2.6753
YBL104C	SEA4	TFIID	TATA-less	9217	2540	2.83664
YBL105C	PKC1	TFIID	TATA-less	15476.3	2919.4	2.42371
YBL106C	SRO77	CR				0.976075
YBL107C	MIX23	TFIID	TATA-less			2.99892
YBL108C-A
YBL111C
YBL112C
YBL113C
YBR001C	NTH2	CR	TATA-containing			1.05538
YBR002C	RER2	TFIID	TATA-less	14139.6	3518.6	4.51945
YBR003W	COQ1	TFIID	TATA-less			3.71367
YBR004C	GPI18	TFIID				2.47746
YBR005W	RCR1	TFIID	TATA-less			2.46055
YBR006W	UGA2	TFIID				1.96401
YBR007C	DSF2	CR	TATA-less			2.19703
YBR008C	FLR1	CR	TATA-less			1.99156
YBR009C	HHF1	CR	TATA-containing			7.09256
YBR010W	HHT1	CR	TATA-containing			7.90464
YBR011C	IPP1	TFIID	TATA-less	12815.3	3229.4	4.24108
YBR012W-A
YBR012W-B
YBR013C				10712.3	2672.7
YBR014C	GRX7	TFIID	TATA-less			1.93658
YBR015C	MNN2	TFIID	TATA-less			4.24566
YBR016W	YBR016W	TFIID	TATA-containing			5.69555
YBR017C	KAP104	TFIID	TATA-less	12312.8	3280.2	2.85634
YBR018C
YBR019C
YBR020W
YBR021W
YBR022W	POA1	TFIID	TATA-less			5.17298
YBR023C	CHS3	TFIID	TATA-less			3.27604
YBR024W	SCO2	TFIID	TATA-less			1.9392
YBR025C	OLA1	TFIID	TATA-less	13657.5	3031.1	6.41664
YBR026C	ETR1	TFIID	TATA-less			3.31798
YBR028C	YPK3	TFIID	TATA-less			2.4642
YBR029C	CDS1	TFIID	TATA-less	16142.9	2867	5.41621
YBR030W	RKM3	TFIID	TATA-less			4.57015
YBR031W	RPL4A	TFIID	TATA-containing	13353.1	3680.6	4.93903
YBR033W
YBR034C	HMT1	TFIID	TATA-containing	8933.5	2520.4	2.93047
YBR035C	PDX3	TFIID	TATA-less			3.89195
YBR036C	CSG2	TFIID	TATA-less	15183	2988.5	3.84318
YBR037C	SCO1	TFIID	TATA-less			3.40107
YBR038W	CHS2	TFIID	TATA-less			3.30127
YBR039W	ATP3	TFIID	TATA-less	10099.7	2732.6	2.24718
YBR040W
YBR041W	FAT1	TFIID				2.29786
YBR042C	CST26	TFIID	TATA-less	7848.6	2307.1	2.67467
YBR043C	QDR3	TFIID	TATA-less			2.61368
YBR044C	TCM62	TFIID				3.00972
YBR045C
YBR046C	ZTA1	CR	TATA-less			2.01268
YBR047W	FMP23	TFIID				1.73857
YBR048W	RPS11B	CR	TATA-less	11961.1	3333.5	2.59293
YBR049C	REB1	TFIID	TATA-less	15515.8	3235.2	3.58383
YBR050C
YBR052C	RFS1	TFIID	TATA-less			2.39478
YBR053C	YBR053C	TFIID	TATA-less			2.3719
YBR054W	YRO2	CR	TATA-containing			0.849135
YBR055C	PRP6	TFIID	TATA-less	9352.9	2226.2	4.10848
YBR056W	YBR056W	TFIID	TATA-less			1.63771
YBR056W-A	YBR056W-A	CR	TATA-less	6340.2	2679.8	3.7831
YBR057C	MUM2	TFIID	TATA-less	11363.7	2514.3	3.03456
YBR058C	UBP14	TFIID		9578.1	2799.3	3.5738
YBR058C-A	TSC3	TFIID	TATA-less	14455.8	2954.6	3.46099
YBR059C	AKL1	TFIID	TATA-less	11344.1	2893.9	3.43333
YBR060C	ORC2	TFIID	TATA-less			1.97579
YBR061C	TRM7	TFIID	TATA-less	10389.7	3016.4	4.13778
YBR062C	YBR062C	TFIID	TATA-less			3.55459
YBR063C	YBR063C	TFIID				0.44829
YBR065C	ECM2	TFIID	TATA-less			1.64738
YBR066C	NRG2	CR	TATA-containing			2.2328
YBR067C	TIP1	TFIID	TATA-containing			2.38349
YBR068C	BAP2	CR	TATA-containing			1.25425
YBR069C	TAT1	CR	TATA-containing			2.11985
YBR070C	ALG14	TFIID	TATA-less			1.99821
YBR071W	YBR071W	CR	TATA-less			2.23088
YBR072C-A
YBR072W
YBR073W	RDH54	TFIID	TATA-containing			1.24523
YBR074W	PFF1	TFIID	TATA-less			1.81993
YBR076W
YBR077C	SLM4	TFIID	TATA-less	10406.3	2730.1	2.51753
YBR078W	ECM33	CR	TATA-less			1.56727
YBR079C	RPG1	TFIID	TATA-less	20753.3	3028.8	4.75908
YBR080C	SEC18	TFIID	TATA-less			3.52472
YBR081C
YBR082C	UBC4	TFIID	TATA-less			2.16403
YBR083W	TEC1	CR	TATA-containing			2.08606
YBR084C-A	RPL19A	TFIID	TATA-less	15554.1	3548.4	3.18677
YBR084W	MIS1	TFIID	TATA-less			3.30719
YBR085C-A	YBR085C-A	CR	TATA-containing			2.87006
YBR085W	AAC3	TFIID	TATA-less			2.16618
YBR086C	IST2	TFIID	TATA-less			1.41379
YBR087W	RFC5	TFIID	TATA-less			4.22104
YBR088C	POL30	CR	TATA-containing			1.61177
YBR089C-A	NHP6B	TFIID				3.05594
YBR090C
YBR091C	TIM12	TFIID	TATA-less	11248	2915.4	3.7529
YBR092C	PHO3	CR	TATA-containing			2.52567
YBR093C	PHO5	TFIID	TATA-containing			2.57042
YBR094W	PBY1	TFIID				1.67578
YBR095C	RXT2	TFIID	TATA-less	14393.2	2777.6	2.87546
YBR096W	YBR096W	TFIID	TATA-less			2.20912
YBR097W	VPS15	TFIID	TATA-less			1.90603
YBR098W	MMS4	TFIID				2.54063
YBR101C	FES1	TFIID	TATA-less			2.413
YBR102C	EXO84	TFIID	TATA-less			2.37011
YBR103W	SIF2	TFIID	TATA-less	7516	1619	2.24889
YBR104W	YMC2	TFIID	TATA-less			2.51456
YBR105C	VID24	TFIID	TATA-containing			2.72099
YBR106W	PHO88	TFIID	TATA-containing			4.54828
YBR107C	IML3	TFIID	TATA-less			3.22205
YBR108W	AIM3	TFIID	TATA-less			2.58702
YBR109C	CMD1	TFIID	TATA-less	10032.2	3059.9	3.16084
YBR110W	ALG1	TFIID	TATA-less	10564.3	2769.1	5.45747
YBR111C	YSA1	TFIID	TATA-containing			3.71034
YBR111W-A	SUS1	TFIID	TATA-less			3.29218
YBR112C	CYC8	TFIID	TATA-less			2.40521
YBR114W	RAD16	TFIID	TATA-containing			1.92922
YBR115C
YBR117C
YBR118W	TEF2	CR	TATA-containing			1.72321
YBR119W	MUD1	TFIID	TATA-less			2.2284
YBR120C	CBP6	TFIID	TATA-less			3.57755
YBR121C	GRS1	TFIID	TATA-less			3.54867
YBR122C	MRPL36	TFIID	TATA-less	15854.9	3291.5	3.00373
YBR123C	TFC1	TFIID	TATA-less			3.29568
YBR125C	PTC4	TFIID	TATA-containing			2.38461
YBR126C	TPS1	CR	TATA-containing	12489.9	3128.4	5.38521
YBR126W-A
YBR127C	VMA2	TFIID	TATA-less			2.87348
YBR128C	ATG14	TFIID				1.67356
YBR129C	OPY1	TFIID		11734.3	3420.1	4.02532
YBR130C	SHE3	TFIID		15392.3	2894.2	3.38146
YBR131W	CCZ1	TFIID	TATA-less			2.58549
YBR132C	AGP2	CR	TATA-containing			2.02413
YBR133C	HSL7	TFIID	TATA-less			4.13876
YBR135W	CKS1	TFIID	TATA-containing	13362.3	3668.2	5.30477
YBR136W	MEC1	TFIID	TATA-less			1.61189
YBR137W	YBR137W	TFIID	TATA-less			3.06111
YBR138C	YBR138C	TFIID	TATA-less			1.95018
YBR139W	YBR139W	CR	TATA-containing			1.70437
YBR140C	IRA1	TFIID				1.43074
YBR141C	BMT2	TFIID				2.91155
YBR142W	MAK5	TFIID	TATA-less			2.59891
YBR143C	SUP45	TFIID	TATA-less	15644.3	3214	2.80794
YBR145W	ADH5	CR	TATA-containing			2.61815
YBR146W	MRPS9	TFIID	TATA-less	17113.1	3190.8	3.21148
YBR147W
YBR148W
YBR149W	ARA1	CR	TATA-containing			3.38824
YBR150C	TBS1	TFIID	TATA-less			2.37551
YBR151W	APD1	TFIID	TATA-less			2.73489
YBR152W	SPP381	TFIID	TATA-less			2.35845
YBR153W	RIB7	TFIID	TATA-less			3.37946
YBR154C	RPB5	TFIID	TATA-less	11051.8	2833.6	2.94222
YBR155W	CNS1	TFIID				2.29719
YBR156C	SLI15	TFIID	TATA-less			2.08973
YBR157C	ICS2	CR	TATA-containing			2.10445
YBR158W	AMN1	CR	TATA-containing			0.96869
YBR159W	IFA38	TFIID	TATA-less			3.3213
YBR160W	CDC28	TFIID	TATA-less	8881.4	2023.1	2.25276
YBR161W	CSH1	TFIID	TATA-less			2.5179
YBR162C	TOS1	CR	TATA-less			1.57776
YBR162W-A	YSY6	TFIID	TATA-less	5361.3	2226.1	5.30133
YBR163W	EXO5	TFIID	TATA-less			3.51323
YBR164C	ARL1	TFIID	TATA-containing			1.74778
YBR165W	UBS1	TFIID	TATA-less	10824.2	2136.7	2.23447
YBR166C	TYR1	TFIID				3.01271
YBR167C	POP7	TFIID				4.26577
YBR168W	PEX32	TFIID	TATA-less			2.99657
YBR169C	SSE2	TFIID				1.45544
YBR170C	NPL4	TFIID		10644.8	2669.6	3.04904
YBR171W	SEC66	TFIID				1.94867
YBR172C	SMY2	TFIID	TATA-less	12226.5	2324.2	3.80303
YBR173C	UMP1	TFIID	TATA-less	17219.5	3268.4	5.45874
YBR175W	SWD3	TFIID	TATA-less			4.84495
YBR176W	ECM31	TFIID	TATA-less			2.09524
YBR177C	EHT1	CR				1.71874
YBR179C	FZO1	TFIID	TATA-less			3.04966
YBR180W
YBR181C	RPS6B	TFIID	TATA-less	16374.1	3816.3	3.88439
YBR182C
YBR182C-A
YBR183W
YBR184W
YBR185C	MBA1	TFIID	TATA-less			2.58923
YBR186W
YBR187W	GDT1	TFIID	TATA-less			3.04953
YBR188C	NTC20	TFIID				3.86173
YBR189W	RPS9B	TFIID	TATA-less	17483.1	3295.2	3.07035
YBR191W	RPL21A	TFIID	TATA-less	18031.5	3924.1	3.79215
YBR192W	RIM2	TFIID	TATA-less			2.66118
YBR193C	MED8	TFIID	TATA-less			3.72061
YBR194W	AIM4	TFIID				2.81745
YBR195C	MSI1	TFIID	TATA-less	8679.8	2172.6	3.06138
YBR196C	PGI1	CR	TATA-containing			1.84698
YBR196C-A
YBR196C-B
YBR197C	YBR197C	TFIID	TATA-less			4.3733
YBR198C	TAF5	TFIID	TATA-less			2.71821
YBR199W	KTR4	TFIID	TATA-less	11146	2938.4	2.81267
YBR200W	BEM1	TFIID	TATA-less			2.40685
YBR200W-A
YBR201C-A	YBR201C-A	TFIID	TATA-containing			1.67517
YBR201W	DER1	TFIID	TATA-less			1.8116
YBR202W	MCM7	TFIID	TATA-less			3.41213
YBR203W
YBR204C	LDH1	TFIID		11760.1	2810	2.67245
YBR205W	KTR3	TFIID	TATA-less	11760.1	2810	4.11236
YBR207W	FTH1	TFIID	TATA-less	9098.6	2563.1	3.48018
YBR208C	DUR1,2	TFIID	TATA-less			1.62657
YBR210W	ERV15	TFIID	TATA-less			4.9983
YBR211C	AME1	TFIID	TATA-less	12376.7	2909.6	3.20632
YBR212W	NGR1	TFIID	TATA-less			1.65461
YBR213W	MET8	TFIID				1.63335
YBR214W	SDS24	TFIID	TATA-less			2.64233
YBR215W	HPC2	TFIID	TATA-less			2.67343
YBR216C	YBP1	TFIID		9039.4	2747.6	3.30366
YBR217W	ATG12	TFIID	TATA-less			3.16222
YBR218C	PYC2	CR	TATA-less			3.71194
YBR219C
YBR220C	YBR220C	TFIID	TATA-less			3.08926
YBR221C	PDB1	TFIID	TATA-less	8891.5	2934.2	3.0851
YBR221W-A				3809	2355
YBR222C	PCS60	TFIID	TATA-containing			2.15742
YBR223C	TDP1	TFIID				3.57993
YBR225W	YBR225W	TFIID				2.5662
YBR227C	MCX1	TFIID				2.68016
YBR228W	SLX1	TFIID	TATA-less	7868.7	2844.7	2.66373
YBR229C	ROT2	TFIID	TATA-less	12435.9	2934.3	3.56393
YBR230C	OM14	CR	TATA-containing			4.16764
YBR230W-A
YBR231C	SWC5	TFIID	TATA-less			3.0467
YBR233W	PBP2	TFIID		8433.3	3029.2	3.66902
YBR233W-A	DAD3	TFIID	TATA-less			2.75478
YBR234C	ARC40	TFIID	TATA-less	9268	3144.8	2.49849
YBR235W	VHC1	TFIID				2.9043
YBR236C	ABD1	TFIID	TATA-less			2.40762
YBR237W	PRP5	TFIID	TATA-less			2.26165
YBR238C	YBR238C	TFIID	TATA-less			4.01578
YBR239C	ERT1	TFIID		8447.4	2445.8	2.25447
YBR240C
YBR241C
YBR242W	YBR242W	TFIID	TATA-containing			1.75774
YBR243C	ALG7	CR	TATA-less			3.19713
YBR244W	GPX2	CR	TATA-containing			2.83787
YBR245C	ISW1	TFIID				2.80125
YBR246W	RRT2	TFIID	TATA-less	9942.2	2413.1	2.98684
YBR247C	ENP1	TFIID	TATA-less			2.3545
YBR248C	HIS7	TFIID	TATA-less			2.28188
YBR249C	ARO4	CR	TATA-less			3.47381
YBR250W
YBR251W	MRPS5	TFIID	TATA-less			2.637
YBR252W	DUT1	TFIID	TATA-containing			4.71434
YBR253W	SRB6	TFIID		12290.2	2956.9	3.98062
YBR254C	TRS20	TFIID				2.72408
YBR255C-A	YBR255C-A	TFIID	TATA-less	16008.2	3488.1	5.39859
YBR255W	MTC4	TFIID				2.33927
YBR256C	RIB5	CR	TATA-containing			3.71507
YBR257W	POP4	TFIID	TATA-less			1.52839
YBR258C	SHG1	TFIID	TATA-less			1.87857
YBR259W	YBR259W	TFIID				2.4922
YBR260C	RGD1	TFIID				3.72348
YBR261C	TAE1	TFIID	TATA-less			4.8673
YBR262C	MIC12	TFIID	TATA-less	11150.7	3025.3	5.36486
YBR263W	SHM1	TFIID				4.50606
YBR264C	YPT10	TFIID	TATA-less	11826	2577.7	4.45334
YBR265W	TSC10	TFIID	TATA-less	11826	2577.7	3.29141
YBR267W	REI1	TFIID	TATA-less	13378.8	3090.4	4.62314
YBR268W	MRPL37	TFIID	TATA-less	11745.1	4107	6.40801
YBR269C	SDH8	TFIID	TATA-less			3.65213
YBR270C
YBR271W	EFM2	TFIID	TATA-less			3.36123
YBR272C	HSM3	TFIID	TATA-containing	6899	1570.3	3.01242
YBR273C	UBX7	TFIID		8922.2	2423.7	3.64404
YBR274W	CHK1	TFIID				3.25027
YBR275C	RIF1	TFIID	TATA-less			2.52795
YBR276C	PPS1	TFIID		8937.9	2186.9	2.84521
YBR278W	DPB3	TFIID		8702.2	2394.8	3.12818
YBR279W	PAF1	TFIID	TATA-less	9199.5	2668	2.11517
YBR280C	SAF1	TFIID				2.37837
YBR281C	DUG2	TFIID	TATA-less			2.33825
YBR282W	MRPL27	TFIID	TATA-less	7149.6	2209	2.23068
YBR283C	SSH1	TFIID	TATA-less	11888.3	2700.7	3.1475
YBR284W
YBR285W
YBR286W	APE3	CR	TATA-containing			2.28065
YBR287W	YBR287W	TFIID	TATA-containing			2.29617
YBR288C	APM3	TFIID		11465.1	2445.8	2.64169
YBR289W	SNF5	TFIID	TATA-less	11205.5	2396	2.263
YBR290W	BSD2	TFIID	TATA-containing	9725.5	2732.9	4.25496
YBR291C
YBR293W	VBA2	TFIID	TATA-less			5.96115
YBR294W
YBR295W	PCA1	TFIID	TATA-containing			2.48531
YBR296C	PHO89	CR	TATA-containing			0.827665
YBR296C-A
YBR297W
YBR298C	MAL31	CR	TATA-containing			1.73591
YBR298C-A
YBR299W
YBR301W
YBR302C
YCL001W	RER1	TFIID	TATA-less	10881.4	3042.1	5.26192
YCL001W-A
YCL001W-B
YCL002C	YCL002C	TFIID				3.20042
YCL004W	PGS1	TFIID				3.51181
YCL005W	LDB16	TFIID	TATA-containing			5.92028
YCL005W-A	VMA9	TFIID		9326.9	3155	4.93438
YCL008C	STP22	TFIID	TATA-less			6.37312
YCL009C	ILV6	TFIID	TATA-less	14406.7	4124	6.66599
YCL010C	SGF29	TFIID	TATA-less			3.78109
YCL011C	GBP2	TFIID	TATA-less			4.04366
YCL012C	YCL012C	TFIID				2.39993
YCL014W	BUD3	TFIID	TATA-less			3.52867
YCL016C	DCC1	TFIID	TATA-less			5.49259
YCL017C	NFS1	TFIID	TATA-less	10128.2	3068.7	2.8301
YCL018W
YCL019W
YCL020W
YCL021W-A	YCL021W-A	CR				1.64089
YCL024W	KCC4	TFIID	TATA-less			2.32654
YCL025C	AGP1	CR	TATA-containing			3.69647
YCL026C-A	FRM2	CR				1.66549
YCL026C-B	HBN1	CR				1.58117
YCL027W	FUS1	CR	TATA-less			3.68515
YCL028W	RNQ1	TFIID				4.30443
YCL029C	BIK1	TFIID	TATA-less			4.91205
YCL030C	HIS4	CR	TATA-containing			3.36633
YCL031C	RRP7	TFIID	TATA-less	24392.6	4987.3	4.92864
YCL032W	STE50	TFIID	TATA-less			5.50366
YCL033C
YCL034W	LSB5	TFIID	TATA-containing	14460.9	3277.1	4.54828
YCL035C	GRX1	TFIID	TATA-containing			3.20232
YCL036W
YCL037C	SRO9	TFIID	TATA-less	19032.4	3808.6	5.6776
YCL038C	ATG22	TFIID	TATA-less			2.44653
YCL039W	GID7	TFIID	TATA-less			2.44915
YCL040W	GLK1	CR	TATA-containing			2.94393
YCL042W
YCL043C	PDI1	CR	TATA-containing	15053.6	3387.8	4.68574
YCL044C	MGR1	TFIID	TATA-less	20522.6	3647.9	5.76891
YCL045C	EMC1	TFIID	TATA-containing	11712.1	2862.4	4.38575
YCL047C
YCL048W
YCL048W-A
YCL049C
YCL050C	APA1	TFIID	TATA-less			2.5383
YCL051W	LRE1	TFIID	TATA-less	13119.5	3078.8	3.19795
YCL052C	PBN1	TFIID		13024.9	3006.2	3.89114
YCL054W	SPB1	TFIID	TATA-less	14018.7	2786.2	2.98872
YCL054W-A
YCL055W	KAR4	CR	TATA-containing	10933.8	3106.5	4.20787
YCL056C	PEX34	TFIID	TATA-less			3.88868
YCL057C-A	MIC10	TFIID	TATA-less	15594.4	4290.8	5.78856
YCL057W	PRD1	TFIID	TATA-less	11642.7	3107.5	4.24864
YCL058C
YCL058W-A	ADF1	TFIID	TATA-less	6449	2337	4.62518
YCL059C	KRR1	TFIID	TATA-less			2.88447
YCL061C	MRC1	TFIID	TATA-less	9593.3	2461.9	2.99283
YCL063W	VAC17	TFIID	TATA-less			3.50059
YCL064C	CHA1	CR	TATA-containing			1.06785
YCL066W
YCL067C
YCL068C
YCL069W
YCL073C
YCR002C	CDC10	TFIID	TATA-less			3.60246
YCR003W	MRPL32	TFIID	TATA-less	12168	2793	2.72557
YCR004C	YCP4	TFIID	TATA-containing			2.57376
YCR005C	CIT2	CR	TATA-containing			1.66175
YCR007C
YCR008W	SAT4	TFIID	TATA-containing			1.69623
YCR009C	RVS161	TFIID	TATA-less			3.04454
YCR010C
YCR011C	ADP1	TFIID	TATA-less			2.74905
YCR012W	PGK1	CR	TATA-containing			2.32848
YCR014C	POL4	TFIID				0.904935
YCR015C	YCR015C	TFIID	TATA-less			4.6929
YCR016W	YCR016W	TFIID	TATA-less	12350.4	3041.5	2.12834
YCR017C	CWH43	TFIID	TATA-less	10243.6	2940.1	3.78765
YCR018C	SRD1	CR				1.80609
YCR019W	MAK32	TFIID	TATA-less			3.37024
YCR020C
YCR020C-A	MAK31	TFIID				2.88357
YCR020W-B	HTL1	TFIID				2.32233
YCR021C	HSP30	CR	TATA-containing			2.5529
YCR023C	YCR023C	TFIID	TATA-less	10449.7	2535.7	2.77984
YCR024C	SLM5	TFIID				1.27168
YCR024C-A	PMP1	CR	TATA-containing			0.90252
YCR024C-B	YCR024C-B	CR				0.99031
YCR026C	NPP1	TFIID	TATA-containing	8556	3340.3	2.97125
YCR027C	RHB1	TFIID	TATA-less	8577.6	2342	3.15077
YCR028C	FEN2	TFIID	TATA-containing	9897.5	2574	3.48222
YCR028C-A	RIM1	TFIID	TATA-less	9723.7	3026.1	3.74117
YCR030C	SYP1	TFIID	TATA-less			2.28198
YCR031C	RPS14A	TFIID	TATA-containing	14897.3	3900.5	3.41674
YCR032W	BPH1	TFIID		12418.7	2880.6	3.0905
YCR033W	SNT1	TFIID	TATA-less	10243.7	2776.1	2.41166
YCR034W	ELO2	TFIID	TATA-less	11495.3	3132.5	4.53298
YCR035C	RRP43	TFIID	TATA-less			2.65965
YCR036W	RBK1	TFIID	TATA-less	9391.9	3537.2	3.79438
YCR037C	PHO87	TFIID	TATA-less			2.31595
YCR038C	BUD5	TFIID				0.9282
YCR039C
YCR040W
YCR041W
YCR042C	TAF2	TFIID	TATA-less			2.19663
YCR043C	YCR043C	TFIID	TATA-less			3.77978
YCR044C	PER1	TFIID	TATA-less			4.23618
YCR045C
YCR046C
YCR047C	BUD23	TFIID	TATA-less			2.49295
YCR048W	ARE1	TFIID	TATA-less			6.43944
YCR050C
YCR051W	YCR051W	TFIID	TATA-less			3.58263
YCR052W	RSC6	TFIID	TATA-less			4.18474
YCR053W	THR4	TFIID	TATA-less	19632.6	3790.1	5.18963
YCR054C	CTR86	TFIID	TATA-less			1.96334
YCR057C	PWP2	TFIID	TATA-less	13132.4	3546.4	3.36409
YCR059C	YIH1	TFIID				4.32648
YCR060W				13682.7	3423.3
YCR061W
YCR063W	BUD31	TFIID	TATA-less	14692.3	3328.5	8.65757
YCR065W	HCM1	CR	TATA-less			0.973795
YCR066W	RAD18	TFIID	TATA-less			3.40487
YCR067C	SED4	TFIID	TATA-less	12280.4	2905.9	3.75132
YCR068W	ATG15	TFIID	TATA-less	8560.6	2763.9	3.76889
YCR069W	CPR4	TFIID	TATA-less			3.23795
YCR071C	IMG2	TFIID	TATA-less	11830	3238	5.57481
YCR072C	RSA4	TFIID	TATA-less	9951.8	2930	2.29305
YCR073C	SSK22	TFIID	TATA-less			2.41228
YCR073W-A	SOL2	TFIID	TATA-less	5566.1	1947.5	4.70504
YCR075C	ERS1	TFIID	TATA-less			3.5169
YCR075W-A	YCR075W-A	TFIID				3.3891
YCR076C
YCR077C	PAT1	TFIID	TATA-less	21264	3322.5	5.02406
YCR079W	PTC6	TFIID	TATA-less			5.40571
YCR081W	SRB8	TFIID	TATA-containing			2.68451
YCR082W	AHC2	TFIID	TATA-containing	15383.6	3862.8	5.85631
YCR083W	TRX3	TFIID	TATA-less			3.74449
YCR084C	TUP1	TFIID	TATA-less	14449.8	3547.8	3.56269
YCR086W	CSM1	TFIID	TATA-less			3.23714
YCR087C-A	YCR087C-A	TFIID	TATA-less			3.97944
YCR088W	ABP1	TFIID	TATA-less			2.84793
YCR089W	FIG2	TFIID	TATA-less			3.52178
YCR090C	YCR090C	TFIID	TATA-less			3.04119
YCR091W	KIN82	TFIID				2.43051
YCR092C	MSH3	TFIID	TATA-less			4.29716
YCR093W	CDC39	TFIID	TATA-less	19734.3	3822.8	4.05311
YCR094W	CDC50	TFIID	TATA-less	10734.2	2284.4	2.42999
YCR095C	OCA4	TFIID	TATA-less			2.2222
YCR095W-A	YCR095W-A	TFIID	TATA-less	5174.4	1897.1	1.79245
YCR096C
YCR097W
YCR098C
YCR099C	YCR099C	TFIID				0.891155
YCR100C	YCR100C	TFIID				1.45827
YCR101C	YCR101C	TFIID				1.85825
YCR102C	YCR102C	CR				1.71844
YCR104W
YCR105W
YCR106W	RDS1	TFIID	TATA-less			2.6782
YCR107W	AAD3	TFIID				0.70551
YDL001W	RMD1	TFIID	TATA-less			3.22658
YDL002C	NHP10	TFIID	TATA-less			3.75016
YDL003W	MCD1	CR	TATA-containing			1.30032
YDL004W	ATP16	TFIID	TATA-less	13916	3334.8	4.49024
YDL005C	MED2	TFIID	TATA-less			3.45364
YDL006W	PTC1	TFIID	TATA-less			2.07842
YDL007C-A
YDL007W	RPT2	TFIID	TATA-less	10822.2	3205.7	2.94861
YDL008W	APC11	TFIID	TATA-less			4.94956
YDL009C
YDL010W	GRX6	TFIID	TATA-less			2.07242
YDL012C	YDL012C	TFIID	TATA-containing			3.23349
YDL013W	SLX5	TFIID	TATA-less			3.5272
YDL014W	NOP1	TFIID		15490.9	3282.7	4.13933
YDL015C	TSC13	TFIID	TATA-less			2.15019
YDL017W	CDC7	TFIID	TATA-less			2.58244
YDL018C	ERP3	TFIID	TATA-less			2.92787
YDL019C	OSH2	TFIID	TATA-less			2.64768
YDL020C	RPN4	CR	TATA-containing			1.88877
YDL021W
YDL022C-A
YDL022W	GPD1	CR	TATA-containing			1.61177
YDL024C
YDL025C	RTK1	CR	TATA-less			3.25926
YDL027C	YDL027C	TFIID	TATA-less	10080.2	2867	2.60791
YDL028C	MPS1	TFIID	TATA-less	15644.9	2453.9	1.68938
YDL029W	ARP2	CR	TATA-less	14445.9	3264.2	2.69104
YDL030W	PRP9	TFIID	TATA-less			3.4876
YDL031W	DBP10	TFIID	TATA-less	11840	2969	3.0185
YDL033C	SLM3	TFIID	TATA-less	10625.9	3097.9	2.75299
YDL035C	GPR1	TFIID	TATA-containing			2.52066
YDL036C	PUS9	TFIID	TATA-less			2.50827
YDL037C	BSC1	CR	TATA-less			1.6287
YDL039C	PRM7	CR				2.18949
YDL040C	NAT1	TFIID	TATA-less	10206.2	2702.9	3.08824
YDL042C	SIR2	TFIID	TATA-less			3.05585
YDL043C	PRP11	TFIID	TATA-less			2.93768
YDL044C	MTF2	TFIID				2.96488
YDL045C	FAD1	TFIID	TATA-less	8840	2927.7	2.68318
YDL045W-A	MRP10	TFIID	TATA-containing	5424	2319	3.62484
YDL046W	NPC2	TFIID	TATA-containing	12336.6	3124.6	4.12216
YDL047W	SIT4	TFIID	TATA-less			2.95746
YDL048C
YDL049C
YDL051W	LHP1	TFIID	TATA-less			3.69027
YDL052C	SLC1	TFIID	TATA-less	16432.5	3142.5	5.76217
YDL053C	PBP4	TFIID	TATA-containing			1.34992
YDL054C	MCH1	TFIID	TATA-less			2.00386
YDL055C	PSA1	CR	TATA-containing			1.32934
YDL056W	MBP1	TFIID	TATA-less	9695.7	2394.7	3.39232
YDL057W
YDL058W	USO1	TFIID	TATA-less			4.57608
YDL059C	RAD59	TFIID	TATA-less	14168.5	3533	7.5232
YDL060W	TSR1	TFIID	TATA-less			3.59869
YDL061C	RPS29B	TFIID	TATA-less	20454	4392.8	4.65472
YDL063C	SYO1	TFIID	TATA-less	11981.1	3466.9	2.96982
YDL064W	UBC9	TFIID				3.01258
YDL065C	PEX19	TFIID	TATA-less			2.86667
YDL066W	IDP1	CR	TATA-less	11746.9	2999.8	5.87982
YDL067C	COX9	TFIID	TATA-less	12767.7	3832.1	5.94889
YDL069C	CBS1	TFIID				3.49857
YDL070W	BDF2	CR	TATA-containing			0.551375
YDL072C	YET3	TFIID	TATA-containing	12126.8	3194.3	4.49864
YDL073W	YDL073W	TFIID	TATA-less			3.01677
YDL074C	BRE1	TFIID	TATA-less	14719	2839.7	2.91908
YDL075W	RPL31A	TFIID	TATA-less	13692.7	3402.4	2.88053
YDL076C	RXT3	TFIID				2.5364
YDL077C	VAM6	TFIID	TATA-less			3.26125
YDL078C	MDH3	TFIID	TATA-containing			4.06949
YDL079C
YDL080C	THI3	TFIID	TATA-less			3.72309
YDL081C	RPP1A	TFIID	TATA-less	17208.3	3770.9	4.31517
YDL082W	RPL13A	TFIID	TATA-less	13521.1	2813.5	2.8892
YDL083C	RPS16B	TFIID	TATA-less	21539.4	3563.5	3.33933
YDL084W	SUB2	TFIID	TATA-less	17618.7	3081	3.2866
YDL085C-A	YDL085C-A	TFIID	TATA-less			3.08264
YDL085W
YDL086W	YDL086W	TFIID	TATA-containing			4.24399
YDL087C	LUC7	TFIID	TATA-less			3.40863
YDL088C	ASM4	TFIID	TATA-less			2.11813
YDL089W	NUR1	TFIID	TATA-less			2.78485
YDL090C	RAM1	TFIID				3.89833
YDL091C	UBX3	TFIID	TATA-less			2.94945
YDL092W	SRP14	TFIID	TATA-less	14049.7	2800.7	3.79639
YDL093W	PMT5	TFIID	TATA-less			2.7249
YDL095W	PMT1	TFIID	TATA-less	15070.6	3517.3	4.87364
YDL097C	RPN6	TFIID	TATA-less	15502.7	2711.9	4.7503
YDL098C	SNU23	TFIID				2.52705
YDL099W	BUG1	TFIID				2.92902
YDL100C	GET3	TFIID	TATA-less	10692.9	2698.8	3.62188
YDL101C	DUN1	TFIID	TATA-less			1.92083
YDL102W	POL3	TFIID	TATA-containing	11277.1	2608.5	2.11481
YDL103C	QRI1	TFIID	TATA-less	11277.1	2608.5	3.47559
YDL104C	QRI7	TFIID	TATA-less			1.76164
YDL105W	NSE4	TFIID	TATA-less			2.33243
YDL106C	PHO2	TFIID	TATA-less	13429.5	3093.4	3.25006
YDL107W	MSS2	TFIID				3.62458
YDL108W	KIN28	TFIID	TATA-less			2.93113
YDL109C	YDL109C	TFIID		8551.5	2318.7	3.68806
YDL110C	TMA17	CR	TATA-containing			1.71721
YDL111C	RRP42	TFIID	TATA-less	10867.8	2891.8	3.19974
YDL112W	TRM3	TFIID	TATA-less	10964.9	2716.4	2.52832
YDL113C	ATG20	TFIID				3.19447
YDL114W
YDL115C	IWR1	TFIID	TATA-less	10193	2690.2	3.09809
YDL116W	NUP84	TFIID	TATA-less	13217	2807.7	2.27658
YDL117W	CYK3	CR	TATA-less			2.10146
YDL119C	YDL119C	TFIID	TATA-less	12520.7	2846.1	5.47939
YDL120W	YFH1	TFIID	TATA-less	11630	2988.7	3.57267
YDL121C	YDL121C	TFIID	TATA-less			2.51099
YDL122W	UBP1	TFIID				1.92457
YDL123W	SNA4	CR	TATA-containing			2.47797
YDL124W	YDL124W	CR	TATA-containing			2.34147
YDL125C	HNT1	CR	TATA-less	13972.7	3723.1	5.13993
YDL126C	CDC48	TFIID	TATA-less	11409.4	3795.6	5.47199
YDL127W	PCL2	CR	TATA-containing			2.52137
YDL128W	VCX1	TFIID	TATA-less			3.49531
YDL129W	YDL129W	TFIID	TATA-less			2.49683
YDL130W	RPP1B	TFIID	TATA-less	13861.9	3178.5	3.23374
YDL130W-A	STF1	TFIID	TATA-less			2.32459
YDL131W	LYS21	TFIID	TATA-containing	8905.9	2915.4	4.58249
YDL132W	CDC53	TFIID				2.08019
YDL133C-A	RPL41B	TFIID	TATA-containing	11019.7	3455.7	3.64766
YDL133W	SRF1	TFIID				2.1416
YDL134C	PPH21	TFIID		11292.4	2912.9	2.35484
YDL135C	RDI1	TFIID	TATA-less			2.82084
YDL136W	RPL35B	TFIID	TATA-less	12173.9	3016.5	3.08976
YDL137W	ARF2	TFIID		11247.6	3106.9	4.83054
YDL138W	RGT2	TFIID	TATA-less			2.74326
YDL139C	SCM3	TFIID	TATA-less			1.6077
YDL140C	RPO21	TFIID		11455	3507.3	3.17848
YDL141W	BPL1	TFIID	TATA-less			2.89592
YDL142C	CRD1	TFIID				2.85086
YDL143W	CCT4	TFIID	TATA-less	18864.3	4238	5.7799
YDL144C
YDL145C	COP1	TFIID	TATA-less	23136.9	3074	3.46923
YDL146W	LDB17	TFIID	TATA-less			1.41712
YDL147W	RPN5	TFIID	TATA-less	25782.1	3709.1	4.27148
YDL148C	NOP14	TFIID	TATA-less			2.1656
YDL149W	ATG9	TFIID				1.7133
YDL150W	RPC53	TFIID	TATA-less			2.67228
YDL153C	SAS10	TFIID	TATA-less	7820.6	2268.9	2.53138
YDL154W
YDL155W	CLB3	TFIID	TATA-less	9191	2186.2	1.73494
YDL156W	CMR1	TFIID	TATA-less			1.50832
YDL157C	YDL157C	TFIID	TATA-less			3.24489
YDL159W	STE7	TFIID	TATA-less			2.85997
YDL159W-A				8455.8	1853.6
YDL160C	DHH1	TFIID	TATA-less	18597.9	2614.2	1.83931
YDL160C-A	MHF2	TFIID	TATA-less	7695.2	2345.2	3.15484
YDL161W	ENT1	TFIID	TATA-less	11485.3	3358.5	4.11807
YDL164C	CDC9	TFIID	TATA-less			2.80948
YDL165W	CDC36	TFIID				2.70669
YDL166C	FAP7	TFIID	TATA-containing			2.92861
YDL167C	NRP1	TFIID	TATA-less	13786.4	3330.4	4.28698
YDL168W	SFA1	CR	TATA-less			2.56425
YDL169C
YDL170W	UGA3	CR	TATA-less			1.56955
YDL171C	GLT1	TFIID	TATA-less	9647.1	2927	3.31274
YDL173W	PAR32	TFIID	TATA-less	14657	3654.8	5.8168
YDL174C	DLD1	TFIID	TATA-containing			5.76013
YDL175C	AIR2	TFIID	TATA-less	13492.8	3479.6	4.1492
YDL176W	YDL176W	TFIID	TATA-less			2.97054
YDL177C	YDL177C	TFIID	TATA-less			2.76973
YDL178W	DLD2	TFIID	TATA-less			2.59653
YDL179W	PCL9	CR	TATA-less			2.11245
YDL180W	YDL180W	CR	TATA-less			3.47938
YDL181W	INH1	TFIID	TATA-less			3.83259
YDL182W	LYS20	CR	TATA-containing			3.69602
YDL183C	YDL183C	CR				2.56105
YDL184C	RPL41A	TFIID	TATA-less	13280.3	3812.5	4.05582
YDL185W	VMA1	TFIID	TATA-less			2.03202
YDL186W
YDL188C	PPH22	TFIID	TATA-containing	10898.1	3246.2	2.03672
YDL189W	RBS1	TFIID	TATA-less	13544.6	3429.4	4.69057
YDL190C	UFD2	TFIID	TATA-less			3.18098
YDL191W	RPL35A	TFIID	TATA-less	14641.8	3138.4	3.52157
YDL192W	ARF1	TFIID	TATA-less	15775.9	2965.3	4.4108
YDL193W	NUS1	TFIID	TATA-less	8231.4	2313.1	1.84468
YDL194W	SNF3	TFIID	TATA-less			1.26897
YDL195W	SEC31	TFIID		28171.1	4216.7	4.6619
YDL197C	ASF2	TFIID	TATA-less			3.46521
YDL198C	GGC1	CR	TATA-less			3.51884
YDL199C	YDL199C	TFIID				1.18938
YDL200C	MGT1	TFIID				1.94338
YDL201W	TRM8	TFIID	TATA-less			2.58355
YDL202W	MRPL11	TFIID	TATA-less	10730.9	2850.4	3.41158
YDL203C	ACK1	TFIID	TATA-less	9683.1	2279	2.62562
YDL204W	RTN2	CR	TATA-less			2.83636
YDL205C	HEM3	CR	TATA-less			2.53158
YDL206W	YDL206W	TFIID				1.81798
YDL207W	GLE1	TFIID	TATA-less			2.26631
YDL208W	NHP2	TFIID	TATA-less	25200.7	4480.9	5.18128
YDL209C	CWC2	TFIID	TATA-less			4.87538
YDL210W
YDL211C	YDL211C	TFIID				3.01358
YDL212W	SHR3	TFIID	TATA-containing	12044.2	2572.6	2.91033
YDL213C	NOP6	TFIID	TATA-less			2.66125
YDL214C
YDL215C	GDH2	TFIID	TATA-less			2.82544
YDL216C	RRI1	TFIID				2.55179
YDL217C	TIM22	TFIID	TATA-less	8090.6	3199.8	2.77232
YDL218W
YDL219W	DTD1	TFIID	TATA-less	9276.7	2660.4	2.84769
YDL220C	CDC13	TFIID				2.77555
YDL222C
YDL223C
YDL224C	WHI4	TFIID	TATA-less			1.64611
YDL225W	SHS1	TFIID	TATA-less			2.04465
YDL226C	GCS1	TFIID	TATA-less	15613.7	3132.9	4.10111
YDL227C	HO	CR	TATA-less			0.869475
YDL229W	SSB1	TFIID	TATA-containing	11845.1	3581.5	3.45126
YDL230W	PTP1	TFIID	TATA-less			2.23372
YDL231C	BRE4	TFIID	TATA-less	15461.5	3522.6	3.02865
YDL232W	OST4	TFIID	TATA-less	13873.9	3003.3	3.84564
YDL233W	MFG1	TFIID				3.71899
YDL234C	GYP7	TFIID				2.26252
YDL235C	YPD1	TFIID	TATA-less	8543.6	2645.1	1.85883
YDL236W	PHO13	TFIID	TATA-less	8302.4	2340.2	2.77453
YDL237W	AIM6	TFIID		10584.7	2985.9	2.98745
YDL238C	GUD1	TFIID		10584.7	2985.9	2.29094
YDL239C	ADY3	TFIID				0.74439
YDL240W	LRG1	TFIID	TATA-less			3.8075
YDL241W	YDL241W	TFIID	TATA-containing			0.92517
YDL243C	AAD4	CR				2.84233
YDL244W
YDL245C
YDL246C
YDL247W
YDL248W	COS7	TFIID
YDR001C	NTH1	CR	TATA-containing			3.33209
YDR002W	YRB1	TFIID	TATA-less			2.44325
YDR003W	RCR2	TFIID	TATA-less			2.32868
YDR003W-A	YDR003W-A	TFIID				3.18495
YDR004W	RAD57	TFIID	TATA-less			3.6159
YDR005C	MAF1	TFIID	TATA-less			2.35373
YDR006C	SOK1	TFIID	TATA-less			3.66511
YDR007W
YDR009W
YDR011W	SNQ2	CR	TATA-containing			2.31321
YDR012W	RPL4B	TFIID	TATA-less	18413.8	4332.9	7.10323
YDR013W	PSF1	TFIID	TATA-less	8130.9	2153.1	2.22474
YDR014W	RAD61	TFIID				4.31074
YDR014W-A
YDR016C	DAD1	TFIID	TATA-less	12533.4	3042.9	4.36027
YDR017C	KCS1	TFIID				2.22473
YDR018C
YDR019C	GCV1	CR	TATA-containing			4.61587
YDR020C	DAS2	TFIID	TATA-less			2.44282
YDR021W	FAL1	TFIID				1.45158
YDR022C	ATG31	TFIID	TATA-less			2.86884
YDR023W	SES1	TFIID	TATA-containing			1.90786
YDR025W	RPS11A	TFIID	TATA-less	18403.2	4209.4	3.56806
YDR026C	NSI1	TFIID				3.75509
YDR027C	VPS54	TFIID	TATA-less	11159.3	3283.9	2.54197
YDR028C	REG1	TFIID	TATA-less			2.6163
YDR030C	RAD28	TFIID				1.43278
YDR031W	MIX14	TFIID				2.09098
YDR032C	PST2	CR	TATA-containing			2.70301
YDR033W	MRH1	CR	TATA-containing			0.459075
YDR034C	LYS14	TFIID	TATA-less			3.84396
YDR034C-A
YDR034C-C
YDR034C-D
YDR034W-B
YDR035W	ARO3	TFIID	TATA-less	8591.8	2042.4	2.43771
YDR036C	EHD3	TFIID	TATA-less			3.29279
YDR037W	KRS1	CR	TATA-containing			2.50413
YDR038C
YDR039C
YDR040C
YDR041W	RSM10	TFIID	TATA-less			2.77696
YDR042C
YDR043C	NRG1	CR	TATA-containing			1.13908
YDR044W	HEM13	TFIID	TATA-containing			2.7146
YDR045C	RPC11	TFIID	TATA-less	10932.2	2988.9	2.58197
YDR046C	BAP3	CR	TATA-less			1.46592
YDR047W	HEM12	TFIID	TATA-less			3.12584
YDR049W	VMS1	TFIID	TATA-less			2.2668
YDR050C	TPI1	CR	TATA-less			1.79608
YDR051C	DET1	TFIID	TATA-less			2.46056
YDR052C	DBF4	TFIID	TATA-less			2.18568
YDR054C	CDC34	TFIID	TATA-less			2.54364
YDR055W	PST1	CR	TATA-containing			1.69465
YDR056C	YDR056C	TFIID	TATA-containing			2.65689
YDR057W	YOS9	TFIID	TATA-less			3.26289
YDR058C	TGL2	TFIID				2.11985
YDR059C	UBC5	TFIID	TATA-containing			2.00103
YDR060W	MAK21	TFIID		15290.4	3573.7	2.3459
YDR061W	YDR061W	TFIID	TATA-less			2.20038
YDR062W	LCB2	TFIID	TATA-less	10438.3	2128.9	2.28103
YDR063W	AIM7	TFIID				2.10023
YDR064W	RPS13	TFIID	TATA-less	18273.9	3846.3	2.49972
YDR065W	RRG1	TFIID				3.32804
YDR066C	RTR2	TFIID				4.12437
YDR067C	OCA6	TFIID				2.37979
YDR068W	DOS2	TFIID	TATA-less			2.12272
YDR069C	DOA4	CR	TATA-less			1.25087
YDR070C
YDR071C	PAA1	TFIID	TATA-less	7217.3	2620.3	2.57604
YDR072C	IPT1	CR	TATA-less			2.4486
YDR073W	SNF11	CR	TATA-containing			3.33454
YDR074W	TPS2	CR	TATA-less			3.48326
YDR075W	PPH3	TFIID	TATA-less	9186.3	2985.1	2.64261
YDR076W	RAD55	TFIID	TATA-less			1.41928
YDR077W	SED1	CR	TATA-containing			2.44663
YDR078C	SHU2	TFIID	TATA-less			2.36074
YDR079C-A	TFB5	TFIID				4.02549
YDR079W	PET100	TFIID				2.58873
YDR080W	VPS41	TFIID	TATA-less			2.6929
YDR081C	PDC2	TFIID	TATA-less			2.66762
YDR082W	STN1	TFIID	TATA-less	14113.2	3094.3	2.85474
YDR083W	RRP8	TFIID	TATA-less			1.36667
YDR084C	TVP23	TFIID	TATA-less			2.54574
YDR085C	AFR1	TFIID				1.0628
YDR086C	SSS1	TFIID	TATA-less	10430.2	2469.3	2.77816
YDR087C	RRP1	TFIID	TATA-less	11059	2700.1	2.24553
YDR088C	SLU7	TFIID	TATA-less			2.65424
YDR089W	YDR089W	CR	TATA-less			1.10137
YDR090C	YDR090C	TFIID	TATA-containing			1.8381
YDR091C	RLI1	TFIID	TATA-less	15474	3129.3	3.58428
YDR092W	UBC13	TFIID		10345.9	2549.1	3.76789
YDR093W	DNF2	TFIID	TATA-less			3.10746
YDR096W	GIS1	TFIID				2.23832
YDR097C	MSH6	TFIID	TATA-less			1.63682
YDR098C	GRX3	TFIID	TATA-less	8760.3	3011.6	2.98733
YDR098C-A
YDR098C-B
YDR099W	BMH2	TFIID		10526.2	2702.7	2.39376
YDR100W	TVP15	TFIID	TATA-less			2.62062
YDR101C	ARX1	TFIID	TATA-less	9629.6	3057.2	2.71308
YDR103W	STE5	TFIID	TATA-less	8162.5	2675.1	2.05376
YDR104C	SPO71	TFIID	TATA-less	8896.3	2273.4	2.82546
YDR105C	TMS1	TFIID		11046.7	2890.9	4.20235
YDR106W
YDR107C	TMN2	TFIID				1.97953
YDR108W	TRS85	TFIID				2.98258
YDR109C	YDR109C	TFIID				3.23083
YDR110W	FOB1	TFIID	TATA-less			2.46002
YDR111C	ALT2	TFIID	TATA-less			2.77445
YDR113C	PDS1	TFIID	TATA-less			2.09097
YDR114C				13435.1	3068.6
YDR115W	YDR115W	TFIID	TATA-less	13435.1	3068.6	5.06201
YDR116C	MRPL1	TFIID	TATA-less			3.06804
YDR117C	TMA64	TFIID	TATA-less	8820.9	2659.4	1.96185
YDR118W	APC4	TFIID	TATA-less			2.65523
YDR119W	VBA4	TFIID	TATA-less	7327.3	2769.4	2.14405
YDR119W-A
YDR120C	TRM1	TFIID	TATA-less	9915.2	3223.8	2.49029
YDR121W	DPB4	TFIID	TATA-less			1.69542
YDR122W	KIN1	TFIID		8766.1	2786.4	2.23678
YDR123C	INO2	TFIID	TATA-less			3.50576
YDR124W
YDR125C	ECM18	TFIID				2.36328
YDR126W				9946.4	2756.2
YDR127W	ARO1	CR	TATA-less			5.22549
YDR128W	MTC5	TFIID	TATA-less	13260.9	3130.4	3.84799
YDR129C	SAC6	TFIID	TATA-less			2.58523
YDR130C	FIN1	TFIID	TATA-less	11637.9	2986	3.10189
YDR131C	YDR131C	TFIID	TATA-less			1.77012
YDR132C	YDR132C	CR	TATA-less			2.80781
YDR134C
YDR135C	YCF1	CR	TATA-containing			2.79873
YDR137W	RGP1	TFIID	TATA-less			3.09666
YDR138W	HPR1	TFIID	TATA-less	10038.3	3073.7	3.03595
YDR139C	RUB1	TFIID		9453.5	2841.7	3.64958
YDR140W	MTQ2	TFIID	TATA-containing			3.09841
YDR141C	DOP1	TFIID	TATA-less			2.66488
YDR142C	PEX7	TFIID	TATA-less	7858	2339.1	2.85227
YDR143C	SAN1	TFIID	TATA-less	8517.5	2211.3	2.04648
YDR144C	MKC7	TFIID	TATA-less	8173.6	2317.8	2.407
YDR145W	TAF12	TFIID	TATA-less	13326.6	3191.3	4.46176
YDR146C	SWI5	TFIID	TATA-less			2.46123
YDR147W	EKI1	TFIID	TATA-less	11954.9	3955.5	5.25288
YDR148C	KGD2	TFIID	TATA-less	8435.4	2807	2.5097
YDR150W	NUM1	TFIID				3.57341
YDR151C	CTH1	TFIID	TATA-less	11244.7	3122.5	4.95183
YDR152W	GIR2	TFIID	TATA-less	10178	3141.8	2.86712
YDR153C	ENT5	TFIID	TATA-less			1.33519
YDR155C	CPR1	CR	TATA-containing			2.91902
YDR156W	RPA14	TFIID	TATA-less	11192.7	3182.7	3.48326
YDR158W	HOM2	CR	TATA-less	8626.1	2451.3	2.68339
YDR159W	SAC3	TFIID	TATA-less	10747.9	2445.8	3.0682
YDR160W	SSY1	TFIID	TATA-less	8892.7	2048	2.33287
YDR161W	YDR161W	TFIID	TATA-less	8449.7	2355.4	2.10516
YDR162C	NBP2	TFIID	TATA-less			3.54318
YDR163W	CWC15	TFIID	TATA-less			3.78534
YDR164C	SEC1	TFIID	TATA-less			3.42959
YDR165W	TRM82	TFIID	TATA-less	11144	2818.5	3.65437
YDR166C	SEC5	TFIID				2.12228
YDR167W	TAF10	TFIID	TATA-less			2.87717
YDR168W	CDC37	TFIID	TATA-less	8813.2	2813.4	3.53428
YDR169C	STB3	TFIID	TATA-less			2.795
YDR169C-A				13412.3	3604.7
YDR170C	SEC7	TFIID	TATA-less			2.50012
YDR170W-A
YDR171W	HSP42	CR	TATA-containing			2.09681
YDR172W	SUP35	TFIID	TATA-less	19336.4	4095	5.97726
YDR173C	ARG82	CR	TATA-less			4.24702
YDR174W	HMO1	TFIID	TATA-less	17714.1	4319.4	7.35239
YDR175C	RSM24	TFIID	TATA-less			3.06749
YDR176W	NGG1	TFIID	TATA-less	18317.7	3566.9	3.89602
YDR177W	UBC1	TFIID	TATA-less	13324	2569.8	3.14594
YDR178W	SDH4	TFIID	TATA-containing			2.57862
YDR179C	CSN9	TFIID				1.83557
YDR179W-A	YDR179W-A	TFIID				1.92999
YDR180W	SCC2	TFIID	TATA-less			1.89198
YDR181C	SAS4	TFIID				1.7838
YDR182W	CDC1	TFIID				2.32634
YDR182W-A
YDR183W	PLP1	TFIID		10657.9	2369.9	2.96717
YDR184C	ATC1	TFIID	TATA-less	7140.9	2720.8	2.95735
YDR185C
YDR186C	YDR186C	TFIID	TATA-less			3.07388
YDR188W	CCT6	TFIID	TATA-less	14795.9	3592.7	6.88074
YDR189W	SLY1	TFIID	TATA-less	12274.2	2412	3.47045
YDR190C	RVB1	TFIID	TATA-less	18310.8	3182.7	3.45263
YDR191W	HST4	TFIID	TATA-less			2.46789
YDR192C	NUP42	TFIID	TATA-less			3.34993
YDR194C	MSS116	TFIID	TATA-containing	11201.4	2635.8	3.49264
YDR194W-A				9654.1	2359.3
YDR195W	REF2	CR	TATA-containing	12033.3	3123.9	3.30289
YDR196C	CAB5	TFIID	TATA-less			3.48323
YDR197W	CBS2	TFIID	TATA-less	7218.2	2026.8	2.06256
YDR198C	RKM2	TFIID	TATA-less			1.69912
YDR200C	VPS64	TFIID	TATA-less			3.1606
YDR201W	SPC19	TFIID				3.46943
YDR202C	RAV2	TFIID				2.9341
YDR204W	COQ4	TFIID				3.60204
YDR205W	MSC2	TFIID	TATA-less	12296.7	2604.2	4.03613
YDR206W	EBS1	TFIID	TATA-less	11355.1	2707.3	1.89431
YDR207C	UME6	TFIID	TATA-less			3.3555
YDR208W	MSS4	TFIID	TATA-less			3.97167
YDR210C-C
YDR210C-D
YDR210W	YDR210W	CR	TATA-containing			3.7471
YDR210W-A
YDR210W-B
YDR211W	GCD6	TFIID	TATA-containing			3.14343
YDR212W	TCP1	TFIID	TATA-less	13521.2	3523.1	3.56974
YDR213W	UPC2	TFIID				2.47193
YDR214W	AHA1	CR	TATA-less			2.16419
YDR216W	ADR1	TFIID				1.48334
YDR217C	RAD9	TFIID				3.21219
YDR218C
YDR219C	MFB1	TFIID	TATA-less	12757.5	2977.9	2.34923
YDR221W	GTB1	TFIID	TATA-less	13618.9	3051.7	6.12397
YDR222W	YDR222W	CR	TATA-containing			2.78468
YDR223W
YDR224C	HTB1	CR	TATA-containing			5.21843
YDR225W	HTA1	CR	TATA-containing	14167.6	3311.9	7.71063
YDR226W	ADK1	CR	TATA-containing			3.69744
YDR227W	SIR4	TFIID	TATA-less			1.70829
YDR228C	PCF11	TFIID	TATA-less	12063	2701.7	3.09505
YDR229W	IVY1	TFIID				2.72103
YDR231C	COX20	TFIID	TATA-less			3.9087
YDR232W	HEM1	TFIID	TATA-less			2.67883
YDR233C	RTN1	TFIID	TATA-containing			3.67959
YDR234W	LYS4	TFIID	TATA-containing	14132.8	3224	4.72479
YDR235W	PRP42	TFIID	TATA-less			2.89201
YDR236C	FMN1	TFIID	TATA-less			4.90759
YDR237W	MRPL7	TFIID	TATA-less			3.66147
YDR238C	SEC26	TFIID	TATA-less	11982.8	3423.4	3.33183
YDR239C	YDR239C	TFIID	TATA-less			2.85384
YDR240C	SNU56	TFIID				3.21662
YDR242W	AMD2	TFIID				3.0322
YDR243C	PRP28	TFIID				2.0953
YDR244W	PEX5	TFIID	TATA-containing			2.28846
YDR245W	MNN10	TFIID	TATA-less	9116.4	2271.3	2.21725
YDR246W	TRS23	TFIID	TATA-less	8672.5	2322.8	2.24138
YDR246W-A
YDR247W	VHS1	CR	TATA-less			1.75896
YDR248C	YDR248C	TFIID	TATA-containing			2.18187
YDR249C	YDR249C	TFIID	TATA-less			4.04098
YDR251W	PAM1	TFIID	TATA-less			2.28883
YDR252W	BTT1	TFIID	TATA-less			2.50402
YDR253C	MET32	TFIID	TATA-less			2.12262
YDR254W	CHL4	TFIID	TATA-less			2.21583
YDR255C	RMD5	TFIID	TATA-less			1.81534
YDR256C
YDR257C	RKM4	TFIID	TATA-less	6381.5	2425.8	1.98225
YDR258C	HSP78	TFIID	TATA-containing			1.77855
YDR259C
YDR260C	SWM1	TFIID	TATA-less	11122.2	3558.9	4.35665
YDR261C	EXG2	TFIID	TATA-containing			2.97394
YDR261C-C
YDR261C-D
YDR261W-A
YDR261W-B
YDR262W	YDR262W	TFIID	TATA-containing			2.38145
YDR263C
YDR264C	AKR1	TFIID	TATA-less			2.8313
YDR265W	PEX10	TFIID	TATA-less	11191.9	2926.3	3.81902
YDR266C	HEL2	TFIID	TATA-less	7868.7	2123.7	1.85656
YDR267C	CIA1	TFIID	TATA-less	7400.4	1999.6	3.09068
YDR268W	MSW1	TFIID	TATA-less			2.65192
YDR270W	CCC2	CR	TATA-less			2.22523
YDR272W	GLO2	TFIID	TATA-less	8343.6	2361.8	2.46477
YDR273W
YDR275W	BSC2	CR				2.14741
YDR276C	PMP3	CR	TATA-containing			2.51138
YDR277C	MTH1	TFIID	TATA-less			1.42856
YDR279W	RNH202	TFIID				2.95019
YDR280W	RRP45	TFIID	TATA-less	9034.3	2423.4	2.51643
YDR281C
YDR282C	YDR282C	TFIID	TATA-containing			4.38605
YDR283C	GCN2	TFIID				2.51649
YDR284C	DPP1	TFIID	TATA-less			2.67167
YDR285W	ZIP1	TFIID				2.63228
YDR286C	YDR286C	TFIID				2.00716
YDR287W	INM2	TFIID				2.74964
YDR288W	NSE3	TFIID	TATA-less			3.39062
YDR289C	RTT103	TFIID				2.27962
YDR291W	HRQ1	TFIID				1.77625
YDR292C	SRP101	TFIID	TATA-less	10043.3	2497.2	2.62399
YDR293C	SSD1	TFIID	TATA-less			1.88682
YDR294C	DPL1	TFIID	TATA-containing	7799.9	2384.7	2.59438
YDR295C	HDA2	TFIID	TATA-less			1.52859
YDR296W	MHR1	TFIID	TATA-less			2.91146
YDR297W	SUR2	TFIID	TATA-containing			2.99069
YDR298C	ATP5	TFIID	TATA-less	12931	2868.8	3.07577
YDR299W	BFR2	TFIID	TATA-containing			2.30084
YDR300C	PRO1	TFIID	TATA-less	10660	3197.5	3.06424
YDR301W	CFT1	TFIID	TATA-less	15535	3925.7	4.15421
YDR302W	GPI11	TFIID		9440.5	2518.1	2.7792
YDR303C	RSC3	TFIID	TATA-less	17805.4	3533.5	6.1371
YDR304C	CPR5	TFIID				3.52962
YDR305C	HNT2	TFIID	TATA-less			3.07212
YDR306C	YDR306C	TFIID				3.99396
YDR307W	PMT7	TFIID	TATA-less	12974.5	3901.8	4.17529
YDR308C	SRB7	TFIID	TATA-less	7759.5	2610.4	3.16326
YDR309C	GIC2	CR	TATA-containing			2.48156
YDR310C	SUM1	TFIID	TATA-less	7211.9	1895.9	1.95775
YDR311W	TFB1	TFIID	TATA-less	12491.2	2753.2	2.91864
YDR312W	SSF2	TFIID	TATA-less	10881	2996.4	3.60004
YDR313C	PIB1	TFIID	TATA-less			1.38862
YDR314C	RAD34	TFIID	TATA-less			3.14197
YDR315C	IPK1	TFIID				3.2242
YDR316W	OMS1	TFIID	TATA-less	8913.3	2195.7	2.86282
YDR316W-A
YDR316W-B
YDR317W
YDR318W	MCM21	TFIID				2.79148
YDR319C	YFT2	TFIID	TATA-less			2.08632
YDR320C	SWA2	TFIID	TATA-less			4.88223
YDR320C-A	DAD4	TFIID		11747.5	2498	4.6925
YDR321W	ASP1	TFIID	TATA-less			4.06049
YDR322C-A	TIM11	TFIID	TATA-containing			3.32322
YDR322W	MRPL35	TFIID	TATA-less	9554.2	3120.9	3.1833
YDR323C	PEP7	TFIID	TATA-less			2.79244
YDR324C	UTP4	TFIID	TATA-less	15703.7	2909.1	4.15102
YDR325W	YCG1	TFIID	TATA-less	9349.5	2810.8	2.76697
YDR326C	YSP2	TFIID	TATA-containing	10626.9	2707.4	2.18454
YDR328C	SKP1	TFIID	TATA-less	12756.2	2902.4	3.38438
YDR329C	PEX3	TFIID	TATA-less			3.07919
YDR330W	UBX5	TFIID	TATA-less	13849.4	2963	2.71219
YDR331W	GPI8	TFIID	TATA-less	10712.8	2989.6	3.57776
YDR332W	IRC3	TFIID	TATA-less			3.44087
YDR333C	RQC1	TFIID	TATA-less			3.84989
YDR334W	SWR1	TFIID	TATA-less	37193.1	1714	1.69034
YDR335W	MSN5	TFIID	TATA-less	11504.3	3077.2	3.89596
YDR336W	YDR336W	TFIID		9418.7	2380.6	3.51371
YDR337W	MRPS28	TFIID	TATA-less			4.1967
YDR338C	YDR338C	TFIID				2.84336
YDR339C	FCF1	TFIID	TATA-less	14663.5	3393	3.71625
YDR341C	YDR341C	TFIID	TATA-less	9458.3	3247.4	3.35778
YDR342C
YDR343C
YDR345C	HXT3	CR	TATA-containing			1.7086
YDR346C	SVF1	TFIID				3.72298
YDR347W	MRP1	TFIID	TATA-less	14122.2	3552.1	3.81621
YDR348C	PAL1	TFIID	TATA-less			2.76458
YDR349C	YPS7	TFIID	TATA-less			4.5474
YDR350C	ATP22	TFIID	TATA-less			2.73748
YDR351W	SBE2	TFIID	TATA-less	10864.2	2941.5	1.93355
YDR352W	YPQ2	TFIID				2.31557
YDR353W	TRR1	CR	TATA-less			4.66341
YDR354W	TRP4	TFIID	TATA-less	8966.3	2291.8	2.49002
YDR356W	SPC110	TFIID		9130.4	3114	2.29111
YDR357C	CNL1	TFIID	TATA-less	10917.5	3577.4	3.12081
YDR358W	GGA1	TFIID	TATA-containing			1.78187
YDR359C	EAF1	TFIID	TATA-less			1.08335
YDR361C	BCP1	TFIID	TATA-less			2.0598
YDR362C	TFC6	TFIID	TATA-less	10565.6	3130.9	3.92873
YDR363W	ESC2	TFIID	TATA-less			2.98199
YDR363W-A	SEM1	TFIID	TATA-less	10397.2	2267	4.6189
YDR364C	CDC40	TFIID	TATA-less			3.34902
YDR365C	ESF1	TFIID	TATA-less			2.23187
YDR365W-A
YDR365W-B
YDR366C
YDR367W	KEI1	TFIID	TATA-less			2.35945
YDR368W	YPR1	TFIID	TATA-less			2.31755
YDR369C	XRS2	TFIID				1.60662
YDR370C	DXO1	TFIID	TATA-less	8756.9	2183.2	2.80477
YDR371W	CTS2	TFIID	TATA-less			3.00876
YDR372C	VPS74	TFIID	TATA-less	14170.3	2953.8	3.55684
YDR373W	FRQ1	TFIID	TATA-less			2.00545
YDR374C
YDR374W-A	WIP1	TFIID	TATA-less			2.67976
YDR375C	BCS1	TFIID	TATA-less			3.08405
YDR376W	ARH1	TFIID				3.07867
YDR377W	ATP17	TFIID	TATA-less	10378.8	3170.7	3.14235
YDR378C	LSM6	TFIID	TATA-less	18015.8	3291.9	5.11828
YDR379C-A
YDR379W	RGA2	TFIID	TATA-less			2.79338
YDR380W	ARO10	CR				1.05
YDR381C-A	YDR381C-A	TFIID	TATA-containing			1.68117
YDR381W	YRA1	CR	TATA-containing			0.53748
YDR382W	RPP2B	TFIID	TATA-less	18845.9	4112.8	5.00634
YDR383C	NKP1	TFIID				3.21962
YDR384C	ATO3	TFIID	TATA-less			1.68261
YDR385W	EFT2	TFIID	TATA-less	11649.6	2738.3	4.62879
YDR386W	MUS81	TFIID	TATA-less			1.62445
YDR387C	YDR387C	TFIID	TATA-less			3.39043
YDR388W	RVS167	TFIID	TATA-less	10674.9	3095.6	3.81973
YDR389W	SAC7	TFIID				2.53231
YDR390C	UBA2	TFIID	TATA-less	9226.9	3094.6	3.5832
YDR391C	YDR391C	TFIID				2.99422
YDR392W
YDR393W	SHE9	TFIID	TATA-less			2.30828
YDR394W	RPT3	TFIID	TATA-less	11551.2	3118.9	3.51328
YDR395W	SXM1	TFIID	TATA-less			3.12626
YDR397C	NCB2	CR	TATA-containing	9464.8	2907.6	5.18079
YDR398W	UTP5	TFIID	TATA-less	9705.8	2819.2	4.20861
YDR399W	HPT1	CR	TATA-less			4.14255
YDR400W	URH1	TFIID	TATA-less			4.80453
YDR402C
YDR403W
YDR404C	RPB7	TFIID	TATA-less	14938.5	3078.4	3.45715
YDR405W	MRP20	TFIID	TATA-less			2.55612
YDR406W	PDR15	CR	TATA-containing			0.940105
YDR407C	TRS120	TFIID	TATA-containing			3.44695
YDR408C	ADE8	TFIID	TATA-less	11028.1	3280.9	5.57228
YDR409W	SIZ1	TFIID	TATA-less	9302.5	2282.7	3.07274
YDR410C	STE14	TFIID	TATA-containing	18652.6	2970.8	3.86863
YDR411C	DFM1	TFIID	TATA-less			3.79133
YDR412W	RRP17	TFIID	TATA-less			2.82532
YDR414C	ERD1	TFIID				2.06033
YDR415C	YDR415C	TFIID	TATA-less			1.99588
YDR416W	SYF1	TFIID	TATA-less			2.49205
YDR418W	RPL12B	TFIID	TATA-less	23477.4	4668.7	5.25753
YDR419W	RAD30	TFIID		10236.7	3210.2	4.72908
YDR420W	HKR1	TFIID	TATA-less	9098.5	2301.5	4.28921
YDR421W	ARO80	TFIID		8426.4	2396.2	2.81131
YDR422C	SIP1	TFIID	TATA-less	12273.9	2492.4	3.55209
YDR423C	CAD1	TFIID	TATA-less			4.94707
YDR424C	DYN2	TFIID	TATA-less			4.00238
YDR425W	SNX41	TFIID				3.41141
YDR427W	RPN9	TFIID	TATA-less	24981.3	3605.9	3.09135
YDR428C
YDR429C	TIF35	TFIID	TATA-less	19362.7	4029.2	4.69426
YDR430C	CYM1	TFIID		16324	2638.1	4.86517
YDR432W	NPL3	TFIID	TATA-less			2.76074
YDR434W	GPI17	TFIID	TATA-containing			3.04725
YDR435C	PPM1	TFIID				4.06916
YDR436W	PPZ2	TFIID	TATA-less	9819.1	2796.4	4.9639
YDR437W	GPI19	TFIID	TATA-less			2.99062
YDR438W	THI74	TFIID				1.66338
YDR439W	LRS4	TFIID	TATA-less			2.73196
YDR440W	DOT1	TFIID		7749.9	2557	3.00238
YDR441C	APT2	TFIID	TATA-containing	9728.3	2707.7	2.61502
YDR443C	SSN2	TFIID	TATA-less			2.69272
YDR444W	YDR444W	TFIID	TATA-less			3.1239
YDR446W
YDR447C	RPS17B	TFIID	TATA-less	11741.2	3604.9	3.08347
YDR448W	ADA2	TFIID	TATA-containing			2.94135
YDR449C	UTP6	TFIID	TATA-less			2.37624
YDR450W	RPS18A	TFIID	TATA-less	13073.6	3448.7	3.33905
YDR451C	YHP1	CR	TATA-containing			2.10935
YDR452W	PPN1	TFIID	TATA-less			2.30001
YDR453C	TSA2	CR	TATA-less			2.78158
YDR454C	GUK1	TFIID	TATA-less			4.13981
YDR456W	NHX1	TFIID	TATA-less			3.63639
YDR457W	TOM1	TFIID	TATA-less	8106.1	2286.6	1.90421
YDR458C	HEH2	TFIID	TATA-less			2.64042
YDR459C	PFA5	TFIID	TATA-less	9851.7	2661.9	3.76374
YDR460W	TFB3	TFIID	TATA-less			3.23275
YDR461C-A
YDR461W
YDR462W	MRPL28	TFIID	TATA-less	14717.9	3101	4.90024
YDR463W	STP1	TFIID	TATA-less	15934.7	3324.4	3.71713
YDR464W	SPP41	TFIID	TATA-less			1.25344
YDR465C	RMT2	TFIID	TATA-less	8855	2837	2.94812
YDR466W	PKH3	TFIID	TATA-less	10409.9	2689.8	2.57965
YDR468C	TLG1	TFIID	TATA-less			3.3947
YDR469W	SDC1	TFIID				2.5677
YDR470C	UGO1	TFIID				2.34928
YDR471W	RPL27B	TFIID	TATA-less	28463.9	4641	3.76482
YDR472W	TRS31	TFIID	TATA-less	9246.5	2865	3.19834
YDR473C	PRP3	TFIID	TATA-less			2.2704
YDR475C	JIP4	TFIID	TATA-less			2.90062
YDR476C	YDR476C	TFIID	TATA-containing			7.98806
YDR477W	SNF1	TFIID	TATA-less	20044.2	3210.7	2.47486
YDR478W	SNM1	TFIID	TATA-less			2.81982
YDR479C	PEX29	TFIID	TATA-less			3.67734
YDR480W	DIG2	TFIID	TATA-less			2.48663
YDR481C	PHO8	TFIID	TATA-containing			4.32528
YDR482C
YDR483W	KRE2	TFIID	TATA-less	9955.2	2511.8	3.89205
YDR484W	VPS52	TFIID	TATA-less			2.01381
YDR485C	VPS72	TFIID				2.00754
YDR486C	VPS60	TFIID	TATA-less			2.98975
YDR487C	RIB3	CR	TATA-containing			2.62627
YDR488C	PAC11	TFIID	TATA-less			2.16005
YDR489W	SLD5	TFIID	TATA-less			3.07203
YDR490C	PKH1	TFIID	TATA-less			3.18075
YDR492W	IZH1	CR	TATA-containing			1.99595
YDR493W	MZM1	TFIID	TATA-less			3.21985
YDR494W	RSM28	TFIID	TATA-less			3.44907
YDR495C	VPS3	TFIID	TATA-less			1.64108
YDR496C	PUF6	TFIID	TATA-less	10134.9	2631.9	1.86543
YDR497C	ITR1	CR	TATA-containing			4.03268
YDR498C	SEC20	TFIID	TATA-less			1.84198
YDR499W	LCD1	TFIID	TATA-less	10671.5	2718.5	1.90964
YDR500C	RPL37B	TFIID	TATA-less	13942.6	3846.1	3.00569
YDR501W	PLM2	TFIID				1.42559
YDR502C	SAM2	CR	TATA-less			2.73542
YDR503C	LPP1	TFIID	TATA-less			2.67902
YDR504C	SPG3	TFIID				0.516325
YDR505C	PSP1	TFIID				2.31455
YDR506C	GMC1	TFIID	TATA-less			3.35221
YDR507C	GIN4	TFIID	TATA-less			2.23919
YDR508C	GNP1	CR	TATA-containing			1.14023
YDR510W	SMT3	TFIID	TATA-less	16667.4	3829.4	4.55862
YDR511W	SDH7	TFIID	TATA-less	10219.6	2546.4	5.77226
YDR512C	EMI1	TFIID	TATA-less	7968.8	3043.8	4.67324
YDR513W	GRX2	CR	TATA-containing			2.71843
YDR514C	YDR514C	TFIID				3.26188
YDR515W	SLF1	TFIID				1.57192
YDR516C	EMI2	TFIID	TATA-containing			4.79651
YDR517W	GRH1	TFIID	TATA-less			5.93457
YDR518W	EUG1	TFIID	TATA-less			2.06682
YDR519W	FPR2	TFIID	TATA-less	9113.1	2538.9	3.43328
YDR520C	URC2	TFIID	TATA-less			2.29893
YDR522C
YDR523C
YDR524C	AGE1	TFIID	TATA-less	9794.7	2585.1	3.61008
YDR524C-B	YDR524C-B	CR	TATA-containing			2.32054
YDR524W-C
YDR525W-A	SNA2	TFIID	TATA-less	1939.5	2011.8	3.54361
YDR527W	RBA50	TFIID				1.75178
YDR528W	HLR1	CR	TATA-containing			0.84588
YDR529C	QCR7	TFIID	TATA-less			3.00278
YDR530C	APA2	TFIID	TATA-less			3.42425
YDR531W	CAB1	TFIID	TATA-less			2.43232
YDR532C	KRE28	TFIID	TATA-less	8261.9	2938.3	3.06403
YDR533C	HSP31	CR	TATA-containing			2.31519
YDR534C	FIT1	CR	TATA-less			1.26285
YDR536W
YDR538W	PAD1	TFIID				2.77963
YDR539W	FDC1	TFIID	TATA-less			1.97841
YDR540C
YDR541C	YDR541C	TFIID				2.33982
YDR542W
YDR545W
YEL001C	IRC22	TFIID	TATA-less			4.0816
YEL002C	WBP1	TFIID	TATA-less			2.45567
YEL003W	GIM4	TFIID	TATA-less	9567.2	3207.2	2.51627
YEL004W	YEA4	TFIID				3.03251
YEL005C	VAB2	TFIID				3.40799
YEL006W	YEA6	TFIID	TATA-containing	7863.1	2808.2	2.92971
YEL007W	MIT1	CR	TATA-less			1.76909
YEL009C	GCN4	CR				1.00194
YEL011W	GLC3	CR				2.32495
YEL012W	UBC8	TFIID	TATA-less			1.57237
YEL013W	VAC8	TFIID	TATA-less	12484.4	2716.7	1.75398
YEL015W	EDC3	TFIID	TATA-less			3.34738
YEL016C	NPP2	TFIID				2.81662
YEL017C-A	PMP2	CR	TATA-less			2.26788
YEL017W	GTT3	TFIID	TATA-less			3.48914
YEL018W	EAF5	TFIID	TATA-less	9132	2426.5	3.41807
YEL019C	MMS21	TFIID		9132	2426.5	2.41305
YEL020C	YEL020C	TFIID				1.13084
YEL020W-A	TIM9	TFIID	TATA-containing	4424.6	999.7	4.95958
YEL021W
YEL022W	GEA2	TFIID	TATA-less			2.84864
YEL023C	YEL023C	TFIID		10258.6	3343.4	3.03773
YEL024W	RIP1	TFIID	TATA-less			2.42809
YEL025C	YEL025C	TFIID	TATA-less			2.76375
YEL026W	SNU13	TFIID	TATA-less	8436.5	2655.3	3.3677
YEL027W	VMA3	TFIID	TATA-less	11632.1	3431.3	3.3007
YEL029C	BUD16	TFIID	TATA-less			3.44931
YEL030W
YEL031W	SPF1	TFIID	TATA-less	14685.7	3491.3	4.27013
YEL032W	MCM3	TFIID	TATA-less			3.67953
YEL033W	MTC7	CR				1.62504
YEL034W	HYP2	CR	TATA-containing			2.74213
YEL035C
YEL036C	ANP1	TFIID	TATA-less			3.20732
YEL037C	RAD23	TFIID	TATA-less			4.04048
YEL038W	UTR4	TFIID	TATA-less			2.65343
YEL039C
YEL040W	UTR2	CR	TATA-containing			1.46869
YEL041W
YEL042W	GDA1	TFIID	TATA-less			2.00629
YEL043W	YEL043W	TFIID	TATA-less			3.81998
YEL044W	IES6	TFIID	TATA-less			4.43595
YEL046C	GLY1	CR	TATA-containing			2.68836
YEL047C	FRD1	TFIID	TATA-containing			4.31088
YEL048C	TCA17	TFIID	TATA-less	8240.4	2788.7	3.05211
YEL049W
YEL050C	RML2	TFIID	TATA-less	10689.1	2754.4	3.82972
YEL051W	VMA8	TFIID	TATA-less	12667	3709.4	3.49608
YEL052W	AFG1	TFIID	TATA-less			4.59739
YEL053C	MAK10	TFIID	TATA-less			4.19642
YEL054C	RPL12A	TFIID	TATA-less	17741	4216.8	4.16301
YEL055C	POL5	TFIID		13615.3	3927.2	4.17805
YEL056W	HAT2	TFIID	TATA-less	14240.1	3885	4.44067
YEL057C
YEL058W	PCM1	TFIID	TATA-less			4.79744
YEL059C-A
YEL060C	PRB1	CR	TATA-containing			2.04087
YEL061C	CIN8	TFIID	TATA-less	12095.7	2923.9	2.18723
YEL062W	NPR2	TFIID	TATA-less			3.46841
YEL063C	CAN1	TFIID	TATA-less			2.29192
YEL064C	AVT2	TFIID				2.00127
YEL065W	SIT1	CR	TATA-containing			2.50396
YEL066W
YEL067C
YEL068C	YEL068C	TFIID	TATA-less	10902.7	3478.9	4.07337
YEL069C
YEL070W
YEL071W	DLD3	CR	TATA-containing			3.36496
YEL072W	RMD6	TFIID	TATA-less			2.415
YEL073C
YEL075C
YEL076C
YEL076C-A
YEL077C
YER001W	MNN1	CR	TATA-containing			3.6307
YER002W	NOP16	TFIID	TATA-less			1.85385
YER003C	PMI40	TFIID	TATA-less			1.90267
YER004W	FMP52	TFIID	TATA-less	14533	3728.9	7.44609
YER005W	YND1	TFIID	TATA-containing			2.88376
YER006W	NUG1	TFIID	TATA-less			2.54779
YER007C-A	TMA20	TFIID	TATA-less	9077.2	2479.3	3.87791
YER007W	PAC2	TFIID				3.28353
YER008C	SEC3	TFIID	TATA-less			5.01753
YER009W	NTF2	TFIID		14522.2	3461	4.65938
YER010C	YER010C	TFIID	TATA-less			4.1289
YER011W
YER012W	PRE1	TFIID	TATA-less	11475.6	3405.4	3.84785
YER013W	PRP22	TFIID	TATA-less			3.40341
YER014C-A
YER014W	HEM14	TFIID				2.37221
YER015W
YER016W	BIM1	TFIID	TATA-less	12332.4	2934.5	3.47708
YER017C	AFG3	TFIID	TATA-less			3.31965
YER018C	SPC25	TFIID	TATA-less	19623.8	4413.3	6.05497
YER019C-A	SBH2	TFIID	TATA-less	14326.2	3961.4	6.99995
YER019W	ISC1	TFIID	TATA-less			4.17708
YER020W	GPA2	TFIID	TATA-containing			4.41946
YER021W	RPN3	TFIID	TATA-less	20161.8	3927.2	4.55187
YER022W	SRB4	TFIID	TATA-less	10608.5	2382.8	2.99614
YER023W	PRO3	TFIID	TATA-less	21828.2	3818.5	4.2352
YER024W	YAT2	TFIID				0.90651
YER025W	GCD11	TFIID	TATA-less	19231.9	4659.3	5.74749
YER026C	CHO1	CR	TATA-containing			1.94081
YER027C	GAL83	TFIID	TATA-less			3.19512
YER028C	MIG3	CR	TATA-containing			3.1784
YER029C	SMB1	TFIID	TATA-less			2.25974
YER030W	CHZ1	TFIID				2.39523
YER031C	YPT31	TFIID	TATA-less	21748.5	3772.4	4.14912
YER032W	FIR1	TFIID	TATA-less			4.13329
YER033C	ZRG8	TFIID	TATA-less			2.54438
YER034W	YER034W	TFIID				2.28952
YER035W	EDC2	CR	TATA-containing			1.73854
YER036C	ARB1	TFIID	TATA-containing	10638	2953	4.11759
YER037W
YER038C	KRE29	TFIID				3.17833
YER038W-A
YER039C
YER039C-A	YER039C-A	TFIID				2.62013
YER040W	GLN3	TFIID	TATA-less			4.193
YER041W	YEN1	TFIID		6874.1	1582	2.13523
YER042W	MXR1	CR	TATA-containing			2.10117
YER043C	SAH1	CR	TATA-less	11308.7	3217.2	5.04551
YER044C	ERG28	CR	TATA-containing			3.14184
YER044C-A
YER045C
YER046W	SPO73	TFIID				3.73282
YER047C	SAP1	TFIID	TATA-less			1.21297
YER048C	CAJ1	TFIID	TATA-less			4.23956
YER048W-A	ISD11	TFIID	TATA-less			2.16508
YER049W	TPA1	TFIID	TATA-less			2.13653
YER050C	RSM18	TFIID	TATA-less	8225.3	2284.2	2.70335
YER051W	JHD1	TFIID	TATA-less			2.89556
YER052C	HOM3	CR	TATA-containing			2.74659
YER053C	PIC2	CR	TATA-less			2.13391
YER053C-A
YER054C
YER055C	HIS1	CR	TATA-less			3.30423
YER056C	FCY2	CR	TATA-containing			1.65651
YER056C-A	RPL34A	TFIID	TATA-less	21384.3	4847.9	4.61167
YER057C	HMF1	TFIID	TATA-less			4.19552
YER058W
YER059W	PCL6	TFIID	TATA-less			2.3067
YER060W	FCY21	TFIID	TATA-containing			2.31655
YER060W-A
YER061C	CEM1	TFIID	TATA-less			2.54652
YER062C	GPP2	CR	TATA-containing			2.35947
YER063W	THO1	TFIID	TATA-less	9730.1	2978.7	3.72717
YER064C	VHR2	CR	TATA-containing			0.95885
YER065C	ICL1	TFIID	TATA-less			2.94135
YER066W
YER067W	RGI1	CR				1.79425
YER068W	MOT2	TFIID	TATA-less			2.09847
YER069W	ARG5,6	CR	TATA-less			2.8463
YER070W	RNR1	CR	TATA-containing			2.68095
YER071C	TDA2	TFIID	TATA-less	10041.4	2996.8	4.59577
YER072W	VTC1	CR	TATA-less	12422.7	4549.5	5.7849
YER073W	ALD5	CR	TATA-containing			1.79154
YER074W	RPS24A	TFIID	TATA-less	17083.1	4153.8	3.67844
YER074W-A	YOS1	TFIID	TATA-less	11649.3	2674.3	4.18041
YER075C	PTP3	TFIID	TATA-less			3.80788
YER076C
YER077C	YER077C	TFIID	TATA-less			2.5335
YER078C	ICP55	TFIID				2.91874
YER078W-A
YER079W	YER079W	TFIID	TATA-less			2.00862
YER080W	AIM9	TFIID	TATA-less			3.95851
YER081W	SER3	CR	TATA-containing			0.990235
YER082C	UTP7	TFIID	TATA-less			2.49792
YER083C	GET2	TFIID	TATA-less	12555.5	3451.7	3.86684
YER084W				12555.5	3451.7
YER085C
YER086W	ILV1	TFIID	TATA-less			2.47552
YER087C-B	SBH1	TFIID	TATA-less	22418.4	3935	4.48986
YER087W	AIM10	TFIID	TATA-less			2.73493
YER088C	DOT6	TFIID	TATA-less			5.79284
YER089C	PTC2	TFIID	TATA-less			2.27043
YER090W	TRP2	TFIID	TATA-less	9102.7	2340.1	2.9658
YER091C	MET6	CR	TATA-containing			1.38911
YER092W	IES5	TFIID	TATA-containing			3.62665
YER093C	TSC11	TFIID	TATA-less	9870.9	2762.3	3.65368
YER093C-A	AIM11	TFIID				4.09998
YER094C	PUP3	TFIID	TATA-less	23900.1	4634.3	5.92739
YER095W	RAD51	TFIID				4.11405
YER096W
YER098W	UBP9	TFIID				2.34581
YER099C	PRS2	TFIID		22644.7	3548.8	4.94754
YER100W	UBC6	TFIID	TATA-less			3.55514
YER101C	AST2	TFIID	TATA-less			3.5222
YER102W	RPS8B	TFIID	TATA-less			1.0596
YER103W	SSA4	TFIID	TATA-less			2.31296
YER104W	RTT105	TFIID	TATA-less			3.08455
YER105C	NUP157	TFIID	TATA-containing	8018.9	2599.8	2.29922
YER106W
YER107C	GLE2	TFIID		8325.4	2628.6	2.63127
YER109C
YER110C	KAP123	TFIID	TATA-less	11701.8	2445.7	2.29173
YER111C	SWI4	TFIID	TATA-less			0.987065
YER112W	LSM4	TFIID	TATA-less			2.0447
YER113C	TMN3	TFIID	TATA-less	8465.3	2647.1	4.3918
YER114C	BOI2	TFIID	TATA-less			1.51085
YER115C	SPR6	TFIID				1.85195
YER116C	SLX8	TFIID	TATA-less			2.2041
YER117W	RPL23B	TFIID	TATA-less	17989.6	3347.9	3.30472
YER118C	SHO1	TFIID	TATA-containing			3.05675
YER119C	AVT6	TFIID	TATA-less			5.30068
YER120W	SCS2	TFIID	TATA-less	14097	3260.6	5.40132
YER121W
YER122C	GLO3	TFIID	TATA-containing	17244	2938.6	3.12613
YER123W	YCK3	TFIID	TATA-less			2.4157
YER124C	DSE1	CR	TATA-containing			1.28169
YER125W	RSP5	TFIID		13362.8	2962.9	2.8841
YER126C	NSA2	TFIID	TATA-less	14928.9	2982.6	4.67221
YER127W	LCP5	TFIID	TATA-less			2.59957
YER128W
YER129W	SAK1	TFIID				3.02219
YER130C	COM2	CR	TATA-containing	13310.1	3445.3	4.79078
YER131W	RPS26B	TFIID	TATA-less	10512	3491.5	3.27003
YER132C	PMD1	TFIID	TATA-less	8029.4	2486.3	4.10752
YER133W	GLC7	TFIID	TATA-less	10781	2932	3.12252
YER134C	YER134C	TFIID	TATA-less	11743.6	3464.4	5.00998
YER136W	GDI1	TFIID	TATA-less			4.0036
YER137C				8753.9	3317.5
YER137C-A
YER138C
YER138W-A	YER138W-A	CR				1.44443
YER139C	RTR1	TFIID				2.28475
YER140W	EMP65	TFIID				2.33373
YER141W	COX15	TFIID	TATA-less			2.1458
YER142C	MAG1	TFIID	TATA-less
YER143W	DDI1	TFIID				3.45716
YER144C	UBP5	TFIID	TATA-less			4.99468
YER145C	FTR1	CR	TATA-containing			3.64687
YER146W	LSM5	TFIID	TATA-less	12543.5	4081.4	5.09028
YER147C	SCC4	TFIID				2.81236
YER148W	SPT15	TFIID	TATA-less	9075	2795.2	2.35396
YER149C	PEA2	TFIID	TATA-less			3.65011
YER150W	SPI1	CR	TATA-containing			3.00377
YER151C	UBP3	TFIID	TATA-less			2.81616
YER152C	YER152C	TFIID				4.57447
YER153C
YER154W	OXA1	TFIID	TATA-less	10790.3	3179.9	7.39309
YER155C	BEM2	TFIID	TATA-less			4.393
YER156C	YER156C	TFIID	TATA-less	9791.7	3134.6	3.9861
YER157W	COG3	TFIID	TATA-less	15845	3381.5	4.96032
YER158C
YER159C	BUR6	CR	TATA-less			0.71351
YER159C-A
YER160C
YER161C	SPT2	TFIID	TATA-less			2.2003
YER162C	RAD4	TFIID	TATA-less			2.85451
YER163C
YER164W	CHD1	TFIID	TATA-less			2.84224
YER165W	PAB1	TFIID				2.14901
YER166W	DNF1	TFIID	TATA-less			2.67442
YER167W	BCK2	TFIID	TATA-less			3.02751
YER168C	CCA1	TFIID	TATA-less	10475.7	3172.4	3.81683
YER169W	RPH1	TFIID	TATA-less			1.72407
YER170W	ADK2	TFIID	TATA-less			3.24104
YER171W	RAD3	TFIID	TATA-containing			2.10373
YER172C	BRR2	TFIID	TATA-less			2.94366
YER173W	RAD24	TFIID		12766.5	2251.6	3.9587
YER174C	GRX4	TFIID	TATA-less	12094.8	2240.3	2.73188
YER175C	TMT1	TFIID				2.31081
YER175W-A	YER175W-A	TFIID				1.42815
YER176W	ECM32	TFIID	TATA-less	8134.1	2628.4	2.8417
YER177W	BMH1	CR	TATA-less			2.97036
YER178W	PDA1	TFIID	TATA-less			4.64053
YER179W
YER180C	ISC10	TFIID				1.19129
YER180C-A	SLO1	TFIID	TATA-less	11117.1	3088.9	4.53041
YER182W	FMP10	TFIID		10010.7	2218	3.67589
YER183C	FAU1	TFIID	TATA-containing			2.63842
YER184C	TOG1	TFIID	TATA-less	10070.3	3090.6	3.29794
YER185W
YER186C	YER186C	TFIID		8519.7	3086.5	3.76673
YER187W
YER188C-A
YER189W
YER190W
YFL001W	DEG1	TFIID		11930	3410.3	4.6675
YFL002C	SPB4	TFIID		11930	3410.3	4.97178
YFL002W-A
YFL002W-B
YFL003C
YFL004W	VTC2	CR	TATA-less			4.83011
YFL005W	SEC4	TFIID	TATA-less	27215.8	2967.6	3.88395
YFL007W	BLM10	TFIID	TATA-less	11934.1	3257.8	1.97579
YFL008W	SMC1	TFIID	TATA-less			2.81105
YFL009W	CDC4	TFIID	TATA-less	9294.8	2464.2	3.37392
YFL010C	WWM1	TFIID	TATA-less			3.80024
YFL010W-A
YFL011W
YFL012W
YFL013C	IES1	TFIID	TATA-less	11866.3	3257.1	4.86894
YFL014W
YFL016C	MDJ1	TFIID	TATA-less			2.4509
YFL017C	GNA1	TFIID	TATA-containing	11716.6	3210.9	3.71269
YFL017W-A	SMX2	TFIID	TATA-less			5.48311
YFL018C	LPD1	TFIID	TATA-containing	9924.9	2649	3.57774
YFL020C
YFL021W	GAT1	CR	TATA-containing			2.30613
YFL022C	FRS2	TFIID	TATA-less	8187.2	2079.2	4.22889
YFL023W	BUD27	TFIID	TATA-less			2.08608
YFL024C	EPL1	TFIID	TATA-less	8847.4	2402.9	6.43356
YFL025C	BST1	TFIID	TATA-less			2.833
YFL026W
YFL027C	GYP8	TFIID	TATA-less			2.86082
YFL028C	CAF16	TFIID	TATA-less			2.85846
YFL029C	CAK1	TFIID	TATA-less			3.41366
YFL030W
YFL031W	HAC1	CR	TATA-less			3.5968
YFL033C	RIM15	TFIID	TATA-less			3.04944
YFL034C-A	RPL22B	TFIID	TATA-less	15507.3	3043.2	2.90686
YFL034C-B	MOB2	TFIID	TATA-less			2.6026
YFL034W	YFL034W	TFIID	TATA-less			3.49561
YFL036W	RPO41	TFIID	TATA-less			1.95303
YFL037W	TUB2	TFIID	TATA-less	15692.2	3084.9	2.98339
YFL038C	YPT1	TFIID	TATA-less			4.21706
YFL039C	ACT1	TFIID	TATA-less	9004.2	2697.2	3.51541
YFL040W
YFL041W	FET5	TFIID	TATA-containing			3.31595
YFL041W-A
YFL042C	YFL042C	TFIID	TATA-less			3.48439
YFL044C	OTU1	TFIID	TATA-less	15335.9	3023.1	6.01328
YFL045C	SEC53	TFIID	TATA-less			2.95714
YFL046W	FMP32	TFIID				3.36987
YFL047W	RGD2	TFIID	TATA-less	16004.5	2741.8	5.07972
YFL048C	EMP47	TFIID	TATA-less			2.97537
YFL049W	SWP82	TFIID	TATA-containing			2.49439
YFL050C	ALR2	TFIID		9823.6	2169.9	2.57985
YFL051C
YFL052W
YFL053W
YFL054C
YFL055W
YFL058W
YFL059W
YFL060C
YFL061W
YFL062W
YFL064C
YFL065C
YFL066C
YFR001W	LOC1	TFIID	TATA-less			2.99557
YFR002W	NIC96	TFIID	TATA-less	12544.5	3035.6	3.27554
YFR003C	YPI1	TFIID				7.43587
YFR004W	RPN11	TFIID	TATA-less	22893.2	3933.2	7.35297
YFR005C	SAD1	TFIID	TATA-less			2.69193
YFR006W	YFR006W	TFIID				2.76244
YFR007W	YFH7	TFIID	TATA-less			3.80375
YFR008W	FAR7	TFIID	TATA-less			3.93309
YFR009W	GCN20	TFIID	TATA-less			3.71156
YFR010W	UBP6	TFIID	TATA-containing	12341.7	2888	3.23237
YFR011C	MIC19	TFIID	TATA-less	22749.4	2885.1	5.1042
YFR012W
YFR012W-A
YFR013W	IOC3	TFIID	TATA-less	12421.6	3177.1	3.69938
YFR014C	CMK1	TFIID				1.53669
YFR015C	GSY1	CR	TATA-containing			2.59855
YFR016C	YFR016C	TFIID	TATA-less			3.15038
YFR017C
YFR018C				11786.5	3391.6
YFR019W	FAB1	TFIID		11170.7	3182.5	4.5375
YFR020W	YFR020W	TFIID				2.66637
YFR021W	ATG18	TFIID	TATA-less			3.07735
YFR022W
YFR023W
YFR024C-A	LSB3	TFIID	TATA-less			3.8235
YFR025C	HIS2	TFIID	TATA-less	11683.7	3816.9	7.02868
YFR026C
YFR027W	ECO1	TFIID				2.43613
YFR028C	CDC14	TFIID	TATA-less			3.57383
YFR029W	PTR3	TFIID	TATA-less			5.44242
YFR030W	MET10	TFIID	TATA-containing			2.77702
YFR031C	SMC2	TFIID	TATA-less	9964.5	3104.8	4.40445
YFR031C-A	RPL2A	TFIID	TATA-less	13868.4	3321.8	3.92659
YFR032C
YFR032C-A	RPL29	TFIID	TATA-less	12930.7	3302	3.31652
YFR032C-B	YFR032C-B	TFIID				0.399665
YFR033C	QCR6	CR	TATA-less			2.58405
YFR034C	PHO4	CR	TATA-less			5.07354
YFR035C
YFR036W
YFR037C	RSC8	TFIID	TATA-less	12729.2	3570.4	4.98093
YFR038W	IRC5	TFIID	TATA-less			4.35013
YFR039C	OSW7	TFIID	TATA-less			2.49184
YFR040W	SAP155	TFIID	TATA-less	14302.9	2497.2	3.07276
YFR041C	ERJ5	TFIID	TATA-less			2.23935
YFR042W	KEG1	TFIID	TATA-less			2.25636
YFR043C	IRC6	TFIID		8718.8	2374.9	2.79901
YFR044C	DUG1	TFIID	TATA-less	10811.2	2706.7	3.73159
YFR045W	YFR045W	TFIID				3.90544
YFR046C	CNN1	TFIID				3.80832
YFR047C	BNA6	TFIID				3.67758
YFR048W	RMD8	TFIID	TATA-less	11514.3	2682.4	3.76268
YFR049W	YMR31	TFIID	TATA-less			2.98002
YFR050C	PRE4	TFIID	TATA-less	25080.1	4231.5	4.17593
YFR051C	RET2	TFIID	TATA-less	15113.9	2739.5	3.80007
YFR052W	RPN12	TFIID	TATA-less	17711.6	3999	5.52275
YFR053C	HXK1	CR	TATA-containing			2.15273
YFR055W	IRC7	TFIID	TATA-containing			2.46912
YFR057W
YGL001C	ERG26	TFIID	TATA-containing			2.32337
YGL002W	ERP6	TFIID				4.76059
YGL003C	CDH1	TFIID		11119.5	3397.6	3.55543
YGL004C	RPN14	TFIID	TATA-less			3.4797
YGL005C	COG7	TFIID	TATA-less			3.17712
YGL006W	PMC1	TFIID	TATA-less			1.78777
YGL006W-A
YGL007C-A	YGL007C-A	TFIID
YGL008C	PMA1	CR	TATA-containing			0.28996
YGL009C	LEU1	TFIID	TATA-less			3.11033
YGL010W	MPO1	TFIID	TATA-less			3.49434
YGL011C	SCL1	TFIID	TATA-less	26258.4	3669.1	6.48512
YGL012W	ERG4	CR	TATA-containing			4.6487
YGL013C	PDR1	TFIID	TATA-less			4.83443
YGL014W	PUF4	TFIID	TATA-less	8419.7	1340.4	1.53219
YGL015C
YGL016W	KAP122	TFIID	TATA-less	10831.8	3027.9	4.11868
YGL017W	ATE1	TFIID				4.10661
YGL018C	JAC1	TFIID				3.32664
YGL019W	CKB1	TFIID		10293.6	2429.5	4.16713
YGL020C	GET1	TFIID		10293.6	2429.5	3.80701
YGL021W	ALK1	TFIID	TATA-less	8902.7	2585.4	3.52862
YGL022W	STT3	TFIID	TATA-less	18792.7	4184	5.7264
YGL023C	PIB2	TFIID	TATA-less			4.4204
YGL025C	PGD1	TFIID	TATA-less			3.76667
YGL026C	TRP5	TFIID	TATA-less			2.85796
YGL027C	CWH41	TFIID	TATA-less			3.52864
YGL028C	SCW11	CR	TATA-less			1.68681
YGL029W	CGR1	TFIID	TATA-less			3.17668
YGL030W	RPL30	TFIID	TATA-less	14954.1	3237.6	3.77373
YGL031C	RPL24A	TFIID				0.99837
YGL032C
YGL033W
YGL035C	MIG1	TFIID	TATA-less			3.59611
YGL036W	YGL036W	TFIID				2.30687
YGL037C	PNC1	CR	TATA-containing			1.71691
YGL038C	OCH1	CR	TATA-less			2.35203
YGL039W	YGL039W	TFIID	TATA-less			2.95675
YGL040C	HEM2	TFIID	TATA-containing			3.1469
YGL041C-B
YGL041W-A	YGL041W-A	TFIID	TATA-less			4.17898
YGL043W	DST1	TFIID	TATA-less			2.65672
YGL044C	RNA15	TFIID	TATA-less			2.77527
YGL045W	RIM8	TFIID				3.4348
YGL047W	ALG13	TFIID				2.75338
YGL048C	RPT6	TFIID	TATA-less	11210.1	3114.3	4.07146
YGL049C	TIF4632	TFIID	TATA-less			2.32251
YGL050W	TYW3	TFIID	TATA-less			5.23382
YGL051W
YGL053W
YGL054C	ERV14	TFIID				2.61719
YGL055W	OLE1	CR	TATA-containing			3.9558
YGL056C	SDS23	TFIID	TATA-less			2.76643
YGL057C	GEP7	TFIID	TATA-less			3.76248
YGL058W	RAD6	TFIID	TATA-less			2.82534
YGL059W	PKP2	TFIID				1.68091
YGL060W	YBP2	TFIID				3.27258
YGL061C	DUO1	TFIID		7882.6	2430.8	2.40985
YGL062W	PYC1	CR				3.62881
YGL063W				8923.3	2893.1
YGL064C	MRH4	TFIID	TATA-less			3.39769
YGL065C	ALG2	TFIID	TATA-less	9353	2922.3	2.72902
YGL066W	SGF73	TFIID	TATA-less			2.30823
YGL067W	NPY1	TFIID	TATA-less	8163.5	2385.2	3.65332
YGL068W	MNP1	TFIID	TATA-less	18657	3662.6	5.29399
YGL070C	RPB9	TFIID	TATA-less			4.73241
YGL071W	AFT1	TFIID	TATA-less			3.71676
YGL073W	HSF1	TFIID	TATA-less			4.1441
YGL075C	MPS2	TFIID	TATA-less			3.29606
YGL076C	RPL7A	TFIID	TATA-less	18624.3	3441	2.01332
YGL077C	HNM1	CR	TATA-containing			2.17697
YGL078C	DBP3	TFIID	TATA-less			2.85168
YGL079W	KXD1	TFIID	TATA-less			3.42542
YGL080W	MPC1	TFIID	TATA-less	9427.9	2338.3	4.41007
YGL081W
YGL082W	YGL082W	TFIID	TATA-less			3.7778
YGL083W	SCY1	TFIID	TATA-less			2.69518
YGL084C	GUP1	TFIID	TATA-less			3.29156
YGL085W	LCL3	TFIID	TATA-containing	10306.9	2248	2.72826
YGL086W	MAD1	TFIID	TATA-less	10060.6	3114.7	3.2664
YGL087C	MMS2	TFIID	TATA-less			3.03588
YGL089C	MF(ALPHA)2	CR				2.98532
YGL090W	LIF1	TFIID				3.7654
YGL091C	NBP35	TFIID				3.77088
YGL092W	NUP145	TFIID	TATA-less	8888.4	2761.4	2.7833
YGL093W	SPC105	TFIID	TATA-less			3.86646
YGL094C	PAN2	TFIID	TATA-less			1.53219
YGL095C	VPS45	TFIID	TATA-less			3.12138
YGL096W	TOS8	CR				1.90894
YGL097W	SRM1	TFIID	TATA-less	9126.1	2611.8	2.42698
YGL098W	USE1	TFIID	TATA-containing			3.58854
YGL099W	LSG1	TFIID	TATA-less			3.17794
YGL100W	SEH1	TFIID	TATA-less	10069.3	2883.6	3.47534
YGL101W	YGL101W	TFIID	TATA-containing			1.97402
YGL103W	RPL28	TFIID	TATA-less	14693.9	4272.3	3.23349
YGL104C
YGL105W	ARC1	TFIID	TATA-less	10992.1	2661.4	4.12047
YGL106W	MLC1	TFIID	TATA-less	21728.9	4278	6.66729
YGL107C	RMD9	TFIID	TATA-less			4.36979
YGL108C	YGL108C	TFIID	TATA-containing	10121.7	3293.1	3.76003
YGL110C	CUE3	TFIID	TATA-less			2.79317
YGL111W	NSA1	TFIID	TATA-less	10786.1	3142.3	3.64423
YGL112C	TAF6	TFIID		10991.7	3134.7	4.92837
YGL113W	SLD3	TFIID	TATA-less			2.67346
YGL114W	YGL114W	CR	TATA-less			3.69979
YGL115W	SNF4	TFIID	TATA-less	13218.5	2986.2	4.11354
YGL116W	CDC20	CR	TATA-less			2.0423
YGL117W	YGL117W	CR	TATA-containing			2.64653
YGL119W	COQ8	TFIID	TATA-less			4.30111
YGL120C	PRP43	TFIID	TATA-less			3.1029
YGL121C
YGL122C	NAB2	TFIID	TATA-less	17400.9	3300.9	4.28181
YGL123W	RPS2	TFIID	TATA-containing	15278	3396.2	4.06139
YGL124C	MON1	TFIID				4.5199
YGL125W	MET13	CR				2.78417
YGL126W				18231.3	3753.8
YGL127C	SOH1	TFIID	TATA-less	18231.3	3753.8	5.79787
YGL128C	CWC23	TFIID				4.3965
YGL129C	RSM23	TFIID	TATA-containing			2.70498
YGL130W	CEG1	TFIID	TATA-less			3.25776
YGL131C	SNT2	TFIID	TATA-containing			3.69891
YGL133W	ITC1	TFIID	TATA-less			1.51421
YGL134W	PCL10	TFIID	TATA-less			3.16084
YGL135W	RPL1B	TFIID	TATA-less	19080.2	4936.5	4.94335
YGL136C	MRM2	TFIID	TATA-less			3.21078
YGL137W	SEC27	TFIID	TATA-less	12548.4	3160.7	3.50159
YGL138C
YGL139W	FLC3	TFIID	TATA-less			2.37345
YGL140C	YGL140C	TFIID	TATA-less	10392.4	2841.7	3.16812
YGL141W	HUL5	TFIID				2.67305
YGL142C	GPI10	TFIID		8181.1	2814.6	3.21136
YGL143C	MRF1	TFIID	TATA-less			5.2771
YGL144C	ROG1	TFIID	TATA-less			3.1358
YGL145W	TIP20	TFIID	TATA-containing			1.69651
YGL146C
YGL147C	RPL9A	TFIID		11977.7	3952.7	4.36547
YGL148W	ARO2	TFIID	TATA-less			5.05896
YGL150C	INO80	TFIID	TATA-less			5.92746
YGL151W	NUT1	TFIID	TATA-less	9749	2418.2	2.78554
YGL153W	PEX14	TFIID				1.71358
YGL154C	LYS5	TFIID	TATA-less			3.28917
YGL155W	CDC43	TFIID		9178.4	2231.3	3.3776
YGL156W
YGL157W	ARI1	CR	TATA-containing	7304.4	2528.1	2.92685
YGL158W
YGL159W	YGL159W	TFIID	TATA-less			2.48725
YGL160W	AIM14	TFIID				2.92952
YGL161C	YIP5	TFIID	TATA-less	13706.8	3260.8	3.62818
YGL162W	SUT1	TFIID	TATA-containing			3.03682
YGL163C	RAD54	TFIID	TATA-less			1.68378
YGL164C	YRB30	TFIID	TATA-less	9020.6	2286.6	3.70802
YGL166W	CUP2	TFIID	TATA-less			4.90219
YGL167C	PMR1	TFIID	TATA-less	10371.9	2806.4	3.95388
YGL168W
YGL169W	SUA5	TFIID	TATA-less	9230.9	2894.6	2.75949
YGL170C
YGL171W	ROK1	TFIID	TATA-less	9887.8	2310.2	3.11727
YGL172W	NUP49	TFIID	TATA-less			5.43478
YGL173C	XRN1	TFIID	TATA-less	17446.4	3389	3.97085
YGL174W	BUD13	TFIID				2.03301
YGL175C	SAE2	TFIID				2.14488
YGL176C	YGL176C	TFIID	TATA-less			1.65182
YGL178W	MPT5	TFIID	TATA-less			3.01138
YGL179C
YGL180W	ATG1	TFIID				0.709085
YGL181W	GTS1	TFIID	TATA-less			2.68381
YGL183C
YGL184C	STR3	CR				1.09394
YGL185C	YGL185C	TFIID	TATA-less			3.97817
YGL186C	TPN1	TFIID	TATA-containing			3.70124
YGL187C	COX4	TFIID	TATA-less	8786.1	2414.2	1.71185
YGL188C-A	YGL188C-A	TFIID		18637.9	3792.3	3.83376
YGL189C	RPS26A	TFIID	TATA-less			1.68693
YGL190C	CDC55	TFIID				2.20636
YGL191W	COX13	TFIID	TATA-less			3.0001
YGL192W
YGL193C
[truncated: 3,889 more rows]

## Sheet: 4C
gene_id	gene_name	class	TATA	Bdf1 Bdf2deg	Bdf2 Bdf1deg	Bdf1 Esa1deg	Taf1 Bdf12deg	Taf11 Bdf12deg	Med8 Bdf12deg	Med17 Bdf12deg	Spt3 Bdf12deg	Taf1 Med14deg	Med8 Taf13deg	Spt3 Med14deg	Spt7 Taf13deg
YAL001C	TFC3	TFIID		-0.0479328	0.0635982	-0.907138	-0.573352					-0.511293
YAL002W	VPS8	TFIID	TATA-less	0.0103199	-0.444481	-1.03834	-1.11954	-1.42392		-1.13027	-0.99374	-0.230933		0.0886135	-0.612758
YAL003W	EFB1	CR	TATA-less				-0.367408	-0.912602	-0.672825	-0.725621	-0.119457	-0.116355	-0.287355	-0.155718	-0.21903
YAL005C	SSA1	CR	TATA-containing				-0.652295		-0.609175	-0.876154	-0.49052	-0.195777	-0.193523	0.167234	-0.312403
YAL007C	ERP2	TFIID	TATA-less	-0.0794087	-0.0106037	-0.842291		-0.820198
YAL008W	FUN14	TFIID	TATA-less	0.153299	-0.0710274	-2.47039	-1.25907	-0.793944				-0.569106
YAL009W	SPO7	TFIID		0.161627	0.405704	-1.7364	-0.857997					-0.307862
YAL010C	MDM10	TFIID	TATA-less	0.161627	0.405704	-1.7364	-0.857997					-0.307862
YAL011W	SWC3	TFIID	TATA-less	-0.0850358	-0.250448	-1.65158					-0.0799751			0.461402	-0.544935
YAL012W	CYS3	CR	TATA-less	-0.0651807	-0.217026	-0.938073	-0.674806	-1.07719	-0.780053	-0.658182	-1.00785	-0.183742	-0.389404	0.310376	0.822305
YAL013W	DEP1	TFIID	TATA-less	0.0230537	0.00789783	-1.16227	-0.403585	-0.926477			0.245724	-0.205048		0.744498	-0.10094
YAL014C	SYN8	TFIID	TATA-less	0.0230537	0.00789783	-1.16227	-0.403585	-0.926477			0.245724	-0.205048		0.744498	-0.10094
YAL015C	NTG1	TFIID
YAL016W	TPD3	TFIID		-0.200529	0.548577	-0.862669		-0.889641
YAL017W	PSK1	TFIID		0.268825	0.486703	-0.614419	-0.881966	-0.820419			-1.14899	-0.111327		0.496791	-0.535505
YAL018C				0.268825	0.486703		-0.882448	-0.820419			-1.14899	-0.111327		0.496791	-0.535505
YAL019W	FUN30	TFIID	TATA-less
YAL020C
YAL021C	CCR4	TFIID	TATA-less	-0.0538227	0.741516	-1.39191
YAL022C	FUN26	TFIID	TATA-less		0.244021
YAL023C	PMT2	TFIID	TATA-less		0.253161		-0.338107					-0.207871
YAL024C	LTE1	TFIID	TATA-less
YAL025C	MAK16	TFIID	TATA-less
YAL026C	DRS2	TFIID	TATA-less	-0.158338	0.0109619	-1.62342
YAL027W	SAW1	TFIID	TATA-containing	0.0796932	0.606598	-2.15352
YAL028W	FRT2	TFIID	TATA-less	-0.110306	-0.448079	-1.21704		-1.40094
YAL029C	MYO4	TFIID	TATA-less	-0.0859881	-0.173953	-1.08335	-0.663632	-1.18662				-0.264452
YAL030W	SNC1	TFIID		-0.000687992	-0.00383852	-1.16559	-1.22768	-1.39245			-0.0849045	-0.234187		1.48378	-0.314038
YAL031C	GIP4	TFIID	TATA-less	-0.000687992	-0.00383852	-1.16559	-1.22768	-1.39245			-0.0849045	-0.234187		1.48378	-0.314038
YAL032C	PRP45	TFIID	TATA-less	-0.17722	0.05724	-1.58437
YAL033W	POP5	TFIID		0.116737	0.325913	-1.40372	-0.677408					-0.239477
YAL034C	FUN19	TFIID		0.125708		-0.869605	-0.543944	-0.454774		-0.350353	0.271147	-0.0684332		0.79389	-0.0434696
YAL034W-A	MTW1	TFIID	TATA-less
YAL035W	FUN12	TFIID	TATA-less		0.635831
YAL036C	RBG1	TFIID	TATA-less		0.639517
YAL037C-A
YAL037W
YAL038W	CDC19	CR	TATA-less				-0.479649	-1.0788	-0.0318687	-0.15799		0.0354767	-0.169584
YAL039C	CYC3	TFIID	TATA-less				-0.866119	-1.1939		-1.06101	-0.661658	-0.191207		0.580285	-0.258113
YAL040C	CLN3	CR	TATA-less				-0.712022	-0.968907	-1.1253	-0.769212	-0.549639	-0.00954203	-0.244923	0.308679	0.16526
YAL041W	CDC24	TFIID	TATA-less	-0.151526	0.27227	-1.06745	-0.247631	-1.11438				-0.134276
YAL042W	ERV46	TFIID	TATA-less	0.0194766	0.241387	-0.871123	-0.692793	-1.29103			0.290926	-0.244045		0.82005	0.052114
YAL043C	PTA1	TFIID	TATA-less	0.0194766	0.241387	-0.871123	-0.69084	-1.29103			0.290926	-0.243835		0.82005	0.052114
YAL044C	GCV3	TFIID	TATA-containing	-0.110599	-0.603212	-1.62408	-1.27428	-0.698574		-0.532905	-0.534306	-0.746639		0.301173	-1.2371
YAL044W-A	YAL044W-A	TFIID		0.168563	0.269858	-2.31892	-1.19772					-0.608997
YAL046C	AIM1	TFIID	TATA-containing	0.169021	0.166447	-2.27754	-1.22687					-0.646103
YAL047C	SPC72	TFIID	TATA-containing	0.131758		-2.12862	-1.05115					-0.372468
YAL048C	GEM1	TFIID		-0.00250679	0.402395	-2.45804
YAL049C	AIM2	TFIID	TATA-less	0.0478274	0.546018	-1.35271
YAL051W	OAF1	TFIID	TATA-less	-0.118096	0.0253322	-1.03081	-0.744452				-0.406477	-0.356749		0.720855	-0.83212
YAL053W	FLC2	TFIID	TATA-less	0.0339178	-0.232816	-0.518689	-0.743595	-0.728511	-0.440639	-0.54049	-0.294926	-0.287136	-0.196013	-0.0610102	-0.0024741
YAL054C					-0.210834		-0.581899	-0.793594	-0.613254	-0.839351	-0.682426	-0.543066	-0.228536	0.251728	-0.691343
YAL055W				-0.0231071	0.311106
YAL056W	GPB2	TFIID	TATA-less	-0.0339414	0.462238	-0.829266
YAL058W	CNE1	TFIID	TATA-less
YAL059W	ECM1	TFIID
YAL060W	BDH1	CR	TATA-containing	0.0924082	-0.0861208	-2.83782	-1.27348	-0.824986		-1.51854	-1.40117	-0.654143		-0.425743	-1.0547
YAL061W								-1.53156	-1.05944	-1.51703	-1.04058		-0.20257	-0.121651	-0.581431
YAL062W				-0.203465	-0.492802		-1.13944		-0.922451			-0.437278	-0.420316
YAL063C
YAL063C-A
YAL064C-A
YAL064W
YAL064W-B
YAL065C
YAL067C
YAL067W-A
YAL068C
YAR002C-A	ERP1	TFIID	TATA-less	0.0956134	0.509351	-0.936873	-0.553321	-0.830367				-0.295641
YAR002W	NUP60	TFIID	TATA-less	-0.0863972	0.0821019	-0.570303	-0.326779					-0.464135
YAR003W	SWD1	TFIID	TATA-containing	0.0956134	0.509351	-0.936873	-0.553321	-0.83183				-0.295641
YAR007C	RFA1	TFIID	TATA-less	-0.302812	0.374632	-0.81114
YAR008W	SEN34	TFIID		-0.302812	0.374203	-0.81114
YAR009C
YAR010C									-0.571298	-0.389006	-0.485819		-0.27551	-0.370516	0.580118
YAR014C	BUD14	TFIID	TATA-less	-0.127242	0.415545	-1.00643
YAR015W	ADE1	TFIID	TATA-containing	-0.127242	0.38915	-1.00643
YAR018C	KIN3	TFIID	TATA-less
YAR019C	CDC15	TFIID	TATA-less	0.0602344	0.709424	-1.99741
YAR020C
YAR023C				0.118269	0.0677374
YAR027W	UIP3	TFIID		0.0466917	-0.174756	-1.81876	-1.17579	-1.18894	-0.561476	-0.548527	-0.123206	-0.440558	-0.31021	-0.242702	-0.337381
YAR028W	YAR028W	TFIID	TATA-less
YAR029W
YAR031W
YAR033W				-0.0196152
YAR035C-A				0.110619	0.0253659		-0.558919					-0.298406
YAR035W
YAR042W	SWH1	TFIID	TATA-less	0.110619	0.0253659	-1.51019	-0.558919					-0.298406
YAR050W
YAR064W
YAR066W
YAR068W
YAR071W											-1.45157			-0.100174	-0.339747
YBL001C	ECM15	TFIID		-0.124838	-0.468505	-0.870675		-1.30596			-0.806603			0.232355	-0.660549
YBL002W	HTB2	CR	TATA-containing		-0.449865				-0.458543	-0.874382	-0.49768		-0.174078	0.315716	0.238759
YBL003C	HTA2	CR	TATA-containing	0.141809	-0.146655	-0.460738	-0.286362		-0.458167	-0.946449	-0.653864	-0.232895	-0.21695	0.269897	0.0901879
YBL004W	UTP20	TFIID	TATA-less	-0.0669851	0.172016	-0.299507	-0.925778	-0.541872	-0.560395	-0.301127	0.0735532	-0.507766	-0.228741	0.28172	-0.0111429
YBL005W	PDR3	TFIID	TATA-less	-0.177196	-0.18609	-1.64908	-0.854987	-0.9034			-0.3353	-0.36591		0.48249	0.503494
YBL005W-A				-0.00861254			-0.629651		-0.922672	-0.63942	-0.755517	-0.506569	-0.379098	0.45729	1.08484
YBL005W-B				-0.00861254			-0.629651		-0.922672	-0.63942	-0.755517	-0.506569	-0.379098	0.45729	1.08484
YBL006C	LDB7	TFIID	TATA-less	-0.177196	-0.18609	-1.64908		-0.9034			-0.3353			0.48249	0.503494
YBL007C	SLA1	TFIID	TATA-less	0.081819	0.0308323	-0.941573	0.188107	-0.753824		-0.334271	0.266074	-0.052066		0.558741	-0.152737
YBL008W	HIR1	TFIID	TATA-less
YBL008W-A
YBL009W	ALK2	TFIID	TATA-less
YBL010C	YBL010C	TFIID	TATA-less
YBL011W	SCT1	TFIID	TATA-less	-0.0660908	-0.590591	-0.713358	-0.119065	-1.14196	-0.691857	-0.940183	-0.0831349	-0.164352	-0.30538	0.0742992	0.116517
YBL013W	FMT1	TFIID	TATA-less	-0.242747	-0.302644	-0.281507	-0.926849	-0.902769	-0.1204	-0.631433	-0.0632731	-0.335982	-0.238484	0.402934	-0.438519
YBL014C	RRN6	TFIID	TATA-less	-0.242747	-0.302644	-0.281507	-0.926849	-0.902769	-0.14629	-0.631567	-0.0632731	-0.335982	-0.246426	0.402934	-0.438519
YBL015W	ACH1	TFIID	TATA-containing		-0.36651					-1.00299
YBL016W	FUS3	TFIID	TATA-containing							-0.671919
YBL017C	PEP1	TFIID	TATA-less	0.107894	-0.0546855	-0.949495	-0.601532	-1.13823	-0.756573	-0.586892	-0.292365	-0.328664	-0.234903	0.114501	-0.0867757
YBL018C	POP8	TFIID	TATA-less	-0.201474	0.261048	-0.798432	-0.530085	-0.582965				-0.233912
YBL019W	APN2	TFIID		0.0768859	0.449536	-2.6197	-0.844949					-0.510759
YBL020W	RFT1	TFIID	TATA-less	-0.0396725	0.234748	-0.916373	-0.507244				0.467831	-0.570501		1.3737	-0.456754
YBL021C	HAP3	TFIID	TATA-less	-0.0396725	0.234748	-0.916373	-0.507244				0.467831	-0.570501		1.3737	-0.456754
YBL022C	PIM1	TFIID		0.137109	0.126523	-0.966878	-0.106319	-0.304748			0.6481	-0.151587		1.18181	-0.776827
YBL023C	MCM2	TFIID
YBL024W	NCL1	TFIID	TATA-less	-0.232592	0.102492	-0.603021	-0.162832					-0.430612
YBL025W	RRN10	TFIID	TATA-less	-0.0250556	-0.0044186	-1.4438	-0.832068					-0.311202
YBL026W	LSM2	TFIID	TATA-less	-0.0798883	0.210385	-0.751579	-0.719345					-0.542511
YBL027W	RPL19B	TFIID	TATA-less				-0.28699	-0.768858	-0.916054	-0.328659	0.124687	-0.354781	-0.0401778	0.112177	-0.113604
YBL028C	YBL028C	TFIID	TATA-less						-0.620911	-0.356189			-0.0643806
YBL029C-A	YBL029C-A	TFIID	TATA-containing						-0.456498	-0.58633	-0.698811		-0.0525114	-0.199108	0.316011
YBL029W
YBL030C	PET9	CR	TATA-containing				-0.630596	-0.69417	-0.453011	-0.488478	-0.276701	-0.255892	-0.156131	0.370243	-0.141041
YBL031W	SHE1	TFIID	TATA-less	0.0230509	0.476135	-0.315751
YBL032W	HEK2	TFIID	TATA-less	-0.132568	-0.027558	-0.374885		-0.66739		-0.651159	-0.199461			-0.238794	0.0660463
YBL033C	RIB1	CR	TATA-containing	-0.132568		-0.374885		-0.631366		-0.663804	-0.255056			-0.00301606	-0.0597531
YBL034C	STU1	TFIID	TATA-less	-0.103819	0.0910601	-0.449033	-0.694449					-0.200764
YBL035C	POL12	TFIID	TATA-containing
YBL036C	YBL036C	TFIID	TATA-less	-0.0269563	-0.180515	-0.805861		-0.883544			-0.132574			0.747423	-0.324516
YBL037W	APL3	TFIID	TATA-less	0.0287571	-0.0680124	-1.15158		-0.949082			-0.0190329			1.28941	-0.561732
YBL038W	MRPL16	TFIID	TATA-less	0.124517	0.013331	-1.09122	-0.528391	-0.303509		-0.305834		-0.193101
YBL039C	URA7	TFIID	TATA-less							-0.332685
YBL039W-B	YBL039W-B	TFIID	TATA-less	-0.0432753		-1.24795		-0.776272			0.321731			0.72227	-0.221071
YBL040C	ERD2	TFIID	TATA-less	-0.0748444	-0.165732	-0.8681	-0.476544	-0.867653			-0.013798	-0.292446		0.500509	-0.0170205
YBL041W	PRE7	TFIID	TATA-less	-0.0198875	-0.282493	-0.710185	-0.613703	-0.971055	-0.684369	-0.812134	-0.194751	-0.24389	0.01737	-0.11185	0.410598
YBL042C	FUI1	TFIID	TATA-less								-0.902728			0.250811	0.589817
YBL043W											-1.09426			0.126537	-0.20255
YBL044W				-0.130136	-0.904694		-0.484524	-0.967398	-0.613907	-0.73818	-0.513492	-0.0617551	-0.253824	0.339759	-0.0575291
YBL045C	COR1	TFIID	TATA-less	-0.132566	-0.904694	-0.873186	-0.484524	-0.967398	-0.613907	-0.73818	-0.513492	-0.0617551	-0.253824	0.339759	-0.0575291
YBL046W	PSY4	TFIID	TATA-less	0.258261	0.530359	-0.639833	-0.259127	-0.71445			0.184118	-0.026609		0.733847	-0.512002
YBL047C	EDE1	TFIID	TATA-less	0.258261	0.530359	-0.639833	-0.259127	-0.71445			0.184118	-0.026609		0.733847	-0.512002
YBL049W
YBL050W	SEC17	TFIID	TATA-less	0.233839	0.408044	-0.656745	0.006195	-0.754266			0.843043	0.0178799		0.25532	0.0350058
YBL051C	PIN4	TFIID	TATA-less	0.233839	0.408044	-0.656745	0.006195	-0.754266			0.843043	0.0178799		0.25532	0.0350058
YBL052C	SAS3	TFIID		-0.0211319	0.396462	-0.872721
YBL054W	TOD6	TFIID	TATA-less						-0.578929	-0.388428			-0.32378
YBL055C	YBL055C	TFIID	TATA-less					-0.487609	-0.631079	-0.388428	-0.401035		-0.359779	-0.0515725	-0.334729
YBL056W	PTC3	TFIID	TATA-less	0.167415	0.490534	-0.864383	-0.127143	-0.956682			-1.11681	-0.262895		0.00472444	-0.854117
YBL057C	PTH2	TFIID	TATA-less	0.167415	0.490534	-0.864383	-0.127143	-0.956682			-1.11681	-0.262895		0.00472444	-0.854117
YBL058W	SHP1	TFIID	TATA-containing	0.18228	0.23738	-0.782418	0.213455	-0.804933			0.411886	0.0086104		0.929703	-0.663127
YBL059C-A	CMC2	TFIID		0.207314	0.310731	-2.05298	-0.690737					-0.401594
YBL059W	YBL059W	TFIID	TATA-less	0.207314	0.310731	-2.05298	-0.690737					-0.401594
YBL060W	YEL1	TFIID		-0.0507081		-0.592158		-1.06902
YBL061C	SKT5	TFIID	TATA-less	-0.0507081		-0.592158		-1.15786
YBL063W	KIP1	TFIID	TATA-less	0.0240629	0.364027	-0.757691
YBL064C	PRX1	CR	TATA-containing		0.171589		-0.741881	-0.698925			-0.194464	-0.237356		0.54186	-0.149361
YBL066C	SEF1	TFIID
YBL067C	UBP13	TFIID	TATA-less	0.0484472	0.424973	-0.978551	-0.592453				-0.214911	-0.562688		0.635652	-0.719297
YBL068W	PRS4	TFIID	TATA-less
YBL069W	AST1	TFIID	TATA-containing
YBL071C-B								-0.531454		-0.167105	-0.000987233			0.666077	0.120772
YBL071W-A								-0.085702		0.654667
YBL072C	RPS8A	TFIID	TATA-less
YBL074C	AAR2	TFIID	TATA-less	-0.0316883	-0.379692	-0.749917		-0.858018		-0.58658	-0.374061			0.0773914	-0.254734
YBL075C	SSA3	TFIID
YBL076C	ILS1	TFIID	TATA-less	-0.134105	-0.116129	-0.732577	-0.0800037					-0.346466
YBL078C	ATG8	TFIID	TATA-less	0.0701552	0.110265	-1.18434	-0.3808				-0.893227	-0.0202162		-0.101386	-0.17689
YBL079W	NUP170	TFIID	TATA-less				-0.614457	-1.09834				-0.186409
YBL080C	PET112	TFIID	TATA-less	-0.142289	0.00513806	-1.02571	-1.1247	-1.08801				-0.273057
YBL081W	YBL081W	TFIID	TATA-less
YBL082C	ALG3	TFIID	TATA-less
YBL084C	CDC27	TFIID	TATA-less	0.00691612	0.310579	-1.64284
YBL085W	BOI1	TFIID	TATA-less	0.0711197	-0.0883234	-1.03404	-0.275945	-0.551272		-0.491295	0.244619	-0.344454		0.740905	-0.334315
YBL086C	YBL086C	TFIID		-0.0738964	0.00126593	-1.55584	-0.425643				-0.57035	-0.22539		0.283366	-0.739925
YBL087C	RPL23A	TFIID	TATA-less				-0.279722	-0.530659		-0.522312	-0.1119	-0.488147		0.409269	-0.111283
YBL088C	TEL1	TFIID	TATA-containing	-0.0266179	0.263586	-1.90963	-0.755551					-0.235551
YBL089W	AVT5	TFIID		0.0903741	0.416822	-1.97803	-1.14632	-0.901131				-0.387845
YBL090W	MRP21	TFIID	TATA-less	0.106798	0.32642	-1.55341	-0.791241	-0.627842				-0.323821
YBL091C	MAP2	TFIID		0.106798	0.32642	-1.55341	-0.791241	-0.628324				-0.323821
YBL091C-A	SCS22	TFIID	TATA-containing	-0.0162434	-0.322169	-1.73082	-0.913834					-0.465701
YBL092W	RPL32	TFIID	TATA-less				-0.164194	-0.734799	-0.327699	-0.37156	0.0620195	-0.442927	-0.282936	-0.105188	0.265389
YBL093C	ROX3	TFIID	TATA-less	0.0710844	-0.285701	-0.675241	-0.68192			-0.268378	0.0687055	-0.360819		-0.0837197	0.480094
YBL095W	YBL095W	TFIID	TATA-containing	-0.105907		-1.01679					-0.590485			0.585545	-0.534395
YBL097W	BRN1	TFIID	TATA-less	-0.0517981	0.27624	-0.713093
YBL098W
YBL099W	ATP1	TFIID	TATA-less	0.108568	-0.641442	-0.842482	-0.273217	-0.82737	-0.669919	-0.986095	-0.102829	-0.0137306	-0.362412	0.0219922	0.0909964
YBL100W-A									-0.290002	-0.0664408	-0.0271247		-0.493203	0.25101	0.323137
YBL100W-B									-0.290002	-0.0664408	-0.0271247		-0.493203	0.25101	0.323137
YBL100W-C				-0.0154404	-0.248143		-1.05201			-0.534607	-0.665275	-0.394189		0.407141	-0.258113
YBL101C	ECM21	TFIID		-0.0154404		-1.55289		-1.0335		-0.669143	-0.640863			-0.152884	-0.607003
YBL102W	SFT2	TFIID	TATA-less	0.0878682	0.239206	-1.15674	-0.252778	-1.18682			-0.0426278	-0.175467		0.420777	-0.321521
YBL103C	RTG3	TFIID	TATA-less	0.0878682	0.239206	-1.15674	-0.252778	-1.18682			-0.0426278	-0.175467		0.420777	-0.321521
YBL104C	SEA4	TFIID	TATA-less	0.0544498	0.49343	-1.1787
YBL105C	PKC1	TFIID	TATA-less	0.0574567	0.274681	-1.01188	-0.244226					-0.234877
YBL106C	SRO77	CR
YBL107C	MIX23	TFIID	TATA-less	-0.063492	-0.259429	-1.4413	-1.04643					-0.574696
YBL108C-A
YBL111C
YBL112C
YBL113C
YBR001C	NTH2	CR	TATA-containing	0.0167679	-0.402313	-0.377815	-1.11181	-1.24727		-1.39221	-0.461965	-0.444215		0.48283	-0.534516
YBR002C	RER2	TFIID	TATA-less	0.0391112	-0.00285122	-0.874135	-0.611236	-1.17326			-0.0249573	-0.311923		0.59105	-0.497777
YBR003W	COQ1	TFIID	TATA-less	0.0391112	-0.00285122	-0.874135	-0.611236	-1.17326			-0.0249573	-0.311923		0.59105	-0.497777
YBR004C	GPI18	TFIID						-0.800254	-0.480523	-0.661669	-0.346722		-0.168907	0.39939	0.416903
YBR005W	RCR1	TFIID	TATA-less					-0.800254	-0.491163	-0.661669	-0.346722		-0.139882	0.39939	0.416903
YBR006W	UGA2	TFIID		-0.179131	-0.252677	-1.38204					-0.679692			0.710261	-0.0971211
YBR007C	DSF2	CR	TATA-less					-1.03593	-1.13121	-0.687899	-0.669746		-0.0754022	0.564121	-0.0600038
YBR008C	FLR1	CR	TATA-less	0.130823		-0.59258					-0.252869			1.4733	1.0324
YBR009C	HHF1	CR	TATA-containing	-0.0103472		-0.462522	-1.05	-1.09314	-0.814939	-1.09149	-0.816835	-0.0800338	-0.279166	0.853364	0.13427
YBR010W	HHT1	CR	TATA-containing						-0.939168	-1.13879	-0.735081		-0.290167	0.7265	0.310607
YBR011C	IPP1	TFIID	TATA-less	-0.262511	-0.360688	-1.00598	-0.361885	-0.754383			-0.756653	0.0921667		0.382744	0.838516
YBR012W-A										-0.348979	-0.410689			0.575111	0.955152
YBR012W-B										-0.348979	-0.410689			0.575111	0.955152
YBR013C				0.0863438	-0.00676887		-1.34705					-0.416885
YBR014C	GRX7	TFIID	TATA-less
YBR015C	MNN2	TFIID	TATA-less	-0.101277	0.361312	-1.15849	-0.85362				-0.692154	-0.497551		-0.0887746	-0.0904291
YBR016W	YBR016W	TFIID	TATA-containing					-0.933729		-0.478403	-0.475097			-0.154644	-0.0151906
YBR017C	KAP104	TFIID	TATA-less	-0.113232	0.431891	-0.810432	-0.300557					-0.299125
YBR018C
YBR019C
YBR020W
YBR021W										-0.304034	-0.457235			0.356533	-0.0847001
YBR022W	POA1	TFIID	TATA-less	-0.0145266	0.338941	-2.52014	-0.93132					-0.453253
YBR023C	CHS3	TFIID	TATA-less	-0.297088		-1.42916
YBR024W	SCO2	TFIID	TATA-less	-0.0454494	0.233024	-2.43517
YBR025C	OLA1	TFIID	TATA-less				-0.369033		-0.785406	-0.589374	-0.323249	-0.369832	-0.124115	-0.270976	-0.309002
YBR026C	ETR1	TFIID	TATA-less	-0.0179011	0.115998	-3.01266
YBR028C	YPK3	TFIID	TATA-less	-0.0736071	0.452323	-1.91667
YBR029C	CDS1	TFIID	TATA-less	-0.0509256	0.559102	-1.04125
YBR030W	RKM3	TFIID	TATA-less	-0.0509256	0.559102	-1.04125
YBR031W	RPL4A	TFIID	TATA-containing	-0.156791	0.235965	-0.578638
YBR033W				-0.347641	-0.383284			-1.33439		-1.27302	-1.69454			-0.471681	-1.08563
YBR034C	HMT1	TFIID	TATA-containing	-0.223428		-0.499696	-0.381491	-1.04365			-0.287062	-0.227619		0.768447	-0.180676
YBR035C	PDX3	TFIID	TATA-less	-0.0491719	-0.199143	-1.25248					-0.176783			0.459442	-0.193406
YBR036C	CSG2	TFIID	TATA-less	0.0220457	-0.0197404	-0.628919	-0.795363	-1.1221		-0.644701	0.0721547	-0.181981		0.0816597	-0.304921
YBR037C	SCO1	TFIID	TATA-less	0.0445164	-0.352951	-1.36916	-0.988949	-0.759823		-0.586149	-0.107208	-0.462697		0.291436	-0.293654
YBR038W	CHS2	TFIID	TATA-less							-0.587995
YBR039W	ATP3	TFIID	TATA-less	-0.0717051	0.127743	-1.59802	-0.0857384	-0.542779				-0.264667
YBR040W
YBR041W	FAT1	TFIID		0.0568801	0.414417	-1.32616	-0.709537					-0.335504
YBR042C	CST26	TFIID	TATA-less	0.0568964	0.472242	-1.61584
YBR043C	QDR3	TFIID	TATA-less	-0.162093	0.0244814	-0.989192		-1.13961		-0.817308	-0.0719206			0.06839	-0.396082
YBR044C	TCM62	TFIID		-0.0497705	0.122772	-1.16038	-1.05262	-1.09429			-0.30211	-0.516567		0.906207	-0.626438
YBR045C
YBR046C	ZTA1	CR	TATA-less	-0.181763	-0.429051	-1.44725	-1.35953	-1.10555			-0.865365	-0.540736		0.022242	-0.709437
YBR047W	FMP23	TFIID		-0.181763	-0.429051	-1.44725	-1.34914	-1.10488			-0.865365	-0.540847		0.022242	-0.709437
YBR048W	RPS11B	CR	TATA-less				-0.243103	-0.904299			-0.0119813	-0.358097		0.256363	-0.201863
YBR049C	REB1	TFIID	TATA-less	0.107698	-0.169426	-0.704061	-0.459664	-1.07627	-0.567357	-0.882756	-0.298298	-0.412295	-0.227432	-0.162294	-0.0913743
YBR050C				-0.14157			-1.3137	-1.76401	-1.71684	-1.70545	-1.19647	-0.445314	-0.418903	-0.11004	-0.408352
YBR052C	RFS1	TFIID	TATA-less	0.119651	-0.543094	-1.20405	-0.764682	-1.09296		-0.964949	-0.48489	-0.46854		0.595458	-0.283929
YBR053C	YBR053C	TFIID	TATA-less	0.0225922	-0.463338	-1.4968	-1.11761	-1.48238		-0.679963	-0.687204	-0.380696		0.406659	-0.68409
YBR054W	YRO2	CR	TATA-containing						-0.412954	-0.396019			-0.365728
YBR055C	PRP6	TFIID	TATA-less						-0.970264	-0.740809			-0.137635
YBR056W	YBR056W	TFIID	TATA-less	0.207004	-0.265148	-1.18814	-0.29436	-0.870484	-0.946811	-0.740809	0.17035	0.0309747	-0.13893	0.472415	-0.413496
YBR056W-A	YBR056W-A	CR	TATA-less				-0.740795	-0.289458	0.125041	-0.214866	0.671278	-0.151905	-0.15483	0.382497	0.0734114
YBR057C	MUM2	TFIID	TATA-less	0.073641	0.239458	-1.4833
YBR058C	UBP14	TFIID		0.00868759	0.184754	-1.18867
YBR058C-A	TSC3	TFIID	TATA-less	0.00491782	0.217494	-0.734065	-0.990837	-0.9622		-0.661799	-1.02816	-0.339994		0.00952393	-0.595128
YBR059C	AKL1	TFIID	TATA-less	0.165059	0.0715401	-0.956013	-0.548918	-1.02671	-1.0647	-0.800404	-0.253532	-0.193845	-0.308742	-0.112639	-0.57356
YBR060C	ORC2	TFIID	TATA-less	-0.0417216	0.00703695	-0.303936	-0.218983	-0.617664	-0.615359		-0.180654	-0.255289	-0.208282	0.585867	-0.351438
YBR061C	TRM7	TFIID	TATA-less	0.027531		-1.64827
YBR062C	YBR062C	TFIID	TATA-less	0.0528064	0.148145	-1.80742
YBR063C	YBR063C	TFIID
YBR065C	ECM2	TFIID	TATA-less								-0.506732			0.602733	-0.0922391
YBR066C	NRG2	CR	TATA-containing				-0.783418		-0.957207	-0.476517		-0.0587956	-0.293278
YBR067C	TIP1	TFIID	TATA-containing
YBR068C	BAP2	CR	TATA-containing					-0.820819	-0.663679	-0.668863	-0.343759		-0.173108	0.576075	0.450563
YBR069C	TAT1	CR	TATA-containing				-0.460411		-1.32417	-1.01624	-0.880816	-0.246183	-0.279445	0.221575	0.444577
YBR070C	ALG14	TFIID	TATA-less	-0.152126		-0.683919	-1.15449				-0.980125	-0.410888		0.680347	-0.0402629
YBR071W	YBR071W	CR	TATA-less	-0.142508		-0.711027	-1.15711	-1.1722			-1.08059	-0.411266		0.745665	0.0986969
YBR072C-A				-0.206265	-0.164717		-0.913843					-0.440653
YBR072W				-0.223266			-1.36995			-1.18973	-1.05867	-0.501974		0.0295183	-0.544926
YBR073W	RDH54	TFIID	TATA-containing	-0.206265	-0.193776	-1.05857	-0.891232					-0.448862
YBR074W	PFF1	TFIID	TATA-less
YBR076W
YBR077C	SLM4	TFIID	TATA-less	0.0265503	-0.620985	-0.737809	-0.720983	-0.949483	-0.562401	-0.261062	-0.167588	-0.249168	-0.356487	0.0762693	0.066539
YBR078W	ECM33	CR	TATA-less				-0.479156	-0.734683	-0.404828	-0.573001	-0.313375	-0.102674	-0.361309	0.296837	0.150022
YBR079C	RPG1	TFIID	TATA-less
YBR080C	SEC18	TFIID	TATA-less	0.0330402	0.259148	-0.940759	-0.375803	-0.755245			0.0226505	-0.169556		1.31049	-0.56266
YBR081C				-0.0541932	0.264532
YBR082C	UBC4	TFIID	TATA-less	0.0594434	-1.02219	-0.473617	-0.593666	-0.961866	-0.648154	-0.702468	-0.363929	-0.280793	-0.174171	-0.306517	0.229184
YBR083W	TEC1	CR	TATA-containing							-0.666573	-0.540529			0.246765	0.690066
YBR084C-A	RPL19A	TFIID	TATA-less				-0.124707	-0.750369		-0.440726	-0.011036	-0.375524		0.359757	-0.0303699
YBR084W	MIS1	TFIID	TATA-less
YBR085C-A	YBR085C-A	CR	TATA-containing				-0.799662	-1.27991		-0.656513		-0.379925
YBR085W	AAC3	TFIID	TATA-less							-0.442707
YBR086C	IST2	TFIID	TATA-less	0.0336487	-0.319808	-0.798835	-0.664897	-1.14257			-0.31251	-0.0170391		0.304517	-0.471591
YBR087W	RFC5	TFIID	TATA-less	0.0109442		-0.821382		-1.03604
YBR088C	POL30	CR	TATA-containing
YBR089C-A	NHP6B	TFIID					-0.107151		-0.681067	-0.660656	-0.00748069	-0.468695	-0.0816897	0.335015	-0.156351
YBR090C
YBR091C	TIM12	TFIID	TATA-less
YBR092C	PHO3	CR	TATA-containing							-0.395038
YBR093C	PHO5	TFIID	TATA-containing							-0.589098
YBR094W	PBY1	TFIID		-0.0787065	0.0350964	-1.44952					-0.501321			0.666316	-0.645717
YBR095C	RXT2	TFIID	TATA-less	0.0257266	-0.0741192	-0.808419	-1.03883	-1.23226		-0.788767	0.113151	-0.315529		0.450592	-0.702769
YBR096W	YBR096W	TFIID	TATA-less	0.0257266	-0.0741192	-0.808419	-1.03883	-1.23226		-0.786391	0.113151	-0.315529		0.450592	-0.702769
YBR097W	VPS15	TFIID	TATA-less	-0.112521	-0.0897296	-1.47678
YBR098W	MMS4	TFIID		-0.0442795	0.387743	-0.948494
YBR101C	FES1	TFIID	TATA-less	-0.08773	-0.713057	-0.730386	-0.694762	-0.788313	-0.635314	-0.578222	-0.331591	-0.267596	-0.429028	-0.372168	-0.0350031
YBR102C	EXO84	TFIID	TATA-less	0.135636	0.776001	-0.999367	-0.456136					-0.251082
YBR103W	SIF2	TFIID	TATA-less	0.135636	0.776001	-0.999367	-0.456231					-0.251082
YBR104W	YMC2	TFIID	TATA-less
YBR105C	VID24	TFIID	TATA-containing				-0.604291		-0.875429	-1.0027	-0.445128	-0.260622	-0.238598	-0.147402	0.197494
YBR106W	PHO88	TFIID	TATA-containing	-0.0998386	-0.893606	-0.304158	-0.371576	-0.839709	-0.684676	-0.72866	-0.0427069	-0.240521	-0.27964	0.039696	0.132532
YBR107C	IML3	TFIID	TATA-less	-0.0557463	-0.108852	-1.2552	-1.0157	-0.823074			-0.222437	-0.307915		1.15276	-0.617194
YBR108W	AIM3	TFIID	TATA-less	-0.0557463	-0.108852	-1.2552	-1.0157	-0.80631			-0.222437	-0.307915		1.15276	-0.617194
YBR109C	CMD1	TFIID	TATA-less	0.140664		-0.746553	-0.347053	-1.16736			-0.0941823	-0.214815		0.42052	0.0706628
YBR110W	ALG1	TFIID	TATA-less	0.176351	0.141288	-0.781056	-0.706906	-1.15307			-0.0941823	-0.344584		0.42052	0.0706628
YBR111C	YSA1	TFIID	TATA-containing	0.132393	0.0743617	-1.69419	-0.994836	-1.0583		-1.01446	-0.770923	-0.247736		0.0321625	-0.228801
YBR111W-A	SUS1	TFIID	TATA-less	0.171118	0.2699	-1.85516	-0.511208	-0.352695		0.244317	0.434287	-0.27947		0.631827	-0.705654
YBR112C	CYC8	TFIID	TATA-less	-0.0659003		-0.564937	-0.599114	-1.12569	-0.865536	-0.599507	-0.351466	-0.26383	-0.174249	0.195463	0.166984
YBR114W	RAD16	TFIID	TATA-containing	0.079462	-0.867135	-0.426407	-0.739359	-0.817679	-0.828866	-0.530578	-0.189618	-0.566804	-0.0318566	0.275371	-0.230715
YBR115C
YBR117C											-0.2912			0.0888377	-0.435926
YBR118W	TEF2	CR	TATA-containing				-0.496274	-0.88549	-0.346606	-0.553922	-0.501878	-0.16677	-0.150049	-0.266475	0.117661
YBR119W	MUD1	TFIID	TATA-less	-0.140939	-0.528042	-1.51552	-1.26103	-1.60187			-1.12365	-0.653759		-0.652738	-2.07928
YBR120C	CBP6	TFIID	TATA-less	0.052963	0.064665	-0.881676	-0.470518				0.151765	-0.290978		1.45631	-0.601875
YBR121C	GRS1	TFIID	TATA-less	-0.00976462	0.0320668	-1.13241	-0.88063	-1.05897			-0.781127	-0.46699		-0.0293436	-0.595315
YBR122C	MRPL36	TFIID	TATA-less	-0.205458	0.0911417	-0.609717		-0.680596
YBR123C	TFC1	TFIID	TATA-less	-0.0203181	0.193446	-1.02159
YBR125C	PTC4	TFIID	TATA-containing	-0.0194499	-0.202806	-1.25718	-1.24632	-1.39093			-1.08164	-0.469374		-0.38356	-0.973235
YBR126C	TPS1	CR	TATA-containing	-0.0133013		-0.935676	-0.747239	-0.985	-0.782634	-0.71937	-0.387061	-0.318867	-0.242224	0.00248365	-0.158099
YBR126W-A				0.0331214			-0.855281	-1.0427	-0.878418	-0.941409	-0.489372	-0.308706	-0.418612	-0.333175	-0.119353
YBR127C	VMA2	TFIID	TATA-less	-0.0417127	0.0929904	-0.585474	-0.369728	-1.04796		-0.689459	0.0297377	-0.274444		-0.00844516	-0.202313
YBR128C	ATG14	TFIID		0.127874	0.284249	-1.36162
YBR129C	OPY1	TFIID		0.00508802	0.146224	-0.900736	-0.633966			-0.486293	-0.193786	-0.354624		0.551604	-0.516148
YBR130C	SHE3	TFIID		0.291748	0.0617877	-0.477027	-0.760491	-0.801434			0.168584	-0.204307		0.51072	-0.673182
YBR131W	CCZ1	TFIID	TATA-less	0.291748	0.0617877	-0.477027	-0.761572	-0.824218			0.168584	-0.204307		0.51072	-0.673182
YBR132C	AGP2	CR	TATA-containing	-0.212504	-0.295147	-1.41704	-1.00058	-1.02633		-1.53531	-0.824458	-0.573058		-0.0859657	-0.686226
YBR133C	HSL7	TFIID	TATA-less	0.00327744	0.0568527	-0.629789	-0.773306	-0.691471		-0.574372	-0.299729	-0.354869		0.497714	-0.456843
YBR135W	CKS1	TFIID	TATA-containing		0.0441268			-0.740164		-0.593302	-0.299729			0.497714	-0.456843
YBR136W	MEC1	TFIID	TATA-less	-0.339182	0.181668	-1.16461
YBR137W	YBR137W	TFIID	TATA-less	0.0101616	-0.121372	-1.64555	-1.20872					-0.505905
YBR138C	YBR138C	TFIID	TATA-less	0.00268822	-0.0764174	-0.8535	-0.606735	-1.10789			-0.33107	-0.314008		0.472319	-0.54439
YBR139W	YBR139W	CR	TATA-containing	0.00268822	-0.0764174	-0.8535	-0.606735	-1.11043			-0.33107	-0.314008		0.472319	-0.54439
YBR140C	IRA1	TFIID		0.0602481	0.0691583	-0.843963	-0.671753	-0.968678			-0.0338914	-0.299925		0.608938	-0.387238
YBR141C	BMT2	TFIID
YBR142W	MAK5	TFIID	TATA-less
YBR143C	SUP45	TFIID	TATA-less	-0.185753	0.0212983	-0.84035	-0.678848	-1.16727			-0.203235	-0.366366		0.340941	-0.538789
YBR145W	ADH5	CR	TATA-containing					-1.40476	-0.673481	-1.04244	-0.759855		-0.488882	-0.608047	-0.411948
YBR146W	MRPS9	TFIID	TATA-less	0.214758	-0.155002	-0.665946	-1.27662	-1.39359			-0.0365814	-0.314126		0.310457	-0.646202
YBR147W											-0.36773			-0.257287	-1.18998
YBR148W
YBR149W	ARA1	CR	TATA-containing	-0.0242043	-0.311922	-1.26749	-0.886704	-1.2538	-0.91175	-1.07299	-0.543579	-0.445781	-0.230992	-0.221526	-0.290759
YBR150C	TBS1	TFIID	TATA-less					-0.794413	-0.888763	-0.549596			0.044829
YBR151W	APD1	TFIID	TATA-less	0.061158	-0.176937	-1.2447	-0.854612	-0.993869	-0.879443	-0.565192	-0.0823952	-0.393347	0.0118276	0.22202	0.177887
YBR152W	SPP381	TFIID	TATA-less	0.0522875	0.0350164	-1.90049	-0.74306					-0.365698
YBR153W	RIB7	TFIID	TATA-less	0.00367931	-0.261967	-1.0986
YBR154C	RPB5	TFIID	TATA-less
YBR155W	CNS1	TFIID
YBR156C	SLI15	TFIID	TATA-less
YBR157C	ICS2	CR	TATA-containing						-0.812912	-0.659879	-0.611999		0.00321003	0.183661	0.658753
YBR158W	AMN1	CR	TATA-containing				-0.563049		-0.601489	-0.72934		-0.463846	-0.129631
YBR159W	IFA38	TFIID	TATA-less	-0.232702	-0.0497614	-1.2132	-0.661086					-0.344045
YBR160W	CDC28	TFIID	TATA-less
YBR161W	CSH1	TFIID	TATA-less	-0.183959		-1.0957		-0.97423	-0.983687	-0.481503	-0.335421		-0.0101112	0.135391	-0.267939
YBR162C	TOS1	CR	TATA-less				-0.725159	-0.903492	-0.573726	-0.475196	-0.353297	-0.204904	-0.188233	-0.212038	0.069236
YBR162W-A	YSY6	TFIID	TATA-less					-1.04548	-0.789085	0.012373	-0.0717985		-0.202423	-0.205298	-0.0063862
YBR163W	EXO5	TFIID	TATA-less	0.195514	-0.333742	-0.464351	-1.084	-1.30263		-0.503436	-0.158662	-0.276616		0.0781985	-0.346927
YBR164C	ARL1	TFIID	TATA-containing	0.0672572	-0.149827	-0.525161	-0.587428	-1.05584			-0.230487	-0.284363		0.246457	-0.149669
YBR165W	UBS1	TFIID	TATA-less	0.0672572	-0.149827	-0.525161	-0.587428	-1.05584			-0.230487	-0.284363		0.246457	-0.149669
YBR166C	TYR1	TFIID		0.0177911	0.557442	-1.28136	-0.480698					-0.335344
YBR167C	POP7	TFIID		0.178836	0.411684	-2.24289	-1.03459					-0.52499
YBR168W	PEX32	TFIID	TATA-less	0.178836	0.411684	-2.24289	-1.03766					-0.525015
YBR169C	SSE2	TFIID		-0.0246428	-0.452194	-0.948406	-0.822063	-0.996966	-0.54742	-0.948914	-0.500503	-0.403561	-0.27982	-0.324918	-0.804005
YBR170C	NPL4	TFIID		0.132658	0.224163	-0.646554	-0.26135	-0.663694			0.509924	-0.38045		0.615225	-0.411549
YBR171W	SEC66	TFIID		0.132658	0.224163	-0.646554	-0.26135	-0.663694			0.509924	-0.38045		0.615225	-0.411549
YBR172C	SMY2	TFIID	TATA-less	0.0844219	0.15634	-0.426662
YBR173C	UMP1	TFIID	TATA-less	-0.0834368	0.139525	-0.883498					0.29392			0.389276	-0.257902
YBR175W	SWD3	TFIID	TATA-less	-0.0834368	0.139525	-0.883498					0.29392			0.389276	-0.257902
YBR176W	ECM31	TFIID	TATA-less	-0.0195643	0.237396	-1.48137
YBR177C	EHT1	CR									-0.674855			0.0071973	-0.368415
YBR179C	FZO1	TFIID	TATA-less	-0.252305		-0.386519		-0.507857		-0.632754	-0.109173			0.264127	-0.202457
YBR180W										-0.479185
YBR181C	RPS6B	TFIID	TATA-less				-0.315215	-0.681291		-0.333349	-0.0517186	-0.499232		0.580082	-0.326896
YBR182C
YBR182C-A					-0.782944		-0.635796	-0.80645	-0.532621	-0.75931	-0.377005	-0.346267	-0.233554	0.074633	0.341616
YBR183W					-0.883787		-0.60671	-0.80645	-0.532621	-0.940755	-0.377005	-0.293445	-0.233554	0.074633	0.341616
YBR184W
YBR185C	MBA1	TFIID	TATA-less	0.0712341	0.52861	-1.27074	-0.613331					-0.365571
YBR186W
YBR187W	GDT1	TFIID	TATA-less	-0.253628		-0.616088	-0.885018	-1.04031			-0.270878	-0.282043		0.502162	-0.435764
YBR188C	NTC20	TFIID		-0.154418	-0.268517	-0.580616		-0.907338		-0.55301
YBR189W	RPS9B	TFIID	TATA-less	-0.154418	-0.272879	-0.580616	-0.0668539	-0.907338		-0.515085		-0.388638
YBR191W	RPL21A	TFIID	TATA-less				-0.0906462	-0.493136		-0.362912	-0.0556865	-0.359081		0.515928	0.0566151
YBR192W	RIM2	TFIID	TATA-less
YBR193C	MED8	TFIID	TATA-less	0.127143	0.19436	-1.35329	-0.938757	-0.908501				-0.488231
YBR194W	AIM4	TFIID		0.127143	0.19436	-1.35329	-0.938757	-0.971658				-0.488231
YBR195C	MSI1	TFIID	TATA-less
YBR196C	PGI1	CR	TATA-containing				-0.367843	-0.996521	-0.303369	-0.49901	-0.326569	-0.19407	-0.177551	0.344822	0.0708285
YBR196C-A							-0.486742	-0.947241	-0.433889	-0.314634	-0.236665	-0.561796	-0.237263	0.428833	0.334596
YBR196C-B									-0.399856	-0.437393			-0.15608
YBR197C	YBR197C	TFIID	TATA-less
YBR198C	TAF5	TFIID	TATA-less	0.148182	-0.0974347	-1.10267	0.279088	-0.896129			0.0981204	-0.301969		0.409213	-0.195965
YBR199W	KTR4	TFIID	TATA-less	0.148182	-0.0974347	-1.10267	0.279088	-0.896129			0.0981204	-0.301969		0.409213	-0.195965
YBR200W	BEM1	TFIID	TATA-less	-0.127047	0.0530671	-1.12144
YBR200W-A
YBR201C-A	YBR201C-A	TFIID	TATA-containing						-0.374305	-0.425824			-0.255276
YBR201W	DER1	TFIID	TATA-less	-0.0395215		-0.780527
YBR202W	MCM7	TFIID	TATA-less						-0.396275	-0.496729			0.0511263
YBR203W									-1.14505	-0.529672	-0.728102		0.205564	0.321668	-0.0280029
YBR204C	LDH1	TFIID		0.0781418	0.447693	-1.93494	-1.06445					-0.325508
YBR205W	KTR3	TFIID	TATA-less	0.0781418	0.447693	-1.93494	-1.06445					-0.325508
YBR207W	FTH1	TFIID	TATA-less	0.161638	0.0944383	-1.80946	-0.708286	-0.925037			-0.434285	-0.257569		0.5225	-0.5133
YBR208C	DUR1,2	TFIID	TATA-less				-1.18501			-0.376578		-0.160095
YBR210W	ERV15	TFIID	TATA-less	0.183238	0.193671	-0.942558	-0.878032	-1.19398				-0.3941
YBR211C	AME1	TFIID	TATA-less	0.162643	-0.429271	-0.76034	-0.501328	-1.26746			0.0918203	-0.0195617		0.196714	-0.471885
YBR212W	NGR1	TFIID	TATA-less	0.162643	-0.429271	-0.76034	-0.501328	-1.26746			0.0918203	-0.0195617		0.196714	-0.471885
YBR213W	MET8	TFIID		-0.172404		-1.16764
YBR214W	SDS24	TFIID	TATA-less	0.0526549	0.0684532	-1.47963	-0.682928	-1.03546		-1.1019	-0.245064	-0.236722		0.0175606	-0.347829
YBR215W	HPC2	TFIID	TATA-less	0.0537773	0.580427	-1.26233	-0.728752					-0.437439
YBR216C	YBP1	TFIID		0.131482	0.607761	-1.61174	-0.286518					-0.299378
YBR217W	ATG12	TFIID	TATA-less	0.131482	0.607761	-1.61174	-0.285605					-0.30172
YBR218C	PYC2	CR	TATA-less	0.0167612	-0.634604	-0.937392	-0.809374		-0.794343	-1.12929	-0.565402	-0.204955	-0.379984	-0.41313	-0.33946
YBR219C
YBR220C	YBR220C	TFIID	TATA-less
YBR221C	PDB1	TFIID	TATA-less	0.0735349	-0.204928	-1.38244	-0.626632	-0.968942			-0.13359	-0.230581		0.994912	-0.503874
YBR221W-A				0.0646323	-0.210828		-0.581097	-0.60363			1.39192	-0.236269		1.73816	0.202095
YBR222C	PCS60	TFIID	TATA-containing	-0.276583	-0.182415	-0.815272	-0.755275	-0.871038			-0.505072	-0.4163		0.457008	-0.302638
YBR223C	TDP1	TFIID		0.16449	0.350047	-1.24315	-0.789845	-0.871132			-0.897587	-0.313734		0.228143	-0.542824
YBR225W	YBR225W	TFIID		0.16449	0.350047	-1.24315	-0.789845	-0.871132			-0.921327	-0.313734		0.241634	-0.56379
YBR227C	MCX1	TFIID		0.0833974	0.491031	-1.94532	-0.712744					-0.47124
YBR228W	SLX1	TFIID	TATA-less	0.0833974	0.491031	-1.94532	-0.712744					-0.47124
YBR229C	ROT2	TFIID	TATA-less	-0.147156	0.0101216	-0.87182	-1.14571	-1.46961			-1.20855	-0.287757		-0.278321	-1.03177
YBR230C	OM14	CR	TATA-containing				-1.03977	-1.09736	-1.07379	-1.0513	-0.660298	-0.569366	-0.596725	-0.39862	-0.671682
YBR230W-A				-0.0318393	-0.532837		-1.0121	-1.23371	-0.953444	-0.849402	-0.885575	-0.619283	-0.593855	-0.665855	-0.988901
YBR231C	SWC5	TFIID	TATA-less		-0.0899388						-0.355553			0.760046	-0.565191
YBR233W	PBP2	TFIID			-0.0939856						-0.340313			0.760734	-0.564632
YBR233W-A	DAD3	TFIID	TATA-less	0.0888346	0.705636	-1.45359
YBR234C	ARC40	TFIID	TATA-less	0.0901098	0.0052223	-1.56352	-0.552822	-1.20037			0.0544078	-0.126389		0.718862	-0.989936
YBR235W	VHC1	TFIID		0.0901098	0.0052223	-1.56352	-0.54965	-1.20037			0.0376989	-0.123818		0.734707	-0.992536
YBR236C	ABD1	TFIID	TATA-less	0.170461	0.224144	-0.722614
YBR237W	PRP5	TFIID	TATA-less	0.165589	0.239932	-0.725443
YBR238C	YBR238C	TFIID	TATA-less				-0.581091		-0.222731	-0.412603		-0.416417	0.0509843
YBR239C	ERT1	TFIID		-0.147959	0.518395	-1.3487
YBR240C				-0.0661237	0.157251		-1.07932					-0.789484
YBR241C				-0.208058				-1.37413
YBR242W	YBR242W	TFIID	TATA-containing	-0.209425		-1.21717		-1.3168
YBR243C	ALG7	CR	TATA-less	-0.04859	0.53515	-1.05515
YBR244W	GPX2	CR	TATA-containing		0.121233
YBR245C	ISW1	TFIID		-0.0840038	0.736742	-1.66697
YBR246W	RRT2	TFIID	TATA-less	-0.0832422	0.736561	-1.66569
YBR247C	ENP1	TFIID	TATA-less
YBR248C	HIS7	TFIID	TATA-less
YBR249C	ARO4	CR	TATA-less				-0.534708	-0.614707	-0.344471	-0.577216	0.174416	-0.639386	-0.262882	0.319122	-0.269774
YBR250W										-0.255301
YBR251W	MRPS5	TFIID	TATA-less	0.0980085	0.635396	-1.22028	-1.14846	-1.01895				-0.442511
YBR252W	DUT1	TFIID	TATA-containing	-0.0801406		-1.11151
YBR253W	SRB6	TFIID		-0.227405	0.0706268	-1.00309	-0.790518	-1.05006				-0.478318
YBR254C	TRS20	TFIID		-0.00963486		-1.61539
YBR255C-A	YBR255C-A	TFIID	TATA-less	-0.12526	0.193648	-1.88323	-0.160372	-1.1054				-0.416421
YBR255W	MTC4	TFIID		-0.00947539		-1.61505
YBR256C	RIB5	CR	TATA-containing	0.0696968	0.373584	-1.12586	-0.63965					-0.263729
YBR257W	POP4	TFIID	TATA-less	-0.100917	0.199134	-0.733912		-0.809327
YBR258C	SHG1	TFIID	TATA-less	0.0132067	0.708284	-1.08732
YBR259W	YBR259W	TFIID		0.0207297	0.708023	-1.09335
YBR260C	RGD1	TFIID		0.0951048	0.529778	-1.33563	-0.47015					-0.325697
YBR261C	TAE1	TFIID	TATA-less	0.0738642	0.15882	-2.90317
YBR262C	MIC12	TFIID	TATA-less	0.0728712	0.581544	-1.46462	-0.457838	-0.751868				-0.374973
YBR263W	SHM1	TFIID		0.0728712	0.581544	-1.46462	-0.459251	-0.746906				-0.376573
YBR264C	YPT10	TFIID	TATA-less	0.0755166	0.563909	-1.53931	-1.05025					-0.623798
YBR265W	TSC10	TFIID	TATA-less	0.0755166	0.563909	-1.53931	-1.04857					-0.625839
YBR267W	REI1	TFIID	TATA-less
YBR268W	MRPL37	TFIID	TATA-less	0.0418326	0.499359	-1.00979					0.0846064			1.42799	-0.453647
YBR269C	SDH8	TFIID	TATA-less	0.229476	0.228115	-1.12583	-0.658806	-1.15299			0.144473	-0.281174		1.06604	-0.80316
YBR270C				-0.0667634	0.717786			-0.966651
YBR271W	EFM2	TFIID	TATA-less	-0.0667634	0.717786	-1.19137
YBR272C	HSM3	TFIID	TATA-containing	0.0921035	0.501509	-2.36114
YBR273C	UBX7	TFIID		0.12068	0.496827	-2.23876	-0.843407	-0.584717				-0.197652
YBR274W	CHK1	TFIID		0.12068	0.496827	-2.23876	-0.863692	-0.574799				-0.195783
YBR275C	RIF1	TFIID	TATA-less
YBR276C	PPS1	TFIID		-0.0875548	0.0847293	-1.3819	-0.859142					-0.656212
YBR278W	DPB3	TFIID		-0.0875548	0.0847293	-1.3819	-0.85054					-0.654621
YBR279W	PAF1	TFIID	TATA-less	0.0954431	0.514405	-0.713117	-0.13285	-1.01002				-0.0906236
YBR280C	SAF1	TFIID		-0.0357483		-2.97125
YBR281C	DUG2	TFIID	TATA-less								-0.583785			-0.099693	-0.140642
YBR282W	MRPL27	TFIID	TATA-less	0.0655743	-0.235481	-1.15544	-1.04672					-0.398676
YBR283C	SSH1	TFIID	TATA-less	0.13343	0.000336089	-1.10728	-0.315762	-1.03418		-1.10491	-0.0936701	-0.323648		-0.0973419	-0.285684
YBR284W										-0.866768	0.197955			-0.423376	-0.511591
YBR285W				-0.141724	-0.447226		-1.27041	-1.49986			-1.18413	-0.66942		-0.0398386	-1.27148
YBR286W	APE3	CR	TATA-containing	-0.00294419	-0.0135976	-1.95205	-1.08644			-1.26311	-0.966891	-0.306004		0.437809	-0.986993
YBR287W	YBR287W	TFIID	TATA-containing	0.15637	-0.509316	-0.798899	-1.14583	-1.27423	-1.37722	-1.28752	-0.645757	-0.131787	-0.127433	-0.113333	-0.349359
YBR288C	APM3	TFIID		-0.161655	0.486311	-1.20224
YBR289W	SNF5	TFIID	TATA-less	-0.185892	0.480436	-1.28564
YBR290W	BSD2	TFIID	TATA-containing	0.211272	0.0331244	-1.29993	-0.277197	-0.701815				-0.177369
YBR291C				0.0310038	0.181639		-1.08463					-0.581104
YBR293W	VBA2	TFIID	TATA-less					-1.29829			0.21839			-0.23918	-0.278332
YBR294W
YBR295W	PCA1	TFIID	TATA-containing	-0.140606	0.195757	-0.682969				-0.305273	-0.744158			-0.280067	-0.505712
YBR296C	PHO89	CR	TATA-containing						-2.00341	-2.03017	-1.84148		-0.380149	-0.269222	-0.832848
YBR296C-A				-0.292728	-0.551956		-1.69638	-2.1998			-1.55348	-0.675436		-0.0998606	-0.500277
YBR297W				-0.268611	-0.543339		-1.62132	-2.1998			-1.55348	-0.642627		-0.0998606	-0.500277
YBR298C	MAL31	CR	TATA-containing							-1.68523
YBR298C-A
YBR299W				-0.245358	-0.438251		-1.63956	-1.61066		-1.68523	-0.521043	-0.280815		0.739914	-0.744184
YBR301W
YBR302C
YCL001W	RER1	TFIID	TATA-less	0.00375114	0.0474561	-0.977409	-0.910476	-0.859158			-0.0227796	-0.516922		0.727699	-0.639685
YCL001W-A
YCL001W-B
YCL002C	YCL002C	TFIID		0.00375114	0.0474561	-0.977409	-0.866865	-0.859158			-0.0227796	-0.504606		0.727699	-0.639685
YCL004W	PGS1	TFIID		0.00950478	0.0730934	-1.95541		-0.731823
YCL005W	LDB16	TFIID	TATA-containing	-0.0995086	-0.237699	-1.01485	-0.650197	-1.0561				-0.333825
YCL005W-A	VMA9	TFIID		0.163845	0.00865484	-1.08603	-0.54253	-0.907136			-0.0875805	-0.346296		-0.0345885	-0.574582
YCL008C	STP22	TFIID	TATA-less	-0.0190186	-0.112742	-1.16645	-0.786142	-1.1131			-0.371051	-0.357788		0.43557	-0.598115
YCL009C	ILV6	TFIID	TATA-less								0.114108			0.370009	0.368615
YCL010C	SGF29	TFIID	TATA-less	-0.0184226	0.0222168	-0.725347	-0.719839	-0.95957			-0.164557	-0.364591		0.887677	-0.552135
YCL011C	GBP2	TFIID	TATA-less	-0.0283745	0.714887	-0.375443	0.0685967	-0.830418				-0.05562
YCL012C	YCL012C	TFIID		-0.133094	0.552347	-1.1301
YCL014W	BUD3	TFIID	TATA-less	-0.194633	0.602871	-0.985616
YCL016C	DCC1	TFIID	TATA-less	-0.194633	0.560749	-0.985616
YCL017C	NFS1	TFIID	TATA-less	-0.164091	0.315961	-0.895262
YCL018W
YCL019W									-0.389443	-0.154328	-0.334685		-0.185181	0.206137	0.820987
YCL020W									-0.389443	-0.154328	-0.334685		-0.185181	0.206137	0.820987
YCL021W-A	YCL021W-A	CR
YCL024W	KCC4	TFIID	TATA-less
YCL025C	AGP1	CR	TATA-containing				-0.687674	-1.01034	-1.05925	-1.12503	-0.660374	-0.201769	-0.279747	0.199319	-0.22761
YCL026C-A	FRM2	CR
YCL026C-B	HBN1	CR		-0.111262	0.429875	-1.47751	-0.976184				-0.90182	-0.459467		0.437195	-0.526661
YCL027W	FUS1	CR	TATA-less
YCL028W	RNQ1	TFIID		0.00511572	0.410865	-1.81405
YCL029C	BIK1	TFIID	TATA-less	0.00511572	0.409473	-1.81405
YCL030C	HIS4	CR	TATA-containing	-0.146692	0.225593	-1.1949	-0.611557	-0.830372	-0.494288	-0.739144	-0.63993	-0.201914	-0.167575	-0.371454	-0.3948
YCL031C	RRP7	TFIID	TATA-less	-0.0212944	0.670782	-0.787424		-0.700623			0.161388			0.42268	-0.454509
YCL032W	STE50	TFIID	TATA-less	-0.117338		-2.21481
YCL033C				-0.117338
YCL034W	LSB5	TFIID	TATA-containing	0.0273193	-0.186324	-0.909993	-1.13642	-1.19747	-0.556649	-0.95447	-0.423049	-0.128001	-0.154256	-0.335297	0.0515286
YCL035C	GRX1	TFIID	TATA-containing	0.0273193	-0.186324	-0.909993	-1.13642	-1.12904	-0.562822	-0.985567	-0.364872	-0.128001	-0.148757	-0.281107	0.0162145
YCL036W
YCL037C	SRO9	TFIID	TATA-less
YCL038C	ATG22	TFIID	TATA-less
YCL039W	GID7	TFIID	TATA-less	-0.00662972	0.033532	-0.847019	-0.535488	-1.2063		-1.11257	-0.605045	-0.216572		0.063949	-0.790933
YCL040W	GLK1	CR	TATA-containing					-0.843175	-0.909725	-0.71281	-0.531417		-0.153264	0.0613046	0.532032
YCL042W							-0.291221	-0.91471		-0.856185	-0.370961	-0.183196		0.174932	0.304974
YCL043C	PDI1	CR	TATA-containing				-0.291221	-0.898358	-0.995835	-0.856185	-0.294292	-0.183196	-0.202451	0.509015	0.17291
YCL044C	MGR1	TFIID	TATA-less	0.125546	-0.308223	-1.1093	-1.05725	-1.36867		-0.62348	-0.197055	-0.251322		0.278818	-0.769383
YCL045C	EMC1	TFIID	TATA-containing	-0.0419135	0.00484503	-0.55521	-0.410824	-1.1272			0.167819	-0.169517		0.586099	-0.643565
YCL047C
YCL048W
YCL048W-A
YCL049C				-0.0766815	0.0424109		-1.27941	-1.2927				-0.619841
YCL050C	APA1	TFIID	TATA-less	0.0471709	0.271535	-1.07063	-0.489026	-1.0107	-0.824182		-0.4743	-0.215288	-0.307781	-0.405451	-0.412116
YCL051W	LRE1	TFIID	TATA-less	0.243026	0.354845	-1.8561	-0.437621	-0.67723				-0.083077
YCL052C	PBN1	TFIID		0.243026	0.354845	-1.8561	-0.437621	-0.676773				-0.083077
YCL054W	SPB1	TFIID	TATA-less
YCL054W-A
YCL055W	KAR4	CR	TATA-containing		0.818032
YCL056C	PEX34	TFIID	TATA-less	-0.0619787	0.458263	-1.27566
YCL057C-A	MIC10	TFIID	TATA-less	0.0209566		-0.790494	-0.243494	-0.706501				-0.420794
YCL057W	PRD1	TFIID	TATA-less	0.0527791	0.488448	-0.750962	-0.267901	-0.739393			0.354231	-0.190016		0.299002	0.0552634
YCL058C							-0.243494					-0.420794
YCL058W-A	ADF1	TFIID	TATA-less
YCL059C	KRR1	TFIID	TATA-less
YCL061C	MRC1	TFIID	TATA-less
YCL063W	VAC17	TFIID	TATA-less
YCL064C	CHA1	CR	TATA-containing
YCL066W				0.181594	-0.369102		-0.832712	-0.809168			-0.19759	-0.182694		0.662124	-0.211812
YCL067C				0.181594	-0.369102		-0.832712	-0.809329			-0.190752	-0.182694		0.659253	-0.203985
YCL068C
YCL069W
YCL073C
YCR002C	CDC10	TFIID	TATA-less	0.0114058	-0.011474	-0.380625	-0.146699	-1.27115			0.0923261	-0.182883		0.857116	-0.344214
YCR003W	MRPL32	TFIID	TATA-less	0.0114058	-0.011474	-0.380625	-0.148972	-1.27115			0.0923261	-0.183307		0.857116	-0.344214
YCR004C	YCP4	TFIID	TATA-containing	0.172427	-0.102248	-0.71264	-0.943639	-1.14611	-1.22615	-1.41677	-0.889763	-0.287269	-0.193836	0.226513	-0.124683
YCR005C	CIT2	CR	TATA-containing						-0.78271	-1.13161	-0.653879		-0.265427	0.268004	0.327038
YCR007C				-0.146155
YCR008W	SAT4	TFIID	TATA-containing				-0.24714	-0.732233	-0.795981	-1.18669	-0.176957	0.0258458	-0.0740083	0.366978	-0.25737
YCR009C	RVS161	TFIID	TATA-less	-0.02544	-0.247921	-0.864611	-0.528168	-1.15253	-0.341219	-0.728497	0.0305129	-0.122346	-0.226695	0.35378	0.052247
YCR010C
YCR011C	ADP1	TFIID	TATA-less	0.234919	-0.613597	-0.573884	-0.374588	-1.00482	-0.582629	-0.617446	-0.594658	-0.235456	-0.300144	-0.0233579	-0.116596
YCR012W	PGK1	CR	TATA-containing				-0.579583	-0.949281	-0.344504	-0.366367	-0.64183	-0.14315	-0.221135	0.045483	0.198872
YCR014C	POL4	TFIID
YCR015C	YCR015C	TFIID	TATA-less	0.103457	-0.420249	-1.80664			-0.42619	-0.705917			-0.389392
YCR016W	YCR016W	TFIID	TATA-less
YCR017C	CWH43	TFIID	TATA-less	-0.0894964	-0.456053	-1.05194	-1.2132	-1.46093	-1.15506		-0.796145	-0.224854	-0.329549	0.576883	0.0260911
YCR018C	SRD1	CR							-0.729969		-0.817827		-0.113709	1.29213	1.62167
YCR019W	MAK32	TFIID	TATA-less	0.142405	0.253651	-2.36509	-1.32189					-0.333537
YCR020C
YCR020C-A	MAK31	TFIID		-0.0485092	0.177309	-0.897687	-0.642474					-0.213415
YCR020W-B	HTL1	TFIID		0.2688	0.495311	-1.36964	-0.380995					0.032213
YCR021C	HSP30	CR	TATA-containing				-1.05977		-0.429585	-1.02703		-0.328955	-0.151504
YCR023C	YCR023C	TFIID	TATA-less	0.0541301	0.220955	-1.75004
YCR024C	SLM5	TFIID		0.0304489	-0.00825789	-2.02485
YCR024C-A	PMP1	CR	TATA-containing				-0.789881	-1.09388	-0.748343	-0.150149	-0.673006	-0.29098	-0.350674	0.509442	0.133934
YCR024C-B	YCR024C-B	CR							-0.748343	-0.150149			-0.350674
YCR026C	NPP1	TFIID	TATA-containing	-0.0634135	0.204611	-0.925311
YCR027C	RHB1	TFIID	TATA-less	0.0716994	0.0151945	-0.851413	-0.717214	-0.743231				-0.465136
YCR028C	FEN2	TFIID	TATA-containing	0.0724715	0.187495	-1.38098	-1.37242	-1.5039			-0.455954	-0.331114		0.129694	-0.583264
YCR028C-A	RIM1	TFIID	TATA-less	0.0776206	0.138702	-1.67756
YCR030C	SYP1	TFIID	TATA-less	0.332831	-0.0334357	-1.0118	-0.280967	-1.07947	-0.866623	-0.849987	-0.249693	-0.182776	0.143609	0.178346	-0.272929
YCR031C	RPS14A	TFIID	TATA-containing				-0.482385		-0.79043	-0.76487	0.0405921	-0.474611	-0.0568807	0.607241	-0.0136195
YCR032W	BPH1	TFIID		0.0370235	-0.363465	-1.31896		-0.845083
YCR033W	SNT1	TFIID	TATA-less	0.0438746	0.468975	-0.683087	0.415088	-0.582813			0.215394	-0.0546019		0.707536	-0.232912
YCR034W	ELO2	TFIID	TATA-less
YCR035C	RRP43	TFIID	TATA-less	0.0421681	0.209898	-0.491186	-0.859604	-0.629396			0.257627	-0.394283		0.446019	-0.0828173
YCR036W	RBK1	TFIID	TATA-less	0.0421681	0.209898	-0.491186	-0.859604	-0.629396			0.258413	-0.394283		0.446019	-0.0828173
YCR037C	PHO87	TFIID	TATA-less	0.0291855	-0.321288	-0.71109	-0.665379	-1.33592	-0.696947	-0.751029	-0.537423	-0.218598	0.115544	1.07895	-0.0386139
YCR038C	BUD5	TFIID
YCR039C				0.139267	-0.206623		-0.993861	-0.907828			-0.0306149	-0.252279		0.671183	-0.239899
YCR040W				0.139267	-0.206623		-0.993861	-0.907805			-0.043474	-0.252279		0.682084	-0.236164
YCR041W
YCR042C	TAF2	TFIID	TATA-less	0.077178	0.158135	-0.5778		-0.843143
YCR043C	YCR043C	TFIID	TATA-less	-0.010364	0.330026	-1.25717
YCR044C	PER1	TFIID	TATA-less	-0.070824	0.616145	-1.30145
YCR045C
YCR046C				-0.000167069	0.554987		-0.645982	-0.847789				-0.485419
YCR047C	BUD23	TFIID	TATA-less					-0.835264			-0.519746			0.457853	-0.308448
YCR048W	ARE1	TFIID	TATA-less					-0.837353			-0.519746			0.457853	-0.308448
YCR050C				-0.0209554	0.350756						-0.047826			0.81089	-0.705115
YCR051W	YCR051W	TFIID	TATA-less	-0.0218369	0.382861	-0.55753					-0.047826			0.81089	-0.705115
YCR052W	RSC6	TFIID	TATA-less	-0.0629829	0.370166	-1.01197
YCR053W	THR4	TFIID	TATA-less	-0.0271028	0.531446	-0.946739	0.158481	-0.74544			0.0469354	-0.0546115		0.373756	-0.273258
YCR054C	CTR86	TFIID	TATA-less
YCR057C	PWP2	TFIID	TATA-less
YCR059C	YIH1	TFIID
YCR060W
YCR061W										-0.295879	-0.0934552			0.251202	-0.2892
YCR063W	BUD31	TFIID	TATA-less	-0.0936208	-0.0124223	-0.611944	-0.629323					-0.423164
YCR065W	HCM1	CR	TATA-less							-0.482076	-0.506742			0.348562	0.162963
YCR066W	RAD18	TFIID	TATA-less
YCR067C	SED4	TFIID	TATA-less		-0.0279202
YCR068W	ATG15	TFIID	TATA-less	-0.0315893	-0.427297	-1.30322	-1.12621	-1.17411			-1.12332	-0.392564		-0.0560034	-0.373197
YCR069W	CPR4	TFIID	TATA-less	-0.184988	-0.261134	-1.16452	-0.537526	-1.14939			-0.359474	-0.165163		0.0766489	-0.246695
YCR071C	IMG2	TFIID	TATA-less	0.0684117	0.238743	-1.25917	-0.884738					-0.301629
YCR072C	RSA4	TFIID	TATA-less
YCR073C	SSK22	TFIID	TATA-less	-0.234489		-0.792298
YCR073W-A	SOL2	TFIID	TATA-less	-0.174645	0.167158	-1.84191
YCR075C	ERS1	TFIID	TATA-less	-0.0154855	0.646932	-1.45712
YCR075W-A	YCR075W-A	TFIID		0.00265603	0.283099	-2.31681
YCR076C
YCR077C	PAT1	TFIID	TATA-less	0.0890629	0.32879	-1.63957	-0.425318	-0.890067				-0.134751
YCR079W	PTC6	TFIID	TATA-less	0.0890629	0.32879	-1.63957	-0.425318	-0.890067				-0.134751
YCR081W	SRB8	TFIID	TATA-containing	-0.0254787	0.449453	-1.92995
YCR082W	AHC2	TFIID	TATA-containing	0.083702	0.297737	-0.90342	-0.628914	-0.72049			0.763832	-0.273974		0.728166	0.0267999
YCR083W	TRX3	TFIID	TATA-less	0.132108		-1.81354	-0.702406					-0.414911
YCR084C	TUP1	TFIID	TATA-less	0.129442	0.572257	-0.634016	0.230689	-0.496867				-0.289778
YCR086W	CSM1	TFIID	TATA-less		0.203725		-1.02653					-0.574454
YCR087C-A	YCR087C-A	TFIID	TATA-less
YCR088W	ABP1	TFIID	TATA-less	0.0158579	0.257303	-0.977502		-0.869563			0.0898107			1.54733	-0.459846
YCR089W	FIG2	TFIID	TATA-less	-0.181704		-1.75254
YCR090C	YCR090C	TFIID	TATA-less	0.00740614	0.730286	-1.7128
YCR091W	KIN82	TFIID		-0.0659205	-0.0786858	-2.06865	-1.12116	-1.29902			-0.730782	-0.273277		0.392236	-1.24173
YCR092C	MSH3	TFIID	TATA-less	0.0782283	0.389475	-0.847372		-0.421001			0.169657			0.547078	0.0543486
YCR093W	CDC39	TFIID	TATA-less	0.0782283	0.391272	-0.847372	-0.0715544	-0.426827			0.169657	-0.254667		0.547078	0.0543486
YCR094W	CDC50	TFIID	TATA-less	-0.0428116	0.285023	-0.841133
YCR095C	OCA4	TFIID	TATA-less	-0.12097	0.213409	-0.484073
YCR095W-A	YCR095W-A	TFIID	TATA-less	-0.104709	-0.0779826	-1.81894
YCR096C
YCR097W
YCR098C				-0.029011	-0.177871					-0.753349
YCR099C	YCR099C	TFIID
YCR100C	YCR100C	TFIID
YCR101C	YCR101C	TFIID
YCR102C	YCR102C	CR
YCR104W
YCR105W
YCR106W	RDS1	TFIID	TATA-less	0.0397484	0.456517	-1.4781
YCR107W	AAD3	TFIID
YDL001W	RMD1	TFIID	TATA-less	0.0604881	-0.09583	-0.591103	-0.699783	-1.07412			-0.0647755	-0.239589		0.783617	-0.593917
YDL002C	NHP10	TFIID	TATA-less	0.0604881	-0.09583	-0.591103	-0.699783	-1.07412			-0.0647755	-0.239589		0.783617	-0.593917
YDL003W	MCD1	CR	TATA-containing
YDL004W	ATP16	TFIID	TATA-less	-0.0510869	-0.017637	-1.18718	-0.824205	-0.889393		-0.3508	0.206614	-0.23097		0.175814	-0.341616
YDL005C	MED2	TFIID	TATA-less	0.0873863	0.155011	-0.590812	-0.300927	-0.615494			-0.126206	-0.198333		0.310636	-0.123761
YDL006W	PTC1	TFIID	TATA-less	0.0986972	0.115275	-1.10669	-0.415504	-0.548253			-0.848641	-0.464974		0.274093	-0.588811
YDL007C-A
YDL007W	RPT2	TFIID	TATA-less	0.325506	0.414943	-0.557489	0.0702855	-0.466025		-0.524081	0.607415	-0.212627		0.477783	0.102996
YDL008W	APC11	TFIID	TATA-less	-0.130488	-0.306916	-1.87642
YDL009C				-0.130488	-0.306916
YDL010W	GRX6	TFIID	TATA-less	-0.0288236	-0.547526	-0.672081	-0.417044	-0.979894	-0.580832	-0.4129	-0.181076	-0.286558	-0.228727	0.0697852	0.0396836
YDL012C	YDL012C	TFIID	TATA-containing	-0.0962108	-0.0971031	-0.865515	-0.635419			-0.373368	-0.189242	-0.302618		0.120861	-0.00725067
YDL013W	SLX5	TFIID	TATA-less	0.0834897	0.28216	-0.90605
YDL014W	NOP1	TFIID		0.122484	0.053821	-0.582643	-0.17154	-0.7367			0.129811	-0.00989081		0.723706	-0.423834
YDL015C	TSC13	TFIID	TATA-less	0.122484	0.053821	-0.582643	-0.17154	-0.73521			0.145021	-0.00989081		0.728822	-0.436745
YDL017W	CDC7	TFIID	TATA-less	-0.148403	0.0441591	-1.64133	-1.22134	-1.1167				-0.345208
YDL018C	ERP3	TFIID	TATA-less
YDL019C	OSH2	TFIID	TATA-less	-0.0988507	0.124028	-1.7997	-1.20441	-1.5401	-0.819417	-1.21884	-0.699747	-0.490684	-0.244176	-0.109288	-0.00165229
YDL020C	RPN4	CR	TATA-containing				-0.760832	-0.806342	-0.678676	-0.662296	-0.503979	-0.373093	-0.20681	0.22993	0.606207
YDL021W					-0.709912		-1.47013				-0.834567	-0.647795		-0.192727	-0.420875
YDL022C-A				-0.246985
YDL022W	GPD1	CR	TATA-containing					-0.712054	-0.800787	-0.794663	-0.399061		-0.230872	0.285051	-0.404889
YDL024C				-0.246985
YDL025C	RTK1	CR	TATA-less	-0.0162237	-0.185036	-1.16584	-0.839136	-1.27632	-0.696854	-1.25459	-0.554222	-0.18953	-0.189199	-0.0506259	-0.60033
YDL027C	YDL027C	TFIID	TATA-less	-0.00389189	0.419	-0.600304	-0.40064	-0.517493		-0.315205	-0.109571	-0.123545		0.555367	-0.412938
YDL028C	MPS1	TFIID	TATA-less		0.228399
YDL029W	ARP2	CR	TATA-less	0.123629	0.173365	-0.83184	-0.400007	-1.23416			-0.135624	-0.102763		0.665997	-0.23046
YDL030W	PRP9	TFIID	TATA-less	-0.0692192		-1.75868
YDL031W	DBP10	TFIID	TATA-less	-0.251372	0.399854	-0.246393
YDL033C	SLM3	TFIID	TATA-less	-0.251372	0.399854	-0.246393
YDL035C	GPR1	TFIID	TATA-containing	0.0148237	0.0325154	-0.509865	-0.499986	-0.810184		-0.541533	-0.249766	-0.2041		0.410275	-0.165935
YDL036C	PUS9	TFIID	TATA-less
YDL037C	BSC1	CR	TATA-less						-0.713191	-0.820635	-1.00917		-0.0173708	1.46319	0.891071
YDL039C	PRM7	CR
YDL040C	NAT1	TFIID	TATA-less	0.0321927	0.237769	-1.41308	-0.654749					-0.192656
YDL042C	SIR2	TFIID	TATA-less
YDL043C	PRP11	TFIID	TATA-less
YDL044C	MTF2	TFIID		-0.0289487	0.51095	-1.19097	-0.696094					-0.350866
YDL045C	FAD1	TFIID	TATA-less	-0.0493789	0.264745	-1.62449
YDL045W-A	MRP10	TFIID	TATA-containing	0.0494362	-0.375335	-1.07748	-0.59236	-0.784463			-0.367184	-0.221802		0.693569	-0.139958
YDL046W	NPC2	TFIID	TATA-containing	0.0716242	-0.171747	-0.548621	-0.828854	-1.20895	-0.855961	-1.07114	-0.516126	-0.10764	0.0570477	0.541106	-0.228021
YDL047W	SIT4	TFIID	TATA-less	-0.0127481	-0.717107	-0.774861	-0.523985	-1.09538		-0.684942	-0.465401	-0.293566		-0.0157118	0.313559
YDL048C							-0.757379	-1.21934	-1.01377	-1.25001	-0.712255	-0.273781	-0.197685	-0.158822	0.371615
YDL049C							-1.10473			-0.481638	-0.913478	-0.395093		-0.000650693	0.137271
YDL051W	LHP1	TFIID	TATA-less	0.0235204	0.142479	-0.670501	-0.622468	-1.11013		-0.444535	0.178917	-0.211414		0.0921738	0.143069
YDL052C	SLC1	TFIID	TATA-less	0.0235204	0.142479	-0.670501	-0.629916	-1.11013		-0.434812	0.178917	-0.210929		0.0921738	0.143069
YDL053C	PBP4	TFIID	TATA-containing	0.0447678	0.227462	-0.143332	-0.292521	-0.784464		-0.474687	-0.265326	-0.10038		0.93449	-0.530424
YDL054C	MCH1	TFIID	TATA-less	-0.295063	0.100683	-0.77901	-0.845479	-0.828496			-0.0970385	-0.347933		0.526943	-0.694196
YDL055C	PSA1	CR	TATA-containing				-0.545957	-0.9792	-0.393832	-0.107313	-0.291417	-0.218942	-0.274615	-0.000485218	0.0780218
YDL056W	MBP1	TFIID	TATA-less	-0.0563634	0.456554	-1.34381	-0.656986					-0.421044
YDL057W
YDL058W	USO1	TFIID	TATA-less	0.0523193	0.316582	-1.21061	-1.00142	-1.06778				-0.530029
YDL059C	RAD59	TFIID	TATA-less		0.0985299
YDL060W	TSR1	TFIID	TATA-less					-0.38112		-0.230772	0.153448			0.502473	0.100814
YDL061C	RPS29B	TFIID	TATA-less				-0.0209158	-0.381854		-0.241941	0.153448	-0.233829		0.502473	0.100814
YDL063C	SYO1	TFIID	TATA-less
YDL064W	UBC9	TFIID		-0.0722509	0.381196	-1.29095	-0.630426					-0.535689
YDL065C	PEX19	TFIID	TATA-less	-0.0722509	0.381196	-1.29095	-0.633429					-0.544502
YDL066W	IDP1	CR	TATA-less	-0.0237039	-0.198241	-1.04554	-0.962517	-1.27605			0.166774	-0.373297		0.185575	0.0479422
YDL067C	COX9	TFIID	TATA-less	-0.0237039	-0.198241	-1.04554	-0.962517	-1.26061			0.179621	-0.373297		0.29925	-0.0493657
YDL069C	CBS1	TFIID		-0.0477401	-0.976802	-2.55647
YDL070W	BDF2	CR	TATA-containing					-1.00553	-0.46328	-0.285878			-0.152803
YDL072C	YET3	TFIID	TATA-containing				-0.461434	-1.0112	-0.347098	-0.283453	-0.175877	-0.379533	-0.109364	-0.0888423	0.0388989
YDL073W	YDL073W	TFIID	TATA-less	0.0492716	-0.0664639	-0.435044	-0.290089	-0.574163			0.336244	-0.27626		0.51829	-0.530267
YDL074C	BRE1	TFIID	TATA-less	0.0492716	-0.0664639	-0.435044	-0.290089	-0.911539			0.332135	-0.27626		0.501303	-0.521406
YDL075W	RPL31A	TFIID	TATA-less				-0.231569	-0.487506		-0.662622	0.072403	-0.5396		-0.184453	-0.0480092
YDL076C	RXT3	TFIID		0.0182258		-1.00381	-0.71842	-0.833117		-0.641059	0.0797804	-0.3336		-0.186518	-0.0475325
YDL077C	VAM6	TFIID	TATA-less	-0.0142173	0.103238	-1.79117	-0.767865				-0.625503	-0.407516		0.494275	-0.6629
YDL078C	MDH3	TFIID	TATA-containing	-0.0694104	-0.202923	-1.63255	-1.21898	-0.989047			-0.635662	-0.609946		0.611094	-0.769061
YDL079C				-0.0471809	0.227377		-1.5574	-1.66988	-1.90086	-2.01166	-1.14013	-0.3429	-0.6578	-0.15677	-0.722976
YDL080C	THI3	TFIID	TATA-less	0.147841	0.24241	-1.09189	-1.11711	-1.10025			-0.41351	-0.486246		0.640233	-0.736749
YDL081C	RPP1A	TFIID	TATA-less	-0.112528	0.0449195	-0.322013	-0.708091	-0.63714			0.0735149	-0.317335		0.714634	-0.252239
YDL082W	RPL13A	TFIID	TATA-less				-0.329835	-0.62994		-0.537487	0.0300171	-0.460022		-0.0890327	-0.0826597
YDL083C	RPS16B	TFIID	TATA-less					-0.539807		-0.537487	0.00627924			-0.0420676	-0.100013
YDL084W	SUB2	TFIID	TATA-less	-0.0182032	0.3838	-0.460945	-0.363424	-1.00748		-0.826956	0.362632	-0.099923		0.0367152	-0.473804
YDL085C-A	YDL085C-A	TFIID	TATA-less	-0.208701	-0.283352	-1.33107		-1.10665			-0.906596			-0.109117	-1.00287
YDL085W				-0.208701	-0.283352			-1.11538			-0.876964			-0.113228	-1.01093
YDL086W	YDL086W	TFIID	TATA-containing	-0.048625	-0.0534316	-1.18324	-1.2106	-1.02596			-0.581162	-0.527991		-0.223067	-0.391897
YDL087C	LUC7	TFIID	TATA-less	-0.048625	-0.0534316	-1.18324	-1.21082	-1.06153			-0.319866	-0.528483		-0.117497	-0.25638
YDL088C	ASM4	TFIID	TATA-less	-0.0049141	0.412982	-1.37058	-0.26517	-0.450735				-0.174003
YDL089W	NUR1	TFIID	TATA-less	0.0857253	0.00217604	-1.84024	-1.44465	-1.02703				-0.489594
YDL090C	RAM1	TFIID		0.0857253	0.00217604	-1.84024	-1.44465	-0.977064				-0.489594
YDL091C	UBX3	TFIID	TATA-less	0.106402	0.410809	-1.51513	-0.834322					-0.378976
YDL092W	SRP14	TFIID	TATA-less	0.0570901	0.403111	-1.08868	-0.77465	-1.37422				-0.204489
YDL093W	PMT5	TFIID	TATA-less	-0.279893	0.437867	-1.82301
YDL095W	PMT1	TFIID	TATA-less	0.101551	0.203378	-0.650734	-0.392884	-0.776376			0.390354	-0.209889		0.695769	0.0980829
YDL097C	RPN6	TFIID	TATA-less	0.101551	0.452812	-0.650734	-0.291485	-0.776376			0.390354	-0.0849418		0.695769	0.0980829
YDL098C	SNU23	TFIID		0.0355237	0.358855	-1.71994
YDL099W	BUG1	TFIID		0.0319639	0.565554	-1.36609
YDL100C	GET3	TFIID	TATA-less	0.0319639	0.565554	-1.36609
YDL101C	DUN1	TFIID	TATA-less
YDL102W	POL3	TFIID	TATA-containing	-0.00149347	0.603434	-1.67252
YDL103C	QRI1	TFIID	TATA-less	-0.00149347	0.603434	-1.67252
YDL104C	QRI7	TFIID	TATA-less
YDL105W	NSE4	TFIID	TATA-less	0.0102013	0.309176	-0.740301	-1.16698	-1.57562				-0.378652
YDL106C	PHO2	TFIID	TATA-less	0.0102013	0.203477	-0.740301	-1.167	-1.47635				-0.379363
YDL107W	MSS2	TFIID
YDL108W	KIN28	TFIID	TATA-less
YDL109C	YDL109C	TFIID
YDL110C	TMA17	CR	TATA-containing				-0.810226	-1.23459		-0.598921	-0.417169	-0.400944		0.628507	-0.670812
YDL111C	RRP42	TFIID	TATA-less	-0.0644898	0.304976	-0.491629	-0.944791	-0.965462			-0.429431	-0.521578		0.0782453	-0.715762
YDL112W	TRM3	TFIID	TATA-less	0.118806	0.0831471	-1.14887	-0.214228	-0.596042				-0.0636328
YDL113C	ATG20	TFIID		0.118806	0.0831471	-1.14887	-0.225692	-0.596042				-0.0638968
YDL114W
YDL115C	IWR1	TFIID	TATA-less	0.00613184	0.256954	-1.34013	-0.160169					-0.312859
YDL116W	NUP84	TFIID	TATA-less	-0.0607106	0.394216	-0.670215	-0.0542664	-0.911907				-0.190869
YDL117W	CYK3	CR	TATA-less	0.194824	-0.0778027	-1.66801	-1.23617	-1.32572			-0.643991	-0.330426		0.436253	0.0373638
YDL119C	YDL119C	TFIID	TATA-less	0.0547266	-0.311112	-3.06439	-1.42404					-0.295698
YDL120W	YFH1	TFIID	TATA-less	0.104587	0.0191065	-0.752849	-0.86084	-0.947274			0.241831	-0.28948		0.316509	-0.0223016
YDL121C	YDL121C	TFIID	TATA-less	0.104587	0.0191065	-0.752849	-0.86084	-0.947274			0.224424	-0.28948		0.319924	-0.00937276
YDL122W	UBP1	TFIID					-0.685532	-1.11111		-0.667997	-0.326473	-0.289689		0.125504	-0.477435
YDL123W	SNA4	CR	TATA-containing								-0.895514			0.168749	-0.194118
YDL124W	YDL124W	CR	TATA-containing					-1.01776	-0.763774	-0.867908	-0.439164		-0.254157	-0.0865714	0.316152
YDL125C	HNT1	CR	TATA-less	-0.1871		-0.96754	-0.95275		-0.620609	-0.62254		-0.416059	-0.291447
YDL126C	CDC48	TFIID	TATA-less	-0.068404	-1.06029	-1.15555	-0.721977	-1.00044	-0.750668	-0.789241	0.100703	-0.318288	-0.147679	0.510497	-0.246102
YDL127W	PCL2	CR	TATA-containing				-0.643239		-0.70883	-0.347009	-0.450455	-0.486064	-0.305693	0.1923	0.190641
YDL128W	VCX1	TFIID	TATA-less				-0.696126	-0.891452			-0.495033	-0.285928		0.748777	-0.279799
YDL129W	YDL129W	TFIID	TATA-less
YDL130W	RPP1B	TFIID	TATA-less				-0.434597	-0.590447		-0.712465	-0.136029	-0.33085		0.376452	-0.158935
YDL130W-A	STF1	TFIID	TATA-less	0.268168	-0.214717	-1.32902	-0.854386	-0.19518		-0.0722295	0.105047	-0.190907		0.125362	-0.286907
YDL131W	LYS21	TFIID	TATA-containing	-0.188323	-0.0792965	-1.00649		-0.77654			-0.242995			0.260758	0.165855
YDL132W	CDC53	TFIID		0.0576982	-0.178036	-0.738004	-0.0178549	-0.717016		-0.592347	-0.502657	-0.0639867		0.456393	-0.119453
YDL133C-A	RPL41B	TFIID	TATA-containing				-0.564218	-0.7324	-0.785508	-0.407906	-0.429771	-0.312829	-0.219187	0.109591	0.0850455
YDL133W	SRF1	TFIID		-0.106136	-0.0607159	-0.707023		-0.598537	-0.858744	-0.407906	-0.429771		-0.193082	0.109591	0.0850455
YDL134C	PPH21	TFIID		0.182903		-0.754544	-0.377952	-0.978717		-0.77141	-0.400503	-0.27731		0.549318	-0.413554
YDL135C	RDI1	TFIID	TATA-less	0.0208798		-1.49837					-0.681012			0.467039	-0.627778
YDL136W	RPL35B	TFIID	TATA-less					-0.531125	-0.502802	-0.608391	-0.410402		-0.0365997	0.413119	0.0739961
YDL137W	ARF2	TFIID		0.0716515	-0.271073	-1.14911	-0.504825	-1.4262	-1.01295	-1.21238	-1.2398	-0.235894	-0.23859	-0.29972	-0.6047
YDL138W	RGT2	TFIID	TATA-less					-0.755092		-0.689079	-0.669807			-0.13179	-0.396324
YDL139C	SCM3	TFIID	TATA-less	-0.1207		-0.616567					-0.185874			0.78105	-0.412663
YDL140C	RPO21	TFIID		0.167924	0.133418	-0.687402	-0.176498	-0.631397		-0.600019	-0.291894	-0.259784		0.330448	-0.00360356
YDL141W	BPL1	TFIID	TATA-less	-0.0371745	0.449751	-1.58915
YDL142C	CRD1	TFIID		-0.0371745	0.452839	-1.58915
YDL143W	CCT4	TFIID	TATA-less	0.0194462	-0.354747	-1.05529	-0.833064	-0.572143			0.227736	-0.392012		1.09873	-0.202041
YDL144C				0.0194462	-0.354747		-0.833064	-0.582541			0.227736	-0.392012		1.09873	-0.202041
YDL145C	COP1	TFIID	TATA-less	0.059689	0.159865	-1.00607	-0.982279	-0.872396			-0.647822	-0.230417		-0.105867	-0.242634
YDL146W	LDB17	TFIID	TATA-less	0.118849	0.317221	-1.57498	-0.292672					-0.277583
YDL147W	RPN5	TFIID	TATA-less	0.145102	0.742314	-0.348918	1.13198					0.211974
YDL148C	NOP14	TFIID	TATA-less	0.145102	0.742314	-0.348918	1.13065					0.214826
YDL149W	ATG9	TFIID		-0.15432	0.103613	-1.54324
YDL150W	RPC53	TFIID	TATA-less
YDL153C	SAS10	TFIID	TATA-less
YDL154W
YDL155W	CLB3	TFIID	TATA-less	0.00801437	0.223323	-0.864955	-0.347235	-0.486108			0.0502324	-0.376775		0.489481	-0.17355
YDL156W	CMR1	TFIID	TATA-less	-0.00439517		-0.818347
YDL157C	YDL157C	TFIID	TATA-less	-0.00039849		-0.80476
YDL159W	STE7	TFIID	TATA-less	0.425669	0.736471	-0.56084	0.232284	-0.743389			0.412514	0.0318975		0.353072	-0.236644
YDL159W-A				0.378933	0.613648		1.23838					0.234049
YDL160C	DHH1	TFIID	TATA-less	0.425669	0.736471	-0.56084	0.232284	-0.743389			0.412514	0.0318975		0.353072	-0.236644
YDL160C-A	MHF2	TFIID	TATA-less	-0.0139426	0.472531	-1.39914
YDL161W	ENT1	TFIID	TATA-less	-0.113996	0.679723	-0.690192		-0.788256
YDL164C	CDC9	TFIID	TATA-less	-0.172457		-0.791404		-0.668254
YDL165W	CDC36	TFIID		0.0302942	0.5725	-0.936121
YDL166C	FAP7	TFIID	TATA-containing	0.0169939	0.573639	-0.945683
YDL167C	NRP1	TFIID	TATA-less
YDL168W	SFA1	CR	TATA-less	-0.134659	0.0501549	-0.473373				-0.605716	-0.538644			0.429773	-0.791817
YDL169C				-0.197709	0.0782904						-0.556108			0.308511	-0.727745
YDL170W	UGA3	CR	TATA-less	-0.131414		-0.589024		-1.04057	-0.692681	-0.673957	-0.128139		0.172733	0.191868	-0.235191
YDL171C	GLT1	TFIID	TATA-less	-0.130608	-0.406761	-0.587496	-0.38622	-1.05131	-0.889906	-0.674033	-0.879855	-0.226005	0.0629524	0.117519	-0.381106
YDL173W	PAR32	TFIID	TATA-less	0.041019	0.163306	-0.673079	-0.848345	-1.21915	-0.613956	-0.750256	-0.18469	-0.170075	-0.249782	-0.541066	-0.246124
YDL174C	DLD1	TFIID	TATA-containing		-0.715977		-0.702644	-1.08865	-0.604878	-0.587978	-0.670948	-0.299873	-0.239904	-0.217357	-0.208629
YDL175C	AIR2	TFIID	TATA-less	-0.0287159	0.221474	-1.05731	-0.228138	-0.947902			-0.48153	-0.530145		0.049402	-0.551591
YDL176W	YDL176W	TFIID	TATA-less	-0.030825	0.324713	-1.43371	-0.740796	-0.684598			-0.475307	-0.248732		0.954971	-0.418522
YDL177C	YDL177C	TFIID	TATA-less	-0.030825	0.324713	-1.43371	-0.704265	-0.624746			-0.450428	-0.248653		0.947405	-0.407241
YDL178W	DLD2	TFIID	TATA-less	0.0491476	-0.113023	-2.20162	-0.832519					-0.287305
YDL179W	PCL9	CR	TATA-less	0.010513	0.369928	-1.22377		-0.375547		-0.875193	-0.832399			-0.284051	0.116329
YDL180W	YDL180W	CR	TATA-less	0.0979544	-0.366209	-0.965994	-0.667561				-0.194827	-0.435189		0.242099	-0.453438
YDL181W	INH1	TFIID	TATA-less	0.0784348	-0.627188	-0.875102	-1.04242	-1.40655		-0.963403	-0.536185	-0.344285		0.399291	-0.439752
YDL182W	LYS20	CR	TATA-containing	0.0956517	-0.60522	-0.458169	-0.849552		-0.782113	-0.926701		-0.588604	-0.0131475
YDL183C	YDL183C	CR									-1.00604			0.975713	-0.583571
YDL184C	RPL41A	TFIID	TATA-less	-0.0517734	-0.543913	-1.07513	-0.2938	-0.724618		-0.945323	-0.558484	-0.372798		0.219869	-0.261445
YDL185W	VMA1	TFIID	TATA-less				0.516501					0.00577487
YDL186W
YDL188C	PPH22	TFIID	TATA-containing	-0.0583738	0.278026	-1.10602	-0.534666	-0.713385			0.0970251	-0.308983		0.259014	-0.143318
YDL189W	RBS1	TFIID	TATA-less	0.124004	0.24828	-0.726116	-0.614159	-0.857723			0.312549	-0.269792		0.265008	-0.471064
YDL190C	UFD2	TFIID	TATA-less	0.124004	0.24828	-0.726116	-0.614159	-0.857723			0.312549	-0.269792		0.265008	-0.471064
YDL191W	RPL35A	TFIID	TATA-less				-0.327175	-0.811002		-0.544685	-0.238537	-0.265305		0.414362	0.282063
YDL192W	ARF1	TFIID	TATA-less	-0.00910572	-0.345516	-0.825605	-0.483412	-1.10387		-0.894919	-0.888572	-0.250576		0.249313	-0.551889
YDL193W	NUS1	TFIID	TATA-less	-0.0879137	-0.298973	-1.00228	-0.859186					-0.283115
YDL194W	SNF3	TFIID	TATA-less	0.0371618	0.483946	-1.28568					-0.230684			0.786167	-0.919674
YDL195W	SEC31	TFIID			0.0231924		-0.0752161		-0.700369	-0.841829	-0.78849	-0.325394	-0.150865	-0.410383	-0.703067
YDL197C	ASF2	TFIID	TATA-less	-0.0740757	-0.0711525	-1.63212	-0.787959	-0.905316			-0.25799	-0.4503		0.399587	-0.452956
YDL198C	GGC1	CR	TATA-less	0.00321103	-0.390027	-0.957349		-1.01549			0.186348			0.104469	-0.151829
YDL199C	YDL199C	TFIID		-0.0908767	0.272448	-1.35286					-0.436868			0.706635	-0.727308
YDL200C	MGT1	TFIID		-0.152751		-1.4896
YDL201W	TRM8	TFIID	TATA-less
YDL202W	MRPL11	TFIID	TATA-less	-0.00318262	0.180587	-0.686757
YDL203C	ACK1	TFIID	TATA-less	0.000322588	0.24767	-0.648543	-0.965332					-0.653018
YDL204W	RTN2	CR	TATA-less		-0.350942					-0.976508	-0.550033			0.219999	-0.226782
YDL205C	HEM3	CR	TATA-less	0.0813227	-0.123712	-1.46249	-1.15205	-1.30224			-0.622613	-0.308323		0.431571	-0.556843
YDL206W	YDL206W	TFIID		0.0560154	0.292051	-2.34484	-1.04341					-0.596266
YDL207W	GLE1	TFIID	TATA-less	-0.0492477	0.288462	-0.372182	-0.355055				-0.0841182	-0.252792		0.852839	-0.447978
YDL208W	NHP2	TFIID	TATA-less	-0.0417925	0.328263	-0.469162	-0.11958	-0.535724			0.121819	-0.210458		0.81877	-0.393382
YDL209C	CWC2	TFIID	TATA-less	-0.0417925	0.328263	-0.469162	-0.135518	-0.535724			0.126238	-0.259045		0.814081	-0.396534
YDL210W
YDL211C	YDL211C	TFIID			0.43927
YDL212W	SHR3	TFIID	TATA-containing	-0.176197	0.0972108	-0.661682	-0.741486	-0.630978				-0.579004
YDL213C	NOP6	TFIID	TATA-less	-0.176197		-0.661682		-0.604247
YDL214C										-0.945174	-0.740429			0.540854	-0.649069
YDL215C	GDH2	TFIID	TATA-less	-0.146705	-0.134555	-0.782623	-1.02277	-0.980377		-1.0601	-0.6474	-0.230716		-0.0695571	-0.48688
YDL216C	RRI1	TFIID		0.0177196	0.373802	-1.90529					-1.32946			0.327633	-1.51721
YDL217C	TIM22	TFIID	TATA-less	-0.147084	0.258319	-0.779563	-0.337932	-0.81715			-0.0912294	-0.343876		0.286667	-0.566501
YDL218W
YDL219W	DTD1	TFIID	TATA-less
YDL220C	CDC13	TFIID
YDL222C				-0.308995	0.0147014		-0.821524		-0.808733	-1.36909	-0.982687	-0.647634	-0.202472	-0.249197	-1.03541
YDL223C
YDL224C	WHI4	TFIID	TATA-less		0.179589
YDL225W	SHS1	TFIID	TATA-less	-0.0073919	0.134675	-0.764497	-0.548335	-0.729129			0.0545065	-0.268954		0.307367	-0.216653
YDL226C	GCS1	TFIID	TATA-less	-0.0073919	0.134675	-0.764497	-0.543617	-0.729129			0.0545065	-0.268875		0.307367	-0.216653
YDL227C	HO	CR	TATA-less
YDL229W	SSB1	TFIID	TATA-containing				0.00169622			-0.333961	0.163919	-0.401202		0.258925	-0.307558
YDL230W	PTP1	TFIID	TATA-less	-0.0388977	0.166824	-0.560278
YDL231C	BRE4	TFIID	TATA-less	-0.0388977	0.0712238	-0.560278	-0.392091					-0.246383
YDL232W	OST4	TFIID	TATA-less	-0.0195565	0.0411493	-0.968759	-0.544423	-0.886235			-0.0547453	-0.388659		0.315414	-0.809214
YDL233W	MFG1	TFIID		0.0679281	0.388868	-1.52216	-0.790571	-1.07913		-0.696182	0.196258	-0.104869		0.0378867	-0.554464
YDL234C	GYP7	TFIID		0.0683375	0.388868	-1.52216	-0.80329	-1.09002		-0.696056	0.196258	-0.100877		0.0378867	-0.554464
YDL235C	YPD1	TFIID	TATA-less	-0.0343953	0.301447	-0.691232	-0.72789	-1.01091			-0.247367	-0.113951		0.52537	-0.731334
YDL236W	PHO13	TFIID	TATA-less	0.0275968	0.127827	-0.765696	-0.660713				0.0260602	-0.587508		0.856398	-0.745728
YDL237W	AIM6	TFIID		0.0760063	0.0264176	-2.52484	-1.15929	-0.96297				-0.529894
YDL238C	GUD1	TFIID		0.0760063	0.0264176	-2.52484	-1.15929	-0.961542				-0.529894
YDL239C	ADY3	TFIID
YDL240W	LRG1	TFIID	TATA-less	0.10686	0.178046	-1.58165	-1.46543	-1.42116				-0.245226
YDL241W	YDL241W	TFIID	TATA-containing	-0.162657	0.0831273	-1.066					-0.648586			-0.324491	-0.49707
YDL243C	AAD4	CR
YDL244W				-0.0306592
YDL245C
YDL246C
YDL247W
YDL248W	COS7	TFIID
YDR001C	NTH1	CR	TATA-containing	0.0881798	-0.615289	-0.848286	-0.663463	-0.836528		-0.640127	-0.299461	-0.226213		0.239704	0.0717071
YDR002W	YRB1	TFIID	TATA-less					-0.836528		-0.640127	-0.299461			0.239704	0.0717071
YDR003W	RCR2	TFIID	TATA-less	-0.11528	-0.511383	-0.473132	-0.783173	-0.973608	-0.809707	-0.84519	-0.213824	-0.228972	-0.130475	0.00736427	-0.323616
YDR003W-A	YDR003W-A	TFIID
YDR004W	RAD57	TFIID	TATA-less	-0.0717428	-0.173139	-1.5209
YDR005C	MAF1	TFIID	TATA-less	0.0305984	-0.173168	-1.22022	-0.405414				-0.585971	-0.253697		0.555703	-0.571414
YDR006C	SOK1	TFIID	TATA-less	-0.0886726	-0.316846	-0.859985	-0.320626	-0.717894	-0.906365	-0.528346	-0.664903	-0.263783	-0.453431	0.165763	-0.268958
YDR007W				0.0747455	-0.177475		-0.877575	-1.06425	-0.641539	-0.191386	-0.355482	-0.377047	-0.256535	0.447512	0.158158
YDR009W
YDR011W	SNQ2	CR	TATA-containing						-0.348365	-0.520979	-1.09376		-0.207569	0.194813	0.456768
YDR012W	RPL4B	TFIID	TATA-less	-0.101784	0.138103	-1.10271	-1.12742	-1.04293				-0.24522
YDR013W	PSF1	TFIID	TATA-less	-0.0326298	0.630676	-1.45563
YDR014W	RAD61	TFIID			0.474818
YDR014W-A
YDR016C	DAD1	TFIID	TATA-less	-0.167913	0.535546	-1.10528
YDR017C	KCS1	TFIID		-0.125203		-1.46983	-0.883731	-0.737395			-1.71015	-0.365714		0.457004	-0.847261
YDR018C											-0.970039			0.414699	-0.771161
YDR019C	GCV1	CR	TATA-containing	-0.162133	-0.637223	-1.69244
YDR020C	DAS2	TFIID	TATA-less
YDR021W	FAL1	TFIID
YDR022C	ATG31	TFIID	TATA-less
YDR023W	SES1	TFIID	TATA-containing	-0.120234		-0.512414	-0.495949	-0.82365		-0.467666	-0.391268	-0.317927		0.361671	0.063225
YDR025W	RPS11A	TFIID	TATA-less				-0.453673	-0.585589			-0.10732	-0.528499		0.275968	0.0208413
YDR026C	NSI1	TFIID
YDR027C	VPS54	TFIID	TATA-less	-0.00926418	0.326033	-0.522967	-0.62951	-1.06863				-0.148215
YDR028C	REG1	TFIID	TATA-less	-0.0263499	-0.0113622	-0.745138	-0.909371	-1.23895		-0.409892	0.153217	-0.249571		-0.00661578	-0.100157
YDR030C	RAD28	TFIID		0.0259437	0.41496	-1.49187	-0.907737				-0.425138	-0.148426		1.32038	-0.616048
YDR031W	MIX14	TFIID		0.0259437	0.41496	-1.49187	-0.907737				-0.425138	-0.148426		1.32038	-0.616048
YDR032C	PST2	CR	TATA-containing	0.0197109	0.173866	-0.966038	-1.07878	-0.876925		-1.16318	-0.647911	-0.140342		0.324415	-0.403362
YDR033W	MRH1	CR	TATA-containing						-0.371287	-0.00104846			-0.160443
YDR034C	LYS14	TFIID	TATA-less					-1.29338			-0.578402			0.273631	-0.122208
YDR034C-A									-0.748525	-0.710269	-0.531611		-0.107486	-0.0988197	-0.143227
YDR034C-C					-0.0992679				-0.575273	-0.118985			-0.246269
YDR034C-D					-0.0992679				-0.575273	-0.118985			-0.246269
YDR034W-B								-0.634186	-0.616503	-0.217056	0.134437		-0.0477646	-0.321471	-0.274938
YDR035W	ARO3	TFIID	TATA-less	0.0743219	-0.171184	-0.654463	-0.887859	-0.832546	-0.807155	-0.995682	-0.418654	-0.318777	0.0097166	-0.450749	-0.144753
YDR036C	EHD3	TFIID	TATA-less	-0.113339	-0.695859	-0.91268	-1.42103	-1.90829	-0.594341	-0.53644	-0.719399	-0.487157	-0.350987	-0.11376	-0.240817
YDR037W	KRS1	CR	TATA-containing						-0.630942	-0.651041	-0.534383		-0.311791	-0.116838	-0.254676
YDR038C				0.135129	0.346702		-1.07842	-0.949204			-0.549356	-0.335854		-0.104854	-0.885011
YDR039C				0.0758846	0.280856		-0.976814				-0.445515	-0.366801		-0.132626	-0.881346
YDR040C									-1.70599		-1.65285		-0.429713	-0.132413	-0.235313
YDR041W	RSM10	TFIID	TATA-less	-0.151775	-0.0486577	-0.652408	-0.843095	-1.21899	-1.38499	-1.89034	-0.774891	-0.433121	-0.373868	0.102425	-0.218785
YDR042C
YDR043C	NRG1	CR	TATA-containing				-0.770182			-0.996375	-0.665132	-0.435926		0.278298	0.643639
YDR044W	HEM13	TFIID	TATA-containing
YDR045C	RPC11	TFIID	TATA-less	-0.332808		-1.04267
YDR046C	BAP3	CR	TATA-less				-0.489284	-1.05044		-0.897204	-0.68702	-0.210095		0.155121	0.428613
YDR047W	HEM12	TFIID	TATA-less	-0.0738294	-1.48697	-0.8486	-0.89833			-0.979201	-0.686359	-0.483384		0.172686	0.322122
YDR049W	VMS1	TFIID	TATA-less	-0.121687	-0.143487	-1.17805
YDR050C	TPI1	CR	TATA-less				-0.641733	-0.793143	-0.0225058	-0.199866	-0.204367	-0.355838	-0.224136	0.205775	0.0590214
YDR051C	DET1	TFIID	TATA-less	-0.0687759	0.00892789	-0.714209
YDR052C	DBF4	TFIID	TATA-less	-0.0606557	0.0512565	-0.286955					-0.170165			1.09197	-0.637352
YDR054C	CDC34	TFIID	TATA-less	-0.0859586	-0.517217	-0.602278	-0.653504	-1.26941	-0.821078	-0.730599	-0.516764	-0.217757	-0.0228935	0.135061	-0.204787
YDR055W	PST1	CR	TATA-containing				-0.935488			-0.233523		-0.395893
YDR056C	YDR056C	TFIID	TATA-containing	-0.106488	0.27055	-1.03698	-1.06834					-0.520475
YDR057W	YOS9	TFIID	TATA-less	-0.106488	0.27055	-1.03698	-1.07116					-0.514011
YDR058C	TGL2	TFIID		-0.175583	-0.32413	-1.0011				-0.621279	-0.267305			0.0168344	-0.676177
YDR059C	UBC5	TFIID	TATA-containing	-0.0170309	-0.196996	-1.26201	-0.938314					-0.361128
YDR060W	MAK21	TFIID
YDR061W	YDR061W	TFIID	TATA-less	-0.0514319	-0.496445	-0.837513	-0.509282	-0.791371			-0.466639	-0.5765		0.198952	-0.0997746
YDR062W	LCB2	TFIID	TATA-less	0.0863075	-0.414216	-0.371934	-0.701711	-1.0973	-0.542848	-0.744645	-0.103083	-0.343118	-0.0372978	0.429197	-0.0987845
YDR063W	AIM7	TFIID		0.00166153	-0.301031	-1.02872	-0.746125				-0.226028	-0.239941		0.958403	-0.741816
YDR064W	RPS13	TFIID	TATA-less	-0.103443		-0.307654	-0.436174	-0.685316		-0.754242	-0.106617	-0.282484		0.686163	0.238525
YDR065W	RRG1	TFIID
YDR066C	RTR2	TFIID
YDR067C	OCA6	TFIID		0.0700065	0.416307	-1.42298	-0.761564	-0.664845				-0.224125
YDR068W	DOS2	TFIID	TATA-less	0.0700065	0.416307	-1.42298	-0.761564	-0.664567				-0.224125
YDR069C	DOA4	CR	TATA-less	0.0258238	0.0769308	-0.841359	-0.715563	-1.02163			-0.00139118	-0.171088		0.636802	-0.437304
YDR070C
YDR071C	PAA1	TFIID	TATA-less	0.055691	-0.151576	-0.605558	-0.783828	-1.1171			-0.315113	-0.115651		0.33501	0.138953
YDR072C	IPT1	CR	TATA-less				-0.542491	-0.725682	-0.84624	-0.921844	-0.191163	-0.240319	-0.026649	0.38084	0.118619
YDR073W	SNF11	CR	TATA-containing				-0.755559	-0.802875	-1.1405	-0.952774	-0.535833	-0.474739	-0.144964	-0.0530399	0.287849
YDR074W	TPS2	CR	TATA-less					-1.25216	-1.58188	-1.19708	-0.748725		-0.199874	0.012738	0.178389
YDR075W	PPH3	TFIID	TATA-less
YDR076W	RAD55	TFIID	TATA-less
YDR077W	SED1	CR	TATA-containing						-0.719074	-0.352222	-0.745635		-0.00788592	0.694688	0.455931
YDR078C	SHU2	TFIID	TATA-less	0.124625	0.178078	-1.04137	-1.09763	-1.02961			-0.283872	-0.38161		1.01555	-0.548684
YDR079C-A	TFB5	TFIID		0.179534	0.555351	-1.86526	-1.00181					-0.370336
YDR079W	PET100	TFIID		0.124625	0.178078	-1.04137	-1.09763	-1.02961			-0.283872	-0.38161		1.01555	-0.548684
YDR080W	VPS41	TFIID	TATA-less	0.179534	0.555351	-1.86526	-1.00181					-0.370336
YDR081C	PDC2	TFIID	TATA-less	0.0590736	0.499589	-1.02576		-0.932156
YDR082W	STN1	TFIID	TATA-less	0.0590736	0.499589	-1.02576		-0.938675
YDR083W	RRP8	TFIID	TATA-less
YDR084C	TVP23	TFIID	TATA-less	0.0138776	0.38681	-1.7998	-1.01004	-1.28479				-0.144286
YDR085C	AFR1	TFIID
YDR086C	SSS1	TFIID	TATA-less				-0.496144	-0.669442			-0.320121	-0.18758		0.660408	-0.816588
YDR087C	RRP1	TFIID	TATA-less
YDR088C	SLU7	TFIID	TATA-less	-0.294894	-0.0912284	-1.03204	-0.889156				-0.477046	-0.429151		0.466526	-0.552102
YDR089W	YDR089W	CR	TATA-less	-0.0774477	-0.195073	-1.08553	-1.218	-1.29797	-1.57736	-1.23979	-1.29379	-0.45187	-0.380115	-0.62323	-0.238472
YDR090C	YDR090C	TFIID	TATA-containing	-0.015167	-0.0456995	-0.66653	-0.874727	-0.907044			-0.487051	-0.307931		0.556986	-0.745577
YDR091C	RLI1	TFIID	TATA-less					-0.437582
YDR092W	UBC13	TFIID		-0.119819	-0.552832	-0.651711	-0.681523				-0.542335	-0.463274		-0.254216	-0.645012
YDR093W	DNF2	TFIID	TATA-less	-0.149575		-0.640076		-1.06223	-0.773705	-0.926407	-0.708323		-0.566463	-0.196723	-0.43052
YDR096W	GIS1	TFIID		0.0112066	-0.566579	-1.43171	-1.04655	-1.34672		-1.52428	-0.648085	-0.496667		0.550258	0.213065
YDR097C	MSH6	TFIID	TATA-less
YDR098C	GRX3	TFIID	TATA-less		-0.150846						-0.406026			0.471813	0.101087
YDR098C-A									-0.620126	-0.500439	-0.489494		-0.250828	-0.206377	0.714582
YDR098C-B									-0.620126	-0.500439	-0.489494		-0.250828	-0.206377	0.714582
YDR099W	BMH2	TFIID		0.0631462	-0.289287	-0.635998	-0.323835	-1.05997		-1.18727	-0.612634	-0.0357512		0.238187	-0.456215
YDR100W	TVP15	TFIID	TATA-less	-0.0718314	-0.624864	-1.33948	-1.12043	-1.16287		-1.00987	-0.284109	-0.320415		0.369147	-0.195633
YDR101C	ARX1	TFIID	TATA-less					-0.619304			-0.270288			0.348718	-0.294898
YDR103W	STE5	TFIID	TATA-less		0.262222			-0.616601			-0.291731			0.390865	-0.266671
YDR104C	SPO71	TFIID	TATA-less
YDR105C	TMS1	TFIID		0.227939	0.375725	-1.48813	-1.29388	-1.15173				-0.508506
YDR106W				0.227939	0.375725		-1.29388	-1.14756				-0.508506
YDR107C	TMN2	TFIID		-0.0843434	0.482849	-1.50224
YDR108W	TRS85	TFIID		-0.0843434	0.482718	-1.50224
YDR109C	YDR109C	TFIID		-0.0743462		-1.11456		-0.931003
YDR110W	FOB1	TFIID	TATA-less	-0.0753993		-1.11506
YDR111C	ALT2	TFIID	TATA-less		-0.199967		-1.10364	-1.34915	-0.819772	-1.40346	-1.25102	-0.354284	-0.0255086	-0.0218331	-0.55076
YDR113C	PDS1	TFIID	TATA-less				-1.17022	-1.2613			-0.158505	-0.561815		0.494719	-0.667719
YDR114C				0.0758949	0.207299		-0.657858					-0.382784
YDR115W	YDR115W	TFIID	TATA-less	0.0489921	0.207299	-1.1374	-0.691085	-1.02609			0.0655152	-0.377159		0.203116	-0.354422
YDR116C	MRPL1	TFIID	TATA-less	0.113566	0.269914	-1.23891	-0.54913	-1.11372				-0.355422
YDR117C	TMA64	TFIID	TATA-less	0.0964945	0.479374	-1.43045	-0.680807	-0.701414				-0.292531
YDR118W	APC4	TFIID	TATA-less	0.0964945	0.479374	-1.43045	-0.699796	-0.698451				-0.285895
YDR119W	VBA4	TFIID	TATA-less	-0.120116	-0.0702924	-1.85835
YDR119W-A				-0.182777	-0.210594		-0.684912	0.383595		0.685234		-0.377494
YDR120C	TRM1	TFIID	TATA-less		0.206488
YDR121W	DPB4	TFIID	TATA-less		0.15564
YDR122W	KIN1	TFIID		-0.00635919	0.216752	-1.167	-0.272768	-0.597284			0.219977	-0.198586		0.314524	-0.642974
YDR123C	INO2	TFIID	TATA-less	-0.130326		-1.31382		-0.823198	-0.624122	-0.67571	-0.512011		0.130349	-0.516507	-0.0420994
YDR124W				-0.144853	-0.36345		-1.00877	-0.823198	-0.598465	-0.65941	-0.512011	-0.416522	0.188911	-0.516507	-0.0420994
YDR125C	ECM18	TFIID
YDR126W				0.000930178	-0.11207		-0.677494					-0.706986
YDR127W	ARO1	CR	TATA-less	0.039786	-0.0431704	-0.813438	-0.477274	-0.786516	-0.403296	-0.648053	0.106877	-0.39501	-0.161144	-0.0198836	0.0223269
YDR128W	MTC5	TFIID	TATA-less	-0.138042	0.122072	-2.0165
YDR129C	SAC6	TFIID	TATA-less	0.145495	-0.369643	-0.743018	-0.200183	-0.668542	-0.76156	-1.09442	-0.133395	-0.110587	-0.139486	0.571821	0.26498
YDR130C	FIN1	TFIID	TATA-less	-0.0118323	-0.0565725	-0.988618	-0.737867					-0.375876
YDR131C	YDR131C	TFIID	TATA-less	-0.0546752	0.545356	-1.46403
YDR132C	YDR132C	CR	TATA-less	-0.0427839	-0.192638	-0.974023	-1.29766		-1.38676		-0.862508	-0.323484	-0.341279	0.894595	0.121813
YDR134C							-0.359355	-0.975764	-1.02923	-1.42285	-0.63575	-0.182434	-0.115078	0.0423737	0.465564
YDR135C	YCF1	CR	TATA-containing	0.079473	-0.270845	-1.0324	-1.16847	-1.09301		-1.22852	-0.522563	-0.240729		0.463194	-0.407612
YDR137W	RGP1	TFIID	TATA-less	0.00240377	0.126316	-1.34059				-1.22526	-0.203924			0.464163	-0.77731
YDR138W	HPR1	TFIID	TATA-less	-0.0806883	0.215805	-0.466795	-0.629825	-0.807156		-0.559964	-0.260728	-0.139169		0.539576	-0.381577
YDR139C	RUB1	TFIID		-0.014985	0.374344	-1.31444	-0.652469					-0.413928
YDR140W	MTQ2	TFIID	TATA-containing	-0.014985	0.374344	-1.31444	-0.652218					-0.415196
YDR141C	DOP1	TFIID	TATA-less	0.204615	0.503927	-0.935402	-0.453192					-0.324284
YDR142C	PEX7	TFIID	TATA-less	-0.0658265	0.196823	-2.1473	-0.753963					-0.24865
YDR143C	SAN1	TFIID	TATA-less	0.00434531	0.143583	-0.952348	-0.680077	-1.10187				-0.353758
YDR144C	MKC7	TFIID	TATA-less	-0.0388931		-0.804215	-0.680162	-0.937911				-0.236802
YDR145W	TAF12	TFIID	TATA-less	-0.0388931	0.755038	-0.804215		-0.852278			0.150163			-0.1348	-0.136154
YDR146C	SWI5	TFIID	TATA-less
YDR147W	EKI1	TFIID	TATA-less
YDR148C	KGD2	TFIID	TATA-less	0.121682	-0.0719983	-1.00255	-0.775065	-1.02527		-0.597042	-0.352065	-0.256878		0.053048	-0.242191
YDR150W	NUM1	TFIID		0.141436		-0.974339	-0.782503	-1.12061		-0.590718	-0.352065	-0.258724		0.053048	-0.242191
YDR151C	CTH1	TFIID	TATA-less	0.332594	-0.24988	-1.06294	-0.515047	-0.780588	-0.713286	-1.34217	-0.504808	-0.265164	-0.319599	-0.533407	-0.673115
YDR152W	GIR2	TFIID	TATA-less					-0.776079	-0.712408	-1.34217			-0.266697
YDR153C	ENT5	TFIID	TATA-less	-0.143083	-0.867366	-0.695108	-0.587381	-1.28218	-1.358	-1.50771	-0.829346	-0.194775	-0.0983168	-0.13656	-0.132217
YDR155C	CPR1	CR	TATA-containing				-0.592256	-0.703977	-0.593153	-0.982391	-0.281255	-0.255117	-0.114994	0.0900559	-0.0192424
YDR156W	RPA14	TFIID	TATA-less					-0.739114	-0.677843	-0.683638	-0.347364		-0.195334	-0.322511	0.165594
YDR158W	HOM2	CR	TATA-less				-0.762953	-0.96517	-0.46831	-0.426894	-0.407335	-0.196304	-0.292891	-0.055145	0.134922
YDR159W	SAC3	TFIID	TATA-less	0.0654415	0.0208387	-0.772098					0.187841			0.275904	-0.636943
YDR160W	SSY1	TFIID	TATA-less	0.0199615	0.59584	-1.64237
YDR161W	YDR161W	TFIID	TATA-less
YDR162C	NBP2	TFIID	TATA-less	-0.0885225	0.770517	-1.74503
YDR163W	CWC15	TFIID	TATA-less	-0.0885225	0.770517	-1.74503
YDR164C	SEC1	TFIID	TATA-less	0.108783	0.511574	-1.36386	-0.774767	-0.593373				-0.413753
YDR165W	TRM82	TFIID	TATA-less
YDR166C	SEC5	TFIID		0.145605	0.515509	-1.52838	-0.150931					-0.0926292
YDR167W	TAF10	TFIID	TATA-less	0.145605	0.515509	-1.52838	-0.148631					-0.091152
YDR168W	CDC37	TFIID	TATA-less	0.317847	0.396976	-1.98683	-0.200829	-0.830242				-0.0997269
YDR169C	STB3	TFIID	TATA-less	0.108015	-0.165254	-0.553058	-0.803465	-1.0646		-0.626509	0.349075	-0.122312		0.301556	-0.194265
YDR169C-A
YDR170C	SEC7	TFIID	TATA-less	0.118934	0.0914606	-0.911624	-0.600338	-0.798187			-0.195193	-0.279883		-0.179718	-0.502822
YDR170W-A									-0.451852	-0.169821	-0.600807		-0.0921761	-9.45e-05	0.00331024
YDR171W	HSP42	CR	TATA-containing				-0.368914	-1.02908	-0.565744	-0.680201	-0.416281	-0.532397	-0.338935	-0.371438	-0.390696
YDR172W	SUP35	TFIID	TATA-less	-0.181425	0.24843	-0.657949	-0.0977334	-0.781796			-0.0216787	-0.314997		0.311651	-0.625171
YDR173C	ARG82	CR	TATA-less	0.0304525	-0.424036	-0.734607	-0.360899	-0.989156	-0.986106	-0.619706	-0.325964	-0.228524	-0.216012	-0.279061	-0.0661097
YDR174W	HMO1	TFIID	TATA-less	-0.0125726	-0.706134	-0.826102	-0.0920833	-0.981191	-1.10696	-0.816251	-0.570832	-0.169909	-0.25796	-0.385928	-0.153525
YDR175C	RSM24	TFIID	TATA-less	0.0633219	-0.146229	-0.778304	-0.605705	-0.901786			0.741684	-0.282063		0.813244	-0.342256
YDR176W	NGG1	TFIID	TATA-less	0.0633219	-0.146229	-0.778304	-0.605705	-0.901786			0.741684	-0.282063		0.813244	-0.342256
YDR177W	UBC1	TFIID	TATA-less	-0.0443572	-0.169045	-1.01781	-0.644596	-0.727072			-0.0334517	-0.26985		0.0413616	-0.726976
YDR178W	SDH4	TFIID	TATA-containing	0.0154947	-0.578805	-1.49547	-0.999104	-1.21011		-0.919428	-0.246847	-0.500606		-0.366542	-0.722343
YDR179C	CSN9	TFIID
YDR179W-A	YDR179W-A	TFIID
YDR180W	SCC2	TFIID	TATA-less	-0.0866102		-0.864225
YDR181C	SAS4	TFIID		-0.022828	0.680792	-1.35214	-0.407805	-0.847224				-0.257459
YDR182W	CDC1	TFIID		-0.022828	0.680792	-1.35214	-0.407805	-0.867584				-0.257459
YDR182W-A
YDR183W	PLP1	TFIID		0.163976	0.743828	-1.99536	-0.225628					-0.79782
YDR184C	ATC1	TFIID	TATA-less
YDR185C											-0.421918			0.453913	-0.922705
YDR186C	YDR186C	TFIID	TATA-less	-0.00802856		-0.618419	-0.796363	-1.11646	-0.903872	-0.762419	-0.586093	-0.327889	-0.246774	-0.254364	-0.0645073
YDR188W	CCT6	TFIID	TATA-less	-0.0254578	-0.143653	-0.804679	-0.612363		-0.948393	-0.541971	-0.127172	-0.174681	-0.159805	-0.264763	0.149239
YDR189W	SLY1	TFIID	TATA-less	0.0351286	0.431502	-0.981894
YDR190C	RVB1	TFIID	TATA-less	-0.121611	0.117888	-0.406495	-0.0555659	-0.614904				-0.445866
YDR191W	HST4	TFIID	TATA-less	-0.121611	0.117888	-0.406495	-0.0779779	-0.603586				-0.447218
YDR192C	NUP42	TFIID	TATA-less	-0.056829		-0.565735
YDR194C	MSS116	TFIID	TATA-containing	-0.0640926	-0.238249	-0.904496	-0.889538	-1.0378				-0.453864
YDR194W-A				-0.0347684	-0.0508406		-1.14816	-0.87259				-0.349361
YDR195W	REF2	CR	TATA-containing		-0.593754		-0.56053	-1.00851				-0.368878
YDR196C	CAB5	TFIID	TATA-less	0.0189969	0.143508	-1.52706	-0.679363	-1.31236			-0.312872	-0.346385		0.954201	-0.961688
YDR197W	CBS2	TFIID	TATA-less	0.0189969	0.143508	-1.52706	-0.679363	-1.31819			-0.305911	-0.346385		0.944077	-0.957484
YDR198C	RKM2	TFIID	TATA-less
YDR200C	VPS64	TFIID	TATA-less	0.120632	0.5092	-1.56022	-1.1771	-0.941396				-0.504344
YDR201W	SPC19	TFIID		0.120632	0.5092	-1.56022	-1.1771	-0.936173				-0.504344
YDR202C	RAV2	TFIID		0.149872	-0.192532	-2.16964	-1.20126	-1.31413				-0.443485
YDR204W	COQ4	TFIID		0.149872	-0.192532	-2.16964	-1.20126	-1.31413				-0.443485
YDR205W	MSC2	TFIID	TATA-less	0.205297	0.307119	-0.87546	-0.698223	-1.21292		-0.621924	0.105801	-0.231387		0.751024	-0.702116
YDR206W	EBS1	TFIID	TATA-less	-0.0115995	0.131848	-0.766267	-0.775195					-0.39821
YDR207C	UME6	TFIID	TATA-less	0.0369316		-1.01793	-0.873274	-0.982916	-0.431583	-0.37013	0.13382	-0.428834	-0.341554	0.137958	0.0926838
YDR208W	MSS4	TFIID	TATA-less	0.068064	0.268269	-0.977217	-0.391463	-1.10753	-0.654943	-0.275145	0.089818	-0.131544	-0.220479	0.262984	-0.0229865
YDR210C-C									-0.59025	-0.409688	-0.435069		-0.241667	-0.363186	0.828461
YDR210C-D									-0.59025	-0.409688	-0.435069		-0.241667	-0.363186	0.828461
YDR210W	YDR210W	CR	TATA-containing	0.0354336	0.156122	-0.972347		-1.03391		-0.279379	-0.230152			0.107157	-0.0597665
YDR210W-A				0.0884385					-0.277126	-0.0860887	-0.14392		-0.359736	0.153405	0.561491
YDR210W-B				0.0884385					-0.277126	-0.0860887	-0.14392		-0.359736	0.153405	0.561491
YDR211W	GCD6	TFIID	TATA-containing				-0.264043			-0.0967304	-0.43291	-0.339448		0.0748	0.327437
YDR212W	TCP1	TFIID	TATA-less	0.0717054	0.604254	-1.12034
YDR213W	UPC2	TFIID							-0.993778	-0.843024	-0.622533		-0.110957	0.125112	-0.190412
YDR214W	AHA1	CR	TATA-less				-0.825056	-0.972407	-1.29994	-1.39405	-0.527612	-0.13568	-0.32577	-0.831847	-0.578387
YDR216W	ADR1	TFIID					-0.959642	-1.31574	-1.9555	-1.96289	-1.16858	-0.255732	-0.479537	-0.244054	-0.354247
YDR217C	RAD9	TFIID
YDR218C
YDR219C	MFB1	TFIID	TATA-less	-0.0352623	-0.0807769	-1.37759	-0.677887				-0.498735	-0.142108		0.393633	-0.910932
YDR221W	GTB1	TFIID	TATA-less	-0.0352623	-0.0807769	-1.37759	-0.67154				-0.498735	-0.144927		0.393633	-0.910932
YDR222W	YDR222W	CR	TATA-containing				-0.597598		-0.611372	-0.564581		-0.433411	-0.11306
YDR223W											-1.09307			0.24273	-0.206524
YDR224C	HTB1	CR	TATA-containing	0.205213	-0.117136	-0.320238	-0.804459	-1.03219	-1.09788	-1.44419	-0.645777	-0.26494	-0.299203	0.0981001	-0.151335
YDR225W	HTA1	CR	TATA-containing							-1.42134	-0.791894			0.226734	0.0562132
YDR226W	ADK1	CR	TATA-containing	-0.216999		-0.651343	-1.28044	-1.24595	-1.38042		-0.737222	-0.484226	-0.0638043	0.00516147	-0.281514
YDR227W	SIR4	TFIID	TATA-less	-0.129652	0.411458	-0.755493
YDR228C	PCF11	TFIID	TATA-less	0.140546	0.206318	-0.936519	-0.759774	-1.15381		-0.929108	-0.329666	-0.258884		0.455919	-0.618894
YDR229W	IVY1	TFIID		0.147984	0.00812293	-0.872	-0.935779	-1.14074			0.276006	-0.161462		0.75626	-0.68448
YDR231C	COX20	TFIID	TATA-less	0.00673709	-0.320206	-0.834125	-0.786275	-0.953846	-1.01973	-0.601304	-0.260278	-0.522357	-0.253881	0.0199029	-0.144441
YDR232W	HEM1	TFIID	TATA-less	0.00673709	-0.320206	-0.834125	-0.707609	-1.0223	-1.00909	-0.745947	-0.260278	-0.498893	-0.236935	0.0199029	-0.144441
YDR233C	RTN1	TFIID	TATA-containing	-0.0960835	-0.450923	-0.594072	-0.807559	-1.25254	-1.25929	-1.10101	-0.815682	-0.280562	-0.618892	-0.797168	-0.567657
YDR234W	LYS4	TFIID	TATA-containing	-0.0663429	-0.172488	-0.553484	-0.681113		-1.32779	-1.0865		-0.562962	-0.507216
YDR235W	PRP42	TFIID	TATA-less	0.0470537	-0.0142807	-1.02249	-0.544101					-0.45685
YDR236C	FMN1	TFIID	TATA-less	0.113663	0.386972	-1.09384	-1.19305					-0.402639
YDR237W	MRPL7	TFIID	TATA-less					-1.06612
YDR238C	SEC26	TFIID	TATA-less	-0.0127291	0.483629	-0.78912	0.0303545	-1.09377			0.232283	-0.312099		0.951281	-0.16184
YDR239C	YDR239C	TFIID	TATA-less
YDR240C	SNU56	TFIID		-0.040317	0.34693	-0.902441	-0.626598					-0.244916
YDR242W	AMD2	TFIID		-0.13158	-0.0966056	-0.905737	-0.822385	-0.688149			-0.0107996	-0.320513		0.268329	-0.423461
YDR243C	PRP28	TFIID		-0.0734022	0.0219644	-0.686053	-0.85303				-0.15601	-0.264458		0.4171	-0.442192
YDR244W	PEX5	TFIID	TATA-containing	-0.0734022	0.0219644	-0.686053	-0.85599				-0.15601	-0.254775		0.4171	-0.442192
YDR245W	MNN10	TFIID	TATA-less	0.0755591	0.0126466	-0.494424	-0.819031	-1.06065			-0.166117	-0.450926		0.399395	-0.509441
YDR246W	TRS23	TFIID	TATA-less	0.0270597	-0.360761	-1.05607	-0.850722	-1.00439			-0.36073	-0.336062		0.748867	-0.42462
YDR246W-A								-0.993463		-1.03989	-0.791612			-0.320991	-0.119381
YDR247W	VHS1	CR	TATA-less				-0.683875	-1.09904	-0.674929	-0.892547	-0.430879	-0.254186	-0.247382	-0.10944	0.0783995
YDR248C	YDR248C	TFIID	TATA-containing	-0.275424		-2.00324
YDR249C	YDR249C	TFIID	TATA-less	-0.00644561	-0.409586	-0.80187	-0.915351	-1.37095	-0.92509	-0.921451	-0.292467	-0.25536	-0.167116	-0.0687408	-0.0873409
YDR251W	PAM1	TFIID	TATA-less	-0.00644561	-0.409586	-0.80187	-0.915509	-1.37095	-0.92509	-0.921451	-0.292467	-0.25536	-0.167116	-0.0687408	-0.0873409
YDR252W	BTT1	TFIID	TATA-less		0.0879438
YDR253C	MET32	TFIID	TATA-less
YDR254W	CHL4	TFIID	TATA-less	-0.0330839	0.0742179	-0.673473	-1.01459	-1.07197		-1.04002	-0.627866	-0.378957		-0.3681	-0.0945685
YDR255C	RMD5	TFIID	TATA-less	0.0278613	0.446112	-1.02281	-0.659071	-1.07383			0.219305	-0.130626		0.847039	-0.637866
YDR256C
YDR257C	RKM4	TFIID	TATA-less		0.249587		-0.461559				-0.696904	-0.445509		-0.15873	-0.70669
YDR258C	HSP78	TFIID	TATA-containing						-1.17792	-1.123	-0.971024		-0.39943	-0.398625	-0.574935
YDR259C											-0.381433			-0.12854	0.514339
YDR260C	SWM1	TFIID	TATA-less	-0.161371	-0.690947	-0.787738	-1.02768	-1.21733		-0.832313	-0.833989	-0.327246		0.567158	0.196676
YDR261C	EXG2	TFIID	TATA-containing	-0.098533	-0.219904	-1.20388					-0.510288			0.513172	-0.359093
YDR261C-C									-0.578975	-0.41045	-0.532092		-0.280219	-0.41713	0.642371
YDR261C-D									-0.578975	-0.41045	-0.532092		-0.280219	-0.41713	0.642371
YDR261W-A									-0.322097	0.170488	0.0380281		-0.373575	-0.00182858	0.489874
YDR261W-B									-0.322097	0.170488	0.0380281		-0.373575	-0.00182858	0.489874
YDR262W	YDR262W	TFIID	TATA-containing	-0.0173465	-0.216313	-0.584661	-0.483016	-1.04188	-1.07669	-0.788861	-0.0969326	-0.0846994	-0.197846	-0.245188	0.29343
YDR263C
YDR264C	AKR1	TFIID	TATA-less	-0.0560424	-0.0733005	-1.16502	-1.01944	-1.32902			-0.598688	-0.321025		-0.0525059	-0.305443
YDR265W	PEX10	TFIID	TATA-less	-0.0560424	-0.112883	-1.16502	-1.01944	-1.32902			-0.598688	-0.321025		-0.0525059	-0.305443
YDR266C	HEL2	TFIID	TATA-less	0.00576938	0.25762	-1.17357
YDR267C	CIA1	TFIID	TATA-less	-0.139668	0.0963778	-1.12745	-0.925886	-0.839058				-0.545333
YDR268W	MSW1	TFIID	TATA-less	-0.139668	0.0921193	-1.12745	-0.925886	-0.921337				-0.545333
YDR270W	CCC2	CR	TATA-less	-0.130007	-0.340377	-1.35067	-0.931386	-1.05127			-0.581672	-0.29684		0.29613	-0.055239
YDR272W	GLO2	TFIID	TATA-less	0.044409	-0.238174	-1.57306		-1.06754			-0.397254			0.416528	-0.757667
YDR273W
YDR275W	BSC2	CR					-0.739455	-0.896053		-1.00394	-1.13996	-0.115445		0.322579	0.0441185
YDR276C	PMP3	CR	TATA-containing				-0.551795	-0.823919	-1.06579	-0.949539	-0.304172	-0.202866	-0.257966	0.210125	0.271829
YDR277C	MTH1	TFIID	TATA-less						-1.54275	-1.58879	-0.793805		-0.338817	0.262712	0.0601057
YDR279W	RNH202	TFIID		-0.185128	-0.189393	-1.5181
YDR280W	RRP45	TFIID	TATA-less	-0.0540003	0.190418	-0.600146	-0.607303	-1.22165				-0.372973
YDR281C										-1.6208	-1.02927			-0.0217197	-1.15492
YDR282C	YDR282C	TFIID	TATA-containing	-0.138649		-2.40448
YDR283C	GCN2	TFIID		0.0819029	0.230586	-1.15287	-1.09137	-1.08956			-0.237543	-0.371714		-0.0634065	-0.597034
YDR284C	DPP1	TFIID	TATA-less	0.0715213	-0.0593981	-1.01624	-1.08938	-1.12269			-0.997415	-0.548992		-0.120666	-0.548567
YDR285W	ZIP1	TFIID		0.0715213	-0.0593981	-1.01624	-1.0841	-1.12269			-0.997415	-0.548295		-0.120666	-0.548567
YDR286C	YDR286C	TFIID		0.107038	0.432006	-1.97167	-1.38822	-1.00942			-0.789993	-0.614639		0.728195	-1.15441
YDR287W	INM2	TFIID		0.107038	0.432006	-1.97167	-1.38822	-1.00244			-0.789993	-0.614639		0.728195	-1.15441
YDR288W	NSE3	TFIID	TATA-less	-0.01164	0.330177	-1.78993	-0.940726	-0.871478			-0.149724	-0.419154		1.2087	-0.701698
YDR289C	RTT103	TFIID		0.0533786	0.399356	-1.03257	-0.964555					-0.39894
YDR291W	HRQ1	TFIID		0.0533786	0.399356	-1.03257	-0.964555					-0.39894
YDR292C	SRP101	TFIID	TATA-less		0.307017
YDR293C	SSD1	TFIID	TATA-less	-0.112664	-0.596835	-0.769751		-0.917436	-0.163033	-0.0112823	-0.0662751		-0.326197	0.77655	0.032323
YDR294C	DPL1	TFIID	TATA-containing	0.127237		-0.934272
YDR295C	HDA2	TFIID	TATA-less	0.0860192	0.0587201	-0.338666	-0.664193	-1.2131			-0.116195	-0.290089		0.536774	-0.360369
YDR296W	MHR1	TFIID	TATA-less	0.0860192	0.0587201	-0.338666	-0.59058	-1.09661			-0.116195	-0.379639		0.536774	-0.360369
YDR297W	SUR2	TFIID	TATA-containing				-0.900791		-0.975657	-0.644305	-0.564932	-0.284858	-0.400772	-0.0777674	-0.21549
YDR298C	ATP5	TFIID	TATA-less	-0.207127	0.0760163	-1.1704
YDR299W	BFR2	TFIID	TATA-containing
YDR300C	PRO1	TFIID	TATA-less					-0.863309			-0.13036			0.330755	-0.301539
YDR301W	CFT1	TFIID	TATA-less	0.0474749	0.13501	-0.546602	-0.379787	-0.909279			0.0352402	-0.324276		0.287911	-0.377484
YDR302W	GPI11	TFIID
YDR303C	RSC3	TFIID	TATA-less	-0.0968549	-0.104708	-1.36101	-0.869201	-0.930524				-0.44589
YDR304C	CPR5	TFIID		0.0319979	-0.234903	-2.25402	-0.772548	-0.768009			-0.391868	-0.369246		0.882952	-0.80316
YDR305C	HNT2	TFIID	TATA-less	-0.0292815	0.245179	-1.32426	-0.571745					-0.344213
YDR306C	YDR306C	TFIID		-0.0799782	-0.206536	-1.3771	-0.771134	-1.0749		-0.54905	-0.434551	-0.515667		0.598132	-0.0692917
YDR307W	PMT7	TFIID	TATA-less	0.0670073	0.408685	-1.54324	-1.00609			-0.539513		-0.727294
YDR308C	SRB7	TFIID	TATA-less	-0.0137283	0.656497	-1.50395
YDR309C	GIC2	CR	TATA-containing						-0.537675	-0.298362	-0.359616		-0.134592	-0.255998	0.426441
YDR310C	SUM1	TFIID	TATA-less	-0.250483	0.172195	-0.719715	-0.520223	-0.948964			-1.02723	-0.284904		0.0214253	-0.206141
YDR311W	TFB1	TFIID	TATA-less	-0.103481	0.259733	-0.557668	-0.497852	-0.924316				-0.0589247
YDR312W	SSF2	TFIID	TATA-less
YDR313C	PIB1	TFIID	TATA-less	0.0108628	0.437845	-0.311174	-0.473914	-0.915989			0.087033	-0.454217		0.289318	-0.046948
YDR314C	RAD34	TFIID	TATA-less	-0.0161705	0.401768	-1.48668	-0.503866					-0.508572
YDR315C	IPK1	TFIID		-0.0264104	0.173952	-1.56066
YDR316W	OMS1	TFIID	TATA-less	-0.0264104	0.173952	-1.56066
YDR316W-A							-0.737804		-0.559754	0.187667	-0.355637	-0.554536	-0.234051	-0.170079	0.552264
YDR316W-B							-0.737804		-0.559754	0.187667	-0.355637	-0.554536	-0.234051	-0.170079	0.552264
YDR317W
YDR318W	MCM21	TFIID		0.0992108	0.482656	-1.33958	-1.0521	-1.09487				-0.462058
YDR319C	YFT2	TFIID	TATA-less	0.170167	0.0832425	-1.40308	-0.887015	-0.866829			0.48542	-0.211468		0.297299	0.173719
YDR320C	SWA2	TFIID	TATA-less				-0.977985					-0.511644
YDR320C-A	DAD4	TFIID		0.109929	0.365224	-1.60294	-1.00571	-0.50736				-0.529551
YDR321W	ASP1	TFIID	TATA-less	0.109929	0.365224	-1.60294	-1.00571	-0.506993				-0.529551
YDR322C-A	TIM11	TFIID	TATA-containing	0.0313104	0.107057	-1.09544	-0.7281	-0.969982			-0.415024	-0.234762		1.16151	-0.703665
YDR322W	MRPL35	TFIID	TATA-less	-0.00442763	0.711275	-1.41872
YDR323C	PEP7	TFIID	TATA-less	-0.090781	0.286105	-1.36609
YDR324C	UTP4	TFIID	TATA-less
YDR325W	YCG1	TFIID	TATA-less
YDR326C	YSP2	TFIID	TATA-containing	0.0810993	0.662086	-0.660974	-0.398663	-0.540802			0.0720472	-0.224235		0.743023	-0.444001
YDR328C	SKP1	TFIID	TATA-less	0.0505039	0.155792	-0.968369	-0.734863	-0.892691			-0.244164	-0.276609		0.773704	-0.509762
YDR329C	PEX3	TFIID	TATA-less	-0.0883859	0.0691618	-1.17753	-0.619106	-1.58691			0.076077	-0.214878		0.702957	-0.458636
YDR330W	UBX5	TFIID	TATA-less	-0.0883859	0.0691618	-1.17753	-0.619106	-1.58691			0.076077	-0.214878		0.702957	-0.458636
YDR331W	GPI8	TFIID	TATA-less	0.0440214	0.428907	-0.955816	-0.392069					-0.176434
YDR332W	IRC3	TFIID	TATA-less	-0.00519758		-2.50106
YDR333C	RQC1	TFIID	TATA-less		0.28853			-0.716203			0.371892			0.331086	-0.118756
YDR334W	SWR1	TFIID	TATA-less	0.263098	-0.0760162	-0.621029	-0.110305	-0.716203			0.371892	-0.130567		0.331086	-0.118756
YDR335W	MSN5	TFIID	TATA-less	0.0863699	0.14852	-1.38885	-0.767953	-0.881759			0.0402377	-0.271023		0.267542	0.266052
YDR336W	YDR336W	TFIID		0.0442494	0.118698	-2.15663
YDR337W	MRPS28	TFIID	TATA-less	0.130917	0.519796	-1.26318	-0.519575	-0.809332				-0.213496
YDR338C	YDR338C	TFIID		0.200378	0.321646	-1.61978	-0.829273	-0.794485				-0.279466
YDR339C	FCF1	TFIID	TATA-less	-0.154219	0.206753	-0.542087		-0.350248			0.0537957			0.640774	-0.0730892
YDR341C	YDR341C	TFIID	TATA-less	-0.125665		-0.649233
YDR342C							-0.865448	-1.14651	-1.76663	-0.973505	-0.620623	-0.308401	-0.20187	0.518733	0.0699878
YDR343C									-2.07546	-2.07286	-1.02002		-0.291726	0.755767	0.239987
YDR345C	HXT3	CR	TATA-containing						-0.162282	0.114892			0.165036
YDR346C	SVF1	TFIID		0.0975998	0.0712841	-0.619445	-0.633977	-1.05155	-1.13481	-0.601493	-0.000979823	-0.312223	-0.356125	0.441205	-0.436615
YDR347W	MRP1	TFIID	TATA-less	0.0975998	0.0712841	-0.619445	-0.633977	-1.05155	-1.12829	-0.604991	-0.000979823	-0.312223	-0.356039	0.441205	-0.436615
YDR348C	PAL1	TFIID	TATA-less	-0.210495	0.303966	-0.803394	-0.418355				0.0742221	-0.324331		0.633086	-0.474179
YDR349C	YPS7	TFIID	TATA-less	-0.0639442	0.143819	-1.04442		-0.597809			-0.265847			-0.0550191	-0.613294
YDR350C	ATP22	TFIID	TATA-less	-0.0466473	-0.0414753	-0.436178	-0.336683	-0.967831			0.134287	-0.217281		0.781345	-0.5052
YDR351W	SBE2	TFIID	TATA-less	-0.0466473	-0.0414753	-0.436178	-0.336683	-0.967858			0.134287	-0.217281		0.781345	-0.5052
YDR352W	YPQ2	TFIID		-0.0341135	0.169285	-0.930373	-0.641527				0.141093	-0.2975		0.969914	-0.509294
YDR353W	TRR1	CR	TATA-less	-0.0273688	-0.180587	-0.845836	-0.911751	-1.14112	-0.963634	-0.812409	-0.284482	-0.226517	-0.257995	0.661068	0.260441
YDR354W	TRP4	TFIID	TATA-less	-0.146508	-0.119077	-1.18543	-1.14136	-1.08077	-0.785474	-1.02237	-0.648479	-0.486581	-0.347011	0.616345	0.112484
YDR356W	SPC110	TFIID
YDR357C	CNL1	TFIID	TATA-less							-0.65025	-0.996029			-0.154559	-0.753619
YDR358W	GGA1	TFIID	TATA-containing	0.039552	0.134748	-1.26829	-0.702795			-0.65443	-1.0031	-0.138666		-0.154053	-0.75485
YDR359C	EAF1	TFIID	TATA-less
YDR361C	BCP1	TFIID	TATA-less	-0.066505	0.0180504	-0.48092	-0.545473	-0.601737				-0.305132
YDR362C	TFC6	TFIID	TATA-less	0.113216	0.116074	-0.941935	-0.996316	-1.15224			-0.281403	-0.452159		0.702123	-0.489601
YDR363W	ESC2	TFIID	TATA-less	0.113216	0.116074	-0.941935	-0.996316	-1.15224			-0.281403	-0.452159		0.702123	-0.489601
YDR363W-A	SEM1	TFIID	TATA-less	0.126174	-0.141878	-1.39739	-0.277375	-0.314004	-0.258945	0.872565	1.48427	-0.135678	-0.419248	1.22788	0.419881
YDR364C	CDC40	TFIID	TATA-less	-0.0895295		-1.07668
YDR365C	ESF1	TFIID	TATA-less	-0.125554	0.288256	-0.715372				-0.303507
YDR365W-A				-0.189949	-0.147611				-0.557854	-0.287478	-0.312761		-0.278539	0.130283	0.730965
YDR365W-B				-0.189949	-0.147611				-0.557854	-0.287478	-0.312761		-0.278539	0.130283	0.730965
YDR366C				-0.100197	0.55872
YDR367W	KEI1	TFIID	TATA-less	-0.0925968	0.55707	-1.77566			-0.43912	-0.269315	-0.404758		-0.25102	0.0645042	0.519152
YDR368W	YPR1	TFIID	TATA-less	-0.114925	-0.134355	-1.14253	-0.93757	-0.975148			-0.611707	-0.202319		0.437093	-0.360219
YDR369C	XRS2	TFIID		-0.0772051		-1.70334
YDR370C	DXO1	TFIID	TATA-less	-0.0243176	-0.185462	-1.66941	-1.20044	-0.853499			-0.554013	-0.495367		0.182757	-0.468153
YDR371W	CTS2	TFIID	TATA-less	-0.0243176	-0.196129	-1.66941	-1.20044	-0.853146			-0.571416	-0.495367		0.179424	-0.464321
YDR372C	VPS74	TFIID	TATA-less	0.0235472	0.245555	-0.856279	-0.249516	-1.21778			0.0508929	-0.228806		-0.494739	-0.347289
YDR373W	FRQ1	TFIID	TATA-less	0.0235472	0.245555	-0.856279	-0.249516	-1.21778			0.0508929	-0.228806		-0.494739	-0.347289
YDR374C
YDR374W-A	WIP1	TFIID	TATA-less		0.211222
YDR375C	BCS1	TFIID	TATA-less	0.0183529	-0.160725	-1.5606	-1.01785	-1.35889			-0.431502	-0.434308		0.2331	-0.906923
YDR376W	ARH1	TFIID		0.0183529	-0.160725	-1.5606	-1.01785	-1.35889			-0.431502	-0.434308		0.2331	-0.906923
YDR377W	ATP17	TFIID	TATA-less	0.151429	-0.390902	-1.0534	-0.627106	-1.09184		-0.686033	-0.217457	-0.258338		0.925816	-0.678662
YDR378C	LSM6	TFIID	TATA-less	0.166773	0.0325177	-0.892835	-1.10186	-1.22793	-0.682895		-0.0121271	-0.272394	-0.295967	0.0524169	-0.420747
YDR379C-A				0.0359475	-0.136225		-0.866894	-1.23063		-0.291993	-0.487405	-0.437483		0.00638724	-0.711156
YDR379W	RGA2	TFIID	TATA-less					-1.07502	-0.683913		-0.0891567		-0.295913	-0.0655023	-0.299864
YDR380W	ARO10	CR								-0.291993	-0.577048			-0.249493	-0.283357
YDR381C-A	YDR381C-A	TFIID	TATA-containing					-1.56562
YDR381W	YRA1	CR	TATA-containing	0.0305225	-0.23726	-0.726532	-0.717216	-1.11437			-0.267796	-0.600121		0.197259	-0.655314
YDR382W	RPP2B	TFIID	TATA-less				-0.274363	-1.29681				-0.514142
YDR383C	NKP1	TFIID		-0.206447		-1.14607
YDR384C	ATO3	TFIID	TATA-less							-0.666611	-1.25904			-0.659498	-0.605631
YDR385W	EFT2	TFIID	TATA-less	-0.134959	-0.732124	-0.508799	-0.541813	-1.27069	-0.870381	-0.664367	-0.748066	-0.466158	-0.294917	-0.171241	-0.168486
YDR386W	MUS81	TFIID	TATA-less
YDR387C	YDR387C	TFIID	TATA-less	0.1189	-0.246366	-1.27091	-0.495145	-0.965774			0.206144	-0.207485		0.263886	-0.190681
YDR388W	RVS167	TFIID	TATA-less	0.1189	-0.246366	-1.27091	-0.495145	-0.967761			0.206144	-0.207485		0.263886	-0.190681
YDR389W	SAC7	TFIID					-0.715963	-0.627085	-0.549202	-0.0788616	-0.312629	-0.0868293	0.000334428	-0.234181	0.631953
YDR390C	UBA2	TFIID	TATA-less
YDR391C	YDR391C	TFIID									-0.607841			-0.235086	-0.383243
YDR392W				0.0389388	0.144608		-0.957859	-1.21096			-0.185822	-0.51636		-0.233447	-0.470468
YDR393W	SHE9	TFIID	TATA-less	-0.0475892	-0.108284	-0.729855		-0.617365			0.603267			-1.42858	0.49396
YDR394W	RPT3	TFIID	TATA-less	0.278083	0.447929	-0.373649	-0.165541	-1.09463			0.372557	-0.0455578		0.119425	-0.640466
YDR395W	SXM1	TFIID	TATA-less
YDR397C	NCB2	CR	TATA-containing	-0.288554	-0.118482	-0.737491		-0.866593			-0.323885			0.0607366	-0.141565
YDR398W	UTP5	TFIID	TATA-less					-0.849041			-0.117446			-0.11683	-0.0109644
YDR399W	HPT1	CR	TATA-less				-0.811567	-0.825736	-1.29166	-0.928914	-0.808855	-0.488906	-0.255657	-0.670302	-1.02106
YDR400W	URH1	TFIID	TATA-less
YDR402C
YDR403W
YDR404C	RPB7	TFIID	TATA-less	-0.0432084	0.118978	-0.720027	-0.501469	-1.10705			0.134033	-0.153538		0.173078	-0.637833
YDR405W	MRP20	TFIID	TATA-less	-0.0432084	0.118978	-0.720027	-0.501469	-1.10705			0.134033	-0.153538		0.173078	-0.637833
YDR406W	PDR15	CR	TATA-containing	-0.202757	-0.560164	-1.00497	-0.896246		-0.474415	-0.499074	-0.450378	-0.465566	-0.121628	0.387463	-0.481338
YDR407C	TRS120	TFIID	TATA-containing	0.0486846	0.180286	-0.672079	-0.337421	-0.842626			-0.259628	-0.389214		0.420189	-0.259627
YDR408C	ADE8	TFIID	TATA-less	0.00855393	-0.0511201	-0.726318	-0.828703	-1.15847		-0.803547	-0.324071	-0.615231		-0.158664	-0.350788
YDR409W	SIZ1	TFIID	TATA-less	0.00855393	-0.0511201	-0.726318	-0.828623	-1.22207		-0.803547	0.0690765	-0.615876		-0.200861	-0.359443
YDR410C	STE14	TFIID	TATA-containing	-0.0371878	0.0858969	-1.0715	-0.954878					-0.353233
YDR411C	DFM1	TFIID	TATA-less	0.0916639	0.0351795	-1.11353	-0.155081	-0.559709			-0.0440102	-0.137071		0.533996	-0.215216
YDR412W	RRP17	TFIID	TATA-less	0.0916639	0.0351795	-1.11353	-0.155715	-0.565264			-0.0391602	-0.140272		0.534654	-0.213269
YDR414C	ERD1	TFIID		0.0540246	0.531745	-1.25744	-0.778282					-0.449245
YDR415C	YDR415C	TFIID	TATA-less	0.207496	0.501851	-1.51858	-0.755163					-0.41664
YDR416W	SYF1	TFIID	TATA-less	0.207496	0.501851	-1.51858	-0.755163					-0.41664
YDR418W	RPL12B	TFIID	TATA-less				-0.488045	-0.746554		-0.583298	0.0263115	-0.394642		0.548529	0.0366601
YDR419W	RAD30	TFIID		-0.0321154	-0.0948753	-1.56091
YDR420W	HKR1	TFIID	TATA-less	0.071088	0.337491	-0.80159	-0.403511	-0.814261			-0.387132	-0.280203		0.60351	-0.124328
YDR421W	ARO80	TFIID		0.0956836	0.506117	-2.89918
YDR422C	SIP1	TFIID	TATA-less	0.0031551	0.200742	-0.831297	-0.819242					-0.242505
YDR423C	CAD1	TFIID	TATA-less	0.185462	-0.136617	-1.10688	-1.01151	-1.30933			0.172418	-0.293341		0.204915	-0.65211
YDR424C	DYN2	TFIID	TATA-less	0.132037		-1.67476
YDR425W	SNX41	TFIID		0.132114		-1.67476
YDR427W	RPN9	TFIID	TATA-less	0.356325	0.618784	-0.830004	0.444113	-0.410968			0.699459	-0.00488232		1.04204	0.0185507
YDR428C
YDR429C	TIF35	TFIID	TATA-less	-0.0490423	0.559083	-0.948366
YDR430C	CYM1	TFIID		0.154216	-0.508609	-1.23347	-0.507151	-1.01892			0.208085	-0.108421		0.706693	-0.307184
YDR432W	NPL3	TFIID	TATA-less	0.154216	-0.508609	-1.23347	-0.507151	-1.01892			0.208085	-0.108421		0.706693	-0.307184
YDR434W	GPI17	TFIID	TATA-containing	-0.102232	-0.444439	-1.83143
YDR435C	PPM1	TFIID		0.219198	0.0177997	-2.23322	-1.39969	-1.31119			-0.432545	-0.385948		0.280927	-0.225182
YDR436W	PPZ2	TFIID	TATA-less	0.203869	-0.024132	-3.04982
YDR437W	GPI19	TFIID	TATA-less	0.109773	0.217012	-1.71798	-0.64838					-0.301726
YDR438W	THI74	TFIID
YDR439W	LRS4	TFIID	TATA-less	0.101595	0.737381	-1.68058	-0.575276					-0.57536
YDR440W	DOT1	TFIID
YDR441C	APT2	TFIID	TATA-containing		-0.543101		-0.580412			-0.153292		-0.406298
YDR443C	SSN2	TFIID	TATA-less	-0.171015	0.521485	-0.779688
YDR444W	YDR444W	TFIID	TATA-less	-0.171015	0.521485	-0.779688
YDR446W
YDR447C	RPS17B	TFIID	TATA-less					-0.576675		-0.324289	-0.0965			0.0689049	-0.198936
YDR448W	ADA2	TFIID	TATA-containing		-0.46869		-0.66807	-0.576675		-0.324289	-0.0965	-0.36276		0.0689049	-0.198936
YDR449C	UTP6	TFIID	TATA-less					-0.245347
YDR450W	RPS18A	TFIID	TATA-less	-0.0981969		-0.412405	-0.586008	-0.454218		-0.646912	-0.378087	-0.519185		0.180476	-0.174461
YDR451C	YHP1	CR	TATA-containing					-0.772944
YDR452W	PPN1	TFIID	TATA-less	0.0377605	-0.230275	-1.16734	-0.9457	-0.907536			-0.825843	-0.197354		-0.24118	-0.696694
YDR453C	TSA2	CR	TATA-less	-0.0440462		-1.79814				-1.52412
YDR454C	GUK1	TFIID	TATA-less
YDR456W	NHX1	TFIID	TATA-less	-0.02022	-0.125791	-1.06179	-0.568905	-1.18798				-0.29033
YDR457W	TOM1	TFIID	TATA-less	-0.195696	0.484791	-0.608423		-0.477666
YDR458C	HEH2	TFIID	TATA-less	0.0890507	0.215326	-1.49889	-0.510401					-0.639074
YDR459C	PFA5	TFIID	TATA-less	0.0890465	0.572762	-1.23743	-0.727763					-0.296382
YDR460W	TFB3	TFIID	TATA-less	0.0890465	0.572762	-1.23743	-0.720096					-0.297988
YDR461C-A				-0.225749	0.0048732		-0.595185	-0.864102				-0.708783
YDR461W
YDR462W	MRPL28	TFIID	TATA-less	-0.225749	0.0048732	-0.855759		-0.864102
YDR463W	STP1	TFIID	TATA-less	0.0878509	0.318759	-0.521579	-0.407653	-0.695663				-0.377992
YDR464W	SPP41	TFIID	TATA-less	-0.0853128	0.281073	-0.398974
YDR465C	RMT2	TFIID	TATA-less
YDR466W	PKH3	TFIID	TATA-less	-0.133109	0.316848	-1.21033		-0.840148
YDR468C	TLG1	TFIID	TATA-less	0.0772942	0.366804	-1.21065	-0.517654					-0.443454
YDR469W	SDC1	TFIID		0.0772942	0.366804	-1.21065	-0.520715					-0.44543
YDR470C	UGO1	TFIID		0.0147116	-0.0921543	-0.798826	-0.58454	-0.969018		-0.699015	0.168596	-0.355519		0.330987	-0.205874
YDR471W	RPL27B	TFIID	TATA-less					-0.72323		-0.701828	0.168596			0.330987	-0.205874
YDR472W	TRS31	TFIID	TATA-less	0.1158	-0.490755	-1.38913	-0.479722	-0.809637	-0.756257	-0.829366	-0.682882	-0.587625	-0.758892	0.0502211	-0.560549
YDR473C	PRP3	TFIID	TATA-less	0.085574	0.369819	-1.45451
YDR475C	JIP4	TFIID	TATA-less	0.0254452	-0.291128	-1.55394	-1.2275	-1.28763		-0.672311	-0.61508	-0.364435		0.0224378	-0.44312
YDR476C	YDR476C	TFIID	TATA-containing	0.0634322	-0.364286	-1.76365	-1.17814	-1.33568		-0.367366	-0.175321	-0.492056		-0.111569	-0.518666
YDR477W	SNF1	TFIID	TATA-less	0.0904826	-0.041889	-1.17897	-0.903108	-1.38216			-0.303918	-0.345409		-0.440181	-0.625285
YDR478W	SNM1	TFIID	TATA-less
YDR479C	PEX29	TFIID	TATA-less	0.0780221	-0.0694932	-1.17	-1.35428	-1.7267			-0.327952	-0.575722		-0.226935	-0.681804
YDR480W	DIG2	TFIID	TATA-less	0.0780221	-0.0694932	-1.17	-1.35428	-1.69744			-0.585071	-0.575722		-0.326515	-0.560307
YDR481C	PHO8	TFIID	TATA-containing	-0.0241432	-0.489261	-1.47713	-0.881259			-0.83564	-0.749775	-0.421684		0.290157	-0.349503
YDR482C				0.168103	-0.334571		-0.350786	-0.987402	-1.08879	-1.28131	-0.76184	-0.143037	-0.155874	-0.243246	-0.266285
YDR483W	KRE2	TFIID	TATA-less	0.168103	-0.334571	-0.827785	-0.350786	-0.987402	-1.08879	-1.28131	-0.76184	-0.143037	-0.155874	-0.243246	-0.266285
YDR484W	VPS52	TFIID	TATA-less	0.175916	0.220136	-1.66365	-0.822499					-0.469659
YDR485C	VPS72	TFIID		-0.000796256	0.118402	-1.22463	-0.36282					-0.360721
YDR486C	VPS60	TFIID	TATA-less	0.106625	-0.107222	-1.26888	-0.776497					-0.373506
YDR487C	RIB3	CR	TATA-containing	-0.0549263		-0.623446	-0.605571		-0.577015	-0.795703	-0.264406	-0.310298	0.103489	-0.0240011	-0.0753465
YDR488C	PAC11	TFIID	TATA-less	-0.132187	0.201439	-1.10093	-0.710987					-0.857254
YDR489W	SLD5	TFIID	TATA-less	-0.107013	0.201439	-1.02076	-0.711067					-0.857254
YDR490C	PKH1	TFIID	TATA-less	-0.106676	-0.325229	-0.867802					-1.04756			-0.479983	-0.639922
YDR492W	IZH1	CR	TATA-containing				-0.645807				-0.567717	-0.547342		0.135297	-0.669924
YDR493W	MZM1	TFIID	TATA-less	0.125944	-0.0387707	-1.18841	-0.933403					-0.455597
YDR494W	RSM28	TFIID	TATA-less	0.107128	0.0159908	-0.704489	-0.832616	-0.950604			-0.218026	-0.280697		0.741493	-0.516743
YDR495C	VPS3	TFIID	TATA-less	-0.136283		-0.872817
YDR496C	PUF6	TFIID	TATA-less
YDR497C	ITR1	CR	TATA-containing								-0.506872			-0.375655	-0.627214
YDR498C	SEC20	TFIID	TATA-less	-0.00927735	0.387597	-0.762451	-0.356623					-0.231945
YDR499W	LCD1	TFIID	TATA-less	-0.4053	-0.0920948	-1.37783
YDR500C	RPL37B	TFIID	TATA-less				-0.0417037	-0.434102			-0.334891	-0.267975		0.62998	-0.124678
YDR501W	PLM2	TFIID
YDR502C	SAM2	CR	TATA-less	-0.0851238	-0.448991	-1.22147	-0.911849	-1.00403	-1.04269		-1.12946	-0.487771	-0.400039	-0.466293	-0.330749
YDR503C	LPP1	TFIID	TATA-less	-0.0987242	0.130035	-1.74084	-0.854347					-0.560105
YDR504C	SPG3	TFIID
YDR505C	PSP1	TFIID		-0.0329494	-0.34016	-0.581317	-0.633803	-0.965326	-0.927921	-0.914986	-0.176451	-0.28602	0.0121006	0.0721164	-0.135066
YDR506C	GMC1	TFIID	TATA-less	-0.117333	-0.496086	-0.946544	-1.01337				0.0888225	-0.79021		0.504256	-0.650524
YDR507C	GIN4	TFIID	TATA-less
YDR508C	GNP1	CR	TATA-containing				-0.496575	-0.89832	-1.3307	-1.41936	-0.662245	-0.392433	-0.176616	0.149465	-0.129993
YDR510W	SMT3	TFIID	TATA-less		-0.667575		-0.60489	-0.80429		-0.832834	-1.01665	-0.378269		-0.318571	-0.576086
YDR511W	SDH7	TFIID	TATA-less	0.218857	-0.556382	-1.72254	-0.997068	-0.93069				-0.512001
YDR512C	EMI1	TFIID	TATA-less	0.0471339	-0.657311	-1.61502	-1.50058	-1.63023	-0.886346	-1.03212	-0.477523	-0.40449	-0.148435	0.334935	-0.799288
YDR513W	GRX2	CR	TATA-containing	0.0471339	-0.657311	-1.61502	-1.50058	-1.63023	-0.879658	-1.03212	-0.477523	-0.40449	-0.154089	0.334935	-0.799288
YDR514C	YDR514C	TFIID			0.75134
YDR515W	SLF1	TFIID			0.750902
YDR516C	EMI2	TFIID	TATA-containing				-1.04225	-1.3694	-1.79575	-1.54729	-0.853329	-0.0478132	-0.454511	-0.19075	-0.395388
YDR517W	GRH1	TFIID	TATA-less	0.0270754	-0.328464	-0.754283		-1.07316	-1.63563	-1.25708	-0.542032		-0.435182	-0.113534	-0.235085
YDR518W	EUG1	TFIID	TATA-less	-0.0949445		-0.643377					-0.639547			0.612739	-1.27397
YDR519W	FPR2	TFIID	TATA-less	-0.0512626	0.159904	-1.34265	-0.802265					-0.507045
YDR520C	URC2	TFIID	TATA-less	-0.177592	0.272102	-0.638676		-1.03046
YDR522C
YDR523C
YDR524C	AGE1	TFIID	TATA-less		-0.530606		-0.696465	-1.10584	-0.682116	-0.612924	-0.363793	-0.386406	-0.271275	0.392637	-0.422881
YDR524C-B	YDR524C-B	CR	TATA-containing						-0.610432	-0.624823	-0.607952		-0.0933444	0.181089	-0.174051
YDR524W-C									-0.610432	-0.624823			-0.274425
YDR525W-A	SNA2	TFIID	TATA-less		-0.662081		-0.742712	-0.705341	-0.812427	-0.952342	-0.803777	-0.262084	-0.231371	-0.100664	-0.431864
YDR527W	RBA50	TFIID			-0.97112		-0.610621	-1.08205	-0.977887	-0.58281	-0.565506	-0.522914	-0.0387039	-0.106673	-0.134182
YDR528W	HLR1	CR	TATA-containing
YDR529C	QCR7	TFIID	TATA-less	-0.0599226	-0.265952	-0.791023	-0.838453	-1.11443			-0.192318	-0.340295		0.64662	-0.455226
YDR530C	APA2	TFIID	TATA-less	0.097558	-0.177055	-1.44527		-1.68107			-0.482085			0.565036	-0.45243
YDR531W	CAB1	TFIID	TATA-less	0.097558		-1.44527	-0.996088	-1.68107			-0.482085	-0.454062		0.565036	-0.45243
YDR532C	KRE28	TFIID	TATA-less	-0.0146612	-0.0461124	-2.16854	-1.20027					-0.664612
YDR533C	HSP31	CR	TATA-containing							-0.402979	-0.390833			0.103942	-0.357201
YDR534C	FIT1	CR	TATA-less
YDR536W										-1.37502
YDR538W	PAD1	TFIID
YDR539W	FDC1	TFIID	TATA-less
YDR540C
YDR541C	YDR541C	TFIID
YDR542W
YDR545W									-0.377406	-0.495567	-0.356701		-0.105392	-0.0438868	-0.0707338
YEL001C	IRC22	TFIID	TATA-less		-0.0588176			-0.874719
YEL002C	WBP1	TFIID	TATA-less	-0.12023	0.176798	-0.615329	0.0913989	-0.937006				-0.394135
YEL003W	GIM4	TFIID	TATA-less	-0.06981	0.48673	-0.852829	-0.311478					-0.471757
YEL004W	YEA4	TFIID		-0.0224087	0.236112	-2.55522	-0.869129					-0.571776
YEL005C	VAB2	TFIID		-0.0224087	0.236112	-2.55522	-0.851674					-0.581177
YEL006W	YEA6	TFIID	TATA-containing	0.109564	0.125114	-1.27267	-0.892468				-0.834553	-0.120587		0.474536	-0.679
YEL007W	MIT1	CR	TATA-less				-0.78451	-0.985495	-0.614922	-0.0688692	-0.606605	-0.213702	-0.346685	0.177584	0.846222
YEL009C	GCN4	CR					-0.36932	-0.982011	-0.344532	-0.276497	-0.335264	0.0626188	-0.264456	0.345594	0.603113
YEL011W	GLC3	CR		0.116602	-0.427532	-1.81594		-1.18116	-1.72759	-1.51939	-0.814121		-0.26423	0.106865	-0.265546
YEL012W	UBC8	TFIID	TATA-less	0.04376	-0.0367966	-0.787824	-0.708768	-1.22486	-0.929753	-0.881164	-0.775383	-0.280888	-0.0597651	-0.0359586	-0.493038
YEL013W	VAC8	TFIID	TATA-less	0.197566	0.0253027	-0.681336	-0.526754	-0.945208		-0.574974	-0.134098	-0.189799		0.443295	-0.626566
YEL015W	EDC3	TFIID	TATA-less	0.0194522	0.365694	-1.11115	-0.300161					-0.18126
YEL016C	NPP2	TFIID		0.0194522	0.365694	-1.11115	-0.301755					-0.181494
YEL017C-A	PMP2	CR	TATA-less	0.0602627	-0.708559	-0.593625	-0.661966	-1.12766	-0.527284	-0.738352	-0.362165	-0.159745	-0.0263999	0.108664	0.29246
YEL017W	GTT3	TFIID	TATA-less	-0.306981	-0.143087	-0.925814	-0.813152		-0.822986	-0.573399		-0.246661	-0.356392
YEL018W	EAF5	TFIID	TATA-less	-0.115561	-0.0516358	-1.55062
YEL019C	MMS21	TFIID		-0.115561	-0.0516358	-1.55062
YEL020C	YEL020C	TFIID		-0.0986702		-0.893582
YEL020W-A	TIM9	TFIID	TATA-containing	0.114788	-0.444854	-1.5474					-0.642428			0.118297	-0.522482
YEL021W
YEL022W	GEA2	TFIID	TATA-less	-0.155125	0.0676725	-0.675182					-0.361592			0.504616	-0.900377
YEL023C	YEL023C	TFIID		-0.155125	0.0676725	-0.675182					-0.361592			0.504616	-0.900377
YEL024W	RIP1	TFIID	TATA-less	-0.0754334	-0.350393	-0.710273	-0.468838	-0.574937			-0.305426	-0.0904634		0.685753	-0.349388
YEL025C	YEL025C	TFIID	TATA-less	0.00836168	-0.139321	-0.980537	-0.569305	-1.08812			-0.160306	-0.275244		1.01868	-0.626172
YEL026W	SNU13	TFIID	TATA-less	-0.14889	-0.713629	-0.410949	-0.2224	-0.857038		-0.499248	-0.232393	-0.388801		0.445016	-0.672332
YEL027W	VMA3	TFIID	TATA-less	0.043805	-0.0137129	-1.267	-0.410462	-1.16569	-1.05173	-0.723172	-0.834716	-0.188655	-0.270141	0.108914	-0.262148
YEL029C	BUD16	TFIID	TATA-less	0.0635564	-0.0615857	-1.66162
YEL030W
YEL031W	SPF1	TFIID	TATA-less	0.111218	0.355856	-0.856612	-0.0696078	-0.969318			0.401894	-0.242761		0.679616	-0.462839
YEL032W	MCM3	TFIID	TATA-less							-0.601332
YEL033W	MTC7	CR
YEL034W	HYP2	CR	TATA-containing				-0.563027	-0.838067	-0.647265	-0.688969	-0.306344	-0.407173	-0.176135	-0.179194	-0.366412
YEL035C							-0.563027	-0.838067	-0.610509	-0.688969	-0.306344	-0.407173	-0.218424	-0.179194	-0.366412
YEL036C	ANP1	TFIID	TATA-less	-0.377446	-0.862038	-0.605421	-0.963403	-1.11652	-0.931237	-0.571474		-0.311443	-0.0774267
YEL037C	RAD23	TFIID	TATA-less	-0.0155456	-0.0973151	-0.518642	-0.39947	-0.766559		-0.334747	0.275945	-0.250454		0.630883	-0.492734
YEL038W	UTR4	TFIID	TATA-less								-0.908942			-0.13886	-0.504485
YEL039C											-0.908942			-0.13886	-0.504485
YEL040W	UTR2	CR	TATA-containing							-0.400999	-0.453703			-0.302981	0.18821
YEL041W				-0.399804	0.130036
YEL042W	GDA1	TFIID	TATA-less				-0.304636					-0.302025
YEL043W	YEL043W	TFIID	TATA-less	-0.142278	-0.380456	-0.7833	-0.703732	-0.975359			-0.417858	-0.339743		0.648266	-0.114277
YEL044W	IES6	TFIID	TATA-less					-0.882885	-0.925922	-0.581981	-0.60064		-0.144613	-0.11921	0.203713
YEL046C	GLY1	CR	TATA-containing				-0.43446	-1.08826	-0.1926	-0.515781	-0.626327	-0.234203	-0.0503402	0.0669257	0.182475
YEL047C	FRD1	TFIID	TATA-containing	-0.466221	-0.629129	-0.98844					-1.08112			0.337845	-0.981698
YEL048C	TCA17	TFIID	TATA-less
YEL049W
YEL050C	RML2	TFIID	TATA-less	0.125433	0.215594	-1.0154	-0.809155	-1.22619		-0.312946	-0.127927	-0.337034		0.745724	-0.313821
YEL051W	VMA8	TFIID	TATA-less	0.294714	0.582498	-0.581415	-0.509389	-0.93807		-0.516668	-0.108557	-0.200194		0.462921	-0.545599
YEL052W	AFG1	TFIID	TATA-less	0.105723	0.520708	-1.40512	-1.06661	-1.10825				-0.657161
YEL053C	MAK10	TFIID	TATA-less	0.105723	0.520708	-1.40512	-1.06661	-1.10375				-0.657161
YEL054C	RPL12A	TFIID	TATA-less				-0.49242	-0.439452		-0.736808	-0.195672	-0.634061		0.251716	-0.350414
YEL055C	POL5	TFIID
YEL056W	HAT2	TFIID	TATA-less	-0.0338607	0.040866	-1.27508	-0.646194	-1.12042				-0.407097
YEL057C											-0.864806			-0.162836	-1.11563
YEL058W	PCM1	TFIID	TATA-less	0.000562672	0.47741	-1.04178
YEL059C-A					-0.1076						-0.0743399			0.281866	-0.312129
YEL060C	PRB1	CR	TATA-containing					-0.783202	-0.813538	-0.638119	-0.532851		-0.318997	0.223478	-0.00468434
YEL061C	CIN8	TFIID	TATA-less	-0.109098		-0.553352					-0.209566			0.293358	-0.390443
YEL062W	NPR2	TFIID	TATA-less	0.0327142	-0.116683	-1.25601	-1.04208	-0.814478				-0.427885
YEL063C	CAN1	TFIID	TATA-less	-0.00773659	-0.123903	-0.619119	-1.02076	-0.891049	-0.770721	-0.602463	0.460292	-0.252927	0.239128	0.760019	-0.244083
YEL064C	AVT2	TFIID
YEL065W	SIT1	CR	TATA-containing								-1.06617			0.368625	0.379806
YEL066W
YEL067C
YEL068C	YEL068C	TFIID	TATA-less	-0.000794914	0.577778	-1.71056
YEL069C
YEL070W
YEL071W	DLD3	CR	TATA-containing					-1.1132	-0.780997	-0.821699	-0.516594		-0.413632	0.302346	0.501897
YEL072W	RMD6	TFIID	TATA-less	-0.0821198	-0.426202	-0.655547	-0.861872	-1.2793		-0.972137	-0.669887	-0.268999		-0.350734	0.184549
YEL073C
YEL075C
YEL076C
YEL076C-A
YEL077C
YER001W	MNN1	CR	TATA-containing				-0.885544	-0.739428	-0.208684	-0.242642	-0.849849	-0.503162	-0.410619	0.41094	0.0346796
YER002W	NOP16	TFIID	TATA-less	-0.118765	0.319613	-0.530002	-0.642617	-0.706554			-0.631417	-0.486905		0.633661	-0.414655
YER003C	PMI40	TFIID	TATA-less	-0.204775	0.185779	-0.914434	-0.593494	-0.852364			-0.086779	-0.389493		0.68943	-0.530972
YER004W	FMP52	TFIID	TATA-less	-0.204775	0.185779	-0.914434		-0.818351
YER005W	YND1	TFIID	TATA-containing	0.0404592	0.118519	-1.34424	-0.404231					-0.522735
YER006W	NUG1	TFIID	TATA-less	-0.119813	0.466633	-0.728165
YER007C-A	TMA20	TFIID	TATA-less	-0.0193868	0.0956282	-1.40343	-0.693112					-0.248739
YER007W	PAC2	TFIID
YER008C	SEC3	TFIID	TATA-less	0.0872645	0.379211	-1.08163	-0.0892017	-1.03933			0.079544	-0.269345		0.850358	-0.332162
YER009W	NTF2	TFIID		0.0872645	0.379211	-1.08163	-0.0892017	-1.03933			0.0818883	-0.269345		0.850358	-0.332162
YER010C	YER010C	TFIID	TATA-less
YER011W
YER012W	PRE1	TFIID	TATA-less	0.23596	0.230533	-1.12941	-0.495011	-0.680953		-0.0782879	0.84121	-0.0966962		1.05198	-0.352565
YER013W	PRP22	TFIID	TATA-less	-0.0144158	0.134476	-1.14744	-0.49704	-0.812258			-0.331169	-0.239257		0.0439365	-0.512352
YER014C-A
YER014W	HEM14	TFIID			0.624801
YER015W
YER016W	BIM1	TFIID	TATA-less	-0.0799772	0.499859	-1.42101	-0.640884					-0.555033
YER017C	AFG3	TFIID	TATA-less	0.196297	0.060049	-1.02687	-0.00858648	-0.566321		-0.545585		-0.100817
YER018C	SPC25	TFIID	TATA-less	-0.0740262	-0.583315	-1.20379		-1.01858			-0.132188			0.0731577	-0.42075
YER019C-A	SBH2	TFIID	TATA-less	-0.0927337	-0.322267	-0.5373	-0.951605	-1.30588	-0.92996	-0.743791	-0.288092	-0.244833	-0.181036	-0.104699	-0.0553354
YER019W	ISC1	TFIID	TATA-less	-0.0743183	-0.583315	-1.20163		-1.06066			-0.132188			0.0731577	-0.42075
YER020W	GPA2	TFIID	TATA-containing	-0.0905986		-0.58427		-1.30966	-0.89793	-0.763074	-0.498762		-0.226427	-0.0497625	0.104215
YER021W	RPN3	TFIID	TATA-less	0.101495	0.319298	-0.347753	0.318612	-0.695974		-0.724139	0.262671	-0.0208625		0.204358	-0.333887
YER022W	SRB4	TFIID	TATA-less	-0.161692	0.188972	-1.55665
YER023W	PRO3	TFIID	TATA-less	-0.0868513	0.070197	-1.23349				-0.755331
YER024W	YAT2	TFIID
YER025W	GCD11	TFIID	TATA-less	-0.146323	0.184241	-0.715627	-0.151819	-0.88156			0.384345	-0.267231		0.425177	-0.0917139
YER026C	CHO1	CR	TATA-containing	-0.228559	0.0163341	-0.73471		-1.23754		-0.619147	-0.598893			0.399959	-0.502435
YER027C	GAL83	TFIID	TATA-less	0.0177438	0.186103	-1.72043	-1.04488				0.0741049	-0.0758656		1.13285	-0.346192
YER028C	MIG3	CR	TATA-containing				-0.773321				0.0763177	-0.035099		1.42768	0.726139
YER029C	SMB1	TFIID	TATA-less	-0.0250615	0.239003	-1.17971					0.290257			1.05937	-0.408752
YER030W	CHZ1	TFIID		-0.0250615	0.239003	-1.17971					0.290161			1.0606	-0.407264
YER031C	YPT31	TFIID	TATA-less	-0.167778	0.184654	-0.904455	-0.32634	-0.578543				-0.338403
YER032W	FIR1	TFIID	TATA-less	-0.167778	0.229913	-0.904455	-0.328175	-0.578543				-0.341491
YER033C	ZRG8	TFIID	TATA-less	-0.0339291	-0.246805	-0.699683	-0.916511	-0.713867		-0.71112		-0.389783
YER034W	YER034W	TFIID								-0.719343	-0.721042			-0.0279385	0.102686
YER035W	EDC2	CR	TATA-containing				-0.687641	-0.769828	-0.715115	-0.596776	-0.509734	-0.463805	-0.0847494	-0.374116	0.218173
YER036C	ARB1	TFIID	TATA-containing	0.046273	-0.744029	-0.619981	-0.303134		-0.551325	-0.417797	-0.351633	-0.486343	0.203179	0.241379	-0.519724
YER037W							-0.579033	-0.429297	-0.50629	-0.871674	-0.249138	-0.268167	0.0145778	0.214059	-0.289114
YER038C	KRE29	TFIID		-0.0570689	0.236972	-1.7697	-0.792617					-0.580436
YER038W-A				-0.0543126	0.448283		-0.466998					-0.606793
YER039C				-0.339761	-0.0458982						0.0343389			0.068289	-0.401306
YER039C-A	YER039C-A	TFIID		-0.339761	-0.0458982	-0.893306					0.0343389			0.068289	-0.401306
YER040W	GLN3	TFIID	TATA-less	-0.339761	-0.0458982	-0.893306					0.0343389			0.068289	-0.401306
YER041W	YEN1	TFIID
YER042W	MXR1	CR	TATA-containing	-0.203957		-1.52389					-0.673773			-0.155786	0.0672269
YER043C	SAH1	CR	TATA-less	-0.133581	-0.704401	-1.02896	-0.743146	-1.09302			-0.425737	-0.446363		-0.00223019	-0.129703
YER044C	ERG28	CR	TATA-containing	-0.149758	-0.824548	-0.752277	-1.25736	-1.18964	-0.946616	-0.73446	-0.298033	-0.384713	-0.120059	0.214638	-0.399998
YER044C-A
YER045C							-1.07553			-0.691882		-0.360775
YER046W	SPO73	TFIID		-0.0367599		-1.57457			-0.831591	-0.483	-0.668534		-0.311996	0.340724	0.0398049
YER047C	SAP1	TFIID	TATA-less	0.134212	0.11938	-0.901349	-0.643657	-0.917705			-0.308184	-0.1972		0.778808	-0.519045
YER048C	CAJ1	TFIID	TATA-less	0.159265	0.111272	-1.31339	-0.815135	-0.813799			-0.180815	-0.428308		0.511035	-0.379995
YER048W-A	ISD11	TFIID	TATA-less	0.0360285	-0.247944	-0.734828	-0.491936	-0.355748				-0.283004
YER049W	TPA1	TFIID	TATA-less	-0.063322	-0.450956	-0.770459	-0.805449	-0.809592			-0.542352	-0.438483		0.838941	-0.804144
YER050C	RSM18	TFIID	TATA-less	0.0138763	0.354416	-0.414063	-0.413656	-0.878391		-0.672879	-0.163629	-0.137126		0.719647	-0.646475
YER051W	JHD1	TFIID	TATA-less	0.0138763	0.354416	-0.414063	-0.401166	-0.878391		-0.673999	-0.163629	-0.143299		0.719647	-0.646475
YER052C	HOM3	CR	TATA-containing	-0.228392		-0.461947	-0.698834	-0.964338	-0.721064	-0.931372	-0.450441	-0.314911	-0.0099001	-0.34921	0.303182
YER053C	PIC2	CR	TATA-less	-0.208083	-0.656162	-0.840448	-1.04606	-1.25025	-1.24702	-1.62129	-0.930986	-0.228623	-0.264709	-0.225367	-0.26367
YER053C-A									-0.603501	-0.92666	-0.97242		-0.420843	-0.275316	-0.456126
YER054C										-2.00119
YER055C	HIS1	CR	TATA-less				-0.382798		-0.870467	-1.01889	-0.358545	-0.312642	-0.255084	-0.338941	-0.136917
YER056C	FCY2	CR	TATA-containing				-0.557189			-0.656414	-0.419338	-0.305287		-0.0958092	0.194392
YER056C-A	RPL34A	TFIID	TATA-less					-0.489019	-0.569309	-0.588912	-0.121549		-0.133926	0.341493	0.039879
YER057C	HMF1	TFIID	TATA-less					-1.07924
YER058W				-0.00719551	-0.0442539			-1.07848			-0.408541			0.666908	-0.342687
YER059W	PCL6	TFIID	TATA-less	0.123593	0.287707	-0.810336	-0.726496	-1.0468		-0.864049	-0.257392	-0.34772		0.582343	-0.932232
YER060W	FCY21	TFIID	TATA-containing
YER060W-A
YER061C	CEM1	TFIID	TATA-less
YER062C	GPP2	CR	TATA-containing						-0.817195	-0.945163	-0.629817		-0.0862128	0.259084	0.037439
YER063W	THO1	TFIID	TATA-less	0.0705095	-0.588168	-1.07592	-1.27037	-1.34105	-1.2607	-1.15683	-0.606917	-0.323763	-0.117644	-0.106174	-0.430551
YER064C	VHR2	CR	TATA-containing					-0.894952	-0.910808	-1.02081	-0.463893		-0.310718	-0.0865691	0.391163
YER065C	ICL1	TFIID	TATA-less				-1.12362	-0.859755				-0.343315
YER066W				-0.0505779	-0.205392
YER067W	RGI1	CR		0.299454	0.101889	-0.74157	-1.08908	-1.43878	-1.84702	-1.57774	-0.930299	-0.160604	-0.283041	-0.101193	-0.525922
YER068W	MOT2	TFIID	TATA-less	0.197264	0.037624	-0.586671	-0.575269	-1.0351		-1.36125	-0.831471	-0.0220189		-0.0799777	-0.197853
YER069W	ARG5,6	CR	TATA-less					-0.469789	-0.486175	-0.892361	-0.635721		-0.0995123	-0.179987	0.229526
YER070W	RNR1	CR	TATA-containing
YER071C	TDA2	TFIID	TATA-less	0.0635595	-0.389618	-0.605778	-1.2485	-1.21459	-0.978122	-1.2365		-0.363474	0.0612206
YER072W	VTC1	CR	TATA-less	0.0635595	-0.389618	-0.605778	-1.24119	-1.22603	-0.978122	-1.2365	-0.426793	-0.364043	0.0612206	0.16976	-0.282802
YER073W	ALD5	CR	TATA-containing						-1.06456	-0.734772	-0.852634		-0.284156	-0.221821	0.342882
YER074W	RPS24A	TFIID	TATA-less					-0.570668		-0.329713	-0.338125			0.288808	-0.150212
YER074W-A	YOS1	TFIID	TATA-less	0.0465648	0.0892868	-1.63762	-0.553226	-0.544881				-0.163583
YER075C	PTP3	TFIID	TATA-less				-0.857697		-0.504829	-0.304055	-0.506741	-0.590262	-0.527297	0.18785	0.0764638
YER076C				0.0948058	0.235036		-1.17799					-0.421402
YER077C	YER077C	TFIID	TATA-less
YER078C	ICP55	TFIID		-0.0367807	-0.06537	-1.62546	-1.13917	-1.81241	-1.05485	-1.28983	-0.619997	-0.360473	-0.00317979	0.34497	-0.634354
YER078W-A				0.0918125	-0.0767908		-1.00883	-1.19397	-0.398675	-0.543962	-0.177284	-0.351287	0.0990001	0.843894	-0.415287
YER079W	YER079W	TFIID	TATA-less	-0.0367807	-0.06537	-1.62546	-1.19126	-1.81241	-1.05563	-1.28983	-0.619997	-0.38062	-0.0049154	0.34497	-0.634354
YER080W	AIM9	TFIID	TATA-less	0.0304484	-0.0137817	-1.22767	-1.04871	-0.91964			-0.54083	0.0161524		0.641631	-0.582114
YER081W	SER3	CR	TATA-containing
YER082C	UTP7	TFIID	TATA-less	0.0642724		-0.189907
YER083C	GET2	TFIID	TATA-less		0.391084			-0.934049			-0.150425			1.34516	-0.573132
YER084W					0.38782			-1.01102			-0.10181			1.34246	-0.59323
YER085C				-0.266549	0.040436		-0.529723	-0.734023				-0.756858
YER086W	ILV1	TFIID	TATA-less	-0.266549	0.0374236	-0.841657	-0.528665	-0.741135				-0.756923
YER087C-B	SBH1	TFIID	TATA-less	-0.0130721		-1.03692		-0.760734			-0.50987			0.72924	-0.466946
YER087W	AIM10	TFIID	TATA-less	-0.0137345	0.232115	-2.29716
YER088C	DOT6	TFIID	TATA-less				-0.902029	-1.20842	-1.17402	-1.01608	-0.627169	-0.236423	-0.387629	-0.599718	-0.542302
YER089C	PTC2	TFIID	TATA-less	0.038757	-0.367699	-0.561937	-0.423282	-0.974531	-0.492132	-0.484073	0.056809	-0.319522	-0.115544	0.431903	-0.0319608
YER090W	TRP2	TFIID	TATA-less	0.038757	-0.338848	-0.561937	-0.408888	-0.974531	-0.497569	-0.464517	0.056809	-0.312069	-0.116233	0.431903	-0.0319608
YER091C	MET6	CR	TATA-containing				-0.511906		-0.673807	-0.81986	-0.922801	-0.389309	-0.318963	-0.253588	0.497983
YER092W	IES5	TFIID	TATA-containing					-0.936616	-0.862866	-0.802953	-0.684413		-0.322944	-0.428873	0.305522
YER093C	TSC11	TFIID	TATA-less	0.10809	0.314307	-1.81484	-0.981544					-0.504161
YER093C-A	AIM11	TFIID		0.04105	-0.329719	-2.33873	-0.879276					-0.802049
YER094C	PUP3	TFIID	TATA-less	0.105526	0.54004	-0.984805	0.372163	-0.818046			0.337099	-0.283005		0.483135	-0.23034
YER095W	RAD51	TFIID						-0.771925			-0.0543451			0.697813	-0.437564
YER096W
YER098W	UBP9	TFIID		0.0115446	-0.600538	-1.09511	-0.955034	-1.06918	-0.802437	-0.765156	-0.286859	-0.398743	-0.0187605	0.211849	-0.226828
YER099C	PRS2	TFIID		0.0650614	0.0146371	-1.03149	-1.08797	-1.53395			0.0891469	-0.450681		0.384735	-0.386882
YER100W	UBC6	TFIID	TATA-less				-1.08797	-1.45801			0.404144	-0.450681		0.789731	-0.412711
YER101C	AST2	TFIID	TATA-less	0.138532	-0.111509	-1.49393	-1.27254					-0.351918
YER102W	RPS8B	TFIID	TATA-less
YER103W	SSA4	TFIID	TATA-less	0.10035	-0.133166	-2.09905	-0.835977	-1.15034	-1.03978			-0.467996	-0.533191
YER104W	RTT105	TFIID	TATA-less	-0.139144	0.474188	-1.77988
YER105C	NUP157	TFIID	TATA-containing	-0.0992397	0.569003	-0.634547	-0.311652					-0.459955
YER106W				-0.0992397	0.569003		-0.312219					-0.459955
YER107C	GLE2	TFIID		0.0443761	0.493315	-0.756924	-0.743407					-0.389849
YER109C				-0.147847	0.570107		-0.960066					-0.333287
YER110C	KAP123	TFIID	TATA-less
YER111C	SWI4	TFIID	TATA-less		-0.236631
YER112W	LSM4	TFIID	TATA-less	0.134741	0.322318	-0.790567	-0.0875884	-0.675654			0.0747956	-0.240125		0.753744	-0.841905
YER113C	TMN3	TFIID	TATA-less	-0.291019		-1.73046
YER114C	BOI2	TFIID	TATA-less	-0.0774204	0.0909515	-0.573119	-0.406684	-0.670134			-0.195528	-0.333762		0.610875	-0.210756
YER115C	SPR6	TFIID		-0.168136	0.283402	-1.66004
YER116C	SLX8	TFIID	TATA-less	-0.0174266	-0.0250332	-0.649057	-0.879031	-0.649823				-0.437198
YER117W	RPL23B	TFIID	TATA-less				-0.427923	-0.622797			-0.338667	-0.331311		-0.0609548	0.0168366
YER118C	SHO1	TFIID	TATA-containing
YER119C	AVT6	TFIID	TATA-less	0.10478	0.162168	-0.605519	-0.812454	-1.24078			0.190271	-0.221044		0.18442	-0.519575
YER120W	SCS2	TFIID	TATA-less	0.10478	0.162168	-0.605519	-0.812454	-1.24078			0.190271	-0.221044		0.18442	-0.519575
YER121W				-0.15269	-0.575919		-1.33562	-1.16402			-1.03017	-0.632719		0.0262904	-1.29667
YER122C	GLO3	TFIID	TATA-containing	0.0104982	0.262468	-0.610266	-0.764196	-1.39083				-0.250904
YER123W	YCK3	TFIID	TATA-less	0.0104982	0.262468	-0.610266	-0.764196	-1.39083				-0.250904
YER124C	DSE1	CR	TATA-containing						-0.520059	-0.635215	-0.450868		-0.192307	-0.219674	-0.626306
YER125W	RSP5	TFIID		0.298417	0.433474	-0.626965	-0.240829	-0.541599	-0.647197	-1.08172	-0.499091	-0.187845	-0.333065	0.223305	-0.608011
YER126C	NSA2	TFIID	TATA-less
YER127W	LCP5	TFIID	TATA-less
YER128W
YER129W	SAK1	TFIID		-0.0527939	0.346713	-0.953021	-0.545432	-0.840446			0.377294	-0.308337		0.527921	-0.181833
YER130C	COM2	CR	TATA-containing					-0.809091	-0.898814	-0.390407	-0.468674		-0.0777167	-0.196672	-0.0415658
YER131W	RPS26B	TFIID	TATA-less				-0.296438	-0.764034	-0.815528	-0.624729	-0.152925	-0.555567	-0.058731	-0.156681	-0.0582223
YER132C	PMD1	TFIID	TATA-less	-0.043414		-0.709015	-1.07599	-0.83954		-0.596783		-0.434914
YER133W	GLC7	TFIID	TATA-less	0.206947	-0.276234	-0.974164	-0.938907	-1.28422	-0.658221	-0.757827	-0.03886	-0.316942	0.076504	0.148733	-0.511042
YER134C	YER134C	TFIID	TATA-less	0.099604	-0.240035	-1.79125	-0.930939	-1.24365				-0.42454
YER136W	GDI1	TFIID	TATA-less	0.0571392	-0.561202	-0.878956	-0.627418	-1.38405	-0.943365	-0.741603	-0.702694	-0.260746	-0.213237	-0.0474465	-0.0970869
YER137C									-0.607432	-0.876897			-0.219991
YER137C-A									-0.611288	-0.454594	-0.542537		-0.31067	-0.431482	0.624707
YER138C									-0.611288	-0.454594	-0.542537		-0.31067	-0.431482	0.624707
YER138W-A	YER138W-A	CR							-0.410013	0.0114391	-0.403744		-0.146473	0.220702	0.828509
YER139C	RTR1	TFIID		0.0554684	0.210232	-1.32084	-1.32365					-0.42444
YER140W	EMP65	TFIID		0.0554684	0.208751	-1.32084	-1.32365					-0.42444
YER141W	COX15	TFIID	TATA-less	0.0469115	0.291737	-0.675466	-0.826188	-1.1918			-0.443884	-0.315078		0.561538	-0.509674
YER142C	MAG1	TFIID	TATA-less	0.216806	0.347861		-1.22525				0.211309	-0.246386		0.789134	-0.655893
YER143W	DDI1	TFIID		0.216806	0.347861	-1.27426	-1.22525				0.211309	-0.246386		0.789134	-0.655893
YER144C	UBP5	TFIID	TATA-less	-0.096702		-2.29478			-1.24408	-0.423865	-1.09053		-0.60852	-0.401284	-0.479804
YER145C	FTR1	CR	TATA-containing						-0.858578	-0.262657			-0.200364
YER146W	LSM5	TFIID	TATA-less				-0.810748	-0.924326	-0.879027	-0.531591	-0.553745	-0.320509	-0.209649	-0.122454	0.0642896
YER147C	SCC4	TFIID		0.0164034	0.0793335	-0.658209	-0.492637	-0.963753			-0.212864	-0.275715		0.626328	-0.335302
YER148W	SPT15	TFIID	TATA-less	0.0164034	0.0793335	-0.658209	-0.492637	-0.989615			-0.212864	-0.275715		0.626328	-0.335302
YER149C	PEA2	TFIID	TATA-less	-0.116706	-0.0535899	-0.946457	-0.894914		-1.08124	-1.11388		-0.56286	-0.286182
YER150W	SPI1	CR	TATA-containing				-0.781223	-0.980409	-1.11415	-0.899613		-0.324863	-0.368128
YER151C	UBP3	TFIID	TATA-less	-0.262785	0.085876	-0.434369		-0.543123			0.359287			0.997597	-0.745786
YER152C	YER152C	TFIID								-0.500932
YER153C								-0.824923	-0.594155	-0.190284	-0.264145		-0.516555	0.184216	0.14227
YER154W	OXA1	TFIID	TATA-less	-0.125533	0.26777	-1.64383	-0.725893	-0.864656	-0.629175	-0.263484	-0.370541	-0.479118	-0.545083	0.195998	0.13064
YER155C	BEM2	TFIID	TATA-less	-0.0558335	0.150769	-0.920233		-0.667172			-0.435636			0.336549	0.101786
YER156C	YER156C	TFIID	TATA-less	-0.0323781	0.249498	-0.791864	-0.798172	-0.844779				-0.424258
YER157W	COG3	TFIID	TATA-less	-0.0323781	0.160327	-0.791864	-0.798172	-0.90732			0.243891	-0.424258		0.412316	-0.222563
YER158C							-0.804447	-0.653374	-0.640352	-0.546955	-0.448593	-0.311752	-0.166842	0.0839787	0.371977
YER159C	BUR6	CR	TATA-less				-0.463368	-0.505933	-0.46607	-0.782379	-0.680186	-0.210555	-0.187576	0.0607275	0.412401
YER159C-A				-0.115162						-0.263629	-0.400265			-0.302687	0.914605
YER160C				-0.115162						-0.263629	-0.400265			-0.302687	0.914605
YER161C	SPT2	TFIID	TATA-less	0.132889	0.415597	-0.945621	-0.51865	-0.98473			0.555538	-0.37963		0.883395	-0.667162
YER162C	RAD4	TFIID	TATA-less	0.020439	-0.150909	-1.50337	-0.612204	-0.659793			-0.05382	-0.331695		1.30851	-0.64324
YER163C				0.247295	0.449845		0.750812	-0.852968		-0.551895	0.165279	-0.115065		0.096211	-0.367196
YER164W	CHD1	TFIID	TATA-less	0.0729243	-0.328297	-2.35167	-0.955734	-0.909588			-1.37574	-0.417981		-0.00305076	-1.47393
YER165W	PAB1	TFIID		0.0487238	-0.243302	-0.424632	-0.580176	-1.03813			-0.151528	-0.233775		0.418751	-0.280098
YER166W	DNF1	TFIID	TATA-less	-0.0715362	0.282616	-0.971041	-0.564237					-0.207374
YER167W	BCK2	TFIID	TATA-less
YER168C	CCA1	TFIID	TATA-less	-0.0504411	0.120451	-0.661938			-0.358167	-0.506258			-0.145246
YER169W	RPH1	TFIID	TATA-less	0.0460595	-0.439414	-0.670276	-0.752812	-0.881773	-0.356966	-0.506258	-0.431033	-0.442978	-0.145246	0.302223	-0.242557
YER170W	ADK2	TFIID	TATA-less	-0.0301883	0.0956227	-1.75492	-0.993792					-0.296487
YER171W	RAD3	TFIID	TATA-containing	0.045687	0.527071	-0.653868	-0.310067	-0.93595			0.0299376	-0.287118		0.602903	-0.677004
YER172C	BRR2	TFIID	TATA-less	-0.00312319	0.473346	-0.653774	-0.392661					-0.23218
YER173W	RAD24	TFIID		-0.00312319	0.473346	-0.653774	-0.392661					-0.23218
YER174C	GRX4	TFIID	TATA-less	-0.0823498	-0.502396	-1.58174	-1.18964	-0.930026			0.213144	-0.625347		0.892354	-0.833198
YER175C	TMT1	TFIID
YER175W-A	YER175W-A	TFIID
YER176W	ECM32	TFIID	TATA-less	-0.117637	-0.35813	-0.78231	-0.630146	-1.16349			-0.411818	-0.277856		0.551266	-0.421402
YER177W	BMH1	CR	TATA-less				-0.656123	-1.06081	-0.642235	-0.569567	-0.342676	-0.152273	-0.223487	0.119894	0.251279
YER178W	PDA1	TFIID	TATA-less	-0.0654262	-0.630291	-0.865535	-0.899503	-1.29546	-1.14185	-1.33772	-0.319583	-0.194447	-0.26766	-0.0279685	-0.0965326
YER179W
YER180C	ISC10	TFIID
YER180C-A	SLO1	TFIID	TATA-less								0.234143			0.858429	-0.365404
YER182W	FMP10	TFIID		0.313358	0.318269	-2.49453	-0.973672	-1.02795				-0.341457
YER183C	FAU1	TFIID	TATA-containing	0.204744	0.157592	-1.33422	-0.926902					-0.418224
YER184C	TOG1	TFIID	TATA-less	-0.11939	-0.100092	-1.80025	-0.844877	-1.23149	-0.676039	-0.605311	-0.430688	-0.55199	-0.33385	0.0705216	-0.524538
YER185W				-0.116666	-0.072673		-0.913006	-1.23149	-0.675024	-0.604575	-0.430688	-0.567304	-0.337125	0.0705216	-0.524538
YER186C	YER186C	TFIID		0.00141941	0.368147	-1.80396	-1.19568				-0.971278	-0.537305		0.0992254	-0.895908
YER187W
YER188C-A									-0.473278	-0.613944	-0.313715		-0.245713	-0.756898	0.31946
YER189W									-0.474662	-0.613944			-0.245713
YER190W									-0.474662	-0.613944			-0.245713
YFL001W	DEG1	TFIID		0.0397545	0.493396	-0.457678
YFL002C	SPB4	TFIID		0.0397545	0.493396	-0.457678
YFL002W-A				0.0134266	0.0798328				-0.462246	0.0740676	-0.097067		-0.688144	0.138391	0.57569
YFL002W-B				0.0134266	0.0798328				-0.462246	0.0740676	-0.097067		-0.688144	0.138391	0.57569
YFL003C
YFL004W	VTC2	CR	TATA-less	0.278605	0.127247	-1.18602	-1.18206	-1.4035	-1.03078	-1.26194	-0.68323	-0.492509	-0.0139117	0.219126	-0.416318
YFL005W	SEC4	TFIID	TATA-less	0.0886867	-0.111359	-1.62728	-0.792381	-1.11997				-0.30742
YFL007W	BLM10	TFIID	TATA-less	-0.29643	0.505142	-0.78618	0.0328568					-0.394121
YFL008W	SMC1	TFIID	TATA-less	-0.150516	0.346796	-0.796229	-0.879615	-1.02709				-0.379774
YFL009W	CDC4	TFIID	TATA-less	-0.0789471	-0.0832858	-1.31627	-0.631947	-0.965303			0.287456	-0.406377		0.815382	-0.511032
YFL010C	WWM1	TFIID	TATA-less	-0.0789471	-0.0832858	-1.31627	-0.631947	-0.965303			0.287456	-0.406377		0.815382	-0.511032
YFL010W-A							-0.422668			-0.617752	-0.60609	-0.731176		-0.0135668	-0.86985
YFL011W
YFL012W
YFL013C	IES1	TFIID	TATA-less	0.0372354	0.362154	-0.844238	-0.419373	-1.09888			0.135138	-0.581699		0.513071	-0.430155
YFL014W									-0.454588	-0.67898			-0.4222
YFL016C	MDJ1	TFIID	TATA-less				-0.434173	-0.995509	-0.892925	-0.94723	-0.524213	-0.238528	-0.186787	-0.475913	-0.387208
YFL017C	GNA1	TFIID	TATA-containing
YFL017W-A	SMX2	TFIID	TATA-less	-0.00794972	0.256735	-1.25985		-1.022	-0.110267	0.453411	-0.370328		-0.280127	0.342244	-0.406809
YFL018C	LPD1	TFIID	TATA-containing	0.0745658	-0.0336405	-0.502881	-0.839277	-1.16901	-1.12337	-0.698405	-0.172097	-0.0414705	-0.305249	0.297916	-0.335788
YFL020C
YFL021W	GAT1	CR	TATA-containing	-0.291453		-0.718464	-0.810003	-0.912805	-0.481319	-0.513587	-0.127199	-0.598364	-0.131499	0.156237	-0.0428775
YFL022C	FRS2	TFIID	TATA-less				-0.57575		-0.624917	-0.627254	-0.0930467	-0.423114	-0.156671	-0.158941	-0.107695
YFL023W	BUD27	TFIID	TATA-less				-0.412104		-0.615451	-0.636138	-0.252728	-0.44506	-0.168702	0.0341018	0.0523784
YFL024C	EPL1	TFIID	TATA-less	-0.19632	-0.675696	-1.26595	-1.01094	-0.911502	-0.615451	-0.636138	-0.252728	-0.252519	-0.168702	0.0341018	0.0523784
YFL025C	BST1	TFIID	TATA-less	-0.128086	0.384823	-1.43334
YFL026W
YFL027C	GYP8	TFIID	TATA-less	0.0319463	0.592766	-1.59836
YFL028C	CAF16	TFIID	TATA-less	-0.0412742	0.370282	-1.76617
YFL029C	CAK1	TFIID	TATA-less	0.0707057	0.394714	-2.13666	-0.852826					-0.340518
YFL030W				-0.0827643	-0.257936		-1.3941	-1.0308			-1.11442	-0.515948		-0.0728756	-1.07053
YFL031W	HAC1	CR	TATA-less				-0.595962	-0.655582	-0.434787	-0.463659	-0.00392672	0.0130383	-0.29483	-0.0171856	-0.124959
YFL033C	RIM15	TFIID	TATA-less	0.15546	-0.150885	-0.889505	-0.554809	-0.821388	-0.729078	-0.550781	-0.330627	-0.185109	-0.334247	0.0696364	-0.335548
YFL034C-A	RPL22B	TFIID	TATA-less				-0.181395	-0.466147				-0.302372
YFL034C-B	MOB2	TFIID	TATA-less	-0.122713	0.205486	-1.14552	-0.434941					-0.133946
YFL034W	YFL034W	TFIID	TATA-less	0.00487885	0.0612198	-0.617243	-0.341413	-0.465				-0.46065
YFL036W	RPO41	TFIID	TATA-less	0.141437	0.218072	-0.963661	-0.0882689	-0.40678		-0.739435	-0.0915894	-0.148285		0.907558	-0.212458
YFL037W	TUB2	TFIID	TATA-less	0.0437707	-0.247965	-1.12799	-0.480926	-1.10617	-0.702352	-0.198637	-0.0402369	-0.216368	-0.128058	0.161716	-0.329617
YFL038C	YPT1	TFIID	TATA-less	0.0437707	-0.359491	-1.12799	-0.480926	-1.10617	-0.698565	-0.182656	-0.0402369	-0.216368	-0.131217	0.161716	-0.329617
YFL039C	ACT1	TFIID	TATA-less	-0.0497004	-0.865887	-1.07112	-0.58453	-1.12399	-0.626138	-0.980332	-0.496153	-0.132699	-0.064021	-0.605437	-0.405483
YFL040W
YFL041W	FET5	TFIID	TATA-containing	-0.0387315	0.25276	-2.23526	-0.858334					-0.565896
YFL041W-A				0.180837	0.268612		-0.930785	-0.410811				-0.547248
YFL042C	YFL042C	TFIID	TATA-less	0.154464	0.24714	-2.52103	-0.974371	-1.03581				-0.520838
YFL044C	OTU1	TFIID	TATA-less	0.19397	0.118383	-2.26345	-0.858881					-0.417507
YFL045C	SEC53	TFIID	TATA-less	0.117916	0.162667	-1.09678	-0.770873	-0.862594			0.237374	-0.483219		0.270955	-0.405225
YFL046W	FMP32	TFIID		-0.0541625	0.163587	-1.44004	-0.732612					-0.721633
YFL047W	RGD2	TFIID	TATA-less	-0.0306999	0.11719	-1.07564	-0.40743					-0.272864
YFL048C	EMP47	TFIID	TATA-less	-0.0306999	0.11719	-1.07564	-0.376387					-0.268859
YFL049W	SWP82	TFIID	TATA-containing	-0.0518536	0.667663	-1.44051
YFL050C	ALR2	TFIID		-0.0518536	0.667663	-1.44051
YFL051C
YFL052W				-0.166091	-0.14411		-1.17239	-1.57214		-1.21495	-0.806088	-0.314525		-0.445626	-0.231576
YFL053W					0.360197
YFL054C				-0.299384	0.233974						-0.936643			0.794728	-0.711889
YFL055W				0.056569	0.0476567		-1.06353	-1.01943			-0.607925	-0.404735		0.0163992	0.328075
YFL058W
YFL059W
YFL060C
YFL061W
YFL062W
YFL064C
YFL065C
YFL066C
YFR001W	LOC1	TFIID	TATA-less
YFR002W	NIC96	TFIID	TATA-less	0.0402113	0.09556	-0.399853	-0.168439	-0.669116			0.240034	-0.430072		0.922343	-0.598261
YFR003C	YPI1	TFIID		0.311983	0.173864	-0.780583	0.0781228	-0.787363		-0.5802	0.572084	-0.125263		0.686233	-0.193149
YFR004W	RPN11	TFIID	TATA-less	0.311983	0.173864	-0.780583	0.0781228	-0.787363		-0.577051	0.572084	-0.125263		0.686233	-0.193149
YFR005C	SAD1	TFIID	TATA-less	0.0259967		-0.770345	-0.865531	-1.25708	-0.392305	-0.616819	-0.285237	-0.217923	-0.0965396	0.339752	0.0122334
YFR006W	YFR006W	TFIID		0.0370158		-0.763892	-0.837368	-1.25708	-0.39377	-0.616819	-0.285237	-0.244914	-0.0965396	0.339752	0.0122334
YFR007W	YFH7	TFIID	TATA-less	0.156109	-0.00386421	-2.14369	-1.14812					-0.442746
YFR008W	FAR7	TFIID	TATA-less	0.180478	0.278281	-1.78758	-1.00923	-1.1312				-0.312606
YFR009W	GCN20	TFIID	TATA-less		0.325098		-0.165618					-0.315785
YFR010W	UBP6	TFIID	TATA-containing	0.109124	-0.0338161	-1.40096	0.000142339					-0.147218
YFR011C	MIC19	TFIID	TATA-less	0.0373024	0.398004	-1.83104
YFR012W
YFR012W-A
YFR013W	IOC3	TFIID	TATA-less		0.444925
YFR014C	CMK1	TFIID		0.113215	0.115867	-1.17562	-1.02178	-1.47059	-1.43016	-2.0963	-0.69159	-0.220938	-0.182185	0.116134	-0.0899859
YFR015C	GSY1	CR	TATA-containing				-0.822113	-1.08277	-2.17962	-1.73004	-0.930372	-0.153867	-0.393565	-0.124902	0.0840707
YFR016C	YFR016C	TFIID	TATA-less	0.141266	-0.330666	-1.06474	-1.0444	-1.17434			-0.352691	-0.413783		0.262632	-0.62666
YFR017C								-0.608375	-1.48911	-1.06237	-0.414823		-0.270645	0.0387292	0.0135995
YFR018C				-0.109103	-0.0213408			-1.00087	-0.746121	-0.676326	-0.0555044		-0.19976	-0.294487	-0.509892
YFR019W	FAB1	TFIID		-0.109103	-0.0213408	-0.578328		-1.03955	-0.746121	-0.676326	-0.0555044		-0.19976	-0.294487	-0.509892
YFR020W	YFR020W	TFIID					-1.05843					-0.345099
YFR021W	ATG18	TFIID	TATA-less	0.0684048	0.419209	-1.38762	-1.12742	-1.15789				-0.44264
YFR022W				-0.0897499	0.158035			-0.983333		-0.605053	-0.677237			-0.680999	-0.516722
YFR023W
YFR024C-A	LSB3	TFIID	TATA-less	0.133978	0.176294	-1.51098	-0.849635	-1.13628			-0.279917	-0.418977		0.0718621	-0.551263
YFR025C	HIS2	TFIID	TATA-less	-0.0671465	-0.0393222	-1.22553	-0.735697				0.145414	-0.447092		0.649408	-0.546004
YFR026C				-0.0791088	0.539921
YFR027W	ECO1	TFIID		-0.0791088	0.539921	-1.28694
YFR028C	CDC14	TFIID	TATA-less	-0.114829	0.00781634	-0.765553	-0.496333	-1.01535			-0.391018	-0.626603		0.420386	-0.544242
YFR029W	PTR3	TFIID	TATA-less	-0.257621	0.0144832	-0.98591	-0.684351					-0.622845
YFR030W	MET10	TFIID	TATA-containing	-0.291315	-0.25226	-0.76445	-0.943571				-0.817096	-0.535875		-0.241623	0.126367
YFR031C	SMC2	TFIID	TATA-less	-0.0296001	0.557235	-1.28261
YFR031C-A	RPL2A	TFIID	TATA-less				-0.727322	-0.789202		-0.139126	-0.496338	-0.357627		-0.0899593	-0.312157
YFR032C
YFR032C-A	RPL29	TFIID	TATA-less	-0.0506497	-0.822037	-0.18725	-0.489717	-0.816138		-0.488576	-0.181301	-0.418272		0.534399	-0.310855
YFR032C-B	YFR032C-B	TFIID						-0.890401		-0.752005	-0.26573			0.403713	-0.331775
YFR033C	QCR6	CR	TATA-less				-0.554513		-0.714382	-0.529635	-0.188075	-0.388197	-0.160631	0.290816	0.12147
YFR034C	PHO4	CR	TATA-less	-0.202242	-0.694041	-0.294933	-0.837052	-0.908535	-0.792787	-0.656735	-0.313402	-0.51691	-0.0611537	0.0849715	-0.191735
YFR035C									-0.616128	-0.417442	-0.265131		-0.144689	-0.0165012	-0.506486
YFR036W									-0.639468	-0.417442	-0.280871		-0.143758	-0.0191516	-0.508012
YFR037C	RSC8	TFIID	TATA-less	-0.0380815	0.389745	-0.30706	-0.276076				0.715247	-0.253814		1.2571	-0.604772
YFR038W	IRC5	TFIID	TATA-less	-0.0380815	0.389745	-0.30706	-0.271449				0.715199	-0.252161		1.25758	-0.606703
YFR039C	OSW7	TFIID	TATA-less	0.160348	0.134277	-0.541278		-0.779498		-0.283152	0.168735			0.223191	-0.130937
YFR040W	SAP155	TFIID	TATA-less	0.163709	0.581029	-0.534999	0.821964	-0.779209		-0.245812	0.411017	-0.0129511		0.570095	-0.315698
YFR041C	ERJ5	TFIID	TATA-less	0.0682791	0.526957	-1.64699	-0.624569					-0.191884
YFR042W	KEG1	TFIID	TATA-less	0.0682791	0.526957	-1.64699	-0.624569					-0.191884
YFR043C	IRC6	TFIID		0.0885355	0.306724	-2.07874
YFR044C	DUG1	TFIID	TATA-less	0.188067	0.251001	-1.29039	-0.682569	-1.07141			0.286173	-0.106996		1.04748	-0.218038
YFR045W	YFR045W	TFIID
YFR046C	CNN1	TFIID		0.042308	0.396822	-2.52651	-0.752825					-0.364427
YFR047C	BNA6	TFIID
YFR048W	RMD8	TFIID	TATA-less	0.0234281		-0.903085	-0.734006	-1.04431				-0.278328
YFR049W	YMR31	TFIID	TATA-less	0.145335	0.0954369	-1.83026	-0.972271	-1.11937			-0.977068	-0.164607		0.0318677	-0.925771
YFR050C	PRE4	TFIID	TATA-less	0.172636	0.342427	-0.606625	0.319498	-0.427462		-0.73077	0.497633	-0.0236954		0.616921	-0.490193
YFR051C	RET2	TFIID	TATA-less	0.0348894	-0.0726352	-0.672959	-0.496604					0.00263304
YFR052W	RPN12	TFIID	TATA-less	0.24502	0.204654	-0.472302	0.128603	-0.967126			0.0705931	0.00369582		0.248262	-0.0447601
YFR053C	HXK1	CR	TATA-containing				-0.737643	-0.996386	-1.55307	-1.06879	-0.665896	-0.206647	-0.208641	0.063261	-0.593502
YFR055W	IRC7	TFIID	TATA-containing				-1.23257			-0.565387		-0.141004
YFR057W
YGL001C	ERG26	TFIID	TATA-containing	-0.0221716	-0.240331	-1.00709	-1.00931	-1.12666			-0.475897	-0.312363		0.566442	-0.365077
YGL002W	ERP6	TFIID		0.0460607	0.10536	-1.36693	-0.67242	-1.28739			-0.112399	-0.417285		0.278184	-0.284207
YGL003C	CDH1	TFIID		0.0460607	0.10536	-1.36693	-0.67242	-1.28739			-0.112399	-0.417285		0.278184	-0.284207
YGL004C	RPN14	TFIID	TATA-less	-0.0222968	0.397078	-1.27833	-0.891868	-0.535772			-1.29936	-0.503185		0.0414774	-0.654721
YGL005C	COG7	TFIID	TATA-less	0.0531455	0.359206	-1.53171	-0.754423					-0.275204
YGL006W	PMC1	TFIID	TATA-less				-0.84644	-1.10792	-0.770132	-0.581515	-0.523087	-0.320637	-0.127978	0.0131994	0.232609
YGL006W-A							-0.773389	-1.04008	-0.749561	-0.295606	-0.533582	-0.340211	-0.10789	0.406227	0.128117
YGL007C-A	YGL007C-A	TFIID						-1.05522	-0.188529	-0.142345	-0.312138		-0.113988	0.617407	0.445338
YGL008C	PMA1	CR	TATA-containing						-0.188529	-0.0121125			-0.113988
YGL009C	LEU1	TFIID	TATA-less	-0.115839		-1.26178	-0.780249	-0.692296				-0.360005
YGL010W	MPO1	TFIID	TATA-less	0.23067	0.0767056	-0.747851	-0.20364	-1.30797			0.356648	-0.058766		0.729962	-0.380714
YGL011C	SCL1	TFIID	TATA-less	0.23067	0.0767056	-0.747851	-0.20364	-1.30797			0.356648	-0.058766		0.729962	-0.380714
YGL012W	ERG4	CR	TATA-containing							0.00169498	-0.342859			0.713502	0.31261
YGL013C	PDR1	TFIID	TATA-less	-0.0343339	0.201015	-0.741273	-0.349144	-0.438926		0.308716	0.396165	-0.0970604		0.478114	0.255239
YGL014W	PUF4	TFIID	TATA-less	0.219986	0.861659	-0.691058	0.470059					-0.0357197
YGL015C				0.219986	0.861659		0.470059					-0.0357197
YGL016W	KAP122	TFIID	TATA-less
YGL017W	ATE1	TFIID		0.156951	0.768705	-1.56789	-0.882742					-0.384943
YGL018C	JAC1	TFIID		0.156951	0.768705	-1.56789	-0.882742					-0.384943
YGL019W	CKB1	TFIID		0.0248922	0.562121	-1.91869	-0.485045	-0.770421				-0.416199
YGL020C	GET1	TFIID		0.0248922	0.562121	-1.91869	-0.488897	-0.77558				-0.414873
YGL021W	ALK1	TFIID	TATA-less
YGL022W	STT3	TFIID	TATA-less	-0.249234	0.0795159	-0.924961		-1.39908			0.455996			0.457958	0.102687
YGL023C	PIB2	TFIID	TATA-less	-0.249234	0.0795159	-0.924961		-1.39908			0.455996			0.457958	0.102687
YGL025C	PGD1	TFIID	TATA-less
YGL026C	TRP5	TFIID	TATA-less	-0.120029	0.376463	-0.720621
YGL027C	CWH41	TFIID	TATA-less		0.376604
YGL028C	SCW11	CR	TATA-less						-0.719588	-0.685142	-0.336799		-0.0441149	0.0181247	-0.288601
YGL029W	CGR1	TFIID	TATA-less
YGL030W	RPL30	TFIID	TATA-less				-0.451695	-0.440127		-0.52376	-0.0986591	-0.362387		0.265074	-0.118515
YGL031C	RPL24A	TFIID
YGL032C
YGL033W
YGL035C	MIG1	TFIID	TATA-less				-0.680774		-1.47411	-1.09053	-0.436303	-0.204375	-0.0611483	0.120448	0.0821625
YGL036W	YGL036W	TFIID		0.0936442	-0.176994	-0.555359	-0.336646	-0.811421	-0.816465	-0.727555	-0.142848	-0.208646	-0.133242	0.0203643	-0.0391166
YGL037C	PNC1	CR	TATA-containing				-0.462278	-0.796857	-0.722046	-0.837425	-0.690918	-0.0495027	-0.112872	-0.0304372	-0.110323
YGL038C	OCH1	CR	TATA-less	-0.0525672	-0.604991	-1.35925	-0.963877	-1.0144	-1.02718	-1.07397	-0.639523	-0.239169	-0.341122	0.216105	0.167164
YGL039W	YGL039W	TFIID	TATA-less
YGL040C	HEM2	TFIID	TATA-containing	-0.146747	-0.526848	-1.27071	-0.898165	-0.887551		-1.03899	-0.568154	-0.44143		0.222616	-0.388922
YGL041C-B				0.0596165	0.0103792		-0.881413					-0.578077
YGL041W-A	YGL041W-A	TFIID	TATA-less	0.0799646	0.0120323	-2.11301	-0.927422					-0.534587
YGL043W	DST1	TFIID	TATA-less	-0.0168843	-0.0144377	-0.83985	-0.620206	-0.690264			0.761642	-0.467272		0.856237	-0.273255
YGL044C	RNA15	TFIID	TATA-less	-0.0168843	-0.0144377	-0.83985	-0.618136	-0.684832			0.761642	-0.464803		0.856237	-0.273255
YGL045W	RIM8	TFIID			-0.304765		-0.628619			0.0790801		-0.287314
YGL047W	ALG13	TFIID		-0.0042636	-0.0755284	-0.952488	-0.172882				0.363073	-0.252434		1.32717	-0.137647
YGL048C	RPT6	TFIID	TATA-less	-0.0042636	-0.0755284	-0.952488	-0.105244				0.363073	-0.242768		1.32717	-0.137647
YGL049C	TIF4632	TFIID	TATA-less	0.0894383	0.375391	-1.05355	-0.595291	-0.835465			0.135358	-0.410657		0.615405	-0.770898
YGL050W	TYW3	TFIID	TATA-less	-0.0319997	-0.464066	-1.05135	-0.998162				-0.158017	-0.605642		1.02738	-0.721141
YGL051W
YGL053W				0.110536	-0.304841		-1.31857		-0.519349	-0.446491	-0.2521	-0.554631	-0.192191	-0.165862	-0.711619
YGL054C	ERV14	TFIID		0.0463811	-0.514828	-0.602205	-0.547243	-0.821827	-0.713944	-0.52241	-0.0931487	-0.207918	-0.084372	0.454905	-0.231634
YGL055W	OLE1	CR	TATA-containing	0.137608	-0.692399	-0.624912	-0.60342		-1.00692	-0.612112	-0.881139	-0.322776	-0.294639	-0.367893	0.0166947
YGL056C	SDS23	TFIID	TATA-less					-0.895142		-0.682922
YGL057C	GEP7	TFIID	TATA-less	-0.190044		-1.76647
YGL058W	RAD6	TFIID	TATA-less	-0.00561871	0.0670405	-0.477644	-0.158631	-0.934277		-0.328218	0.0254324	-0.161818		0.436004	-0.212782
YGL059W	PKP2	TFIID		-0.228097	0.0400326	-1.37347
YGL060W	YBP2	TFIID		0.0727324		-1.44165
YGL061C	DUO1	TFIID		0.0728734		-1.4503
YGL062W	PYC1	CR					-0.54563	-0.600648	-0.846199	-0.89122	-0.394366	-0.411102	-0.153655	0.301965	-0.0286914
YGL063W				-0.135764	-0.0181218		-0.903748	-1.00354			-0.0578878	-0.619909		0.558848	-0.423974
YGL064C	MRH4	TFIID	TATA-less	-0.135764	-0.0181218	-0.415584	-0.903748	-1.00724			-0.0578878	-0.619909		0.558848	-0.423974
YGL065C	ALG2	TFIID	TATA-less	0.0163034	0.355056	-0.973921
YGL066W	SGF73	TFIID	TATA-less	0.0774494	0.388436	-0.567116	-0.965751	-1.04213			-0.0519789	-0.325825		0.53528	-0.475879
YGL067W	NPY1	TFIID	TATA-less	0.130933	-0.100446	-2.23335	-0.651743					-0.421233
YGL068W	MNP1	TFIID	TATA-less	0.112548	0.00966978	-1.05395	-0.280337	-1.18757			0.74423	-0.223757		0.695838	0.0748921
YGL070C	RPB9	TFIID	TATA-less	0.112548	0.00966978	-1.05395	-0.280337	-1.18757			0.74423	-0.223757		0.695838	0.0748921
YGL071W	AFT1	TFIID	TATA-less	0.121003	-0.658347	-0.931298	-0.725636	-0.840771	-0.871546	-0.551432	-0.519905	-0.365343	-0.187175	0.115869	0.512733
YGL073W	HSF1	TFIID	TATA-less	-0.0628138	-0.0297641	-0.806936	-0.566203	-0.817036			0.590806	-0.219553		0.83717	0.300136
YGL075C	MPS2	TFIID	TATA-less	-0.0628138		-0.806936		-0.879594			0.071854			0.249949	0.210332
YGL076C	RPL7A	TFIID	TATA-less	0.00379347	-0.846051	-1.22256	-0.587902	-0.811662	-0.857952	-0.855655	-1.24765	-0.356034	-0.448998	-0.323731	-0.507087
YGL077C	HNM1	CR	TATA-containing	-0.216804		-0.32436	-0.549562					-0.294974
YGL078C	DBP3	TFIID	TATA-less
YGL079W	KXD1	TFIID	TATA-less	0.0413527	0.314429	-1.21965	-0.508259					-0.297941
YGL080W	MPC1	TFIID	TATA-less	0.110382	0.370581	-1.853	-1.08766	-0.859741			-0.656596	-0.408822		-0.134118	-0.769553
YGL081W
YGL082W	YGL082W	TFIID	TATA-less	0.0105173	0.139921	-1.63993	-0.501787	-1.03674			0.373338	-0.215217		0.370708	-0.664168
YGL083W	SCY1	TFIID	TATA-less
YGL084C	GUP1	TFIID	TATA-less	0.139421	0.327153	-1.2731	-0.102101	-0.756438				-0.389865
YGL085W	LCL3	TFIID	TATA-containing	-0.0220491		-2.12473
YGL086W	MAD1	TFIID	TATA-less	0.0913343	-0.390134	-0.863978	-1.2457	-1.26388			-0.313377	-0.427105		0.0869316	-0.538519
YGL087C	MMS2	TFIID	TATA-less	0.0913343	-0.390134	-0.863978	-1.2457	-1.26388			-0.313377	-0.427105		0.0869316	-0.538519
YGL089C	MF(ALPHA)2	CR									-0.997912			-1.38878	-1.28612
YGL090W	LIF1	TFIID		0.067166	-0.10739	-1.91653					-0.610917			0.271522	-0.655876
YGL091C	NBP35	TFIID		0.067166	-0.10739	-1.91653					-0.610917			0.271522	-0.655876
YGL092W	NUP145	TFIID	TATA-less
YGL093W	SPC105	TFIID	TATA-less	0.142024	0.57537	-0.826927	-0.584593					-0.292821
YGL094C	PAN2	TFIID	TATA-less	0.142024	0.57537	-0.826927	-0.584593					-0.292821
YGL095C	VPS45	TFIID	TATA-less	-0.0129438	0.0737466	-0.623857		-0.955578			0.0550593			0.280893	-0.266258
YGL096W	TOS8	CR							-0.701267	-0.37332	-0.946355		-0.367664	-0.0323794	0.321625
YGL097W	SRM1	TFIID	TATA-less
YGL098W	USE1	TFIID	TATA-containing
YGL099W	LSG1	TFIID	TATA-less
YGL100W	SEH1	TFIID	TATA-less	0.00646364	0.317207	-1.48676
YGL101W	YGL101W	TFIID	TATA-containing
YGL103W	RPL28	TFIID	TATA-less					-0.63914		-0.246034	-0.222322			0.163006	0.0440948
YGL104C				-0.0615634
YGL105W	ARC1	TFIID	TATA-less	0.0386056	0.121759	-0.765327	-0.598331	-0.783518			0.215848	-0.314882		0.737024	-0.438153
YGL106W	MLC1	TFIID	TATA-less	-0.102298	0.327621	-0.737279	-0.592703	-0.890198			0.349984	-0.204608		0.808257	-0.538891
YGL107C	RMD9	TFIID	TATA-less	-0.102298	0.327621	-0.737279	-0.592703	-0.890198			0.349984	-0.204608		0.808257	-0.538891
YGL108C	YGL108C	TFIID	TATA-containing	-0.0579677	0.20103	-1.57306
YGL110C	CUE3	TFIID	TATA-less	0.0940696	0.0777226	-1.6945	-1.15273	-0.958986				-0.480761
YGL111W	NSA1	TFIID	TATA-less
YGL112C	TAF6	TFIID
YGL113W	SLD3	TFIID	TATA-less
YGL114W	YGL114W	CR	TATA-less	-0.0180434	0.16995	-1.41423		-0.740359			-0.36814			0.460612	-0.0936424
YGL115W	SNF4	TFIID	TATA-less	0.0792993	-0.0757284	-1.21569	-0.364132	-0.850575			-0.130325	-0.276939		0.427581	-0.290018
YGL116W	CDC20	CR	TATA-less
YGL117W	YGL117W	CR	TATA-containing					-0.7506		-0.878462	-0.17746			-0.376217	-0.44032
YGL119W	COQ8	TFIID	TATA-less	-0.0733737	0.177341	-0.876371		-0.994018
YGL120C	PRP43	TFIID	TATA-less	-0.0513636		-0.840333		-0.999506
YGL121C				-0.0940396				-0.94533		0.0718667	-0.124447			0.279504	-0.86613
YGL122C	NAB2	TFIID	TATA-less	0.130637	-0.0689353	-0.499382	0.356185	-0.868675			0.0792455	-0.064218		0.274622	-0.230886
YGL123W	RPS2	TFIID	TATA-containing				-0.493812	-0.948099	-0.857526	-0.772973	-0.186439	-0.367199	-0.0715542	-0.0428135	-0.0594719
YGL124C	MON1	TFIID			-0.100396					-0.684127
YGL125W	MET13	CR					-0.767962	-0.751081	-0.828677	-0.578763	-0.608879	-0.423977	-0.251271	-0.0988197	0.50419
YGL126W				0.166993	0.179134		-0.433839	-0.836652		-0.261395	0.431031	-0.191679		-0.0839704	-0.0094173
YGL127C	SOH1	TFIID	TATA-less	0.167998	0.179134	-0.847262	-0.434035	-0.836652		-0.261395	0.431031	-0.189558		-0.0839704	-0.0094173
YGL128C	CWC23	TFIID		0.0718431	-0.249592	-2.4292	-0.8178					-0.548997
YGL129C	RSM23	TFIID	TATA-containing	0.0585682	0.31366	-0.968432	-0.650149	-1.2038			0.406195	-0.166265		0.968706	-0.801882
YGL130W	CEG1	TFIID	TATA-less	0.124565	0.397616	-1.45561	-0.732984					-0.372808
YGL131C	SNT2	TFIID	TATA-containing	0.124565	0.397616	-1.45561	-0.713198					-0.367347
YGL133W	ITC1	TFIID	TATA-less	0.0342086	0.0337959	-1.43439	-0.903208					-0.44457
YGL134W	PCL10	TFIID	TATA-less
YGL135W	RPL1B	TFIID	TATA-less					-0.803751			-0.193178			0.385132	-0.0287653
YGL136C	MRM2	TFIID	TATA-less	0.00967744	-0.27437	-2.08091	-0.59633					-0.434234
YGL137W	SEC27	TFIID	TATA-less	-0.00550793	0.390989	-0.727699	-0.273655					-0.216195
YGL138C				-0.00550793	0.390989		-0.273655					-0.216195
YGL139W	FLC3	TFIID	TATA-less	0.172059	0.131619	-1.22793	-0.202907	-0.772428			0.565658	-0.226389		0.590134	-0.36312
YGL140C	YGL140C	TFIID	TATA-less	0.172059	0.131619	-1.22793	-0.202907	-0.772428			0.565658	-0.226389		0.590134	-0.36312
YGL141W	HUL5	TFIID		0.126415	0.479642	-1.84265	-0.633993	-0.874219				-0.225301
YGL142C	GPI10	TFIID		0.126415	0.479642	-1.84265	-0.633993	-0.877208				-0.225301
YGL143C	MRF1	TFIID	TATA-less	0.111846	0.41939	-2.2822	-0.83708					-0.332587
YGL144C	ROG1	TFIID	TATA-less	0.134447	0.503394	-1.57972
YGL145W	TIP20	TFIID	TATA-containing
YGL146C				-0.129168	-0.329904		-0.840485					-0.449526
YGL147C	RPL9A	TFIID						-0.705217			-0.14967			0.270298	0.169803
YGL148W	ARO2	TFIID	TATA-less	-0.007032	0.0313538	-1.00669	-0.201661	-0.574962			0.26833	-0.408899		0.550797	-0.0232036
YGL150C	INO80	TFIID	TATA-less		0.0525397			-0.700327			0.0054094			0.312753	-0.0223141
YGL151W	NUT1	TFIID	TATA-less	0.151933	0.272629	-0.79056	-0.328681	-0.665309				-0.327989
YGL153W	PEX14	TFIID		-0.0628767	0.485796	-1.53323
YGL154C	LYS5	TFIID	TATA-less	-0.0628767	0.485866	-1.53323
YGL155W	CDC43	TFIID		0.0185408	0.776821	-1.73925
YGL156W											-0.648831			-0.0942147	-0.879112
YGL157W	ARI1	CR	TATA-containing								-0.126828			1.19635	-0.647115
YGL158W										-0.78747
YGL159W	YGL159W	TFIID	TATA-less	-0.0610658	0.24591	-1.74232
YGL160W	AIM14	TFIID		0.0802023	0.105209	-1.104	-0.81136	-1.28199		-0.776116	0.0118626	-0.326466		0.386329	-0.594081
YGL161C	YIP5	TFIID	TATA-less	0.0802023	0.105209	-1.104	-0.862086	-1.28225		-0.773512	0.0118626	-0.33762		0.386329	-0.594081
YGL162W	SUT1	TFIID	TATA-containing	-0.0804676	-0.0515313	-0.5806	-0.830647	-1.22671	-1.01107	-0.74777	-0.591631	-0.30487	-0.18446	0.666789	-0.108924
YGL163C	RAD54	TFIID	TATA-less	0.00544219	0.551588	-0.333675		-0.902303			-0.0509388			0.618411	-0.525028
YGL164C	YRB30	TFIID	TATA-less	-0.0117439	0.253227	-1.75379
YGL166W	CUP2	TFIID	TATA-less	0.085934	-0.730045	-0.691993		-1.17136	-0.710242	-0.772054	-0.265536		-0.154546	-0.0172782	-0.118008
YGL167C	PMR1	TFIID	TATA-less	0.085934	-0.747158	-0.691993	-0.66466	-1.17136	-0.710242	-0.772054	-0.265536	-0.200761	-0.154546	-0.0172782	-0.118008
YGL168W
YGL169W	SUA5	TFIID	TATA-less
YGL170C
YGL171W	ROK1	TFIID	TATA-less
YGL172W	NUP49	TFIID	TATA-less	0.291315	0.413648	-0.658372	-0.546608	-1.12717		-0.690943	0.358137	-0.156513		0.722834	-0.306942
YGL173C	XRN1	TFIID	TATA-less	0.291315	0.413648	-0.658372	-0.546608	-1.12717		-0.690943	0.358137	-0.156513		0.722834	-0.306942
YGL174W	BUD13	TFIID		-0.199136	0.437709	-1.39323
YGL175C	SAE2	TFIID		-0.199136	0.437709	-1.39323
YGL176C	YGL176C	TFIID	TATA-less	-0.0408762	0.48484	-1.39045
YGL178W	MPT5	TFIID	TATA-less	-0.0102913		-0.560915	-0.772499	-1.14078	-0.773225	-0.473001	-0.524158	-0.263517	-0.124347	-0.201044	-0.217839
YGL179C				-0.193753			-1.06942	-0.90498	-0.494878	-0.628251	-0.732331	-0.494583	-0.295544	0.0658438	-0.283734
YGL180W	ATG1	TFIID									-0.233345			0.0785989	0.0188941
YGL181W	GTS1	TFIID	TATA-less	0.0404198	0.0926099	-0.374765	-0.66423	-1.078		-0.644655	-0.13043	-0.312203		-0.146118	-0.0939485
YGL183C					0.0926099					-0.642329
YGL184C	STR3	CR							-0.770308	-1.26735	-1.16375		-0.471317	-0.59767	0.750414
YGL185C	YGL185C	TFIID	TATA-less	-0.0405555	0.0425081	-2.49442
YGL186C	TPN1	TFIID	TATA-containing	0.0207788	0.215569	-1.28193	-1.01341	-1.33535		-0.814731	-0.714081	-0.45138		-0.234492	-0.428909
YGL187C	COX4	TFIID	TATA-less	0.0609731	-0.631222	-1.14564	-0.50174	-0.572184			-0.170239	-0.0395247		1.46399	-0.307611
YGL188C-A	YGL188C-A	TFIID					-0.351341	-0.90662		-0.420832	-0.011239	-0.476324		0.160712	-0.00306904
YGL189C	RPS26A	TFIID	TATA-less
YGL190C	CDC55	TFIID		0.153522	-0.587061	-0.862072	-0.911659	-1.07402	-0.565197	-0.501035	-0.119649	-0.144535	0.00966167	0.448553	0.0665609
YGL191W	COX13	TFIID	TATA-less	0.182186	-0.133579	-1.17488	-0.755795	-0.871215		-0.530491	-0.08807	-0.0904801		0.343289	-0.2459
YGL192W								-0.799312			-0.217138			0.572851	-0.759755
YGL193C
[truncated: 3,889 more rows]

## Sheet: 4D
gene_id	class	Taf1
YAL001C	TFIID	-0.964748
YAL002W	TFIID	-0.593295
YAL003W	CR	0.104458
YAL005C	CR	0.770641
YAL008W	TFIID	-0.516159
YAL009W	TFIID	-0.908026
YAL010C	TFIID	-1.15685
YAL012W	CR	-0.0899417
YAL013W	TFIID	-0.709986
YAL014C	TFIID	-0.644359
YAL017W	TFIID	-0.827031
YAL023C	TFIID	-1.28116
YAL029C	TFIID	-0.539688
YAL030W	TFIID	-1.59692
YAL031C	TFIID	-1.4585
YAL033W	TFIID	-1.10726
YAL034C	TFIID	-0.0520919
YAL038W	CR	0.0109936
YAL039C	TFIID	0.029328
YAL040C	CR	0.194687
YAL041W	TFIID	-1.41795
YAL042W	TFIID	-1.7291
YAL043C	TFIID	-0.992185
YAL044C	TFIID	-0.453836
YAL044W-A	TFIID	-0.636805
YAL046C	TFIID	-0.6717
YAL047C	TFIID	-0.697018
YAL051W	TFIID	-0.535993
YAL053W	TFIID	-0.787782
YAL060W	CR	-0.862936
YAR002C-A	TFIID	-1.02839
YAR002W	TFIID	-0.853453
YAR003W	TFIID	-0.825085
YAR027W	TFIID	-0.663735
YAR042W	TFIID	-1.38839
YBL003C	CR	-0.175089
YBL004W	TFIID	-0.908064
YBL005W	TFIID	-0.311595
YBL007C	TFIID	-1.45455
YBL011W	TFIID	-0.618777
YBL013W	TFIID	-0.0630799
YBL014C	TFIID	-0.677541
YBL017C	TFIID	-0.661949
YBL018C	TFIID	-1.06523
YBL019W	TFIID	-0.636321
YBL020W	TFIID	-0.706459
YBL021C	TFIID	-0.492805
YBL022C	TFIID	-1.76933
YBL024W	TFIID	-0.296184
YBL025W	TFIID	-0.68964
YBL026W	TFIID	-1.08095
YBL027W	TFIID	-0.512627
YBL030C	CR	0.222685
YBL034C	TFIID	0.0207936
YBL038W	TFIID	-1.09803
YBL040C	TFIID	-1.15128
YBL041W	TFIID	-1.1489
YBL045C	TFIID	-0.382631
YBL046W	TFIID	-0.928256
YBL047C	TFIID	-1.55828
YBL050W	TFIID	-0.838405
YBL051C	TFIID	-1.37082
YBL056W	TFIID	-1.30711
YBL057C	TFIID	-1.34372
YBL058W	TFIID	-0.975174
YBL059C-A	TFIID	-0.788794
YBL059W	TFIID	-0.756565
YBL064C	CR	-0.245908
YBL067C	TFIID	-0.248646
YBL076C	TFIID	-1.46926
YBL078C	TFIID	-0.362055
YBL079W	TFIID	-1.44947
YBL080C	TFIID	-1.35897
YBL085W	TFIID	-0.75328
YBL086C	TFIID	-0.485869
YBL087C	TFIID	-0.432482
YBL088C	TFIID	-0.187122
YBL089W	TFIID	-0.940544
YBL090W	TFIID	-1.14032
YBL091C	TFIID	-0.988535
YBL091C-A	TFIID	-0.544752
YBL092W	TFIID	-0.59585
YBL093C	TFIID	-1.05943
YBL099W	TFIID	-0.0844185
YBL102W	TFIID	-1.39952
YBL103C	TFIID	-1.29223
YBL105C	TFIID	-1.52176
YBL107C	TFIID	-0.62222
YBR001C	CR	-0.211372
YBR002C	TFIID	-1.11291
YBR003W	TFIID	-0.908576
YBR009C	CR	-0.0509614
YBR011C	TFIID	-0.929825
YBR015C	TFIID	-0.762422
YBR017C	TFIID	-0.924661
YBR022W	TFIID	-0.447656
YBR025C	TFIID	-1.17777
YBR034C	TFIID	-0.345406
YBR036C	TFIID	-1.37647
YBR037C	TFIID	-1.18383
YBR039W	TFIID	-0.995723
YBR041W	TFIID	-0.278446
YBR044C	TFIID	-0.676099
YBR046C	CR	-0.329058
YBR047W	TFIID	0.220252
YBR048W	CR	-0.682458
YBR049C	TFIID	-1.36401
YBR052C	TFIID	0.0320314
YBR053C	TFIID	-0.564712
YBR056W	TFIID	-0.859827
YBR056W-A	CR	-0.467778
YBR058C-A	TFIID	-1.28265
YBR059C	TFIID	-0.97952
YBR060C	TFIID	-1.23321
YBR066C	CR	-0.434639
YBR069C	CR	0.0420462
YBR070C	TFIID	-0.43303
YBR071W	CR	0.204859
YBR073W	TFIID	-0.242476
YBR077C	TFIID	-0.732546
YBR078W	CR	-0.115357
YBR080C	TFIID	-0.889315
YBR082C	TFIID	-0.530915
YBR084C-A	TFIID	-0.650124
YBR085C-A	CR	0.0954177
YBR086C	TFIID	-0.896704
YBR089C-A	TFIID	-0.19415
YBR095C	TFIID	-1.20221
YBR096W	TFIID	-1.10298
YBR101C	TFIID	-0.30054
YBR102C	TFIID	-0.830038
YBR103W	TFIID	-0.710194
YBR105C	TFIID	-0.0223331
YBR106W	TFIID	-0.847445
YBR107C	TFIID	-0.734112
YBR108W	TFIID	-0.33902
YBR109C	TFIID	-1.20367
YBR110W	TFIID	-0.782338
YBR111C	TFIID	-0.835116
YBR111W-A	TFIID	-1.00744
YBR112C	TFIID	-0.0268023
YBR114W	TFIID	0.125888
YBR118W	CR	-0.37757
YBR119W	TFIID	0.0119818
YBR120C	TFIID	-0.925166
YBR121C	TFIID	-0.888641
YBR125C	TFIID	-0.967187
YBR126C	CR	-1.08838
YBR127C	TFIID	-1.31641
YBR129C	TFIID	-0.923045
YBR130C	TFIID	-1.38099
YBR131W	TFIID	-0.87489
YBR132C	CR	0.302223
YBR133C	TFIID	-1.1414
YBR137W	TFIID	-0.348282
YBR138C	TFIID	-0.32525
YBR139W	CR	-0.218555
YBR140C	TFIID	-0.0679786
YBR143C	TFIID	-1.69241
YBR146W	TFIID	-1.6135
YBR149W	CR	-0.554781
YBR151W	TFIID	-0.682828
YBR152W	TFIID	-0.765774
YBR158W	CR	0.226055
YBR159W	TFIID	-0.739583
YBR162C	CR	0.079859
YBR163W	TFIID	-1.06706
YBR164C	TFIID	-1.34415
YBR165W	TFIID	-1.1165
YBR166C	TFIID	-1.07237
YBR167C	TFIID	-0.3244
YBR168W	TFIID	-0.61827
YBR169C	TFIID	-0.724301
YBR170C	TFIID	-1.15836
YBR171W	TFIID	-0.713767
YBR181C	TFIID	-1.03554
YBR185C	TFIID	-0.672036
YBR187W	TFIID	-0.454832
YBR189W	TFIID	-0.67004
YBR191W	TFIID	-0.892866
YBR193C	TFIID	-0.812567
YBR194W	TFIID	-0.599114
YBR196C	CR	0.254633
YBR198C	TFIID	-0.971627
YBR199W	TFIID	-0.889677
YBR204C	TFIID	-0.807866
YBR205W	TFIID	-1.21658
YBR207W	TFIID	-1.51694
YBR208C	TFIID	-0.18651
YBR210W	TFIID	-0.57781
YBR211C	TFIID	-1.02248
YBR212W	TFIID	-1.27341
YBR214W	TFIID	-0.759375
YBR215W	TFIID	-0.992948
YBR216C	TFIID	-0.860321
YBR217W	TFIID	-0.518913
YBR218C	CR	-0.329421
YBR221C	TFIID	-0.594415
YBR222C	TFIID	-0.324848
YBR223C	TFIID	-0.669022
YBR225W	TFIID	-0.688713
YBR227C	TFIID	-0.380515
YBR228W	TFIID	-0.487212
YBR229C	TFIID	-1.27407
YBR230C	CR	0.102335
YBR234C	TFIID	-0.951601
YBR235W	TFIID	-1.51359
YBR238C	TFIID	-0.232397
YBR249C	CR	-0.973549
YBR251W	TFIID	-0.950303
YBR253W	TFIID	-0.929989
YBR255C-A	TFIID	-1.24812
YBR256C	CR	-0.668539
YBR260C	TFIID	-0.306106
YBR262C	TFIID	-1.28918
YBR263W	TFIID	-1.10471
YBR264C	TFIID	-0.733237
YBR265W	TFIID	-1.25783
YBR269C	TFIID	-0.645513
YBR273C	TFIID	-0.968538
YBR274W	TFIID	-0.722723
YBR276C	TFIID	-0.788721
YBR278W	TFIID	-0.99638
YBR279W	TFIID	-1.23743
YBR282W	TFIID	-0.75497
YBR283C	TFIID	-1.20311
YBR286W	CR	-0.80698
YBR287W	TFIID	-0.908829
YBR290W	TFIID	-1.15993
YCL001W	TFIID	-0.959819
YCL002C	TFIID	-0.148608
YCL005W	TFIID	-0.798806
YCL005W-A	TFIID	-1.17463
YCL008C	TFIID	-0.957486
YCL010C	TFIID	-1.06591
YCL011C	TFIID	-1.01927
YCL025C	CR	0.173581
YCL026C-B	CR	-0.144289
YCL030C	CR	-0.491663
YCL034W	TFIID	-1.54568
YCL035C	TFIID	-0.668997
YCL039W	TFIID	-0.779087
YCL043C	CR	-1.03966
YCL044C	TFIID	-1.66252
YCL045C	TFIID	-0.821257
YCL050C	TFIID	-1.02439
YCL051W	TFIID	-1.13681
YCL052C	TFIID	-0.65873
YCL057C-A	TFIID	-1.19508
YCL057W	TFIID	-0.695856
YCR002C	TFIID	-1.09922
YCR003W	TFIID	-1.24518
YCR004C	TFIID	-0.666136
YCR008W	TFIID	-0.0946705
YCR009C	TFIID	-1.07767
YCR011C	TFIID	-0.479951
YCR012W	CR	0.502701
YCR017C	TFIID	-0.630442
YCR019W	TFIID	-0.516382
YCR020C-A	TFIID	-0.632328
YCR020W-B	TFIID	-1.06317
YCR021C	CR	-0.308391
YCR024C-A	CR	-0.291855
YCR027C	TFIID	-0.771933
YCR028C	TFIID	-1.44294
YCR030C	TFIID	-0.790744
YCR031C	TFIID	-0.612329
YCR033W	TFIID	-0.990703
YCR035C	TFIID	-0.891091
YCR036W	TFIID	-0.597735
YCR037C	TFIID	-0.0865799
YCR053W	TFIID	-1.10116
YCR063W	TFIID	-0.982244
YCR068W	TFIID	-0.822768
YCR069W	TFIID	-0.449225
YCR071C	TFIID	-0.850945
YCR077C	TFIID	-1.63837
YCR079W	TFIID	-1.28791
YCR082W	TFIID	-0.897844
YCR083W	TFIID	-0.355102
YCR084C	TFIID	-1.30844
YCR086W	TFIID	-0.29136
YCR091W	TFIID	-0.0131356
YCR093W	TFIID	-1.8105
YDL001W	TFIID	-0.524046
YDL002C	TFIID	-0.61276
YDL004W	TFIID	-1.32689
YDL005C	TFIID	-0.799761
YDL006W	TFIID	-1.20471
YDL007W	TFIID	-1.29678
YDL010W	TFIID	-0.509812
YDL012C	TFIID	-0.815156
YDL014W	TFIID	-1.56436
YDL015C	TFIID	-1.21185
YDL017W	TFIID	-0.465586
YDL019C	TFIID	-0.376354
YDL020C	CR	0.328574
YDL025C	CR	-0.706242
YDL027C	TFIID	-0.976128
YDL029W	CR	-1.25383
YDL035C	TFIID	-0.450484
YDL040C	TFIID	-0.873393
YDL044C	TFIID	-0.33684
YDL045W-A	TFIID	-0.535569
YDL046W	TFIID	-0.977203
YDL047W	TFIID	-0.864837
YDL051W	TFIID	-0.772178
YDL052C	TFIID	-1.15028
YDL053C	TFIID	-0.537479
YDL054C	TFIID	-0.681678
YDL055C	CR	0.42549
YDL056W	TFIID	-0.517668
YDL058W	TFIID	-0.699354
YDL061C	TFIID	-0.922361
YDL064W	TFIID	-0.549271
YDL065C	TFIID	-0.31772
YDL066W	CR	-0.323107
YDL067C	TFIID	-0.317473
YDL072C	TFIID	-0.466761
YDL073W	TFIID	-0.948124
YDL074C	TFIID	-1.33346
YDL075W	TFIID	-0.464834
YDL076C	TFIID	-0.289183
YDL077C	TFIID	-0.447569
YDL078C	TFIID	-0.582816
YDL080C	TFIID	-0.731318
YDL081C	TFIID	-0.797998
YDL082W	TFIID	-1.24353
YDL084W	TFIID	-1.60477
YDL086W	TFIID	-0.588274
YDL087C	TFIID	-0.556627
YDL088C	TFIID	-0.614301
YDL089W	TFIID	-0.640352
YDL090C	TFIID	-0.703987
YDL091C	TFIID	-0.352033
YDL092W	TFIID	-1.45456
YDL095W	TFIID	-1.02849
YDL097C	TFIID	-1.1549
YDL105W	TFIID	-0.705743
YDL106C	TFIID	-1.18972
YDL110C	CR	0.0352502
YDL111C	TFIID	-0.76103
YDL112W	TFIID	-1.14087
YDL113C	TFIID	-1.0468
YDL115C	TFIID	-0.946689
YDL116W	TFIID	-1.17135
YDL117W	CR	-0.257787
YDL119C	TFIID	-0.431688
YDL120W	TFIID	-1.06674
YDL121C	TFIID	-1.31345
YDL122W	TFIID	-0.132944
YDL125C	CR	-0.857285
YDL126C	TFIID	-1.32078
YDL127W	CR	0.284538
YDL128W	TFIID	-0.651612
YDL130W	TFIID	-0.528643
YDL130W-A	TFIID	-0.222631
YDL132W	TFIID	-0.899207
YDL133C-A	TFIID	-0.0969904
YDL134C	TFIID	-0.968585
YDL137W	TFIID	-1.08349
YDL140C	TFIID	-1.2394
YDL143W	TFIID	-1.31103
YDL145C	TFIID	-1.43988
YDL146W	TFIID	-0.460002
YDL147W	TFIID	-1.38122
YDL148C	TFIID	-1.04488
YDL155W	TFIID	-0.981681
YDL159W	TFIID	-1.10048
YDL160C	TFIID	-1.13149
YDL171C	TFIID	-0.703488
YDL173W	TFIID	-1.78247
YDL174C	TFIID	-0.672805
YDL175C	TFIID	-1.26351
YDL176W	TFIID	-0.550782
YDL177C	TFIID	-0.838012
YDL178W	TFIID	-0.504723
YDL180W	CR	-0.293633
YDL181W	TFIID	-0.706229
YDL182W	CR	0.032824
YDL184C	TFIID	-0.118599
YDL185W	TFIID	-1.15244
YDL188C	TFIID	-0.986405
YDL189W	TFIID	-1.24539
YDL190C	TFIID	-0.872752
YDL191W	TFIID	-0.346966
YDL192W	TFIID	-1.31367
YDL193W	TFIID	-1.21674
YDL195W	TFIID	-1.5563
YDL197C	TFIID	-0.537723
YDL203C	TFIID	-1.44011
YDL205C	CR	-0.765101
YDL206W	TFIID	-0.600005
YDL207W	TFIID	-0.733368
YDL208W	TFIID	-1.9127
YDL209C	TFIID	-1.23587
YDL212W	TFIID	-0.926523
YDL215C	TFIID	-1.18545
YDL217C	TFIID	-1.11378
YDL225W	TFIID	-1.20626
YDL226C	TFIID	-0.985633
YDL229W	TFIID	-0.777571
YDL231C	TFIID	-1.08462
YDL232W	TFIID	-1.52462
YDL233W	TFIID	-0.745836
YDL234C	TFIID	-0.589616
YDL235C	TFIID	-1.5919
YDL236W	TFIID	-0.899353
YDL237W	TFIID	-1.20902
YDL238C	TFIID	-0.508632
YDL240W	TFIID	-1.19076
YDR001C	CR	-0.283805
YDR003W	TFIID	-0.426612
YDR005C	TFIID	-0.723805
YDR006C	TFIID	-0.8681
YDR012W	TFIID	-1.59648
YDR017C	TFIID	-0.546655
YDR023W	TFIID	-0.844462
YDR025W	TFIID	-0.792283
YDR027C	TFIID	-0.326434
YDR028C	TFIID	-1.02499
YDR030C	TFIID	-0.297371
YDR031W	TFIID	-0.451192
YDR032C	CR	-0.943793
YDR035W	TFIID	-0.732291
YDR036C	TFIID	-0.617335
YDR041W	TFIID	-0.838773
YDR043C	CR	0.16432
YDR046C	CR	0.0408978
YDR047W	TFIID	-0.244445
YDR050C	CR	0.527428
YDR054C	TFIID	-0.299429
YDR055W	CR	0.0578449
YDR056C	TFIID	-0.38051
YDR057W	TFIID	-0.753247
YDR059C	TFIID	-0.2058
YDR061W	TFIID	-0.771661
YDR062W	TFIID	-1.16038
YDR063W	TFIID	-0.246326
YDR064W	TFIID	-0.45977
YDR067C	TFIID	-0.463944
YDR068W	TFIID	-0.514236
YDR069C	CR	-0.108286
YDR071C	TFIID	-0.751294
YDR072C	CR	-0.212655
YDR073W	CR	-0.136327
YDR078C	TFIID	-0.602471
YDR079C-A	TFIID	-0.852911
YDR079W	TFIID	-0.13449
YDR080W	TFIID	-0.576029
YDR084C	TFIID	-0.351021
YDR086C	TFIID	-1.19884
YDR088C	TFIID	-0.24189
YDR089W	CR	-1.02351
YDR090C	TFIID	-0.864165
YDR092W	TFIID	-0.726317
YDR096W	TFIID	-0.367509
YDR099W	TFIID	-0.861172
YDR100W	TFIID	-0.913666
YDR105C	TFIID	-0.771322
YDR111C	TFIID	0.00815536
YDR113C	TFIID	-1.50043
YDR115W	TFIID	-1.06362
YDR116C	TFIID	-0.938935
YDR117C	TFIID	-1.34813
YDR118W	TFIID	-0.849754
YDR122W	TFIID	-0.483051
YDR127W	CR	-1.07891
YDR129C	TFIID	-0.429832
YDR130C	TFIID	-1.25025
YDR132C	CR	0.138279
YDR135C	CR	-0.648277
YDR138W	TFIID	-1.20704
YDR139C	TFIID	-1.0896
YDR140W	TFIID	-0.821187
YDR141C	TFIID	-0.565954
YDR142C	TFIID	-0.528628
YDR143C	TFIID	-0.948764
YDR144C	TFIID	-0.957874
YDR148C	TFIID	-0.785926
YDR150W	TFIID	-1.46137
YDR151C	TFIID	-1.10155
YDR153C	TFIID	0.158362
YDR155C	CR	0.387599
YDR158W	CR	-0.439866
YDR164C	TFIID	-0.558488
YDR166C	TFIID	-0.743811
YDR167W	TFIID	-0.643658
YDR168W	TFIID	-1.21355
YDR169C	TFIID	-0.818699
YDR170C	TFIID	-0.817365
YDR171W	CR	0.0202671
YDR172W	TFIID	-1.23777
YDR173C	CR	-1.18294
YDR174W	TFIID	-1.29912
YDR175C	TFIID	-0.940661
YDR176W	TFIID	-1.75807
YDR177W	TFIID	-1.60455
YDR178W	TFIID	-0.216462
YDR181C	TFIID	-0.296906
YDR182W	TFIID	-0.807008
YDR183W	TFIID	-0.829168
YDR186C	TFIID	-0.499698
YDR188W	TFIID	-1.39651
YDR190C	TFIID	-1.2132
YDR191W	TFIID	-0.537419
YDR194C	TFIID	-1.11144
YDR195W	CR	-1.43088
YDR196C	TFIID	-0.953237
YDR197W	TFIID	-1.27474
YDR200C	TFIID	-1.38646
YDR201W	TFIID	-0.744003
YDR202C	TFIID	-0.618714
YDR204W	TFIID	-0.309348
YDR205W	TFIID	-0.911362
YDR206W	TFIID	-1.24332
YDR207C	TFIID	-1.08929
YDR208W	TFIID	-0.907337
YDR211W	TFIID	-0.419242
YDR214W	CR	-0.301418
YDR216W	TFIID	-0.552967
YDR219C	TFIID	-0.727101
YDR221W	TFIID	-1.01277
YDR222W	CR	-0.151081
YDR224C	CR	-0.328241
YDR226W	CR	0.110116
YDR228C	TFIID	-1.30562
YDR229W	TFIID	-0.472828
YDR231C	TFIID	-0.218012
YDR232W	TFIID	-0.43407
YDR233C	TFIID	-0.561796
YDR234W	TFIID	-1.28055
YDR235W	TFIID	-0.530353
YDR236C	TFIID	-0.800079
YDR238C	TFIID	-0.805453
YDR240C	TFIID	-0.628476
YDR242W	TFIID	-0.325751
YDR243C	TFIID	-0.581708
YDR244W	TFIID	-0.664266
YDR245W	TFIID	-0.767899
YDR246W	TFIID	-0.909177
YDR247W	CR	0.338893
YDR249C	TFIID	-0.619808
YDR251W	TFIID	-0.935287
YDR254W	TFIID	-0.502196
YDR255C	TFIID	-0.579282
YDR257C	TFIID	-0.86851
YDR260C	TFIID	-0.863208
YDR262W	TFIID	-0.808351
YDR264C	TFIID	-0.662866
YDR265W	TFIID	-1.33493
YDR267C	TFIID	-0.30553
YDR268W	TFIID	-0.581759
YDR270W	CR	-0.321455
YDR275W	CR	-0.0979061
YDR276C	CR	-0.245892
YDR280W	TFIID	-0.862205
YDR283C	TFIID	-0.675199
YDR284C	TFIID	-0.751041
YDR285W	TFIID	-0.474205
YDR286C	TFIID	-0.355079
YDR287W	TFIID	-0.642785
YDR288W	TFIID	-1.00082
YDR289C	TFIID	-0.398296
YDR291W	TFIID	-0.342143
YDR295C	TFIID	-1.20697
YDR296W	TFIID	-0.629485
YDR297W	TFIID	-0.0978733
YDR301W	TFIID	-1.5746
YDR303C	TFIID	-1.75488
YDR304C	TFIID	-0.623119
YDR305C	TFIID	-0.744686
YDR306C	TFIID	-0.57272
YDR307W	TFIID	-0.390986
YDR310C	TFIID	-0.901405
YDR311W	TFIID	-1.21652
YDR313C	TFIID	-0.230337
YDR314C	TFIID	-0.827915
YDR318W	TFIID	-1.07203
YDR319C	TFIID	-0.609227
YDR320C	TFIID	-0.948503
YDR320C-A	TFIID	-1.03489
YDR321W	TFIID	-1.45289
YDR322C-A	TFIID	-0.614052
YDR326C	TFIID	-0.739537
YDR328C	TFIID	-1.25082
YDR329C	TFIID	-0.821653
YDR330W	TFIID	-0.976665
YDR331W	TFIID	-1.12808
YDR334W	TFIID	-0.730255
YDR335W	TFIID	-1.17022
YDR337W	TFIID	-0.535981
YDR338C	TFIID	-1.10828
YDR346C	TFIID	-1.34665
YDR347W	TFIID	-1.19192
YDR348C	TFIID	-1.1129
YDR350C	TFIID	-0.901591
YDR351W	TFIID	-0.772904
YDR352W	TFIID	-1.04768
YDR353W	CR	-0.692474
YDR354W	TFIID	-0.868073
YDR358W	TFIID	-1.17412
YDR361C	TFIID	-0.907136
YDR362C	TFIID	-0.778676
YDR363W	TFIID	-0.852045
YDR363W-A	TFIID	-1.38523
YDR368W	TFIID	-0.976102
YDR370C	TFIID	-0.702774
YDR371W	TFIID	-0.912848
YDR372C	TFIID	-1.78969
YDR373W	TFIID	-0.68253
YDR375C	TFIID	-0.898595
YDR376W	TFIID	-0.668763
YDR377W	TFIID	-0.663126
YDR378C	TFIID	-1.50939
YDR381W	CR	0.535215
YDR382W	TFIID	-1.14684
YDR385W	TFIID	-0.671
YDR387C	TFIID	-1.5213
YDR388W	TFIID	-1.18054
YDR389W	TFIID	-0.833601
YDR394W	TFIID	-1.37408
YDR399W	CR	-0.705959
YDR404C	TFIID	-0.956894
YDR405W	TFIID	-1.1047
YDR406W	CR	0.184797
YDR407C	TFIID	-1.10601
YDR408C	TFIID	-1.15524
YDR409W	TFIID	-1.01414
YDR410C	TFIID	-1.26636
YDR411C	TFIID	-0.8221
YDR412W	TFIID	-0.824094
YDR414C	TFIID	-0.167139
YDR415C	TFIID	-0.640599
YDR416W	TFIID	-0.0191164
YDR418W	TFIID	-1.03978
YDR420W	TFIID	-0.929191
YDR422C	TFIID	-0.918845
YDR423C	TFIID	-0.840399
YDR427W	TFIID	-1.55252
YDR430C	TFIID	-1.10623
YDR432W	TFIID	-0.794144
YDR435C	TFIID	-0.616433
YDR437W	TFIID	-0.613525
YDR439W	TFIID	-0.18964
YDR441C	TFIID	-0.177813
YDR448W	TFIID	-1.06848
YDR450W	TFIID	-0.749963
YDR452W	TFIID	-0.625558
YDR456W	TFIID	-0.849865
YDR458C	TFIID	-0.880881
YDR459C	TFIID	-0.339282
YDR460W	TFIID	-0.573755
YDR463W	TFIID	-1.17116
YDR468C	TFIID	-0.0926081
YDR469W	TFIID	-0.754736
YDR470C	TFIID	-0.503718
YDR472W	TFIID	-0.243071
YDR475C	TFIID	-0.431378
YDR476C	TFIID	-0.598326
YDR477W	TFIID	-1.48009
YDR479C	TFIID	-0.624151
YDR480W	TFIID	-0.389203
YDR481C	TFIID	-0.341373
YDR483W	TFIID	-0.734298
YDR484W	TFIID	-0.247568
YDR485C	TFIID	-0.692002
YDR486C	TFIID	0.0262353
YDR487C	CR	-0.378942
YDR488C	TFIID	-0.662112
YDR489W	TFIID	-0.57559
YDR492W	CR	-0.0366971
YDR493W	TFIID	-0.446219
YDR494W	TFIID	-0.99094
YDR498C	TFIID	-0.632683
YDR500C	TFIID	-0.722447
YDR502C	CR	-0.253754
YDR503C	TFIID	-0.82411
YDR505C	TFIID	-0.358407
YDR506C	TFIID	-0.171064
YDR508C	CR	0.13991
YDR510W	TFIID	-0.869655
YDR511W	TFIID	-0.344076
YDR512C	TFIID	-0.582936
YDR513W	CR	-0.139413
YDR516C	TFIID	-0.60289
YDR519W	TFIID	-0.698914
YDR524C	TFIID	-0.620089
YDR525W-A	TFIID	-0.709198
YDR527W	TFIID	0.254175
YDR529C	TFIID	-0.241421
YDR531W	TFIID	-0.84112
YDR532C	TFIID	-0.887863
YEL002C	TFIID	-0.769633
YEL003W	TFIID	-1.18498
YEL004W	TFIID	-0.880659
YEL005C	TFIID	-0.724078
YEL006W	TFIID	-0.345873
YEL007W	CR	-0.139139
YEL009C	CR	0.166491
YEL012W	TFIID	-0.221739
YEL013W	TFIID	-1.00121
YEL015W	TFIID	-0.995867
YEL016C	TFIID	-1.21923
YEL017C-A	CR	-0.414495
YEL017W	TFIID	-0.954147
YEL024W	TFIID	-0.172917
YEL025C	TFIID	-0.652662
YEL026W	TFIID	-0.959373
YEL027W	TFIID	-0.752784
YEL031W	TFIID	-1.10333
YEL034W	CR	-0.0137029
YEL036C	TFIID	-0.601071
YEL037C	TFIID	-1.12032
YEL042W	TFIID	-0.468649
YEL043W	TFIID	-0.634109
YEL046C	CR	-0.0227307
YEL050C	TFIID	-1.1025
YEL051W	TFIID	-1.12918
YEL052W	TFIID	-0.635539
YEL053C	TFIID	-0.481299
YEL054C	TFIID	-1.12561
YEL056W	TFIID	-1.13539
YEL062W	TFIID	-0.860572
YEL063C	TFIID	-0.490697
YEL072W	TFIID	-0.63207
YER001W	CR	-0.197672
YER002W	TFIID	-0.728189
YER003C	TFIID	-0.446636
YER005W	TFIID	-0.521957
YER007C-A	TFIID	-0.522313
YER008C	TFIID	-1.45868
YER009W	TFIID	-1.22169
YER012W	TFIID	-1.16577
YER013W	TFIID	-1.1211
YER016W	TFIID	-0.69608
YER017C	TFIID	-0.581257
YER019C-A	TFIID	-1.07747
YER021W	TFIID	-1.40436
YER025W	TFIID	-1.6094
YER027C	TFIID	-0.589609
YER028C	CR	-0.373184
YER031C	TFIID	-1.24856
YER032W	TFIID	-0.963418
YER033C	TFIID	-0.382715
YER035W	CR	-0.0046386
YER036C	TFIID	-0.584717
YER038C	TFIID	-0.11244
YER043C	CR	-1.21165
YER044C	CR	-0.0088782
YER047C	TFIID	-0.731302
YER048C	TFIID	-0.838153
YER048W-A	TFIID	-0.630303
YER049W	TFIID	-0.780805
YER050C	TFIID	-0.660397
YER051W	TFIID	-0.489929
YER052C	CR	-0.259781
YER053C	CR	-0.224597
YER055C	CR	-0.12763
YER056C	CR	-0.175114
YER059W	TFIID	-0.82581
YER063W	TFIID	-0.655445
YER065C	TFIID	-0.19809
YER067W	CR	0.622137
YER068W	TFIID	-1.08176
YER071C	TFIID	-0.812075
YER072W	CR	-0.611405
YER074W-A	TFIID	-1.02662
YER075C	TFIID	-0.605111
YER078C	TFIID	-0.716997
YER079W	TFIID	0.226299
YER080W	TFIID	-0.804592
YER086W	TFIID	-0.193757
YER088C	TFIID	-0.587437
YER089C	TFIID	-1.44121
YER090W	TFIID	-0.937617
YER091C	CR	-0.101891
YER093C	TFIID	-1.12634
YER093C-A	TFIID	-0.387554
YER094C	TFIID	-1.57944
YER098W	TFIID	-0.528724
YER099C	TFIID	-1.97431
YER100W	TFIID	-0.513687
YER101C	TFIID	-0.539433
YER103W	TFIID	-0.512706
YER105C	TFIID	-1.11398
YER107C	TFIID	-0.997504
YER112W	TFIID	-0.839162
YER114C	TFIID	-0.300676
YER116C	TFIID	-0.320857
YER117W	TFIID	-0.696812
YER119C	TFIID	-0.515856
YER120W	TFIID	-1.09579
YER122C	TFIID	-1.23195
YER123W	TFIID	-1.01993
YER125W	TFIID	-0.925341
YER129W	TFIID	-1.21327
YER131W	TFIID	-0.394782
YER132C	TFIID	-0.77307
YER133W	TFIID	-1.40483
YER134C	TFIID	-0.924468
YER136W	TFIID	-0.66905
YER139C	TFIID	-0.416135
YER140W	TFIID	-0.476445
YER141W	TFIID	-0.97236
YER142C	TFIID	-0.270474
YER143W	TFIID	-0.654001
YER146W	TFIID	-0.973104
YER147C	TFIID	-0.687392
YER148W	TFIID	-1.32762
YER149C	TFIID	-0.780362
YER150W	CR	0.230527
YER154W	TFIID	-0.901564
YER156C	TFIID	-1.3875
YER157W	TFIID	-1.1586
YER159C	CR	0.0679539
YER161C	TFIID	-0.968061
YER162C	TFIID	-0.434681
YER164W	TFIID	-0.954583
YER165W	TFIID	-0.530901
YER166W	TFIID	-1.07279
YER169W	TFIID	-0.215326
YER170W	TFIID	-0.713871
YER171W	TFIID	-0.402045
YER172C	TFIID	-0.844038
YER173W	TFIID	-1.38797
YER174C	TFIID	-1.89442
YER176W	TFIID	-0.641315
YER177W	CR	-0.0459381
YER178W	TFIID	-1.24264
YER182W	TFIID	-0.931007
YER183C	TFIID	-0.980949
YER184C	TFIID	-0.624128
YER186C	TFIID	-0.980573
YFL004W	CR	-0.97901
YFL005W	TFIID	-1.62071
YFL007W	TFIID	-1.14719
YFL008W	TFIID	-0.956739
YFL009W	TFIID	-1.01126
YFL010C	TFIID	-0.621444
YFL013C	TFIID	-0.739652
YFL016C	TFIID	-0.234211
YFL018C	TFIID	-1.28659
YFL021W	CR	-0.25465
YFL022C	TFIID	-1.14935
YFL023W	TFIID	-0.724677
YFL024C	TFIID	-0.911448
YFL029C	TFIID	-0.500639
YFL031W	CR	-0.218729
YFL033C	TFIID	-0.901972
YFL034C-A	TFIID	-0.712865
YFL034C-B	TFIID	-1.04378
YFL034W	TFIID	-0.910998
YFL036W	TFIID	-0.100049
YFL037W	TFIID	-1.43047
YFL038C	TFIID	-0.999711
YFL039C	TFIID	0.0238672
YFL041W	TFIID	-0.689138
YFL042C	TFIID	-0.846105
YFL044C	TFIID	-0.495827
YFL045C	TFIID	-1.14406
YFL046W	TFIID	-0.513902
YFL047W	TFIID	-1.89088
YFL048C	TFIID	-0.678125
YFR002W	TFIID	-0.769846
YFR003C	TFIID	-1.06741
YFR004W	TFIID	-1.63477
YFR005C	TFIID	-0.83321
YFR006W	TFIID	-0.180868
YFR007W	TFIID	-0.287466
YFR008W	TFIID	-0.761775
YFR009W	TFIID	-1.18141
YFR010W	TFIID	-0.952067
YFR014C	TFIID	-0.365017
YFR015C	CR	-0.0271868
YFR016C	TFIID	-0.382212
YFR020W	TFIID	-0.223786
YFR021W	TFIID	-0.481579
YFR024C-A	TFIID	-0.827336
YFR025C	TFIID	-0.557612
YFR028C	TFIID	-1.44201
YFR029W	TFIID	-0.565115
YFR030W	TFIID	-0.678446
YFR031C-A	TFIID	-0.614873
YFR032C-A	TFIID	-0.409965
YFR033C	CR	0.303179
YFR034C	CR	-0.0588432
YFR037C	TFIID	-0.818162
YFR038W	TFIID	-0.781646
YFR040W	TFIID	-1.27707
YFR041C	TFIID	-0.630337
YFR042W	TFIID	-0.514457
YFR044C	TFIID	-1.15375
YFR046C	TFIID	-0.542518
YFR048W	TFIID	-1.57009
YFR049W	TFIID	-1.03452
YFR050C	TFIID	-1.74532
YFR051C	TFIID	-1.54266
YFR052W	TFIID	-1.55717
YFR053C	CR	-0.0085632
YFR055W	TFIID	-0.450391
YGL001C	TFIID	-0.220811
YGL002W	TFIID	-0.732242
YGL003C	TFIID	-1.02876
YGL004C	TFIID	0.0353807
YGL005C	TFIID	-0.775659
YGL006W	TFIID	-0.235587
YGL009C	TFIID	-0.118458
YGL010W	TFIID	-1.50942
YGL011C	TFIID	-1.9142
YGL013C	TFIID	-0.987153
YGL014W	TFIID	-1.0722
YGL017W	TFIID	-0.871168
YGL018C	TFIID	-0.794547
YGL019W	TFIID	-1.08427
YGL020C	TFIID	-1.02745
YGL030W	TFIID	-0.412061
YGL035C	TFIID	-0.0635615
YGL036W	TFIID	-0.469456
YGL037C	CR	0.353294
YGL038C	CR	-0.128924
YGL040C	TFIID	-0.454823
YGL041W-A	TFIID	-0.822376
YGL043W	TFIID	-1.33887
YGL044C	TFIID	-0.0086739
YGL045W	TFIID	-0.599778
YGL047W	TFIID	-0.387539
YGL048C	TFIID	-0.911558
YGL049C	TFIID	-0.664515
YGL050W	TFIID	-0.346817
YGL054C	TFIID	-1.03797
YGL055W	CR	-0.298558
YGL058W	TFIID	-0.785769
YGL062W	CR	-0.511104
YGL064C	TFIID	-0.921995
YGL066W	TFIID	-0.638583
YGL067W	TFIID	-0.362615
YGL068W	TFIID	-1.01686
YGL070C	TFIID	-1.41806
YGL071W	TFIID	-0.144174
YGL073W	TFIID	-1.31245
YGL076C	TFIID	-0.846588
YGL077C	CR	-0.913931
YGL079W	TFIID	-0.230218
YGL080W	TFIID	-0.68104
YGL082W	TFIID	-0.480292
YGL084C	TFIID	-0.864754
YGL086W	TFIID	-1.26207
YGL087C	TFIID	-0.54998
YGL093W	TFIID	-1.12272
YGL094C	TFIID	-0.768473
YGL105W	TFIID	-1.27195
YGL106W	TFIID	-1.72495
YGL107C	TFIID	-0.944387
YGL110C	TFIID	-0.51276
YGL115W	TFIID	-1.26574
YGL122C	TFIID	-1.23179
YGL123W	TFIID	-0.482581
YGL125W	CR	-0.116128
YGL127C	TFIID	-1.05465
YGL128C	TFIID	-0.449355
YGL129C	TFIID	-0.936213
YGL130W	TFIID	-0.789238
YGL131C	TFIID	-1.23217
YGL133W	TFIID	-0.189342
YGL136C	TFIID	-0.495681
YGL137W	TFIID	-0.927797
YGL139W	TFIID	-0.756942
YGL140C	TFIID	-0.931739
YGL141W	TFIID	-0.879263
YGL142C	TFIID	-0.451741
YGL143C	TFIID	-0.97336
YGL148W	TFIID	-0.79183
YGL151W	TFIID	-1.27184
YGL160W	TFIID	-0.996981
YGL161C	TFIID	-1.11216
YGL162W	TFIID	-0.390301
YGL167C	TFIID	-1.1884
YGL172W	TFIID	-1.25829
YGL173C	TFIID	-1.64829
YGL178W	TFIID	-0.535006
YGL181W	TFIID	-0.448114
YGL186C	TFIID	-0.442182
YGL187C	TFIID	-0.92513
YGL188C-A	TFIID	-0.636972
YGL190C	TFIID	-0.904813
YGL191W	TFIID	-1.18309
YGL195W	TFIID	-1.44144
YGL196W	TFIID	-0.540506
YGL197W	TFIID	-0.995742
YGL198W	TFIID	-0.996629
YGL200C	TFIID	-1.18484
YGL201C	TFIID	-0.478571
YGL202W	TFIID	-0.918697
YGL203C	TFIID	-0.811672
YGL206C	TFIID	-0.818535
YGL207W	TFIID	-1.29476
YGL212W	TFIID	-0.531749
YGL213C	TFIID	-0.910909
YGL215W	TFIID	-1.03984
YGL219C	TFIID	-0.823365
YGL220W	TFIID	-0.463297
YGL221C	TFIID	-0.701755
YGL222C	TFIID	-1.2948
YGL224C	CR	-0.987162
YGL225W	TFIID	-0.473399
YGL226C-A	TFIID	-1.03468
YGL226W	TFIID	-1.50199
YGL227W	TFIID	0.0617834
YGL228W	TFIID	-1.00737
YGL231C	TFIID	-0.223944
YGL233W	TFIID	-0.581375
YGL238W	TFIID	-1.5167
YGL241W	TFIID	-0.779014
YGL242C	TFIID	-0.955155
YGL245W	TFIID	-1.25567
YGL246C	TFIID	-0.630412
YGL247W	TFIID	-1.42427
YGL252C	TFIID	-1.09631
YGL253W	CR	-0.320289
YGL256W	TFIID	-1.4909
YGL257C	TFIID	-1.36667
YGR001C	TFIID	-0.841683
YGR002C	TFIID	-0.661394
YGR003W	TFIID	-0.452533
YGR005C	TFIID	-0.757915
YGR006W	TFIID	-0.0502177
YGR007W	TFIID	-1.26698
YGR008C	CR	-0.228591
YGR009C	TFIID	-0.71047
YGR012W	TFIID	-0.736559
YGR014W	CR	-0.0913282
YGR015C	TFIID	-1.03282
YGR016W	TFIID	-0.834016
YGR019W	TFIID	-0.144511
YGR020C	TFIID	-1.17361
YGR021W	TFIID	-0.643422
YGR023W	TFIID	-0.191035
YGR024C	TFIID	-0.827729
YGR026W	TFIID	-0.808223
YGR028W	TFIID	-0.125246
YGR032W	TFIID	0.301356
YGR033C	TFIID	-0.563058
YGR034W	TFIID	-0.682381
YGR036C	TFIID	-1.02964
YGR037C	TFIID	-0.611001
YGR038W	TFIID	-1.06236
YGR040W	CR	-0.464749
YGR041W	CR	-0.60504
YGR042W	CR	-0.789968
YGR044C	CR	0.341692
YGR046W	TFIID	-0.786954
YGR047C	TFIID	-0.496789
YGR048W	TFIID	-0.766128
YGR049W	TFIID	-0.268807
YGR052W	CR	0.405619
YGR054W	TFIID	-1.25403
YGR055W	CR	0.106286
YGR056W	TFIID	-0.662516
YGR057C	TFIID	-0.961294
YGR060W	CR	-0.338591
YGR061C	TFIID	-0.584938
YGR062C	TFIID	-0.724609
YGR068C	TFIID	-0.266054
YGR074W	TFIID	-0.871912
YGR075C	TFIID	-0.609946
YGR076C	TFIID	-0.96498
YGR079W	CR	-0.13327
YGR081C	TFIID	-1.14559
YGR082W	TFIID	-0.90453
YGR086C	CR	0.120113
YGR089W	TFIID	-1.08851
YGR097W	TFIID	-0.800002
YGR100W	TFIID	-0.792031
YGR104C	TFIID	-0.723111
YGR105W	TFIID	-0.611645
YGR106C	TFIID	-1.16153
YGR111W	TFIID	-0.511789
YGR112W	TFIID	-0.252344
YGR113W	TFIID	-1.26794
YGR116W	TFIID	-0.867513
YGR117C	TFIID	-0.668457
YGR118W	TFIID	-0.860345
YGR119C	TFIID	-0.986571
YGR122W	TFIID	-0.266039
YGR124W	TFIID	-0.16291
YGR125W	TFIID	-0.825554
YGR127W	TFIID	-0.495434
YGR130C	TFIID	-1.3164
YGR132C	TFIID	-0.705181
YGR134W	TFIID	-0.646218
YGR135W	TFIID	-0.981129
YGR136W	CR	-0.277952
YGR141W	TFIID	-0.311305
YGR142W	CR	-0.266047
YGR146C	CR	-0.310061
YGR147C	TFIID	-1.05278
YGR149W	TFIID	-0.676398
YGR150C	TFIID	-0.604095
YGR155W	CR	0.213348
YGR156W	CR	-1.34392
YGR161W-C	TFIID	0.179324
YGR162W	TFIID	-0.842435
YGR165W	TFIID	-0.746499
YGR166W	TFIID	-0.141945
YGR167W	TFIID	-0.611548
YGR168C	TFIID	-0.356722
YGR169C-A	TFIID	-0.403348
YGR170W	TFIID	-0.728111
YGR174C	TFIID	-0.729179
YGR175C	CR	-0.323566
YGR178C	TFIID	-0.898142
YGR179C	TFIID	-1.21674
YGR181W	TFIID	-0.311543
YGR183C	TFIID	-1.49309
YGR184C	TFIID	-0.481131
YGR185C	TFIID	-1.10733
YGR186W	TFIID	-1.12151
YGR187C	TFIID	-1.01822
YGR191W	TFIID	-0.73331
YGR192C	CR	0.261676
YGR193C	TFIID	-0.472688
YGR197C	CR	-0.836324
YGR199W	TFIID	-1.30144
YGR202C	TFIID	-0.371987
YGR204W	CR	-0.175398
YGR205W	TFIID	-0.465281
YGR207C	TFIID	-0.447922
YGR208W	TFIID	-1.02913
YGR209C	CR	-0.0979155
YGR210C	TFIID	-0.468426
YGR214W	TFIID	-0.313888
YGR215W	TFIID	-1.38148
YGR218W	TFIID	-0.796257
YGR222W	CR	-1.05804
YGR223C	TFIID	-1.14281
YGR229C	TFIID	-0.662905
YGR232W	TFIID	-0.902696
YGR235C	TFIID	-0.39444
YGR237C	TFIID	-0.620512
YGR240C	CR	-0.0734736
YGR241C	TFIID	-0.268707
YGR244C	TFIID	-0.0150609
YGR250C	CR	-0.202155
YGR251W	TFIID	-0.812163
YGR252W	TFIID	-1.07034
YGR253C	TFIID	-1.34405
YGR254W	CR	0.0957931
YGR255C	TFIID	-0.673525
YGR257C	TFIID	-0.706945
YGR258C	TFIID	-0.690849
YGR264C	TFIID	-1.39881
YGR266W	TFIID	-0.536302
YGR267C	TFIID	-1.12332
YGR268C	TFIID	-0.636702
YGR270W	TFIID	-0.570344
YGR274C	TFIID	-0.629385
YGR275W	TFIID	-1.18488
YGR277C	TFIID	-0.207965
YGR278W	TFIID	-1.07868
YGR279C	CR	-0.554786
YGR281W	CR	0.097906
YGR282C	TFIID	-1.07339
YGR285C	TFIID	-1.553
YGR286C	TFIID	-0.593159
YGR288W	TFIID	-0.975806
YGR295C	CR	-0.628485
YHL001W	TFIID	-0.610518
YHL004W	TFIID	-0.921526
YHL007C	TFIID	-0.849597
YHL008C	TFIID	-0.558288
YHL009C	TFIID	-0.619012
YHL010C	TFIID	-0.599835
YHL011C	TFIID	-1.0545
YHL015W	TFIID	-0.689399
YHL017W	TFIID	-0.580975
YHL018W	TFIID	-0.96166
YHL019C	TFIID	-1.0925
YHL021C	TFIID	-0.274461
YHL023C	TFIID	-1.31378
YHL027W	TFIID	-0.536603
YHL029C	TFIID	-0.493206
YHL030W	TFIID	-0.729576
YHL032C	TFIID	-0.810666
YHL033C	TFIID	-0.871318
YHL034C	TFIID	-1.45161
YHL035C	CR	-0.592587
YHL036W	CR	-0.527664
YHL038C	TFIID	-1.03074
YHR001W-A	TFIID	-0.624773
YHR002W	TFIID	-0.415925
YHR004C	TFIID	-0.563738
YHR005C-A	TFIID	-0.842745
YHR007C	CR	0.0121513
YHR007C-A	CR	-0.094367
YHR008C	CR	0.0252192
YHR009C	TFIID	-0.823049
YHR010W	TFIID	-0.524375
YHR012W	TFIID	-0.51885
YHR016C	TFIID	-0.810647
YHR017W	TFIID	-0.748705
YHR021C	TFIID	-0.562299
YHR026W	TFIID	-1.21908
YHR027C	TFIID	-1.43209
YHR028C	TFIID	-0.0320313
YHR030C	TFIID	-0.396567
YHR036W	TFIID	-0.94767
YHR037W	CR	-0.597036
YHR038W	TFIID	-0.444937
YHR039C	TFIID	-0.648702
YHR039C-A	TFIID	-1.21623
YHR040W	TFIID	-1.26233
YHR042W	TFIID	-0.596568
YHR043C	TFIID	-0.678145
YHR045W	TFIID	-0.969175
YHR047C	TFIID	-0.361086
YHR049W	CR	-0.241923
YHR050W	TFIID	-0.75312
YHR051W	TFIID	-1.15347
YHR056C	TFIID	-1.85016
YHR058C	TFIID	-0.738197
YHR059W	TFIID	-0.882256
YHR060W	TFIID	-0.451319
YHR068W	TFIID	-1.09909
YHR071W	CR	-0.229111
YHR073W	TFIID	-1.37394
YHR074W	TFIID	-1.03876
YHR076W	TFIID	-0.784182
YHR077C	TFIID	-1.06636
YHR080C	TFIID	-0.878337
YHR082C	TFIID	-0.897634
YHR083W	TFIID	-1.00551
YHR086W	TFIID	-1.01285
YHR088W	TFIID	-1.37576
YHR090C	TFIID	-1.29499
YHR091C	TFIID	-0.75361
YHR092C	CR	0.0250165
YHR097C	TFIID	-0.434775
YHR098C	TFIID	-1.10389
YHR099W	TFIID	-1.35397
YHR101C	TFIID	-0.86877
YHR102W	TFIID	-0.953651
YHR103W	TFIID	-0.568241
YHR104W	CR	-0.511595
YHR107C	TFIID	-1.51623
YHR108W	TFIID	-1.22684
YHR110W	TFIID	-0.886159
YHR111W	TFIID	-1.24411
YHR113W	TFIID	-0.54819
YHR114W	TFIID	-0.284857
YHR115C	TFIID	-1.6751
YHR116W	TFIID	-1.23476
YHR117W	TFIID	-0.790284
YHR118C	TFIID	-1.41354
YHR119W	TFIID	-1.31453
YHR123W	TFIID	-0.900648
YHR128W	CR	-0.806242
YHR131C	TFIID	-1.10223
YHR132C	TFIID	-0.504774
YHR132W-A	TFIID	-0.793483
YHR133C	TFIID	-0.885482
YHR134W	TFIID	-0.171042
YHR135C	TFIID	-1.34249
YHR138C	TFIID	-0.363541
YHR141C	TFIID	-0.856438
YHR143W-A	TFIID	-1.00284
YHR150W	TFIID	-0.604399
YHR151C	TFIID	-0.838733
YHR161C	TFIID	-1.4066
YHR162W	CR	-0.276552
YHR163W	TFIID	-0.603056
YHR165C	TFIID	-0.943814
YHR174W	CR	0.345748
YHR179W	CR	-0.435455
YHR181W	TFIID	-0.333112
YHR186C	TFIID	-0.715359
YHR187W	TFIID	-0.786789
YHR188C	TFIID	-0.71494
YHR190W	CR	0.113644
YHR191C	TFIID	-0.635366
YHR192W	TFIID	-0.467238
YHR193C	TFIID	-1.38937
YHR194W	TFIID	-0.950801
YHR195W	TFIID	-1.12907
YHR198C	TFIID	-0.758967
YHR200W	TFIID	-1.19406
YHR201C	TFIID	-0.461403
YHR203C	TFIID	-0.298047
YHR204W	TFIID	-1.24303
YHR205W	TFIID	-0.847943
YHR206W	TFIID	-0.612024
YIL001W	TFIID	-1.01376
YIL002C	TFIID	-1.29416
YIL002W-A	TFIID	-0.950269
YIL005W	TFIID	-0.565012
YIL006W	TFIID	-1.40412
YIL007C	TFIID	-0.665735
YIL009C-A	TFIID	-0.48644
YIL010W	TFIID	-0.221898
YIL014W	TFIID	-0.399674
YIL017C	TFIID	-0.614147
YIL018W	TFIID	-0.865254
YIL021W	TFIID	-1.1095
YIL022W	TFIID	-1.22768
YIL023C	TFIID	-1.01959
YIL027C	TFIID	-0.949348
YIL029C	TFIID	-0.388025
YIL030C	TFIID	-1.54408
YIL031W	TFIID	-0.770154
YIL033C	TFIID	-0.815311
YIL034C	TFIID	-1.06636
YIL035C	TFIID	-0.992477
YIL036W	TFIID	-1.29052
YIL038C	TFIID	-1.18215
YIL039W	TFIID	-0.887989
YIL040W	TFIID	-0.872162
YIL041W	TFIID	-1.64148
YIL042C	TFIID	-1.1628
YIL044C	TFIID	-1.3151
YIL045W	TFIID	-0.0328807
YIL046W	TFIID	-0.872627
YIL047C	TFIID	-0.384903
YIL048W	TFIID	-0.535098
YIL049W	TFIID	-0.367387
YIL050W	TFIID	-0.143046
YIL051C	CR	-0.25663
YIL053W	CR	-0.291961
YIL056W	CR	0.0562132
YIL062C	TFIID	-1.18559
YIL063C	TFIID	-0.547259
YIL068C	TFIID	-0.532352
YIL069C	TFIID	-0.744541
YIL074C	TFIID	-0.308502
YIL075C	TFIID	-1.27671
YIL076W	TFIID	-1.0437
YIL077C	TFIID	-0.432179
YIL083C	TFIID	-0.737063
YIL084C	TFIID	-0.820606
YIL085C	TFIID	-0.626194
YIL088C	TFIID	-0.530386
YIL095W	TFIID	-1.29292
YIL097W	TFIID	-0.365937
YIL102C-A	TFIID	-0.84502
YIL107C	TFIID	-0.410174
YIL108W	CR	-1.62064
YIL111W	CR	-0.404749
YIL115C	TFIID	-1.99153
YIL118W	TFIID	-0.55331
YIL122W	TFIID	0.0311129
YIL123W	CR	0.366232
YIL124W	TFIID	-0.621019
YIL125W	TFIID	-1.17606
YIL126W	TFIID	-1.47443
YIL128W	TFIID	-1.22175
YIL129C	TFIID	-1.30263
YIL130W	TFIID	-0.857162
YIL133C	TFIID	-0.396249
YIL136W	TFIID	-0.864319
YIL137C	TFIID	-0.507857
YIL142W	TFIID	-1.55385
YIL143C	TFIID	-0.918443
YIL144W	TFIID	-0.605524
YIL145C	TFIID	-1.23485
YIL147C	TFIID	-0.688322
YIL148W	TFIID	-0.863773
YIL152W	TFIID	-0.506123
YIL153W	TFIID	-1.03577
YIL154C	TFIID	-0.864587
YIL155C	CR	-0.698203
YIL156W	TFIID	-0.733576
YIL162W	TFIID	-1.1214
YIL164C	TFIID	-1.02325
YIR001C	TFIID	-0.688016
YIR002C	TFIID	-0.850665
YIR003W	TFIID	-1.29305
YIR004W	TFIID	-1.08703
YIR006C	TFIID	-1.08185
YIR007W	TFIID	0.0578745
YIR008C	TFIID	-0.923969
YIR009W	TFIID	-1.22279
YIR010W	TFIID	-1.43893
YIR014W	TFIID	-0.371829
YIR018W	TFIID	-0.744483
YIR022W	TFIID	-1.12002
YIR031C	TFIID	-1.23611
YIR033W	TFIID	-0.780761
YIR036C	TFIID	-0.533613
YIR037W	TFIID	-0.916589
YIR038C	TFIID	-0.396827
YJL001W	TFIID	-1.13883
YJL002C	TFIID	-0.984005
YJL003W	TFIID	-0.583311
YJL004C	TFIID	-0.758145
YJL005W	TFIID	-0.220643
YJL008C	TFIID	-0.957919
YJL012C	CR	-0.068448
YJL014W	TFIID	-1.65668
YJL016W	CR	-0.260262
YJL020C	TFIID	-1.08886
YJL023C	TFIID	-0.735264
YJL024C	TFIID	-0.443185
YJL029C	TFIID	-0.437954
YJL030W	TFIID	-0.547621
YJL031C	TFIID	-0.642641
YJL034W	CR	0.414623
YJL036W	TFIID	-1.06033
YJL039C	TFIID	-0.784947
YJL041W	TFIID	-1.19017
YJL042W	TFIID	-0.341179
YJL044C	TFIID	-0.601652
YJL046W	TFIID	-0.193468
YJL047C	TFIID	-0.587568
YJL052W	CR	-0.212452
YJL053W	TFIID	-0.901578
YJL054W	TFIID	-0.855472
YJL055W	TFIID	-1.29814
YJL056C	TFIID	-1.35448
YJL057C	TFIID	-0.981008
YJL059W	TFIID	-0.827782
YJL060W	TFIID	-0.15825
YJL062W	TFIID	-1.14217
YJL062W-A	TFIID	-0.998532
YJL063C	TFIID	-1.37882
YJL065C	TFIID	-1.19114
YJL066C	TFIID	-0.608223
YJL068C	TFIID	-0.778696
YJL076W	TFIID	-0.793532
YJL078C	CR	-0.22736
YJL079C	CR	0.280356
YJL082W	CR	-0.078299
YJL083W	TFIID	-0.507361
YJL084C	TFIID	-0.396118
YJL085W	TFIID	-0.393705
YJL087C	TFIID	-0.699736
YJL088W	CR	-0.376127
YJL090C	TFIID	-0.939244
YJL091C	TFIID	-0.885971
YJL093C	TFIID	-0.645413
YJL094C	TFIID	-0.286076
YJL100W	TFIID	-0.873326
YJL101C	CR	-0.498301
YJL102W	TFIID	-0.47332
YJL103C	TFIID	-0.375684
YJL104W	TFIID	-1.15929
YJL111W	TFIID	-1.04918
YJL117W	TFIID	-1.08623
YJL122W	TFIID	-1.17659
YJL123C	TFIID	-0.955217
YJL127C-B	TFIID	-0.787718
YJL128C	TFIID	-0.814992
YJL129C	TFIID	-0.672544
YJL133C-A	CR	0.220293
YJL133W	TFIID	-1.22771
YJL134W	TFIID	-0.477742
YJL138C	CR	-0.537849
YJL139C	TFIID	-0.377681
YJL140W	TFIID	-1.15617
YJL143W	TFIID	-0.955154
YJL144W	CR	-0.425714
YJL145W	TFIID	-0.744366
YJL149W	TFIID	-0.141293
YJL154C	TFIID	-1.03355
YJL158C	CR	0.277857
YJL164C	TFIID	-0.383423
YJL165C	TFIID	-1.15556
YJL166W	TFIID	-0.831737
YJL167W	CR	-0.655944
YJL171C	CR	-0.44057
YJL172W	TFIID	-0.426979
YJL173C	TFIID	-0.690561
YJL174W	TFIID	-0.975942
YJL177W	TFIID	-0.616556
YJL178C	TFIID	-0.482303
YJL179W	TFIID	-0.832655
YJL180C	TFIID	-1.51118
YJL183W	TFIID	-1.74433
YJL189W	TFIID	-0.700084
YJL190C	TFIID	-0.823275
YJL191W	CR	-0.371733
YJL192C	TFIID	-0.682469
YJL197W	TFIID	-0.902271
YJL205C	TFIID	-0.349484
YJL206C	TFIID	-0.558065
YJL207C	TFIID	-0.383959
YJL209W	TFIID	-1.14538
YJL212C	CR	-0.317786
YJR001W	TFIID	-0.330103
YJR004C	CR	-0.713172
YJR005W	TFIID	-0.745305
YJR007W	TFIID	-1.29629
YJR009C	CR	-0.0429446
YJR010W	TFIID	-0.645958
YJR011C	TFIID	-0.0798337
YJR012C	TFIID	-0.748916
YJR013W	TFIID	-0.536913
YJR014W	TFIID	-0.364077
YJR016C	CR	-0.283458
YJR017C	TFIID	-1.1095
YJR021C	TFIID	-0.777756
YJR022W	TFIID	-0.784108
YJR033C	TFIID	-1.39311
YJR034W	TFIID	-1.00874
YJR035W	TFIID	-0.419277
YJR040W	TFIID	-0.461742
YJR044C	TFIID	-1.05846
YJR045C	CR	0.411627
YJR046W	TFIID	-0.873302
YJR048W	CR	-0.158789
YJR049C	TFIID	-0.570175
YJR050W	TFIID	-0.837416
YJR051W	TFIID	-0.347831
YJR052W	TFIID	-0.414304
YJR055W	TFIID	-0.493082
YJR056C	TFIID	-0.438154
YJR057W	TFIID	-0.753776
YJR059W	CR	-0.661583
YJR060W	TFIID	-0.459222
YJR062C	TFIID	-0.928367
YJR064W	TFIID	-1.21698
YJR065C	TFIID	-1.41112
YJR066W	TFIID	-0.545863
YJR075W	TFIID	-0.804345
YJR077C	TFIID	-0.488075
YJR080C	TFIID	-0.907385
YJR083C	TFIID	-1.02311
YJR084W	TFIID	-0.729323
YJR085C	TFIID	-0.72071
YJR086W	TFIID	-1.15568
YJR088C	TFIID	-1.0609
YJR089W	TFIID	-0.689925
YJR090C	TFIID	-0.513349
YJR091C	TFIID	-0.595065
YJR093C	TFIID	-1.27112
YJR094W-A	TFIID	-0.868027
YJR096W	TFIID	-0.378697
YJR097W	TFIID	-0.524807
YJR100C	TFIID	-0.586587
YJR101W	TFIID	-0.830798
YJR102C	TFIID	-0.443258
YJR103W	CR	-0.560332
YJR105W	TFIID	-0.840133
YJR106W	TFIID	-1.13699
YJR109C	CR	-0.057462
YJR110W	TFIID	-0.677946
YJR113C	TFIID	-1.4498
YJR117W	TFIID	-0.880129
YJR118C	TFIID	-0.596671
YJR121W	CR	-0.530348
YJR122W	TFIID	-0.926228
YJR123W	TFIID	-0.53732
YJR125C	TFIID	-1.61306
YJR126C	TFIID	-0.66321
YJR127C	CR	0.147405
YJR130C	TFIID	-0.712973
YJR131W	TFIID	-0.48401
YJR134C	TFIID	-0.657267
YJR135C	TFIID	-0.844216
YJR135W-A	TFIID	-0.931127
YJR137C	TFIID	-0.52325
YJR138W	TFIID	-1.79581
YJR139C	TFIID	-1.02667
YJR140C	TFIID	-1.03511
YJR141W	TFIID	-0.891809
YJR142W	TFIID	-0.436668
YJR145C	TFIID	-0.744147
YKL001C	TFIID	-0.784698
YKL002W	TFIID	-0.803975
YKL003C	TFIID	-1.08495
YKL005C	TFIID	-1.4875
YKL007W	TFIID	-0.778754
YKL008C	CR	-0.245314
YKL016C	TFIID	-1.05212
YKL017C	TFIID	-0.94395
YKL019W	TFIID	-1.41822
YKL020C	TFIID	-0.75089
YKL023W	TFIID	-1.18014
YKL025C	TFIID	-0.375479
YKL027W	TFIID	-0.510381
YKL032C	TFIID	-0.41273
YKL033W	TFIID	-0.674468
YKL034W	TFIID	-0.737974
YKL035W	CR	-0.31323
YKL038W	TFIID	-0.488202
YKL039W	CR	-0.516455
YKL040C	CR	-0.895412
YKL041W	TFIID	-0.851686
YKL043W	CR	-0.288988
YKL046C	TFIID	-0.705572
YKL047W	TFIID	-0.994382
YKL048C	TFIID	-1.58983
YKL051W	CR	-0.244357
YKL054C	CR	-1.01814
YKL056C	CR	-0.0183735
YKL057C	TFIID	-1.08975
YKL058W	TFIID	-0.77932
YKL059C	TFIID	-0.746089
YKL060C	CR	0.161738
YKL062W	TFIID	0.019993
YKL063C	TFIID	-0.850525
YKL064W	TFIID	-1.49551
YKL067W	TFIID	-0.417848
YKL068W	TFIID	-0.708704
YKL068W-A	CR	-0.0350215
YKL069W	TFIID	-1.08808
YKL072W	TFIID	-0.240029
YKL073W	TFIID	-1.14923
YKL074C	TFIID	-0.833279
YKL079W	TFIID	-0.794091
YKL080W	TFIID	-1.07641
YKL081W	CR	-0.153625
YKL082C	TFIID	-1.11899
YKL085W	CR	0.0518912
YKL086W	CR	-0.0925585
YKL087C	TFIID	-1.04403
YKL090W	TFIID	-0.890891
YKL091C	TFIID	-0.670743
YKL092C	TFIID	-0.628246
YKL096W-A	CR	0.219277
YKL100C	TFIID	-0.844248
YKL103C	CR	-0.10552
YKL104C	TFIID	-0.702197
YKL106W	TFIID	-0.616539
YKL109W	CR	0.064084
YKL110C	TFIID	-0.458359
YKL112W	TFIID	-0.65673
YKL114C	TFIID	-0.788803
YKL116C	TFIID	-1.04563
YKL117W	TFIID	-0.949491
YKL119C	TFIID	-0.395612
YKL120W	CR	-0.815414
YKL122C	TFIID	-1.05818
YKL124W	TFIID	-0.565033
YKL125W	CR	-1.28098
YKL126W	TFIID	-0.989324
YKL127W	TFIID	-0.817819
YKL128C	TFIID	-0.47644
YKL129C	TFIID	-1.10857
YKL133C	TFIID	-0.484188
YKL135C	TFIID	-1.16695
YKL137W	TFIID	-0.76442
YKL138C	TFIID	-0.882325
YKL140W	TFIID	-0.20802
YKL141W	TFIID	-0.324513
YKL142W	TFIID	-1.09065
YKL145W	TFIID	-1.41016
YKL148C	TFIID	-0.0439458
YKL150W	CR	-0.405973
YKL152C	CR	0.091791
YKL156W	TFIID	-1.01752
YKL159C	TFIID	-0.41055
YKL160W	TFIID	-0.650765
YKL164C	CR	0.358778
YKL167C	TFIID	-1.36889
YKL168C	TFIID	-0.778575
YKL170W	TFIID	-0.963793
YKL176C	TFIID	-0.955494
YKL179C	TFIID	-1.40824
YKL182W	CR	-0.0020008
YKL183W	TFIID	-0.229028
YKL184W	TFIID	-0.861137
YKL189W	TFIID	-0.769904
YKL190W	TFIID	-0.585881
YKL192C	TFIID	-1.21759
YKL193C	TFIID	-0.606444
YKL194C	TFIID	-0.65029
YKL195W	TFIID	-1.47383
YKL196C	TFIID	-1.68298
YKL197C	TFIID	-0.44265
YKL198C	CR	-0.101925
YKL201C	TFIID	-0.72131
YKL207W	TFIID	-1.60414
YKL208W	TFIID	-0.660239
YKL212W	TFIID	-0.970394
YKL213C	TFIID	-0.903205
YKL215C	TFIID	-0.944938
YKL219W	TFIID	-0.687147
YKR001C	TFIID	-0.953909
YKR002W	TFIID	-0.824839
YKR004C	TFIID	-0.53211
YKR006C	TFIID	-1.31947
YKR007W	TFIID	-1.12388
YKR008W	TFIID	-1.37904
YKR010C	TFIID	-0.741881
YKR011C	TFIID	-0.129459
YKR013W	CR	-0.440516
YKR014C	TFIID	-1.15805
YKR016W	TFIID	-0.641239
YKR017C	TFIID	-0.815487
YKR018C	TFIID	-0.999164
YKR019C	TFIID	-0.482603
YKR020W	TFIID	-0.248642
YKR021W	TFIID	-0.839589
YKR022C	TFIID	-0.594393
YKR023W	TFIID	-0.822359
YKR025W	TFIID	-0.952071
YKR026C	TFIID	-0.651771
YKR027W	TFIID	-0.525841
YKR028W	TFIID	-0.874016
YKR029C	TFIID	-1.03443
YKR030W	TFIID	-0.996421
YKR038C	TFIID	-1.02629
YKR042W	CR	0.169703
YKR045C	TFIID	-0.657836
YKR046C	TFIID	-0.346564
YKR048C	TFIID	-1.20272
YKR051W	TFIID	-0.613818
YKR057W	TFIID	-0.927101
YKR058W	TFIID	-0.653203
YKR062W	TFIID	-0.67387
YKR065C	TFIID	-0.705068
YKR067W	TFIID	-0.671999
YKR068C	TFIID	-1.13356
YKR071C	CR	-0.46356
YKR072C	TFIID	-1.3632
YKR074W	TFIID	-0.514757
YKR076W	CR	-0.522812
YKR080W	TFIID	-0.423283
YKR084C	TFIID	-1.05396
YKR085C	TFIID	-1.4904
YKR086W	TFIID	-0.826738
YKR087C	TFIID	-0.690072
YKR089C	TFIID	-0.741562
YKR090W	TFIID	-0.135355
YKR093W	CR	0.17548
YKR094C	TFIID	-0.666553
YKR095W	TFIID	-0.866172
YKR096W	TFIID	-0.731034
YKR098C	TFIID	-0.0334913
YKR100C	TFIID	-1.34598
YKR101W	TFIID	-0.355081
YLL001W	TFIID	-1.48712
YLL006W	TFIID	-0.965436
YLL007C	TFIID	-1.06138
YLL009C	TFIID	-0.781638
YLL010C	TFIID	-0.999452
YLL013C	TFIID	-0.727286
YLL015W	TFIID	-0.258218
YLL018C	TFIID	-1.16701
YLL018C-A	TFIID	-0.283449
YLL019C	TFIID	-0.233292
YLL021W	TFIID	-0.890589
YLL023C	TFIID	-0.824275
YLL026W	CR	-0.211055
YLL027W	CR	-0.619291
YLL028W	CR	0.130584
YLL029W	TFIID	-0.591311
YLL031C	TFIID	-0.134426
YLL038C	TFIID	-1.32253
YLL039C	CR	0.181083
YLL040C	TFIID	-0.782728
YLL041C	CR	-0.658159
YLL043W	TFIID	-0.982682
YLL045C	TFIID	-1.18496
YLL048C	TFIID	-0.8104
YLL049W	CR	-0.857569
YLL050C	TFIID	-1.20601
YLR001C	TFIID	-0.249605
YLR003C	TFIID	-1.04767
YLR005W	TFIID	-1.12137
YLR006C	TFIID	-0.154229
YLR016C	TFIID	-0.946883
YLR017W	TFIID	-0.937574
YLR019W	TFIID	-0.889537
YLR022C	TFIID	-0.846826
YLR023C	TFIID	-0.240182
YLR024C	TFIID	-0.801418
YLR025W	TFIID	-0.893226
YLR026C	TFIID	-1.05777
YLR027C	CR	-0.562727
YLR028C	TFIID	-0.396785
YLR033W	TFIID	-0.959241
YLR034C	CR	-0.240173
YLR035C	TFIID	-0.678245
YLR040C	CR	-0.196599
YLR043C	TFIID	-0.553732
YLR044C	CR	0.189572
YLR045C	TFIID	-0.552117
YLR047C	TFIID	-0.33605
YLR048W	TFIID	-0.886862
YLR058C	TFIID	0.054002
YLR060W	TFIID	-1.42097
YLR061W	TFIID	-0.472929
YLR064W	CR	-0.276469
YLR069C	TFIID	-0.501334
YLR071C	TFIID	-1.05888
YLR072W	TFIID	-0.8807
YLR075W	CR	-0.216494
YLR078C	TFIID	-0.982012
YLR079W	CR	-0.638078
YLR089C	TFIID	-0.639529
YLR090W	TFIID	-0.617679
YLR091W	TFIID	-0.317236
YLR092W	TFIID	-0.658656
YLR093C	TFIID	-1.17163
YLR094C	TFIID	-0.139873
YLR095C	TFIID	-1.14637
YLR096W	TFIID	-0.986569
YLR098C	TFIID	-1.04809
YLR100W	TFIID	-0.336722
YLR110C	CR	0.566143
YLR113W	CR	-0.400129
YLR114C	TFIID	-0.881082
YLR115W	TFIID	-0.455446
YLR116W	TFIID	-0.348415
YLR117C	TFIID	-0.91904
YLR118C	TFIID	-0.679646
YLR119W	TFIID	-0.614294
YLR120C	TFIID	-0.437797
YLR127C	TFIID	-0.826722
YLR138W	TFIID	-0.744704
YLR139C	TFIID	-0.396892
YLR143W	TFIID	-0.401246
YLR144C	TFIID	-0.950852
YLR145W	TFIID	-1.10195
YLR147C	TFIID	-1.02421
YLR148W	TFIID	-0.564378
YLR149C	TFIID	0.197437
YLR150W	TFIID	-0.566312
YLR152C	TFIID	-0.16189
YLR163C	TFIID	-1.1452
YLR166C	TFIID	-0.506296
YLR167W	TFIID	-0.746562
YLR175W	TFIID	-1.12267
YLR177W	CR	0.00913547
YLR179C	CR	-0.547795
YLR185W	TFIID	-0.864137
YLR187W	TFIID	-1.02401
YLR189C	TFIID	-0.113593
YLR190W	TFIID	-0.435499
YLR192C	TFIID	-1.08121
YLR193C	TFIID	-0.489391
YLR195C	TFIID	-0.574485
YLR199C	TFIID	-0.962383
YLR200W	TFIID	-1.08814
YLR201C	TFIID	-0.555219
YLR203C	TFIID	-1.39643
YLR204W	TFIID	-1.08397
YLR206W	TFIID	-0.876761
YLR208W	TFIID	-1.41165
YLR214W	CR	-0.0745517
YLR216C	TFIID	-0.0187495
YLR218C	TFIID	-0.720525
YLR219W	TFIID	-0.76945
YLR220W	TFIID	-0.759785
YLR223C	TFIID	-0.489439
YLR225C	CR	-0.308569
YLR228C	TFIID	0.0731885
YLR229C	TFIID	-0.796337
YLR231C	TFIID	0.145723
YLR238W	TFIID	-0.71751
YLR239C	TFIID	-0.422207
YLR240W	TFIID	-0.623848
YLR244C	TFIID	-0.355816
YLR245C	TFIID	-0.838698
YLR246W	TFIID	-0.793777
YLR249W	CR	-0.0301134
YLR250W	TFIID	-0.438189
YLR251W	TFIID	-0.50178
YLR253W	TFIID	-0.425797
YLR254C	TFIID	-0.310888
YLR256W	CR	0.147796
YLR257W	TFIID	-0.116464
YLR259C	TFIID	-0.537253
YLR260W	TFIID	-0.63105
YLR262C	TFIID	-1.10288
YLR268W	TFIID	-0.824432
YLR270W	TFIID	-0.373196
YLR271W	TFIID	-0.286713
YLR274W	TFIID	-0.993679
YLR277C	TFIID	-0.953325
YLR278C	TFIID	-0.467472
YLR283W	TFIID	-0.967377
YLR287C-A	CR	-0.909829
YLR288C	TFIID	-0.272374
YLR289W	TFIID	-0.352987
YLR292C	TFIID	-1.10014
YLR293C	TFIID	-1.15883
YLR295C	TFIID	-0.676779
YLR297W	CR	-0.0563052
YLR298C	TFIID	-0.7451
YLR301W	TFIID	-0.53215
YLR309C	TFIID	-1.05349
YLR310C	TFIID	-0.947154
YLR312W-A	TFIID	-1.14884
YLR314C	TFIID	-0.659167
YLR321C	TFIID	-0.641887
YLR325C	TFIID	-0.330052
YLR328W	TFIID	-0.478615
YLR330W	TFIID	-0.783348
YLR332W	TFIID	0.059449
YLR335W	TFIID	-0.76191
YLR340W	TFIID	-0.709906
YLR344W	TFIID	-0.647882
YLR345W	TFIID	-0.676045
YLR347C	TFIID	-1.22
YLR350W	TFIID	-0.211251
YLR353W	TFIID	-0.311847
YLR354C	CR	-0.280325
YLR357W	TFIID	-1.44024
YLR359W	TFIID	-0.912215
YLR360W	TFIID	-0.492799
YLR361C	TFIID	-0.698951
YLR361C-A	TFIID	-0.392151
YLR362W	TFIID	-0.796292
YLR363C	TFIID	-0.752724
YLR363W-A	TFIID	-0.531197
YLR367W	TFIID	-0.983857
YLR369W	TFIID	-0.841675
YLR370C	TFIID	-1.32708
YLR371W	TFIID	-1.17318
YLR372W	TFIID	-0.562111
YLR373C	TFIID	-1.61238
YLR375W	TFIID	-1.41922
YLR376C	TFIID	-0.532918
YLR378C	TFIID	-1.19492
YLR380W	TFIID	-0.745129
YLR382C	TFIID	-0.710547
YLR383W	TFIID	-0.570565
YLR387C	TFIID	-0.990782
YLR389C	TFIID	-0.573165
YLR390W-A	CR	-1.12094
YLR392C	TFIID	-0.553476
YLR393W	TFIID	-0.375398
YLR395C	TFIID	-0.991901
YLR398C	TFIID	-0.91262
YLR403W	TFIID	-0.278006
YLR404W	TFIID	-0.749429
YLR406C	TFIID	-0.746158
YLR407W	TFIID	-0.720513
YLR408C	TFIID	-0.317109
YLR412C-A	CR	-0.0064477
YLR412W	TFIID	-1.24553
YLR421C	TFIID	-1.58909
YLR422W	TFIID	-1.06685
YLR425W	TFIID	-0.65946
YLR426W	TFIID	-1.76468
YLR427W	TFIID	-1.56982
YLR431C	TFIID	-0.266756
YLR432W	CR	-0.193507
YLR436C	TFIID	-0.930533
YLR441C	TFIID	-0.629761
YLR447C	TFIID	-1.30952
YLR448W	TFIID	-0.761744
YLR450W	TFIID	-0.881967
YLR454W	TFIID	-0.825284
YLR455W	TFIID	-0.477576
YLR459W	TFIID	-1.14281
YML001W	TFIID	-1.0936
YML003W	TFIID	-0.500748
YML004C	TFIID	-0.897356
YML006C	TFIID	-0.487305
YML007W	CR	-0.859433
YML008C	CR	0.47099
YML009C	TFIID	-0.815688
YML010W	TFIID	-1.07293
YML011C	TFIID	-0.553615
YML012W	TFIID	-0.96331
YML016C	TFIID	-1.12871
YML017W	TFIID	-0.608982
YML018C	TFIID	-0.54857
YML020W	TFIID	-0.736845
YML021C	TFIID	-1.04146
YML024W	TFIID	-0.880098
YML025C	TFIID	-1.0261
YML026C	TFIID	-0.949478
YML029W	TFIID	-0.686233
YML030W	TFIID	-1.01048
YML031W	TFIID	-0.897153
YML032C	TFIID	-1.15676
YML034W	TFIID	-0.0742099
YML035C	TFIID	-0.50532
YML038C	TFIID	-1.12798
YML041C	TFIID	-0.822173
YML048W	CR	-1.39458
YML049C	TFIID	-1.41456
YML051W	TFIID	-0.819874
YML052W	CR	-0.289926
YML053C	TFIID	-0.978561
YML055W	TFIID	-0.626996
YML057W	TFIID	-0.523238
YML058W	CR	0.0540993
YML059C	TFIID	-0.185744
YML062C	TFIID	-1.16778
YML063W	TFIID	-0.945494
YML064C	TFIID	-1.06724
YML067C	TFIID	-0.641025
YML069W	TFIID	-0.977399
YML070W	TFIID	-0.518951
YML071C	TFIID	-0.40354
YML072C	TFIID	-1.04659
YML073C	TFIID	-1.13049
YML074C	TFIID	-0.85371
YML075C	TFIID	-0.392213
YML077W	TFIID	-0.68426
YML078W	TFIID	-0.383255
YML079W	TFIID	-0.476668
YML081C-A	TFIID	-1.41639
YML085C	TFIID	-1.64776
YML086C	TFIID	-0.945356
[truncated: 884 more rows]

## Sheet: 4E
gene_id	class	TFIIB Bdf12deg	TFIIB Taf13deg
YAL001C	TFIID	-1.92828	-1.15853
YAL002W	TFIID	-1.11059	-1.33194
YAL003W	CR	-0.403909	-1.35693
YAL005C	CR	-0.461238	-1.90103
YAL007C	TFIID	-2.07168	-2.23281
YAL008W	TFIID	-1.57908	-1.84412
YAL009W	TFIID	-2.80088	-1.88311
YAL010C	TFIID	-2.7908	-1.8735
YAL011W	TFIID	-1.55483	-1.38103
YAL012W	CR	-0.469852	-0.623224
YAL013W	TFIID	-2.22703	-1.54847
YAL014C	TFIID	-2.24172	-1.53581
YAL015C	TFIID	-0.723665	-0.364459
YAL016W	TFIID	-1.69594	-1.16347
YAL017W	TFIID	-1.86929	-1.61659
YAL018C		-1.13323	-1.16334
YAL019W	TFIID	-2.2989	-1.73086
YAL020C		-2.38184	-1.89251
YAL021C	TFIID	-2.55855	-1.85583
YAL022C	TFIID	-2.22714	-2.51746
YAL023C	TFIID	-1.94212	-2.09744
YAL024C	TFIID	-2.13755	-1.03701
YAL025C	TFIID	-2.08418	-1.92294
YAL026C	TFIID	-1.64142	-1.64804
YAL027W	TFIID	-1.92954	-1.36909
YAL028W	TFIID	-0.974092	-0.572877
YAL029C	TFIID	-1.89335	-1.6169
YAL030W	TFIID	-2.6529	-1.41304
YAL031C	TFIID	-2.77039	-1.24563
YAL032C	TFIID	-2.0992	-1.42661
YAL033W	TFIID	-2.74247	-1.86591
YAL034C	TFIID	-0.600997	-0.617174
YAL034W-A	TFIID	-1.79812	-1.74178
YAL035W	TFIID	-2.19193	-1.55828
YAL036C	TFIID	-2.25089	-1.60922
YAL037C-A		0.109014	0.0218671
YAL037W		-0.754752	-0.769562
YAL038W	CR	0.256835	0.0771335
YAL039C	TFIID	-0.963832	-1.03534
YAL040C	CR	-0.517141	-1.64924
YAL041W	TFIID	-2.36592	-1.55919
YAL042W	TFIID	-1.96973	-1.78841
YAL043C	TFIID	-1.94827	-1.83385
YAL044C	TFIID	-1.10812	-1.75974
YAL044W-A	TFIID	-2.19898	-1.65692
YAL046C	TFIID	-2.26379	-1.74024
YAL047C	TFIID	-1.42345	-1.6729
YAL048C	TFIID	-1.51832	-1.17178
YAL049C	TFIID	-1.32824	-1.93093
YAL051W	TFIID	-1.74536	-1.74673
YAL053W	TFIID	-1.43362	-1.57364
YAL054C		-0.392416	0.0591834
YAL055W		-1.07582	-0.485192
YAL056W	TFIID	-2.03919	-1.9963
YAL058W	TFIID	-1.77727	-1.29739
YAL059W	TFIID	-2.6149	-2.42106
YAL060W	CR	-1.4106	-2.07587
YAL061W		-0.183824	-0.0502725
YAL062W		-0.498756	-1.26099
YAL063C		-0.398868	-0.136131
YAL063C-A		-0.196457	-0.464281
YAL064C-A		-0.0160271	-0.334847
YAL064W		-0.0981566	-0.167053
YAL064W-B		-0.958128	-0.736035
YAL065C		-0.203734	-1.26939
YAL067C		-0.31192	-0.478405
YAL067W-A		-0.305914	-0.119454
YAL068C		-0.318066	-0.113491
YAR002C-A	TFIID	-2.10366	-1.63064
YAR002W	TFIID	-2.19768	-1.34319
YAR003W	TFIID	-2.33997	-1.65752
YAR007C	TFIID	-2.3002	-1.98604
YAR008W	TFIID	-2.25103	-2.03403
YAR009C		-0.197202	-0.640579
YAR010C		-0.162147	-0.115013
YAR014C	TFIID	-2.07911	-1.88004
YAR015W	TFIID	-2.0544	-2.03415
YAR018C	TFIID	-1.03328	-0.873821
YAR019C	TFIID	-2.31699	-1.69773
YAR020C		-0.189444	-0.649757
YAR023C		-1.55835	-1.49917
YAR027W	TFIID	-1.95534	-1.64377
YAR028W	TFIID	-1.9045	-1.31928
YAR029W		-0.727302	-0.274331
YAR031W		-0.382662	-0.594148
YAR033W		-2.24946	-1.78159
YAR035C-A		-1.56761	-1.41465
YAR035W		-0.66933	-0.152046
YAR042W	TFIID	-1.54432	-1.3884
YAR050W		-0.785787	0.271686
YAR064W		-0.481269	-1.3285
YAR066W		-0.379252	-1.28241
YAR068W		-0.269587	-0.299833
YAR071W		-1.76941	-1.57048
YBL001C	TFIID	-1.35336	-1.45597
YBL002W	CR	-0.0662429	-0.269561
YBL003C	CR	-0.109103	-0.279611
YBL004W	TFIID	-1.89921	-1.88312
YBL005W	TFIID	-1.49725	-1.17062
YBL005W-A		-0.35284	-0.460655
YBL005W-B		-0.35284	-0.460655
YBL006C	TFIID	-1.95064	-1.58875
YBL007C	TFIID	-1.84537	-1.06162
YBL008W	TFIID	-1.80942	-1.13917
YBL008W-A		-0.60048	-1.41105
YBL009W	TFIID	-2.11619	-2.16711
YBL010C	TFIID	-2.17169	-2.0282
YBL011W	TFIID	-1.76601	-2.33355
YBL013W	TFIID	-1.53827	-1.56427
YBL014C	TFIID	-1.6654	-1.77936
YBL015W	TFIID	-1.95878	-1.46261
YBL016W	TFIID	-1.46808	-1.44326
YBL017C	TFIID	-2.18881	-1.76405
YBL018C	TFIID	-2.05802	-1.44781
YBL019W	TFIID	-1.55689	-1.88617
YBL020W	TFIID	-2.37554	-1.97437
YBL021C	TFIID	-2.35134	-1.88217
YBL022C	TFIID	-2.08745	-1.28392
YBL023C	TFIID	-2.1798	-1.2902
YBL024W	TFIID	-2.14079	-1.91917
YBL025W	TFIID	-2.13897	-2.04181
YBL026W	TFIID	-2.08922	-1.67045
YBL027W	TFIID	-1.37736	-2.43402
YBL028C	TFIID	-2.59872	-2.12483
YBL029C-A	TFIID	-1.00531	-1.09767
YBL029W		-1.59636	-1.3921
YBL030C	CR	-0.283518	-0.0042898
YBL031W	TFIID	-1.98599	-1.10417
YBL032W	TFIID	-2.00775	-1.05275
YBL033C	CR	-0.363166	-0.792939
YBL034C	TFIID	-1.00061	-0.637613
YBL035C	TFIID	-0.8924	-1.24024
YBL036C	TFIID	-1.76341	-2.01124
YBL037W	TFIID	-2.25707	-1.66016
YBL038W	TFIID	-1.85054	-1.57251
YBL039C	TFIID	-1.992	-2.47766
YBL039W-B	TFIID	-2.09169	-1.5283
YBL040C	TFIID	-2.09271	-1.49709
YBL041W	TFIID	-1.5656	-1.55688
YBL042C	TFIID	-0.709028	-1.03541
YBL043W		-0.376138	-0.18702
YBL044W		-0.102604	-0.491529
YBL045C	TFIID	-0.171034	-0.577905
YBL046W	TFIID	-2.1434	-1.88437
YBL047C	TFIID	-2.22855	-1.8007
YBL049W		-0.544593	-0.371793
YBL050W	TFIID	-1.79147	-1.23828
YBL051C	TFIID	-1.73213	-1.30784
YBL052C	TFIID	-2.16737	-2.07122
YBL054W	TFIID	-1.81283	-2.33215
YBL055C	TFIID	-2.45802	-2.61992
YBL056W	TFIID	-2.26554	-1.87329
YBL057C	TFIID	-2.3144	-1.83779
YBL058W	TFIID	-1.91606	-1.21955
YBL059C-A	TFIID	-2.36204	-2.15832
YBL059W	TFIID	-2.38341	-2.12856
YBL060W	TFIID	-1.91983	-1.18438
YBL061C	TFIID	-1.73131	-1.9002
YBL063W	TFIID	-1.47158	-0.781994
YBL064C	CR	-0.717895	0.0394471
YBL066C	TFIID	-1.01322	-0.614222
YBL067C	TFIID	-1.95667	-2.35654
YBL068W	TFIID	-2.72739	-1.98264
YBL069W	TFIID	-1.75734	-1.7251
YBL071C-B		-1.3163	-1.76997
YBL071W-A		-1.26028	-1.46055
YBL072C	TFIID	-0.540027	-0.852649
YBL074C	TFIID	-0.179583	-0.332083
YBL075C	TFIID	-0.159546	-0.397031
YBL076C	TFIID	-1.42921	-1.7273
YBL078C	TFIID	-1.47117	-1.36273
YBL079W	TFIID	-2.23551	-1.68619
YBL080C	TFIID	-2.24781	-1.07969
YBL081W	TFIID	-2.29501	-1.60575
YBL082C	TFIID	-2.26878	-1.66514
YBL084C	TFIID	-2.00615	-1.37353
YBL085W	TFIID	-1.73674	-1.59581
YBL086C	TFIID	-1.58013	-1.22024
YBL087C	TFIID	-1.37395	-2.70591
YBL088C	TFIID	-1.75584	-1.3188
YBL089W	TFIID	-2.4721	-1.66412
YBL090W	TFIID	-2.60499	-1.63349
YBL091C	TFIID	-2.57671	-1.6976
YBL091C-A	TFIID	-1.19138	-1.02684
YBL092W	TFIID	-1.08193	-2.54492
YBL093C	TFIID	-1.90921	-2.11252
YBL095W	TFIID	-1.50971	-1.80934
YBL097W	TFIID	-2.1539	-2.01964
YBL098W		-0.624418	-0.313605
YBL099W	TFIID	-0.645936	-0.904478
YBL100W-A		-0.19572	-0.159449
YBL100W-B		-0.19572	-0.159449
YBL100W-C		-1.75504	-1.6622
YBL101C	TFIID	-1.42554	-1.7276
YBL102W	TFIID	-2.19103	-1.934
YBL103C	TFIID	-1.8734	-1.75175
YBL104C	TFIID	-1.94159	-1.12419
YBL105C	TFIID	-1.9744	-1.49734
YBL106C	CR	0.0258347	0.197349
YBL107C	TFIID	-2.188	-2.24192
YBL108C-A		-0.343409	0.197484
YBL111C		-0.753688	-0.104912
YBL112C		-0.616729	-0.114503
YBL113C		-0.5379	-0.238285
YBR001C	CR	-1.10709	-1.32939
YBR002C	TFIID	-2.05369	-1.67245
YBR003W	TFIID	-2.05267	-1.7181
YBR004C	TFIID	-2.15854	-1.71669
YBR005W	TFIID	-2.2349	-1.63007
YBR006W	TFIID	-0.888075	-0.436164
YBR007C	CR	-1.61765	-1.75435
YBR008C	CR	-0.975066	-1.12783
YBR009C	CR	-0.27662	-0.626818
YBR010W	CR	-0.2256	-0.507821
YBR011C	TFIID	-1.16604	-1.8386
YBR012W-A		-0.0896713	-0.293783
YBR012W-B		-0.0896713	-0.293783
YBR013C		-0.963108	-1.33028
YBR014C	TFIID	-1.712	-1.40258
YBR015C	TFIID	-2.08478	-1.92546
YBR016W	TFIID	-0.942792	-1.00255
YBR017C	TFIID	-1.92775	-1.47928
YBR018C		-0.648115	-0.646109
YBR019C		-0.428388	-0.285222
YBR020W		-0.237436	-0.218885
YBR021W		-1.58395	-2.00168
YBR022W	TFIID	-1.6885	-1.44769
YBR023C	TFIID	-2.08037	-1.90512
YBR024W	TFIID	-1.96877	-1.14607
YBR025C	TFIID	-1.15762	-2.49451
YBR026C	TFIID	-1.37264	-1.97588
YBR028C	TFIID	-1.42946	-1.58651
YBR029C	TFIID	-2.52049	-1.89596
YBR030W	TFIID	-2.50179	-1.97844
YBR031W	TFIID	-0.610217	-0.934117
YBR033W		-0.907044	-0.314845
YBR034C	TFIID	-1.62376	-1.60986
YBR035C	TFIID	-1.31304	-1.54926
YBR036C	TFIID	-2.20558	-1.54409
YBR037C	TFIID	-2.00491	-1.37673
YBR038W	TFIID	-1.35599	-1.52002
YBR039W	TFIID	-1.39032	-1.45524
YBR040W		-0.200244	-0.895792
YBR041W	TFIID	-1.33332	-1.77171
YBR042C	TFIID	-1.81403	-2.03487
YBR043C	TFIID	-2.35952	-1.25173
YBR044C	TFIID	-2.16023	-2.20411
YBR045C		-0.471151	-0.272498
YBR046C	CR	-1.96183	-1.46974
YBR047W	TFIID	-1.45974	-1.3027
YBR048W	CR	-1.17995	-2.14911
YBR049C	TFIID	-1.9784	-1.14512
YBR050C		-1.45212	-1.60726
YBR052C	TFIID	-1.02995	-1.65972
YBR053C	TFIID	-2.62549	-2.15932
YBR054W	CR	-0.971577	-1.36719
YBR055C	TFIID	-1.83355	-1.09012
YBR056W	TFIID	-0.620288	-0.135651
YBR056W-A	CR	-1.28089	-1.47935
YBR057C	TFIID	-2.23209	-1.9193
YBR058C	TFIID	-2.03613	-1.66082
YBR058C-A	TFIID	-2.20987	-1.97933
YBR059C	TFIID	-1.74688	-1.20001
YBR060C	TFIID	-2.79266	-2.39584
YBR061C	TFIID	-2.4631	-1.73034
YBR062C	TFIID	-1.66017	-1.31431
YBR063C	TFIID	-0.951202	-0.386069
YBR065C	TFIID	-2.09531	-2.02451
YBR066C	CR	-0.958312	-1.02275
YBR067C	TFIID	-1.08298	-1.36511
YBR068C	CR	-0.54456	-0.325928
YBR069C	CR	-0.909313	-1.32242
YBR070C	TFIID	-1.09516	-1.47157
YBR071W	CR	-0.480699	-0.641926
YBR072C-A		-1.10222	-1.09423
YBR072W		-0.160814	-0.506437
YBR073W	TFIID	-1.30041	-1.28916
YBR074W	TFIID	-1.76376	-1.7187
YBR076W		-0.235427	-0.160123
YBR077C	TFIID	-1.61986	-2.06714
YBR078W	CR	-0.311164	-0.66336
YBR079C	TFIID	-2.08321	-1.8995
YBR080C	TFIID	-2.23492	-1.57187
YBR081C		-1.29706	-1.32637
YBR082C	TFIID	-0.983095	-1.61308
YBR083W	CR	-0.544391	-0.809783
YBR084C-A	TFIID	-1.29286	-2.38232
YBR084W	TFIID	-2.0828	-1.95731
YBR085C-A	CR	-0.969287	-2.01497
YBR085W	TFIID	-0.88019	-0.526828
YBR086C	TFIID	-1.9342	-2.38086
YBR087W	TFIID	-2.29423	-2.06088
YBR088C	CR	-0.326232	-0.597607
YBR089C-A	TFIID	-1.15976	-1.22793
YBR090C		-0.949766	-0.450452
YBR091C	TFIID	-2.09682	-1.92259
YBR092C	CR	-1.57905	-1.68629
YBR093C	TFIID	-1.19198	-1.42204
YBR094W	TFIID	-2.07789	-1.55752
YBR095C	TFIID	-2.43014	-1.97942
YBR096W	TFIID	-2.40463	-1.93902
YBR097W	TFIID	-1.9391	-1.32748
YBR098W	TFIID	-1.80583	-1.33196
YBR101C	TFIID	-0.636877	-1.33674
YBR102C	TFIID	-2.29008	-1.54982
YBR103W	TFIID	-2.42899	-1.8231
YBR104W	TFIID	-2.07096	-2.05554
YBR105C	TFIID	-0.642174	-1.41613
YBR106W	TFIID	-0.710424	-1.5531
YBR107C	TFIID	-2.40562	-1.80602
YBR108W	TFIID	-2.70325	-1.71548
YBR109C	TFIID	-2.09641	-1.67022
YBR110W	TFIID	-1.99254	-1.37175
YBR111C	TFIID	-2.1817	-1.88408
YBR111W-A	TFIID	-2.70516	-1.89854
YBR112C	TFIID	-0.877363	-2.2213
YBR114W	TFIID	-1.25364	-1.20665
YBR115C
YBR117C		-1.09928	-1.01413
YBR118W	CR	-0.430703	-0.732176
YBR119W	TFIID	-0.66022	-1.63306
YBR120C	TFIID	-2.52803	-1.70764
YBR121C	TFIID	-2.28699	-1.91928
YBR122C	TFIID	-2.14151	-1.46737
YBR123C	TFIID	-1.90885	-1.41531
YBR125C	TFIID	-2.16627	-2.25279
YBR126C	CR	-1.14831	-1.28918
YBR126W-A		-1.12129	-1.47166
YBR127C	TFIID	-2.04898	-1.79233
YBR128C	TFIID	-0.957922	-1.56402
YBR129C	TFIID	-2.20161	-2.04369
YBR130C	TFIID	-2.27191	-1.17852
YBR131W	TFIID	-2.43759	-1.25823
YBR132C	CR	-0.652107	-0.783706
YBR133C	TFIID	-2.26501	-1.45153
YBR135W	TFIID	-1.64785	-1.41399
[truncated: 5,552 more rows]
