# Supplementary material for: BET family members Bdf1/2 modulate global transcription initiation and elongation in Saccharomyces cerevisiae
Source: eLife. 2021 Jun 17;10:e69619. doi: 10.7554/eLife.69619 (PMC8266393; doi:10.7554/eLife.69619)
Supplement: Supplementary file 4. — Related to Figure 6. [file elife-69619-supp4.xlsx]

## Sheet: index
5A	Summary of Rpb1 ChIP-seq experiments in Bdf1/2 degron strain. 4615 analyzed genes are sorted by dependence on Bdf1/2 as measured by RNA-seq and divided into quintiles (column 'rank'). Log2 change in total Rpb1, normalized S5P signal and normalized S2P signal is shown in columns 'Pol2_total', 'Pol2_S5P', 'Pol2_S2P', respectively. Columns 'TR_DMSO' and 'TR_IAA' show traveling ratio in DMSO and IAA …
5B	Summary of Rpb1 ChIP-seq experiments in Taf1 degron strain. 4615 analyzed genes are sorted by dependence on Taf1 as measured by RNA-seq and divided into quintiles (column 'rank'). Log2 change in total Rpb1, normalized S5P signal and normalized S2P signal is shown in columns 'Pol2_total', 'Pol2_S5P', 'Pol2_S2P', respectively. Columns 'TR_DMSO' and 'TR_IAA' show traveling ratio in DMSO and IAA trea…
5C	Log2 change in Bur1, Ctk1 and Spt5 gene occupancy relative to the change in Rpb1 level after depleting Bdf1/2. 4615 analyzed genes are sorted by dependence on Bdf1/2 as measured by RNA-seq and divided into quintiles (column 'rank').

## Sheet: 5A
gene_id	gene_name	class	TATA	rank	Pol2_total	Pol2_S5P	Pol2_S2P	TR_DMSO	TR_IAA	TR_change
YJL088W	ARG3	CR	TATA-containing	1	0.18	0.12	-0.779	0.383	0.394	0.04
YJL133C-A	YJL133C-A	CR	TATA-containing	1	0.013	0.01	-0.361	0.61	0.478	-0.352
YNL251C	NRD1	CR	TATA-containing	1	0.189	0.157	0.682	7.384	2.467	-1.582
YER081W	SER3	CR	TATA-containing	1	0.446	0.176	0.493	8.26	2.933	-1.494
YNL135C	FPR1	CR	TATA-less	1	-1.549	-0.441	1.602	0.675	1.134	0.748
YJR009C	TDH2	CR	TATA-containing	1	0.759	-0.021	0.45	0.451	0.3	-0.591
YGR008C	STF2	CR		1	-0.414	0.355	0.12	0.329	0.325	-0.018
YMR194C-B	CMC4	CR		1	-0.189	-0.082	0.532	0.202	0.293	0.54
YGR254W	ENO1	CR	TATA-containing	1	0.513	0.088	0.447	0.579	0.43	-0.43
YER067W	RGI1	CR		1	-0.852	0.165	0.06	0.667	0.465	-0.52
YJL052W	TDH1	CR	TATA-containing	1	0.787	0.115	0.375	0.44	0.283	-0.636
YHR018C	ARG4	CR	TATA-containing	1	0.033	0.124	0.111	0.498	0.425	-0.228
YKL086W	SRX1	CR	TATA-containing	1	0.003	0.211	-1.323	0.96	0.653	-0.556
YCL040W	GLK1	CR	TATA-containing	1	0.4	0.065	0.437	0.916	0.739	-0.309
YMR195W	ICY1	CR	TATA-containing	1	-0.176	0.073	0.434	0.718	0.515	-0.479
YPL250C	ICY2	CR	TATA-containing	1	-0.136	0.147	0.282	0.419	0.249	-0.751
YMR251W-A	HOR7	CR	TATA-containing	1	-0.177	0.134	0.697	0.583	0.441	-0.402
YJR109C	CPA2	CR	TATA-less	1	0.169	0.107	-0.104	0.496	0.536	0.112
YPR036W-A	SPO24	CR	TATA-containing	1	-0.049	0.13	0.673	0.425	0.329	-0.369
YER053C	PIC2	CR	TATA-less	1	-0.284	0.079	-0.016	0.479	0.221	-1.115
YOL058W	ARG1	CR	TATA-less	1	-0.359	0.007	-0.44	0.671	0.506	-0.407
YPL014W	YPL014W	CR	TATA-containing	1	0.115	0.119	0.152	0.538	0.436	-0.305
YML128C	MSC1	CR	TATA-less	1	-0.168	0.025	0.024	0.317	0.306	-0.054
YMR090W	YMR090W	CR		1	-0.817	0.149	-0.246	0.567	0.174	-1.706
YNL208W	YNL208W	CR	TATA-less	1	-0.294	0.186	0.289	0.392	0.289	-0.439
YOR374W	ALD4	CR	TATA-containing	1	-0.13	0.313	0.109	0.361	0.298	-0.279
YDL125C	HNT1	CR	TATA-less	1	-0.126	0.037	0.666	0.784	0.807	0.041
YOL086C	ADH1	CR	TATA-containing	1	0.241	0.022	0.497	0.437	0.321	-0.447
YKL152C	GPM1	CR	TATA-less	1	0.281	0.16	0.605	0.553	0.418	-0.404
YNL289W	PCL1	CR	TATA-containing	1	0.036	0.071	0.24	0.433	0.306	-0.498
YML100W	TSL1	CR	TATA-containing	1	0.227	0.191	0.334	0.246	0.196	-0.329
YGR161W-C	YGR161W-C	TFIID	TATA-less	1	0.124	-0.065	0.443	0.329	0.241	-0.452
YFL021W	GAT1	CR	TATA-containing	1	0.046	0.023	-0.104	0.997	0.628	-0.666
YBL064C	PRX1	CR	TATA-containing	1	-0.663	-0.003	-0.191	0.545	0.239	-1.189
YDR050C	TPI1	CR	TATA-less	1	0.245	0.101	0.574	0.568	0.372	-0.608
YOR161C	PNS1	CR		1	-0.108	0.194	0.161	0.826	0.517	-0.674
YNL030W	HHF2	CR	TATA-containing	1	-0.302	0.243	0.701	0.49	0.405	-0.273
YGR209C	TRX2	CR	TATA-containing	1	-0.37	0.116	0.095	0.466	0.388	-0.261
YOL123W	HRP1	CR		1	-0.393	0.182	0.539	3.436	1.818	-0.919
YMR062C	ARG7	TFIID	TATA-containing	1	-0.299	0.132	-0.44	0.583	0.293	-0.993
YGL117W	YGL117W	CR	TATA-containing	1	-0.99	0.417	0.031	0.507	0.589	0.217
YBR230C	OM14	CR	TATA-containing	1	-0.488	0.057	-0.102	0.466	0.488	0.067
YJL151C	SNA3	CR	TATA-containing	1	-0.695	0.097	0.468	0.431	0.345	-0.323
YDL070W	BDF2	CR	TATA-containing	1	-0.043	0.292	0.562	2.689	2.32	-0.213
YER150W	SPI1	CR	TATA-containing	1	-0.515	0.402	-0.265	0.748	0.403	-0.89
YMR105C	PGM2	CR		1	-0.15	0.246	0.291	0.475	0.301	-0.658
YDL198C	GGC1	CR	TATA-less	1	-0.813	0.146	-0.041	1.025	0.423	-1.278
YIL136W	OM45	TFIID	TATA-containing	1	-0.328	0.259	0.027	0.488	0.266	-0.876
YDR043C	NRG1	CR	TATA-containing	1	-0.125	0.205	0.294	0.295	0.284	-0.054
YER159C	BUR6	CR	TATA-less	1	-0.337	0.022	0.245	0.177	0.225	0.351
YCR018C	SRD1	CR		1	-0.532	0.247	0.568	0.428	0.288	-0.57
YML028W	TSA1	CR	TATA-containing	1	0.13	0.021	0.378	0.612	0.409	-0.583
YGL224C	SDT1	CR	TATA-containing	1	-0.9	0.136	0.299	0.217	0.139	-0.643
YPL058C	PDR12	CR	TATA-less	1	0.288	0.164	0.091	0.562	0.267	-1.073
YNL031C	HHT2	CR	TATA-containing	1	-0.134	0.218	0.603	0.495	0.363	-0.446
YJR104C	SOD1	CR	TATA-containing	1	-0.041	0.107	0.408	0.378	0.272	-0.474
YER055C	HIS1	CR	TATA-less	1	-0.122	0.122	0.142	0.375	0.247	-0.603
YOR052C	TMC1	CR	TATA-containing	1	-0.361	0.18	0.543	0.332	0.287	-0.211
YLR399C	BDF1	CR	TATA-less	1	0.031	0.149	0.53	3.545	3.918	0.144
YGL037C	PNC1	CR	TATA-containing	1	-0.435	0.082	0.64	0.259	0.185	-0.48
YBR009C	HHF1	CR	TATA-containing	1	-0.326	0.178	0.532	0.409	0.326	-0.324
YLR194C	YLR194C	CR	TATA-containing	1	-0.63	0.012	0.072	0.645	0.4	-0.692
YMR122W-A	YMR122W-A	CR	TATA-containing	1	-0.368	0.154	0.605	0.495	0.357	-0.471
YOR247W	SRL1	CR	TATA-less	1	0.069	0.26	0.416	0.431	0.287	-0.589
YNL300W	TOS6	CR	TATA-containing	1	0.068	-0.017	0.029	0.419	0.293	-0.514
YDR513W	GRX2	CR	TATA-containing	1	-0.899	0.222	0.166	0.326	0.323	-0.014
YDR533C	HSP31	CR	TATA-containing	1	-0.96	0.236	-0.215	0.459	0.359	-0.355
YNL301C	RPL18B	CR	TATA-less	1	-0.97	0.247	0.678	0.703	0.437	-0.686
YBR256C	RIB5	CR	TATA-containing	1	-1.311	0.277	-0.072	0.603	0.599	-0.009
YCL025C	AGP1	CR	TATA-containing	1	-0.114	0.179	0.199	0.613	0.401	-0.61
YCR012W	PGK1	CR	TATA-containing	1	0.261	0.102	0.567	0.504	0.403	-0.323
YPL265W	DIP5	CR	TATA-containing	1	-0.21	0.239	0.337	1.093	0.681	-0.683
YLR327C	TMA10	CR		1	-0.954	-0.065	-0.318	0.145	0.173	0.256
YKL060C	FBA1	CR	TATA-containing	1	0.275	0.131	0.559	0.432	0.307	-0.494
YOL109W	ZEO1	CR	TATA-containing	1	-0.351	0.234	0.699	0.444	0.34	-0.384
YLR044C	PDC1	CR	TATA-containing	1	0.083	0.051	0.562	0.505	0.305	-0.724
YDR276C	PMP3	CR	TATA-containing	1	-0.357	0.131	0.522	0.412	0.342	-0.269
YBR145W	ADH5	CR	TATA-containing	1	-0.684	-0.108	-0.596	0.479	0.661	0.465
YBL030C	PET9	CR	TATA-containing	1	-0.675	0.251	0.186	0.386	0.478	0.307
YBL003C	HTA2	CR	TATA-containing	1	-0.129	0.186	0.637	0.818	0.578	-0.501
YPL004C	LSP1	CR	TATA-containing	1	-0.198	0.231	0.466	0.496	0.4	-0.309
YDR353W	TRR1	CR	TATA-less	1	-0.392	0.265	0.277	0.548	0.426	-0.364
YDR453C	TSA2	CR	TATA-less	1	-1.227	0.231	0.035	0.538	0.581	0.112
YGR086C	PIL1	CR	TATA-containing	1	-0.111	0.22	0.511	0.366	0.359	-0.027
YOR382W	FIT2	CR	TATA-less	1	-0.367	-0.011	-0.271	0.659	0.422	-0.643
YLR136C	TIS11	CR	TATA-containing	1	-0.442	0.116	0.482	0.691	0.47	-0.556
YOR152C	YOR152C	CR		1	-0.399	0.122	0.343	1.493	1.432	-0.061
YER177W	BMH1	CR	TATA-less	1	-0.134	0.134	0.655	0.512	0.391	-0.39
YBR088C	POL30	CR	TATA-containing	1	-0.255	0.192	0.315	0.53	0.387	-0.455
YML087C	AIM33	CR	TATA-less	1	-2.155	0.079	-0.68	1.402	1.193	-0.233
YDR155C	CPR1	CR	TATA-containing	1	-0.328	0.224	0.669	0.415	0.278	-0.58
YDL184C	RPL41A	TFIID	TATA-less	1	-0.942	0.117	0.526	0.701	0.568	-0.304
YHR162W	MPC2	CR	TATA-less	1	-0.544	0.155	0.678	0.468	0.316	-0.565
YDR073W	SNF11	CR	TATA-containing	1	-0.385	0.105	0.282	1.015	0.736	-0.464
YDL022W	GPD1	CR	TATA-containing	1	0.057	0.128	0.394	0.327	0.276	-0.245
YIL155C	GUT2	CR	TATA-less	1	-0.365	0.049	-0.317	1.512	0.591	-1.354
YLR304C	ACO1	CR	TATA-containing	1	0.05	0.128	0.493	0.561	0.372	-0.594
YEL034W	HYP2	CR	TATA-containing	1	-0.362	0.192	0.661	0.499	0.288	-0.793
YBR066C	NRG2	CR	TATA-containing	1	-0.914	0.682	0.144	0.458	0.42	-0.126
YEL044W	IES6	TFIID	TATA-less	1	-1.118	-0.082	-0.08	0.392	0.498	0.344
YDL110C	TMA17	CR	TATA-containing	1	-0.948	0.286	0.327	0.459	0.32	-0.521
YHR008C	SOD2	CR	TATA-containing	1	-0.405	0.041	0.337	0.537	0.442	-0.282
YIL051C	MMF1	CR	TATA-containing	1	-0.683	0.314	0.616	0.394	0.283	-0.478
YOR226C	ISU2	CR	TATA-less	1	-0.659	0.22	0.409	0.51	0.333	-0.613
YLR205C	HMX1	TFIID	TATA-less	1	-0.727	0.233	-0.401	0.657	0.456	-0.525
YBL002W	HTB2	CR	TATA-containing	1	0.067	0.091	0.439	0.617	0.508	-0.28
YHR174W	ENO2	CR	TATA-less	1	0.252	0.04	0.537	0.552	0.362	-0.607
YDR032C	PST2	CR	TATA-containing	1	-1.478	0.048	-0.102	0.444	0.414	-0.101
YGR192C	TDH3	CR	TATA-containing	1	0.197	0.048	0.553	0.473	0.306	-0.629
YHR137W	ARO9	CR	TATA-containing	1	-0.281	0.121	-0.14	0.941	0.993	0.078
YDL133C-A	RPL41B	TFIID	TATA-containing	1	-0.894	0.273	0.372	0.865	0.746	-0.215
YKR076W	ECM4	CR		1	-1.023	0.325	-0.054	0.371	0.381	0.037
YOR303W	CPA1	CR		1	0.08	0.043	0.075	0.463	0.399	-0.215
YDR524C-B	YDR524C-B	CR	TATA-containing	1	-0.413	0.202	0.905	0.597	0.436	-0.452
YNL037C	IDH1	CR	TATA-containing	1	-0.125	0.157	0.505	0.873	0.734	-0.251
YKL150W	MCR1	CR	TATA-containing	1	-0.59	0.154	-0.009	0.512	0.405	-0.338
YJL079C	PRY1	CR	TATA-less	1	-0.464	-0.066	0.437	1.008	0.922	-0.128
YJR048W	CYC1	CR	TATA-containing	1	-1.471	0.37	-0.437	0.918	0.645	-0.51
YJL016W	YJL016W	CR		1	-0.083	0.146	-0.089	1.294	0.546	-1.244
YBR010W	HHT1	CR	TATA-containing	1	-0.383	0.239	0.545	0.506	0.407	-0.312
YPR167C	MET16	TFIID	TATA-containing	1	-1.868	-0.044	-0.491	0.392	0.468	0.259
YGR052W	FMP48	CR		1	-0.197	0.139	-0.049	0.68	0.415	-0.714
YNL036W	NCE103	CR	TATA-containing	1	-0.739	0.187	0.396	0.724	0.325	-1.154
YOR292C	YOR292C	TFIID	TATA-less	1	-0.878	0.029	-0.225	0.353	0.218	-0.694
YHR199C	AIM46	CR	TATA-less	1	-1.593	-0.015	0.125	0.635	0.437	-0.537
YAL038W	CDC19	CR	TATA-less	1	0.128	0.114	0.554	0.745	0.582	-0.355
YFR053C	HXK1	CR	TATA-containing	1	-0.258	0.159	0.207	0.383	0.293	-0.386
YKL051W	SFK1	CR	TATA-less	1	-0.951	0.313	0.413	0.681	0.436	-0.642
YER069W	ARG5,6	CR	TATA-less	1	-0.41	0.038	-0.389	0.445	0.451	0.019
YIR017C	MET28	CR	TATA-less	1	-0.5	0.036	-0.168	0.353	0.355	0.009
YNL231C	PDR16	CR	TATA-containing	1	-0.288	0.247	0.498	0.395	0.241	-0.713
YDR055W	PST1	CR	TATA-containing	1	-0.324	0.167	0.221	0.695	0.422	-0.72
YPL075W	GCR1	CR	TATA-less	1	-0.014	0.232	0.305	0.779	0.341	-1.194
YHR071W	PCL5	CR	TATA-containing	1	-0.186	0.204	0.241	0.599	0.352	-0.765
YJL191W	RPS14B	CR	TATA-containing	1	-0.855	0.208	0.888	1.75	0.851	-1.04
YAL060W	BDH1	CR	TATA-containing	1	-0.231	-0.366	0.555	0.939	0.652	-0.526
YLL039C	UBI4	CR	TATA-containing	1	-0.26	0.315	0.362	0.424	0.235	-0.854
YPL111W	CAR1	CR	TATA-containing	1	-0.544	0.149	0.169	0.768	0.551	-0.48
YOR062C	YOR062C	CR		1	-0.57	0.192	0.264	0.709	0.77	0.118
YEL060C	PRB1	CR	TATA-containing	1	-0.366	0.137	0.082	0.486	0.45	-0.114
YPL156C	PRM4	CR	TATA-containing	1	-0.443	0.306	0.211	0.624	0.375	-0.735
YBR126C	TPS1	CR	TATA-containing	1	-0.052	0.083	0.403	0.656	0.455	-0.529
YOR136W	IDH2	CR	TATA-containing	1	-0.01	0.213	0.511	0.568	0.393	-0.532
YLR109W	AHP1	CR	TATA-containing	1	-0.303	0.028	0.713	0.467	0.269	-0.794
YCL030C	HIS4	CR	TATA-containing	1	-0.519	0.055	-0.387	1.065	0.425	-1.326
YDL124W	YDL124W	CR	TATA-containing	1	-0.119	0.246	0.461	0.357	0.236	-0.6
YDR380W	ARO10	CR		1	-1.452	0.084	-0.256	1.053	0.748	-0.494
YJL078C	PRY3	CR	TATA-less	1	-0.435	0.048	0.171	0.961	0.651	-0.562
YMR002W	MIX17	CR	TATA-containing	1	-0.43	0.039	0.361	0.426	0.366	-0.221
YER028C	MIG3	CR	TATA-containing	1	-0.763	0.015	-0.683	0.808	0.887	0.134
YPL135W	ISU1	CR	TATA-containing	1	-0.432	0.146	0.57	0.466	0.294	-0.666
YFR033C	QCR6	CR	TATA-less	1	-0.682	0.109	0.195	0.691	0.555	-0.317
YMR291W	TDA1	CR	TATA-less	1	-0.288	0.139	0.272	0.429	0.391	-0.132
YBL033C	RIB1	CR	TATA-containing	1	-0.443	0.032	0.013	0.597	0.358	-0.738
YDL182W	LYS20	CR	TATA-containing	1	-0.667	0.151	0.291	0.613	0.453	-0.435
YLR437C	DIF1	TFIID	TATA-less	1	-0.832	0.126	0.149	0.873	0.534	-0.708
YNL241C	ZWF1	CR		1	-0.089	0.12	0.249	0.5	0.394	-0.342
YLL027W	ISA1	CR	TATA-less	1	-0.478	0.145	0.239	0.488	0.32	-0.608
YLR075W	RPL10	CR	TATA-containing	1	-0.557	0.198	0.713	0.409	0.272	-0.59
YGR295C	COS6	CR	TATA-containing	1	-0.849	0.22	0.275	0.81	0.475	-0.77
YML058W	SML1	CR	TATA-containing	1	-0.708	0.212	0.562	0.829	0.584	-0.506
YPL177C	CUP9	CR	TATA-less	1	-0.851	0.226	0.395	0.508	0.459	-0.148
YOR120W	GCY1	TFIID		1	-1.08	0.111	0.343	0.19	0.101	-0.911
YER035W	EDC2	CR	TATA-containing	1	-0.681	0.19	0.329	0.471	0.28	-0.752
YPR138C	MEP3	CR	TATA-containing	1	-0.137	0.146	0.4	0.449	0.533	0.248
YKL035W	UGP1	CR	TATA-containing	1	-0.108	0.184	0.379	0.464	0.39	-0.251
YDR397C	NCB2	CR	TATA-containing	1	-0.639	0.148	0.187	0.426	0.269	-0.66
YHR097C	YHR097C	TFIID	TATA-less	1	-0.808	0.309	-0.196	0.409	0.31	-0.399
YPR149W	NCE102	CR	TATA-containing	1	-0.289	0.207	0.56	0.466	0.315	-0.569
YBR085C-A	YBR085C-A	CR	TATA-containing	1	-0.665	0.187	0.113	0.603	0.487	-0.306
YNL055C	POR1	CR	TATA-less	1	-0.642	0.158	0.361	0.377	0.289	-0.386
YOL151W	GRE2	CR	TATA-containing	1	-0.207	0.094	0.172	0.515	0.467	-0.142
YLR355C	ILV5	CR	TATA-containing	1	-0.275	0.103	0.498	0.502	0.372	-0.431
YOL119C	MCH4	CR	TATA-less	1	-0.822	0.13	-0.338	0.893	0.966	0.113
YJL158C	CIS3	CR	TATA-containing	1	-0.445	0.075	0.55	0.368	0.261	-0.498
YNL134C	YNL134C	CR	TATA-less	1	-0.26	0.097	0.146	0.396	0.309	-0.359
YBR249C	ARO4	CR	TATA-less	1	-0.839	-0.041	-0.167	0.654	0.512	-0.352
YOR273C	TPO4	CR	TATA-containing	1	-0.375	0.038	-0.022	0.471	0.425	-0.147
YLR110C	CCW12	CR	TATA-containing	1	-0.102	-0.039	0.721	0.494	0.388	-0.351
YOR375C	GDH1	CR	TATA-containing	1	-0.742	0.099	0.117	0.431	0.275	-0.647
YGL209W	MIG2	CR	TATA-containing	1	-0.491	0.09	0.441	0.756	0.462	-0.71
YDR529C	QCR7	TFIID	TATA-less	1	-1.219	0.36	0.509	0.554	0.233	-1.251
YDR074W	TPS2	CR	TATA-less	1	-0.199	0.162	0.379	0.27	0.14	-0.949
YKL103C	APE1	CR		1	-0.661	0.112	0.092	0.592	0.743	0.328
YDL179W	PCL9	CR	TATA-less	1	-0.763	0.219	0.041	0.428	0.496	0.213
YEL007W	MIT1	CR	TATA-less	1	-0.394	0.247	0.414	0.345	0.207	-0.737
YDR158W	HOM2	CR	TATA-less	1	-0.529	0.117	0.195	0.782	0.41	-0.932
YPL163C	SVS1	CR	TATA-less	1	-0.456	0.248	-0.012	0.702	0.273	-1.366
YLR414C	PUN1	CR	TATA-containing	1	-0.743	0.175	0.436	0.248	0.239	-0.053
YIL121W	QDR2	CR	TATA-containing	1	-0.539	0.252	0.104	0.596	0.431	-0.469
YDR528W	HLR1	CR	TATA-containing	1	-0.339	0.174	0.074	0.406	0.278	-0.544
YDL020C	RPN4	CR	TATA-containing	1	-0.431	0.199	0.402	0.657	0.593	-0.149
YLR258W	GSY2	CR	TATA-containing	1	-0.401	0.208	0.224	0.398	0.249	-0.675
YER070W	RNR1	CR	TATA-containing	1	-0.006	0.153	0.423	0.824	0.528	-0.642
YPR145W	ASN1	CR	TATA-less	1	-0.486	0.133	0.349	0.635	0.454	-0.485
YMR250W	GAD1	CR	TATA-less	1	-0.677	0.141	0.047	0.866	0.506	-0.774
YBR157C	ICS2	CR	TATA-containing	1	-0.746	0.224	0.403	0.579	0.561	-0.046
YPR035W	GLN1	CR	TATA-containing	1	-0.287	0.07	0.442	0.543	0.429	-0.34
YIL053W	GPP1	CR	TATA-containing	1	-0.045	0.19	0.642	0.627	0.449	-0.483
YPL267W	ACM1	CR	TATA-containing	1	-0.827	0.292	-0.076	0.397	0.27	-0.556
YDR001C	NTH1	CR	TATA-containing	1	-0.306	0.235	0.309	0.545	0.465	-0.228
YKL087C	CYT2	TFIID	TATA-containing	1	-1.842	0.274	0.09	0.546	0.366	-0.577
YPL189C-A	COA2	TFIID	TATA-containing	1	-1.207	-0.093	-0.472	0.516	0.33	-0.642
YHR104W	GRE3	CR	TATA-containing	1	-1.057	0.03	0.09	0.593	0.602	0.022
YGL062W	PYC1	CR		1	-0.556	0.171	0.004	0.364	0.303	-0.263
YCL026C-B	HBN1	CR		1	-0.469	-0.007	-0.684	0.252	0.186	-0.438
YMR256C	COX7	TFIID	TATA-less	1	-1.68	0.181	-0.391	0.488	0.653	0.421
YBL045C	COR1	TFIID	TATA-less	1	-0.719	0.202	0.119	0.577	0.444	-0.378
YER130C	COM2	CR	TATA-containing	1	-0.623	0.309	0.243	0.582	0.352	-0.727
YIL111W	COX5B	CR	TATA-containing	1	-1.156	0.354	-0.12	0.6	0.357	-0.747
YLL041C	SDH2	CR	TATA-containing	1	-1.252	0.198	-0.326	0.613	0.506	-0.276
YKL085W	MDH1	CR	TATA-containing	1	-0.663	0.021	0.036	0.836	0.652	-0.359
YJL166W	QCR8	TFIID	TATA-less	1	-1.448	0.025	0.094	0.581	0.422	-0.461
YDR451C	YHP1	CR	TATA-containing	1	-0.741	0.112	0.434	0.303	0.285	-0.085
YBR071W	YBR071W	CR	TATA-less	1	-0.579	0.156	0.163	0.533	0.36	-0.567
YNR001C	CIT1	CR	TATA-containing	1	-0.517	0.151	0.126	0.531	0.325	-0.709
YLR297W	YLR297W	CR	TATA-containing	1	-1.233	0.355	0.146	0.174	0.284	0.704
YPR028W	YOP1	CR	TATA-less	1	-0.789	0.236	0.252	0.503	0.43	-0.225
YDR022C	ATG31	TFIID	TATA-less	1	-0.718	0.192	-0.207	0.668	0.977	0.549
YKR013W	PRY2	CR	TATA-containing	1	-0.318	-0.028	0.066	0.466	0.316	-0.561
YJL159W	HSP150	CR	TATA-containing	1	-0.294	-0.01	0.478	0.335	0.223	-0.586
YKL096W-A	CWP2	CR	TATA-containing	1	-0.465	0.047	0.747	0.627	0.462	-0.44
YNL104C	LEU4	CR	TATA-containing	1	-0.362	0.171	0.151	0.649	0.642	-0.017
YDR322C-A	TIM11	TFIID	TATA-containing	1	-1.763	0.339	-0.405	0.519	0.44	-0.238
YKR077W	MSA2	CR	TATA-less	1	-0.469	0.16	-0.173	0.621	0.498	-0.317
YDL055C	PSA1	CR	TATA-containing	1	-0.116	0.156	0.537	0.702	0.534	-0.393
YHR001W-A	QCR10	TFIID	TATA-less	1	-2.11	0.318	0.04	0.557	0.715	0.359
YML091C	RPM2	CR	TATA-less	1	-0.866	0.359	-0.059	0.404	0.467	0.21
YDL003W	MCD1	CR	TATA-containing	1	-0.139	0.157	0.07	0.427	0.278	-0.621
YKL164C	PIR1	CR	TATA-containing	1	-0.043	-0.043	0.242	0.494	0.364	-0.441
YML052W	SUR7	CR	TATA-less	1	-0.567	0.072	0.325	0.616	0.313	-0.974
YMR173W	DDR48	CR	TATA-less	1	0.1	0.207	0.279	0.384	0.238	-0.691
YDR225W	HTA1	CR	TATA-containing	1	-0.85	0.22	0.526	0.44	0.335	-0.391
YJL026W	RNR2	CR	TATA-containing	1	-0.431	0.034	0.017	0.838	0.468	-0.839
YDR525W-A	SNA2	TFIID	TATA-less	1	-0.649	-0.133	0.315	1.019	0.625	-0.705
YKR052C	MRS4	CR	TATA-containing	1	-0.807	0.15	0.105	0.636	0.459	-0.472
YBR196C	PGI1	CR	TATA-containing	1	-0.003	0.13	0.508	1.052	0.677	-0.636
YDR487C	RIB3	CR	TATA-containing	1	-1.347	0.292	-0.1	0.653	0.22	-1.571
YCL064C	CHA1	CR	TATA-containing	1	-0.682	0.227	0.446	0.508	0.323	-0.653
YKR061W	KTR2	CR	TATA-containing	1	-0.797	0.138	0.445	0.166	0.103	-0.69
YBR068C	BAP2	CR	TATA-containing	1	-0.54	0.151	0.559	0.654	0.5	-0.387
YER052C	HOM3	CR	TATA-containing	1	-0.307	0.161	-0.066	0.594	0.541	-0.134
YMR205C	PFK2	CR	TATA-containing	1	-0.11	0.254	0.443	0.978	0.738	-0.405
YCR005C	CIT2	CR	TATA-containing	1	-0.242	0.191	0.429	0.495	0.387	-0.354
YGR183C	QCR9	TFIID	TATA-less	1	-1.308	-0.036	-0.141	0.739	0.326	-1.18
YBL015W	ACH1	TFIID	TATA-containing	1	-1.393	0.001	-1.24	0.752	1.046	0.477
YPL061W	ALD6	CR	TATA-containing	1	-0.417	0.062	0.492	0.453	0.298	-0.607
YOR264W	DSE3	CR	TATA-less	1	-0.502	0.228	0.341	0.303	0.147	-1.044
YLR346C	YLR346C	CR	TATA-containing	1	-0.859	0.064	-0.017	0.395	0.311	-0.347
YEL017C-A	PMP2	CR	TATA-less	1	-0.66	0.115	0.356	0.73	0.548	-0.415
YMR070W	MOT3	CR	TATA-less	1	-0.578	0.056	0.201	0.457	0.311	-0.557
YBR244W	GPX2	CR	TATA-containing	1	-0.826	0.351	0.252	0.422	0.45	0.092
YDR247W	VHS1	CR	TATA-less	1	-0.403	0.053	-0.012	0.476	0.461	-0.047
YIL108W	YIL108W	CR	TATA-containing	1	-1.257	0.079	-0.2	0.986	0.584	-0.755
YAL040C	CLN3	CR	TATA-less	1	-0.483	0.198	0.397	0.645	0.506	-0.349
YGR161C	RTS3	CR	TATA-containing	1	-0.661	0.21	0.338	0.538	0.503	-0.097
YIL056W	VHR1	CR	TATA-containing	1	-0.332	0.011	0.052	0.916	0.761	-0.268
YFR032C-A	RPL29	TFIID	TATA-less	1	-0.849	0.144	0.669	0.382	0.233	-0.716
YFL031W	HAC1	CR	TATA-less	1	-0.116	0.151	0.442	0.729	0.446	-0.711
YHL040C	ARN1	CR	TATA-less	1	-0.338	0.182	0.165	0.814	0.541	-0.59
YMR038C	CCS1	CR	TATA-less	1	-0.957	0.201	0.335	0.493	0.421	-0.229
YGL012W	ERG4	CR	TATA-containing	1	-0.59	0.425	0.262	0.377	0.421	0.161
YPR080W	TEF1	CR	TATA-less	1	-0.534	0.126	0.563	0.495	0.34	-0.543
YML131W	YML131W	CR	TATA-containing	1	-0.548	0.17	-0.574	0.536	0.399	-0.428
YDL227C	HO	CR	TATA-less	1	-0.428	-0.001	-0.048	0.465	0.495	0.092
YOL011W	PLB3	CR	TATA-containing	1	-0.077	0.179	0.398	0.875	0.399	-1.13
YPR156C	TPO3	CR	TATA-less	1	-0.512	0.042	0.151	1.042	0.737	-0.499
YML007W	YAP1	CR	TATA-less	1	-1.001	0.249	0.254	0.716	0.528	-0.441
YLR027C	AAT2	CR	TATA-containing	1	-0.537	0.122	0.256	0.411	0.385	-0.093
YBR105C	VID24	TFIID	TATA-containing	1	-0.934	0.187	0.159	0.483	0.376	-0.364
YBR139W	YBR139W	CR	TATA-containing	1	-0.586	0.13	-0.008	0.354	0.234	-0.594
YDR381W	YRA1	CR	TATA-containing	1	-0.11	0.234	0.647	0.682	0.411	-0.731
YIL116W	HIS5	CR	TATA-containing	1	-1.382	-0.192	-0.075	0.509	1.314	1.369
YBR106W	PHO88	TFIID	TATA-containing	1	-0.707	0.099	0.35	0.295	0.22	-0.425
YLR452C	SST2	CR	TATA-less	1	-0.427	0.207	0.349	0.726	0.457	-0.666
YLR367W	RPS22B	TFIID		1	-0.825	0.248	0.693	0.477	0.24	-0.989
YKL067W	YNK1	TFIID	TATA-containing	1	-1.209	0.046	0.086	0.465	0.251	-0.886
YCR024C-A	PMP1	CR	TATA-containing	1	-0.532	0.133	0.695	0.298	0.265	-0.171
YDR345C	HXT3	CR	TATA-containing	1	-0.578	0.222	0.426	0.475	0.347	-0.455
YDL127W	PCL2	CR	TATA-containing	1	-0.737	0.278	0.446	0.379	0.276	-0.455
YDL181W	INH1	TFIID	TATA-less	1	-2.173	0.353	0.34	1.075	0.875	-0.297
YOR222W	ODC2	CR	TATA-less	1	-0.957	0.087	0.62	0.363	0.152	-1.256
YEL046C	GLY1	CR	TATA-containing	1	-0.485	0.111	0.513	0.523	0.383	-0.449
YOR065W	CYT1	CR	TATA-containing	1	-0.682	0.002	-0.257	0.579	0.366	-0.661
YLR225C	YLR225C	CR	TATA-containing	1	-0.827	0.272	0.181	0.186	0.295	0.668
YGR136W	LSB1	CR	TATA-containing	1	-0.778	0.036	0.182	0.761	0.515	-0.563
YKR093W	PTR2	CR	TATA-containing	1	-0.269	0.251	0.465	0.578	0.466	-0.31
YJR111C	YJR111C	TFIID		1	-1.724	0.404	-0.272	0.286	0.396	0.469
YLR120C	YPS1	TFIID	TATA-less	1	-0.636	0.19	0.077	0.779	0.55	-0.502
YCL026C-A	FRM2	CR		1	-0.84	-0.579	-2.2	0.974	0.779	-0.323
YER072W	VTC1	CR	TATA-less	1	-0.98	0.264	0.768	0.542	0.408	-0.41
YNL078W	NIS1	CR	TATA-less	1	-0.642	0.169	0.336	0.649	0.617	-0.074
YKR066C	CCP1	CR	TATA-less	1	-1.096	-0.215	-0.082	0.514	0.492	-0.061
YJR016C	ILV3	CR	TATA-less	1	-0.724	0.183	0.202	1.167	0.765	-0.609
YBR118W	TEF2	CR	TATA-containing	1	-0.49	0.107	0.617	0.544	0.311	-0.807
YPL256C	CLN2	CR	TATA-containing	1	-0.355	0.192	0.303	0.493	0.332	-0.572
YFL045C	SEC53	TFIID	TATA-less	1	-0.837	0.302	0.261	0.488	0.207	-1.239
YMR318C	ADH6	CR	TATA-less	1	-1.312	0.235	0.191	0.377	0.238	-0.663
YNL327W	EGT2	CR	TATA-containing	1	-0.177	0.144	0.387	0.669	0.492	-0.445
YDL025C	RTK1	CR	TATA-less	1	-1.644	0.255	-0.181	0.655	0.755	0.205
YLR167W	RPS31	TFIID	TATA-less	1	-0.795	0.126	0.712	0.405	0.239	-0.761
YDR406W	PDR15	CR	TATA-containing	1	-0.538	0.193	0.211	0.527	0.483	-0.127
YNL052W	COX5A	TFIID	TATA-less	1	-2.026	0.188	0.185	0.683	0.572	-0.255
YDR497C	ITR1	CR	TATA-containing	1	-0.595	0.257	0.12	0.707	0.509	-0.475
YKL056C	TMA19	CR	TATA-less	1	-0.928	0.154	0.584	0.349	0.261	-0.419
YPL154C	PEP4	CR	TATA-containing	1	-0.4	0.335	0.385	0.344	0.285	-0.27
YGL157W	ARI1	CR	TATA-containing	1	-0.773	0.439	0.008	0.69	0.299	-1.207
YKL151C	YKL151C	TFIID	TATA-containing	1	-0.494	0.009	0.065	0.115	0.07	-0.712
YCL043C	PDI1	CR	TATA-containing	1	-0.32	0.122	0.387	0.334	0.292	-0.197
YOL031C	SIL1	TFIID	TATA-less	1	-0.792	0.178	0.069	0.321	0.366	0.189
YGR079W	YGR079W	CR	TATA-less	1	-0.941	0.131	0.252	0.739	0.598	-0.305
YNR019W	ARE2	CR	TATA-less	1	-0.644	0.226	-0.151	0.641	0.458	-0.487
YOL039W	RPP2A	TFIID	TATA-less	1	-0.752	0.033	0.4	0.538	0.343	-0.649
YOR285W	RDL1	TFIID	TATA-containing	1	-1.143	-0.094	-0.418	0.842	0.354	-1.252
YHR179W	OYE2	CR	TATA-containing	1	-1.022	0.176	0.157	0.414	0.429	0.05
YHR094C	HXT1	CR	TATA-containing	1	-0.325	0.104	0.258	0.545	0.332	-0.716
YER062C	GPP2	CR	TATA-containing	1	-0.542	0.238	0.277	0.509	0.474	-0.104
YMR316W	DIA1	CR	TATA-containing	1	-0.892	-0.117	-0.848	0.489	0.799	0.706
YBR008C	FLR1	CR	TATA-less	1	-1.432	0.007	-0.326	0.646	0.606	-0.092
YPR020W	ATP20	TFIID	TATA-less	1	-1.796	0.457	-0.973	0.912	0.588	-0.632
YLR286C	CTS1	CR	TATA-containing	1	-0.196	0.119	0.383	0.566	0.339	-0.737
YBR052C	RFS1	TFIID	TATA-less	1	-0.811	0.191	-0.055	0.562	0.4	-0.491
YNL098C	RAS2	TFIID	TATA-less	1	-0.412	0.118	0.384	0.387	0.263	-0.555
YBR162C	TOS1	CR	TATA-less	1	-0.156	0.234	0.466	0.626	0.44	-0.51
YOR108W	LEU9	TFIID	TATA-less	1	-0.724	-0.051	0.06	0.927	0.667	-0.476
YBR158W	AMN1	CR	TATA-containing	1	-0.403	0.251	0.502	0.677	0.513	-0.401
YCR065W	HCM1	CR	TATA-less	1	-0.265	0.122	0.29	0.704	0.415	-0.763
YGL030W	RPL30	TFIID	TATA-less	1	-0.891	0.183	0.666	0.478	0.311	-0.618
YKR071C	DRE2	CR	TATA-less	1	-1.322	0.383	0.186	0.434	0.341	-0.346
YBL099W	ATP1	TFIID	TATA-less	1	-0.633	0.143	0.116	0.73	0.443	-0.721
YNL058C	YNL058C	CR	TATA-less	1	-1.201	0.282	-0.092	0.45	0.363	-0.312
YER124C	DSE1	CR	TATA-containing	1	-0.459	0.27	0.582	0.896	0.743	-0.271
YGR108W	CLB1	CR	TATA-containing	1	-0.874	0.2	0.401	0.831	0.611	-0.442
YOR182C	RPS30B	TFIID	TATA-less	1	-0.988	0.436	0.565	0.334	0.276	-0.274
YBR083W	TEC1	CR	TATA-containing	1	-0.462	-0.027	0.045	0.498	0.428	-0.22
YOR344C	TYE7	CR	TATA-containing	1	-0.238	0.09	0.43	1.516	0.996	-0.605
YAL012W	CYS3	CR	TATA-less	1	-0.664	0.2	0.312	0.549	0.335	-0.714
YGL253W	HXK2	CR	TATA-containing	1	-0.295	0.202	0.314	0.601	0.352	-0.773
YER064C	VHR2	CR	TATA-containing	1	-0.819	0.124	0.451	0.304	0.244	-0.32
YGR109C	CLB6	CR	TATA-containing	1	-0.663	0.15	0.007	0.335	0.189	-0.824
YGR230W	BNS1	TFIID	TATA-less	1	-1.536	0.091	-0.509	0.422	0.422	0
YGR281W	YOR1	CR		1	-0.539	0.295	0.339	0.468	0.351	-0.417
YNL192W	CHS1	CR	TATA-containing	1	-0.381	0.309	0.092	0.586	0.4	-0.551
YLR179C	YLR179C	CR	TATA-containing	1	-0.746	-0.018	0.107	0.714	0.747	0.064
YDL191W	RPL35A	TFIID	TATA-less	1	-0.946	0.317	0.728	0.306	0.239	-0.356
YLL012W	YEH1	CR		1	-0.576	0	-0.592	0.522	0.473	-0.14
YDR178W	SDH4	TFIID	TATA-containing	1	-1.339	0.209	-0.348	0.441	0.401	-0.137
YLR325C	RPL38	TFIID	TATA-less	1	-0.926	0.185	0.711	0.411	0.304	-0.432
YOR025W	HST3	CR	TATA-containing	1	-0.832	0.225	0.329	0.483	0.323	-0.58
YER042W	MXR1	CR	TATA-containing	1	-1.151	0.272	0.134	0.286	0.144	-0.992
YCR004C	YCP4	TFIID	TATA-containing	1	-1.416	0.245	0.17	0.462	0.793	0.781
YLR287C-A	RPS30A	CR	TATA-less	1	-0.943	0.28	0.731	0.288	0.218	-0.399
YBR001C	NTH2	CR	TATA-containing	1	-0.769	0.276	0.013	0.927	0.492	-0.914
YGR180C	RNR4	CR	TATA-containing	1	-0.265	0.116	0.058	0.375	0.403	0.101
YML116W	ATR1	CR	TATA-containing	1	-1.019	0.107	-0.38	0.827	0.372	-1.154
YOR355W	GDS1	TFIID		1	-0.33	0.275	0.468	1.067	0.655	-0.704
YOR026W	BUB3	CR	TATA-less	1	-0.793	0.048	0.461	2.397	2.136	-0.166
YOL040C	RPS15	TFIID	TATA-less	1	-0.822	0.151	0.455	0.502	0.347	-0.534
YDL205C	HEM3	CR	TATA-less	1	-1.431	0.158	-0.116	0.883	0.633	-0.478
YGR055W	MUP1	CR	TATA-containing	1	-0.328	0.165	0.509	0.705	0.503	-0.488
YDR072C	IPT1	CR	TATA-less	1	-0.926	0.242	0.381	0.583	0.444	-0.393
YKL068W-A	YKL068W-A	CR	TATA-less	1	-1.217	0.207	0.658	0.447	0.377	-0.247
YNL261W	ORC5	TFIID	TATA-containing	1	-1.8	0.469	-0.025	0.665	0.419	-0.666
YLR185W	RPL37A	TFIID	TATA-less	1	-0.86	0.109	0.594	0.654	0.402	-0.702
YMR199W	CLN1	CR	TATA-containing	1	-0.487	0.2	0.162	0.604	0.454	-0.412
YNL067W	RPL9B	TFIID	TATA-less	1	-0.633	0.117	0.832	0.565	0.351	-0.687
YGR060W	ERG25	CR	TATA-less	1	-0.784	0.249	0.48	0.561	0.425	-0.401
YOL007C	CSI2	CR	TATA-less	1	-0.525	0.3	0.22	0.722	0.288	-1.323
YML004C	GLO1	TFIID	TATA-containing	1	-1.051	0.398	0.142	0.368	0.296	-0.312
YLR300W	EXG1	CR	TATA-containing	1	-0.548	0.21	0.506	0.765	0.527	-0.538
YGL035C	MIG1	TFIID	TATA-less	1	-0.988	0.267	0.155	0.48	0.39	-0.297
YBR054W	YRO2	CR	TATA-containing	1	-0.178	0.212	0.3	0.507	0.283	-0.841
YLR390W-A	CCW14	CR	TATA-less	1	-0.591	0.122	0.422	0.475	0.28	-0.764
YDR508C	GNP1	CR	TATA-containing	1	-0.683	0.232	0.456	0.859	0.718	-0.257
YGR014W	MSB2	CR	TATA-containing	1	-0.323	0.2	0.329	0.481	0.339	-0.503
YPR043W	RPL43A	TFIID	TATA-less	1	-0.931	0.276	0.731	0.427	0.26	-0.715
YDR046C	BAP3	CR	TATA-less	1	-0.594	0.113	0.422	0.43	0.33	-0.382
YER003C	PMI40	TFIID	TATA-less	1	-0.581	0.267	0.031	0.322	0.248	-0.377
YKL185W	ASH1	CR	TATA-containing	1	-0.631	0.312	0.378	0.328	0.272	-0.269
YBR016W	YBR016W	TFIID	TATA-containing	1	-1.162	0.081	-0.093	0.525	0.291	-0.853
YKL043W	PHD1	CR	TATA-containing	1	-0.713	0.062	0.113	0.838	0.47	-0.834
YDR077W	SED1	CR	TATA-containing	1	-0.764	0.068	0.554	0.445	0.283	-0.655
YDR224C	HTB1	CR	TATA-containing	1	-0.869	0.127	0.509	0.544	0.389	-0.483
YNL244C	SUI1	TFIID	TATA-less	1	-1.175	0.447	0.54	0.5	0.37	-0.434
YOL059W	GPD2	TFIID	TATA-less	1	-0.338	0.004	0.197	0.737	0.821	0.156
YBR132C	AGP2	CR	TATA-containing	1	-0.774	0.327	0.102	0.86	0.64	-0.425
YDR226W	ADK1	CR	TATA-containing	1	-0.805	0.08	0.135	0.473	0.365	-0.375
YGR234W	YHB1	CR	TATA-containing	1	-1.271	0.213	0.476	0.468	0.4	-0.226
YHR037W	PUT2	CR	TATA-containing	1	-0.589	0.238	0.172	0.418	0.262	-0.671
YLR079W	SIC1	CR	TATA-containing	1	-0.663	0.191	0.411	0.348	0.255	-0.447
YML123C	PHO84	CR	TATA-containing	1	-0.258	0.095	0.557	0.545	0.401	-0.444
YKL141W	SDH3	TFIID	TATA-containing	1	-1.157	-0.187	-0.133	0.455	0.509	0.162
YLR023C	IZH3	TFIID	TATA-less	1	-0.87	0.246	-0.101	0.668	0.379	-0.818
YMR272C	SCS7	CR	TATA-less	1	-0.656	0.121	0.023	0.478	0.47	-0.025
YJL189W	RPL39	TFIID	TATA-less	1	-0.753	0.212	0.592	0.395	0.23	-0.784
YDR127W	ARO1	CR	TATA-less	1	-0.602	0.221	-0.041	0.662	0.391	-0.758
YMR136W	GAT2	CR	TATA-containing	1	-0.961	0.053	-0.166	0.215	0.244	0.188
YJR105W	ADO1	TFIID	TATA-less	1	-1.021	-0.057	-0.055	0.529	0.537	0.021
YPL127C	HHO1	CR	TATA-less	1	-0.648	0.136	0.088	0.302	0.328	0.118
YGR197C	SNG1	CR	TATA-less	1	-0.986	0.051	-0.375	0.54	0.335	-0.691
YNL277W	MET2	CR	TATA-containing	1	-0.946	-0.1	-0.264	0.592	0.684	0.209
YAL003W	EFB1	CR	TATA-less	1	-0.733	0.157	0.636	0.498	0.417	-0.256
YLR056W	ERG3	CR	TATA-less	1	-0.57	0.07	0.367	0.556	0.37	-0.589
YDR502C	SAM2	CR	TATA-less	1	-0.44	-0.018	-0.164	0.817	0.374	-1.126
YGR177C	ATF2	CR	TATA-less	1	-1.094	-0.048	-0.151	1.342	0.619	-1.117
YOR227W	HER1	CR	TATA-less	1	-0.869	0.111	-0.18	2.039	1.437	-0.505
YJL101C	GSH1	CR	TATA-less	1	-0.365	0.203	0.186	0.52	0.255	-1.028
YOR201C	MRM1	TFIID	TATA-less	1	-0.584	0.093	0.226	0.531	0.686	0.369
YLR049C	YLR049C	CR	TATA-less	1	-0.592	0.209	-0.151	0.387	0.162	-1.253
YLR251W	SYM1	TFIID		1	-1.195	0.183	0.032	0.534	0.554	0.053
YLR388W	RPS29A	TFIID		1	-1.012	0.254	0.664	0.461	0.331	-0.479
YDR418W	RPL12B	TFIID	TATA-less	1	-0.991	0.329	0.82	0.367	0.268	-0.456
YLR108C	YLR108C	CR	TATA-less	1	-0.466	0.148	0.247	0.527	0.343	-0.619
YHR128W	FUR1	CR	TATA-containing	1	-1.344	0.239	0.198	0.902	0.677	-0.413
YER044C	ERG28	CR	TATA-containing	1	-1.643	0.266	-0.103	0.753	0.432	-0.803
YER056C	FCY2	CR	TATA-containing	1	-0.863	0.22	0.46	0.506	0.527	0.057
YNL268W	LYP1	TFIID	TATA-less	1	-0.575	0.102	0.235	0.379	0.194	-0.963
YLL028W	TPO1	CR	TATA-containing	1	-0.697	0.129	0.138	0.994	0.766	-0.376
YHL021C	AIM17	TFIID	TATA-containing	1	-0.999	-0.013	-0.071	0.53	0.404	-0.394
YCL009C	ILV6	TFIID	TATA-less	1	-1.185	0.087	-0.176	0.749	0.425	-0.817
YBR286W	APE3	CR	TATA-containing	1	-0.662	0.172	0.406	0.34	0.245	-0.476
YLR460C	YLR460C	CR		1	-1.227	0.116	-1.795	0.778	1.462	0.91
YER145C	FTR1	CR	TATA-containing	1	-0.263	0.178	0.462	0.528	0.473	-0.157
YGR189C	CRH1	CR	TATA-containing	1	-0.382	0.101	0.265	0.407	0.272	-0.581
YDL061C	RPS29B	TFIID	TATA-less	1	-1.066	0.255	0.649	0.51	0.398	-0.357
YNR009W	NRM1	CR	TATA-containing	1	-0.807	0.283	0.042	0.861	0.452	-0.93
YLR042C	YLR042C	CR		1	-1.089	-0.003	0.123	0.885	0.879	-0.01
YDR003W	RCR2	TFIID	TATA-less	1	-1.501	0.203	0.363	0.293	0.301	0.042
YLR099C	ICT1	TFIID	TATA-containing	1	-0.965	-0.119	0.159	0.91	0.719	-0.34
YNL003C	PET8	TFIID	TATA-containing	1	-1.084	-0.12	-0.233	0.743	0.548	-0.439
YPL081W	RPS9A	TFIID	TATA-less	1	-0.837	0.14	0.707	0.557	0.4	-0.477
YPR065W	ROX1	CR	TATA-less	1	-0.48	0.193	0.243	0.845	0.484	-0.803
YNR018W	RCF2	TFIID	TATA-containing	1	-1.403	0.001	0.211	0.403	0.343	-0.232
YIL119C	RPI1	CR	TATA-containing	1	-0.903	0.22	0.431	0.532	0.38	-0.484
YGR041W	BUD9	CR	TATA-containing	1	-0.687	0.18	-0.03	0.741	0.54	-0.455
YJL048C	UBX6	CR	TATA-less	1	-0.77	-0.084	-0.309	2.087	9.273	2.152
YPL026C	SKS1	CR	TATA-less	1	-0.755	0.302	0.268	0.467	0.452	-0.047
YHR190W	ERG9	CR	TATA-containing	1	-0.907	0.388	0.285	0.509	0.383	-0.41
YGL189C	RPS26A	TFIID	TATA-less	1	-0.894	0.32	0.537	0.851	0.802	-0.086
YBR078W	ECM33	CR	TATA-less	1	-0.275	0.108	0.505	0.583	0.345	-0.757
YNL066W	SUN4	CR		1	-0.551	0.19	0.413	0.754	0.438	-0.782
YDL067C	COX9	TFIID	TATA-less	1	-1.614	0.29	-0.167	0.704	0.432	-0.704
YIR035C	YIR035C	TFIID	TATA-containing	1	-1.103	0.133	-0.232	0.763	0.545	-0.485
YDL066W	IDP1	CR	TATA-less	1	-1.121	0.281	0.158	0.345	0.419	0.28
YGR118W	RPS23A	TFIID	TATA-less	1	-0.78	0.218	0.673	0.418	0.256	-0.706
YMR015C	ERG5	CR	TATA-containing	1	-0.816	0.207	0.276	0.805	0.522	-0.625
YPL221W	FLC1	CR	TATA-less	1	-0.767	0.342	0.356	0.436	0.374	-0.222
YMR102C	YMR102C	CR		1	-0.579	0.2	0.26	1.33	0.982	-0.436
YNL180C	RHO5	CR	TATA-less	1	-0.68	-0.039	-0.003	0.749	1.091	0.544
YKL201C	MNN4	TFIID		1	-0.846	0.27	0.054	1.009	0.927	-0.122
YDL183C	YDL183C	CR		1	-0.888	-0.038	-0.943	0.672	0.948	0.497
YCL035C	GRX1	TFIID	TATA-containing	1	-1.264	0.374	0.039	0.592	0.262	-1.178
YCR031C	RPS14A	TFIID	TATA-containing	1	-0.977	0.382	0.709	0.377	0.265	-0.508
YOR063W	RPL3	CR	TATA-containing	1	-0.721	0.13	0.651	0.513	0.304	-0.758
YDL081C	RPP1A	TFIID	TATA-less	1	-1.157	0.124	0.672	0.443	0.253	-0.807
YBR218C	PYC2	CR	TATA-less	1	-0.761	0.108	-0.296	1.271	1.17	-0.119
YHL048W	COS8	TFIID		1	-0.85	0.201	-1.062	0.405	0.651	0.684
YJL034W	KAR2	CR	TATA-containing	1	-0.14	0.26	0.445	0.643	0.441	-0.544
YNL046W	YNL046W	CR	TATA-containing	1	-0.992	-0.032	0.247	0.757	0.48	-0.658
YDR222W	YDR222W	CR	TATA-containing	1	-0.876	0.21	-0.115	1.062	0.552	-0.945
YMR145C	NDE1	CR	TATA-containing	1	-0.851	0.226	0.293	0.728	0.609	-0.257
YER073W	ALD5	CR	TATA-containing	1	-0.861	0.146	0.321	0.32	0.324	0.018
YHL036W	MUP3	CR	TATA-less	1	-0.821	0.358	0.055	0.452	0.271	-0.738
YHR051W	COX6	TFIID	TATA-less	1	-1.71	-0.262	-0.33	0.399	0.293	-0.444
YLR061W	RPL22A	TFIID	TATA-less	1	-0.7	0.193	0.559	0.453	0.267	-0.764
YML130C	ERO1	CR	TATA-less	1	-0.58	0.218	-0.04	0.443	0.26	-0.771
YGR146C	ECL1	CR	TATA-less	1	-0.931	0.259	0.53	0.535	0.453	-0.24
YEL071W	DLD3	CR	TATA-containing	1	-0.591	0.187	0.248	0.584	0.528	-0.147
YDL075W	RPL31A	TFIID	TATA-less	1	-0.938	0.368	0.723	0.319	0.171	-0.898
YGL135W	RPL1B	TFIID	TATA-less	1	-0.933	0.264	0.74	0.487	0.362	-0.43
YHR092C	HXT4	CR		1	-0.992	0.046	-0.568	0.519	0.585	0.172
YPR191W	QCR2	TFIID	TATA-containing	1	-1.154	0.043	-0.289	0.506	0.696	0.46
YER020W	GPA2	TFIID	TATA-containing	1	-1.124	0.173	0.171	0.527	0.628	0.253
YOR081C	TGL5	CR		1	-0.624	0.19	-0.111	0.535	0.442	-0.276
YPL170W	DAP1	TFIID	TATA-less	1	-1.173	0.139	-0.059	0.419	0.429	0.033
YOR107W	RGS2	CR	TATA-containing	1	-0.364	0.19	0.108	0.196	0.186	-0.074
YGR044C	RME1	CR		1	-0.888	-0.077	-0.13	0.648	0.522	-0.31
YHR143W	DSE2	CR	TATA-containing	1	-0.354	0.096	0.377	0.74	0.511	-0.534
YDR171W	HSP42	CR	TATA-containing	1	-0.325	0.276	0.164	0.385	0.372	-0.051
YKL029C	MAE1	TFIID	TATA-containing	1	-0.677	0.07	-0.033	0.705	0.394	-0.838
YHL033C	RPL8A	TFIID	TATA-less	1	-0.74	0.156	0.536	0.293	0.193	-0.598
YEL040W	UTR2	CR	TATA-containing	1	-0.6	0.12	0.253	0.552	0.319	-0.789
YGL059W	PKP2	TFIID		1	-1.241	0.278	-0.245	0.549	0.52	-0.078
YDR033W	MRH1	CR	TATA-containing	1	-0.334	0.18	0.612	0.517	0.374	-0.467
YDR054C	CDC34	TFIID	TATA-less	1	-1.022	0.122	-0.054	0.467	0.42	-0.153
YPL092W	SSU1	CR	TATA-less	1	-1.457	0.009	-0.046	1.091	0.612	-0.833
YGR154C	GTO1	TFIID		1	-1.41	0.179	-0.085	0.539	0.54	0.003
YGL114W	YGL114W	CR	TATA-less	1	-1.297	0.106	-0.29	0.704	1.088	0.629
YMR058W	FET3	CR	TATA-containing	1	-0.086	0.161	0.52	0.405	0.336	-0.27
YGR279C	SCW4	CR	TATA-less	1	-0.663	0.2	0.412	0.553	0.367	-0.592
YDL130W	RPP1B	TFIID	TATA-less	1	-0.879	0.263	0.599	0.539	0.345	-0.643
YJR123W	RPS5	TFIID	TATA-less	1	-0.834	0.269	0.689	0.366	0.204	-0.846
YGL187C	COX4	TFIID	TATA-less	1	-1.698	0.245	0.192	0.513	0.622	0.279
YGL028C	SCW11	CR	TATA-less	1	-0.254	0.106	0.326	0.641	0.455	-0.495
YLR354C	TAL1	CR	TATA-containing	1	-0.998	0.037	0.346	0.561	0.358	-0.648
YCR102C	YCR102C	CR		1	-0.68	-0.261	-2.492	1.028	0.892	-0.204
YOR230W	WTM1	CR	TATA-less	1	-0.767	0.256	0.019	0.57	0.403	-0.5
YER019C-A	SBH2	TFIID	TATA-less	1	-1.621	0.38	0.45	0.474	0.703	0.57
YPL158C	AIM44	CR	TATA-containing	1	-0.415	0.034	0.274	0.448	0.285	-0.653
YKL054C	DEF1	CR	TATA-less	1	-0.532	0.231	0.353	0.973	0.427	-1.188
YDR064W	RPS13	TFIID	TATA-less	1	-0.814	0.224	0.659	0.393	0.22	-0.84
YDR432W	NPL3	TFIID	TATA-less	1	-0.651	0.268	0.604	0.285	0.188	-0.599
YKL178C	STE3	CR		1	-0.456	0.291	0.463	1.718	1.546	-0.153
YKR042W	UTH1	CR	TATA-containing	1	-0.715	0.07	0.509	0.472	0.355	-0.412
YGL225W	VRG4	TFIID	TATA-containing	1	-0.773	0.119	0.397	0.455	0.281	-0.692
YML008C	ERG6	CR	TATA-less	1	-0.793	0.2	0.364	0.516	0.45	-0.195
YNL173C	MDG1	CR	TATA-less	1	-1.281	-0.016	-0.416	0.625	0.478	-0.388
YPL016W	SWI1	TFIID	TATA-less	1	-0.272	0.096	-0.453	0.558	0.422	-0.405
YKL109W	HAP4	CR	TATA-containing	1	-0.837	0.274	0.153	0.803	0.642	-0.322
YKL001C	MET14	TFIID	TATA-containing	1	-1.645	0.238	-0.262	0.685	0.486	-0.494
YBR048W	RPS11B	CR	TATA-less	1	-0.951	0.291	0.566	0.563	0.437	-0.366
YMR196W	YMR196W	TFIID		1	-0.731	0.021	0.149	0.442	1.067	1.273
YMR011W	HXT2	CR	TATA-containing	1	-0.647	0.264	-0.472	0.612	0.512	-0.258
YPL091W	GLR1	CR	TATA-less	1	-1.225	-0.003	0.007	0.439	0.318	-0.465
YJL177W	RPL17B	TFIID	TATA-less	1	-0.826	0.145	0.507	0.717	0.647	-0.149
YGR240C	PFK1	CR	TATA-less	1	-0.343	0.227	0.449	0.71	0.758	0.095
YDR210W	YDR210W	CR	TATA-containing	1	-1.177	0.377	-0.313	0.365	0.459	0.333
YJR077C	MIR1	TFIID	TATA-less	1	-1.013	0.114	-0.052	0.648	0.456	-0.507
YGL147C	RPL9A	TFIID		1	-0.891	0.308	0.603	0.477	0.344	-0.471
YDR399W	HPT1	CR	TATA-less	1	-1.217	0.16	0.137	1.038	0.539	-0.945
YLR177W	YLR177W	CR		1	-0.681	0.141	-0.199	0.429	0.121	-1.827
YDR481C	PHO8	TFIID	TATA-containing	1	-0.816	0.197	0.27	0.761	0.604	-0.333
YML027W	YOX1	CR	TATA-containing	1	-0.655	0.093	0.236	0.276	0.348	0.335
YOR369C	RPS12	TFIID	TATA-containing	1	-0.853	0.215	0.645	0.389	0.235	-0.73
YHR203C	RPS4B	TFIID	TATA-less	1	-0.831	0.209	0.566	0.777	0.638	-0.284
YPL271W	ATP15	TFIID	TATA-less	1	-2.254	0.542	0.25	0.671	0.659	-0.027
YLR029C	RPL15A	TFIID	TATA-less	1	-0.982	0.221	0.634	0.428	0.265	-0.693
YLR295C	ATP14	TFIID	TATA-less	1	-1.282	-0.158	0.218	0.479	0.5	0.06
YDR253C	MET32	TFIID	TATA-less	1	-2.174	0.254	-0.285	0.974	1.322	0.441
YLR094C	GIS3	TFIID	TATA-less	1	-0.79	0.061	0.257	0.472	0.242	-0.961
YKL008C	LAC1	CR	TATA-less	1	-0.771	0.186	0.192	0.428	0.463	0.115
YML081C-A	ATP18	TFIID	TATA-less	1	-2.033	-0.039	-0.312	0.499	0.72	0.528
YOR198C	BFR1	TFIID	TATA-less	1	-0.663	0.196	0.161	0.622	0.391	-0.672
YJR147W	HMS2	CR	TATA-less	1	-1.233	0.163	0.462	1.611	0.94	-0.777
YGR244C	LSC2	TFIID	TATA-containing	1	-1.075	0.013	-0.202	0.646	0.355	-0.863
YKL182W	FAS1	CR		1	-0.646	0.2	0.41	0.504	0.332	-0.6
YJL144W	YJL144W	CR	TATA-containing	1	-1.557	0.064	0.01	1.019	0.438	-1.218
YEL026W	SNU13	TFIID	TATA-less	1	-1.476	0.199	0.516	0.418	0.367	-0.186
YKL125W	RRN3	CR	TATA-containing	1	-1.191	0.276	0.313	1.395	0.345	-2.017
YER001W	MNN1	CR	TATA-containing	1	-0.788	0.192	-0.166	1.13	0.559	-1.016
YHR005C	GPA1	TFIID	TATA-less	1	-0.525	0.189	0.355	0.329	0.24	-0.455
YKL016C	ATP7	TFIID	TATA-containing	1	-1.693	-0.017	-0.091	0.505	0.349	-0.533
YDR035W	ARO3	TFIID	TATA-less	1	-1.053	0.176	-0.219	0.76	0.49	-0.631
YMR181C	YMR181C	CR	TATA-containing	1	-1.381	0.426	0.503	0.557	0.655	0.233
YBR082C	UBC4	TFIID	TATA-less	1	-0.849	0.078	0.108	0.469	0.317	-0.566
YDR025W	RPS11A	TFIID	TATA-less	1	-0.893	0.231	0.559	0.454	0.356	-0.351
YGL123W	RPS2	TFIID	TATA-containing	1	-0.784	0.109	0.512	0.396	0.298	-0.412
YJR121W	ATP2	CR		1	-0.947	0.267	0.41	0.766	0.676	-0.181
YJL172W	CPS1	TFIID	TATA-containing	1	-0.92	0.243	-0.202	0.469	0.426	-0.137
YHR141C	RPL42B	TFIID	TATA-less	1	-0.851	0.21	0.667	0.353	0.234	-0.593
YOR315W	SFG1	CR	TATA-less	1	-1.074	0.101	0.194	0.551	0.427	-0.367
YML024W	RPS17A	TFIID	TATA-less	1	-0.992	0.218	0.429	0.43	0.293	-0.554
YJR094W-A	RPL43B	TFIID	TATA-less	1	-1.047	0.216	0.619	0.286	0.194	-0.56
YKL156W	RPS27A	TFIID	TATA-less	1	-1.153	0.356	0.683	0.383	0.241	-0.666
YNL024C	YNL024C	TFIID	TATA-less	1	-1.406	-0.119	-0.07	0.467	0.547	0.23
YDR037W	KRS1	CR	TATA-containing	1	-1.024	0.214	0.248	0.49	0.377	-0.379
YDL168W	SFA1	CR	TATA-less	1	-1.092	-0.051	-0.57	0.409	0.329	-0.311
YBR031W	RPL4A	TFIID	TATA-containing	1	-1.05	0.125	0.551	0.374	0.256	-0.551
YER148W	SPT15	TFIID	TATA-less	1	-1.423	0.053	0.233	0.541	0.345	-0.647
YOR043W	WHI2	TFIID	TATA-less	1	-1.232	0.271	0.35	0.544	0.401	-0.44
YOL019W	YOL019W	CR	TATA-less	1	-0.635	0.131	0.016	0.426	0.349	-0.288
YOR153W	PDR5	CR	TATA-less	1	-0.304	0.136	0.538	0.551	0.393	-0.487
YJL171C	YJL171C	CR	TATA-less	1	-1.235	0.053	-0.255	0.754	0.481	-0.647
YEL009C	GCN4	CR		1	-0.562	0.19	0.616	0.652	0.471	-0.469
YJR127C	RSF2	CR	TATA-less	1	-0.696	0.188	0.05	0.55	0.293	-0.909
YMR006C	PLB2	CR		1	-0.987	0.188	-0.026	0.569	0.599	0.075
YJL157C	FAR1	CR		1	-0.624	0.3	0.404	0.971	0.679	-0.516
YPR102C	RPL11A	TFIID	TATA-less	1	-0.984	0.297	0.455	0.575	0.419	-0.454
YPL019C	VTC3	CR	TATA-less	1	-0.391	0.226	0.454	0.881	0.536	-0.717
YKL101W	HSL1	CR	TATA-less	1	-0.346	0.241	-0.079	0.565	0.371	-0.608
YMR226C	YMR226C	CR	TATA-containing	1	-1.101	0.138	-0.213	0.594	0.279	-1.088
YMR171C	EAR1	TFIID	TATA-less	1	-0.818	0.313	0.169	0.642	0.41	-0.647
YHL015W	RPS20	TFIID	TATA-less	1	-1.017	0.298	0.566	0.476	0.295	-0.691
YDR377W	ATP17	TFIID	TATA-less	1	-2.27	0.31	0.68	0.506	0.471	-0.104
YJL167W	ERG20	CR	TATA-containing	1	-1.195	0.484	0.112	0.61	0.396	-0.621
YIL117C	PRM5	CR	TATA-less	1	-0.846	0.077	0.161	0.434	0.268	-0.698
YCL027W	FUS1	CR	TATA-less	1	-0.563	0.315	-0.287	0.665	0.504	-0.399
YPL131W	RPL5	TFIID	TATA-less	1	-0.858	0.171	0.724	0.314	0.2	-0.648
YHR021C	RPS27B	TFIID	TATA-less	1	-0.898	0.245	0.558	0.343	0.253	-0.437
YNR067C	DSE4	CR	TATA-containing	1	-0.46	0.167	0.207	0.468	0.364	-0.362
YGR027C	RPS25A	TFIID	TATA-less	1	-1.035	0.25	0.609	0.341	0.238	-0.516
YLR350W	ORM2	TFIID	TATA-containing	1	-0.779	0.166	0.019	0.656	0.557	-0.237
YGR169C-A	LSO2	TFIID	TATA-less	1	-1.205	0.241	0.212	0.326	0.163	-1.003
YBR177C	EHT1	CR		1	-0.761	-0.179	-0.585	0.385	0.401	0.059
YLR257W	YLR257W	TFIID	TATA-containing	1	-0.924	0.077	0.347	0.699	0.441	-0.664
YBL092W	RPL32	TFIID	TATA-less	1	-0.844	0.152	0.557	0.401	0.267	-0.583
YOR298C-A	MBF1	CR	TATA-containing	1	-0.869	0.189	0.658	0.463	0.32	-0.535
YCL055W	KAR4	CR	TATA-containing	1	-0.82	-0.058	-0.061	0.577	0.394	-0.551
YDR085C	AFR1	TFIID		1	-1.175	-0.217	-0.181	0.595	1.437	1.273
YNL178W	RPS3	TFIID	TATA-less	1	-0.976	0.24	0.703	0.388	0.273	-0.508
YDR501W	PLM2	TFIID		1	-0.263	-0.045	-0.603	0.416	0.336	-0.307
YIL148W	RPL40A	TFIID	TATA-less	1	-0.876	0.206	0.528	0.112	0.09	-0.304
YMR142C	RPL13B	TFIID	TATA-less	1	-0.917	0.234	0.573	0.608	0.375	-0.7
YDR135C	YCF1	CR	TATA-containing	1	-0.563	0.204	0.229	0.659	0.322	-1.032
YGL038C	OCH1	CR	TATA-less	1	-1.044	0.205	0.314	0.351	0.626	0.837
YBR161W	CSH1	TFIID	TATA-less	1	-0.663	0.076	0.295	0.207	0.076	-1.45
YLR038C	COX12	TFIID	TATA-less	1	-1.951	0.34	-0.765	0.567	0.73	0.364
YDR011W	SNQ2	CR	TATA-containing	1	-0.696	0.181	0.424	0.479	0.373	-0.36
YER091C	MET6	CR	TATA-containing	1	-0.465	0.169	0.078	0.754	0.365	-1.046
YPR113W	PIS1	CR	TATA-containing	1	-0.932	0.077	0.143	0.395	0.25	-0.663
YPR074C	TKL1	TFIID	TATA-containing	1	-0.964	0.135	0.394	0.797	0.58	-0.458
YPR106W	ISR1	CR	TATA-less	1	-1.054	0.261	-0.129	0.441	0.496	0.171
YPL143W	RPL33A	TFIID	TATA-less	1	-0.926	0.293	0.562	0.457	0.288	-0.664
YDR186C	YDR186C	TFIID	TATA-less	1	-0.621	0.248	0.15	0.264	0.191	-0.466
YHR049W	FSH1	CR	TATA-containing	1	-1.811	0.183	-0.066	0.75	0.731	-0.038
YMR108W	ILV2	TFIID	TATA-containing	1	-0.956	0.11	0.133	0.433	0.292	-0.567
YDR174W	HMO1	TFIID	TATA-less	1	-1.295	0.195	0.334	0.559	0.453	-0.304
YKR046C	PET10	TFIID		1	-1.785	0.062	-0.243	1.426	0.847	-0.752
YPR119W	CLB2	CR	TATA-less	1	-0.894	0.336	0.371	0.41	0.323	-0.343
YBL072C	RPS8A	TFIID	TATA-less	1	-0.771	0.183	0.604	1.064	0.887	-0.263
YIR034C	LYS1	TFIID	TATA-containing	1	-1.08	-0.183	-0.636	0.615	0.818	0.412
YDL180W	YDL180W	CR	TATA-less	1	-1.421	-0.287	-0.576	0.856	0.656	-0.384
YJR059W	PTK2	CR	TATA-containing	1	-0.619	0.176	0.147	0.433	0.496	0.196
YLR441C	RPS1A	TFIID	TATA-less	1	-0.853	0.227	0.694	0.419	0.24	-0.801
YIL123W	SIM1	CR	TATA-less	1	-0.338	0.118	0.246	0.447	0.388	-0.204
YEL063C	CAN1	TFIID	TATA-less	1	-0.985	0.322	0.088	1.035	0.749	-0.467
YPR120C	CLB5	TFIID	TATA-less	1	-0.642	-0.023	-0.199	0.448	0.422	-0.088
YDR354W	TRP4	TFIID	TATA-less	1	-1.318	-0.053	-0.264	0.672	1.649	1.295
YLR244C	MAP1	TFIID	TATA-less	1	-1.024	0.11	0.189	0.493	0.237	-1.059
YNL176C	TDA7	CR	TATA-less	1	-1.864	-0.024	-0.355	0.627	0.661	0.076
YMR307W	GAS1	CR	TATA-less	1	-0.637	0.206	0.487	0.688	0.458	-0.587
YBR149W	ARA1	CR	TATA-containing	1	-0.998	0.095	0.082	0.337	0.251	-0.429
YPL078C	ATP4	TFIID	TATA-less	1	-1.563	0.246	0.079	0.464	0.377	-0.301
YPR127W	YPR127W	TFIID	TATA-containing	1	-1.819	-0.039	-0.215	0.524	0.793	0.599
YGL008C	PMA1	CR	TATA-containing	1	-0.449	0.122	0.568	0.341	0.234	-0.543
YOL147C	PEX11	TFIID	TATA-containing	1	-1.338	-0.127	-0.415	0.544	0.523	-0.059
YPR086W	SUA7	TFIID	TATA-less	1	-1.461	0.197	-0.212	0.42	0.267	-0.653
YDR148C	KGD2	TFIID	TATA-less	1	-1.345	0.041	-0.274	0.403	0.304	-0.407
YBL027W	RPL19B	TFIID	TATA-less	1	-0.936	0.195	0.561	0.267	0.185	-0.527
YDR309C	GIC2	CR	TATA-containing	1	-0.502	0.062	0.101	0.669	0.541	-0.307
YNR016C	ACC1	CR		1	-0.754	0.217	0.246	0.54	0.374	-0.529
YOL136C	PFK27	CR	TATA-containing	1	-0.999	0.372	0.137	0.393	0.394	0.005
YNL217W	YNL217W	CR	TATA-less	1	-1.257	0.071	-0.019	0.559	0.57	0.029
YEL054C	RPL12A	TFIID	TATA-less	1	-0.919	0.213	0.541	0.474	0.376	-0.335
YOR212W	STE4	TFIID	TATA-less	1	-0.894	0.381	0.303	0.556	0.576	0.049
YPR002W	PDH1	CR		1	-1.193	-0.308	-1.342	0.658	0.499	-0.398
YPR009W	SUT2	TFIID	TATA-less	1	-1.203	-0.071	-0.404	0.295	0.428	0.54
YGR037C	ACB1	TFIID	TATA-containing	1	-1.289	0.274	0.434	0.578	0.404	-0.515
YDR500C	RPL37B	TFIID	TATA-less	1	-1.118	0.239	0.45	0.338	0.293	-0.204
YLR256W	HAP1	CR	TATA-containing	1	-0.164	0.191	0.507	0.654	0.658	0.008
YER089C	PTC2	TFIID	TATA-less	1	-1.165	0.066	0.043	0.534	0.267	-0.998
YKL142W	MRP8	TFIID	TATA-less	1	-0.889	0.063	-0.13	0.88	0.382	-1.205
YML059C	NTE1	TFIID	TATA-less	1	-0.826	0.237	-0.35	0.562	0.307	-0.872
YLR293C	GSP1	TFIID	TATA-less	1	-1.107	0.321	0.384	0.36	0.244	-0.559
YOR096W	RPS7A	TFIID	TATA-containing	1	-0.919	0.245	0.625	0.599	0.577	-0.054
YOR370C	MRS6	TFIID	TATA-less	1	-1.319	0.31	0.222	0.41	0.289	-0.509
YDL170W	UGA3	CR	TATA-less	1	-1.208	0.107	-0.947	0.448	0.737	0.717
YOL126C	MDH2	CR	TATA-containing	1	-1.236	0.113	0.246	0.588	0.393	-0.582
YDR173C	ARG82	CR	TATA-less	1	-1.529	0.258	0.245	1.033	0.809	-0.352
YOR122C	PFY1	TFIID	TATA-less	1	-1.082	0.282	0.569	0.393	0.324	-0.281
YLR153C	ACS2	CR	TATA-containing	1	-0.976	0.181	0.031	0.498	0.54	0.116
YMR305C	SCW10	CR	TATA-less	1	-0.552	0.171	0.16	0.654	0.532	-0.3
YGR157W	CHO2	CR	TATA-less	1	-1.081	0.338	0.384	0.421	0.336	-0.324
YJR137C	MET5	TFIID		1	-1.328	0.062	-0.483	1.197	0.836	-0.517
YKL120W	OAC1	CR	TATA-containing	1	-1.113	0.309	0.093	0.448	0.279	-0.685
YOR142W	LSC1	CR	TATA-containing	1	-1.181	0.263	0.283	0.469	0.358	-0.389
YBR011C	IPP1	TFIID	TATA-less	1	-0.72	0.067	0.495	0.25	0.154	-0.7
YPL049C	DIG1	CR	TATA-less	1	-0.759	0.135	0.194	0.441	0.371	-0.248
YGR282C	BGL2	TFIID	TATA-less	1	-0.632	0.082	0.556	0.468	0.352	-0.413
YJR045C	SSC1	CR	TATA-less	1	-0.626	0.287	0.491	0.536	0.59	0.137
YOR047C	STD1	CR	TATA-less	1	-0.733	0.242	0.041	0.487	0.271	-0.845
YOR187W	TUF1	TFIID	TATA-less	1	-0.919	0.057	0.134	0.318	0.334	0.075
YLR299W	ECM38	CR	TATA-containing	1	-1.542	0.171	-0.187	0.429	0.336	-0.353
YHR046C	INM1	CR	TATA-less	1	-1.451	-0.178	-0.323	0.69	0.62	-0.153
YKL081W	TEF4	CR	TATA-less	1	-0.884	0.156	0.517	0.66	0.493	-0.42
YER117W	RPL23B	TFIID	TATA-less	1	-0.958	0.35	0.772	0.456	0.334	-0.451
YGL077C	HNM1	CR	TATA-containing	1	-0.813	-0.026	-0.045	0.774	0.617	-0.327
YLR432W	IMD3	CR	TATA-containing	1	-1.153	0.128	0.178	1.864	1.8	-0.05
YML048W	GSF2	CR	TATA-containing	1	-1.2	0.131	0.265	0.553	0.345	-0.681
YDL171C	GLT1	TFIID	TATA-less	1	-0.942	0.159	-0.062	2.558	2.397	-0.094
YLR249W	YEF3	CR	TATA-containing	1	-0.844	0.227	0.588	0.497	0.336	-0.565
YHR029C	YHI9	TFIID	TATA-less	1	-1.391	-0.144	-0.565	1.426	1.148	-0.312
YER088C	DOT6	TFIID	TATA-less	1	-0.818	0.031	0.157	0.693	0.455	-0.607
YHR216W	IMD2	CR	TATA-containing	1	-0.67	0.104	-0.667	8.675	5.706	-0.604
YHL035C	VMR1	CR		1	-0.871	0.288	0.027	0.234	0.192	-0.286
YDR382W	RPP2B	TFIID	TATA-less	1	-1.17	0.163	0.681	0.428	0.323	-0.405
YPR005C	HAL1	CR		1	-1.182	-0.37	-1.027	0.466	0.327	-0.511
YGR034W	RPL26B	TFIID	TATA-less	1	-0.88	0.252	0.633	0.503	0.376	-0.418
YDR002W	YRB1	TFIID	TATA-less	1	-1.258	0.241	0.276	0.362	0.198	-0.867
YOR342C	YOR342C	TFIID		1	-0.823	0.247	0.239	0.377	0.196	-0.943
YOR267C	HRK1	TFIID	TATA-containing	1	-0.948	0.28	0.067	0.572	0.668	0.225
YOR184W	SER1	CR		1	-0.934	0.275	-0.018	0.276	0.295	0.097
YPL117C	IDI1	TFIID	TATA-less	1	-1.131	0.09	0.171	0.387	0.417	0.109
YGR250C	YGR250C	CR	TATA-containing	1	-1.045	0.188	-0.297	0.341	0.496	0.541
YPL066W	RGL1	TFIID	TATA-less	1	-0.831	-0.085	0.016	0.615	0.433	-0.504
YDR492W	IZH1	CR	TATA-containing	1	-1.379	0.088	-0.225	0.38	1.095	1.529
YJL082W	IML2	CR	TATA-containing	1	-0.871	0.235	0.032	0.71	0.37	-0.941
YLR372W	ELO3	TFIID	TATA-containing	1	-1.031	0.219	0.376	0.611	0.334	-0.871
YLR180W	SAM1	CR	TATA-containing	1	-0.851	0.131	0.246	0.49	0.38	-0.365
YJL057C	IKS1	TFIID	TATA-containing	1	-1.575	0.138	-0.407	0.578	0.51	-0.181
YPL082C	MOT1	CR	TATA-containing	1	-0.587	0.162	0.119	0.637	0.323	-0.977
YNL125C	ESBP6	TFIID	TATA-less	1	-0.955	-0.125	-0.457	0.599	0.57	-0.073
YDR233C	RTN1	TFIID	TATA-containing	1	-0.951	0.002	0.373	0.605	0.536	-0.175
YJL194W	CDC6	CR	TATA-less	1	-0.792	0.34	0.094	0.553	0.405	-0.447
YEL047C	FRD1	TFIID	TATA-containing	1	-1.102	-0.012	-0.432	1.214	1.896	0.644
YFL039C	ACT1	TFIID	TATA-less	1	-0.578	0.217	0.503	0.462	0.313	-0.56
YDR270W	CCC2	CR	TATA-less	1	-0.598	0.113	0.123	1.701	1.581	-0.106
YMR043W	MCM1	CR	TATA-less	1	-0.769	0.18	0.231	0.949	1.344	0.501
YGL055W	OLE1	CR	TATA-containing	1	-1.204	-0.007	0.036	1.492	0.992	-0.589
YDR232W	HEM1	TFIID	TATA-less	1	-0.825	0.064	0.037	0.403	0.483	0.263
YMR001C	CDC5	TFIID	TATA-less	1	-0.844	0.269	0.259	0.643	0.44	-0.546
YJL130C	URA2	CR	TATA-less	1	-0.429	0.219	0.01	2.208	1.734	-0.349
YGL116W	CDC20	CR	TATA-less	1	-0.875	0.038	-0.141	0.654	0.631	-0.052
YDR385W	EFT2	TFIID	TATA-less	1	-1.013	0.122	0.516	0.68	0.505	-0.431
YOR317W	FAA1	TFIID		1	-0.687	0.26	-0.048	0.395	0.322	-0.294
YDL146W	LDB17	TFIID	TATA-less	1	-1.07	0.163	-0.129	1.043	1.086	0.057
YMR246W	FAA4	CR	TATA-containing	1	-1.311	0.245	0.575	0.383	0.228	-0.75
YKR094C	RPL40B	TFIID	TATA-less	1	-1.014	0.202	0.666	0.494	0.381	-0.374
YNL065W	AQR1	CR	TATA-containing	1	-1.058	0.106	0.268	0.574	1.015	0.821
YMR179W	SPT21	TFIID		1	-0.704	0.059	-0.193	0.638	0.297	-1.104
YPL274W	SAM3	CR	TATA-containing	1	-1.087	0.103	0.133	0.417	0.533	0.356
YHR183W	GND1	CR	TATA-containing	1	-1.247	0.221	0.281	0.672	0.617	-0.123
YOL030W	GAS5	CR	TATA-containing	1	-0.984	0.097	-0.13	0.769	0.584	-0.396
YBR238C	YBR238C	TFIID	TATA-less	1	-0.909	0.229	-0.327	1.104	0.779	-0.503
YLR064W	PER33	CR	TATA-less	1	-1.298	0.12	-0.099	0.36	0.292	-0.298
YKL104C	GFA1	TFIID	TATA-less	1	-0.818	0.116	0.088	0.563	0.281	-1.004
YGR155W	CYS4	CR	TATA-containing	1	-1.27	0.26	0.564	0.507	0.31	-0.708
YJL196C	ELO1	CR	TATA-containing	1	-1.047	-0.027	-0.286	0.685	0.615	-0.155
YGL103W	RPL28	TFIID	TATA-less	1	-0.669	0.218	0.789	0.492	0.297	-0.729
YIL122W	POG1	TFIID	TATA-less	1	-0.433	-0.116	-0.592	0.615	0.724	0.235
YDR450W	RPS18A	TFIID	TATA-less	1	-0.933	0.261	0.673	0.474	0.334	-0.504
YDR069C	DOA4	CR	TATA-less	1	-1.48	0.08	-0.581	0.274	0.764	1.48
YGR070W	ROM1	TFIID		1	-1.038	0.235	-0.2	0.571	0.357	-0.679
YDR005C	MAF1	TFIID	TATA-less	1	-1.087	0.291	-0.018	0.426	0.402	-0.083
YKR060W	UTP30	CR	TATA-containing	1	-1.461	0.374	-0.016	0.551	0.408	-0.434
YOR312C	RPL20B	TFIID	TATA-less	1	-1.038	0.265	0.474	0.255	0.147	-0.799
YOR018W	ROD1	CR	TATA-less	1	-1.16	0.177	-0.444	0.543	0.385	-0.494
YLR040C	AFB1	CR		1	-0.926	0.175	0.361	0.266	0.203	-0.393
YOR092W	ECM3	TFIID		1	-0.761	0.162	-0.122	1.641	1.426	-0.202
YLR342W	FKS1	CR	TATA-less	1	-0.512	0.168	0.43	0.414	0.253	-0.714
YFR006W	YFR006W	TFIID		1	-1.146	0.164	-0.009	0.385	0.248	-0.634
YPL231W	FAS2	CR	TATA-containing	1	-0.871	0.223	0.259	0.568	0.383	-0.568
YNL112W	DBP2	TFIID	TATA-containing	1	-0.97	0.198	0.408	1.407	1.936	0.461
YMR266W	RSN1	CR	TATA-containing	1	-0.688	0.185	-0.091	0.582	0.522	-0.157
YBR006W	UGA2	TFIID		1	-1.55	0.038	-0.656	0.672	0.7	0.059
YLR034C	SMF3	CR	TATA-less	1	-0.642	0.133	0.127	0.494	0.295	-0.743
YDL117W	CYK3	CR	TATA-less	1	-0.879	0.239	0.15	0.523	0.375	-0.478
YMR031C	EIS1	CR	TATA-less	1	-0.774	0.263	0.219	0.406	0.251	-0.697
YBR222C	PCS60	TFIID	TATA-containing	1	-1.017	0.087	-0.277	0.812	0.449	-0.853
YOR137C	SIA1	TFIID	TATA-less	1	-0.68	0.081	0.149	0.334	0.129	-1.374
YDR195W	REF2	CR	TATA-containing	1	-1.179	0.024	-0.255	1.136	0.747	-0.604
YKL110C	KTI12	TFIID	TATA-less	1	-1.104	0.259	-0.026	0.637	0.742	0.221
YML073C	RPL6A	TFIID	TATA-less	1	-0.999	0.356	0.713	0.431	0.299	-0.527
YPL198W	RPL7B	CR	TATA-containing	1	-1.065	0.187	0.626	1.144	1.047	-0.127
YBL042C	FUI1	TFIID	TATA-less	1	-0.755	0.052	-0.148	0.641	0.47	-0.448
YPR159W	KRE6	TFIID	TATA-less	1	-0.842	0.161	0.252	0.381	0.348	-0.131
YML119W	YML119W	TFIID	TATA-less	1	-1.053	-0.032	-0.287	0.585	0.43	-0.444
YGR143W	SKN1	TFIID	TATA-containing	1	-0.849	0.137	-0.014	0.255	0.246	-0.054
YOR204W	DED1	CR	TATA-containing	1	-0.747	0.182	0.423	0.482	0.327	-0.559
YKL106W	AAT1	TFIID	TATA-containing	1	-1.188	0.243	-0.376	0.528	0.714	0.436
YGL202W	ARO8	TFIID	TATA-less	1	-1.107	0.082	-0.036	0.415	0.554	0.416
YIL140W	AXL2	TFIID	TATA-less	1	-0.586	0.192	-0.467	0.562	0.394	-0.51
YLR403W	SFP1	TFIID		1	-0.693	0.178	0.218	0.623	0.528	-0.239
YHR208W	BAT1	TFIID	TATA-less	1	-1.221	0.098	-0.007	0.726	0.431	-0.751
YJR073C	OPI3	CR		1	-1.707	-0.265	-0.102	0.57	0.707	0.312
YOR066W	MSA1	TFIID	TATA-less	1	-0.988	0.089	-0.076	0.312	0.338	0.116
YJR148W	BAT2	CR	TATA-less	1	-1.712	0.197	0.652	0.69	0.995	0.528
YLR254C	NDL1	TFIID	TATA-less	1	-1.118	-0.192	0.119	0.401	0.724	0.853
YOL020W	TAT2	TFIID	TATA-less	1	-0.933	0.164	0.335	0.311	0.274	-0.183
YDR507C	GIN4	TFIID	TATA-less	1	-0.622	0.045	-0.179	0.459	0.457	-0.004
YMR032W	HOF1	TFIID	TATA-less	1	-1.233	0.296	-0.188	0.257	0.575	1.163
YGR032W	GSC2	TFIID		1	-1.073	0.27	0.186	0.609	0.734	0.271
YJL012C	VTC4	CR	TATA-less	1	-0.717	0.195	0.512	0.391	0.21	-0.898
YPL015C	HST2	TFIID	TATA-less	1	-1.008	0.232	-0.17	0.447	0.425	-0.073
YLR183C	TOS4	TFIID	TATA-less	1	-0.594	0.228	-0.46	0.604	0.356	-0.761
YMR116C	ASC1	TFIID	TATA-less	1	-1.477	0.112	0.406	0.612	0.466	-0.393
YNL209W	SSB2	TFIID	TATA-less	1	-1.111	0.261	0.609	0.481	0.314	-0.615
YHR084W	STE12	CR	TATA-less	1	-0.748	0.169	-0.206	1.138	0.51	-1.158
YKL062W	MSN4	TFIID		1	-1.41	0.148	-0.092	0.615	0.52	-0.243
YBR191W	RPL21A	TFIID	TATA-less	1	-1.062	0.319	0.593	0.367	0.262	-0.485
YMR143W	RPS16A	TFIID	TATA-less	1	-0.834	0.157	0.461	0.345	0.273	-0.339
YMR220W	ERG8	TFIID	TATA-containing	1	-1.561	0.193	0.197	0.715	0.829	0.214
YHR112C	YHR112C	TFIID	TATA-containing	1	-1.468	0.109	-0.412	0.488	0.416	-0.23
YNL007C	SIS1	CR	TATA-containing	1	-0.95	0.182	0.372	0.562	0.322	-0.806
YKL117W	SBA1	TFIID	TATA-less	1	-1.361	0.363	0.263	0.316	0.219	-0.527
YBR287W	YBR287W	TFIID	TATA-containing	1	-1.142	0.206	0.249	0.73	0.759	0.055
YBR112C	CYC8	TFIID	TATA-less	1	-0.661	0.063	0.117	0.401	0.251	-0.677
YOR383C	FIT3	CR	TATA-less	1	-0.736	0.1	-0.114	0.561	0.313	-0.841
YKR089C	TGL4	TFIID	TATA-less	1	-0.8	0.163	0.152	0.383	0.249	-0.619
YLR190W	MMR1	TFIID	TATA-less	1	-0.917	0.05	-0.021	0.484	0.34	-0.511
YER046W	SPO73	TFIID		1	-1.389	-0.025	-0.211	0.747	1.032	0.466
YDR047W	HEM12	TFIID	TATA-less	1	-0.675	0.285	0.372	0.632	0.672	0.088
YGR204W	ADE3	CR	TATA-containing	1	-0.741	0.062	0.189	0.589	0.512	-0.201
YDR099W	BMH2	TFIID		1	-0.799	0.192	0.33	0.562	0.37	-0.601
YDR275W	BSC2	CR		1	-0.403	0.112	0.436	0.168	0.141	-0.257
YKL193C	SDS22	TFIID	TATA-less	1	-1.152	0.22	-0.419	0.997	0.585	-0.769
YLR113W	HOG1	CR	TATA-less	1	-0.696	0.06	0.172	1.455	2.015	0.469
YDR019C	GCV1	CR	TATA-containing	1	-1.014	0.048	0.191	0.776	0.621	-0.322
YJL141C	YAK1	TFIID	TATA-less	1	-0.702	0.336	0.095	0.355	0.399	0.169
YJR103W	URA8	CR	TATA-containing	1	-0.412	-0.091	0.344	0.443	0.143	-1.627
YER043C	SAH1	CR	TATA-less	1	-1.346	0.145	0.475	0.537	0.555	0.048
YDL126C	CDC48	TFIID	TATA-less	1	-0.908	0.161	0.443	0.496	0.568	0.196
YOR360C	PDE2	TFIID	TATA-less	1	-1.377	0.033	-0.014	0.952	1.112	0.224
YGL056C	SDS23	TFIID	TATA-less	1	-1.048	0.212	0.082	0.298	0.302	0.019
YNL328C	MDJ2	TFIID	TATA-less	1	-0.841	-0.071	-0.25	0.454	0.459	0.017
YGR092W	DBF2	TFIID	TATA-less	1	-1.145	0.339	0.129	0.58	0.365	-0.668
YER090W	TRP2	TFIID	TATA-less	1	-1.265	0.159	-0.328	0.345	0.308	-0.166
YGR159C	NSR1	TFIID	TATA-less	1	-1.291	0.248	0.372	0.747	0.768	0.04
YJR004C	SAG1	CR		1	-0.645	0.091	0.324	0.176	0.107	-0.718
YKL116C	PRR1	TFIID	TATA-less	1	-1.302	0.311	0.072	0.346	0.209	-0.726
YMR242C	RPL20A	TFIID	TATA-less	1	-1.009	0.29	0.559	0.538	0.494	-0.122
YLR375W	STP3	TFIID	TATA-less	1	-1.216	0.248	0.306	0.352	0.278	-0.343
YDR151C	CTH1	TFIID	TATA-less	1	-1.389	0.195	0.032	0.708	0.785	0.149
YMR297W	PRC1	TFIID	TATA-less	1	-0.922	-0.034	0.065	0.457	0.34	-0.428
YKL032C	IXR1	TFIID		1	-1.074	0.104	0.166	0.355	0.364	0.035
YMR037C	MSN2	CR		1	-1.354	0.333	0.233	0.557	0.835	0.584
YJL138C	TIF2	CR	TATA-containing	1	-1.079	0.205	0.426	0.658	0.531	-0.308
YJL187C	SWE1	TFIID	TATA-less	1	-0.837	0.196	0.114	0.293	0.248	-0.239
YGR229C	SMI1	TFIID	TATA-less	1	-1.048	0.323	0.277	0.472	0.427	-0.147
YDR527W	RBA50	TFIID		1	-0.803	0.081	0.21	0.605	1.18	0.963
YDL229W	SSB1	TFIID	TATA-containing	1	-0.963	0.192	0.415	0.469	0.314	-0.58
YNL281W	HCH1	TFIID	TATA-less	1	-1.533	0.042	0.539	0.59	0.527	-0.164
YOL006C	TOP1	TFIID	TATA-less	1	-0.882	0.045	0.11	0.702	0.391	-0.844
YKL165C	MCD4	TFIID	TATA-containing	1	-0.856	0.38	-0.125	0.503	0.455	-0.146
YDR132C	YDR132C	CR	TATA-less	1	-1.912	-0.337	-0.422	0.711	3.165	2.155
YPL141C	FRK1	CR	TATA-less	1	-1.12	0.173	-0.203	0.387	0.615	0.67
YNL234W	YNL234W	TFIID	TATA-less	1	-1.129	0.205	-0.746	0.894	0.872	-0.036
YBL029C-A	YBL029C-A	TFIID	TATA-containing	1	-1.79	-0.131	-0.89	0.954	0.5	-0.93
YBR073W	RDH54	TFIID	TATA-containing	1	-0.953	0.313	-0.021	0.636	0.482	-0.401
YDR365C	ESF1	TFIID	TATA-less	1	-0.382	0.202	0.324	0.802	0.973	0.28
YLR340W	RPP0	TFIID	TATA-less	1	-0.929	0.155	0.583	0.33	0.211	-0.644
YGR175C	ERG1	CR	TATA-less	1	-1.243	0.256	0.436	0.224	0.203	-0.143
YLR214W	FRE1	CR	TATA-less	1	-2.15	-0.044	0.029	0.487	0.541	0.152
YDR089W	YDR089W	CR	TATA-less	1	-0.848	-0.03	-0.259	0.471	0.378	-0.316
YIL107C	PFK26	TFIID	TATA-less	1	-1.084	0.22	-0.447	1.11	0.483	-1.201
YDR006C	SOK1	TFIID	TATA-less	1	-1.183	0.198	0.083	0.299	0.336	0.169
YMR016C	SOK2	TFIID		1	-1.226	-0.067	-0.262	0.544	0.391	-0.476
YBR039W	ATP3	TFIID	TATA-less	1	-1.604	0.159	-0.01	0.346	0.346	0
YGR040W	KSS1	CR		1	-1.065	0.023	0.143	0.302	0.274	-0.142
YCR008W	SAT4	TFIID	TATA-containing	1	-1.061	0.206	0.088	0.387	0.202	-0.934
YJR070C	LIA1	TFIID	TATA-less	1	-1.277	0.115	0.183	0.59	0.442	-0.418
YLR058C	SHM2	TFIID	TATA-containing	1	-0.923	0.121	0.141	0.648	0.412	-0.655
YLL023C	POM33	TFIID	TATA-less	1	-1.601	0.155	0.204	0.429	0.571	0.413
YLR084C	RAX2	CR	TATA-less	1	-1.062	0.282	0.159	0.751	0.606	-0.309
YMR296C	LCB1	TFIID	TATA-less	1	-0.81	0.047	0.148	0.231	0.192	-0.266
YAL044C	GCV3	TFIID	TATA-containing	1	-1.445	-0.086	0.319	0.559	0.409	-0.451
YAL005C	SSA1	CR	TATA-containing	1	-0.934	0.101	0.464	0.429	0.291	-0.56
YEL065W	SIT1	CR	TATA-containing	1	-1.072	0.041	0.109	0.718	0.478	-0.587
YJL212C	OPT1	CR	TATA-containing	1	-1.451	0.18	0.271	0.68	0.405	-0.747
YDR389W	SAC7	TFIID		1	-0.764	0.185	0.029	0.521	0.495	-0.074
YKL039W	PTM1	CR	TATA-containing	1	-1.075	0.197	0.14	0.436	0.485	0.155
YGL071W	AFT1	TFIID	TATA-less	1	-0.723	0.198	0.175	0.264	0.281	0.092
YPL068C	YPL068C	TFIID	TATA-less	1	-0.982	0.105	-0.143	0.83	0.501	-0.728
YPL137C	GIP3	TFIID	TATA-less	1	-1.19	0.386	0.135	0.285	0.447	0.647
YML120C	NDI1	TFIID	TATA-containing	1	-1.652	0.15	0.338	0.39	0.233	-0.742
YNL087W	TCB2	CR	TATA-containing	1	-1.651	0.002	-0.208	0.507	0.885	0.803
YMR186W	HSC82	CR	TATA-containing	1	-1.045	0.231	0.462	0.681	0.563	-0.275
YBR069C	TAT1	CR	TATA-containing	1	-0.86	0.189	0.497	0.585	0.592	0.017
YML035C	AMD1	TFIID	TATA-less	1	-0.941	0.1	0.056	0.351	0.38	0.116
YDR096W	GIS1	TFIID		1	-0.94	0.061	-0.167	0.799	0.9	0.171
YGR023W	MTL1	TFIID	TATA-less	1	-0.912	-0.001	-0.484	0.69	0.387	-0.833
YBR067C	TIP1	TFIID	TATA-containing	1	-1.001	0.09	0.478	0.446	0.486	0.124
YNR053C	NOG2	TFIID	TATA-containing	1	-1.131	0.262	0.286	0.66	0.521	-0.342
YJR030C	YJR030C	TFIID	TATA-less	1	-0.646	0.214	-0.089	0.376	0.15	-1.329
YLR220W	CCC1	TFIID	TATA-containing	1	-1.274	-0.234	-0.2	0.507	0.487	-0.058
YOR337W	TEA1	TFIID	TATA-less	1	-1.365	0.116	-0.48	0.55	0.497	-0.145
YCR011C	ADP1	TFIID	TATA-less	1	-0.811	0.361	0.167	0.578	0.563	-0.037
YCR021C	HSP30	CR	TATA-containing	1	-0.871	0.078	-0.517	0.656	0.419	-0.645
YBR007C	DSF2	CR	TATA-less	1	-1.007	0.126	-0.497	0.699	0.614	-0.187
YER026C	CHO1	CR	TATA-containing	1	-1.288	0.041	0.011	0.51	0.356	-0.519
YHR042W	NCP1	TFIID	TATA-containing	1	-0.881	0.09	0.14	0.516	0.379	-0.445
YLL024C	SSA2	CR	TATA-containing	1	-1.14	0.188	0.52	0.522	0.294	-0.829
YML056C	IMD4	TFIID	TATA-containing	1	-1.292	0.177	0.452	0.263	0.119	-1.14
YOR071C	NRT1	TFIID		1	-1.14	-0.113	-0.697	1.055	0.64	-0.72
YPL262W	FUM1	TFIID	TATA-less	1	-1.693	0.126	-0.354	0.757	0.891	0.235
YDL140C	RPO21	TFIID		1	-0.946	0.188	0.354	0.391	0.318	-0.299
YDR214W	AHA1	CR	TATA-less	1	-1.732	0.268	0.27	0.368	0.33	-0.154
YBR114W	RAD16	TFIID	TATA-containing	1	-1.01	-0.023	-0.587	0.852	0.567	-0.589
YBR038W	CHS2	TFIID	TATA-less	1	-1.021	0.117	-0.164	0.646	0.394	-0.713
YNR043W	MVD1	TFIID	TATA-containing	1	-1.043	0.219	-0.188	0.439	0.294	-0.58
YJR092W	BUD4	TFIID	TATA-less	1	-1.023	0.123	-0.027	0.302	0.3	-0.008
YPR114W	YPR114W	TFIID	TATA-less	1	-0.937	0.137	0.341	0.971	1.353	0.479
YPR115W	RGC1	TFIID	TATA-less	1	-0.768	0.024	-0.16	0.795	0.812	0.03
YDR194C	MSS116	TFIID	TATA-containing	1	-1.113	0.297	0.186	0.539	0.328	-0.719
YER036C	ARB1	TFIID	TATA-containing	1	-1.048	0.218	0.489	0.775	0.627	-0.306
YOR020C	HSP10	TFIID	TATA-less	1	-2.385	0.467	0.446	0.449	0.379	-0.243
YBR025C	OLA1	TFIID	TATA-less	1	-1.211	0.112	0.125	1.277	1.156	-0.143
YML016C	PPZ1	TFIID	TATA-containing	1	-1.009	0.239	-0.069	1.037	0.706	-0.554
YOR306C	MCH5	CR	TATA-containing	1	-1.2	0.07	0.054	0.554	0.558	0.01
YLR332W	MID2	TFIID	TATA-less	1	-0.782	0.225	0.106	0.413	0.435	0.076
YNL064C	YDJ1	TFIID	TATA-containing	1	-1.446	0.293	0.478	0.588	0.423	-0.474
YGL206C	CHC1	TFIID	TATA-less	1	-0.831	0.139	0.144	0.433	0.362	-0.26
YPR158W	CUR1	TFIID	TATA-less	1	-0.8	-0.204	-0.24	0.351	0.108	-1.696
YMR217W	GUA1	TFIID	TATA-containing	1	-1.207	0.294	0.324	0.383	0.346	-0.145
YLR278C	YLR278C	TFIID	TATA-less	1	-1.275	-0.011	-0.311	0.352	0.404	0.197
YMR086W	SEG1	TFIID	TATA-less	1	-1.47	0.252	0.053	0.459	0.395	-0.217
YKR067W	GPT2	TFIID	TATA-less	1	-1.852	-0.073	-0.293	0.466	0.495	0.09
YGL178W	MPT5	TFIID	TATA-less	1	-1.294	0.176	-0.083	0.557	0.543	-0.038
YDR153C	ENT5	TFIID	TATA-less	1	-1.149	0.246	0.157	0.495	0.576	0.217
YLR413W	INA1	CR	TATA-containing	1	-1.063	0.159	0.49	0.539	0.459	-0.231
YHR007C	ERG11	CR	TATA-containing	1	-1.138	0.231	0.437	0.603	0.541	-0.156
YDR146C	SWI5	TFIID	TATA-less	1	-1.275	0.376	0.176	0.475	0.41	-0.214
YML117W	NAB6	TFIID	TATA-less	1	-1.04	0.217	0.136	0.465	0.421	-0.144
YLR259C	HSP60	TFIID	TATA-containing	1	-1.116	0.122	0.386	0.48	0.33	-0.539
YNL280C	ERG24	TFIID	TATA-less	1	-1.233	0.16	0.021	0.42	0.411	-0.032
YBR101C	FES1	TFIID	TATA-less	1	-1.467	0.223	0.079	0.45	0.342	-0.394
YGR218W	CRM1	TFIID	TATA-less	1	-1.044	0.25	0.124	0.413	0.422	0.029
YER103W	SSA4	TFIID	TATA-less	1	-1.174	0.2	-0.305	0.504	0.311	-0.698
YOL002C	IZH2	CR	TATA-less	1	-1.318	-0.135	-0.689	1.554	0.529	-1.554
YPL095C	EEB1	CR	TATA-containing	1	-2.246	0.095	-0.176	0.534	0.461	-0.213
YLL026W	HSP104	CR	TATA-containing	1	-0.936	0.187	0.289	0.398	0.345	-0.204
YDR258C	HSP78	TFIID	TATA-containing	1	-1.013	0.269	-0.061	0.341	0.243	-0.49
YIL009W	FAA3	CR	TATA-less	1	-1.215	0.227	0.248	0.575	0.57	-0.013
YNL008C	ASI3	CR	TATA-containing	1	-1.153	-0.074	-0.12	0.987	1.786	0.856
YML126C	ERG13	TFIID	TATA-containing	1	-1.333	0.047	0.141	0.489	0.459	-0.093
YGR211W	ZPR1	TFIID	TATA-less	1	-1.485	0.191	-0.007	0.362	0.425	0.231
YNL186W	UBP10	TFIID	TATA-less	1	-1.297	0.172	0.065	0.702	0.612	-0.197
YPL106C	SSE1	TFIID	TATA-less	1	-1.428	0.181	0.188	0.613	0.563	-0.123
YNL141W	AAH1	TFIID	TATA-less	1	-1.172	0.07	-0.159	0.29	0.327	0.173
YPL240C	HSP82	CR	TATA-containing	1	-1.133	0.232	0.404	0.421	0.393	-0.1
YNL299W	TRF5	CR	TATA-less	1	-0.295	0.057	0.101	1.013	1.705	0.751
YGR260W	TNA1	TFIID	TATA-containing	1	-1.503	0.308	-0.175	0.589	0.429	-0.458
YGR042W	YGR042W	CR		1	-1.089	-0.224	0.023	0.827	1.347	0.703
YDR111C	ALT2	TFIID	TATA-less	1	-1.38	0.005	-0.511	1.749	1.457	-0.263
YKL084W	HOT13	CR		1	-1.01	-0.297	-0.025	0.981	1.701	0.794
YOR027W	STI1	CR	TATA-containing	1	-1.529	0.236	0.337	0.559	0.653	0.223
YHL029C	OCA5	TFIID	TATA-less	1	-1.204	0.13	0.037	0.548	0.318	-0.783
YLR216C	CPR6	TFIID	TATA-less	1	-1.448	0.089	0.14	0.696	0.475	-0.55
YKL216W	URA1	CR	TATA-containing	1	-1.551	0.01	-0.532	0.941	0.361	-1.381
YDL241W	YDL241W	TFIID	TATA-containing	1	-1.109	0.364	-1.889	1.632	0.449	-1.863
YGR142W	BTN2	CR	TATA-containing	1	-1.49	-0.175	-0.801	0.804	0.599	-0.426
YER175C	TMT1	TFIID		2	-0.792	-0.056	-0.237	0.866	0.894	0.046
YHR138C	YHR138C	TFIID	TATA-less	2	-0.973	0.304	0.344	0.557	0.292	-0.929
YPL249C-A	RPL36B	TFIID	TATA-less	2	-0.788	0.081	0.583	0.467	0.385	-0.28
YLR395C	COX8	TFIID	TATA-less	2	-2.109	0.004	-0.04	0.807	0.61	-0.405
YOR234C	RPL33B	TFIID	TATA-less	2	-0.895	0.345	0.594	0.636	0.458	-0.475
YDL130W-A	STF1	TFIID	TATA-less	2	-0.908	-0.236	-0.692	0.339	0.501	0.563
YJL136C	RPS21B	TFIID	TATA-less	2	-0.91	0.143	0.465	0.459	0.278	-0.724
YNL239W	LAP3	CR	TATA-less	2	-1.903	0.211	0.062	0.55	0.614	0.16
YHR122W	CIA2	TFIID	TATA-less	2	-1.606	-0.196	-0.623	0.466	0.642	0.462
YPR010C-A	YPR010C-A	TFIID	TATA-less	2	-1.957	0.217	-0.681	0.894	0.862	-0.054
YNL260C	LTO1	CR	TATA-containing	2	-1.76	0.016	0.144	0.501	0.852	0.767
YNL162W	RPL42A	TFIID	TATA-less	2	-0.981	0.224	0.684	0.425	0.293	-0.538
YBR162W-A	YSY6	TFIID	TATA-less	2	-1.303	0.022	0.398	0.674	0.515	-0.389
YLR406C	RPL31B	TFIID	TATA-less	2	-1.134	0.349	0.562	0.924	0.807	-0.196
YKL091C	YKL091C	TFIID	TATA-less	2	-1.319	0.175	0.205	0.996	0.293	-1.765
YOR293W	RPS10A	TFIID	TATA-less	2	-1.063	0.398	0.613	0.514	0.345	-0.575
YBL087C	RPL23A	TFIID	TATA-less	2	-1.023	0.42	0.692	0.61	0.377	-0.694
YDL045W-A	MRP10	TFIID	TATA-containing	2	-1.597	0.133	-0.132	0.733	0.778	0.087
YGR117C	YGR117C	TFIID	TATA-less	2	-1.181	0.157	-0.077	0.383	0.409	0.097
YMR315W	YMR315W	TFIID	TATA-containing	2	-1.131	-0.093	-0.176	0.95	0.52	-0.869
YER074W	RPS24A	TFIID	TATA-less	2	-0.898	0.282	0.649	0.376	0.241	-0.637
YDR471W	RPL27B	TFIID	TATA-less	2	-0.879	0.212	0.647	0.527	0.405	-0.378
YDR510W	SMT3	TFIID	TATA-less	2	-1.115	-0.09	-0.125	0.502	0.432	-0.218
YBR046C	ZTA1	CR	TATA-less	2	-1.511	0.044	-0.377	0.627	0.588	-0.092
YPL090C	RPS6A	TFIID	TATA-less	2	-0.921	0.219	0.552	0.5	0.315	-0.666
YHL001W	RPL14B	TFIID	TATA-less	2	-1.038	0.141	0.541	0.504	0.269	-0.908
YKL040C	NFU1	CR	TATA-containing	2	-1.689	-0.018	-0.259	0.292	0.246	-0.246
YKL006W	RPL14A	TFIID	TATA-less	2	-0.865	0.229	0.521	0.487	0.278	-0.811
YOL121C	RPS19A	TFIID	TATA-less	2	-1.054	0.343	0.695	0.566	0.432	-0.392
YGL162W	SUT1	TFIID	TATA-containing	2	-1.125	0.134	-0.05	0.306	0.442	0.533
YIL052C	RPL34B	TFIID	TATA-less	2	-0.856	0.223	0.724	0.534	0.282	-0.923
YEL072W	RMD6	TFIID	TATA-less	2	-1.75	0.288	-0.171	0.641	0.672	0.068
YNL220W	ADE12	TFIID	TATA-containing	2	-1.502	0.214	0.175	1.562	0.971	-0.686
YPL087W	YDC1	TFIID	TATA-less	2	-1.242	0.082	-0.101	0.689	0.375	-0.877
YDL136W	RPL35B	TFIID	TATA-less	2	-1.013	0.246	0.55	0.246	0.164	-0.579
YPR132W	RPS23B	TFIID	TATA-less	2	-0.941	0.288	0.667	0.386	0.298	-0.374
YDR447C	RPS17B	TFIID	TATA-less	2	-0.977	0.239	0.63	0.603	0.39	-0.627
YER102W	RPS8B	TFIID	TATA-less	2	-0.869	0.25	0.59	1.222	1.127	-0.116
YNL213C	RRG9	TFIID	TATA-less	2	-2.205	-0.145	-0.183	0.27	0.451	0.739
YER048W-A	ISD11	TFIID	TATA-less	2	-1.494	0.174	0.286	0.366	0.526	0.524
YBL093C	ROX3	TFIID	TATA-less	2	-1.659	-0.16	-0.228	0.407	0.311	-0.387
YIL069C	RPS24B	TFIID	TATA-less	2	-0.859	0.094	0.527	0.557	0.412	-0.433
YOR289W	YOR289W	TFIID	TATA-less	2	-1.086	-0.078	-0.238	0.446	0.29	-0.619
YJR086W	STE18	TFIID	TATA-less	2	-1.952	0.248	0.371	0.474	0.399	-0.247
YML026C	RPS18B	TFIID	TATA-less	2	-0.884	0.243	0.594	0.547	0.397	-0.464
YIL133C	RPL16A	TFIID	TATA-less	2	-1.033	0.348	0.548	0.605	0.356	-0.763
YJL118W	YJL118W	TFIID	TATA-containing	2	-1.524	0.141	-0.057	0.961	0.616	-0.642
YLL058W	YLL058W	TFIID		2	-1.566	0.088	-0.953	0.455	1.396	1.617
YKL148C	SDH1	TFIID	TATA-containing	2	-1.895	0.026	-0.465	0.928	2.009	1.113
YJL060W	BNA3	TFIID	TATA-containing	2	-1.394	0.225	-0.235	0.508	0.467	-0.121
YER056C-A	RPL34A	TFIID	TATA-less	2	-1.198	0.223	0.693	0.347	0.269	-0.365
YJL190C	RPS22A	TFIID	TATA-less	2	-1.067	0.101	0.824	0.571	0.376	-0.603
YBR181C	RPS6B	TFIID	TATA-less	2	-1.112	0.213	0.537	0.348	0.266	-0.388
YFL034C-A	RPL22B	TFIID	TATA-less	2	-0.793	0.143	0.637	0.483	0.265	-0.867
YGR085C	RPL11B	TFIID	TATA-less	2	-1.081	0.253	0.662	0.662	0.464	-0.515
YOR167C	RPS28A	TFIID	TATA-less	2	-1.712	0.209	0.41	0.788	0.634	-0.313
YPR048W	TAH18	TFIID	TATA-less	2	-1.801	0.256	-0.72	0.525	1.196	1.188
YOL120C	RPL18A	TFIID	TATA-less	2	-0.993	0.21	0.68	0.416	0.258	-0.687
YDL029W	ARP2	CR	TATA-less	2	-1.542	0.095	0.016	0.497	0.224	-1.151
YJR145C	RPS4A	TFIID	TATA-less	2	-0.877	0.179	0.603	0.433	0.248	-0.804
YJR010W	MET3	TFIID	TATA-less	2	-1.948	0.511	-0.486	0.683	0.53	-0.364
YNL302C	RPS19B	TFIID	TATA-less	2	-1.093	0.267	0.579	0.333	0.257	-0.378
YLR264W	RPS28B	TFIID	TATA-less	2	-1.589	0.236	0.338	0.83	0.67	-0.309
YJR025C	BNA1	TFIID	TATA-less	2	-1.414	-0.066	-0.278	0.597	0.516	-0.21
YLR250W	SSP120	TFIID	TATA-less	2	-1.689	0.089	0.028	0.815	1.047	0.362
YDR368W	YPR1	TFIID	TATA-less	2	-1.82	0.1	-0.417	0.561	0.408	-0.459
YML063W	RPS1B	TFIID	TATA-less	2	-0.972	0.217	0.676	0.4	0.307	-0.384
YLR344W	RPL26A	TFIID	TATA-less	2	-1.155	0.354	0.659	0.552	0.435	-0.345
YOR130C	ORT1	TFIID	TATA-less	2	-1.229	0.032	-0.09	0.392	0.337	-0.219
YBR005W	RCR1	TFIID	TATA-less	2	-1.558	0.08	-0.588	0.747	0.436	-0.776
YOL113W	SKM1	TFIID	TATA-less	2	-1.354	-0.085	-0.362	0.353	0.392	0.15
YLR100W	ERG27	TFIID	TATA-less	2	-1.317	0.089	0.091	0.723	0.512	-0.498
YKL180W	RPL17A	TFIID	TATA-less	2	-1.049	0.255	0.649	0.441	0.256	-0.786
YLL055W	YCT1	CR		2	-1.499	-0.126	-1.455	0.568	1.856	1.709
YOL127W	RPL25	TFIID	TATA-less	2	-1.081	0.303	0.757	0.408	0.243	-0.752
YER131W	RPS26B	TFIID	TATA-less	2	-0.952	0.207	0.497	0.48	0.346	-0.473
YBR084C-A	RPL19A	TFIID	TATA-less	2	-0.952	0.132	0.515	0.417	0.239	-0.8
YNL069C	RPL16B	TFIID	TATA-less	2	-0.92	0.281	0.572	0.468	0.332	-0.495
YER095W	RAD51	TFIID		2	-1.043	0.134	0.061	0.466	0.251	-0.893
YNL096C	RPS7B	TFIID	TATA-less	2	-1.078	0.339	0.625	0.509	0.379	-0.426
YLL009C	COX17	TFIID	TATA-less	2	-1.531	0.07	-0.348	0.543	0.334	-0.7
YCL057C-A	MIC10	TFIID	TATA-less	2	-1.796	-0.047	-0.248	0.634	0.406	-0.644
YGR239C	PEX21	CR	TATA-less	2	-1.884	0.059	0.162	0.388	0.543	0.485
YHR010W	RPL27A	TFIID	TATA-less	2	-0.905	0.267	0.646	0.6	0.379	-0.662
YIL018W	RPL2B	TFIID	TATA-less	2	-0.923	0.25	0.591	0.354	0.206	-0.781
YNR074C	AIF1	CR	TATA-less	2	-1.872	0.124	-0.876	2.877	6.709	1.222
YIL074C	SER33	TFIID		2	-1.568	-0.034	-0.035	0.321	0.266	-0.269
YBR243C	ALG7	CR	TATA-less	2	-1.809	-0.239	-0.507	0.511	0.702	0.458
YOL111C	MDY2	TFIID	TATA-less	2	-1.145	0.102	-0.181	0.35	0.366	0.063
YJL115W	ASF1	TFIID		2	-0.851	-0.036	-0.246	0.339	0.263	-0.365
YBL016W	FUS3	TFIID	TATA-containing	2	-1.069	0.274	-0.246	0.856	0.733	-0.225
YDL157C	YDL157C	TFIID	TATA-less	2	-1.756	0.215	-0.452	0.496	0.337	-0.557
YDL082W	RPL13A	TFIID	TATA-less	2	-1.201	0.342	0.717	0.304	0.286	-0.091
YBR201C-A	YBR201C-A	TFIID	TATA-containing	2	-1.409	0.477	-0.906	0.481	0.753	0.646
YIR038C	GTT1	TFIID		2	-1.658	0.185	-0.109	0.254	0.251	-0.018
YDL083C	RPS16B	TFIID	TATA-less	2	-1.008	0.162	0.449	0.422	0.333	-0.344
YBR252W	DUT1	TFIID	TATA-containing	2	-1.251	-0.135	-0.813	0.772	0.508	-0.606
YOR220W	RCN2	TFIID	TATA-less	2	-1.553	-0.041	-0.206	0.422	0.346	-0.287
YFR031C-A	RPL2A	TFIID	TATA-less	2	-0.897	0.095	0.432	0.595	0.488	-0.285
YBL069W	AST1	TFIID	TATA-containing	2	-1.408	-0.122	-0.344	0.456	0.43	-0.086
YMR194W	RPL36A	TFIID	TATA-less	2	-1.201	0.168	0.519	0.477	0.298	-0.678
YDR262W	YDR262W	TFIID	TATA-containing	2	-0.761	0.035	0.095	0.589	0.556	-0.082
YGR134W	CAF130	TFIID	TATA-less	2	-2	-0.146	-0.517	0.7	0.789	0.173
YJL164C	TPK1	TFIID		2	-1.345	0.164	0.055	0.309	0.545	0.82
YJL100W	LSB6	TFIID		2	-1.575	-0.155	-0.534	0.802	0.796	-0.01
YMR230W	RPS10B	TFIID	TATA-less	2	-1.134	0.247	0.394	0.261	0.171	-0.609
YKR069W	MET1	TFIID	TATA-containing	2	-1.718	-0.055	-0.481	0.529	0.39	-0.441
YGR214W	RPS0A	TFIID	TATA-less	2	-1.011	0.186	0.489	0.617	0.516	-0.257
YLL045C	RPL8B	TFIID	TATA-less	2	-1.083	0.185	0.546	0.381	0.205	-0.894
YGR149W	YGR149W	TFIID		2	-1.573	0.17	-0.316	0.393	0.468	0.252
YDR476C	YDR476C	TFIID	TATA-containing	2	-1.523	-0.042	-0.032	1.276	0.92	-0.472
YNL130C	CPT1	CR	TATA-less	2	-1.771	0.243	-0.046	0.301	0.295	-0.028
YLR074C	BUD20	TFIID	TATA-containing	2	-1.817	-0.045	0.023	0.298	0.248	-0.263
YKL186C	MTR2	TFIID	TATA-containing	2	-1.032	-0.218	-0.099	0.585	0.709	0.278
YGL076C	RPL7A	TFIID	TATA-less	2	-1.03	0.276	0.618	0.192	0.155	-0.309
YJL210W	PEX2	TFIID	TATA-less	2	-1.819	0.205	-0.185	0.431	0.514	0.253
YML070W	DAK1	TFIID	TATA-containing	2	-1.686	-0.005	-0.079	0.309	0.352	0.189
YLR150W	STM1	TFIID	TATA-less	2	-1.047	0.24	0.614	0.648	0.569	-0.188
YOL143C	RIB4	CR	TATA-containing	2	-1.703	0.097	-0.292	0.349	0.388	0.152
YGR010W	NMA2	TFIID	TATA-less	2	-1.942	-0.047	-0.473	0.347	0.867	1.323
YPL203W	TPK2	TFIID	TATA-less	2	-1.66	0.284	0.09	0.521	0.478	-0.124
YGR097W	ASK10	TFIID	TATA-less	2	-0.662	0.165	-0.205	0.753	0.701	-0.103
YPR069C	SPE3	CR	TATA-containing	2	-1.643	-0.01	-0.279	0.849	0.577	-0.557
YMR177W	MMT1	CR	TATA-less	2	-1.681	-0.227	-0.511	0.843	0.502	-0.75
YNL156C	NSG2	TFIID	TATA-less	2	-1.291	0.203	0.142	0.411	0.405	-0.019
YPL252C	YAH1	TFIID	TATA-containing	2	-1.169	-0.289	-0.108	0.821	1.244	0.599
YGR148C	RPL24B	TFIID	TATA-less	2	-0.961	0.258	0.48	0.964	0.913	-0.078
YDR480W	DIG2	TFIID	TATA-less	2	-1.505	0.119	0.148	0.462	0.298	-0.635
YER143W	DDI1	TFIID		2	-1.602	-0.098	-0.343	0.316	0.328	0.053
YBL106C	SRO77	CR		2	-1.187	0.051	-0.799	2.039	1.062	-0.941
YGR065C	VHT1	CR	TATA-containing	2	-1.579	0.209	-0.37	0.373	0.437	0.229
YDL128W	VCX1	TFIID	TATA-less	2	-1.093	0.16	0.235	0.619	0.548	-0.174
YGR205W	TDA10	TFIID	TATA-less	2	-1.45	0.237	-0.167	0.71	0.717	0.014
YOL016C	CMK2	TFIID	TATA-containing	2	-1.396	0.129	-0.338	0.549	0.409	-0.426
YGL191W	COX13	TFIID	TATA-less	2	-1.72	-0.049	0.224	0.383	0.256	-0.583
YMR009W	ADI1	TFIID	TATA-containing	2	-1.588	-0.046	-0.347	0.496	0.747	0.59
YKR080W	MTD1	TFIID	TATA-less	2	-1.518	0.102	-0.127	0.913	0.565	-0.694
YLR448W	RPL6B	TFIID	TATA-less	2	-1.039	0.195	0.531	0.515	0.377	-0.45
YMR180C	CTL1	CR		2	-1.47	-0.106	0.357	0.91	0.631	-0.528
YOR054C	VHS3	TFIID	TATA-less	2	-1.438	0.054	-0.167	0.542	0.341	-0.667
YBR070C	ALG14	TFIID	TATA-less	2	-0.985	-0.029	-0.291	0.372	0.512	0.462
YLR376C	PSY3	TFIID		2	-1.397	0.226	0.334	0.154	0.109	-0.497
YKL094W	YJU3	TFIID	TATA-containing	2	-1.554	0.191	-0.086	0.697	0.402	-0.795
YFR030W	MET10	TFIID	TATA-containing	2	-1.319	0.007	-0.704	0.557	0.394	-0.499
YLR333C	RPS25B	TFIID		2	-1.378	0.245	0.473	0.396	0.3	-0.399
YMR202W	ERG2	TFIID	TATA-containing	2	-1.515	-0.033	-0.114	0.526	0.496	-0.087
YPL202C	AFT2	CR	TATA-less	2	-1.56	0.17	-0.087	0.356	0.432	0.278
YDR297W	SUR2	TFIID	TATA-containing	2	-1.393	0.116	-0.277	0.741	0.38	-0.964
YAL039C	CYC3	TFIID	TATA-less	2	-0.514	-0.389	-0.309	0.678	0.664	-0.029
YDL012C	YDL012C	TFIID	TATA-containing	2	-1.411	0.11	-0.267	0.669	0.598	-0.161
YML121W	GTR1	TFIID	TATA-less	2	-0.744	0.123	-0.068	0.27	0.326	0.272
YIL158W	AIM20	TFIID	TATA-less	2	-1.623	0.153	0.046	0.423	0.382	-0.146
YNL053W	MSG5	TFIID	TATA-less	2	-1.468	0.135	-0.122	1.035	0.641	-0.693
YNL111C	CYB5	TFIID	TATA-containing	2	-1.702	0.322	-0.068	0.625	0.467	-0.42
YOR385W	YOR385W	TFIID	TATA-containing	2	-1.659	-0.045	-0.558	0.661	0.724	0.132
YJR122W	IBA57	TFIID	TATA-less	2	-2.123	0.05	-0.145	0.342	0.629	0.879
YGL148W	ARO2	TFIID	TATA-less	2	-1.5	0.234	0.382	0.378	0.26	-0.542
YLR048W	RPS0B	TFIID	TATA-less	2	-0.912	0.22	0.463	0.625	0.366	-0.773
YPL037C	EGD1	TFIID	TATA-less	2	-1.754	0.051	0.503	0.521	0.23	-1.18
YGL054C	ERV14	TFIID		2	-1.42	0.207	0.268	0.337	0.339	0.006
YPR133W-A	TOM5	TFIID	TATA-less	2	-1.511	-0.153	-0.76	0.826	0.748	-0.143
YOR133W	EFT1	TFIID	TATA-less	2	-1.103	0.176	0.465	0.785	0.421	-0.899
YGL006W	PMC1	TFIID	TATA-less	2	-1.159	0.158	-0.118	0.468	0.451	-0.054
YGR019W	UGA1	TFIID		2	-1.194	0.179	0.01	0.754	1.925	1.353
YML086C	ALO1	TFIID	TATA-less	2	-2.314	-0.099	-0.13	0.628	0.953	0.601
YAR018C	KIN3	TFIID	TATA-less	2	-1.458	0.088	-0.337	0.363	0.53	0.546
YDL072C	YET3	TFIID	TATA-containing	2	-1.165	0.016	0.174	0.414	0.401	-0.047
YOL158C	ENB1	CR	TATA-less	2	-1.302	0.042	-0.299	0.624	0.375	-0.737
YCL001W	RER1	TFIID	TATA-less	2	-1.864	0.339	-0.24	0.652	0.532	-0.294
YGL190C	CDC55	TFIID		2	-1.186	0.426	0.396	0.856	0.504	-0.763
YJR130C	STR2	TFIID		2	-1.47	0.089	-0.469	0.465	0.296	-0.652
YIR018W	YAP5	TFIID	TATA-less	2	-1.165	-0.076	0.168	0.476	0.424	-0.168
YMR184W	ADD37	TFIID	TATA-less	2	-1.342	0.07	-0.176	0.515	0.438	-0.234
YKL052C	ASK1	TFIID	TATA-less	2	-1.517	0.214	0.37	0.455	0.516	0.182
YIL049W	DFG10	TFIID	TATA-containing	2	-1.668	0.08	-0.106	0.683	0.465	-0.553
YBL076C	ILS1	TFIID	TATA-less	2	-1.116	0.228	0.273	0.692	0.388	-0.835
YLR008C	PAM18	TFIID	TATA-less	2	-1.648	-0.111	0.09	0.42	0.225	-0.899
YOL012C	HTZ1	TFIID	TATA-less	2	-1.607	0.109	-0.06	0.615	0.4	-0.621
YBR034C	HMT1	TFIID	TATA-containing	2	-1.573	0.204	-0.003	0.464	0.527	0.183
YGR233C	PHO81	TFIID	TATA-less	2	-0.824	0.208	0.169	0.423	0.436	0.045
YFR010W	UBP6	TFIID	TATA-containing	2	-1.344	0.349	0.229	0.414	0.252	-0.718
YPL079W	RPL21B	TFIID	TATA-less	2	-1.383	0.31	0.619	0.42	0.325	-0.373
YLR028C	ADE16	TFIID	TATA-less	2	-1.09	0.293	0.607	0.126	0.085	-0.568
YDR249C	YDR249C	TFIID	TATA-less	2	-1.669	0.03	-0.298	0.235	0.476	1.021
YGL031C	RPL24A	TFIID		2	-1.146	0.307	0.478	0.978	1.047	0.099
YPL179W	PPQ1	TFIID	TATA-less	2	-1.235	0.175	0.225	0.77	0.431	-0.837
YOR044W	IRC23	TFIID	TATA-less	2	-1.817	0.258	0.378	0.632	0.48	-0.397
YBR189W	RPS9B	TFIID	TATA-less	2	-1.202	0.3	0.689	0.303	0.225	-0.429
YNL079C	TPM1	TFIID	TATA-less	2	-1.407	-0.029	0.284	0.341	0.295	-0.212
YBR077C	SLM4	TFIID	TATA-less	2	-1.59	0.049	0.39	0.512	0.414	-0.306
YNL108C	YNL108C	TFIID	TATA-containing	2	-1.379	0.102	-0.152	0.353	0.215	-0.719
YDL192W	ARF1	TFIID	TATA-less	2	-1.568	0.394	0.565	0.497	0.328	-0.596
YDL238C	GUD1	TFIID		2	-1.476	0.011	-0.19	0.594	0.431	-0.463
YGL221C	NIF3	TFIID	TATA-containing	2	-1.816	0.247	0.077	0.35	0.464	0.408
YNL042W	BOP3	TFIID	TATA-less	2	-1.427	-0.138	-0.114	0.451	0.757	0.749
YPL028W	ERG10	TFIID	TATA-containing	2	-1.385	0.244	0.221	0.421	0.22	-0.937
YDR156W	RPA14	TFIID	TATA-less	2	-1.144	0.076	0.289	0.382	0.267	-0.514
YLR378C	SEC61	TFIID	TATA-less	2	-1.03	0.139	0.26	0.623	0.561	-0.15
YPR052C	NHP6A	TFIID	TATA-less	2	-1.533	0.267	0.233	0.64	0.45	-0.507
YKL138C	MRPL31	TFIID	TATA-containing	2	-1.881	0.111	-0.094	0.322	0.279	-0.206
YHR163W	SOL3	TFIID	TATA-containing	2	-1.288	-0.232	0.105	1.351	2.267	0.747
YHR030C	SLT2	TFIID		2	-1.567	0.184	0.021	0.768	0.379	-1.021
YOR347C	PYK2	TFIID		2	-1.182	0.321	-0.136	0.452	0.426	-0.087
YOL052C	SPE2	TFIID	TATA-less	2	-1.176	0.098	-0.284	1.106	0.3	-1.882
YER002W	NOP16	TFIID	TATA-less	2	-1.301	0.421	0.223	0.319	0.237	-0.431
YDR517W	GRH1	TFIID	TATA-less	2	-1.079	0.102	-0.067	0.391	0.382	-0.032
YBR199W	KTR4	TFIID	TATA-less	2	-1.009	-0.054	0.088	0.433	0.257	-0.751
YLR089C	ALT1	TFIID	TATA-less	2	-1.42	0.135	0.079	0.651	0.48	-0.438
YML053C	YML053C	TFIID	TATA-less	2	-1.342	-0.104	-0.075	0.567	0.277	-1.036
YKL112W	ABF1	TFIID	TATA-less	2	-0.997	0.256	0.129	0.291	0.296	0.024
YLL062C	MHT1	TFIID	TATA-less	2	-1.371	-0.279	-1.218	1.546	1.319	-0.229
YIR011C	STS1	TFIID	TATA-less	2	-1.65	0.028	-0.045	0.318	0.379	0.255
YER092W	IES5	TFIID	TATA-containing	2	-2.195	-0.021	0.085	0.605	0.681	0.171
YML075C	HMG1	TFIID	TATA-less	2	-1.185	0.143	-0.123	0.844	0.329	-1.358
YKR057W	RPS21A	TFIID	TATA-less	2	-1.305	0.284	0.58	0.488	0.248	-0.978
YIL002W-A	YIL002W-A	TFIID		2	-1.667	-0.154	-0.457	0.725	0.86	0.248
YNR060W	FRE4	CR		2	-1.823	-0.191	-1.187	2.507	1.835	-0.45
YMR083W	ADH3	TFIID	TATA-containing	2	-1.267	0.125	0.329	0.374	0.288	-0.375
YOR162C	YRR1	TFIID	TATA-less	2	-1.745	0.051	-0.48	0.326	0.544	0.737
YFR005C	SAD1	TFIID	TATA-less	2	-1.531	0.247	-0.13	0.26	0.328	0.332
YMR121C	RPL15B	TFIID		2	-1.542	0.128	-0.05	0.753	0.767	0.027
YBL028C	YBL028C	TFIID	TATA-less	2	-1.988	0.274	-0.714	0.451	0.644	0.514
YLR130C	ZRT2	CR	TATA-less	2	-1.661	0.096	-0.153	0.469	0.551	0.234
YDR472W	TRS31	TFIID	TATA-less	2	-0.998	0.034	-0.551	6.1	19.326	1.664
YOR058C	ASE1	TFIID	TATA-less	2	-1.264	0.141	-0.198	0.351	0.298	-0.234
YJL117W	PHO86	TFIID	TATA-less	2	-1.15	0.198	0.182	0.621	0.473	-0.393
YMR265C	YMR265C	CR	TATA-less	2	-1.769	0.079	-0.388	0.215	0.472	1.136
YGR267C	FOL2	TFIID	TATA-less	2	-1.779	0.242	0.024	0.589	0.382	-0.624
YHR039C-A	VMA10	TFIID	TATA-less	2	-1.65	0.298	0.221	0.437	0.428	-0.029
YML018C	YML018C	TFIID	TATA-less	2	-1.17	-0.007	-0.268	0.44	0.513	0.22
YDR334W	SWR1	TFIID	TATA-less	2	-0.901	0.193	-0.057	0.276	0.236	-0.229
YLL029W	FRA1	TFIID	TATA-less	2	-0.804	0.143	0.242	0.413	0.213	-0.956
YLL050C	COF1	TFIID	TATA-less	2	-1.436	0.238	0.07	0.431	0.363	-0.245
YMR311C	GLC8	TFIID	TATA-less	2	-1.513	0.002	0.165	0.364	0.239	-0.606
YOR209C	NPT1	TFIID	TATA-less	2	-1.403	0.369	0.118	0.419	0.211	-0.988
YIL075C	RPN2	TFIID	TATA-less	2	-1.109	0.195	0.298	0.444	0.242	-0.879
YPL089C	RLM1	TFIID	TATA-less	2	-1.11	0.277	0.085	0.413	0.421	0.028
YHR048W	YHK8	TFIID		2	-1.821	-0.359	-0.975	0.915	0.649	-0.495
YPL048W	CAM1	TFIID	TATA-less	2	-1.375	0.07	0.005	0.392	0.451	0.202
YLR407W	YLR407W	TFIID	TATA-less	2	-1.861	0.312	0.095	0.318	0.422	0.408
YMR241W	YHM2	TFIID	TATA-less	2	-1.429	-0.154	-0.089	0.718	0.63	-0.188
YML034W	SRC1	TFIID	TATA-less	2	-1.03	0.074	0.023	0.471	0.39	-0.273
YGR130C	YGR130C	TFIID	TATA-less	2	-1.167	0.238	0.163	0.28	0.178	-0.655
YNL305C	BXI1	TFIID	TATA-less	2	-1.296	-0.151	-0.428	0.369	0.292	-0.336
YDR086C	SSS1	TFIID	TATA-less	2	-1.295	0.056	-0.14	0.43	0.395	-0.122
YBL041W	PRE7	TFIID	TATA-less	2	-1.558	0.163	0.384	0.352	0.283	-0.313
YGL248W	PDE1	TFIID		2	-1.56	0.352	-0.011	0.336	0.259	-0.372
YLL018C	DPS1	TFIID	TATA-less	2	-1.39	0.045	-0.047	0.474	0.437	-0.117
YNL240C	NAR1	TFIID	TATA-less	2	-0.788	-0.278	-0.658	0.364	0.134	-1.445
YGR152C	RSR1	TFIID	TATA-less	2	-1.193	0.12	-0.154	0.298	0.297	-0.001
YHR193C	EGD2	TFIID	TATA-less	2	-1.634	0.007	0.253	0.338	0.194	-0.804
YNL278W	CAF120	TFIID	TATA-less	2	-1.352	0.087	-0.158	0.679	0.76	0.163
YDL014W	NOP1	TFIID		2	-1.287	0.134	0.379	0.403	0.319	-0.337
YGL026C	TRP5	TFIID	TATA-less	2	-1.328	0.199	-0.138	0.816	0.448	-0.867
YMR008C	PLB1	TFIID		2	-1.385	0.107	-0.03	0.641	0.614	-0.064
YLR387C	REH1	TFIID	TATA-less	2	-1.656	-0.045	-0.087	0.573	0.384	-0.578
YFL004W	VTC2	CR	TATA-less	2	-1.165	0.16	0.093	0.571	0.457	-0.324
YKL082C	RRP14	TFIID	TATA-less	2	-1.465	0.277	-0.045	0.534	0.451	-0.245
YDR391C	YDR391C	TFIID		2	-1.474	-0.101	-0.557	0.678	0.36	-0.915
YOR185C	GSP2	TFIID	TATA-less	2	-1.162	-0.172	-0.683	0.555	0.248	-1.159
YPR165W	RHO1	TFIID	TATA-less	2	-1.415	0.357	0.303	0.422	0.256	-0.722
YDR505C	PSP1	TFIID		2	-1.433	0.267	0.13	0.704	0.537	-0.39
YGL215W	CLG1	TFIID	TATA-less	2	-1.286	0.17	0.091	0.524	0.535	0.03
YJL186W	MNN5	TFIID	TATA-containing	2	-1.169	0.033	-0.043	0.572	0.468	-0.287
YMR149W	SWP1	TFIID	TATA-less	2	-1.556	0.136	-0.058	1.134	0.622	-0.866
YHR143W-A	RPC10	TFIID	TATA-less	2	-1.912	0.159	0.126	0.734	0.549	-0.42
YNL157W	IGO1	TFIID	TATA-less	2	-1.957	0.348	0.552	0.63	0.48	-0.394
YNR017W	TIM23	TFIID	TATA-less	2	-1.134	-0.042	0.043	0.371	0.258	-0.524
YOL082W	ATG19	TFIID		2	-1.191	0.248	0.102	1.107	0.875	-0.339
YBR248C	HIS7	TFIID	TATA-less	2	-1.629	-0.008	-0.293	0.545	0.61	0.163
YDR524C	AGE1	TFIID	TATA-less	2	-1.159	0.156	0.222	3.564	5.577	0.646
YCR037C	PHO87	TFIID	TATA-less	2	-0.65	0.1	0.151	0.223	0.106	-1.076
YHL027W	RIM101	TFIID	TATA-less	2	-1.118	0.165	0.085	0.512	0.415	-0.303
YHL020C	OPI1	TFIID	TATA-less	2	-1.383	0.091	-0.066	0.723	0.71	-0.026
YLR410W	VIP1	TFIID	TATA-less	2	-1.112	0.13	0.067	0.297	0.251	-0.246
YOR316C	COT1	TFIID		2	-1.1	0.066	-0.067	0.395	0.416	0.075
YKR016W	MIC60	TFIID	TATA-less	2	-1.703	0.13	-0.236	0.401	0.356	-0.173
YBR047W	FMP23	TFIID		2	-1.504	-0.228	-0.772	0.307	0.39	0.345
YBR151W	APD1	TFIID	TATA-less	2	-0.853	0.114	-0.11	0.367	0.311	-0.24
YOR051C	ETT1	TFIID	TATA-less	2	-1.045	-0.069	-0.056	0.153	0.259	0.759
YJR096W	YJR096W	TFIID	TATA-less	2	-1.741	0.029	-0.017	0.363	0.419	0.205
YNR033W	ABZ1	TFIID	TATA-containing	2	-1.303	0.274	-0.179	0.503	0.635	0.337
YDL132W	CDC53	TFIID		2	-1.305	0.71	-0.233	0.913	0.96	0.074
YJR008W	MHO1	TFIID		2	0.26	-0.059	0.764	0.103	0.028	-1.894
YDR213W	UPC2	TFIID		2	-1.283	-0.057	-0.451	0.776	1.003	0.369
YPL218W	SAR1	TFIID	TATA-less	2	-1.53	0.126	-0.053	0.366	0.362	-0.015
YEL042W	GDA1	TFIID	TATA-less	2	-1.196	0.145	-0.243	0.499	0.387	-0.367
YNL016W	PUB1	TFIID		2	-1.216	0.241	0.187	0.321	0.286	-0.168
YDL052C	SLC1	TFIID	TATA-less	2	-1.58	-0.035	0.075	0.572	0.478	-0.259
YPR181C	SEC23	TFIID	TATA-less	2	-1.217	0.088	0.251	0.585	0.446	-0.39
YKR043C	SHB17	TFIID	TATA-less	2	-0.96	-0.088	0.539	0.142	0.1	-0.499
YBL005W	PDR3	TFIID	TATA-less	2	-0.639	0.263	0.315	0.196	0.17	-0.203
YOR114W	YOR114W	TFIID		2	-1.689	0.285	-0.594	0.534	1.083	1.02
YDL046W	NPC2	TFIID	TATA-containing	2	-1.199	0.22	0.172	0.458	0.407	-0.171
YBR093C	PHO5	TFIID	TATA-containing	2	-1.544	0.27	0.243	0.478	0.448	-0.092
YJL002C	OST1	TFIID	TATA-less	2	-1.32	0.018	0.176	0.722	0.406	-0.83
YJL217W	REE1	TFIID	TATA-less	2	-1.807	0.253	-0.999	0.675	1.097	0.701
YGR191W	HIP1	TFIID	TATA-less	2	-1.116	0.001	0.377	0.329	0.367	0.155
YDR248C	YDR248C	TFIID	TATA-containing	2	-1.031	-0.361	0.043	0.854	0.462	-0.887
YNL154C	YCK2	TFIID		2	-1.434	0.211	0.228	0.665	0.571	-0.22
YOR099W	KTR1	TFIID	TATA-less	2	-1.362	0.353	-0.085	0.936	0.375	-1.32
YGL231C	EMC4	TFIID		2	-2.06	0.138	-0.276	0.351	0.441	0.328
YDR298C	ATP5	TFIID	TATA-less	2	-1.868	0.083	0.033	0.447	0.403	-0.149
YKL218C	SRY1	TFIID		2	-1.618	-0.378	-1.482	1.056	0.655	-0.689
YGL194C-A	YGL194C-A	TFIID	TATA-less	2	-1.704	-0.008	-0.016	0.91	0.539	-0.755
YER141W	COX15	TFIID	TATA-less	2	-2.063	0.367	0.227	0.924	0.431	-1.101
YGR124W	ASN2	TFIID	TATA-less	2	-1.592	0.16	0.077	0.607	0.46	-0.398
YHR149C	SKG6	TFIID	TATA-less	2	-1.157	0.243	-0.333	0.342	0.208	-0.716
YHR152W	SPO12	TFIID		2	-1.609	0.187	-0.05	0.286	0.351	0.294
YLR301W	HRI1	TFIID	TATA-less	2	-1.054	0.054	0.04	1.286	2.202	0.776
YOL017W	ESC8	TFIID	TATA-less	2	-1.299	0.026	-0.552	0.359	0.325	-0.143
YNL283C	WSC2	TFIID	TATA-less	2	-1.128	0.197	-0.115	0.585	0.469	-0.319
YPL032C	SVL3	TFIID	TATA-less	2	-1.23	0.203	0.024	1.718	1.322	-0.378
YER075C	PTP3	TFIID	TATA-less	2	-1.634	0.123	-0.253	0.566	0.618	0.129
YPR122W	AXL1	CR	TATA-less	2	-1.112	0.017	-0.484	0.727	0.186	-1.967
YFL038C	YPT1	TFIID	TATA-less	2	-1.549	-0.116	0.377	0.481	0.307	-0.649
YDR071C	PAA1	TFIID	TATA-less	2	-1.488	-0.109	0.189	0.525	0.781	0.573
YER165W	PAB1	TFIID		2	-1.547	0.225	0.399	0.551	0.518	-0.089
YGR241C	YAP1802	TFIID	TATA-less	2	-1.337	0.14	-0.063	0.49	0.525	0.101
YGR009C	SEC9	TFIID	TATA-containing	2	-1.594	0.174	-0.429	0.559	0.458	-0.287
YPL226W	NEW1	TFIID	TATA-less	2	-1.512	0.32	0.27	0.498	0.46	-0.115
YGR162W	TIF4631	TFIID	TATA-less	2	-1.375	0.195	0.262	0.591	0.453	-0.384
YMR079W	SEC14	TFIID	TATA-less	2	-1.448	0.145	0.175	0.806	0.422	-0.933
YLL043W	FPS1	TFIID	TATA-less	2	-1.385	0.176	-0.054	0.559	0.427	-0.39
YER133W	GLC7	TFIID	TATA-less	2	-1.443	0.171	0.423	0.412	0.247	-0.738
YBR296C	PHO89	CR	TATA-containing	2	-0.67	-0.407	-1.882	0.344	1.998	2.538
YDL015C	TSC13	TFIID	TATA-less	2	-1.599	-0.039	0.036	0.25	0.271	0.117
YMR188C	MRPS17	TFIID	TATA-less	2	-1.218	-0.162	-0.234	0.676	0.4	-0.755
YER146W	LSM5	TFIID	TATA-less	2	-2.059	0.388	-0.081	0.628	0.974	0.634
YER169W	RPH1	TFIID	TATA-less	2	-1.289	0.125	-0.083	0.652	0.556	-0.232
YMR253C	YMR253C	TFIID	TATA-less	2	-1.151	-0.135	-0.466	0.605	0.529	-0.194
YOR288C	MPD1	TFIID		2	-1.255	0.308	-0.593	0.492	0.284	-0.795
YOR008C	SLG1	TFIID	TATA-less	2	-1.979	-0.022	-0.381	0.685	0.462	-0.568
YJL213W	YJL213W	TFIID	TATA-containing	2	-1.272	-0.027	-0.51	0.497	0.583	0.23
YCR009C	RVS161	TFIID	TATA-less	2	-0.943	-0.369	-0.204	0.426	0.199	-1.097
YEL017W	GTT3	TFIID	TATA-less	2	-1.375	0.168	-0.355	0.556	0.721	0.375
YJR074W	MOG1	TFIID		2	-2.181	-0.566	-0.285	0.58	0.401	-0.534
YMR191W	SPG5	TFIID	TATA-containing	2	-1.635	0.322	-0.675	0.921	0.843	-0.128
YDL047W	SIT4	TFIID	TATA-less	2	-1.365	0.149	0.174	0.662	0.579	-0.193
YGL087C	MMS2	TFIID	TATA-less	2	-0.481	0.018	0.711	0.064	0.021	-1.588
YLL056C	YLL056C	TFIID		2	-2.259	0.555	-0.743	1.246	1.262	0.019
YPL144W	POC4	TFIID	TATA-less	2	-1.48	0.105	0.261	0.298	0.303	0.025
YGL122C	NAB2	TFIID	TATA-less	2	-1.203	0.137	0.359	0.428	0.294	-0.54
YER152C	YER152C	TFIID		2	-1.524	-0.037	-0.288	0.919	0.733	-0.326
YHL047C	ARN2	CR	TATA-less	2	-0.924	0.089	-0.231	0.716	0.966	0.432
YER019W	ISC1	TFIID	TATA-less	2	-1.376	-0.018	0.192	0.305	0.271	-0.173
YBR135W	CKS1	TFIID	TATA-containing	2	-1.475	0.003	-0.416	0.818	0.64	-0.354
YJL042W	MHP1	TFIID	TATA-less	2	-1.448	0.186	-0.088	0.684	0.458	-0.579
YGL009C	LEU1	TFIID	TATA-less	2	-1.236	0.138	-0.237	0.428	0.529	0.304
YEL027W	VMA3	TFIID	TATA-less	2	-1.477	0.18	0.31	0.355	0.164	-1.116
YFL016C	MDJ1	TFIID	TATA-less	2	-1.304	0.019	-0.026	0.32	0.36	0.172
YPL260W	YPL260W	TFIID	TATA-less	2	-1.219	0.206	0.076	0.502	0.265	-0.923
YCR082W	AHC2	TFIID	TATA-containing	2	-2.28	-0.129	-0.44	0.62	0.486	-0.349
YHR154W	RTT107	TFIID	TATA-less	2	-1.053	0.069	-0.4	0.941	0.591	-0.67
YGL021W	ALK1	TFIID	TATA-less	2	-1.381	0.249	-0.135	0.788	0.63	-0.322
YPR036W	VMA13	TFIID	TATA-less	2	-1.091	0.151	0.207	0.533	0.638	0.26
YOR224C	RPB8	TFIID	TATA-containing	2	-1.701	0.052	0.482	0.494	1.001	1.018
YHR020W	YHR020W	TFIID	TATA-containing	2	-1.3	0.333	0.104	0.387	0.229	-0.758
YAL053W	FLC2	TFIID	TATA-less	2	-1.373	0.221	-0.316	0.272	0.453	0.737
YNL011C	YNL011C	TFIID	TATA-less	2	-1.525	-0.115	-0.38	0.666	0.661	-0.01
YKL065C	YET1	TFIID	TATA-less	2	-1.414	-0.093	0.034	0.666	0.372	-0.839
YGL108C	YGL108C	TFIID	TATA-containing	2	-1.945	-0.169	-0.449	0.62	0.84	0.439
YJL154C	VPS35	TFIID	TATA-less	2	-1.344	0.217	0.031	0.442	0.644	0.542
YGR185C	TYS1	TFIID	TATA-less	2	-1.549	0.172	0.311	0.288	0.296	0.042
YDL232W	OST4	TFIID	TATA-less	2	-2.186	0.204	0.028	0.536	0.535	-0.004
YDR483W	KRE2	TFIID	TATA-less	2	-1.093	0.03	0.207	0.444	0.281	-0.664
YER178W	PDA1	TFIID	TATA-less	2	-1.21	0.013	0.227	0.407	0.581	0.514
YKL100C	YPF1	TFIID	TATA-less	2	-1.184	-0.004	0.094	0.526	0.219	-1.264
YPL234C	VMA11	TFIID	TATA-less	2	-1.785	-0.163	-0.04	0.494	0.429	-0.204
YOR349W	CIN1	TFIID	TATA-less	2	-1.637	-0.011	-0.571	1.1	1.118	0.024
YER122C	GLO3	TFIID	TATA-containing	2	-1.465	0.223	0.233	0.296	0.159	-0.9
YIL047C	SYG1	TFIID	TATA-less	2	-1.136	0.142	0.13	0.405	0.448	0.143
YMR243C	ZRC1	TFIID	TATA-less	2	-1.149	0.027	0.05	0.436	0.342	-0.352
YDR231C	COX20	TFIID	TATA-less	2	-1.763	-0.091	-0.578	0.608	0.505	-0.268
YGR127W	YGR127W	TFIID		2	-1.546	0.297	-0.057	0.517	0.337	-0.617
YPL232W	SSO1	TFIID	TATA-less	2	-1.61	0.208	0.084	0.266	0.19	-0.485
YLR223C	IFH1	TFIID	TATA-less	2	-1.309	0.027	-0.102	0.494	0.577	0.224
YHR005C-A	TIM10	TFIID	TATA-less	2	-1.068	-0.034	0.175	0.765	1.389	0.861
YOL048C	RRT8	TFIID	TATA-less	2	-1.536	0.128	-0.399	0.234	0.287	0.294
YBR086C	IST2	TFIID	TATA-less	2	-1.262	0.246	0.133	0.392	0.22	-0.833
YPL159C	PET20	TFIID	TATA-less	2	-1.66	0.02	-0.127	0.542	0.693	0.356
YDR448W	ADA2	TFIID	TATA-containing	2	-1.293	0.157	0.006	0.55	0.401	-0.454
YOR036W	PEP12	TFIID	TATA-containing	2	-1.75	-0.114	-0.243	0.525	0.284	-0.888
YPR016C	TIF6	TFIID	TATA-less	2	-1.459	0.194	0.233	0.532	0.352	-0.597
YDL174C	DLD1	TFIID	TATA-containing	2	-1.467	0.004	-0.108	0.51	0.425	-0.263
YPL212C	PUS1	TFIID	TATA-less	2	-1.316	0.211	-0.007	0.308	0.223	-0.468
YIL118W	RHO3	TFIID	TATA-less	2	-0.925	-0.01	0.044	0.268	0.291	0.117
YOL038W	PRE6	TFIID	TATA-less	2	-1.642	0.238	0.398	0.423	0.249	-0.762
YPL157W	TGS1	TFIID	TATA-less	2	-0.703	0.235	0.492	0.192	0.079	-1.279
YCR089W	FIG2	TFIID	TATA-less	2	-1.33	0.018	-0.374	0.81	0.872	0.107
YOR151C	RPB2	TFIID	TATA-less	2	-1.252	0.202	0.181	0.551	0.218	-1.336
YBR004C	GPI18	TFIID		2	-1.87	0.442	-0.321	0.445	0.396	-0.167
YMR110C	HFD1	TFIID	TATA-containing	2	-1.332	0.148	-0.077	0.253	0.274	0.111
YMR071C	TVP18	TFIID	TATA-less	2	-1.566	0.155	0.985	0.263	0.135	-0.957
YDR293C	SSD1	TFIID	TATA-less	2	-1.213	0.191	0.076	1.124	0.74	-0.603
YDL065C	PEX19	TFIID	TATA-less	2	-1.616	0.263	0.338	0.323	0.282	-0.195
YNL068C	FKH2	TFIID	TATA-less	2	-1.429	0.192	-0.271	0.335	0.413	0.302
YOL122C	SMF1	CR		2	-1.558	-0.137	0.203	0.449	0.277	-0.697
YGR078C	PAC10	TFIID	TATA-less	2	-1.688	0.092	0.367	0.477	0.479	0.006
YJR001W	AVT1	TFIID	TATA-containing	2	-1.536	0.2	0.061	0.6	0.467	-0.361
YDL137W	ARF2	TFIID		2	-1.275	-0.068	0.399	0.35	0.323	-0.116
YMR295C	YMR295C	TFIID	TATA-less	2	-1.908	0.317	0.258	0.687	0.958	0.479
YOR246C	ENV9	TFIID	TATA-containing	2	-1.418	0.123	-0.11	0.781	0.641	-0.286
YOL139C	CDC33	TFIID	TATA-less	2	-1.786	0.201	0.239	0.531	0.451	-0.235
YJL200C	ACO2	TFIID	TATA-less	2	-1.483	-0.023	-0.706	0.728	0.415	-0.81
YDR441C	APT2	TFIID	TATA-containing	2	-2.061	0.279	-0.33	0.875	0.668	-0.39
YJR117W	STE24	TFIID	TATA-less	2	-1.597	0.047	-0.128	0.472	0.598	0.341
YNL102W	POL1	TFIID	TATA-less	2	-1.163	0.037	-0.278	0.56	0.481	-0.22
YMR013C	SEC59	TFIID	TATA-less	2	-1.442	-0.048	-0.236	0.612	0.495	-0.305
YHR103W	SBE22	TFIID	TATA-less	2	-1.372	0.232	-0.041	0.765	0.519	-0.56
YMR278W	PRM15	TFIID	TATA-containing	2	-1.441	0.17	-0.274	0.735	0.776	0.078
YIL106W	MOB1	TFIID		2	-1.749	0.099	0.03	0.202	0.3	0.571
YPL003W	ULA1	TFIID	TATA-less	2	-1.683	-0.04	-0.321	0.5	0.404	-0.309
YOR089C	VPS21	TFIID	TATA-containing	2	-1.666	-0.127	-0.149	0.514	0.391	-0.395
YPL225W	YPL225W	TFIID	TATA-less	2	-2.048	0.219	0.098	0.455	0.339	-0.422
YMR263W	SAP30	TFIID	TATA-containing	2	-1.827	0.108	-0.595	0.5	0.507	0.019
YKL184W	SPE1	TFIID	TATA-less	2	-1.489	0.299	0.114	0.535	0.6	0.166
YNL169C	PSD1	CR	TATA-containing	2	-1.516	0.339	-0.39	0.959	0.484	-0.986
YIL142W	CCT2	TFIID	TATA-less	2	-1.634	0.003	0.083	0.379	0.359	-0.075
YPL273W	SAM4	TFIID	TATA-less	2	-1.519	0.103	-0.015	0.588	0.63	0.101
YHR023W	MYO1	TFIID	TATA-less	2	-1.368	0.112	-0.155	0.65	0.74	0.188
YDR350C	ATP22	TFIID	TATA-less	2	-1.484	0.085	-0.168	0.543	0.383	-0.502
YCL024W	KCC4	TFIID	TATA-less	2	-1.041	-0.118	-0.977	0.6	1.513	1.335
YOR311C	DGK1	TFIID	TATA-containing	2	-1.323	-0.096	-0.068	0.883	1.243	0.493
YDR129C	SAC6	TFIID	TATA-less	2	-1.417	0.027	0.174	0.641	0.404	-0.666
YOR045W	TOM6	TFIID	TATA-less	2	-2.322	0.223	0.05	0.84	0.538	-0.642
YDR169C	STB3	TFIID	TATA-less	2	-1.45	0.321	-0.037	0.596	0.604	0.018
YFR014C	CMK1	TFIID		2	-1.82	-0.219	-0.892	0.545	0.956	0.811
YDL101C	DUN1	TFIID	TATA-less	2	-1.341	0.278	-0.107	0.521	0.573	0.139
YER086W	ILV1	TFIID	TATA-less	2	-1.416	0.058	-0.299	0.653	1.133	0.794
YPL190C	NAB3	TFIID	TATA-less	2	-1.383	0.232	0.292	0.57	0.6	0.074
YGR054W	YGR054W	TFIID	TATA-less	2	-1.289	0.161	0.147	0.441	0.374	-0.238
YGL058W	RAD6	TFIID	TATA-less	2	-1.674	0.375	0.129	0.496	0.585	0.238
YML017W	PSP2	TFIID	TATA-less	2	-1.192	0.116	-0.046	0.671	0.6	-0.162
YLR353W	BUD8	TFIID	TATA-less	2	-1.246	-0.02	-0.153	0.264	0.192	-0.46
YLR131C	ACE2	TFIID	TATA-less	2	-1.402	0.135	-0.167	0.595	0.382	-0.641
YPL242C	IQG1	TFIID	TATA-less	2	-1.451	0.312	-0.066	0.462	0.323	-0.514
YDL078C	MDH3	TFIID	TATA-containing	2	-1.44	0.011	-0.605	0.574	0.297	-0.951
YGL200C	EMP24	TFIID	TATA-less	2	-1.628	-0.05	-0.194	0.387	0.36	-0.101
YMR010W	YMR010W	TFIID	TATA-less	2	-1.511	0.298	0.014	0.556	0.718	0.37
YGL196W	DSD1	TFIID		2	-1.753	0.082	0.261	0.539	0.651	0.272
YNL155W	CUZ1	TFIID	TATA-less	2	-1.589	0.13	-0.163	0.281	0.323	0.201
YDR012W	RPL4B	TFIID	TATA-less	2	-1.389	0.162	0.452	0.361	0.235	-0.621
YMR203W	TOM40	TFIID	TATA-less	2	-1.432	0.165	0.348	0.391	0.357	-0.13
YAL007C	ERP2	TFIID	TATA-less	2	-1.633	0.268	0.058	0.465	0.402	-0.209
YDR228C	PCF11	TFIID	TATA-less	2	-1.721	0.162	-0.195	0.836	0.72	-0.215
YLR219W	MSC3	TFIID	TATA-less	2	-1.389	0.22	-0.009	0.429	0.335	-0.356
YMR216C	SKY1	TFIID	TATA-less	2	-1.375	0.183	0.245	0.513	0.319	-0.682
YPR041W	TIF5	TFIID	TATA-less	2	-1.565	0.121	0.087	0.308	0.242	-0.348
YGR285C	ZUO1	TFIID	TATA-less	2	-1.645	0.221	0.483	0.259	0.286	0.142
YDL086W	YDL086W	TFIID	TATA-containing	2	-1.833	-0.042	-0.041	0.533	0.46	-0.212
YDL131W	LYS21	TFIID	TATA-containing	2	-1.437	0.18	0.079	0.615	0.439	-0.487
YJL192C	SOP4	TFIID	TATA-less	2	-1.494	0.284	-0.326	0.514	0.337	-0.609
YNR013C	PHO91	TFIID	TATA-less	2	-1.174	0.17	-0.182	0.337	0.38	0.175
YIL045W	PIG2	TFIID		2	-1.241	0.171	-0.685	0.441	0.663	0.587
YPL237W	SUI3	TFIID	TATA-less	2	-1.817	0.364	0.199	0.482	0.586	0.283
YML012W	ERV25	TFIID	TATA-less	2	-1.761	0.213	0.397	0.545	0.435	-0.326
YOR219C	STE13	TFIID	TATA-less	2	-1.599	0.002	-0.326	0.549	0.567	0.048
YER136W	GDI1	TFIID	TATA-less	2	-1.37	0.181	0.161	0.644	0.552	-0.223
YCR084C	TUP1	TFIID	TATA-less	2	-1.134	0.126	0.165	0.835	0.587	-0.51
YIL043C	CBR1	TFIID	TATA-containing	2	-1.845	0.169	-0.024	0.641	0.395	-0.697
YIL033C	BCY1	TFIID	TATA-less	2	-1.407	-0.029	-0.09	0.424	0.374	-0.18
YBR104W	YMC2	TFIID	TATA-less	2	-0.948	-0.185	-0.121	0.385	0.104	-1.89
YJL127C-B	YJL127C-B	TFIID	TATA-less	2	-1.477	-0.162	-0.239	0.755	0.579	-0.384
YDR245W	MNN10	TFIID	TATA-less	2	-1.508	0.41	0.195	0.445	0.546	0.295
YEL036C	ANP1	TFIID	TATA-less	2	-1.391	0.057	-0.145	0.418	0.655	0.647
YLR126C	YLR126C	TFIID	TATA-less	2	-1.434	0.054	-0.678	0.565	0.142	-1.996
YOL064C	MET22	TFIID	TATA-less	2	-2.084	0.049	-0.107	1.031	0.702	-0.554
YPL204W	HRR25	TFIID	TATA-less	2	-1.556	0.246	0.321	0.64	0.464	-0.465
YMR074C	YMR074C	CR	TATA-less	2	-2.203	0.048	-0.098	0.958	0.748	-0.358
YBR290W	BSD2	TFIID	TATA-containing	2	-2.024	0.51	0.267	0.593	0.574	-0.047
YOR319W	HSH49	TFIID	TATA-less	2	-1.936	0.162	-0.1	0.366	0.904	1.306
YHR061C	GIC1	TFIID		2	-1.438	0.148	-0.033	0.47	0.316	-0.575
YOL060C	MAM3	TFIID	TATA-less	2	-1.469	0.105	-0.008	0.399	0.526	0.397
YPL050C	MNN9	TFIID	TATA-less	2	-1.661	0.103	0.207	0.654	0.958	0.551
YDL185W	VMA1	TFIID	TATA-less	2	-1.262	0.095	0.273	0.231	0.136	-0.767
YGL010W	MPO1	TFIID	TATA-less	2	-1.608	0.211	0.175	0.491	0.359	-0.452
YKL077W	YKL077W	TFIID	TATA-less	2	-1.503	0.174	-0.017	0.448	0.25	-0.838
YGR222W	PET54	CR	TATA-less	2	-1.168	0.276	0.165	0.775	1.093	0.496
YDR411C	DFM1	TFIID	TATA-less	2	-1.722	0.073	-0.032	0.698	0.751	0.106
YLR330W	CHS5	TFIID	TATA-less	2	-1.192	0.005	-0.154	0.394	0.366	-0.107
YCL038C	ATG22	TFIID	TATA-less	2	-1.531	-0.059	-0.346	0.76	0.913	0.264
YBR085W	AAC3	TFIID	TATA-less	2	-1.279	-0.122	-1.358	0.527	0.726	0.462
YOR332W	VMA4	TFIID	TATA-containing	2	-1.725	0.047	0.206	0.369	0.251	-0.559
YOL004W	SIN3	TFIID	TATA-less	2	-1.304	0.239	0.148	0.437	0.346	-0.336
YML078W	CPR3	TFIID		2	-2.291	-0.326	-0.086	0.556	0.303	-0.876
YOL077W-A	ATP19	TFIID	TATA-less	2	-2.401	0.158	-0.124	0.683	0.744	0.122
YOL036W	YOL036W	TFIID	TATA-less	2	-1.23	0.113	-0.203	1.837	0.837	-1.134
YNL103W	MET4	TFIID	TATA-less	2	-1.568	0.19	0.142	0.583	0.617	0.081
YDL147W	RPN5	TFIID	TATA-less	2	-1.43	0.33	0.308	0.515	0.25	-1.042
YGL040C	HEM2	TFIID	TATA-containing	2	-1.955	0.459	0.226	0.443	0.523	0.238
YNR028W	CPR8	TFIID		2	-1.312	-0.1	-0.552	0.345	0.267	-0.367
YBR207W	FTH1	TFIID	TATA-less	2	-1.444	0.083	0.19	0.527	0.348	-0.6
YDR408C	ADE8	TFIID	TATA-less	2	-1.385	0.085	0.274	1.391	1.736	0.32
YDL133W	SRF1	TFIID		2	-1.295	-0.015	0.01	0.463	0.458	-0.015
YGL186C	TPN1	TFIID	TATA-containing	2	-1.784	0.065	-0.264	0.544	0.395	-0.461
YNL255C	GIS2	TFIID	TATA-less	2	-1.997	0.207	0.414	0.824	0.837	0.023
YER068W	MOT2	TFIID	TATA-less	2	-1.361	0.278	0.067	0.435	0.42	-0.051
YOR310C	NOP58	TFIID	TATA-less	2	-1.358	0.076	0.16	0.48	0.368	-0.384
YDR093W	DNF2	TFIID	TATA-less	2	-1.293	0.07	-0.201	0.581	0.494	-0.232
YDR405W	MRP20	TFIID	TATA-less	2	-1.192	-0.065	0.038	0.359	0.5	0.477
YOR301W	RAX1	TFIID	TATA-less	2	-1.573	0.158	0.241	1.568	0.949	-0.724
YBL035C	POL12	TFIID	TATA-containing	2	-1.241	0.15	-0.24	0.606	0.271	-1.159
YPL220W	RPL1A	TFIID	TATA-less	2	-1.175	0.052	0.416	0.431	0.293	-0.556
YGR061C	ADE6	TFIID	TATA-less	2	-1.315	0.118	0.012	0.505	0.338	-0.579
YOL032W	OPI10	TFIID	TATA-less	2	-1.642	-0.074	0.092	0.336	0.167	-1.004
YKR092C	SRP40	TFIID	TATA-less	2	-1.254	0.351	0.171	0.605	0.386	-0.648
YDR261C	EXG2	TFIID	TATA-containing	2	-1.441	0.144	0.248	0.57	0.151	-1.915
YDR098C	GRX3	TFIID	TATA-less	2	-1.626	-0.073	-0.15	0.423	0.551	0.382
YHR068W	DYS1	TFIID	TATA-less	2	-1.663	0.247	-0.072	0.525	0.478	-0.137
YDL236W	PHO13	TFIID	TATA-less	2	-1.737	0.146	-0.17	0.397	0.631	0.668
YHR006W	STP2	TFIID	TATA-less	2	-1.549	0.238	0.274	0.351	0.331	-0.085
YOL100W	PKH2	TFIID	TATA-less	2	-1.47	0.234	-0.112	0.365	0.612	0.745
YDR341C	YDR341C	TFIID	TATA-less	2	-1.947	0.126	-0.193	0.559	0.762	0.446
YDL004W	ATP16	TFIID	TATA-less	2	-1.616	0.206	0.191	0.382	0.212	-0.853
YMR252C	YMR252C	TFIID		2	-0.246	0.11	0.562	0.23	0.098	-1.231
YDR244W	PEX5	TFIID	TATA-containing	2	-1.354	0.107	-0.242	0.593	0.517	-0.196
YIR033W	MGA2	TFIID	TATA-less	2	-1.575	0.467	-0.179	0.646	0.636	-0.023
YHR175W	CTR2	CR	TATA-less	2	-0.009	-0.409	0.585	5.824	26.007	2.159
YJL103C	GSM1	TFIID		2	-1.406	-0.114	-1.208	0.721	0.727	0.012
YNL118C	DCP2	TFIID	TATA-less	2	-1.244	0.23	0.192	0.649	0.47	-0.466
YAL013W	DEP1	TFIID	TATA-less	2	-1.529	-0.254	-0.026	0.464	0.602	0.376
YLR314C	CDC3	TFIID	TATA-less	2	-1.181	0.029	-0.082	0.526	0.36	-0.546
YER155C	BEM2	TFIID	TATA-less	2	-1.351	0.209	0.051	0.237	0.283	0.256
YLR455W	PDP3	TFIID	TATA-less	2	-1.287	0.302	-0.127	0.471	0.28	-0.749
YMR072W	ABF2	TFIID	TATA-less	2	-2.134	0.139	0.186	0.253	0.167	-0.605
YBL103C	RTG3	TFIID	TATA-less	2	-1.2	0.116	-0.227	0.535	0.382	-0.484
YPL052W	OAZ1	TFIID		2	-1.986	-0.051	-0.369	0.349	0.744	1.092
YLL061W	MMP1	CR	TATA-containing	2	-1.306	-0.285	-1.127	0.663	1.032	0.637
YDR294C	DPL1	TFIID	TATA-containing	2	-1.384	-0.061	-0.444	0.319	0.394	0.302
YLR001C	YLR001C	TFIID	TATA-less	2	-1.35	0.121	-0.483	0.144	0.264	0.881
YKL009W	MRT4	TFIID	TATA-less	2	-1.288	-0.045	0.459	0.332	0.21	-0.665
YDR264C	AKR1	TFIID	TATA-less	2	-1.073	0.151	0.049	0.561	0.365	-0.62
YNL047C	SLM2	TFIID	TATA-less	2	-1.235	0.211	-0.256	0.597	0.644	0.11
YNL123W	NMA111	TFIID	TATA-less	2	-1.287	0.037	-0.146	0.737	0.363	-1.023
YBR041W	FAT1	TFIID		2	-1.631	0.009	-0.339	0.367	0.45	0.294
YHL007C	STE20	TFIID		2	-1.553	0.047	0.114	0.664	0.428	-0.634
YCL037C	SRO9	TFIID	TATA-less	2	-1.547	0.272	0.375	0.504	0.376	-0.424
YPR003C	YPR003C	TFIID	TATA-containing	2	-1.076	-0.172	-1.078	1.209	0.652	-0.891
YJL201W	ECM25	TFIID	TATA-less	2	-1.584	-0.14	-0.142	1.634	0.527	-1.633
YDL208W	NHP2	TFIID	TATA-less	2	-1.964	-0.018	0.295	0.566	0.465	-0.284
YJL062W-A	COA3	TFIID		2	-1.782	-0.657	0.279	0.772	1.145	0.569
YGR119C	NUP57	TFIID	TATA-less	2	-1.516	0.215	0.495	0.46	0.174	-1.4
YOR007C	SGT2	TFIID	TATA-less	2	-1.963	0.231	0.225	0.393	0.433	0.141
YPL207W	TYW1	TFIID	TATA-containing	2	-1.394	0.272	-0.3	0.612	1.012	0.726
YOR101W	RAS1	TFIID	TATA-less	2	-1.688	0.052	-0.144	1.063	0.796	-0.417
YAL023C	PMT2	TFIID	TATA-less	2	-1.361	0.193	0.032	0.633	0.383	-0.725
YNL197C	WHI3	TFIID	TATA-less	2	-1.401	0.253	0.266	0.324	0.349	0.104
YNR030W	ALG12	TFIID	TATA-less	2	-1.943	0.363	-0.544	0.484	0.551	0.186
YDL235C	YPD1	TFIID	TATA-less	2	-1.86	0.377	0.017	0.683	0.365	-0.903
YBR164C	ARL1	TFIID	TATA-containing	2	-1.647	0.279	-0.034	0.415	0.282	-0.558
YPL112C	PEX25	TFIID	TATA-containing	2	-1.6	0.229	-0.374	0.431	0.472	0.131
YFL036W	RPO41	TFIID	TATA-less	2	-1.488	0.232	-0.145	0.341	0.324	-0.077
YHL030W	ECM29	TFIID	TATA-less	2	-1.547	0.192	-0.199	0.283	0.256	-0.141
YLR328W	NMA1	TFIID	TATA-less	2	-1.343	0.083	-0.309	0.317	0.523	0.722
YGL256W	ADH4	TFIID	TATA-less	2	-1.88	0.022	-0.189	0.584	0.309	-0.919
YPL199C	YPL199C	TFIID	TATA-less	2	-1.844	0.349	-0.292	0.558	0.806	0.529
YBL101C	ECM21	TFIID		2	-1.432	0.023	-0.269	0.358	0.244	-0.553
YGR132C	PHB1	TFIID	TATA-containing	2	-1.659	0.29	0.013	0.579	0.494	-0.228
YKL190W	CNB1	TFIID	TATA-less	2	-1.662	-0.111	-0.193	0.458	0.424	-0.111
YMR024W	MRPL3	TFIID	TATA-containing	2	-1.656	-0.022	-0.197	0.803	0.65	-0.304
YBR201W	DER1	TFIID	TATA-less	2	-1.582	0.06	-0.911	0.732	0.137	-2.419
YBR198C	TAF5	TFIID	TATA-less	2	-1.079	0.221	0.421	0.3	0.164	-0.869
YNL199C	GCR2	TFIID	TATA-less	2	-1.569	0.494	0.051	0.46	0.534	0.216
YFR002W	NIC96	TFIID	TATA-less	2	-1.478	0.253	-0.079	0.416	0.56	0.431
YNL189W	SRP1	TFIID		2	-1.259	-0.037	-0.115	0.61	0.372	-0.714
YDR289C	RTT103	TFIID		2	-2.045	0.379	0.074	0.404	0.266	-0.603
YMR183C	SSO2	TFIID	TATA-less	2	-1.047	0.297	0.427	0.253	0.101	-1.329
YGR082W	TOM20	TFIID	TATA-less	2	-2.038	0.427	0.04	0.523	0.587	0.166
YDR140W	MTQ2	TFIID	TATA-containing	2	-1.768	-0.169	-0.369	0.274	0.485	0.822
YGR020C	VMA7	TFIID		2	-1.651	-0.357	0.052	0.394	0.308	-0.355
YBR127C	VMA2	TFIID	TATA-less	2	-1.479	0.144	0.2	0.305	0.109	-1.482
YGL211W	NCS6	TFIID	TATA-less	2	-1.981	0.124	-0.238	0.855	0.763	-0.165
YIL076W	SEC28	TFIID	TATA-less	2	-1.543	0.262	0.205	0.299	0.282	-0.081
YGR210C	YGR210C	TFIID	TATA-less	2	-1.651	-0.013	-0.153	0.718	0.566	-0.342
YMR258C	ROY1	TFIID	TATA-less	2	-1.744	0.329	0.095	0.545	0.358	-0.606
YPR098C	YPR098C	TFIID	TATA-less	2	-1.83	-0.116	-0.617	0.814	0.743	-0.131
YER025W	GCD11	TFIID	TATA-less	2	-1.698	0.118	0.176	0.69	0.546	-0.338
YJL165C	HAL5	TFIID		2	-1.634	0.032	-0.129	0.554	0.478	-0.214
YDR512C	EMI1	TFIID	TATA-less	2	-2.012	-0.8	-0.458	0.348	0.721	1.052
YGR264C	MES1	TFIID	TATA-less	2	-1.64	0.167	0.153	0.757	0.589	-0.36
YDL212W	SHR3	TFIID	TATA-containing	2	-1.935	0.021	-0.061	0.263	0.333	0.339
YDR028C	REG1	TFIID	TATA-less	2	-1.439	0.156	-0.02	0.586	0.533	-0.136
YPR124W	CTR1	TFIID	TATA-less	2	-2.859	-0.175	0.053	0.629	1.462	1.216
YJL102W	MEF2	TFIID	TATA-less	2	-1.185	-0.038	-0.425	0.297	0.403	0.442
YJL143W	TIM17	TFIID	TATA-less	2	-1.279	-0.288	0.193	0.446	0.3	-0.574
YIL078W	THS1	TFIID	TATA-less	2	-1.693	0.364	0.31	0.468	0.285	-0.716
YBR172C	SMY2	TFIID	TATA-less	2	-1.593	0.122	0.098	0.454	0.535	0.236
YEL032W	MCM3	TFIID	TATA-less	2	-1.644	0.242	-0.101	0.436	0.58	0.413
YJR007W	SUI2	TFIID	TATA-containing	2	-1.847	0.31	0.288	0.508	0.392	-0.375
YDR052C	DBF4	TFIID	TATA-less	2	-1.5	-0.203	-0.382	0.656	0.868	0.402
YBR154C	RPB5	TFIID	TATA-less	2	-1.922	0.096	0.212	0.29	0.28	-0.051
YER017C	AFG3	TFIID	TATA-less	2	-1.481	0.013	-0.043	1.011	0.769	-0.395
YDR103W	STE5	TFIID	TATA-less	2	-1.616	-0.052	-0.399	0.364	0.267	-0.447
YNL002C	RLP7	TFIID	TATA-less	2	-1.649	0.223	-0.024	0.389	0.2	-0.96
YNL322C	KRE1	TFIID	TATA-less	2	-1.537	-0.24	-0.142	0.377	0.265	-0.509
YDL160C	DHH1	TFIID	TATA-less	2	-1.452	0.263	0.266	0.347	0.244	-0.509
YNL056W	OCA2	TFIID	TATA-less	2	-1.01	0.109	0.686	0.167	0.082	-1.029
YGL238W	CSE1	TFIID	TATA-less	2	-1.659	0.144	-0.069	0.762	0.599	-0.348
YLR224W	YLR224W	TFIID	TATA-less	2	-1.791	0.122	0.431	0.133	0.152	0.191
YHR082C	KSP1	TFIID		2	-1.309	0.269	0.091	0.652	0.695	0.093
YOL116W	MSN1	CR	TATA-less	2	-1.807	-0.003	-0.102	1.035	1.976	0.933
YJL051W	IRC8	TFIID		2	-1.691	-0.063	-0.219	0.831	2.452	1.561
YFL018C	LPD1	TFIID	TATA-containing	2	-1.374	-0.135	-0.26	0.428	0.287	-0.578
YOR326W	MYO2	TFIID		2	-1.301	0.21	0.101	0.644	0.534	-0.271
YER049W	TPA1	TFIID	TATA-less	2	-1.544	0.138	-0.062	0.697	0.785	0.171
YPL255W	BBP1	TFIID		2	-1.523	0.364	-0.053	0.581	0.825	0.505
YGL133W	ITC1	TFIID	TATA-less	2	-1.593	0.198	-0.3	0.318	0.514	0.692
YPR109W	YPR109W	TFIID	TATA-containing	2	-1.913	0.174	0.205	0.268	0.311	0.218
YIL094C	LYS12	TFIID	TATA-containing	2	-1.572	-0.011	-0.09	0.324	0.22	-0.556
YPL093W	NOG1	TFIID	TATA-containing	2	-1.504	0.175	0.353	0.34	0.392	0.202
YNL045W	LAP2	TFIID		2	-1.415	-0.069	0.145	0.982	1.604	0.708
YBL011W	SCT1	TFIID	TATA-less	2	-1.707	0.154	0.021	0.514	0.455	-0.176
YER111C	SWI4	TFIID	TATA-less	2	-1.276	0.064	-0.427	0.657	0.506	-0.378
YEL052W	AFG1	TFIID	TATA-less	2	-2.049	-0.217	-0.982	0.802	0.219	-1.874
YOR078W	BUD21	TFIID	TATA-less	2	-1.8	0.211	0.276	0.709	0.333	-1.091
YFL022C	FRS2	TFIID	TATA-less	2	-1.466	0.101	0.054	0.642	0.587	-0.13
YDR272W	GLO2	TFIID	TATA-less	2	-1.865	0.221	-0.121	0.494	0.594	0.266
YML022W	APT1	TFIID	TATA-containing	2	-1.87	0.163	0.079	0.347	0.461	0.409
YPL184C	MRN1	TFIID		2	-1.421	0.075	-0.061	0.861	0.449	-0.938
YMR215W	GAS3	TFIID	TATA-containing	2	-1.139	-0.144	-0.15	0.719	0.388	-0.89
YNL221C	POP1	TFIID	TATA-less	2	-1.445	0.021	-0.236	0.599	0.578	-0.051
YKL211C	TRP3	TFIID	TATA-less	2	-1.775	0.088	-0.43	0.628	0.644	0.034
YDL134C	PPH21	TFIID		2	-1.302	0.083	0.321	1.915	2.504	0.386
YOL081W	IRA2	TFIID	TATA-less	2	-1.485	0.144	-0.11	0.623	0.412	-0.597
YLR006C	SSK1	TFIID	TATA-containing	2	-1.298	0.118	-0.269	0.364	0.419	0.204
YDR384C	ATO3	TFIID	TATA-less	2	-1.541	0.106	0.01	0.506	0.429	-0.236
YPR062W	FCY1	TFIID	TATA-less	2	-2.25	-0.1	-0.186	0.334	0.336	0.011
YHR026W	VMA16	TFIID	TATA-less	2	-1.85	0.278	0.326	0.721	0.591	-0.287
YOR210W	RPB10	TFIID	TATA-less	2	-1.898	-0.032	0.098	0.567	0.321	-0.819
YGL234W	ADE5,7	TFIID	TATA-less	2	-1.666	-0.028	-0.357	0.686	0.515	-0.414
YFL033C	RIM15	TFIID	TATA-less	2	-1.755	0.251	-0.481	1.257	1.011	-0.314
YLR197W	NOP56	TFIID	TATA-less	2	-1.483	0.114	0.182	0.564	0.411	-0.454
YDR091C	RLI1	TFIID	TATA-less	2	-1.489	0.228	-0.047	0.676	0.402	-0.75
YMR134W	ERG29	TFIID	TATA-containing	2	-1.806	0.394	-0.263	0.452	0.343	-0.4
YIL130W	ASG1	TFIID	TATA-less	2	-1.53	0.303	0.061	0.539	0.434	-0.312
YFR040W	SAP155	TFIID	TATA-less	2	-1.583	0.337	0.122	0.599	0.6	0.002
YOR341W	RPA190	TFIID	TATA-less	2	-1.441	0.24	0.092	0.592	0.468	-0.338
YNL287W	SEC21	TFIID	TATA-less	2	-1.448	0.221	0.157	0.771	0.631	-0.29
YGL048C	RPT6	TFIID	TATA-less	2	-1.794	0.046	0.031	0.389	0.394	0.019
YLL048C	YBT1	TFIID	TATA-containing	2	-1.618	0.426	-0.183	1.022	0.894	-0.193
YCR030C	SYP1	TFIID	TATA-less	2	-1.439	0.181	-0.098	0.665	0.312	-1.092
YCL012C	YCL012C	TFIID		2	-1.692	-0.168	-0.589	0.732	1.088	0.571
YDR518W	EUG1	TFIID	TATA-less	2	-1.313	-0.114	-0.297	1.25	1.166	-0.1
YAR002W	NUP60	TFIID	TATA-less	2	-1.729	-0.046	-0.117	0.357	0.379	0.086
YPL247C	YPL247C	TFIID		2	-1.089	-0.32	-0.692	0.735	0.333	-1.141
YGR198W	YPP1	TFIID	TATA-less	2	-1.473	0.156	-0.14	0.681	0.402	-0.762
YGL101W	YGL101W	TFIID	TATA-containing	2	-1.313	0.146	0.552	2.558	6.065	1.246
YHR002W	LEU5	TFIID	TATA-less	2	-1.99	0.391	-0.164	0.322	0.346	0.104
YPL116W	HOS3	TFIID	TATA-less	2	-1.423	0.162	-0.064	0.333	0.294	-0.18
YDL195W	SEC31	TFIID		2	-1.443	0.092	0.221	0.64	0.49	-0.387
YJL111W	CCT7	TFIID	TATA-less	2	-1.48	0.179	0.184	0.421	0.377	-0.159
YJL149W	DAS1	TFIID	TATA-containing	2	-0.916	0.094	0.576	0.147	0.113	-0.386
YPL053C	KTR6	TFIID	TATA-containing	2	-1.59	-0.032	-0.268	0.586	0.473	-0.309
YLR417W	VPS36	TFIID	TATA-less	2	-1.514	0.166	-0.505	0.288	0.391	0.442
YIL050W	PCL7	TFIID	TATA-containing	2	-1.443	0.054	-0.082	0.84	1.037	0.304
YNL243W	SLA2	TFIID	TATA-containing	2	-1.634	0.142	0.175	0.273	0.33	0.272
YDL138W	RGT2	TFIID	TATA-less	2	-1.412	0.23	0.151	0.186	0.322	0.793
YDL215C	GDH2	TFIID	TATA-less	2	-1.856	0.124	0.026	0.881	0.801	-0.139
YML125C	PGA3	TFIID	TATA-less	2	-1.622	-0.054	0.158	0.476	0.352	-0.436
YPR183W	DPM1	TFIID	TATA-less	2	-2.053	0.121	0.248	0.339	0.355	0.065
YER065C	ICL1	TFIID	TATA-less	2	-1.019	0.067	0.328	0.572	1.416	1.309
YGL220W	FRA2	TFIID		2	-1.941	0.06	-0.158	0.482	0.59	0.293
YML111W	BUL2	TFIID	TATA-less	2	-1.456	0.215	-0.077	0.439	0.386	-0.188
YIL109C	SEC24	TFIID	TATA-less	2	-1.724	0.123	0.087	0.52	0.404	-0.365
YNR068C	YNR068C	TFIID		2	-2.06	0.185	-0.801	0.804	0.883	0.134
YJL181W	YJL181W	TFIID	TATA-less	2	-1.454	-0.118	-0.571	0.667	0.583	-0.194
YDL084W	SUB2	TFIID	TATA-less	2	-1.584	0.339	0.439	0.595	0.291	-1.033
YPL149W	ATG5	TFIID	TATA-less	2	-2.248	-0.096	0.051	0.39	0.519	0.414
YKL074C	MUD2	TFIID		2	-1.81	0.527	-0.418	0.556	0.5	-0.152
YML108W	YML108W	TFIID	TATA-less	2	-2.322	0.1	0.042	0.364	0.652	0.841
YJR065C	ARP3	TFIID	TATA-less	2	-1.689	0.272	0.246	0.313	0.353	0.173
YBR236C	ABD1	TFIID	TATA-less	2	-1.453	-0.176	-0.538	0.337	0.324	-0.054
YDL002C	NHP10	TFIID	TATA-less	2	-1.97	0.023	0.274	0.284	0.188	-0.596
YLR436C	ECM30	TFIID	TATA-less	2	-1.32	0.22	0.044	0.892	0.56	-0.672
YLR212C	TUB4	TFIID		2	-1.56	-0.029	-0.629	0.863	0.739	-0.223
YLL013C	PUF3	TFIID	TATA-less	2	-1.536	0.278	0.061	0.489	0.427	-0.195
YOR140W	SFL1	TFIID	TATA-less	2	-1.459	0.024	-0.091	0.453	0.438	-0.049
YDL035C	GPR1	TFIID	TATA-containing	2	-1.597	0.419	-0.02	0.814	0.625	-0.381
YEL013W	VAC8	TFIID	TATA-less	2	-1.744	0.413	-0.01	0.784	0.952	0.28
YBL085W	BOI1	TFIID	TATA-less	2	-1.508	0.065	-0.302	0.394	0.329	-0.261
YLR009W	RLP24	TFIID	TATA-less	2	-1.923	0.094	0.12	0.394	0.299	-0.398
YMR189W	GCV2	TFIID	TATA-containing	2	-1.369	0.105	-0.027	0.382	0.344	-0.151
YGL245W	GUS1	TFIID	TATA-less	2	-1.813	0.145	-0.117	0.533	0.488	-0.125
YHL003C	LAG1	TFIID	TATA-less	2	-1.727	0.218	-0.153	0.412	0.384	-0.102
YDR179W-A	YDR179W-A	TFIID		2	-1.484	0.078	-0.523	0.226	0.26	0.199
YPL239W	YAR1	TFIID	TATA-less	2	-2.061	0.057	0.136	0.448	0.407	-0.141
YDR023W	SES1	TFIID	TATA-containing	2	-1.583	0.195	0.203	0.341	0.236	-0.528
YIL046W	MET30	TFIID	TATA-less	2	-1.933	-0.048	-0.172	0.417	0.537	0.364
YBL051C	PIN4	TFIID	TATA-less	2	-1.477	0.055	-0.141	0.605	0.608	0.006
YOL130W	ALR1	TFIID	TATA-less	2	-1.263	0.113	-0.181	0.673	0.405	-0.73
YMR076C	PDS5	TFIID	TATA-less	2	-1.264	0.032	-0.505	0.332	0.479	0.527
YOR260W	GCD1	TFIID	TATA-less	2	-1.707	0.028	0.058	0.412	0.308	-0.419
YDL145C	COP1	TFIID	TATA-less	2	-1.639	0.073	0.184	0.537	0.573	0.094
YHR142W	CHS7	TFIID	TATA-less	2	-1.075	0.354	0.084	0.378	0.535	0.503
YHR047C	AAP1	TFIID	TATA-less	2	-1.822	0.077	-0.217	0.776	0.835	0.105
YOR372C	NDD1	TFIID	TATA-less	2	-1.719	0.127	0.12	0.648	0.524	-0.307
YBL061C	SKT5	TFIID	TATA-less	2	-1.706	0.207	-0.03	0.334	0.472	0.5
YER154W	OXA1	TFIID	TATA-less	2	-1.447	0.028	0.204	0.26	0.211	-0.304
YOL051W	GAL11	TFIID	TATA-less	2	-1.473	-0.001	-0.188	0.912	1.236	0.438
YNL191W	DUG3	TFIID	TATA-containing	2	-1.838	0.225	-0.454	0.496	0.488	-0.022
YJL056C	ZAP1	TFIID		2	-1.238	-0.166	-0.811	0.75	0.554	-0.437
YGL105W	ARC1	TFIID	TATA-less	2	-1.825	0.055	0.145	0.435	0.429	-0.018
YGL039W	YGL039W	TFIID	TATA-less	2	-1.612	-0.123	0.141	0.571	0.239	-1.255
YBR289W	SNF5	TFIID	TATA-less	2	-1.728	0.259	-0.312	0.479	0.536	0.163
YMR319C	FET4	CR	TATA-containing	2	-1.338	0.188	-0.054	0.839	1.535	0.872
YIL125W	KGD1	TFIID	TATA-less	2	-1.34	0.036	0.084	0.953	0.705	-0.435
YML031W	NDC1	TFIID	TATA-less	2	-1.667	0.065	-0.265	0.571	0.414	-0.464
YLR430W	SEN1	TFIID	TATA-less	2	-1.445	0.098	-0.406	0.58	0.511	-0.182
YNL166C	BNI5	TFIID	TATA-less	2	-1.769	0.439	-0.145	0.475	0.579	0.287
YOR193W	PEX27	TFIID	TATA-containing	2	-1.492	0.075	-0.272	0.252	0.343	0.445
YCL011C	GBP2	TFIID	TATA-less	2	-1.843	0.229	0.166	1.029	0.502	-1.034
YDR454C	GUK1	TFIID	TATA-less	2	-1.617	-0.468	-0.313	0.598	0.363	-0.72
YJL053W	PEP8	TFIID	TATA-containing	2	-1.503	-0.014	-0.418	0.676	0.287	-1.236
YGL145W	TIP20	TFIID	TATA-containing	2	-1.524	0.033	-0.718	0.359	0.58	0.692
YNL006W	LST8	TFIID	TATA-less	2	-1.896	-0.351	-0.207	0.468	0.57	0.285
YDR427W	RPN9	TFIID	TATA-less	2	-1.794	0.264	0.221	0.384	0.267	-0.523
YLR175W	CBF5	TFIID	TATA-less	2	-1.602	0.146	0.211	0.528	0.545	0.047
YDR017C	KCS1	TFIID		2	-1.468	0.33	0.119	0.663	0.837	0.334
YNL229C	URE2	TFIID	TATA-less	2	-1.729	0.122	-0.062	0.603	0.393	-0.618
YGL073W	HSF1	TFIID	TATA-less	2	-0.979	0.236	0.326	0.335	0.247	-0.437
YIL144W	NDC80	TFIID	TATA-less	2	-1.638	0.112	-0.061	0.333	0.349	0.068
YMR161W	HLJ1	TFIID	TATA-less	2	-1.952	-0.079	-0.266	0.881	0.475	-0.891
YDL095W	PMT1	TFIID	TATA-less	2	-1.513	0.235	0.159	0.395	0.236	-0.742
YMR146C	TIF34	TFIID	TATA-less	2	-1.35	0.199	0.037	0.175	0.185	0.076
YMR091C	NPL6	TFIID		2	-1.633	0.251	0.238	0.524	0.453	-0.208
YBR087W	RFC5	TFIID	TATA-less	2	-1.438	0.37	0.03	0.574	0.462	-0.313
YIL138C	TPM2	TFIID	TATA-containing	2	-1.946	0.101	0.107	0.491	0.32	-0.621
YMR012W	CLU1	TFIID	TATA-less	2	-1.669	0.1	0.016	0.392	0.344	-0.19
YLR266C	PDR8	TFIID	TATA-less	2	-1.518	0.16	-0.248	0.355	0.557	0.647
YPL181W	CTI6	TFIID	TATA-less	2	-1.98	0.053	0.033	0.33	0.421	0.354
YPR070W	MED1	TFIID	TATA-less	2	-2.003	0.008	-0.334	0.503	0.5	-0.01
YML074C	FPR3	TFIID	TATA-less	2	-1.954	0.187	-0.06	0.378	0.27	-0.484
YNR029C	YNR029C	TFIID	TATA-containing	2	-1.555	-0.001	-0.482	0.298	0.247	-0.272
YDR202C	RAV2	TFIID		2	-1.954	0.204	-0.297	0.255	0.908	1.834
YOR270C	VPH1	TFIID	TATA-less	2	-1.436	0.136	0.179	0.478	0.314	-0.607
YOR127W	RGA1	TFIID	TATA-less	2	-1.714	0.113	-0.252	0.609	0.393	-0.632
YMR309C	NIP1	TFIID	TATA-less	2	-1.657	0.285	0.296	1.055	0.789	-0.418
YJL133W	MRS3	TFIID	TATA-less	2	-1.692	0.393	0.225	1.333	1	-0.414
YCR033W	SNT1	TFIID	TATA-less	2	-1.525	0.247	0.07	0.759	0.345	-1.139
YNL161W	CBK1	TFIID	TATA-less	2	-1.21	0.164	-0.027	0.439	0.258	-0.769
YGL197W	MDS3	TFIID	TATA-less	2	-1.505	0.29	-0.097	0.927	0.537	-0.786
YDR266C	HEL2	TFIID	TATA-less	2	-1.638	0.128	-0.097	0.549	0.378	-0.54
YDR152W	GIR2	TFIID	TATA-less	2	-1.944	0.295	0.422	0.274	0.241	-0.185
YLL051C	FRE6	TFIID	TATA-less	2	-1.611	0.1	-0.145	0.394	0.415	0.077
YMR290C	HAS1	TFIID	TATA-less	2	-1.512	0.025	-0.299	0.288	0.76	1.4
YHR205W	SCH9	TFIID	TATA-less	2	-1.726	0.403	0.196	0.68	0.669	-0.025
YPR040W	TIP41	TFIID	TATA-less	2	-1.918	0.422	-0.1	0.412	0.424	0.044
YBR159W	IFA38	TFIID	TATA-less	2	-1.597	-0.1	-0.009	0.974	1.233	0.341
YLR231C	BNA5	TFIID		2	-1.476	-0.193	-0.906	0.954	0.828	-0.205
YER021W	RPN3	TFIID	TATA-less	2	-1.7	0.158	0.403	0.726	0.947	0.384
YHR058C	MED6	TFIID	TATA-containing	2	-2.139	-0.109	-0.129	0.457	0.317	-0.525
YOR361C	PRT1	TFIID	TATA-less	2	-1.778	0.151	0.265	0.711	0.535	-0.41
YKL063C	YKL063C	TFIID	TATA-less	2	-1.952	0.409	0.281	0.38	0.365	-0.056
YJL148W	RPA34	TFIID	TATA-less	2	-1.741	0.393	-0.015	0.325	0.405	0.321
YDR452W	PPN1	TFIID	TATA-less	2	-1.489	0.194	-0.046	0.675	0.534	-0.338
YIL063C	YRB2	TFIID	TATA-containing	2	-1.608	-0.192	-0.367	0.794	0.599	-0.407
YJL005W	CYR1	TFIID	TATA-less	2	-1.661	0.156	-0.244	0.289	0.386	0.419
YPL160W	CDC60	TFIID	TATA-less	2	-1.634	0.338	0.199	0.426	0.373	-0.192
YHR098C	SFB3	TFIID	TATA-less	2	-1.615	0.03	-0.156	0.538	0.484	-0.154
YJR090C	GRR1	TFIID	TATA-less	2	-1.641	0.183	-0.191	0.441	0.34	-0.376
YML006C	GIS4	TFIID	TATA-less	2	-1.437	-0.081	-0.37	0.877	1.118	0.351
YMR210W	YMR210W	TFIID	TATA-less	2	-1.498	-0.181	-0.301	0.428	0.492	0.199
YOR098C	NUP1	TFIID	TATA-less	2	-1.567	0.088	-0.058	0.422	0.625	0.569
YOR080W	DIA2	TFIID		2	-0.694	-0.15	-0.049	0.358	0.361	0.012
YPR033C	HTS1	TFIID	TATA-less	2	-1.807	0.109	-0.215	0.959	0.925	-0.052
YDL019C	OSH2	TFIID	TATA-less	2	-1.592	0.147	-0.349	0.283	0.36	0.349
YPR042C	PUF2	TFIID	TATA-less	2	-1.665	0.16	-0.002	0.515	0.374	-0.461
YOR033C	EXO1	TFIID	TATA-less	2	-1.589	0.071	-0.349	0.784	0.756	-0.052
YOR195W	SLK19	TFIID	TATA-less	2	-1.545	0.29	-0.101	0.724	0.445	-0.702
YLL010C	PSR1	TFIID	TATA-less	2	-1.728	0.216	0.015	0.484	0.456	-0.083
YDL074C	BRE1	TFIID	TATA-less	2	-1.621	0.226	0.052	0.461	0.53	0.201
YBR133C	HSL7	TFIID	TATA-less	2	-1.587	0.092	-0.12	0.845	0.534	-0.663
YDL088C	ASM4	TFIID	TATA-less	2	-1.859	0.206	-0.046	0.706	0.502	-0.492
YHL010C	ETP1	TFIID		2	-1.984	0.301	-0.123	0.763	1.118	0.552
YNR050C	LYS9	TFIID	TATA-containing	2	-1.917	0.132	-0.856	0.853	0.876	0.038
YER174C	GRX4	TFIID	TATA-less	2	-1.128	-0.255	-0.109	0.922	1.189	0.367
YOR021C	SFM1	TFIID	TATA-less	2	-1.783	0.055	-0.623	0.506	0.406	-0.316
YOR147W	MDM32	TFIID	TATA-less	2	-1.726	0.174	-0.112	0.484	0.538	0.153
YLR347C	KAP95	TFIID	TATA-less	2	-1.706	0.16	0.178	0.439	0.328	-0.423
YNL077W	APJ1	TFIID	TATA-less	2	-1.786	0.029	0.105	1.372	4.19	1.611
YNL082W	PMS1	TFIID	TATA-less	2	-1.462	0.165	-0.43	0.233	0.206	-0.174
YHR086W	NAM8	TFIID	TATA-less	2	-1.459	0.165	-0.079	0.436	0.327	-0.415
YDR358W	GGA1	TFIID	TATA-containing	2	-1.608	0.236	-0.189	0.389	0.206	-0.919
YML038C	YMD8	TFIID	TATA-less	2	-1.444	0.108	0.072	0.776	0.336	-1.207
YKL020C	SPT23	TFIID	TATA-less	2	-1.555	0.192	0.019	0.507	0.276	-0.878
YJR003C	YJR003C	CR	TATA-less	2	-1.002	0.036	0.205	1.42	2.554	0.847
YPR105C	COG4	TFIID	TATA-less	2	-1.472	0.208	-0.394	0.451	0.831	0.882
YOR381W	FRE3	TFIID		2	-1.265	-0.181	-0.821	0.579	0.701	0.275
YOR359W	VTS1	TFIID	TATA-less	2	-1.805	0.202	0.026	0.807	0.437	-0.886
YEL006W	YEA6	TFIID	TATA-containing	2	-1.85	-0.09	-0.234	0.785	1.896	1.272
YER125W	RSP5	TFIID		2	-1.638	0.156	0.172	0.704	0.373	-0.917
YDR062W	LCB2	TFIID	TATA-less	2	-1.645	0.263	-0.026	0.569	0.547	-0.059
YNL238W	KEX2	TFIID	TATA-less	2	-1.863	0.088	-0.099	0.693	0.665	-0.059
YDR143C	SAN1	TFIID	TATA-less	2	-1.741	0.068	-0.325	0.809	0.61	-0.408
YHR206W	SKN7	TFIID	TATA-less	2	-1.558	0.165	-0.198	0.6	0.661	0.138
YEL043W	YEL043W	TFIID	TATA-less	2	-1.806	0.081	-0.302	0.626	1.139	0.863
YDR097C	MSH6	TFIID	TATA-less	2	-1.384	0.123	-0.428	0.686	0.671	-0.032
YBL036C	YBL036C	TFIID	TATA-less	2	-1.864	0.347	0.015	0.527	0.9	0.772
YHR165C	PRP8	TFIID	TATA-containing	2	-1.518	0.201	-0.231	0.702	0.698	-0.008
YKL068W	NUP100	TFIID	TATA-less	2	-1.638	0.154	-0.31	0.54	0.587	0.12
YKL057C	NUP120	TFIID	TATA-less	2	-1.662	0.244	0.014	0.669	1.322	0.982
YCR053W	THR4	TFIID	TATA-less	2	-1.973	0.218	0.182	0.717	0.395	-0.861
YMR092C	AIP1	TFIID	TATA-less	2	-1.69	0.085	0.025	0.546	0.496	-0.139
YMR077C	VPS20	TFIID	TATA-less	2	-1.818	0.037	-0.648	0.661	0.675	0.031
YDL190C	UFD2	TFIID	TATA-less	2	-1.486	0.142	0.147	0.238	0.14	-0.769
YGR106C	VOA1	TFIID	TATA-less	2	-1.801	-0.021	-0.118	0.41	0.693	0.755
YLR380W	CSR1	TFIID	TATA-less	2	-1.549	-0.141	-0.15	0.69	0.626	-0.141
YJR058C	APS2	TFIID	TATA-less	2	-1.917	0.166	0.52	0.582	0.813	0.481
YKL219W	COS9	TFIID	TATA-containing	2	-1.329	-0.604	-1.53	0.907	1.137	0.326
YMR064W	AEP1	TFIID	TATA-less	2	-1.682	0.166	-0.225	0.574	0.41	-0.484
YDR150W	NUM1	TFIID		2	-1.793	0.099	-0.08	0.533	0.351	-0.603
YJR054W	KCH1	TFIID	TATA-less	2	-1.588	-0.084	-0.469	1.041	0.8	-0.379
YDR208W	MSS4	TFIID	TATA-less	2	-1.638	0.09	0.137	0.45	0.445	-0.013
YMR109W	MYO5	TFIID	TATA-less	2	-1.683	0.249	0.236	0.337	0.315	-0.096
YDR299W	BFR2	TFIID	TATA-containing	2	-1.834	0.253	0.003	0.465	0.333	-0.481
YDR211W	GCD6	TFIID	TATA-containing	2	-1.356	0.082	-0.083	0.598	0.497	-0.269
YLR357W	RSC2	TFIID	TATA-less	2	-1.57	0.107	-0.158	0.384	0.402	0.065
YDR027C	VPS54	TFIID	TATA-less	2	-1.518	-0.006	-0.296	0.946	1.192	0.334
YLR401C	DUS3	TFIID	TATA-less	2	-1.538	0.127	-0.253	0.433	0.516	0.252
YMR093W	UTP15	TFIID	TATA-less	2	-1.721	0.158	0.016	0.551	0.336	-0.715
YNL025C	SSN8	TFIID	TATA-less	2	-1.386	0.326	-0.583	0.56	0.354	-0.662
YMR120C	ADE17	TFIID	TATA-containing	2	-1.429	-0.03	-0.512	0.907	1.278	0.494
YOR321W	PMT3	TFIID		2	-1.307	0.181	-0.709	0.546	0.594	0.121
YPL259C	APM1	TFIID	TATA-less	2	-1.626	0.141	0.243	0.459	0.352	-0.385
YOR168W	GLN4	TFIID	TATA-less	2	-1.799	0.352	0.138	0.483	0.48	-0.009
YPR148C	YPR148C	TFIID	TATA-less	2	-1.554	0.186	-0.411	0.531	0.687	0.373
YFL037W	TUB2	TFIID	TATA-less	2	-1.628	0.085	-0.081	0.66	0.519	-0.345
YOR262W	GPN2	TFIID	TATA-less	2	-1.636	0.313	-0.335	0.32	0.417	0.382
YKL172W	EBP2	TFIID	TATA-less	2	-1.741	0.234	-0.093	0.439	0.296	-0.571
YDR119W	VBA4	TFIID	TATA-less	2	-1.612	-0.074	-0.209	0.582	0.383	-0.604
YHR050W	SMF2	TFIID	TATA-less	2	-2.005	0.158	-0.346	0.534	0.539	0.014
YBR143C	SUP45	TFIID	TATA-less	2	-1.999	0.329	0.474	0.538	0.617	0.197
YPL153C	RAD53	TFIID	TATA-less	2	-1.442	0.016	-0.5	0.434	0.356	-0.286
YJL129C	TRK1	TFIID	TATA-less	2	-1.616	0.19	-0.182	0.42	0.341	-0.3
YOR335C	ALA1	TFIID	TATA-less	2	-1.796	0.178	0.103	0.431	0.274	-0.655
YJL080C	SCP160	TFIID	TATA-less	2	-1.878	0.151	0.097	0.534	0.684	0.356
YGL195W	GCN1	TFIID	TATA-less	2	-1.619	0.209	-0.105	0.398	0.35	-0.188
YMR124W	EPO1	TFIID	TATA-less	2	-1.5	-0.093	-0.456	0.729	0.574	-0.344
YJL084C	ALY2	TFIID	TATA-less	2	-1.205	0.052	-0.245	0.338	0.501	0.569
YGR056W	RSC1	TFIID	TATA-less	2	-1.778	0.268	0.033	0.285	0.55	0.947
YHL008C	YHL008C	TFIID	TATA-less	2	-1.791	0.157	-0.23	0.495	0.576	0.219
YBL079W	NUP170	TFIID	TATA-less	2	-1.644	0.093	-0.056	0.688	0.523	-0.395
YHR009C	TDA3	TFIID	TATA-less	2	-1.496	0.137	0.023	0.489	0.54	0.144
YGR094W	VAS1	TFIID	TATA-less	2	-1.953	0.147	0.088	0.557	0.525	-0.086
YMR065W	KAR5	TFIID	TATA-less	2	-1.854	0.253	-0.12	0.445	0.716	0.687
YPL169C	MEX67	TFIID	TATA-less	2	-1.702	0.102	-0.056	0.479	0.225	-1.09
YDR420W	HKR1	TFIID	TATA-less	2	-1.659	-0.108	-0.305	0.62	0.649	0.066
YLR173W	YLR173W	TFIID		2	-1.489	-0.078	-0.216	0.59	0.912	0.63
YOR290C	SNF2	TFIID	TATA-less	2	-1.513	0.19	-0.018	0.568	0.483	-0.234
YHR077C	NMD2	TFIID		2	-1.707	0.314	-0.152	0.432	0.3	-0.525
YKL024C	URA6	TFIID	TATA-less	2	-1.962	0.124	0.14	0.466	0.828	0.828
YBR150C	TBS1	TFIID	TATA-less	2	-1.206	0.125	-0.261	0.284	0.255	-0.153
YBL066C	SEF1	TFIID		2	-1.979	0.098	-0.455	0.766	0.882	0.203
YCL050C	APA1	TFIID	TATA-less	2	-2.144	0.236	-0.308	0.433	0.361	-0.264
YJL076W	NET1	TFIID	TATA-less	2	-1.532	0.207	-0.121	0.93	0.895	-0.055
YPR175W	DPB2	TFIID	TATA-less	2	-1.481	-0.041	-0.755	0.497	0.882	0.828
YBR059C	AKL1	TFIID	TATA-less	2	-1.694	0.212	-0.05	0.451	0.399	-0.177
YML043C	RRN11	TFIID	TATA-less	2	-1.577	0.148	-0.127	0.3	0.22	-0.448
YBR202W	MCM7	TFIID	TATA-less	2	-1.859	0.221	-0.219	0.662	0.434	-0.609
YGL078C	DBP3	TFIID	TATA-less	2	-2.13	0.064	-0.061	0.697	1.361	0.965
YHR064C	SSZ1	TFIID	TATA-less	2	-1.802	0.1	0.143	0.509	0.272	-0.904
YDR295C	HDA2	TFIID	TATA-less	2	-1.655	0.118	-0.609	0.907	0.43	-1.078
YOL089C	HAL9	TFIID	TATA-containing	2	-1.6	0.027	-0.454	0.579	0.756	0.386
YKR044W	UIP5	TFIID	TATA-containing	2	-1.934	-0.117	-0.071	0.456	0.77	0.756
YKR010C	TOF2	TFIID	TATA-less	2	-1.746	0.203	-0.142	0.41	0.318	-0.368
YPR154W	PIN3	TFIID	TATA-less	2	-2.437	0.148	-0.083	0.755	0.505	-0.579
YGL255W	ZRT1	CR	TATA-less	2	-1.991	0.072	-0.757	0.943	0.657	-0.521
YBL039C	URA7	TFIID	TATA-less	2	-1.749	0.239	-0.006	0.905	0.492	-0.88
YNL311C	SKP2	TFIID	TATA-less	2	-1.626	0.406	-0.526	0.786	0.393	-0.999
YBR283C	SSH1	TFIID	TATA-less	2	-1.763	0.087	0.074	0.641	0.829	0.371
YFL041W	FET5	TFIID	TATA-containing	2	-1.528	-0.027	-0.516	0.656	0.554	-0.244
YNL298W	CLA4	TFIID	TATA-less	2	-1.592	0.081	-0.145	0.578	0.783	0.438
YGR184C	UBR1	TFIID		2	-1.613	0.131	-0.359	1.003	1.065	0.087
YBL054W	TOD6	TFIID	TATA-less	2	-1.554	0.029	-0.626	0.874	0.851	-0.039
YLR246W	ERF2	TFIID		2	-1.68	-0.201	-0.641	1.015	1.157	0.188
YLR241W	CSC1	TFIID	TATA-less	2	-1.713	0.114	-0.312	0.568	0.543	-0.064
YPR010C	RPA135	TFIID	TATA-less	2	-1.479	0.052	-0.129	0.689	0.465	-0.566
YMR096W	SNZ1	TFIID		2	-1.551	-0.439	-1.127	0.805	0.545	-0.561
YDR101C	ARX1	TFIID	TATA-less	2	-1.825	0.1	-0.195	0.586	0.504	-0.217
YKL134C	2021-10-01	TFIID	TATA-less	2	-2.013	0.141	-0.287	0.537	0.569	0.084
YMR100W	MUB1	TFIID	TATA-less	2	-1.721	0.089	-0.042	0.618	0.391	-0.659
YNL254C	RTC4	TFIID	TATA-containing	2	-1.947	0.097	-0.37	0.411	0.842	1.036
YKL038W	RGT1	TFIID	TATA-less	2	-1.332	-0.061	-0.217	0.651	0.878	0.433
YER176W	ECM32	TFIID	TATA-less	2	-0.826	0.245	-0.212	0.279	0.229	-0.284
YER110C	KAP123	TFIID	TATA-less	2	-1.654	0.141	-0.176	0.53	0.553	0.06
YDR144C	MKC7	TFIID	TATA-less	2	-1.493	-0.075	-0.26	0.403	0.605	0.588
YOR299W	BUD7	TFIID	TATA-less	2	-1.499	-0.051	-0.347	0.309	0.349	0.175
YNL308C	KRI1	TFIID	TATA-less	2	-1.707	0.225	-0.273	0.449	0.32	-0.491
YMR300C	ADE4	TFIID	TATA-less	2	-1.827	0.127	-0.145	0.49	0.498	0.023
YKR087C	OMA1	TFIID	TATA-less	2	-1.907	-0.254	-0.191	0.668	0.848	0.343
YOL021C	DIS3	TFIID	TATA-less	2	-1.769	0.23	-0.236	0.545	0.538	-0.018
YGR090W	UTP22	TFIID	TATA-less	2	-1.72	0.119	-0.17	0.607	0.509	-0.255
YOL138C	RTC1	TFIID	TATA-containing	2	-1.813	-0.002	-0.624	0.432	0.909	1.073
YNL219C	ALG9	TFIID	TATA-less	2	-2.027	0.348	-0.082	0.644	0.485	-0.41
YPL126W	NAN1	TFIID	TATA-less	2	-1.461	-0.071	-0.196	0.782	1.018	0.38
YGR140W	CBF2	TFIID	TATA-less	2	-1.571	0.037	-0.459	0.396	0.498	0.33
YOL090W	MSH2	TFIID	TATA-less	2	-1.664	0.012	-0.485	0.4	0.435	0.122
YGR168C	YGR168C	TFIID	TATA-less	2	-1.995	0.16	-0.179	0.273	0.469	0.784
YLL031C	GPI13	TFIID	TATA-less	2	-1.626	-0.068	-0.543	0.575	0.478	-0.266
YGR187C	HGH1	TFIID	TATA-less	2	-1.886	0.28	-0.129	0.245	0.181	-0.436
YBR092C	PHO3	CR	TATA-containing	2	-2.235	0.304	0.145	0.612	0.618	0.014
YDR496C	PUF6	TFIID	TATA-less	2	-1.927	0.116	-0.102	0.529	1.198	1.18
YKL210W	UBA1	TFIID	TATA-less	2	-1.953	0.236	0.307	2.193	5.289	1.27
YAL029C	MYO4	TFIID	TATA-less	2	-1.78	0.144	-0.123	0.454	0.495	0.125
YKR088C	TVP38	TFIID		2	-1.223	-0.807	-0.123	1.89	2.248	0.25
YNL256W	FOL1	TFIID	TATA-less	2	-1.781	-0.032	-0.15	0.233	0.155	-0.584
YPL125W	KAP120	TFIID	TATA-less	2	-1.898	0.2	-0.375	0.918	1.215	0.404
YOR324C	FRT1	TFIID	TATA-less	2	-1.782	0.081	-0.391	0.768	0.944	0.299
YCR047C	BUD23	TFIID	TATA-less	2	-1.847	-0.207	-0.628	0.638	0.747	0.226
YCR054C	CTR86	TFIID	TATA-less	2	-1.859	0.236	-0.197	0.303	0.339	0.159
YLR336C	SGD1	TFIID	TATA-containing	2	-1.568	-0.002	-0.474	0.796	0.973	0.29
YPL012W	RRP12	TFIID	TATA-less	2	-1.534	0.06	-0.396	0.561	0.767	0.451
YBR263W	SHM1	TFIID		2	-2.216	0.194	-0.38	0.324	0.452	0.48
YBR156C	SLI15	TFIID	TATA-less	2	-1.309	0.223	-0.182	1.241	2.946	1.248
YLR420W	URA4	TFIID	TATA-containing	2	-1.992	-0.356	-0.401	0.3	0.312	0.061
YBR043C	QDR3	TFIID	TATA-less	2	-1.981	0.208	-0.326	0.26	0.424	0.708
YPL183C	RTT10	TFIID	TATA-less	2	-1.991	0.026	-0.443	0.448	0.393	-0.192
YDR078C	SHU2	TFIID	TATA-less	2	-1.044	0.027	0.705	0.168	0.075	-1.162
YBL004W	UTP20	TFIID	TATA-less	2	-1.489	0.129	0	0.133	0.066	-1.015
YMR261C	TPS3	TFIID	TATA-less	2	-1.956	0.093	-0.277	0.471	0.413	-0.189
YPR196W	YPR196W	TFIID		2	-1.376	0.128	-0.996	1.165	0.763	-0.611
YDR109C	YDR109C	TFIID		2	-2.207	0.063	-0.473	0.36	0.9	1.324
YFR042W	KEG1	TFIID	TATA-less	3	-1.783	-0.167	-1.008	0.475	0.639	0.428
YGR049W	SCM4	TFIID	TATA-containing	3	-1.164	-0.086	-0.457	1.104	0.522	-1.081
YKL161C	KDX1	TFIID		3	-1.733	0.066	-1.217	1.099	1.015	-0.116
YNL133C	FYV6	TFIID		3	-1.82	0.153	-0.392	0.404	0.607	0.585
YGL045W	RIM8	TFIID		3	-1.132	-0.128	-0.683	0.642	1.359	1.081
YNL212W	VID27	TFIID	TATA-less	3	-2.147	0.109	-0.463	0.421	0.555	0.4
YDL010W	GRX6	TFIID	TATA-less	3	-1.756	0.173	-0.32	0.426	0.451	0.084
YNR036C	MRPS12	TFIID	TATA-less	3	-2.43	0.566	0.155	0.988	0.619	-0.675
YBR213W	MET8	TFIID		3	-1.817	-0.036	-1.125	0.726	0.675	-0.105
YPR200C	ARR2	TFIID		3	-1.522	-0.122	-1.418	0.611	0.711	0.219
YOR327C	SNC2	TFIID	TATA-less	3	-1.68	0.177	0.6	0.362	0.247	-0.551
YOR157C	PUP1	TFIID	TATA-less	3	-1.87	0.352	0.51	0.3	0.262	-0.195
YLR193C	UPS1	TFIID	TATA-containing	3	-1.752	-0.474	-0.256	0.706	0.924	0.387
YIR031C	DAL7	TFIID	TATA-less	3	-1.733	-0.091	-0.534	0.623	0.467	-0.414
YKL159C	RCN1	TFIID	TATA-containing	3	-1.94	-0.287	-0.18	0.379	0.645	0.768
YLR104W	LCL2	TFIID	TATA-less	3	-2.217	0.029	-0.532	0.669	0.377	-0.826
YBR255C-A	YBR255C-A	TFIID	TATA-less	3	-2.348	0.076	-0.694	0.937	0.719	-0.383
YPR067W	ISA2	TFIID		3	-2.655	-0.098	-0.046	0.839	0.622	-0.431
YOR103C	OST2	TFIID	TATA-less	3	-2.508	0.69	0.624	0.298	0.463	0.633
YML129C	COX14	TFIID	TATA-less	3	-2.105	0.035	0.206	0.61	0.478	-0.353
YPL055C	LGE1	TFIID	TATA-less	3	-1.364	0.231	0.186	0.332	0.479	0.53
YEL020W-A	TIM9	TFIID	TATA-containing	3	-2.238	-0.239	-0.201	0.67	0.851	0.344
YGR074W	SMD1	TFIID	TATA-less	3	-2.654	0.292	-0.006	0.555	0.246	-1.176
YLR270W	DCS1	TFIID	TATA-containing	3	-1.71	0.27	-0.275	0.754	0.562	-0.424
YBR269C	SDH8	TFIID	TATA-less	3	-2.058	-0.069	-0.317	0.534	0.371	-0.527
YGR033C	TIM21	TFIID	TATA-less	3	-1.034	-0.032	0.234	0.381	0.501	0.396
YML064C	TEM1	TFIID	TATA-less	3	-1.863	0.002	-0.284	0.351	0.503	0.517
YDR059C	UBC5	TFIID	TATA-containing	3	-2.131	-0.365	-0.748	0.781	0.854	0.128
YJR085C	YJR085C	TFIID	TATA-less	3	-2.15	-0.108	-0.55	0.631	0.798	0.34
YPL094C	SEC62	TFIID	TATA-less	3	-1.919	0.138	0.237	0.423	0.407	-0.056
YAL014C	SYN8	TFIID	TATA-less	3	-2.435	0.372	0.074	0.465	0.34	-0.452
YPR168W	NUT2	TFIID	TATA-less	3	-2.689	0.041	-0.069	0.678	1.56	1.203
YGL127C	SOH1	TFIID	TATA-less	3	-1.777	0.061	-0.78	0.618	0.769	0.315
YER060W	FCY21	TFIID	TATA-containing	3	-2.173	-0.095	-0.467	0.907	0.855	-0.085
YPL064C	CWC27	TFIID		3	-2.204	0.27	-0.175	0.375	0.282	-0.409
YBL040C	ERD2	TFIID	TATA-less	3	-1.537	-0.128	0.153	0.333	0.249	-0.421
YCL005W-A	VMA9	TFIID		3	-0.953	0.012	0.537	0.246	0.09	-1.459
YHL039W	EFM1	TFIID	TATA-less	3	-1.643	0.05	-0.407	0.587	0.501	-0.229
YHR072W-A	NOP10	TFIID	TATA-less	3	-2.23	-0.046	-0.008	0.493	0.499	0.02
YNL131W	TOM22	TFIID	TATA-less	3	-1.994	0.27	0.213	0.456	0.204	-1.161
YER120W	SCS2	TFIID	TATA-less	3	-1.879	0.092	0.305	0.491	0.526	0.097
YPL059W	GRX5	TFIID	TATA-less	3	-2.337	0.134	0.007	0.425	0.781	0.878
YNL312W	RFA2	TFIID	TATA-less	3	-1.885	0.247	-0.265	0.371	0.355	-0.067
YGR038W	ORM1	TFIID	TATA-less	3	-1.938	0.095	-0.231	1.154	0.789	-0.549
YLR163C	MAS1	TFIID	TATA-less	3	-1.819	-0.086	0.054	0.338	0.266	-0.345
YKL128C	PMU1	TFIID	TATA-less	3	-1.677	0.058	0.296	0.441	0.539	0.289
YGL047W	ALG13	TFIID		3	-1.871	-0.178	-0.27	0.335	0.294	-0.188
YGR135W	PRE9	TFIID	TATA-less	3	-1.838	-0.08	0.081	0.418	0.487	0.22
YGL043W	DST1	TFIID	TATA-less	3	-1.635	0.122	-0.212	0.434	0.494	0.189
YKL069W	YKL069W	TFIID		3	-2.25	-0.089	0.161	0.273	0.423	0.631
YPR045C	THP3	CR	TATA-less	3	-1.793	0.13	0.445	0.46	0.263	-0.809
YNL177C	MRPL22	TFIID	TATA-less	3	-1.444	-0.017	0.513	0.237	0.266	0.168
YBR187W	GDT1	TFIID	TATA-less	3	-1.775	-0.019	0.003	0.37	0.314	-0.234
YHL034C	SBP1	TFIID	TATA-less	3	-1.733	0.062	0.203	0.323	0.488	0.592
YNL044W	YIP3	TFIID	TATA-containing	3	-2.085	0.218	0.302	0.993	0.768	-0.369
YHR059W	FYV4	TFIID		3	-2.625	0.503	-0.146	0.528	0.675	0.353
YOR150W	MRPL23	TFIID	TATA-less	3	-2.068	0.307	0.405	0.488	0.472	-0.045
YER112W	LSM4	TFIID	TATA-less	3	-2.047	0.332	0.033	0.332	0.393	0.243
YDL051W	LHP1	TFIID	TATA-less	3	-1.969	0.112	-0.17	0.688	0.366	-0.91
YJL140W	RPB4	TFIID	TATA-less	3	-2.269	0.142	0.116	0.535	0.281	-0.931
YBR056W	YBR056W	TFIID	TATA-less	3	-1.481	-0.007	-0.509	0.303	0.342	0.175
YLR356W	ATG33	TFIID	TATA-less	3	-2.058	0.261	-0.266	0.731	0.395	-0.888
YKR003W	OSH6	TFIID	TATA-less	3	-2.018	0.068	-0.278	0.459	0.349	-0.398
YBR003W	COQ1	TFIID	TATA-less	3	-1.954	0.234	0.044	0.532	0.451	-0.239
YOR131C	YOR131C	TFIID	TATA-less	3	-1.854	-0.079	-0.356	0.51	0.647	0.343
YER018C	SPC25	TFIID	TATA-less	3	-2.209	0.203	0.619	1.047	0.972	-0.106
YML041C	VPS71	TFIID	TATA-less	3	-1.872	0.154	-0.269	0.317	0.891	1.491
YNL249C	MPA43	TFIID	TATA-less	3	-2.306	0.035	-0.692	0.855	0.689	-0.312
YKR062W	TFA2	TFIID	TATA-less	3	-2.05	-0.138	-0.327	0.305	0.644	1.081
YLR152C	YLR152C	TFIID	TATA-less	3	-1.611	-0.229	-0.662	0.602	0.757	0.332
YDL005C	MED2	TFIID	TATA-less	3	-1.874	0.144	-0.235	0.422	0.479	0.183
YDL175C	AIR2	TFIID	TATA-less	3	-2.117	0.132	-0.021	0.561	0.775	0.465
YKL007W	CAP1	TFIID	TATA-less	3	-1.942	0.258	0.07	0.345	0.252	-0.454
YBL006C	LDB7	TFIID	TATA-less	3	-1.633	0.179	0.604	0.654	0.555	-0.237
YGL166W	CUP2	TFIID	TATA-less	3	-1.828	-0.32	-0.52	0.568	0.901	0.666
YIL041W	GVP36	TFIID	TATA-less	3	-1.98	-0.32	0	0.37	0.332	-0.156
YLR046C	YLR046C	TFIID		3	-1.199	0.037	-0.463	0.898	0.446	-1.009
YDL053C	PBP4	TFIID	TATA-containing	3	-1.932	0.021	-0.007	0.649	0.762	0.23
YPR187W	RPO26	TFIID	TATA-less	3	-2.2	0.239	0.306	0.287	0.396	0.465
YMR041C	ARA2	TFIID		3	-1.487	0.06	-0.434	0.879	0.734	-0.26
YDR404C	RPB7	TFIID	TATA-less	3	-1.93	0.209	0.261	0.482	0.313	-0.622
YOL071W	SDH5	TFIID	TATA-containing	3	-1.913	0.142	-0.091	0.617	0.938	0.604
YOR197W	MCA1	TFIID	TATA-less	3	-1.322	-0.156	-0.053	0.356	0.17	-1.063
YOR261C	RPN8	TFIID	TATA-less	3	-1.725	0.146	0.334	0.379	0.249	-0.606
YER079W	YER079W	TFIID	TATA-less	3	-1.57	-0.235	-0.385	0.636	0.375	-0.764
YOR286W	RDL2	TFIID	TATA-containing	3	-1.787	0.058	-0.09	0.871	1.386	0.671
YPL178W	CBC2	TFIID	TATA-less	3	-1.631	0.069	-0.009	0.54	0.264	-1.029
YLR345W	YLR345W	TFIID		3	-1.413	0.032	0.098	0.777	0.779	0.005
YPR133C	SPN1	TFIID	TATA-containing	3	-1.561	0.309	0.476	0.266	0.102	-1.387
YER087C-B	SBH1	TFIID	TATA-less	3	-2.159	0.272	-0.12	0.729	1.357	0.897
YGR284C	ERV29	TFIID		3	-1.711	0.085	0.036	0.622	0.987	0.667
YMR298W	LIP1	TFIID	TATA-less	3	-2.222	0.021	-0.38	0.913	1.106	0.278
YFR044C	DUG1	TFIID	TATA-less	3	-1.9	0.005	-0.196	0.461	0.542	0.234
YKL195W	MIA40	TFIID	TATA-less	3	-1.919	0.093	0.067	0.405	0.347	-0.222
YDL092W	SRP14	TFIID	TATA-less	3	-2.075	0.104	0.064	0.401	0.283	-0.505
YPR103W	PRE2	TFIID	TATA-less	3	-1.867	0.114	0.223	0.282	0.229	-0.301
YIL077C	YIL077C	TFIID	TATA-less	3	-1.935	0.092	-0.004	0.561	0.436	-0.363
YOR283W	YOR283W	TFIID	TATA-less	3	-1.856	0.111	-0.217	0.475	0.375	-0.343
YPR060C	ARO7	TFIID	TATA-less	3	-2.256	0.304	-0.208	0.397	0.466	0.231
YNL149C	PGA2	TFIID	TATA-less	3	-1.999	0.101	-0.134	0.568	0.375	-0.598
YHL031C	GOS1	TFIID	TATA-less	3	-2.187	0.026	-0.305	0.461	0.622	0.434
YCL063W	VAC17	TFIID	TATA-less	3	-1.564	0.242	-0.117	0.482	0.449	-0.101
YHR004C	NEM1	TFIID	TATA-less	3	-1.764	0.016	-0.13	0.792	1.412	0.835
YGR235C	MIC26	TFIID	TATA-less	3	-1.535	0.193	0.563	0.157	0.082	-0.943
YDL120W	YFH1	TFIID	TATA-less	3	-1.993	-0.352	-0.327	0.543	0.463	-0.229
YKL080W	VMA5	TFIID	TATA-less	3	-1.698	-0.067	0.154	0.553	0.649	0.231
YDR280W	RRP45	TFIID	TATA-less	3	-1.756	-0.213	0.005	0.514	0.32	-0.683
YPR131C	NAT3	TFIID	TATA-containing	3	-1.695	-0.146	-0.342	0.201	0.299	0.575
YPR101W	SNT309	TFIID	TATA-containing	3	-1.312	0.223	0.475	0.175	0.08	-1.139
YJR139C	HOM6	TFIID	TATA-less	3	-1.987	0.335	0.101	0.721	0.392	-0.879
YGR063C	SPT4	TFIID	TATA-less	3	-2.097	-0.075	0.097	0.769	1.154	0.586
YKR038C	KAE1	TFIID	TATA-less	3	-1.713	-0.094	-0.195	0.619	0.359	-0.785
YJL174W	KRE9	TFIID	TATA-less	3	-1.778	0.141	0.154	0.401	0.31	-0.37
YIL070C	MAM33	TFIID	TATA-less	3	-2.051	0.554	0.29	0.531	0.624	0.234
YKL113C	RAD27	TFIID	TATA-less	3	-1.736	0.408	0.04	0.456	0.564	0.307
YER050C	RSM18	TFIID	TATA-less	3	-2.135	0.043	0.02	0.553	0.425	-0.379
YGR172C	YIP1	TFIID	TATA-less	3	-2.014	0.046	-0.088	0.619	0.267	-1.211
YLR186W	EMG1	TFIID	TATA-less	3	-1.75	0.155	0.336	0.908	1.932	1.089
YOR241W	MET7	TFIID		3	-1.923	0.229	-0.011	0.874	1.329	0.604
YGL252C	RTG2	TFIID	TATA-less	3	-1.625	-0.09	0.131	0.356	0.398	0.162
YPR024W	YME1	TFIID	TATA-less	3	-1.979	0.14	0.134	0.386	0.459	0.25
YLR107W	REX3	TFIID		3	-1.723	0.13	-0.657	0.858	1.35	0.653
YPR125W	YLH47	TFIID	TATA-less	3	-1.754	0.112	-0.226	0.502	0.254	-0.985
YDR400W	URH1	TFIID	TATA-less	3	-1.021	-0.355	-0.682	1.725	1.604	-0.105
YOR296W	YOR296W	TFIID	TATA-containing	3	-1.646	0.117	-0.796	0.947	0.813	-0.221
YCR069W	CPR4	TFIID	TATA-less	3	-1.794	0.112	-0.197	0.542	0.553	0.029
YDL001W	RMD1	TFIID	TATA-less	3	-1.991	0.124	-0.18	0.339	1.009	1.575
YGR156W	PTI1	CR	TATA-less	3	-1.777	0.037	0.316	0.467	0.457	-0.031
YMR039C	SUB1	TFIID	TATA-less	3	-1.361	-0.053	0.035	0.488	0.399	-0.292
YMR200W	ROT1	TFIID	TATA-containing	3	-1.962	0.091	0.348	0.633	0.795	0.329
YDR357C	CNL1	TFIID	TATA-less	3	-2.21	-0.604	0.013	0.594	0.509	-0.221
YOR256C	TRE2	TFIID	TATA-less	3	-2.239	0.052	-0.651	0.449	0.465	0.049
YHR146W	CRP1	TFIID	TATA-less	3	-1.58	0.041	-0.288	3.018	1.848	-0.708
YNL290W	RFC3	TFIID	TATA-containing	3	-1.214	-0.195	-0.523	0.516	0.222	-1.219
YNL081C	SWS2	TFIID	TATA-less	3	-2.158	0.542	0.352	0.394	0.475	0.272
YLR025W	SNF7	TFIID	TATA-less	3	-1.73	0.224	0.118	0.396	0.228	-0.801
YDL188C	PPH22	TFIID	TATA-containing	3	-1.757	-0.004	-0.089	0.521	0.74	0.506
YJL055W	YJL055W	TFIID	TATA-containing	3	-1.872	0.124	-0.222	0.559	0.438	-0.352
YKL042W	SPC42	TFIID	TATA-less	3	-1.619	0.041	-0.33	0.459	0.605	0.399
YKR011C	YKR011C	TFIID	TATA-less	3	-1.912	0.442	0.16	0.633	0.354	-0.837
YDL027C	YDL027C	TFIID	TATA-less	3	-1.88	-0.062	-0.369	0.558	0.607	0.121
YBL107C	MIX23	TFIID	TATA-less	3	-2.026	-0.014	-0.131	0.625	0.975	0.642
YDR013W	PSF1	TFIID	TATA-less	3	-1.948	-0.053	0.026	1.22	1.613	0.403
YBL050W	SEC17	TFIID	TATA-less	3	-2.097	0.369	0.168	0.347	0.347	-0.002
YPL152W	RRD2	TFIID	TATA-less	3	-1.942	0.375	0.151	0.362	0.465	0.362
YNR034W	SOL1	TFIID	TATA-less	3	-1.981	0.332	-0.303	0.599	0.737	0.297
YHL002W	HSE1	TFIID	TATA-containing	3	-1.948	0.25	0.146	0.752	0.599	-0.328
YFR050C	PRE4	TFIID	TATA-less	3	-2.075	0.179	0.168	0.529	0.293	-0.851
YOR176W	HEM15	TFIID	TATA-less	3	-1.844	0.075	-0.278	0.525	0.377	-0.479
YOL137W	BSC6	TFIID		3	-1.543	0.034	-0.01	0.254	0.136	-0.9
YFR052W	RPN12	TFIID	TATA-less	3	-1.998	0.176	0.823	0.317	0.206	-0.619
YCR036W	RBK1	TFIID	TATA-less	3	-1.413	-0.044	0.283	0.212	0.172	-0.301
YLL001W	DNM1	TFIID	TATA-less	3	-1.932	0.247	-0.232	0.717	0.654	-0.133
YML025C	YML6	TFIID	TATA-less	3	-1.73	-0.122	-0.497	0.458	0.402	-0.187
YGL091C	NBP35	TFIID		3	-1.313	-0.347	0.748	0.746	3.566	2.257
[truncated: 2,616 more rows]

## Sheet: 5B
gene_id	gene_name	class	TATA	rank	Pol2_total	Pol2_S5P	Pol2_S2P	TR_DMSO	TR_IAA	TR_change
YER081W	SER3	CR	TATA-containing	1	0.916	0.048	-0.042	12.453	2.544	-2.291
YNL135C	FPR1	CR	TATA-less	1	-2.465	-0.232	1.604	0.623	0.763	0.292
YNL251C	NRD1	CR	TATA-containing	1	0.561	0.006	0.403	4.5	1.296	-1.796
YOL123W	HRP1	CR		1	-0.083	-0.031	0.471	2.854	0.711	-2.004
YJL052W	TDH1	CR	TATA-containing	1	0.451	0.204	0.112	1.71	0.476	-1.844
YJL088W	ARG3	CR	TATA-containing	1	-0.289	-0.201	-0.464	0.335	0.304	-0.139
YGR254W	ENO1	CR	TATA-containing	1	0.678	0.003	-0.03	1.696	0.665	-1.35
YJR009C	TDH2	CR	TATA-containing	1	0.869	0.059	-0.002	0.472	0.417	-0.177
YJL133C-A	YJL133C-A	CR	TATA-containing	1	-0.014	0.148	-0.602	0.638	0.659	0.047
YPL058C	PDR12	CR	TATA-less	1	-0.178	0.105	0.07	0.927	0.398	-1.218
YPL265W	DIP5	CR	TATA-containing	1	-0.438	0.118	0.089	1.662	0.88	-0.916
YCL040W	GLK1	CR	TATA-containing	1	0.399	0.222	0.172	0.997	1.067	0.098
YFR053C	HXK1	CR	TATA-containing	1	-0.554	0.036	-0.088	0.525	0.415	-0.337
YGL209W	MIG2	CR	TATA-containing	1	-0.071	-0.074	0.035	0.93	0.635	-0.55
YCR005C	CIT2	CR	TATA-containing	1	-0.385	0.042	-0.087	0.493	0.39	-0.338
YMR195W	ICY1	CR	TATA-containing	1	-0.735	-0.132	0.095	0.848	0.789	-0.103
YML100W	TSL1	CR	TATA-containing	1	-0.253	-0.101	-0.098	0.526	0.279	-0.916
YIL119C	RPI1	CR	TATA-containing	1	-0.979	0.119	0.314	0.553	0.372	-0.572
YDL070W	BDF2	CR	TATA-containing	1	-0.071	0.074	0.206	0.739	0.544	-0.44
YKL086W	SRX1	CR	TATA-containing	1	0.506	-0.47	-0.899	0.876	0.497	-0.817
YFL021W	GAT1	CR	TATA-containing	1	-0.198	-0.066	-0.082	1.014	0.519	-0.967
YEL007W	MIT1	CR	TATA-less	1	-0.428	0.131	0.129	0.376	0.284	-0.405
YJL078C	PRY3	CR	TATA-less	1	-0.465	-0.087	-0.083	1.258	0.608	-1.05
YHR094C	HXT1	CR	TATA-containing	1	-0.085	-0.007	-0.001	0.43	0.443	0.043
YPL014W	YPL014W	CR	TATA-containing	1	-0.496	0.036	-0.077	1.03	0.799	-0.367
YNR001C	CIT1	CR	TATA-containing	1	-0.486	0.141	0.105	0.531	0.491	-0.112
YLR304C	ACO1	CR	TATA-containing	1	0.297	0.075	-0.035	0.767	0.636	-0.27
YLR044C	PDC1	CR	TATA-containing	1	0.233	0.031	-0.035	0.507	0.472	-0.101
YPR036W-A	SPO24	CR	TATA-containing	1	-0.122	0.081	0.213	0.43	0.469	0.126
YKL043W	PHD1	CR	TATA-containing	1	-1.149	-0.021	0.078	0.713	0.759	0.088
YBL106C	SRO77	CR		1	-1.083	-0.097	0.042	0.67	0.717	0.097
YKL109W	HAP4	CR	TATA-containing	1	-0.793	0.091	0.111	1.482	1.147	-0.369
YMR136W	GAT2	CR	TATA-containing	1	-0.99	-0.122	0.046	0.397	0.277	-0.52
YOL058W	ARG1	CR	TATA-less	1	-0.962	-0.176	-0.156	0.782	1.109	0.505
YKL060C	FBA1	CR	TATA-containing	1	0.397	0.052	0.036	0.497	0.453	-0.135
YLR258W	GSY2	CR	TATA-containing	1	-1.21	0.014	-0.04	0.549	0.326	-0.754
YJL079C	PRY1	CR	TATA-less	1	-0.713	0.137	0.187	1.102	1.032	-0.094
YOL086C	ADH1	CR	TATA-containing	1	0.186	0.095	0.024	0.538	0.508	-0.082
YML091C	RPM2	CR	TATA-less	1	0.098	-0.078	-0.022	0.605	0.37	-0.708
YDR050C	TPI1	CR	TATA-less	1	0.379	0.077	0.164	0.507	0.549	0.114
YHR071W	PCL5	CR	TATA-containing	1	-0.283	0.195	0.116	0.91	0.449	-1.017
YKL152C	GPM1	CR	TATA-less	1	0.402	0.058	0.096	0.665	0.557	-0.254
YOR136W	IDH2	CR	TATA-containing	1	0.401	-0.087	-0.005	0.766	0.573	-0.419
YIL056W	VHR1	CR	TATA-containing	1	-0.589	0.099	0.151	1.353	0.552	-1.292
YPL075W	GCR1	CR	TATA-less	1	0.349	0.031	0.039	0.606	0.362	-0.746
YBL064C	PRX1	CR	TATA-containing	1	-0.641	0.007	-0.047	0.708	0.535	-0.406
YGR209C	TRX2	CR	TATA-containing	1	0.131	-0.028	-0.571	0.497	0.391	-0.345
YLR399C	BDF1	CR	TATA-less	1	-0.127	0.193	0.102	1.29	0.8	-0.69
YJR148W	BAT2	CR	TATA-less	1	-1.341	-0.105	0.279	0.768	0.719	-0.096
YLR286C	CTS1	CR	TATA-containing	1	-0.305	0.062	-0.088	0.583	0.461	-0.338
YBR066C	NRG2	CR	TATA-containing	1	-1.23	-0.067	-0.043	0.547	0.46	-0.248
YNL289W	PCL1	CR	TATA-containing	1	-0.134	-0.008	0.077	0.592	0.424	-0.484
YKR093W	PTR2	CR	TATA-containing	1	-0.137	0.062	0.054	0.814	0.693	-0.232
YGR052W	FMP48	CR		1	-0.9	-0.354	-0.298	1.359	0.797	-0.769
YBR157C	ICS2	CR	TATA-containing	1	-0.997	-0.076	0.07	0.957	0.582	-0.718
YCR012W	PGK1	CR	TATA-containing	1	0.275	0.06	0.099	0.656	0.638	-0.041
YOR227W	HER1	CR	TATA-less	1	0.022	0.038	0.073	4.788	2.612	-0.874
YPR035W	GLN1	CR	TATA-containing	1	-0.342	0.128	0.029	0.709	0.694	-0.031
YNL008C	ASI3	CR	TATA-containing	1	-1.317	0.005	-0.001	0.988	1.336	0.436
YDR345C	HXT3	CR	TATA-containing	1	-0.165	0.004	-0.08	0.624	0.35	-0.833
YER067W	RGI1	CR		1	-1.335	-0.001	-0.23	0.651	0.863	0.407
YPL156C	PRM4	CR	TATA-containing	1	-1.055	-0.063	-0.222	0.728	0.555	-0.392
YBR083W	TEC1	CR	TATA-containing	1	-0.895	0.15	0.063	0.45	0.295	-0.608
YER124C	DSE1	CR	TATA-containing	1	-0.312	0.045	0.037	1.398	0.887	-0.657
YDR353W	TRR1	CR	TATA-less	1	-0.502	0	0.119	0.629	0.59	-0.09
YNL180C	RHO5	CR	TATA-less	1	-1.245	0.159	0.023	0.983	1.147	0.223
YDL182W	LYS20	CR	TATA-containing	1	-1.443	-0.011	0.293	0.512	0.63	0.298
YHR008C	SOD2	CR	TATA-containing	1	-0.887	0.137	0.096	0.521	0.801	0.619
YBR158W	AMN1	CR	TATA-containing	1	-0.491	0.026	-0.026	0.678	0.542	-0.322
YAL038W	CDC19	CR	TATA-less	1	0.188	0.074	0.001	0.978	0.857	-0.19
YOR247W	SRL1	CR	TATA-less	1	-0.015	0.074	0.105	0.471	0.357	-0.401
YHR143W	DSE2	CR	TATA-containing	1	-0.394	0.116	0.054	0.816	0.829	0.024
YGR008C	STF2	CR		1	-1.306	-0.092	-0.442	0.358	0.466	0.379
YPL026C	SKS1	CR	TATA-less	1	-0.693	0.083	0.069	0.782	0.523	-0.58
YMR090W	YMR090W	CR		1	-2.178	0.374	0.118	0.614	0.366	-0.748
YPR002W	PDH1	CR		1	-1.509	0.102	0.273	0.413	0.14	-1.563
YGR192C	TDH3	CR	TATA-containing	1	0.169	0.014	0.011	0.457	0.441	-0.05
YGL028C	SCW11	CR	TATA-less	1	-0.438	0.061	-0.046	0.927	0.64	-0.535
YDR043C	NRG1	CR	TATA-containing	1	-0.691	0.04	0.324	0.499	0.334	-0.578
YHR092C	HXT4	CR		1	-1.505	-0.472	-0.231	0.288	0.777	1.434
YER028C	MIG3	CR	TATA-containing	1	-0.856	0.019	0.177	1.069	1.735	0.699
YNL327W	EGT2	CR	TATA-containing	1	-0.434	0.108	-0.169	0.615	0.451	-0.445
YCR018C	SRD1	CR		1	-0.81	0.122	0.392	0.35	0.311	-0.172
YMR011W	HXT2	CR	TATA-containing	1	-1.046	0.13	-0.033	0.662	0.493	-0.425
YOR273C	TPO4	CR	TATA-containing	1	-0.855	0.15	0.028	1.041	0.444	-1.23
YOL109W	ZEO1	CR	TATA-containing	1	-0.406	0.116	0.511	0.542	0.475	-0.189
YNL231C	PDR16	CR	TATA-containing	1	-0.568	0.137	0.173	0.426	0.309	-0.464
YHR174W	ENO2	CR	TATA-less	1	0.144	0.029	0.024	0.707	0.552	-0.358
YMR251W-A	HOR7	CR	TATA-containing	1	-0.837	0.123	-0.205	0.527	0.586	0.155
YLR452C	SST2	CR	TATA-less	1	-0.724	0.068	0.013	0.87	0.72	-0.273
YGR234W	YHB1	CR	TATA-containing	1	-0.905	0.11	0.079	0.732	0.515	-0.508
YKL085W	MDH1	CR	TATA-containing	1	-0.625	0.124	0.236	0.988	1.119	0.18
YBR068C	BAP2	CR	TATA-containing	1	-0.311	0.036	0.042	0.59	0.45	-0.39
YPL250C	ICY2	CR	TATA-containing	1	-0.737	0.167	0.031	0.54	0.344	-0.649
YCL064C	CHA1	CR	TATA-containing	1	-0.862	0.069	0.17	0.947	0.751	-0.333
YDR451C	YHP1	CR	TATA-containing	1	-0.803	0.024	0.022	0.475	0.548	0.207
YER064C	VHR2	CR	TATA-containing	1	-0.814	0.025	0.096	0.332	0.332	-0.002
YGR146C	ECL1	CR	TATA-less	1	-1.13	0.105	0.23	0.755	0.486	-0.633
YJR147W	HMS2	CR	TATA-less	1	-1.453	0.021	0.014	1.997	1.324	-0.593
YDL055C	PSA1	CR	TATA-containing	1	-0.392	0.172	0.136	0.838	0.696	-0.268
YIL121W	QDR2	CR	TATA-containing	1	-0.544	0.007	-0.047	0.551	0.414	-0.414
YNL241C	ZWF1	CR		1	-0.724	0.033	0.011	0.955	0.675	-0.5
YGR161C	RTS3	CR	TATA-containing	1	-1.316	0.122	-0.027	1.186	0.701	-0.759
YMR173W	DDR48	CR	TATA-less	1	-0.269	0.12	0.095	0.246	0.274	0.156
YOR375C	GDH1	CR	TATA-containing	1	-0.052	0.027	-0.035	0.575	0.412	-0.481
YOR315W	SFG1	CR	TATA-less	1	-0.769	0.057	0.128	0.53	0.485	-0.13
YPR065W	ROX1	CR	TATA-less	1	-0.564	0.049	-0.037	1.143	0.832	-0.457
YDL020C	RPN4	CR	TATA-containing	1	-0.653	0.017	0.098	0.722	0.544	-0.408
YML028W	TSA1	CR	TATA-containing	1	0.205	0.051	-0.037	0.706	0.548	-0.365
YNL104C	LEU4	CR	TATA-containing	1	-0.339	0.087	0.082	1.012	0.995	-0.023
YEL071W	DLD3	CR	TATA-containing	1	-0.873	0.108	0.18	0.98	0.844	-0.216
YBR008C	FLR1	CR	TATA-less	1	-2.56	0.06	-0.252	0.775	1.614	1.059
YKR066C	CCP1	CR	TATA-less	1	-1.636	0.205	0.206	0.636	1.138	0.84
YNL037C	IDH1	CR	TATA-containing	1	-0.076	0.199	0.057	1.065	1.091	0.035
YPR145W	ASN1	CR	TATA-less	1	-0.258	0.035	0.013	0.844	0.646	-0.386
YBR054W	YRO2	CR	TATA-containing	1	-1.805	-0.246	0.214	0.823	0.989	0.264
YIL053W	GPP1	CR	TATA-containing	1	-0.013	0.153	0.095	0.917	0.75	-0.29
YPL061W	ALD6	CR	TATA-containing	1	-0.922	0.065	0.013	0.476	0.446	-0.094
YJR104C	SOD1	CR	TATA-containing	1	-0.159	0.065	0.184	0.398	0.357	-0.154
YPL256C	CLN2	CR	TATA-containing	1	-0.446	0.091	-0.024	0.638	0.514	-0.311
YER159C	BUR6	CR	TATA-less	1	-0.664	0.157	-0.023	0.221	0.264	0.256
YDR055W	PST1	CR	TATA-containing	1	-1.04	0.024	-0.108	0.577	0.569	-0.02
YAL040C	CLN3	CR	TATA-less	1	-1.179	0.118	0.193	1.171	0.622	-0.913
YNR067C	DSE4	CR	TATA-containing	1	-0.857	0.007	-0.037	0.408	0.337	-0.276
YOR303W	CPA1	CR		1	-0.493	0.22	0.108	1.029	0.32	-1.683
YPL158C	AIM44	CR	TATA-containing	1	-1.044	0.088	0.124	0.576	0.471	-0.289
YOR374W	ALD4	CR	TATA-containing	1	-1.125	0.122	0.367	0.223	0.276	0.304
YDR077W	SED1	CR	TATA-containing	1	-1.135	0.178	-0.223	0.582	0.406	-0.52
YOR161C	PNS1	CR		1	-0.902	-0.159	0.043	1.094	0.336	-1.703
YMR102C	YMR102C	CR		1	-0.978	0.058	0.196	1.284	1.122	-0.195
YKL051W	SFK1	CR	TATA-less	1	-2.387	-0.002	0.231	1.45	2.456	0.761
YKR076W	ECM4	CR		1	-1.382	0.009	0.243	0.271	0.659	1.283
YOR344C	TYE7	CR	TATA-containing	1	-1.147	0.151	0.409	1.826	1.277	-0.515
YBL002W	HTB2	CR	TATA-containing	1	-0.375	0.133	0.228	0.619	0.625	0.013
YKL164C	PIR1	CR	TATA-containing	1	-0.726	-0.075	0.037	0.51	0.512	0.005
YCL026C-B	HBN1	CR		1	-1.21	0.007	-0.219	0.366	0.066	-2.478
YMR145C	NDE1	CR	TATA-containing	1	-0.682	0.024	0.068	0.791	0.633	-0.32
YDR528W	HLR1	CR	TATA-containing	1	-0.645	-0.031	0.051	0.511	0.413	-0.306
YDL124W	YDL124W	CR	TATA-containing	1	-0.85	0.12	0.22	0.447	0.287	-0.639
YLR110C	CCW12	CR	TATA-containing	1	-0.19	0.132	0.375	0.485	0.514	0.083
YGL055W	OLE1	CR	TATA-containing	1	-0.529	0.115	0.103	1.978	0.857	-1.207
YOL151W	GRE2	CR	TATA-containing	1	-0.166	0.023	0.037	0.877	0.456	-0.943
YDL227C	HO	CR	TATA-less	1	-0.638	-0.007	-0.025	0.495	0.416	-0.252
YOR062C	YOR062C	CR		1	-0.996	0.123	-0.068	0.512	0.766	0.582
YML131W	YML131W	CR	TATA-containing	1	-1.176	-0.118	-0.062	0.395	0.671	0.765
YNL134C	YNL134C	CR	TATA-less	1	-0.746	-0.156	0.127	0.355	0.566	0.676
YPL004C	LSP1	CR	TATA-containing	1	-0.733	0.053	0.053	0.652	0.474	-0.46
YBR196C	PGI1	CR	TATA-containing	1	-0.007	0.09	0.079	1.287	1.009	-0.351
YJL157C	FAR1	CR		1	-0.733	-0.054	-0.045	1.378	0.856	-0.686
YPR138C	MEP3	CR	TATA-containing	1	-0.302	-0.118	0.036	0.703	0.563	-0.322
YER069W	ARG5,6	CR	TATA-less	1	-1.463	0.01	0.215	0.333	0.457	0.458
YHR018C	ARG4	CR	TATA-containing	1	-0.376	0.106	-0.005	0.776	0.559	-0.472
YIR017C	MET28	CR	TATA-less	1	-1.953	0.32	0.395	0.68	1.191	0.809
YKL185W	ASH1	CR	TATA-containing	1	-1.138	0.171	0.156	0.26	0.286	0.139
YNL300W	TOS6	CR	TATA-containing	1	-0.302	0.198	0.239	0.475	0.431	-0.138
YMR105C	PGM2	CR		1	-1.199	-0.1	-0.379	0.987	0.297	-1.731
YGL062W	PYC1	CR		1	-0.946	0.024	-0.011	0.665	0.253	-1.396
YDR380W	ARO10	CR		1	-1.559	-0.155	-0.099	0.569	0.576	0.017
YER053C	PIC2	CR	TATA-less	1	-1.374	-0.42	-0.114	0.623	0.227	-1.454
YGR086C	PIL1	CR	TATA-containing	1	-0.6	0.003	0.05	0.713	0.52	-0.454
YCL025C	AGP1	CR	TATA-containing	1	-0.302	-0.006	-0.068	0.932	0.577	-0.692
YDR033W	MRH1	CR	TATA-containing	1	-0.418	0.053	0.048	0.543	0.32	-0.762
YGL253W	HXK2	CR	TATA-containing	1	-0.64	0	0.073	0.665	0.678	0.027
YDR524C-B	YDR524C-B	CR	TATA-containing	1	-0.32	0.12	0.368	0.732	0.697	-0.07
YBL030C	PET9	CR	TATA-containing	1	-0.162	0.099	0.019	0.621	0.595	-0.062
YHR137W	ARO9	CR	TATA-containing	1	-0.875	0.234	0.101	0.938	1.02	0.122
YML027W	YOX1	CR	TATA-containing	1	-0.657	-0.048	-0.059	0.211	0.216	0.036
YOR264W	DSE3	CR	TATA-less	1	-0.954	0.037	-0.042	0.173	0.15	-0.211
YLR109W	AHP1	CR	TATA-containing	1	-0.204	0.048	0.095	0.383	0.391	0.029
YDR533C	HSP31	CR	TATA-containing	1	-1.736	0.087	0.131	0.548	0.483	-0.183
YEL046C	GLY1	CR	TATA-containing	1	-0.623	0.036	-0.02	0.668	0.496	-0.43
YPR149W	NCE102	CR	TATA-containing	1	-0.853	0.176	0.404	0.611	0.468	-0.384
YDR381W	YRA1	CR	TATA-containing	1	-0.307	0.124	0.111	0.873	0.553	-0.658
YMR006C	PLB2	CR		1	-0.639	0.084	0.049	1.135	0.497	-1.19
YJR048W	CYC1	CR	TATA-containing	1	-1.236	0.181	0.049	0.803	0.521	-0.624
YLR108C	YLR108C	CR	TATA-less	1	-0.157	-0.011	0.035	0.615	0.63	0.035
YDL022W	GPD1	CR	TATA-containing	1	-0.718	0.199	0.106	0.669	0.535	-0.322
YOL011W	PLB3	CR	TATA-containing	1	-0.556	0.038	0.11	1.409	0.637	-1.146
YGL117W	YGL117W	CR	TATA-containing	1	-1.933	0.365	0.46	0.718	0.409	-0.813
YMR058W	FET3	CR	TATA-containing	1	-0.986	0.044	0.043	0.692	0.484	-0.515
YDR046C	BAP3	CR	TATA-less	1	-0.748	0.071	-0.01	0.724	0.521	-0.473
YJL159W	HSP150	CR	TATA-containing	1	-0.791	0.061	-0.076	0.386	0.304	-0.344
YKR077W	MSA2	CR	TATA-less	1	-0.728	-0.149	-0.31	0.798	0.57	-0.485
YEL040W	UTR2	CR	TATA-containing	1	-0.622	0.179	0.166	0.555	0.519	-0.095
YPL082C	MOT1	CR	TATA-containing	1	-0.567	-0.012	-0.062	0.663	0.476	-0.478
YLR355C	ILV5	CR	TATA-containing	1	-0.345	0.131	0.083	0.837	0.635	-0.398
YDR135C	YCF1	CR	TATA-containing	1	-1.204	0.038	0.189	0.698	0.952	0.447
YKL096W-A	CWP2	CR	TATA-containing	1	-0.797	0.111	0.228	0.802	0.698	-0.201
YPL177C	CUP9	CR	TATA-less	1	-0.926	-0.08	-0.076	0.932	0.759	-0.297
YPL135W	ISU1	CR	TATA-containing	1	-0.716	-0.043	0.147	0.533	0.417	-0.355
YJL151C	SNA3	CR	TATA-containing	1	-1.04	-0.081	0.117	0.472	0.418	-0.178
YDL066W	IDP1	CR	TATA-less	1	-1.436	0.129	0.217	0.656	0.568	-0.207
YGR157W	CHO2	CR	TATA-less	1	-0.672	0.037	0.144	0.401	0.27	-0.571
YMR194C-B	CMC4	CR		1	-0.077	0.01	0.004	0.199	0.274	0.465
YIL051C	MMF1	CR	TATA-containing	1	-0.758	0.155	0.416	0.472	0.333	-0.501
YER073W	ALD5	CR	TATA-containing	1	-0.806	0.044	0.16	0.174	0.117	-0.574
YER062C	GPP2	CR	TATA-containing	1	-0.636	-0.476	-0.542	0.957	0.744	-0.364
YHR179W	OYE2	CR	TATA-containing	1	-2.329	-0.061	-0.038	0.479	0.419	-0.193
YLR413W	INA1	CR	TATA-containing	1	-0.647	0.067	0.051	0.713	0.642	-0.151
YMR122W-A	YMR122W-A	CR	TATA-containing	1	-0.646	-0.161	-0.126	0.705	0.62	-0.185
YNL036W	NCE103	CR	TATA-containing	1	-1.391	0.067	0.279	1.138	0.667	-0.77
YNL066W	SUN4	CR		1	-0.753	0.043	0.039	0.569	0.465	-0.291
YDR513W	GRX2	CR	TATA-containing	1	-1.167	-0.264	-0.205	0.371	0.482	0.376
YPL111W	CAR1	CR	TATA-containing	1	-0.662	-0.042	-0.144	0.731	0.77	0.075
YLR460C	YLR460C	CR		1	-1.706	-0.478	-0.042	0.56	0.303	-0.884
YGR055W	MUP1	CR	TATA-containing	1	-0.403	0.003	0.09	0.75	0.541	-0.472
YLR300W	EXG1	CR	TATA-containing	1	-0.663	0.075	0.043	0.699	0.612	-0.193
YNL030W	HHF2	CR	TATA-containing	1	-0.584	0.119	0.372	0.625	0.573	-0.125
YBR230C	OM14	CR	TATA-containing	1	-1.982	0.235	1.05	0.497	0.302	-0.72
YNR019W	ARE2	CR	TATA-less	1	-1.029	0.149	0.015	1.056	0.969	-0.124
YLR297W	YLR297W	CR	TATA-containing	1	-1.802	0.202	0.532	0.586	0.419	-0.485
YBR007C	DSF2	CR	TATA-less	1	-2.53	0.063	-0.156	0.941	0.639	-0.558
YKR042W	UTH1	CR	TATA-containing	1	-0.818	0.118	0.041	0.659	0.465	-0.503
YMR246W	FAA4	CR	TATA-containing	1	-0.847	0.073	-0.012	0.385	0.4	0.056
YJR103W	URA8	CR	TATA-containing	1	-0.695	-0.043	0.515	0.643	0.256	-1.326
YOR065W	CYT1	CR	TATA-containing	1	-0.941	-0.08	0.002	0.979	0.601	-0.704
YMR305C	SCW10	CR	TATA-less	1	-0.795	0.071	0.091	0.692	0.685	-0.014
YJL158C	CIS3	CR	TATA-containing	1	-0.754	0.123	0.288	0.547	0.42	-0.382
YBR071W	YBR071W	CR	TATA-less	1	-1.071	0.146	0.137	0.586	0.687	0.231
YJR004C	SAG1	CR		1	-1.598	0.028	-0.016	0.301	0.143	-1.076
YGL037C	PNC1	CR	TATA-containing	1	-0.839	0.039	-0.021	0.265	0.147	-0.847
YMR205C	PFK2	CR	TATA-containing	1	-0.169	0.036	-0.033	1.054	1.033	-0.03
YHL040C	ARN1	CR	TATA-less	1	-1.599	-0.018	0.182	1.172	0.776	-0.595
YOR230W	WTM1	CR	TATA-less	1	-1.513	0.108	0.209	0.685	0.507	-0.433
YGR041W	BUD9	CR	TATA-containing	1	-1.137	0.081	-0.076	0.656	0.456	-0.526
YCL030C	HIS4	CR	TATA-containing	1	-1.36	-0.418	-0.248	0.555	0.78	0.49
YER070W	RNR1	CR	TATA-containing	1	-0.169	0.069	-0.034	0.974	0.93	-0.066
YBR244W	GPX2	CR	TATA-containing	1	-0.614	0.134	0.181	0.465	0.898	0.948
YBL003C	HTA2	CR	TATA-containing	1	-0.371	0.186	0.41	0.823	0.574	-0.52
YGL008C	PMA1	CR	TATA-containing	1	-0.587	0.06	-0.06	0.254	0.207	-0.3
YKR013W	PRY2	CR	TATA-containing	1	-0.65	-0.086	-0.025	0.78	0.472	-0.724
YLR179C	YLR179C	CR	TATA-containing	1	-1.111	0.08	0.516	0.83	0.664	-0.324
YNL058C	YNL058C	CR	TATA-less	1	-1.218	-0.062	0.097	0.514	0.36	-0.516
YDR508C	GNP1	CR	TATA-containing	1	-0.861	0.124	0.11	1.281	0.94	-0.447
YJR109C	CPA2	CR	TATA-less	1	-0.429	0.023	0.06	0.518	0.664	0.359
YPL163C	SVS1	CR	TATA-less	1	-0.394	-0.075	-0.36	0.592	0.372	-0.671
YBR126C	TPS1	CR	TATA-containing	1	-1.224	0.175	0.215	1.332	0.597	-1.158
YKL182W	FAS1	CR		1	-0.439	0.049	-0.032	0.375	0.229	-0.713
YMR199W	CLN1	CR	TATA-containing	1	-0.962	0.189	0.153	0.51	0.47	-0.117
YLL041C	SDH2	CR	TATA-containing	1	-0.662	-0.126	-0.192	0.456	0.63	0.465
YOL116W	MSN1	CR	TATA-less	1	-1.964	0.213	0.505	0.571	1.525	1.418
YOL122C	SMF1	CR		1	-1.086	0.071	0.557	1.007	0.196	-2.364
YOR382W	FIT2	CR	TATA-less	1	-1.606	0.148	0.525	1.097	0.786	-0.48
YGR014W	MSB2	CR	TATA-containing	1	-0.58	0.061	0.002	0.556	0.39	-0.512
YDL003W	MCD1	CR	TATA-containing	1	-0.243	-0.018	-0.018	0.457	0.462	0.014
YMR307W	GAS1	CR	TATA-less	1	-0.671	0.028	0.002	0.754	0.796	0.078
YKL150W	MCR1	CR	TATA-containing	1	-1.376	0.373	0.26	0.592	0.558	-0.087
YOR226C	ISU2	CR	TATA-less	1	-0.488	0.138	0.425	0.615	0.471	-0.384
YDR001C	NTH1	CR	TATA-containing	1	-1.424	0.18	0.143	0.449	0.985	1.133
YEL060C	PRB1	CR	TATA-containing	1	-1.017	0.108	0.045	0.487	0.771	0.662
YML087C	AIM33	CR	TATA-less	1	-2.56	-0.173	0.15	2.937	1.533	-0.938
YJL101C	GSH1	CR	TATA-less	1	-0.635	0.211	0.105	0.787	0.538	-0.548
YNL208W	YNL208W	CR	TATA-less	1	-1.048	0.154	0.358	0.436	0.331	-0.396
YPL092W	SSU1	CR	TATA-less	1	-2.015	0.144	0.226	1.832	0.548	-1.742
YAL012W	CYS3	CR	TATA-less	1	-1.196	0.227	0.17	0.524	0.503	-0.058
YBR078W	ECM33	CR	TATA-less	1	-0.52	0.049	0.061	0.662	0.497	-0.414
YLR042C	YLR042C	CR		1	-2.76	0.202	0.603	0.941	1.06	0.172
YOR026W	BUB3	CR	TATA-less	1	-1.385	-0.286	0.544	1.602	1.632	0.026
YMR291W	TDA1	CR	TATA-less	1	-1.13	0.004	-0.059	0.642	0.709	0.143
YCR021C	HSP30	CR	TATA-containing	1	-2.137	0.121	-0.388	0.675	0.154	-2.133
YLL028W	TPO1	CR	TATA-containing	1	-0.894	0.151	0.162	1.153	0.872	-0.404
YLR417W	VPS36	TFIID	TATA-less	1	-1.055	0.209	0.192	0.375	0.98	1.385
YKL103C	APE1	CR		1	-1.406	0.204	0.029	1.378	0.744	-0.889
YOL119C	MCH4	CR	TATA-less	1	-1.552	0.107	-0.068	0.899	0.675	-0.413
YLR327C	TMA10	CR		1	-1.784	0.245	0.334	0.594	0.587	-0.018
YGR108W	CLB1	CR	TATA-containing	1	-0.861	0.059	0.144	0.96	0.77	-0.319
YKL035W	UGP1	CR	TATA-containing	1	-1.132	0.058	0.2	0.883	0.571	-0.629
YLL012W	YEH1	CR		1	-0.829	-0.024	0.356	0.499	0.62	0.313
YDL179W	PCL9	CR	TATA-less	1	-1.36	-0.074	0.078	0.633	0.483	-0.391
YDR275W	BSC2	CR		1	-0.748	0.237	0.126	0.385	0.471	0.292
YGR295C	COS6	CR	TATA-containing	1	-1.518	-0.048	0.363	2.061	0.494	-2.06
YFR033C	QCR6	CR	TATA-less	1	-0.741	0.194	-0.023	0.849	0.657	-0.372
YBR009C	HHF1	CR	TATA-containing	1	-0.765	-0.013	0.222	0.47	0.482	0.035
YGR155W	CYS4	CR	TATA-containing	1	-0.978	-0.047	0.082	0.74	0.562	-0.398
YER145C	FTR1	CR	TATA-containing	1	-1.761	0.061	0.017	0.787	0.608	-0.371
YIL155C	GUT2	CR	TATA-less	1	-1.387	0.014	0.016	3.198	1.084	-1.561
YKR052C	MRS4	CR	TATA-containing	1	-1.115	-0.347	-0.09	0.87	0.792	-0.136
YHR162W	MPC2	CR	TATA-less	1	-1.218	-0.045	0.421	0.553	0.417	-0.407
YDR309C	GIC2	CR	TATA-containing	1	-0.938	0.083	0.132	1.306	1.007	-0.375
YNL031C	HHT2	CR	TATA-containing	1	-0.523	-0.03	0.097	0.682	0.637	-0.098
YCR102C	YCR102C	CR		1	-1.704	-0.177	-0.427	1.032	0.52	-0.99
YER056C	FCY2	CR	TATA-containing	1	-0.863	-0.049	-0.044	0.46	0.4	-0.203
YBR145W	ADH5	CR	TATA-containing	1	-1.529	-0.28	0.444	0.901	0.457	-0.98
YDR011W	SNQ2	CR	TATA-containing	1	-0.867	0.054	0.048	0.498	0.541	0.12
YLR346C	YLR346C	CR	TATA-containing	1	-1.371	-0.172	0.397	0.275	0.371	0.431
YCL026C-A	FRM2	CR		1	-1.696	-0.168	-0.364	2.278	1.309	-0.799
YDR397C	NCB2	CR	TATA-containing	1	-1.356	0.237	0.053	0.35	0.354	0.016
YNL299W	TRF5	CR	TATA-less	1	-0.167	-0.047	0.294	1.042	1.177	0.176
YGR109C	CLB6	CR	TATA-containing	1	-0.758	-0.096	0.106	0.321	0.241	-0.413
YHL036W	MUP3	CR	TATA-less	1	-1.095	-0.124	-0.029	0.602	0.578	-0.058
YJL194W	CDC6	CR	TATA-less	1	-1.016	0.091	0.12	0.823	0.564	-0.545
YKR061W	KTR2	CR	TATA-containing	1	-1.458	-0.005	0.325	0.148	0.113	-0.384
YCL027W	FUS1	CR	TATA-less	1	-1.15	0.03	0.123	0.576	0.558	-0.045
YNL078W	NIS1	CR	TATA-less	1	-1.283	0.091	0.088	0.898	0.473	-0.925
YEL034W	HYP2	CR	TATA-containing	1	-0.533	0.133	0.37	0.71	0.604	-0.232
YEL009C	GCN4	CR		1	-0.59	0.126	0.167	0.806	0.54	-0.578
YGR189C	CRH1	CR	TATA-containing	1	-0.799	0.058	-0.002	0.529	0.316	-0.743
YGL114W	YGL114W	CR	TATA-less	1	-2.151	0.036	0.123	0.948	0.773	-0.293
YOR107W	RGS2	CR	TATA-containing	1	0.106	-0.07	0.355	0.112	0.142	0.337
YMR037C	MSN2	CR		1	-1.975	0.239	0.181	1.007	0.778	-0.371
YLR225C	YLR225C	CR	TATA-containing	1	-1.041	0.032	0.195	0.277	0.32	0.208
YMR250W	GAD1	CR	TATA-less	1	-1.365	-0.443	-0.367	1.985	2.248	0.179
YBR132C	AGP2	CR	TATA-containing	1	-0.772	-0.233	-0.236	1.752	1.816	0.051
YPL274W	SAM3	CR	TATA-containing	1	-0.881	-0.084	0.076	0.331	0.466	0.492
YCL055W	KAR4	CR	TATA-containing	1	-1.34	-0.274	-0.096	0.483	0.305	-0.665
YOR052C	TMC1	CR	TATA-containing	1	-1.16	-0.035	0.301	0.588	0.521	-0.177
YKL120W	OAC1	CR	TATA-containing	1	-0.925	0.037	0.053	0.589	0.466	-0.337
YDR173C	ARG82	CR	TATA-less	1	-2.087	-0.015	0.165	1.615	0.739	-1.128
YPR106W	ISR1	CR	TATA-less	1	-1.281	0.101	0.012	0.376	0.531	0.499
YDR178W	SDH4	TFIID	TATA-containing	1	-1.337	0.382	-0.057	0.603	0.61	0.018
YNL055C	POR1	CR	TATA-less	1	-0.65	0.004	0.048	0.636	0.656	0.043
YMR038C	CCS1	CR	TATA-less	1	-1.27	-0.228	-0.094	0.536	0.356	-0.589
YPL231W	FAS2	CR	TATA-containing	1	-0.533	0.056	-0.005	0.731	0.396	-0.884
YDR032C	PST2	CR	TATA-containing	1	-2.323	-0.025	-0.387	0.636	0.851	0.42
YGL116W	CDC20	CR	TATA-less	1	-1.362	-0.093	-0.124	0.467	0.533	0.191
YER130C	COM2	CR	TATA-containing	1	-1.405	-0.036	0.045	1.057	0.876	-0.271
YER091C	MET6	CR	TATA-containing	1	-0.763	-0.022	-0.047	0.71	0.625	-0.185
YLR075W	RPL10	CR	TATA-containing	1	-1.668	0.065	0.285	0.555	0.469	-0.243
YDR074W	TPS2	CR	TATA-less	1	-1.523	0.054	-0.099	0.709	0.508	-0.481
YBR067C	TIP1	TFIID	TATA-containing	1	-1.382	0.19	0.016	0.702	0.591	-0.248
YDR155C	CPR1	CR	TATA-containing	1	-0.973	-0.054	0.131	0.369	0.349	-0.083
YNL277W	MET2	CR	TATA-containing	1	-1.688	0.107	-0.073	0.504	0.656	0.382
YDL110C	TMA17	CR	TATA-containing	1	-2.005	-0.044	-0.045	0.521	0.735	0.498
YKL084W	HOT13	CR		1	-1.863	-0.075	0.405	0.799	4.196	2.392
YCR024C-A	PMP1	CR	TATA-containing	1	-0.637	-0.013	0.259	0.333	0.269	-0.307
YLR079W	SIC1	CR	TATA-containing	1	-1.206	-0.012	0.286	0.705	0.533	-0.402
YPL091W	GLR1	CR	TATA-less	1	-1.828	-0.134	-0.109	0.542	0.373	-0.539
YOR153W	PDR5	CR	TATA-less	1	-0.573	0.075	0.01	0.826	0.557	-0.569
YOL126C	MDH2	CR	TATA-containing	1	-1.1	-0.068	-0.126	0.652	0.49	-0.412
YBR010W	HHT1	CR	TATA-containing	1	-0.814	0.131	0.442	0.712	0.529	-0.429
YOR184W	SER1	CR		1	-1.632	0.026	-0.022	0.408	0.503	0.303
YML116W	ATR1	CR	TATA-containing	1	-1.942	0.213	0.212	0.601	0.423	-0.507
YPL154C	PEP4	CR	TATA-containing	1	-1.024	0.06	0.13	0.402	0.302	-0.414
YGR156W	PTI1	CR	TATA-less	1	-1.676	0.044	0.261	0.454	0.371	-0.293
YDR502C	SAM2	CR	TATA-less	1	-0.97	0.033	0.158	1.065	0.548	-0.958
YLL063C	AYT1	TFIID	TATA-containing	1	-2.229	-0.066	-0.16	0.796	1.146	0.526
YDR365C	ESF1	TFIID	TATA-less	1	-0.461	-0.048	-0.009	0.847	1.178	0.476
YKL068W-A	YKL068W-A	CR	TATA-less	1	-1.129	-0.032	0.24	0.885	0.845	-0.067
YJR121W	ATP2	CR		1	-0.736	-0.021	0.036	1.122	1.015	-0.144
YGR281W	YOR1	CR		1	-1.006	-0.016	-0.051	0.787	1.153	0.552
YNL192W	CHS1	CR	TATA-containing	1	-1.228	-0.014	0.012	0.551	0.49	-0.169
YGR279C	SCW4	CR	TATA-less	1	-0.924	0.112	-0.042	0.925	0.809	-0.193
YER001W	MNN1	CR	TATA-containing	1	-0.855	-0.012	0.026	1.971	0.537	-1.875
YGL009C	LEU1	TFIID	TATA-less	1	-0.743	0.008	0.012	0.44	0.411	-0.099
YPR156C	TPO3	CR	TATA-less	1	-0.994	0.014	-0.086	2.299	0.8	-1.523
YDL125C	HNT1	CR	TATA-less	1	-1.277	-0.007	0.382	0.653	0.812	0.314
YKL081W	TEF4	CR	TATA-less	1	-1.037	-0.031	0.051	0.766	0.593	-0.368
YNR016C	ACC1	CR		1	-0.489	0.096	0.011	0.545	0.351	-0.636
YML058W	SML1	CR	TATA-containing	1	-0.487	0.071	0.279	1.121	0.951	-0.238
YDR085C	AFR1	TFIID		1	-2.269	0.161	-0.319	0.538	0.714	0.408
YBR218C	PYC2	CR	TATA-less	1	-1.185	-0.087	-0.061	1.565	0.698	-1.165
YLR194C	YLR194C	CR	TATA-containing	1	-1.735	0.027	0.237	0.671	0.441	-0.607
YPR080W	TEF1	CR	TATA-less	1	-1.172	0.014	0.046	0.553	0.449	-0.301
YDR132C	YDR132C	CR	TATA-less	1	-3.079	0.153	0.289	0.549	2.172	1.984
YCR065W	HCM1	CR	TATA-less	1	-0.874	0.107	0.066	0.794	0.462	-0.782
YJL048C	UBX6	CR	TATA-less	1	-1.682	-0.026	0.4	4.958	18.155	1.873
YKR071C	DRE2	CR	TATA-less	1	-1.336	-0.002	-0.101	0.525	0.382	-0.46
YMR318C	ADH6	CR	TATA-less	1	-2.694	0.435	0.218	0.453	0.576	0.346
YER052C	HOM3	CR	TATA-containing	1	-1.053	0.049	-0.035	0.632	0.431	-0.551
YPL267W	ACM1	CR	TATA-containing	1	-1.004	-0.024	0.066	0.613	0.329	-0.897
YML007W	YAP1	CR	TATA-less	1	-1.488	0.006	-0.042	1.544	0.834	-0.888
YGR177C	ATF2	CR	TATA-less	1	-1.857	0.015	0.208	1.474	0.91	-0.696
YPR005C	HAL1	CR		1	-1.881	-0.472	-0.043	0.259	1.012	1.964
YGR240C	PFK1	CR	TATA-less	1	-0.532	0.103	0.119	0.874	0.972	0.153
YBR069C	TAT1	CR	TATA-containing	1	-1.187	0.024	0.049	0.586	0.568	-0.043
YLR180W	SAM1	CR	TATA-containing	1	-1.06	-0.027	-0.031	0.671	0.638	-0.071
YNL087W	TCB2	CR	TATA-containing	1	-2.27	0.145	-0.046	0.4	0.453	0.179
YPR119W	CLB2	CR	TATA-less	1	-0.953	-0.076	-0.067	0.528	0.548	0.055
YER175C	TMT1	TFIID		1	-1.445	-0.345	0.26	2.165	0.974	-1.152
YKL178C	STE3	CR		1	-1.956	0.192	0.021	1.789	1.368	-0.387
YDR354W	TRP4	TFIID	TATA-less	1	-1.792	-0.079	0.538	0.514	1.382	1.426
YKL062W	MSN4	TFIID		1	-1.736	0.094	-0.027	0.766	0.642	-0.255
YFL031W	HAC1	CR	TATA-less	1	-0.919	0.123	0.172	0.724	0.686	-0.077
YMR062C	ARG7	TFIID	TATA-containing	1	-1.552	-0.248	0.231	1.357	0.757	-0.843
YNL173C	MDG1	CR	TATA-less	1	-2.711	-0.031	0.136	1.017	1.126	0.147
YGR042W	YGR042W	CR		1	-1.084	-0.167	0.395	0.947	1.731	0.869
YIL117C	PRM5	CR	TATA-less	1	-1.591	0.178	-0.021	0.282	0.398	0.495
YER177W	BMH1	CR	TATA-less	1	-0.767	0.199	0.184	0.6	0.45	-0.415
YDR158W	HOM2	CR	TATA-less	1	-1.492	0.004	0.065	0.879	0.664	-0.405
YDL025C	RTK1	CR	TATA-less	1	-2.752	0.344	0.262	1.182	0.598	-0.984
YOL002C	IZH2	CR	TATA-less	1	-1.403	0.272	0.266	0.995	0.469	-1.087
YBR001C	NTH2	CR	TATA-containing	1	-1.219	-0.059	0.137	0.635	0.495	-0.358
YHR049W	FSH1	CR	TATA-containing	1	-2.516	0.191	0.215	0.692	0.409	-0.759
YJR127C	RSF2	CR	TATA-less	1	-1.443	-0.108	-0.136	0.961	0.209	-2.2
YJL034W	KAR2	CR	TATA-containing	1	-0.739	0.083	0.06	0.783	0.771	-0.023
YIL123W	SIM1	CR	TATA-less	1	-1.076	0.065	-0.048	0.544	0.471	-0.208
YLR254C	NDL1	TFIID	TATA-less	1	-0.825	0.118	0.922	0.548	0.989	0.852
YMR070W	MOT3	CR	TATA-less	1	-1.179	-0.076	-0.233	0.366	0.335	-0.129
YDR089W	YDR089W	CR	TATA-less	1	-1.452	0.034	0.029	0.48	0.303	-0.665
YDR270W	CCC2	CR	TATA-less	1	-1.74	-0.084	-0.208	2.425	2.926	0.271
YBR118W	TEF2	CR	TATA-containing	1	-1.2	0.074	0.022	0.553	0.402	-0.46
YNL065W	AQR1	CR	TATA-containing	1	-0.397	-0.561	0.161	1.064	1.129	0.085
YMR002W	MIX17	CR	TATA-containing	1	-0.767	0.185	0.071	0.586	0.672	0.197
YGR180C	RNR4	CR	TATA-containing	1	-1.151	0.003	0.039	0.287	0.329	0.201
YBL033C	RIB1	CR	TATA-containing	1	-1.352	0.091	0.005	0.879	0.736	-0.256
YLR136C	TIS11	CR	TATA-containing	1	-1.963	-0.034	0.201	1.349	1.286	-0.069
YDR224C	HTB1	CR	TATA-containing	1	-1.347	0.181	0.225	0.618	0.526	-0.232
YHR208W	BAT1	TFIID	TATA-less	1	-0.886	0.023	0.026	0.636	0.661	0.056
YMR272C	SCS7	CR	TATA-less	1	-1.289	-0.127	0.122	0.851	0.987	0.214
YML123C	PHO84	CR	TATA-containing	1	-0.969	0.009	-0.072	0.751	0.654	-0.199
YHR216W	IMD2	CR	TATA-containing	1	-0.445	0.089	0.074	4.649	4.804	0.047
YDL127W	PCL2	CR	TATA-containing	1	-1.704	0.203	0.4	0.437	0.395	-0.143
YDR127W	ARO1	CR	TATA-less	1	-1.1	-0.032	-0.007	0.858	0.799	-0.103
YLR257W	YLR257W	TFIID	TATA-containing	1	-1.479	-0.07	-0.027	0.859	0.547	-0.651
YJL213W	YJL213W	TFIID	TATA-containing	1	-1.547	-0.213	0.149	1.696	0.719	-1.239
YOL136C	PFK27	CR	TATA-containing	1	-1.437	0.116	-0.02	0.528	0.546	0.049
YOL007C	CSI2	CR	TATA-less	1	-0.923	0.113	0.081	0.543	0.65	0.261
YLR214W	FRE1	CR	TATA-less	1	-1.988	-0.138	-0.197	0.895	0.482	-0.893
YMR180C	CTL1	CR		1	-2.327	-0.08	0.491	0.452	0.449	-0.01
YER055C	HIS1	CR	TATA-less	1	-1.35	0.04	0.201	0.745	0.463	-0.686
YOR047C	STD1	CR	TATA-less	1	-1.479	0.231	0.125	0.619	0.492	-0.331
YDR406W	PDR15	CR	TATA-containing	1	-1.403	0.02	0.067	1.165	0.172	-2.759
YDR276C	PMP3	CR	TATA-containing	1	-1.029	-0.092	0.664	0.546	0.474	-0.204
YLR056W	ERG3	CR	TATA-less	1	-1.185	0.229	0.137	0.814	0.657	-0.31
YBR256C	RIB5	CR	TATA-containing	1	-1.79	-0.504	0.006	1.249	0.556	-1.167
YOL143C	RIB4	CR	TATA-containing	1	-2.12	0.181	0.323	0.419	0.303	-0.467
YDL168W	SFA1	CR	TATA-less	1	-1.982	0.068	-0.038	0.593	0.639	0.106
YLL027W	ISA1	CR	TATA-less	1	-1.623	0.05	0.228	0.666	0.756	0.183
YJR016C	ILV3	CR	TATA-less	1	-1.119	0.107	0.114	1.135	0.824	-0.463
YMR015C	ERG5	CR	TATA-containing	1	-1.446	0.155	0.16	0.747	0.542	-0.462
YDR497C	ITR1	CR	TATA-containing	1	-1.085	0.07	0.159	0.606	0.765	0.335
YGL038C	OCH1	CR	TATA-less	1	-1.531	-0.003	0.051	0.36	0.6	0.737
YDR487C	RIB3	CR	TATA-containing	1	-2.227	0.111	0.24	0.659	0.994	0.592
YHR175W	CTR2	CR	TATA-less	1	0.038	-0.587	0.741	7.68	24.146	1.653
YMR266W	RSN1	CR	TATA-containing	1	-1.459	-0.1	-0.142	0.917	0.623	-0.556
YDL183C	YDL183C	CR		1	-1.79	-0.393	0.53	0.537	0.932	0.795
YPL141C	FRK1	CR	TATA-less	1	-1.355	0.212	-0.086	1.009	0.582	-0.793
YHL021C	AIM17	TFIID	TATA-containing	1	-1.948	0.08	0.013	0.665	0.853	0.36
YBR286W	APE3	CR	TATA-containing	1	-1.481	-0.012	0.059	0.425	0.379	-0.166
YLR414C	PUN1	CR	TATA-containing	1	-0.956	-0.135	0.341	0.2	0.133	-0.592
YOR383C	FIT3	CR	TATA-less	1	-2.002	0.053	-0.092	0.634	0.73	0.204
YDL205C	HEM3	CR	TATA-less	1	-1.771	-0.141	0.057	1.801	0.944	-0.932
YBR046C	ZTA1	CR	TATA-less	1	-2.203	-0.645	-0.535	1.659	1.93	0.218
YDR225W	HTA1	CR	TATA-containing	1	-1.182	-0.06	0.119	0.401	0.392	-0.032
YDR195W	REF2	CR	TATA-containing	1	-1.684	-0.016	0.238	1.608	0.683	-1.235
YDR492W	IZH1	CR	TATA-containing	1	-1.429	0.149	0.159	0.665	0.606	-0.136
YHR084W	STE12	CR	TATA-less	1	-1.622	0.015	0.038	0.689	1.291	0.905
YJL196C	ELO1	CR	TATA-containing	1	-1.392	0.244	0.144	1.089	0.676	-0.688
YMR196W	YMR196W	TFIID		1	-1.266	-0.234	0.394	0.387	0.6	0.631
YPR191W	QCR2	TFIID	TATA-containing	1	-0.936	0.109	0.298	0.98	0.886	-0.147
YJL026W	RNR2	CR	TATA-containing	1	-1.764	-0.182	0.13	1.011	0.943	-0.101
YOR063W	RPL3	CR	TATA-containing	1	-1.125	0.046	0.153	0.663	0.509	-0.383
YBR249C	ARO4	CR	TATA-less	1	-1.949	-0.129	0.035	0.793	0.601	-0.401
YLR049C	YLR049C	CR	TATA-less	1	-1.596	0.235	0.279	0.367	0.459	0.322
YLR249W	YEF3	CR	TATA-containing	1	-1.459	0.022	-0.032	0.594	0.512	-0.215
YIL116W	HIS5	CR	TATA-containing	1	-2.202	-0.031	-0.308	0.556	0.514	-0.114
YGL035C	MIG1	TFIID	TATA-less	1	-1.709	0.023	0.131	0.615	0.538	-0.193
YJR045C	SSC1	CR	TATA-less	1	-1.265	0.101	0.065	1.213	0.831	-0.545
YDL198C	GGC1	CR	TATA-less	1	-1.806	0.031	-0.264	1.016	0.891	-0.19
YHL035C	VMR1	CR		1	-1.776	-0.05	0.004	0.227	0.189	-0.259
YBL015W	ACH1	TFIID	TATA-containing	1	-2.032	-0.097	0.247	0.933	0.811	-0.202
YLL024C	SSA2	CR	TATA-containing	1	-1.944	0.045	0.028	0.583	0.499	-0.222
YKR062W	TFA2	TFIID	TATA-less	1	-2.211	-0.028	0.07	0.458	0.606	0.401
YKL125W	RRN3	CR	TATA-containing	1	-2.107	-0.222	0.266	1.013	0.482	-1.072
YGR079W	YGR079W	CR	TATA-less	1	-1.272	-0.028	0.038	0.937	0.922	-0.024
YKR060W	UTP30	CR	TATA-containing	1	-1.989	-0.318	0.425	0.542	0.542	0
YGR204W	ADE3	CR	TATA-containing	1	-1.407	-0.004	-0.048	0.631	0.427	-0.566
YBR162C	TOS1	CR	TATA-less	1	-1.102	0.109	0.122	0.97	0.579	-0.746
YLL039C	UBI4	CR	TATA-containing	1	-1.096	0.266	-0.066	0.726	0.503	-0.531
YLR256W	HAP1	CR	TATA-containing	1	-0.181	0.005	0.033	0.482	0.984	1.03
YLR084C	RAX2	CR	TATA-less	1	-1.262	0.052	-0.005	0.658	0.435	-0.595
YGR040W	KSS1	CR		1	-1.995	-0.029	0.276	0.4	0.143	-1.482
YKL110C	KTI12	TFIID	TATA-less	1	-2.311	0.266	0.408	0.928	0.609	-0.606
YBR088C	POL30	CR	TATA-containing	1	-0.551	0.052	-0.036	0.533	0.554	0.056
YDL170W	UGA3	CR	TATA-less	1	-1.614	0.072	-0.144	0.83	0.591	-0.492
YBR085C-A	YBR085C-A	CR	TATA-containing	1	-2.041	0.304	0.473	1.196	0.673	-0.829
YJL130C	URA2	CR	TATA-less	1	-0.991	-0.03	-0.084	1.285	2.216	0.786
YJL191W	RPS14B	CR	TATA-containing	1	-1.756	0.123	0.446	1.474	1.048	-0.493
YDL241W	YDL241W	TFIID	TATA-containing	1	-2.24	-0.251	0.442	0.317	0.2	-0.666
YDR072C	IPT1	CR	TATA-less	1	-1.557	-0.014	0.116	1.644	0.511	-1.686
YGR197C	SNG1	CR	TATA-less	1	-2.154	-0.233	0.375	1.858	0.647	-1.522
YJL212C	OPT1	CR	TATA-containing	1	-1.592	0.02	-0.017	0.924	0.886	-0.061
YOR025W	HST3	CR	TATA-containing	1	-1.223	-0.049	0.113	0.793	0.546	-0.537
YLR342W	FKS1	CR	TATA-less	1	-0.694	-0.054	0.013	0.682	0.343	-0.994
YCL009C	ILV6	TFIID	TATA-less	1	-1.795	-0.241	0.046	0.599	0.546	-0.133
YJL016W	YJL016W	CR		1	-1.668	0.063	0.068	0.556	0.502	-0.149
YGL224C	SDT1	CR	TATA-containing	1	-1.761	-0.264	0.19	0.423	0.228	-0.892
YKL054C	DEF1	CR	TATA-less	1	-1.653	0.099	0.147	0.85	0.44	-0.949
YML056C	IMD4	TFIID	TATA-containing	1	-1.316	-0.012	0.003	0.302	0.085	-1.819
YAL060W	BDH1	CR	TATA-containing	1	-2.089	0.078	0.635	0.489	0.432	-0.177
YKL151C	YKL151C	TFIID	TATA-containing	1	-0.453	0.082	0.047	0.091	0.082	-0.146
YJR003C	YJR003C	CR	TATA-less	1	-1.508	-0.047	0.123	1.236	1.433	0.213
YMR016C	SOK2	TFIID		1	-2.092	-0.16	0.135	0.586	0.288	-1.023
YMR043W	MCM1	CR	TATA-less	1	-1.653	-0.181	0.02	1.215	1.377	0.181
YKL056C	TMA19	CR	TATA-less	1	-1.368	0.032	0.295	0.437	0.389	-0.171
YGR244C	LSC2	TFIID	TATA-containing	1	-1.941	-0.172	0.041	0.672	0.383	-0.81
YLR034C	SMF3	CR	TATA-less	1	-1.801	0.217	0.21	0.671	0.239	-1.489
YPL221W	FLC1	CR	TATA-less	1	-1.543	0.053	0.021	0.6	0.701	0.224
YHR037W	PUT2	CR	TATA-containing	1	-1.263	-0.041	-0.026	0.788	0.792	0.008
YOR204W	DED1	CR	TATA-containing	1	-1.243	0.053	-0.031	0.858	0.683	-0.33
YEL047C	FRD1	TFIID	TATA-containing	1	-1.991	0.084	0.398	1.143	2.144	0.908
YGR250C	YGR250C	CR	TATA-containing	1	-2.242	-0.161	0.11	0.657	0.391	-0.749
YPR122W	AXL1	CR	TATA-less	1	-1.88	0.141	-0.043	0.505	0.213	-1.244
YNR009W	NRM1	CR	TATA-containing	1	-1.257	-0.243	-0.019	0.861	0.756	-0.188
YPR069C	SPE3	CR	TATA-containing	1	-2.213	-0.062	0.146	1.15	0.408	-1.494
YKR046C	PET10	TFIID		1	-2.591	0.274	0.207	1.593	0.845	-0.915
YMR186W	HSC82	CR	TATA-containing	1	-1.673	-0.017	0.005	0.873	0.761	-0.198
YLR432W	IMD3	CR	TATA-containing	1	-1.092	-0.013	-0.087	1.429	2.039	0.513
YGR161W-C	YGR161W-C	TFIID	TATA-less	1	-0.7	-0.045	0.876	0.475	0.394	-0.267
YGL012W	ERG4	CR	TATA-containing	1	-0.756	0.084	-0.091	0.401	0.43	0.101
YER150W	SPI1	CR	TATA-containing	1	-2.481	-0.024	-0.29	2.75	0.989	-1.475
YDR226W	ADK1	CR	TATA-containing	1	-1.537	0.134	0.395	0.564	0.765	0.44
YHR199C	AIM46	CR	TATA-less	1	-2.389	0.158	-0.03	0.817	0.577	-0.501
YNR060W	FRE4	CR		1	-2.103	-0.254	-0.253	2.459	2.439	-0.012
YHR190W	ERG9	CR	TATA-containing	1	-1.167	0.07	0.028	0.753	0.732	-0.04
YLR299W	ECM38	CR	TATA-containing	1	-2.063	0.028	0.036	0.383	0.07	-2.451
YIR034C	LYS1	TFIID	TATA-containing	1	-2.349	0.175	0.863	1.066	0.85	-0.327
YGR044C	RME1	CR		1	-1.696	0.051	0.111	0.781	0.986	0.337
YER174C	GRX4	TFIID	TATA-less	1	-1.902	0.22	0.406	0.959	2.149	1.164
YCR089W	FIG2	TFIID	TATA-less	1	-2.011	-0.125	-0.147	0.585	1.439	1.298
YLR023C	IZH3	TFIID	TATA-less	1	-1.124	-0.053	-0.142	0.665	0.65	-0.033
YGR222W	PET54	CR	TATA-less	1	-0.9	-0.194	0.035	0.816	1.042	0.352
YER042W	MXR1	CR	TATA-containing	1	-1.378	-0.179	-0.193	0.441	0.142	-1.639
YBL099W	ATP1	TFIID	TATA-less	1	-1.265	0.078	0.025	1.696	1.055	-0.685
YLR113W	HOG1	CR	TATA-less	1	-1.468	0.028	0.426	1.407	1.032	-0.447
YEL065W	SIT1	CR	TATA-containing	1	-1.712	-0.006	-0.079	0.823	0.941	0.194
YEL017C-A	PMP2	CR	TATA-less	1	-1.891	0.186	0.734	0.743	0.921	0.309
YDR037W	KRS1	CR	TATA-containing	1	-2.019	-0.001	-0.002	0.626	0.431	-0.537
YCR004C	YCP4	TFIID	TATA-containing	1	-2.245	-0.196	0.015	0.573	1.525	1.413
YOR142W	LSC1	CR	TATA-containing	1	-2.043	0.149	0.653	0.788	0.549	-0.523
YML052W	SUR7	CR	TATA-less	1	-0.88	0.01	0.053	0.625	0.478	-0.387
YDR529C	QCR7	TFIID	TATA-less	1	-1.228	0.132	0.265	0.635	0.331	-0.941
YDR399W	HPT1	CR	TATA-less	1	-1.936	0.089	0.421	1.045	0.708	-0.561
YDR073W	SNF11	CR	TATA-containing	1	-1.294	-0.027	0.739	0.966	0.958	-0.012
YIL108W	YIL108W	CR	TATA-containing	1	-2.176	-0.108	0.026	1.369	1.089	-0.33
YJR137C	MET5	TFIID		1	-1.914	-0.069	-0.096	1.781	0.641	-1.475
YDR476C	YDR476C	TFIID	TATA-containing	1	-2.809	-0.16	0.141	1.592	1.595	0.003
YOL158C	ENB1	CR	TATA-less	1	-2.131	0.167	0.147	0.909	0.533	-0.77
YGR070W	ROM1	TFIID		1	-1.661	-0.097	-0.161	1.152	0.8	-0.526
YDL117W	CYK3	CR	TATA-less	1	-1.572	-0.013	-0.008	0.41	0.3	-0.453
YLR177W	YLR177W	CR		1	-1.933	0.152	-0.036	1.096	0.201	-2.445
YPL049C	DIG1	CR	TATA-less	1	-1.728	0.154	0.014	0.443	0.426	-0.057
YGR037C	ACB1	TFIID	TATA-containing	1	-1.564	0.003	0.047	0.623	0.588	-0.085
YNL301C	RPL18B	CR	TATA-less	1	-2.015	0.025	0.075	0.838	0.574	-0.546
YDR222W	YDR222W	CR	TATA-containing	1	-1.897	0.159	0.037	1.437	1.148	-0.324
YDR247W	VHS1	CR	TATA-less	1	-2.074	0.151	0.115	0.281	1.049	1.901
YGL016W	KAP122	TFIID	TATA-less	1	-1.628	-0.186	-0.077	3.148	1.239	-1.345
YDL067C	COX9	TFIID	TATA-less	1	-1.757	0.104	0.539	0.865	0.569	-0.605
YML120C	NDI1	TFIID	TATA-containing	1	-1.667	-0.063	0.004	0.584	0.657	0.171
YLR153C	ACS2	CR	TATA-containing	1	-1.402	0	0.114	0.68	0.469	-0.538
YBL016W	FUS3	TFIID	TATA-containing	1	-1.711	-0.01	-0.209	0.93	0.688	-0.436
YNR043W	MVD1	TFIID	TATA-containing	1	-1.68	0.105	-0.126	0.789	0.322	-1.293
YAL014C	SYN8	TFIID	TATA-less	1	-2.369	-0.126	0.009	0.681	0.796	0.224
YPR057W	BRR1	TFIID		1	-2.051	-0.397	0.173	0.804	0.557	-0.528
YIL009W	FAA3	CR	TATA-less	1	-1.635	0.083	0.003	1.024	0.782	-0.388
YBR149W	ARA1	CR	TATA-containing	1	-1.864	-0.004	0.199	0.581	0.455	-0.352
YDR148C	KGD2	TFIID	TATA-less	1	-1.439	-0.324	-0.088	0.735	0.108	-2.761
YNL067W	RPL9B	TFIID	TATA-less	1	-1.052	0.013	0.185	0.63	0.589	-0.098
YDR139C	RUB1	TFIID		1	-2.29	-0.117	0.141	0.737	0.435	-0.761
YBR073W	RDH54	TFIID	TATA-containing	1	-1.12	-0.033	-0.009	0.413	0.441	0.093
YML030W	RCF1	TFIID	TATA-less	1	-1.929	-0.39	0.935	1.433	1.196	-0.261
YGR060W	ERG25	CR	TATA-less	1	-1.341	0.265	0.21	1.634	0.83	-0.978
YOR306C	MCH5	CR	TATA-containing	1	-1.811	0.245	0.221	0.559	0.872	0.641
YBR139W	YBR139W	CR	TATA-containing	1	-1.163	0.062	0.057	0.528	0.265	-0.997
YPR074C	TKL1	TFIID	TATA-containing	1	-1.56	0.022	0.039	1.307	0.84	-0.638
YNL260C	LTO1	CR	TATA-containing	1	-2.452	0.027	0.529	0.403	0.34	-0.247
YNL239W	LAP3	CR	TATA-less	1	-2.1	-0.43	-0.112	0.546	0.398	-0.458
YOR222W	ODC2	CR	TATA-less	1	-1.447	-0.034	0.372	0.221	0.144	-0.618
YLR356W	ATG33	TFIID	TATA-less	1	-2.181	-0.452	-0.07	1.374	0.889	-0.627
YFR030W	MET10	TFIID	TATA-containing	1	-2.117	0.051	-0.041	0.591	0.379	-0.641
YDR019C	GCV1	CR	TATA-containing	1	-1.654	0.014	0.256	2.112	0.732	-1.529
YKL216W	URA1	CR	TATA-containing	1	-1.907	0.223	0.2	0.632	0.544	-0.215
YLL061W	MMP1	CR	TATA-containing	1	-1.96	0.45	0.266	0.592	0.257	-1.203
YBR048W	RPS11B	CR	TATA-less	1	-2.935	0.154	0.005	0.72	0.679	-0.083
YHL047C	ARN2	CR	TATA-less	1	-1.527	0.139	0.062	1.369	0.86	-0.671
YHR104W	GRE3	CR	TATA-containing	1	-2.076	-0.024	-0.099	0.991	1.334	0.428
YJR130C	STR2	TFIID		1	-2.027	-0.205	0.157	0.481	0.288	-0.74
YJR133W	XPT1	CR		1	-1.931	-0.015	-0.227	0.619	0.438	-0.498
YHR001W-A	QCR10	TFIID	TATA-less	1	-2.02	0.19	0.668	0.613	0.658	0.102
YLR040C	AFB1	CR		1	-2.631	0.136	0.266	0.226	0.284	0.329
YBR105C	VID24	TFIID	TATA-containing	1	-1.683	-0.094	0.138	0.85	1.036	0.285
YGR175C	ERG1	CR	TATA-less	1	-1.716	0.01	0.196	0.383	0.142	-1.435
YBR243C	ALG7	CR	TATA-less	1	-2.229	-0.077	0.09	0.488	0.37	-0.4
YHR046C	INM1	CR	TATA-less	1	-2.511	0.298	0.349	1.205	1.14	-0.081
YLL049W	LDB18	CR	TATA-less	1	-2.407	0.128	0.561	0.933	1.239	0.408
YPL019C	VTC3	CR	TATA-less	1	-1.15	-0.021	0.009	0.765	0.66	-0.213
YDL132W	CDC53	TFIID		1	-1.593	-0.064	0.068	1.105	0.622	-0.83
YOR317W	FAA1	TFIID		1	-1.349	-0.158	-0.045	0.777	1.049	0.434
YDL180W	YDL180W	CR	TATA-less	1	-2.546	-0.141	0.144	0.62	0.643	0.053
YKL141W	SDH3	TFIID	TATA-containing	1	-1.413	-0.125	0.38	0.479	0.507	0.084
YPR114W	YPR114W	TFIID	TATA-less	1	-1.481	-0.232	0.243	1.176	0.717	-0.715
YDR171W	HSP42	CR	TATA-containing	1	-1.594	0.111	0.199	0.61	0.53	-0.203
YGL162W	SUT1	TFIID	TATA-containing	1	-2.185	0.039	0.156	0.203	0.221	0.126
YNR032C-A	HUB1	TFIID		1	-2.913	-0.003	1.224	0.798	0.771	-0.05
YPL249C-A	RPL36B	TFIID	TATA-less	1	-2.9	-0.027	0.056	0.589	0.525	-0.164
YJL201W	ECM25	TFIID	TATA-less	1	-1.756	0.019	0.105	1.357	0.809	-0.746
YOR133W	EFT1	TFIID	TATA-less	1	-2.375	0.116	0.04	0.919	0.782	-0.232
YAL005C	SSA1	CR	TATA-containing	1	-2.045	-0.047	-0.084	0.415	0.319	-0.381
YOR298C-A	MBF1	CR	TATA-containing	1	-1.853	0.103	0.239	0.937	0.722	-0.376
YLR354C	TAL1	CR	TATA-containing	1	-2.245	0.112	0.188	0.634	0.6	-0.08
YOR081C	TGL5	CR		1	-1.616	-0.185	0.002	0.404	0.32	-0.339
YNR074C	AIF1	CR	TATA-less	1	-2.245	-0.276	-0.279	3.731	1.406	-1.408
YNL052W	COX5A	TFIID	TATA-less	1	-1.699	-0.141	-0.126	0.778	0.714	-0.123
YLR027C	AAT2	CR	TATA-containing	1	-1.452	0.19	0.343	0.587	0.617	0.07
YPL198W	RPL7B	CR	TATA-containing	1	-1.754	0.086	0.285	1.434	1.021	-0.49
YHR005C	GPA1	TFIID	TATA-less	1	-1.474	-0.12	0.067	0.463	0.293	-0.661
YIL154C	IMP2'	TFIID		1	-2.392	-0.109	-0.111	0.389	0.559	0.524
YAL003W	EFB1	CR	TATA-less	1	-1.595	0.065	0.169	0.733	0.602	-0.284
YPR042C	PUF2	TFIID	TATA-less	1	-1.717	0.095	0.025	0.496	0.504	0.023
YMR226C	YMR226C	CR	TATA-containing	1	-1.851	0.187	-0.106	0.604	0.672	0.156
YDL085C-A	YDL085C-A	TFIID	TATA-less	1	-2.196	-0.21	1.422	0.971	1.069	0.138
YKL008C	LAC1	CR	TATA-less	1	-1.724	0.009	0.128	0.551	0.428	-0.365
YDR214W	AHA1	CR	TATA-less	1	-2.441	0.226	0.166	0.455	0.167	-1.445
YPL066W	RGL1	TFIID	TATA-less	1	-1.808	0.131	0.245	0.436	0.674	0.629
YOR296W	YOR296W	TFIID	TATA-containing	1	-1.816	-0.154	-0.23	1.464	0.533	-1.458
YDL184C	RPL41A	TFIID	TATA-less	1	-1.961	0.036	0.667	0.728	0.669	-0.123
YNL046W	YNL046W	CR	TATA-containing	1	-1.55	-0.057	0.073	0.873	0.734	-0.251
YJL057C	IKS1	TFIID	TATA-containing	1	-2.697	0.129	0.265	0.964	0.661	-0.543
YPR045C	THP3	CR	TATA-less	1	-1.983	0.135	-0.103	0.602	0.659	0.132
YDL087C	LUC7	TFIID	TATA-less	1	-2.375	0.386	0.381	0.436	0.564	0.371
YJL167W	ERG20	CR	TATA-containing	1	-1.543	0.044	0.166	0.63	0.349	-0.852
YOR018W	ROD1	CR	TATA-less	1	-1.782	-0.263	-0.06	1.137	0.351	-1.696
YNL222W	SSU72	TFIID	TATA-less	1	-1.328	-0.357	0.803	1.029	0.31	-1.732
YKL040C	NFU1	CR	TATA-containing	1	-2.057	0.235	0.13	0.321	0.571	0.832
YBR031W	RPL4A	TFIID	TATA-containing	1	-1.816	-0.041	0.11	0.518	0.416	-0.315
YOL030W	GAS5	CR	TATA-containing	1	-1.498	-0.07	-0.222	1.076	0.794	-0.438
YJL138C	TIF2	CR	TATA-containing	1	-1.747	0.154	0.115	0.779	1.074	0.463
YOR297C	TIM18	TFIID	TATA-less	1	-2.246	0.016	0.545	0.799	0.83	0.054
YBR255C-A	YBR255C-A	TFIID	TATA-less	1	-2.551	0.016	0.34	1.081	0.707	-0.614
YDR453C	TSA2	CR	TATA-less	1	-2.287	-0.256	0.143	0.66	0.515	-0.357
YHL048W	COS8	TFIID		1	-1.586	-0.322	0.14	0.33	0.518	0.648
YKL090W	CUE2	TFIID	TATA-less	1	-2.178	-0.165	0.122	1.913	0.647	-1.563
YJL171C	YJL171C	CR	TATA-less	1	-1.853	-0.068	-0.03	0.716	0.752	0.071
YGR065C	VHT1	CR	TATA-containing	1	-2.39	-0.008	0.233	0.448	0.393	-0.189
YPL262W	FUM1	TFIID	TATA-less	1	-1.77	-0.13	0.096	0.63	0.694	0.138
YNL007C	SIS1	CR	TATA-containing	1	-2.1	-0.101	-0.09	0.51	0.537	0.075
YIL122W	POG1	TFIID	TATA-less	1	-1.212	-0.353	0.215	0.263	0.561	1.092
YDR304C	CPR5	TFIID		1	-2.384	-0.147	-0.131	0.539	0.417	-0.37
YPR113W	PIS1	CR	TATA-containing	1	-1.835	-0.04	0.044	0.39	0.707	0.86
YIL065C	FIS1	TFIID	TATA-less	1	-2.211	-0.851	0.021	0.702	0.469	-0.582
YMR265C	YMR265C	CR	TATA-less	1	-2.45	-0.062	0.229	0.511	0.789	0.626
YKL160W	ELF1	TFIID	TATA-less	1	-2.713	0.017	0.387	0.246	0.321	0.383
YJL082W	IML2	CR	TATA-containing	1	-1.981	-0.287	0.116	1.67	0.675	-1.307
YGR009C	SEC9	TFIID	TATA-containing	1	-2.048	-0.043	0.282	0.327	0.643	0.977
YOR152C	YOR152C	CR		1	-2.146	-0.009	0.266	1.14	1.548	0.442
YLR390W-A	CCW14	CR	TATA-less	1	-2.01	-0.042	0.232	0.654	0.789	0.271
YDR385W	EFT2	TFIID	TATA-less	1	-2.176	-0.122	-0.03	0.875	0.664	-0.397
YOR332W	VMA4	TFIID	TATA-containing	1	-2.69	0.255	0.698	0.586	0.713	0.284
YDR228C	PCF11	TFIID	TATA-less	1	-2.008	0.111	0.255	1.529	0.546	-1.485
YNL079C	TPM1	TFIID	TATA-less	1	-2.121	-0.307	-0.079	0.767	0.611	-0.33
YKL101W	HSL1	CR	TATA-less	1	-1.38	-0.004	-0.181	0.707	0.547	-0.37
YIL136W	OM45	TFIID	TATA-containing	1	-2.607	-0.133	0.117	0.743	0.706	-0.073
YPL078C	ATP4	TFIID	TATA-less	1	-1.557	-0.165	-0.115	0.831	0.859	0.048
YHR183W	GND1	CR	TATA-containing	1	-1.876	0.021	0.031	0.666	0.628	-0.085
YNL040W	YNL040W	TFIID	TATA-less	1	-1.561	-0.579	-0.025	1.471	1.313	-0.164
YHR025W	THR1	TFIID	TATA-less	1	-2.207	-0.293	0.004	0.678	0.541	-0.327
YMR061W	RNA14	TFIID	TATA-less	1	-1.863	0.06	0.099	2.129	1.255	-0.763
YKR069W	MET1	TFIID	TATA-containing	1	-2.135	-0.222	0.066	0.491	0.427	-0.201
YER090W	TRP2	TFIID	TATA-less	1	-1.747	-0.281	0.059	0.631	0.176	-1.844
YGL191W	COX13	TFIID	TATA-less	1	-1.923	-0.196	0.16	0.634	0.538	-0.236
YKL039W	PTM1	CR	TATA-containing	1	-1.884	-0.08	-0.004	0.608	0.353	-0.785
YJL012C	VTC4	CR	TATA-less	1	-1.406	0.031	-0.034	0.375	0.275	-0.45
YNL112W	DBP2	TFIID	TATA-containing	1	-1.732	-0.089	-0.147	1.269	1.755	0.467
YIL107C	PFK26	TFIID	TATA-less	1	-2.101	-0.378	-0.173	1.538	0.896	-0.779
YBL045C	COR1	TFIID	TATA-less	1	-1.744	0.03	-0.043	1.046	0.935	-0.163
YMR108W	ILV2	TFIID	TATA-containing	1	-1.811	0.166	0.132	0.563	0.425	-0.404
YJR111C	YJR111C	TFIID		1	-2.353	-0.108	0.005	0.508	0.244	-1.059
YGR167W	CLC1	TFIID	TATA-less	1	-2.068	0.097	-0.084	0.602	0.539	-0.157
YPR051W	MAK3	TFIID	TATA-less	1	-2.309	-0.214	-0.151	0.5	0.671	0.424
YDL160C	DHH1	TFIID	TATA-less	1	-1.845	0.053	-0.027	0.5	0.31	-0.689
YOR120W	GCY1	TFIID		1	-2.119	-0.122	-0.124	0.498	0.15	-1.726
YGR134W	CAF130	TFIID	TATA-less	1	-2.02	-0.15	0.011	0.581	0.639	0.136
YBR222C	PCS60	TFIID	TATA-containing	1	-1.805	-0.079	-0.137	1.602	0.661	-1.276
YGR097W	ASK10	TFIID	TATA-less	1	-1.207	-0.052	0.037	1.446	0.554	-1.384
YMR009W	ADI1	TFIID	TATA-containing	1	-2.494	0.06	0.183	0.272	0.969	1.835
YBL038W	MRPL16	TFIID	TATA-less	1	-1.969	-0.105	-0.151	0.843	0.492	-0.777
YPL095C	EEB1	CR	TATA-containing	1	-2.359	0.182	0.324	0.357	0.611	0.774
YML129C	COX14	TFIID	TATA-less	1	-2.443	0.388	0.735	0.63	0.59	-0.095
YGL245W	GUS1	TFIID	TATA-less	1	-2.043	0.009	0.08	0.542	0.659	0.283
YDR063W	AIM7	TFIID		1	-2.285	-0.064	0.456	0.439	1.141	1.378
YLR367W	RPS22B	TFIID		1	-2.45	-0.057	0.088	0.548	0.316	-0.793
YKL016C	ATP7	TFIID	TATA-containing	1	-1.646	-0.168	-0.057	0.501	0.456	-0.137
YMR316W	DIA1	CR	TATA-containing	1	-2.084	-0.464	0.005	0.754	1.545	1.034
YDR186C	YDR186C	TFIID	TATA-less	1	-1.443	-0.066	0.077	0.163	0.081	-1.014
YLL026W	HSP104	CR	TATA-containing	1	-2.201	-0.08	-0.039	0.445	0.488	0.136
YOR260W	GCD1	TFIID	TATA-less	1	-1.665	-0.173	-0.052	0.693	0.612	-0.181
YLL007C	YLL007C	TFIID	TATA-less	1	-2.187	0.364	0.262	1.439	0.633	-1.186
YML016C	PPZ1	TFIID	TATA-containing	1	-1.866	0.238	0.227	1.243	0.871	-0.513
YPR009W	SUT2	TFIID	TATA-less	1	-2.669	-0.111	0.494	0.609	0.532	-0.195
YOR185C	GSP2	TFIID	TATA-less	1	-2.485	-0.121	0.953	0.938	1.075	0.196
YLR173W	YLR173W	TFIID		1	-1.668	-0.15	0.278	0.461	0.561	0.283
YDL126C	CDC48	TFIID	TATA-less	1	-1.641	-0.133	-0.002	0.783	0.581	-0.43
YDR194C	MSS116	TFIID	TATA-containing	1	-1.468	-0.064	0.093	0.752	0.471	-0.674
YDR258C	HSP78	TFIID	TATA-containing	1	-2.545	0.141	0.242	0.399	0.44	0.142
YOR194C	TOA1	TFIID	TATA-less	1	-2.149	-0.123	0.028	0.39	0.511	0.393
YGR159C	NSR1	TFIID	TATA-less	1	-2.271	0.103	0.206	0.914	0.688	-0.411
YHR030C	SLT2	TFIID		1	-2.098	-0.048	0.183	0.638	0.556	-0.198
YPR200C	ARR2	TFIID		1	-2.288	-0.71	0.286	0.287	0.701	1.289
YGL019W	CKB1	TFIID		1	-2.217	0.012	0.031	0.294	0.467	0.671
YGL077C	HNM1	CR	TATA-containing	1	-1.806	0.243	0.044	0.671	0.592	-0.179
YKL142W	MRP8	TFIID	TATA-less	1	-2.201	-0.002	0.083	1.538	1.36	-0.178
YIL111W	COX5B	CR	TATA-containing	1	-2.845	0.407	0.791	0.709	0.82	0.21
YOR316C	COT1	TFIID		1	-1.398	-0.465	0.216	0.346	0.23	-0.589
YPR115W	RGC1	TFIID	TATA-less	1	-1.452	0.112	0.201	1.194	0.983	-0.281
YLR295C	ATP14	TFIID	TATA-less	1	-1.771	-0.03	0.158	0.483	0.558	0.208
YGR239C	PEX21	CR	TATA-less	1	-2.198	-0.194	0.34	0.366	0.244	-0.585
YGR154C	GTO1	TFIID		1	-2.672	0.015	0.458	0.678	0.466	-0.541
YJL065C	DLS1	TFIID	TATA-less	1	-2.172	-0.199	0.395	0.971	0.96	-0.017
YGR130C	YGR130C	TFIID	TATA-less	1	-2.005	-0.03	-0.189	0.531	0.48	-0.146
YML126C	ERG13	TFIID	TATA-containing	1	-1.748	0.15	0.097	0.863	0.538	-0.682
YOR305W	RRG7	TFIID		1	-2.046	-0.536	0.041	0.44	0.359	-0.294
YHR039C-A	VMA10	TFIID	TATA-less	1	-2.721	0.212	0.533	0.607	0.522	-0.218
YJL141C	YAK1	TFIID	TATA-less	1	-1.474	-0.066	-0.042	0.536	0.53	-0.017
YBR199W	KTR4	TFIID	TATA-less	1	-1.656	-0.127	0.064	0.673	0.663	-0.021
YGR136W	LSB1	CR	TATA-containing	1	-1.61	-0.404	0.041	0.807	1.051	0.381
YER123W	YCK3	TFIID	TATA-less	1	-1.666	-0.226	0.024	1.115	0.937	-0.252
YHR051W	COX6	TFIID	TATA-less	1	-1.815	-0.229	-0.438	0.45	0.393	-0.198
YMR319C	FET4	CR	TATA-containing	1	-2.201	0.173	0.198	1.024	1.416	0.468
YGL189C	RPS26A	TFIID	TATA-less	1	-2.625	0.115	-0.076	0.769	0.737	-0.062
YPL190C	NAB3	TFIID	TATA-less	1	-2	0.148	0.122	0.634	0.61	-0.055
YER031C	YPT31	TFIID	TATA-less	1	-2.216	-0.116	0.049	0.56	0.812	0.535
YHR007C	ERG11	CR	TATA-containing	1	-1.814	0.009	0.098	0.808	0.491	-0.718
YMR074C	YMR074C	CR	TATA-less	1	-2.361	-0.34	0.664	0.739	1.015	0.458
YMR096W	SNZ1	TFIID		1	-2.581	0.455	-0.098	1.076	1.44	0.421
YKL001C	MET14	TFIID	TATA-containing	1	-1.966	-0.562	-0.445	0.745	1.038	0.478
YBL084C	CDC27	TFIID	TATA-less	1	-2.016	0.165	0.377	1.671	2.225	0.413
YBR039W	ATP3	TFIID	TATA-less	1	-1.823	0.192	0.047	0.449	0.66	0.557
YDL185W	VMA1	TFIID	TATA-less	1	-2.242	0.039	0.017	0.353	0.204	-0.792
YML074C	FPR3	TFIID	TATA-less	1	-1.972	-0.336	-0.071	0.378	0.518	0.455
YDR297W	SUR2	TFIID	TATA-containing	1	-2.123	-0.001	-0.049	1.168	1.338	0.196
YDL099W	BUG1	TFIID		1	-1.77	-0.101	-0.443	0.501	0.398	-0.333
YMR177W	MMT1	CR	TATA-less	1	-2.587	-0.009	0.198	0.793	0.746	-0.087
YDR069C	DOA4	CR	TATA-less	1	-2.061	-0.156	-0.075	0.293	0.286	-0.034
YKR045C	YKR045C	TFIID	TATA-containing	1	-2.449	-0.171	-0.111	0.275	0.39	0.503
YMR179W	SPT21	TFIID		1	-1.613	-0.123	-0.049	1.046	1.166	0.157
YJR139C	HOM6	TFIID	TATA-less	1	-2.209	0.076	0.18	0.716	0.631	-0.183
YOR058C	ASE1	TFIID	TATA-less	1	-2.161	-0.107	-0.047	0.787	0.526	-0.579
YDR143C	SAN1	TFIID	TATA-less	1	-1.902	-0.142	0.099	1.165	0.617	-0.917
YER035W	EDC2	CR	TATA-containing	1	-1.601	-0.146	-0.529	0.513	0.27	-0.926
YHR166C	CDC23	TFIID		1	-2.016	-0.289	0.159	0.575	0.984	0.775
YMR311C	GLC8	TFIID	TATA-less	1	-1.873	-0.074	0.198	0.772	0.312	-1.304
YOR311C	DGK1	TFIID	TATA-containing	1	-1.632	0.131	0.509	1.259	0.846	-0.573
YNL177C	MRPL22	TFIID	TATA-less	1	-1.734	-0.271	-0.351	0.431	0.443	0.037
YJR059W	PTK2	CR	TATA-containing	1	-1.711	-0.121	-0.002	0.692	0.681	-0.024
YKL148C	SDH1	TFIID	TATA-containing	1	-1.704	0.106	0.016	0.773	0.794	0.04
YDL120W	YFH1	TFIID	TATA-less	1	-2.093	-0.148	0.293	1.033	0.714	-0.534
YHR128W	FUR1	CR	TATA-containing	1	-1.676	-0.001	-0.159	1.239	0.813	-0.608
YPL199C	YPL199C	TFIID	TATA-less	1	-2.91	0.239	0.46	0.466	0.787	0.757
YDL075W	RPL31A	TFIID	TATA-less	1	-2.583	0.007	0.325	0.334	0.256	-0.384
YLL055W	YCT1	CR		1	-2.571	0.058	0.207	0.615	0.479	-0.36
YCL043C	PDI1	CR	TATA-containing	1	-1.313	-0.002	0.002	0.723	0.399	-0.858
YAL044C	GCV3	TFIID	TATA-containing	1	-2.057	-0.104	0.07	0.604	0.677	0.163
YNL176C	TDA7	CR	TATA-less	1	-2.361	-0.014	-0.068	0.756	0.964	0.351
YDL084W	SUB2	TFIID	TATA-less	1	-2.093	0.094	0.022	0.748	0.495	-0.596
YBR092C	PHO3	CR	TATA-containing	1	-2.301	-0.019	0.181	0.661	0.776	0.231
YDL074C	BRE1	TFIID	TATA-less	1	-1.848	0.115	0.048	0.589	0.45	-0.389
YNL064C	YDJ1	TFIID	TATA-containing	1	-2.071	0.045	0.005	0.63	0.496	-0.344
YPL152W	RRD2	TFIID	TATA-less	1	-2.414	0.322	0.157	0.491	0.442	-0.152
YCR088W	ABP1	TFIID	TATA-less	1	-2.236	0.165	0.061	0.742	0.407	-0.865
YMR134W	ERG29	TFIID	TATA-containing	1	-2.311	0.04	0.335	0.292	0.241	-0.28
YGL202W	ARO8	TFIID	TATA-less	1	-2.095	-0.024	0.17	0.545	0.769	0.497
YCR031C	RPS14A	TFIID	TATA-containing	1	-2.883	0.157	0.377	0.36	0.331	-0.122
YOR108W	LEU9	TFIID	TATA-less	1	-1.696	0.074	0.221	1.278	0.677	-0.917
YGR214W	RPS0A	TFIID	TATA-less	1	-3	-0.008	0.085	0.664	0.724	0.124
YBR201C-A	YBR201C-A	TFIID	TATA-containing	1	-2.181	-0.093	-0.276	0.402	1.284	1.677
YBR177C	EHT1	CR		1	-2.317	0.095	0.113	1.002	0.503	-0.994
YER044C	ERG28	CR	TATA-containing	1	-1.849	-0.307	0.086	0.933	0.631	-0.564
YGL195W	GCN1	TFIID	TATA-less	1	-1.793	0.045	-0.009	0.572	0.609	0.09
YDL133C-A	RPL41B	TFIID	TATA-containing	1	-2.268	0.21	0.563	0.851	0.91	0.097
YNR018W	RCF2	TFIID	TATA-containing	1	-2.555	-0.175	0.015	0.678	0.381	-0.832
YJR005W	APL1	TFIID	TATA-less	1	-2.247	0.243	0.28	1.827	0.915	-0.999
YPR133C	SPN1	TFIID	TATA-containing	1	-1.87	-0.023	-0.141	0.235	0.409	0.795
YDR411C	DFM1	TFIID	TATA-less	1	-1.714	0.045	-0.003	0.864	0.548	-0.657
YIL052C	RPL34B	TFIID	TATA-less	1	-2.786	0.174	0.676	0.645	0.24	-1.426
YOR198C	BFR1	TFIID	TATA-less	1	-1.909	0.028	0.057	0.625	0.855	0.454
YKR089C	TGL4	TFIID	TATA-less	1	-1.785	0.033	0.034	0.422	0.275	-0.616
YDR035W	ARO3	TFIID	TATA-less	1	-2.205	0.018	-0.359	0.537	0.841	0.646
YJL049W	YJL049W	TFIID	TATA-less	1	-2.199	-0.208	0.179	0.881	0.564	-0.644
YLR287C-A	RPS30A	CR	TATA-less	1	-2.779	0.193	0.111	0.399	0.265	-0.588
YKR059W	TIF1	TFIID	TATA-less	1	-2.191	0.269	0.274	0.455	0.56	0.297
YBL051C	PIN4	TFIID	TATA-less	1	-1.699	0.019	-0.175	1.165	1.04	-0.164
YFR040W	SAP155	TFIID	TATA-less	1	-1.824	0.101	0.004	0.861	0.925	0.103
YGL151W	NUT1	TFIID	TATA-less	1	-1.764	-0.032	-0.031	0.628	0.548	-0.197
YMR142C	RPL13B	TFIID	TATA-less	1	-2.996	0.078	0.09	0.793	0.74	-0.1
YPR086W	SUA7	TFIID	TATA-less	1	-2.152	0.07	0.101	0.56	0.53	-0.08
YDL106C	PHO2	TFIID	TATA-less	1	-1.5	-0.171	-0.249	0.7	0.547	-0.358
YOL059W	GPD2	TFIID	TATA-less	1	-1.117	0.076	0.053	1.055	0.87	-0.277
YDR378C	LSM6	TFIID	TATA-less	1	-2.159	0.295	0.715	0.558	0.39	-0.518
YHR155W	YSP1	TFIID	TATA-less	1	-1.345	0.002	-0.41	0.187	0.107	-0.807
YHL034C	SBP1	TFIID	TATA-less	1	-2.218	0.144	-0.118	0.4	0.755	0.915
YPL127C	HHO1	CR	TATA-less	1	-1.338	0.061	0.004	0.385	0.495	0.364
YPL202C	AFT2	CR	TATA-less	1	-2.547	-0.02	0.242	0.628	0.618	-0.025
YLL018C	DPS1	TFIID	TATA-less	1	-2.115	-0.154	-0.003	0.61	0.635	0.057
YDL065C	PEX19	TFIID	TATA-less	1	-1.53	-0.386	-0.271	0.281	0.414	0.558
YML059C	NTE1	TFIID	TATA-less	1	-1.804	0.017	0.008	0.449	0.492	0.132
YPL184C	MRN1	TFIID		1	-1.857	0.121	0.014	1.111	0.719	-0.627
YJR065C	ARP3	TFIID	TATA-less	1	-1.938	0.073	0.204	0.612	0.46	-0.411
YOR066W	MSA1	TFIID	TATA-less	1	-1.994	-0.174	-0.14	0.283	0.169	-0.742
YMR032W	HOF1	TFIID	TATA-less	1	-1.872	-0.139	0.144	0.602	1.202	0.997
YMR255W	GFD1	TFIID	TATA-less	1	-2.132	-0.226	0.12	0.592	0.639	0.112
YGL059W	PKP2	TFIID		1	-1.796	-0.099	-0.188	0.899	0.643	-0.484
YMR220W	ERG8	TFIID	TATA-containing	1	-2.021	0.251	0.126	0.871	1.049	0.268
YOR158W	PET123	TFIID	TATA-less	1	-2.029	0.232	0.146	0.544	0.662	0.283
YBL103C	RTG3	TFIID	TATA-less	1	-1.823	0.004	-0.234	0.675	0.867	0.36
YLR376C	PSY3	TFIID		1	-2.058	-0.493	-0.085	0.369	0.365	-0.015
YLR247C	IRC20	TFIID	TATA-less	1	-1.82	-0.015	-0.124	1.204	0.653	-0.883
YJL144W	YJL144W	CR	TATA-containing	1	-2.771	0.334	0.514	1.446	2.226	0.623
YNL108C	YNL108C	TFIID	TATA-containing	1	-1.967	-0.137	0.602	0.611	0.86	0.493
YDL145C	COP1	TFIID	TATA-less	1	-1.712	-0.073	-0.072	1.098	0.682	-0.688
YHR165C	PRP8	TFIID	TATA-containing	1	-1.735	0.083	0.045	0.913	0.589	-0.633
YIL144W	NDC80	TFIID	TATA-less	1	-1.939	-0.056	0.327	0.389	0.436	0.163
YIL049W	DFG10	TFIID	TATA-containing	1	-2.843	0.512	0.855	0.691	0.528	-0.388
YGL157W	ARI1	CR	TATA-containing	1	-1.933	0.214	0.557	0.681	0.44	-0.632
YEL052W	AFG1	TFIID	TATA-less	1	-2.65	-0.017	-0.089	0.623	0.714	0.197
YJL053W	PEP8	TFIID	TATA-containing	1	-1.858	-0.18	-0.087	0.613	0.452	-0.439
YIL125W	KGD1	TFIID	TATA-less	1	-1.809	-0.141	0.112	2.386	1.072	-1.154
YPR082C	DIB1	TFIID	TATA-less	1	-2.153	0.236	0.296	0.831	0.991	0.254
YLR259C	HSP60	TFIID	TATA-containing	1	-2.051	0.035	0.113	0.777	0.748	-0.054
YLR340W	RPP0	TFIID	TATA-less	1	-2.845	0.048	0.275	0.349	0.342	-0.028
YKR080W	MTD1	TFIID	TATA-less	1	-2.308	0.121	0.294	1.359	0.337	-2.011
YOR370C	MRS6	TFIID	TATA-less	1	-1.926	-0.04	-0.032	0.411	0.285	-0.528
YOL019W	YOL019W	CR	TATA-less	1	-1.629	0.105	-0.049	1.092	0.499	-1.13
YPL260W	YPL260W	TFIID	TATA-less	1	-1.912	0.171	0.108	0.472	0.308	-0.614
YER003C	PMI40	TFIID	TATA-less	1	-1.855	-0.133	0.16	0.459	0.759	0.725
YKR064W	OAF3	TFIID	TATA-less	1	-2.304	0.325	0.398	0.58	0.996	0.78
YJL062W-A	COA3	TFIID		1	-2.016	-0.468	-0.099	0.898	0.66	-0.444
YKR095W	MLP1	TFIID	TATA-less	1	-1.768	0.102	0.097	0.442	0.542	0.294
YML128C	MSC1	CR	TATA-less	1	-2.296	0.285	0.29	0.425	0.526	0.307
YMR065W	KAR5	TFIID	TATA-less	1	-2.514	0.122	0.461	0.489	1.056	1.11
YLL048C	YBT1	TFIID	TATA-containing	1	-1.818	-0.169	-0.266	0.887	0.874	-0.021
YPR056W	TFB4	TFIID		1	-1.905	-0.452	-0.12	1.353	1.619	0.259
YCL035C	GRX1	TFIID	TATA-containing	1	-1.762	0.026	0.066	0.598	0.363	-0.722
YDL215C	GDH2	TFIID	TATA-less	1	-2.005	-0.063	0.231	1.275	0.967	-0.399
YGL068W	MNP1	TFIID	TATA-less	1	-1.7	-0.258	0.211	0.731	0.48	-0.609
YBR130C	SHE3	TFIID		1	-1.849	-0.139	0.119	0.519	1.04	1.002
YDR175C	RSM24	TFIID	TATA-less	1	-2.106	-0.071	-0.184	0.693	0.61	-0.184
YBR248C	HIS7	TFIID	TATA-less	1	-2.226	-0.202	-0.013	0.326	0.734	1.169
YGL206C	CHC1	TFIID	TATA-less	1	-1.928	0.084	-0.035	0.552	0.409	-0.433
YER009W	NTF2	TFIID		1	-2.249	-0.111	0.231	0.78	0.602	-0.375
YEL072W	RMD6	TFIID	TATA-less	1	-2.664	0.432	0.321	1.767	0.696	-1.345
YDR388W	RVS167	TFIID	TATA-less	1	-1.893	-0.233	-0.102	0.494	0.571	0.21
YDR210W	YDR210W	CR	TATA-containing	1	-1.951	0.182	0.754	0.63	0.51	-0.304
YDL171C	GLT1	TFIID	TATA-less	1	-1.77	0.002	-0.016	4.087	1.762	-1.214
YPL081W	RPS9A	TFIID	TATA-less	1	-2.067	0.038	0.379	0.912	0.478	-0.933
YNL261W	ORC5	TFIID	TATA-containing	1	-2.366	0.086	0.263	0.567	0.726	0.356
YNL003C	PET8	TFIID	TATA-containing	1	-2.429	-0.3	0.321	0.495	0.694	0.487
YKL010C	UFD4	TFIID		1	-1.783	-0.101	-0.235	1.059	0.79	-0.423
YLR064W	PER33	CR	TATA-less	1	-1.883	-0.004	-0.05	0.405	0.216	-0.906
YER178W	PDA1	TFIID	TATA-less	1	-2.598	0.017	0.213	0.578	0.897	0.634
YDR409W	SIZ1	TFIID	TATA-less	1	-1.863	0.162	0.093	0.431	0.425	-0.023
YDL191W	RPL35A	TFIID	TATA-less	1	-2.808	0.163	0.302	0.327	0.385	0.238
YDL086W	YDL086W	TFIID	TATA-containing	1	-2.425	-0.339	0.313	0.623	0.715	0.198
YFL039C	ACT1	TFIID	TATA-less	1	-2.608	0.025	0.123	0.505	0.442	-0.194
YDR370C	DXO1	TFIID	TATA-less	1	-2.25	-0.365	-0.156	1.239	0.856	-0.534
YKL087C	CYT2	TFIID	TATA-containing	1	-2.085	-0.235	0.146	0.536	0.761	0.506
YER074W-A	YOS1	TFIID	TATA-less	1	-2.457	0.152	0.011	0.824	1.895	1.201
YDL147W	RPN5	TFIID	TATA-less	1	-1.833	0.035	-0.007	0.62	0.766	0.307
YDL146W	LDB17	TFIID	TATA-less	1	-1.933	-0.073	-0.106	0.918	1.227	0.418
YIR035C	YIR035C	TFIID	TATA-containing	1	-2.073	-0.091	-0.153	0.897	0.774	-0.212
YKR011C	YKR011C	TFIID	TATA-less	1	-1.938	-0.142	0.117	0.727	0.651	-0.158
YML048W	GSF2	CR	TATA-containing	1	-1.824	0.065	0.411	0.706	0.928	0.393
YOR075W	UFE1	TFIID	TATA-less	1	-1.89	0.03	-0.004	0.768	0.433	-0.826
YNL118C	DCP2	TFIID	TATA-less	1	-1.813	-0.016	-0.033	0.886	0.746	-0.248
YGR119C	NUP57	TFIID	TATA-less	1	-1.929	0.129	0.086	0.591	0.65	0.138
YNL217W	YNL217W	CR	TATA-less	1	-2.416	0.26	0.413	0.822	0.885	0.107
YOR093C	YOR093C	TFIID	TATA-less	1	-1.842	-0.027	-0.16	2.001	1.177	-0.765
YJL217W	REE1	TFIID	TATA-less	1	-2.495	-0.281	0.179	0.767	0.355	-1.112
YGR143W	SKN1	TFIID	TATA-containing	1	-1.816	0.032	-0.147	0.684	0.775	0.18
YKL028W	TFA1	TFIID	TATA-less	1	-1.999	-0.096	0.071	0.334	0.506	0.6
YDR177W	UBC1	TFIID	TATA-less	1	-1.804	-0.172	0.041	0.964	1.049	0.122
YDR427W	RPN9	TFIID	TATA-less	1	-1.85	0.158	0.22	0.331	0.463	0.483
YDL081C	RPP1A	TFIID	TATA-less	1	-2.977	-0.062	0.286	0.481	0.456	-0.077
YDR322C-A	TIM11	TFIID	TATA-containing	1	-2.103	0.316	0.231	0.498	0.383	-0.377
YBR253W	SRB6	TFIID		1	-2.291	0.146	0.809	0.848	0.715	-0.246
YER023W	PRO3	TFIID	TATA-less	1	-2.317	-0.065	0.354	0.69	0.663	-0.059
YML130C	ERO1	CR	TATA-less	1	-2.032	0.128	0.203	0.526	0.411	-0.356
YML009C	MRPL39	TFIID	TATA-less	1	-2.066	0.022	0.66	0.682	1.102	0.693
YOR289W	YOR289W	TFIID	TATA-less	1	-2.685	-0.03	0.353	0.47	0.385	-0.287
YIL131C	FKH1	TFIID	TATA-less	1	-2.006	-0.03	0.157	0.349	0.161	-1.114
YER161C	SPT2	TFIID	TATA-less	1	-1.958	-0.065	0.186	0.605	0.357	-0.761
YNL213C	RRG9	TFIID	TATA-less	1	-2.42	0.488	0.096	0.479	0.454	-0.076
YPL047W	SGF11	TFIID	TATA-less	1	-2.558	0.075	0.086	0.584	0.99	0.762
YMR258C	ROY1	TFIID	TATA-less	1	-2.163	-0.083	0.032	0.569	0.355	-0.683
YDR457W	TOM1	TFIID	TATA-less	1	-1.706	-0.109	-0.042	0.524	0.563	0.103
YDL052C	SLC1	TFIID	TATA-less	1	-2.161	-0.058	0.287	0.688	0.519	-0.406
YLR200W	YKE2	TFIID		1	-2.532	-0.039	-0.06	0.442	0.36	-0.297
YBL047C	EDE1	TFIID	TATA-less	1	-2.065	0.136	0.037	0.455	0.476	0.065
YHR036W	BRL1	TFIID	TATA-less	1	-2.38	-0.222	0.031	2.274	0.804	-1.501
YMR031C	EIS1	CR	TATA-less	1	-1.677	-0.119	-0.095	0.913	0.663	-0.462
YIL138C	TPM2	TFIID	TATA-containing	1	-2.416	-0.022	0.156	0.48	0.361	-0.412
YML008C	ERG6	CR	TATA-less	1	-1.645	0.048	-0.008	0.504	0.327	-0.625
YGR185C	TYS1	TFIID	TATA-less	1	-1.855	-0.175	-0.109	0.329	0.365	0.147
YNL098C	RAS2	TFIID	TATA-less	1	-1.993	0.006	0.021	0.457	0.349	-0.391
YDL029W	ARP2	CR	TATA-less	1	-2.052	-0.095	0.263	0.458	0.402	-0.188
YER056C-A	RPL34A	TFIID	TATA-less	1	-3.279	-0.014	0.177	0.623	0.392	-0.669
YLR421C	RPN13	TFIID	TATA-less	1	-2.291	-0.067	0.131	0.351	0.221	-0.668
YJL166W	QCR8	TFIID	TATA-less	1	-1.667	0.036	0.001	0.52	0.644	0.31
YGL105W	ARC1	TFIID	TATA-less	1	-2.093	0.104	-0.03	0.522	0.524	0.005
YOR261C	RPN8	TFIID	TATA-less	1	-1.863	0.093	0.117	0.455	0.46	0.016
YJL136C	RPS21B	TFIID	TATA-less	1	-3.372	0.146	0.072	0.529	0.606	0.196
YDL229W	SSB1	TFIID	TATA-containing	1	-2.323	-0.08	-0.03	0.519	0.498	-0.058
YGR089W	NNF2	TFIID	TATA-less	1	-1.793	-0.099	-0.086	0.51	0.423	-0.271
YDR013W	PSF1	TFIID	TATA-less	1	-1.981	-0.171	-0.208	1.286	0.745	-0.787
YJR042W	NUP85	TFIID	TATA-less	1	-1.919	-0.185	-0.006	0.62	0.701	0.177
YOR117W	RPT5	TFIID	TATA-less	1	-1.899	0.123	-0.075	0.767	0.543	-0.499
YGL194C	HOS2	TFIID	TATA-less	1	-1.742	-0.06	0.071	1.257	2.126	0.758
YKL210W	UBA1	TFIID	TATA-less	1	-1.891	-0.086	-0.055	2.832	6.562	1.212
YGR135W	PRE9	TFIID	TATA-less	1	-1.938	-0.133	-0.053	0.468	0.496	0.083
YLR447C	VMA6	TFIID	TATA-less	1	-2.343	0.096	0.253	0.787	0.555	-0.505
YML114C	TAF8	TFIID	TATA-less	1	-2.089	0.083	0.38	0.61	0.608	-0.006
YFL045C	SEC53	TFIID	TATA-less	1	-1.679	0.103	-0.073	0.454	0.321	-0.499
YER112W	LSM4	TFIID	TATA-less	1	-2.07	-0.028	-0.04	0.439	0.412	-0.091
YDL189W	RBS1	TFIID	TATA-less	1	-2.19	-0.109	0.222	1.378	0.946	-0.543
YMR242C	RPL20A	TFIID	TATA-less	1	-2.827	0.14	0.217	0.823	0.789	-0.06
YOR232W	MGE1	TFIID	TATA-less	1	-1.934	0.078	0.326	0.632	0.818	0.372
YGR027C	RPS25A	TFIID	TATA-less	1	-3.113	0.15	0.419	0.365	0.459	0.331
YDL225W	SHS1	TFIID	TATA-less	1	-1.76	-0.001	-0.153	0.351	0.468	0.417
YPL011C	TAF3	TFIID	TATA-less	1	-2.005	-0.142	0.046	0.366	0.63	0.785
YGL086W	MAD1	TFIID	TATA-less	1	-1.95	-0.021	0.053	0.525	0.651	0.31
YKL204W	EAP1	TFIID	TATA-less	1	-1.792	-0.101	0.01	0.799	0.401	-0.994
YNL053W	MSG5	TFIID	TATA-less	1	-2.041	-0.123	0.195	1.157	0.519	-1.157
YJL140W	RPB4	TFIID	TATA-less	1	-2.194	0.11	-0.148	0.517	0.767	0.569
YMR140W	SIP5	TFIID	TATA-less	1	-1.954	-0.294	-0.197	0.584	0.678	0.216
YMR099C	YMR099C	TFIID		1	-2.309	-0.331	-0.134	0.569	1.031	0.857
YDR410C	STE14	TFIID	TATA-containing	1	-2.26	0.065	0.515	0.801	0.519	-0.626
YJL172W	CPS1	TFIID	TATA-containing	1	-2.205	0.001	-0.039	0.877	0.863	-0.022
YJR123W	RPS5	TFIID	TATA-less	1	-3.223	0.157	0.348	0.373	0.512	0.455
YDL217C	TIM22	TFIID	TATA-less	1	-2.134	0.059	-0.157	0.803	0.504	-0.671
YGL244W	RTF1	TFIID	TATA-less	1	-1.968	-0.085	-0.089	0.561	0.446	-0.333
YBR106W	PHO88	TFIID	TATA-containing	1	-2.268	0.064	0.332	0.451	0.533	0.241
YGL115W	SNF4	TFIID	TATA-less	1	-1.969	-0.083	-0.071	0.389	0.552	0.505
YJR125C	ENT3	TFIID	TATA-less	1	-2.013	-0.006	0.085	0.871	0.887	0.027
YER057C	HMF1	TFIID	TATA-less	2	-3.614	0.158	1.258	0.432	0.944	1.129
YBR162W-A	YSY6	TFIID	TATA-less	2	-2.396	0.025	1.19	0.792	1.454	0.876
YGL101W	YGL101W	TFIID	TATA-containing	2	-1.631	-0.058	0.292	2.13	3.689	0.792
YNL158W	PGA1	TFIID	TATA-less	2	-1.814	-0.063	-0.02	0.591	0.361	-0.713
YDL130W	RPP1B	TFIID	TATA-less	2	-3.16	0.302	0.44	0.583	0.452	-0.367
YNL059C	ARP5	TFIID	TATA-less	2	-1.737	-0.165	0.117	1.055	1.513	0.521
YIL002W-A	YIL002W-A	TFIID		2	-2.225	-0.182	-0.286	0.711	0.678	-0.069
YML073C	RPL6A	TFIID	TATA-less	2	-2.899	0.112	0.166	0.625	0.576	-0.117
YMR197C	VTI1	TFIID	TATA-less	2	-1.879	-0.14	0.131	0.571	0.455	-0.327
YBR127C	VMA2	TFIID	TATA-less	2	-2.287	-0.044	-0.057	0.331	0.35	0.077
YHR042W	NCP1	TFIID	TATA-containing	2	-1.695	-0.194	0.007	0.781	1.08	0.467
YNL069C	RPL16B	TFIID	TATA-less	2	-2.77	0.099	0.214	0.603	0.576	-0.065
YDL140C	RPO21	TFIID		2	-1.927	-0.041	-0.068	0.383	0.291	-0.396
YNL157W	IGO1	TFIID	TATA-less	2	-1.758	-0.312	-0.137	0.675	0.732	0.118
YFL010C	WWM1	TFIID	TATA-less	2	-2.445	-0.021	0.54	0.696	0.586	-0.248
YHR064C	SSZ1	TFIID	TATA-less	2	-2.109	-0.133	-0.199	0.654	0.408	-0.679
YLR150W	STM1	TFIID	TATA-less	2	-3.178	-0.024	0.038	0.916	1.164	0.347
YGR032W	GSC2	TFIID		2	-1.899	0.033	-0.135	0.378	0.332	-0.185
YLR147C	SMD3	TFIID	TATA-less	2	-2.933	0.426	1.416	0.577	0.794	0.461
YDL137W	ARF2	TFIID		2	-2.281	-0.168	0.24	0.569	0.872	0.615
YDR150W	NUM1	TFIID		2	-1.956	-0.003	-0.07	0.64	0.77	0.266
YDR115W	YDR115W	TFIID	TATA-less	2	-2.35	0.134	0.276	0.939	0.384	-1.291
YML013W	UBX2	TFIID	TATA-less	2	-2.097	0.056	0.269	1.338	1.561	0.223
YDL053C	PBP4	TFIID	TATA-containing	2	-2.25	0.04	0.161	0.941	1.077	0.194
YHR026W	VMA16	TFIID	TATA-less	2	-1.981	-0.078	0.112	0.951	0.83	-0.197
YDR283C	GCN2	TFIID		2	-1.903	-0.1	-0.043	0.812	0.89	0.132
YOR386W	PHR1	TFIID		2	-2.013	0.18	0.3	0.847	1.074	0.342
YBR192W	RIM2	TFIID	TATA-less	2	-1.853	-0.202	-0.296	0.621	0.954	0.619
YIL129C	TAO3	TFIID	TATA-less	2	-1.748	0.129	-0.011	0.757	0.33	-1.197
YPL160W	CDC60	TFIID	TATA-less	2	-2.217	0.086	0.116	0.697	0.577	-0.273
YDR262W	YDR262W	TFIID	TATA-containing	2	-1.776	-0.187	0.229	0.786	0.853	0.118
YBR189W	RPS9B	TFIID	TATA-less	2	-2.828	0.215	0.273	0.452	0.374	-0.275
YDL175C	AIR2	TFIID	TATA-less	2	-2.092	-0.157	-0.215	0.939	0.756	-0.312
YGL197W	MDS3	TFIID	TATA-less	2	-1.946	0.093	0.062	1.073	0.87	-0.303
YOR151C	RPB2	TFIID	TATA-less	2	-1.816	-0.051	-0.077	0.499	0.57	0.194
YKL124W	SSH4	TFIID	TATA-less	2	-1.941	-0.289	0.002	1.298	1.697	0.387
YCL051W	LRE1	TFIID	TATA-less	2	-1.853	-0.191	0.044	0.666	0.281	-1.246
YLR199C	PBA1	TFIID		2	-2.238	0.307	-0.07	0.365	0.742	1.026
YJR067C	YAE1	TFIID		2	-2.632	-0.067	0.677	0.58	0.379	-0.614
YHR193C	EGD2	TFIID	TATA-less	2	-2.791	-0.07	0.224	0.4	0.314	-0.349
YLR206W	ENT2	TFIID	TATA-less	2	-2.08	0.141	0.152	1.23	0.627	-0.973
YOR349W	CIN1	TFIID	TATA-less	2	-2.101	-0.125	0.046	1.42	0.705	-1.01
YGR117C	YGR117C	TFIID	TATA-less	2	-1.759	-0.317	-0.104	0.426	0.352	-0.272
YLR038C	COX12	TFIID	TATA-less	2	-1.768	-0.154	0.254	1.805	0.851	-1.086
YHL002W	HSE1	TFIID	TATA-containing	2	-1.844	-0.461	-0.172	0.827	0.757	-0.128
YLR060W	FRS1	TFIID	TATA-less	2	-2.076	0.106	0.106	0.766	0.615	-0.317
YGL103W	RPL28	TFIID	TATA-less	2	-1.659	0.038	0.27	0.674	0.45	-0.583
YDR118W	APC4	TFIID	TATA-less	2	-2.224	-0.186	0.129	1.206	0.722	-0.74
YNL280C	ERG24	TFIID	TATA-less	2	-2.273	0.028	0.116	0.414	0.552	0.417
YOR195W	SLK19	TFIID	TATA-less	2	-1.706	-0.129	-0.222	0.659	1.307	0.988
YGR116W	SPT6	TFIID	TATA-less	2	-1.874	-0.076	-0.046	0.638	0.54	-0.241
YMR181C	YMR181C	CR	TATA-containing	2	-2.016	0.23	-0.059	0.636	1.576	1.309
YBR011C	IPP1	TFIID	TATA-less	2	-2.236	-0.242	0.255	0.45	0.27	-0.736
YOR265W	RBL2	TFIID	TATA-less	2	-1.92	-0.357	1.239	1.327	1.921	0.534
YPL031C	PHO85	TFIID	TATA-less	2	-2.463	-0.173	0.22	0.474	0.494	0.058
YBR238C	YBR238C	TFIID	TATA-less	2	-2.078	-0.179	0.119	1.103	0.82	-0.428
YCR033W	SNT1	TFIID	TATA-less	2	-1.873	-0.142	-0.002	0.796	0.844	0.085
YHR016C	YSC84	TFIID	TATA-less	2	-2.106	-0.213	0.002	0.449	0.938	1.062
YHL033C	RPL8A	TFIID	TATA-less	2	-1.656	0.019	0.054	0.298	0.305	0.035
YPL271W	ATP15	TFIID	TATA-less	2	-2.705	0.16	0.206	0.574	0.869	0.597
YIL041W	GVP36	TFIID	TATA-less	2	-2.101	-0.158	-0.095	0.44	0.433	-0.022
YPL240C	HSP82	CR	TATA-containing	2	-2.498	0.025	0.039	0.494	0.577	0.226
YGL123W	RPS2	TFIID	TATA-containing	2	-3.069	0.156	0.28	0.378	0.546	0.53
YAL030W	SNC1	TFIID		2	-2.369	-0.18	0.007	0.392	0.292	-0.426
YDR294C	DPL1	TFIID	TATA-containing	2	-1.854	-0.078	0.035	0.436	0.62	0.509
YKL029C	MAE1	TFIID	TATA-containing	2	-1.964	0.135	0.096	0.609	0.799	0.391
YDR253C	MET32	TFIID	TATA-less	2	-2.667	0.093	0.078	0.684	0.515	-0.409
YLR352W	YLR352W	TFIID	TATA-less	2	-1.894	-0.28	0.133	0.738	0.564	-0.388
YPR100W	MRPL51	TFIID	TATA-less	2	-2.404	-0.198	0.368	0.597	0.479	-0.319
YNL302C	RPS19B	TFIID	TATA-less	2	-3.034	0.109	0.206	0.54	0.375	-0.526
YDR384C	ATO3	TFIID	TATA-less	2	-2.39	0.18	-0.105	0.666	0.994	0.578
YMR183C	SSO2	TFIID	TATA-less	2	-1.308	-0.068	0.386	0.284	0.091	-1.642
YNL131W	TOM22	TFIID	TATA-less	2	-1.986	-0.038	0.21	0.427	1.013	1.247
YGR211W	ZPR1	TFIID	TATA-less	2	-2.27	0.009	-0.015	0.504	0.737	0.55
YLR388W	RPS29A	TFIID		2	-2.802	0.056	0.366	0.482	0.455	-0.085
YIL127C	RRT14	TFIID	TATA-less	2	-2.093	-0.227	0.18	0.343	0.541	0.657
YMR257C	PET111	TFIID	TATA-less	2	-1.696	-0.286	-0.19	1.365	0.754	-0.855
YGL173C	XRN1	TFIID	TATA-less	2	-1.906	0.019	-0.02	0.567	0.337	-0.751
YKL201C	MNN4	TFIID		2	-2.049	0.157	0.136	1.117	0.668	-0.742
YCR030C	SYP1	TFIID	TATA-less	2	-2.024	-0.06	0.102	1.005	1.153	0.198
YDR333C	RQC1	TFIID	TATA-less	2	-1.837	0.111	0.04	1.15	0.781	-0.558
YLR167W	RPS31	TFIID	TATA-less	2	-3.029	0.023	0.696	0.429	0.377	-0.186
YIL148W	RPL40A	TFIID	TATA-less	2	-2.85	-0.097	0.018	0.123	0.138	0.163
YOR096W	RPS7A	TFIID	TATA-containing	2	-2.876	0.067	0.141	0.848	0.932	0.137
YKR035W-A	DID2	TFIID	TATA-less	2	-1.923	-0.3	-0.182	0.568	0.366	-0.635
YFL034C-B	MOB2	TFIID	TATA-less	2	-1.945	-0.019	-0.093	1.353	1.874	0.47
YGL070C	RPB9	TFIID	TATA-less	2	-1.944	-0.051	0.243	0.454	0.396	-0.195
YMR184W	ADD37	TFIID	TATA-less	2	-2.444	-0.153	0.899	0.586	0.525	-0.158
YNL085W	MKT1	TFIID	TATA-less	2	-1.789	-0.052	0.019	0.743	0.605	-0.297
YBR133C	HSL7	TFIID	TATA-less	2	-2.068	0.012	-0.075	1.047	0.716	-0.547
YNR022C	MRPL50	TFIID	TATA-containing	2	-1.981	0.122	0.071	0.4	0.26	-0.624
YPR020W	ATP20	TFIID	TATA-less	2	-1.5	-0.404	0.304	0.761	0.878	0.207
YDR341C	YDR341C	TFIID	TATA-less	2	-2.525	-0.014	-0.126	0.829	0.804	-0.043
YKL007W	CAP1	TFIID	TATA-less	2	-1.635	-0.121	-0.299	0.364	0.631	0.793
YLR370C	ARC18	TFIID	TATA-less	2	-2.125	0.09	0.359	0.745	0.646	-0.205
YFR044C	DUG1	TFIID	TATA-less	2	-2.066	-0.173	-0.144	0.649	0.638	-0.024
YER129W	SAK1	TFIID		2	-2.094	0.226	0.14	0.72	0.562	-0.358
YER087C-B	SBH1	TFIID	TATA-less	2	-2.229	0.038	0.192	0.935	0.662	-0.498
YDL045W-A	MRP10	TFIID	TATA-containing	2	-2.344	-0.251	0.274	0.575	0.622	0.113
YDL064W	UBC9	TFIID		2	-2.207	0.053	-0.115	0.427	0.485	0.183
YPL273W	SAM4	TFIID	TATA-less	2	-2.293	-0.122	0.586	1.123	1.338	0.252
YFR052W	RPN12	TFIID	TATA-less	2	-1.855	-0.182	0.117	0.636	0.525	-0.277
YKL205W	LOS1	TFIID	TATA-less	2	-1.933	0.133	0.118	1.123	1.261	0.167
YBR211C	AME1	TFIID	TATA-less	2	-1.739	-0.296	-0.359	1.108	0.507	-1.128
YJR062C	NTA1	TFIID	TATA-less	2	-1.912	0.212	0.009	0.627	0.571	-0.135
YDR422C	SIP1	TFIID	TATA-less	2	-2.11	0.083	0.074	2.243	1.098	-1.03
YNL045W	LAP2	TFIID		2	-2.123	-0.051	0.28	1.167	2.57	1.139
YKL195W	MIA40	TFIID	TATA-less	2	-1.843	-0.196	-0.251	0.734	0.787	0.1
YER171W	RAD3	TFIID	TATA-containing	2	-2.207	0.12	0.23	0.418	0.39	-0.098
YDL211C	YDL211C	TFIID		2	-1.836	-0.519	-0.274	0.564	0.712	0.334
YOR259C	RPT4	TFIID	TATA-less	2	-2.06	-0.008	0.186	0.661	0.501	-0.401
YGR183C	QCR9	TFIID	TATA-less	2	-1.807	0.006	0.268	0.658	0.742	0.173
YBL072C	RPS8A	TFIID	TATA-less	2	-2.33	0.019	-0.19	1.118	0.374	-1.58
YNL156C	NSG2	TFIID	TATA-less	2	-2.007	0.223	0.128	0.985	0.738	-0.418
YOL040C	RPS15	TFIID	TATA-less	2	-3.26	0.27	0.722	0.588	0.637	0.115
YPL129W	TAF14	TFIID	TATA-less	2	-2.12	-0.044	0.226	0.495	0.383	-0.371
YDL159W	STE7	TFIID	TATA-less	2	-2.107	0.278	0.277	0.429	0.303	-0.503
YBL058W	SHP1	TFIID	TATA-containing	2	-1.873	0.085	0.054	0.53	0.306	-0.791
YPL215W	CBP3	TFIID	TATA-less	2	-2.235	0.146	0.246	0.844	1.129	0.42
YOR080W	DIA2	TFIID		2	-1.407	0.016	0.276	0.259	0.575	1.154
YPR141C	KAR3	TFIID	TATA-containing	2	-1.755	-0.259	-0.032	0.317	0.381	0.264
YLR246W	ERF2	TFIID		2	-1.967	-0.012	0.095	1.304	1.142	-0.191
YDR372C	VPS74	TFIID	TATA-less	2	-2.08	-0.143	-0.087	1.369	0.96	-0.512
YKL179C	COY1	TFIID	TATA-less	2	-1.933	-0.139	-0.076	0.241	0.403	0.743
YMR217W	GUA1	TFIID	TATA-containing	2	-2.527	0.178	0.121	0.429	0.403	-0.089
YGR188C	BUB1	TFIID	TATA-less	2	-2.102	-0.162	0.165	0.727	0.7	-0.054
YMR235C	RNA1	TFIID	TATA-less	2	-1.922	0.008	-0.297	0.53	0.598	0.172
YOR241W	MET7	TFIID		2	-2.029	-0.052	0.139	1.288	1.148	-0.167
YDR099W	BMH2	TFIID		2	-2.428	0.333	0.195	0.924	0.772	-0.26
YAL032C	PRP45	TFIID	TATA-less	2	-1.927	-0.046	-0.034	1.008	0.92	-0.133
YDR481C	PHO8	TFIID	TATA-containing	2	-1.976	-0.005	0.087	1.248	1.097	-0.187
YDL088C	ASM4	TFIID	TATA-less	2	-2.126	0.162	0.127	0.864	0.685	-0.336
YOL005C	RPB11	TFIID	TATA-less	2	-2.522	-0.024	0.221	1.051	0.692	-0.602
YLR438C-A	LSM3	TFIID		2	-1.647	-0.523	0.875	0.501	0.307	-0.704
YBR101C	FES1	TFIID	TATA-less	2	-2.228	0.027	-0.011	0.499	0.481	-0.054
YOL012C	HTZ1	TFIID	TATA-less	2	-2.29	-0.042	0.292	0.532	0.684	0.362
YIL093C	RSM25	TFIID	TATA-less	2	-2.228	-0.163	-0.203	0.152	0.477	1.651
YOR290C	SNF2	TFIID	TATA-less	2	-1.773	0.058	-0.032	0.532	0.685	0.365
YNL011C	YNL011C	TFIID	TATA-less	2	-2.498	0.047	0.062	1.021	0.784	-0.38
YPL131W	RPL5	TFIID	TATA-less	2	-2.774	-0.068	0.169	0.459	0.355	-0.37
YJL060W	BNA3	TFIID	TATA-containing	2	-1.95	-0.045	0.05	0.479	1.221	1.351
YOL145C	CTR9	TFIID	TATA-less	2	-1.82	-0.053	-0.01	0.494	0.327	-0.596
YOR014W	RTS1	TFIID	TATA-less	2	-2.022	0.037	0.016	0.772	0.326	-1.244
YOR244W	ESA1	TFIID	TATA-less	2	-2.034	-0.117	0.223	0.559	0.369	-0.598
YDR305C	HNT2	TFIID	TATA-less	2	-2.328	-0.475	0.333	0.487	0.483	-0.012
YGR205W	TDA10	TFIID	TATA-less	2	-1.932	-0.268	0.134	1.187	2.423	1.03
YGR232W	NAS6	TFIID	TATA-less	2	-1.876	-0.355	-0.317	0.595	0.652	0.131
YNR068C	YNR068C	TFIID		2	-2.921	0.086	-0.015	0.516	0.878	0.766
YBR052C	RFS1	TFIID	TATA-less	2	-2.183	-0.02	0.168	0.356	0.289	-0.303
YLR251W	SYM1	TFIID		2	-2.274	-0.081	0.23	0.554	1.354	1.29
YNL247W	YNL247W	TFIID	TATA-less	2	-2.12	-0.096	0.024	0.631	0.213	-1.564
YDL073W	YDL073W	TFIID	TATA-less	2	-1.766	-0.053	-0.021	0.62	0.425	-0.545
YGR231C	PHB2	TFIID	TATA-less	2	-2.271	0.085	0.089	0.823	0.846	0.041
YJL176C	SWI3	TFIID	TATA-less	2	-1.856	-0.057	0.01	0.944	0.654	-0.53
YBR135W	CKS1	TFIID	TATA-containing	2	-2.124	-0.256	0.373	1.849	2.107	0.188
YLR026C	SED5	TFIID		2	-2.085	-0.109	-0.041	0.334	0.484	0.535
YPR108W	RPN7	TFIID	TATA-less	2	-2.058	0.265	0.163	0.751	0.596	-0.334
YJR082C	EAF6	TFIID	TATA-less	2	-2.745	0.332	0.804	0.963	1.114	0.21
YOR354C	MSC6	TFIID	TATA-less	2	-1.915	-0.002	0.021	0.52	0.762	0.551
YLR205C	HMX1	TFIID	TATA-less	2	-1.705	-0.455	-0.302	0.99	0.813	-0.285
YPR072W	NOT5	TFIID	TATA-less	2	-1.924	0.098	0.113	0.37	0.774	1.063
YLR292C	SEC72	TFIID	TATA-less	2	-2.223	0.137	0.121	0.496	0.44	-0.174
YOR201C	MRM1	TFIID	TATA-less	2	-1.979	-0.021	-0.246	0.499	0.39	-0.356
YGL026C	TRP5	TFIID	TATA-less	2	-2.129	0.096	0.011	1.096	0.99	-0.147
YKL046C	DCW1	TFIID	TATA-less	2	-1.87	-0.155	-0.054	1.231	1.088	-0.178
YKL067W	YNK1	TFIID	TATA-containing	2	-2.404	0.069	0.193	0.473	0.424	-0.157
YDR293C	SSD1	TFIID	TATA-less	2	-1.996	-0.012	-0.144	1.174	0.92	-0.352
YIL036W	CST6	TFIID	TATA-less	2	-2.064	0.177	0.061	0.415	0.621	0.582
YNL138W	SRV2	TFIID	TATA-less	2	-1.935	0.06	0.134	0.901	0.758	-0.25
YFL018C	LPD1	TFIID	TATA-containing	2	-2.182	0.094	-0.041	0.498	0.378	-0.399
YBR091C	TIM12	TFIID	TATA-less	2	-2.347	0.202	0.118	0.958	0.979	0.032
YNL121C	TOM70	TFIID	TATA-less	2	-1.906	0.03	0.01	0.968	0.578	-0.742
YGR148C	RPL24B	TFIID	TATA-less	2	-3.087	-0.319	-0.115	1.001	0.873	-0.197
YPL037C	EGD1	TFIID	TATA-less	2	-2.735	-0.027	0.243	0.519	0.477	-0.121
YJL020C	BBC1	TFIID	TATA-less	2	-2.077	-0.028	-0.014	0.638	0.473	-0.429
YHR027C	RPN1	TFIID	TATA-less	2	-1.939	0.022	-0.025	0.446	0.52	0.22
YKR008W	RSC4	TFIID	TATA-less	2	-2.007	0.048	-0.018	0.981	0.804	-0.288
YBR156C	SLI15	TFIID	TATA-less	2	-1.817	0.087	0.207	0.73	1.881	1.365
YDL100C	GET3	TFIID	TATA-less	2	-1.995	-0.165	0.017	0.519	0.395	-0.394
YPR101W	SNT309	TFIID	TATA-containing	2	-2.014	0.062	-0.274	0.201	0.243	0.274
YPL125W	KAP120	TFIID	TATA-less	2	-2.106	-0.087	0.024	0.921	0.458	-1.007
YHR118C	ORC6	TFIID		2	-2	-0.073	0.103	0.242	0.409	0.755
YPL016W	SWI1	TFIID	TATA-less	2	-2.248	-0.312	-0.057	1.234	0.329	-1.906
YNR053C	NOG2	TFIID	TATA-containing	2	-1.887	-0.059	0.004	1.106	0.825	-0.423
YER030W	CHZ1	TFIID		2	-2.765	0.121	0.476	0.354	0.39	0.141
YPL159C	PET20	TFIID	TATA-less	2	-1.955	-0.239	0.186	0.896	0.909	0.02
YER074W	RPS24A	TFIID	TATA-less	2	-3.12	0.125	0.217	0.436	0.309	-0.499
YKL088W	CAB3	TFIID	TATA-less	2	-1.94	-0.092	-0.066	1.149	0.612	-0.908
YGR230W	BNS1	TFIID	TATA-less	2	-2.389	-0.156	0.221	0.347	0.305	-0.186
YGL071W	AFT1	TFIID	TATA-less	2	-1.441	0.033	0.047	0.511	0.603	0.24
YER122C	GLO3	TFIID	TATA-containing	2	-1.848	0.008	0.088	0.443	0.303	-0.548
YJR090C	GRR1	TFIID	TATA-less	2	-1.64	0.037	-0.058	0.525	0.507	-0.048
YAL035W	FUN12	TFIID	TATA-less	2	-2.184	0.069	0.198	0.674	0.818	0.281
YIL027C	EMC5	TFIID	TATA-less	2	-2.308	0.211	0.276	0.806	0.689	-0.226
YDR145W	TAF12	TFIID	TATA-less	2	-2.088	0.196	0.064	0.733	1.137	0.634
YBR172C	SMY2	TFIID	TATA-less	2	-2.088	0.08	0.173	0.696	1.132	0.703
YDR005C	MAF1	TFIID	TATA-less	2	-1.839	-0.023	0.07	0.581	0.572	-0.022
YDR472W	TRS31	TFIID	TATA-less	2	-1.046	0.073	-0.622	3.632	26.515	2.868
YLL045C	RPL8B	TFIID	TATA-less	2	-3.15	-0.11	-0.063	0.451	0.555	0.301
YJL177W	RPL17B	TFIID	TATA-less	2	-2.88	-0.001	0.013	0.978	0.847	-0.208
YGR084C	MRP13	TFIID	TATA-less	2	-1.703	-0.125	0.115	1.35	1.026	-0.396
YPR028W	YOP1	CR	TATA-less	2	-2.005	-0.024	0.259	0.511	0.631	0.305
YKL116C	PRR1	TFIID	TATA-less	2	-1.927	-0.183	0.016	0.467	0.505	0.114
YMR083W	ADH3	TFIID	TATA-containing	2	-2.493	0.193	0.369	0.664	0.587	-0.177
YJR085C	YJR085C	TFIID	TATA-less	2	-2.56	-0.31	0.356	0.673	0.494	-0.446
YGL076C	RPL7A	TFIID	TATA-less	2	-2.778	0.045	0.188	0.226	0.263	0.217
YDR485C	VPS72	TFIID		2	-2.238	-0.015	0.276	0.701	1.81	1.368
YPR062W	FCY1	TFIID	TATA-less	2	-2.851	0.077	0.325	0.437	0.351	-0.314
YIR010W	DSN1	TFIID	TATA-less	2	-1.95	0.142	0.098	0.521	0.761	0.548
YMR260C	TIF11	TFIID	TATA-less	2	-2.445	-0.158	0.011	0.678	0.748	0.142
YOR267C	HRK1	TFIID	TATA-containing	2	-2.571	-0.06	0.014	0.959	0.522	-0.878
YCR094W	CDC50	TFIID	TATA-less	2	-1.945	-0.132	0.051	0.95	0.719	-0.402
YJR092W	BUD4	TFIID	TATA-less	2	-1.806	0.006	0.025	0.48	0.32	-0.585
YMR214W	SCJ1	TFIID		2	-1.978	-0.221	-0.27	0.523	0.615	0.232
YKL020C	SPT23	TFIID	TATA-less	2	-1.798	0.038	0.097	0.449	0.508	0.18
YBL092W	RPL32	TFIID	TATA-less	2	-3.178	-0.036	0.064	0.485	0.473	-0.037
YDR130C	FIN1	TFIID	TATA-less	2	-2.083	0.049	-0.067	0.64	0.446	-0.521
YMR091C	NPL6	TFIID		2	-2.083	0.158	0.088	0.462	0.456	-0.02
YGR147C	NAT2	TFIID	TATA-less	2	-2.059	-0.013	0.24	0.482	0.59	0.29
YNL164C	IBD2	TFIID	TATA-less	2	-2.135	-0.099	-0.218	0.535	0.727	0.444
YGR186W	TFG1	TFIID	TATA-less	2	-1.775	-0.258	-0.025	0.904	0.767	-0.237
YDL082W	RPL13A	TFIID	TATA-less	2	-2.646	0.014	-0.114	0.425	0.424	-0.004
YER072W	VTC1	CR	TATA-less	2	-1.534	0.025	0.241	0.753	0.763	0.019
YGR005C	TFG2	TFIID		2	-2.079	-0.24	0.063	0.388	0.577	0.574
YGL187C	COX4	TFIID	TATA-less	2	-1.871	0.198	0.399	0.477	0.408	-0.224
YML069W	POB3	TFIID	TATA-less	2	-1.918	0.016	-0.012	0.451	0.364	-0.308
YNL084C	END3	TFIID	TATA-less	2	-1.965	-0.187	0.207	0.573	0.553	-0.049
YIL149C	MLP2	TFIID	TATA-less	2	-1.812	-0.002	-0.039	0.691	0.489	-0.497
YDL061C	RPS29B	TFIID	TATA-less	2	-2.755	-0.046	0.013	0.948	0.662	-0.518
YPR048W	TAH18	TFIID	TATA-less	2	-2.353	-0.166	0.016	1.077	0.6	-0.845
YEL013W	VAC8	TFIID	TATA-less	2	-2.167	0.165	0.205	0.839	0.739	-0.182
YLR325C	RPL38	TFIID	TATA-less	2	-3.424	0.102	0.571	0.503	0.68	0.436
YFL036W	RPO41	TFIID	TATA-less	2	-1.965	-0.01	0.069	0.645	0.244	-1.403
YIL038C	NOT3	TFIID	TATA-less	2	-2.13	-0.045	0.142	0.843	0.752	-0.166
YOR147W	MDM32	TFIID	TATA-less	2	-1.866	-0.068	-0.107	1.008	0.68	-0.569
YMR060C	SAM37	TFIID	TATA-less	2	-2.086	0.025	0.14	0.489	0.454	-0.105
YGL196W	DSD1	TFIID		2	-1.938	0.007	0.146	0.238	0.454	0.932
YOL073C	DSC2	TFIID		2	-2.122	-0.372	-0.014	0.462	0.317	-0.54
YFL037W	TUB2	TFIID	TATA-less	2	-2.302	-0.019	-0.048	0.873	1.506	0.787
YPR088C	SRP54	TFIID	TATA-less	2	-2.143	0.016	0.232	0.731	0.392	-0.9
YHR029C	YHI9	TFIID	TATA-less	2	-2.331	-0.533	0.544	0.502	0.537	0.099
YDR078C	SHU2	TFIID	TATA-less	2	-1.489	-0.16	0.509	0.395	0.063	-2.64
YPR132W	RPS23B	TFIID	TATA-less	2	-3.159	0.142	0.199	0.5	0.609	0.285
YDR377W	ATP17	TFIID	TATA-less	2	-1.901	0.048	0.039	0.69	0.337	-1.032
YOR122C	PFY1	TFIID	TATA-less	2	-2.267	-0.076	0.365	0.568	0.436	-0.382
YOR276W	CAF20	TFIID	TATA-less	2	-2.384	0.26	0.685	0.281	0.203	-0.469
YOR352W	TFB6	TFIID	TATA-less	2	-2.315	0.066	0.879	0.323	0.679	1.071
YJL149W	DAS1	TFIID	TATA-containing	2	-1.221	-0.109	0.817	0.089	0.018	-2.271
YKL104C	GFA1	TFIID	TATA-less	2	-2.005	0.072	0.081	0.786	1.36	0.791
YOL121C	RPS19A	TFIID	TATA-less	2	-2.636	-0.055	0.043	0.659	0.557	-0.244
YGR104C	SRB5	TFIID		2	-2.651	0.593	0.287	0.494	0.155	-1.675
YCL031C	RRP7	TFIID	TATA-less	2	-2.171	0.058	0.238	0.716	0.916	0.355
YBL069W	AST1	TFIID	TATA-containing	2	-2.654	0.175	0.421	0.837	0.776	-0.109
YMR192W	GYL1	TFIID	TATA-less	2	-2.277	0.183	0.176	0.616	0.634	0.041
YGL145W	TIP20	TFIID	TATA-containing	2	-2.033	0.022	-0.007	0.277	0.246	-0.172
YBL056W	PTC3	TFIID	TATA-less	2	-2.104	0.068	0.115	1.097	1.127	0.039
YNR036C	MRPS12	TFIID	TATA-less	2	-2.134	-0.167	-0.026	0.675	1.275	0.918
YML075C	HMG1	TFIID	TATA-less	2	-1.95	-0.031	0.106	0.525	0.532	0.018
YDR405W	MRP20	TFIID	TATA-less	2	-2.122	0.12	-0.296	0.506	0.528	0.064
YLR433C	CNA1	TFIID	TATA-containing	2	-1.679	0.063	0.29	0.21	0.047	-2.169
YDL160C-A	MHF2	TFIID	TATA-less	2	-2.322	-0.161	0.281	0.504	1.032	1.036
YEL044W	IES6	TFIID	TATA-less	2	-3.011	0.207	0.893	0.359	0.739	1.041
YML124C	TUB3	TFIID	TATA-less	2	-1.935	-0.004	0.161	1.189	1.83	0.622
YKL006W	RPL14A	TFIID	TATA-less	2	-2.892	-0.078	0.18	0.742	0.705	-0.074
YML036W	CGI121	TFIID	TATA-less	2	-2.294	-0.041	0.068	0.358	0.509	0.508
YER176W	ECM32	TFIID	TATA-less	2	-1.446	0.09	-0.673	0.226	0.087	-1.381
YPR043W	RPL43A	TFIID	TATA-less	2	-3.008	0.174	0.236	0.465	0.554	0.255
YOL133W	HRT1	TFIID		2	-1.883	-0.088	0.394	0.553	0.957	0.791
YMR229C	RRP5	TFIID	TATA-less	2	-2.066	-0.01	-0.079	1.026	0.711	-0.53
YNR028W	CPR8	TFIID		2	-1.727	-0.067	0.029	0.46	0.353	-0.381
YDR166C	SEC5	TFIID		2	-1.917	0.182	0.103	0.217	0.448	1.042
YIL070C	MAM33	TFIID	TATA-less	2	-1.87	-0.007	0.182	0.511	0.689	0.43
YIL128W	MET18	TFIID	TATA-less	2	-1.872	0.028	0.238	0.464	0.636	0.457
YPR165W	RHO1	TFIID	TATA-less	2	-2.206	0.049	0.239	0.472	0.376	-0.327
YEL022W	GEA2	TFIID	TATA-less	2	-1.839	-0.075	0.027	0.908	0.466	-0.961
YGR285C	ZUO1	TFIID	TATA-less	2	-2.391	0.04	0.032	0.388	0.347	-0.159
YHR201C	PPX1	TFIID	TATA-less	2	-1.964	-0.159	-0.129	0.242	0.258	0.093
YDR233C	RTN1	TFIID	TATA-containing	2	-2.133	-0.015	0.16	0.829	0.667	-0.313
YIL151C	ESL1	TFIID	TATA-less	2	-2.013	-0.063	-0.185	0.955	1.636	0.777
YDL238C	GUD1	TFIID		2	-2.087	0.06	-0.03	0.998	0.311	-1.682
YJL121C	RPE1	TFIID	TATA-less	2	-2.12	-0.491	0.001	0.59	0.506	-0.223
YMR109W	MYO5	TFIID	TATA-less	2	-1.995	-0.009	-0.105	0.354	0.473	0.418
YHR100C	GEP4	TFIID	TATA-less	2	-1.954	-0.422	0.256	0.52	0.443	-0.23
YPL040C	ISM1	TFIID	TATA-less	2	-2.093	-0.035	-0.353	0.774	0.451	-0.779
YOR292C	YOR292C	TFIID	TATA-less	2	-1.944	-0.183	0.292	0.321	0.462	0.528
YOL041C	NOP12	TFIID	TATA-less	2	-1.843	-0.148	-0.005	0.476	0.418	-0.187
YNR035C	ARC35	TFIID	TATA-less	2	-2.189	0.06	0.479	0.657	0.572	-0.2
YLR043C	TRX1	TFIID	TATA-less	2	-1.52	-0.979	1.798	0.648	4.922	2.926
YGL247W	BRR6	TFIID	TATA-less	2	-2.41	0.031	0.293	1.125	0.813	-0.468
YFR037C	RSC8	TFIID	TATA-less	2	-2.225	0.275	0.037	0.798	0.775	-0.043
YOR312C	RPL20B	TFIID	TATA-less	2	-3.03	0.152	0.094	0.348	0.258	-0.434
YCR009C	RVS161	TFIID	TATA-less	2	-2.409	0.078	0.129	0.406	0.233	-0.801
YJR105W	ADO1	TFIID	TATA-less	2	-2.571	-0.089	0.1	0.567	0.637	0.166
YHR077C	NMD2	TFIID		2	-2.031	-0.065	-0.102	0.627	0.425	-0.56
YLR420W	URA4	TFIID	TATA-containing	2	-2.077	-0.301	0.008	0.28	0.437	0.645
YIL031W	ULP2	TFIID	TATA-less	2	-1.939	-0.087	0.068	0.323	0.751	1.218
YLR185W	RPL37A	TFIID	TATA-less	2	-2.872	0.033	-0.02	0.635	0.666	0.069
YPR163C	TIF3	TFIID	TATA-less	2	-2.375	-0.079	-0.042	0.383	0.576	0.59
YNL097C	PHO23	TFIID		2	-1.636	-0.129	-0.154	0.234	0.171	-0.451
YGL220W	FRA2	TFIID		2	-2.145	-0.192	-0.458	0.356	0.722	1.02
YPL105C	SYH1	TFIID		2	-2.063	0.044	0.182	0.514	0.795	0.629
YGR071C	ENV11	TFIID		2	-2.131	0.105	0.13	0.64	0.331	-0.954
YDL188C	PPH22	TFIID	TATA-containing	2	-2.221	0.063	0.27	1.101	0.604	-0.867
YDR100W	TVP15	TFIID	TATA-less	2	-2.68	0.106	0.386	0.596	0.559	-0.092
YPR010C-A	YPR010C-A	TFIID	TATA-less	2	-2.341	-0.207	0.223	1.085	1.394	0.361
YNL268W	LYP1	TFIID	TATA-less	2	-1.974	0.239	-0.052	0.36	0.319	-0.177
YOL068C	HST1	TFIID	TATA-less	2	-2.016	0.059	0.044	1.914	2.045	0.095
YDR129C	SAC6	TFIID	TATA-less	2	-1.996	0.026	0.112	0.871	0.518	-0.75
YGL087C	MMS2	TFIID	TATA-less	2	-1.222	0.14	0.315	0.055	0.027	-1.014
YOR181W	LAS17	TFIID		2	-1.913	-0.083	-0.159	0.58	0.303	-0.937
YLR163C	MAS1	TFIID	TATA-less	2	-1.984	-0.11	0.025	0.559	0.752	0.427
YMR024W	MRPL3	TFIID	TATA-containing	2	-2.163	-0.09	0.377	0.954	0.843	-0.178
YJL183W	MNN11	TFIID	TATA-containing	2	-1.973	-0.124	0.12	0.99	0.768	-0.367
YKR067W	GPT2	TFIID	TATA-less	2	-2.21	0.126	-0.157	1.003	0.525	-0.933
YDR023W	SES1	TFIID	TATA-containing	2	-2.262	-0.063	0.124	0.48	0.455	-0.077
YNL070W	TOM7	TFIID	TATA-less	2	-2.087	-0.053	0.139	0.687	0.786	0.193
YBL031W	SHE1	TFIID	TATA-less	2	-1.124	-0.351	0.327	0.167	0.067	-1.319
YPL225W	YPL225W	TFIID	TATA-less	2	-2.301	0.2	0.104	0.506	0.431	-0.231
YPL259C	APM1	TFIID	TATA-less	2	-1.948	-0.141	0.024	0.449	0.69	0.619
YBR290W	BSD2	TFIID	TATA-containing	2	-2.423	0.117	0.299	0.752	0.58	-0.375
YER173W	RAD24	TFIID		2	-2.011	0.046	0.211	1.116	0.518	-1.107
YPR167C	MET16	TFIID	TATA-containing	2	-2.448	-0.165	-0.022	0.332	0.431	0.374
YCL044C	MGR1	TFIID	TATA-less	2	-2.095	0.072	0.11	0.97	1.951	1.008
YLR345W	YLR345W	TFIID		2	-1.996	-0.06	0.049	1.971	0.816	-1.273
YOR369C	RPS12	TFIID	TATA-containing	2	-2.748	0.22	0.345	0.38	0.337	-0.171
YOR085W	OST3	TFIID	TATA-less	2	-2.033	0	0.053	0.652	0.789	0.275
YBL027W	RPL19B	TFIID	TATA-less	2	-2.898	-0.157	-0.032	0.239	0.263	0.137
YBL061C	SKT5	TFIID	TATA-less	2	-2.23	0.027	0.114	0.459	0.517	0.172
YKL117W	SBA1	TFIID	TATA-less	2	-1.955	-0.187	-0.05	0.553	0.499	-0.15
YLR220W	CCC1	TFIID	TATA-containing	2	-2.209	-0.276	-0.003	0.542	0.188	-1.525
YPL179W	PPQ1	TFIID	TATA-less	2	-2.213	-0.093	0.204	1.134	0.757	-0.583
YBR084C-A	RPL19A	TFIID	TATA-less	2	-3.007	0.022	-0.038	0.358	0.367	0.036
YKL213C	DOA1	TFIID	TATA-less	2	-2.128	0.11	0.373	0.657	0.541	-0.28
YLR208W	SEC13	TFIID	TATA-less	2	-2.088	0.081	0.086	0.997	0.964	-0.047
YOR360C	PDE2	TFIID	TATA-less	2	-2.441	0.363	0.366	0.97	1.193	0.298
YFR010W	UBP6	TFIID	TATA-containing	2	-1.855	0.171	0.089	0.663	0.448	-0.566
YDL116W	NUP84	TFIID	TATA-less	2	-1.832	-0.048	-0.014	0.597	0.834	0.483
YOR209C	NPT1	TFIID	TATA-less	2	-2.241	0.002	-0.078	0.47	0.487	0.051
YBL066C	SEF1	TFIID		2	-1.72	-0.243	-0.252	2.47	2.348	-0.073
YBL022C	PIM1	TFIID		2	-1.867	0.035	0.019	1.049	0.943	-0.154
YOR239W	ABP140	TFIID		2	-2.252	0.015	-0.026	0.474	0.617	0.379
YAL031C	GIP4	TFIID	TATA-less	2	-2.033	-0.051	0.033	1.962	0.589	-1.736
YKR016W	MIC60	TFIID	TATA-less	2	-1.79	0.022	-0.083	0.377	0.533	0.5
YDL033C	SLM3	TFIID	TATA-less	2	-2.101	0.035	0.05	0.456	0.522	0.193
YDR025W	RPS11A	TFIID	TATA-less	2	-3.055	-0.072	0.215	0.564	0.477	-0.243
YPL143W	RPL33A	TFIID	TATA-less	2	-2.945	-0.074	0.066	0.448	0.336	-0.417
YIR022W	SEC11	TFIID	TATA-less	2	-2.461	-0.192	0.241	0.509	0.43	-0.245
YBR191W	RPL21A	TFIID	TATA-less	2	-2.949	0.111	0.158	0.416	0.368	-0.175
YPL085W	SEC16	TFIID	TATA-less	2	-1.961	0.003	0.04	0.431	0.618	0.519
YHR068W	DYS1	TFIID	TATA-less	2	-2.151	-0.2	-0.115	0.493	0.835	0.76
YOR034C	AKR2	TFIID	TATA-less	2	-2.165	0.094	0.084	1.196	1.366	0.192
YPR173C	VPS4	TFIID	TATA-less	2	-1.999	-0.035	-0.278	0.708	0.589	-0.264
YDL056W	MBP1	TFIID	TATA-less	2	-1.62	-0.099	0.441	0.207	0.076	-1.446
YDR351W	SBE2	TFIID	TATA-less	2	-1.969	-0.082	-0.075	0.437	0.668	0.61
YDR002W	YRB1	TFIID	TATA-less	2	-2.679	0.049	0.325	0.454	0.395	-0.201
YER043C	SAH1	CR	TATA-less	2	-2.044	-0.078	0.009	1.08	0.635	-0.766
YML085C	TUB1	TFIID	TATA-less	2	-2.397	0.208	0.198	0.537	0.952	0.827
YPR102C	RPL11A	TFIID	TATA-less	2	-2.595	-0.134	0.241	0.651	0.534	-0.285
YGL031C	RPL24A	TFIID		2	-3.17	0.029	-0.102	0.903	1.086	0.266
YBL105C	PKC1	TFIID	TATA-less	2	-1.908	-0.108	-0.076	0.712	0.362	-0.974
YLR275W	SMD2	TFIID	TATA-less	2	-2.258	-0.142	-0.22	0.656	0.586	-0.164
YMR227C	TAF7	TFIID	TATA-less	2	-2.4	-0.032	0.045	0.349	0.912	1.384
YER148W	SPT15	TFIID	TATA-less	2	-2.313	0.191	0.142	0.592	0.71	0.261
YOR219C	STE13	TFIID	TATA-less	2	-2.079	-0.146	-0.05	0.623	0.664	0.091
YPL241C	CIN2	TFIID	TATA-less	2	-1.227	-0.109	0.18	0.874	0.959	0.135
YJL059W	YHC3	TFIID	TATA-less	2	-2.361	0.063	0.257	0.814	0.712	-0.194
YGR173W	RBG2	TFIID	TATA-containing	2	-2.237	0.133	0.018	0.522	0.476	-0.133
YER126C	NSA2	TFIID	TATA-less	2	-2.61	-0.007	0.222	1.305	1.019	-0.357
YDL044C	MTF2	TFIID		2	-2.433	0.093	0.276	1.172	1.056	-0.15
YOR216C	RUD3	TFIID		2	-1.881	-0.055	-0.095	0.846	0.526	-0.686
YLR350W	ORM2	TFIID	TATA-containing	2	-1.699	0.132	-0.172	0.666	0.852	0.355
YKR057W	RPS21A	TFIID	TATA-less	2	-2.507	-0.186	0.212	0.463	0.495	0.097
YDR407C	TRS120	TFIID	TATA-containing	2	-1.65	-0.098	-0.015	1.626	0.713	-1.189
YKL176C	LST4	TFIID	TATA-less	2	-2.182	0.039	-0.053	0.426	0.257	-0.729
YOR076C	SKI7	TFIID	TATA-less	2	-1.966	0.01	-0.093	0.513	0.589	0.197
YDR027C	VPS54	TFIID	TATA-less	2	-1.759	-0.058	-0.206	1.244	1.102	-0.175
YDR462W	MRPL28	TFIID	TATA-less	2	-2.196	0.076	0.235	0.519	0.517	-0.006
YDR081C	PDC2	TFIID	TATA-less	2	-2.263	0.344	0.233	0.589	0.609	0.048
YNL310C	ZIM17	TFIID	TATA-less	2	-2.57	0.245	0.491	0.507	0.308	-0.719
YHR161C	YAP1801	TFIID	TATA-less	2	-2.487	0.094	0.248	0.882	1.002	0.184
YHR196W	UTP9	TFIID	TATA-less	2	-2.102	0.037	0.089	1.043	0.716	-0.543
YLR312W-A	MRPL15	TFIID	TATA-less	2	-2.06	-0.022	0.025	0.76	0.772	0.022
YDL203C	ACK1	TFIID	TATA-less	2	-2.05	-0.134	-0.22	0.936	0.907	-0.045
YNL076W	MKS1	TFIID	TATA-less	2	-2.051	-0.043	-0.187	0.352	0.672	0.934
YCR059C	YIH1	TFIID		2	-2.776	-0.175	-0.121	0.775	1.634	1.076
YDR152W	GIR2	TFIID	TATA-less	2	-2.21	0.227	0.186	0.43	0.263	-0.709
YML012W	ERV25	TFIID	TATA-less	2	-2.26	-0.069	0.38	0.816	0.544	-0.583
YHR163W	SOL3	TFIID	TATA-containing	2	-2.531	0.013	0.678	1.09	2.115	0.956
YDL097C	RPN6	TFIID	TATA-less	2	-2.069	0.019	0.015	0.722	0.525	-0.459
YGR083C	GCD2	TFIID	TATA-less	2	-1.961	-0.023	-0.121	0.998	0.842	-0.245
YJR083C	ACF4	TFIID		2	-1.841	-0.222	-0.196	0.749	0.345	-1.118
YHR103W	SBE22	TFIID	TATA-less	2	-2.189	0.138	0.107	0.89	0.853	-0.061
YLL023C	POM33	TFIID	TATA-less	2	-2.979	-0.181	0.648	0.324	0.442	0.446
YPR089W	YPR089W	TFIID		2	-1.842	-0.063	0.014	0.395	0.372	-0.086
YMR047C	NUP116	TFIID	TATA-less	2	-1.854	-0.023	0.018	0.652	0.544	-0.263
YNL259C	ATX1	TFIID	TATA-less	2	-2.854	-0.144	1.061	1.224	1.667	0.445
YER120W	SCS2	TFIID	TATA-less	2	-2.061	-0.315	0.059	0.751	0.645	-0.219
YNL071W	LAT1	TFIID	TATA-less	2	-2.516	0.099	0.028	0.822	0.765	-0.103
YBL017C	PEP1	TFIID	TATA-less	2	-2.038	0.066	-0.106	0.864	1.025	0.246
YIL078W	THS1	TFIID	TATA-less	2	-2.161	-0.126	-0.114	0.63	0.522	-0.271
YLR146W-A	YLR146W-A	TFIID		2	-2.883	0.725	1.35	0.851	0.929	0.127
YKL023W	YKL023W	TFIID		2	-2.083	-0.186	0.008	0.681	0.565	-0.27
YDR170C	SEC7	TFIID	TATA-less	2	-2.193	0.008	-0.041	0.677	0.351	-0.946
YDR299W	BFR2	TFIID	TATA-containing	2	-2.201	-0.002	0.249	0.5	0.664	0.408
YGL215W	CLG1	TFIID	TATA-less	2	-2.279	0.23	0.213	1.175	1.324	0.172
YBR279W	PAF1	TFIID	TATA-less	2	-2.114	0.113	-0.006	0.441	0.353	-0.324
YLR410W	VIP1	TFIID	TATA-less	2	-1.98	0.176	0.119	0.499	0.453	-0.14
YML024W	RPS17A	TFIID	TATA-less	2	-2.968	-0.07	-0.04	0.523	0.609	0.219
YLR387C	REH1	TFIID	TATA-less	2	-1.746	-0.057	0.024	0.336	0.187	-0.843
YCL045C	EMC1	TFIID	TATA-containing	2	-1.866	-0.071	-0.055	1.336	0.874	-0.611
YML062C	MFT1	TFIID	TATA-less	2	-2.375	0.239	0.047	0.186	0.142	-0.387
YPL209C	IPL1	TFIID	TATA-containing	2	-1.765	-0.367	-0.434	0.587	0.637	0.118
YIR037W	HYR1	TFIID	TATA-less	2	-2.486	-0.554	0.561	0.318	0.441	0.472
YHR074W	QNS1	TFIID	TATA-less	2	-2.027	0.016	-0.017	1.127	0.583	-0.949
YDR449C	UTP6	TFIID	TATA-less	2	-1.895	-0.229	-0.08	0.76	0.648	-0.23
YDL212W	SHR3	TFIID	TATA-containing	2	-1.955	-0.014	0.218	0.562	0.435	-0.372
YOL138C	RTC1	TFIID	TATA-containing	2	-2.051	-0.008	0.102	0.498	0.583	0.226
YKL080W	VMA5	TFIID	TATA-less	2	-2.002	-0.097	0.205	0.404	0.7	0.794
YOR157C	PUP1	TFIID	TATA-less	2	-2.068	0.019	0.033	0.55	0.623	0.181
YNL086W	SNN1	TFIID	TATA-less	2	-2.316	-0.067	0.39	0.765	2.366	1.629
YBL029C-A	YBL029C-A	TFIID	TATA-containing	2	-1.61	-0.745	-0.712	0.573	0.872	0.607
YER165W	PAB1	TFIID		2	-2.82	-0.056	-0.068	0.633	0.403	-0.651
YNL161W	CBK1	TFIID	TATA-less	2	-1.804	-0.072	0.01	0.616	0.431	-0.516
YHR194W	MDM31	TFIID	TATA-less	2	-1.864	-0.168	-0.248	1.324	0.95	-0.479
YGL010W	MPO1	TFIID	TATA-less	2	-1.018	-0.259	0.275	0.313	0.155	-1.014
YGL225W	VRG4	TFIID	TATA-containing	2	-1.779	0.046	0.008	0.757	0.542	-0.482
YBL091C	MAP2	TFIID		2	-2.051	-0.105	0.005	0.468	0.573	0.292
YDR231C	COX20	TFIID	TATA-less	2	-2.61	-0.269	0.051	0.881	0.62	-0.505
YHR059W	FYV4	TFIID		2	-2.438	-0.292	0.227	0.58	0.737	0.344
YOL016C	CMK2	TFIID	TATA-containing	2	-2.39	0.105	0.089	0.608	0.452	-0.429
YHR010W	RPL27A	TFIID	TATA-less	2	-2.856	0.079	0.098	0.762	0.646	-0.239
YJL111W	CCT7	TFIID	TATA-less	2	-1.878	0.108	-0.069	0.756	0.467	-0.695
YDL141W	BPL1	TFIID	TATA-less	2	-2.168	-0.008	0.102	0.293	0.192	-0.614
YGR102C	GTF1	TFIID	TATA-less	2	-2.329	-0.2	-0.083	0.433	0.255	-0.765
YPL243W	SRP68	TFIID	TATA-less	2	-1.931	0.023	0.074	0.509	0.372	-0.452
YDR488C	PAC11	TFIID	TATA-less	2	-2.038	0.007	-0.04	0.716	1.048	0.55
YNL209W	SSB2	TFIID	TATA-less	2	-2.747	0.032	0.112	0.566	0.896	0.664
YMR194W	RPL36A	TFIID	TATA-less	2	-2.776	0.155	0.288	0.544	0.573	0.074
YGR170W	PSD2	TFIID	TATA-containing	2	-1.918	0.027	-0.056	0.684	0.85	0.315
YGL107C	RMD9	TFIID	TATA-less	2	-1.965	0.132	0.242	0.678	0.469	-0.53
YBR188C	NTC20	TFIID		2	-2.754	0.249	-0.024	0.312	0.305	-0.031
YGL208W	SIP2	TFIID	TATA-less	2	-2.06	-0.235	1.317	0.812	5.334	2.715
YGL207W	SPT16	TFIID	TATA-less	2	-1.959	0.002	-0.034	0.602	0.286	-1.073
YLL010C	PSR1	TFIID	TATA-less	2	-2.079	0.042	0.081	1.286	0.606	-1.085
YEL020W-A	TIM9	TFIID	TATA-containing	2	-3.303	-0.303	1.107	0.551	0.513	-0.102
YDR429C	TIF35	TFIID	TATA-less	2	-2.154	0.037	0.22	0.728	0.697	-0.063
YIL105C	SLM1	TFIID		2	-1.863	-0.011	-0.067	0.857	0.359	-1.254
YER048W-A	ISD11	TFIID	TATA-less	2	-2.423	-0.203	0.444	0.642	0.537	-0.257
YOL036W	YOL036W	TFIID	TATA-less	2	-2.078	0.114	-0.009	0.617	1.958	1.666
YPL118W	MRP51	TFIID	TATA-less	2	-1.992	0.11	0.243	0.494	0.677	0.453
YDR518W	EUG1	TFIID	TATA-less	2	-1.959	-0.112	-0.012	1.172	2.899	1.307
YJL209W	CBP1	TFIID	TATA-less	2	-2.127	0.033	-0.111	0.959	0.83	-0.209
YDL134C	PPH21	TFIID		2	-1.95	0.071	0.125	1.086	0.751	-0.533
YHR012W	VPS29	TFIID	TATA-less	2	-2.214	-0.042	-0.411	0.499	0.636	0.348
YEL056W	HAT2	TFIID	TATA-less	2	-2.018	-0.051	0.049	0.911	0.74	-0.3
YKL180W	RPL17A	TFIID	TATA-less	2	-3.184	-0.063	0.23	0.586	0.551	-0.089
YJL189W	RPL39	TFIID	TATA-less	2	-2.876	0.049	0.271	0.426	0.459	0.108
YEL051W	VMA8	TFIID	TATA-less	2	-2.54	0.05	0.372	0.229	0.441	0.944
YDR087C	RRP1	TFIID	TATA-less	2	-2.549	0.122	-0.122	0.725	1.184	0.708
YDR028C	REG1	TFIID	TATA-less	2	-1.766	-0.156	-0.212	0.837	0.737	-0.183
YCR086W	CSM1	TFIID	TATA-less	2	-2.421	0.035	-0.259	0.457	0.457	0.002
YLL014W	EMC6	TFIID	TATA-less	2	-2.506	0.23	0.36	0.482	0.538	0.159
YLR082C	SRL2	TFIID	TATA-less	2	-2.141	-0.234	-0.07	0.796	0.651	-0.29
YPL050C	MNN9	TFIID	TATA-less	2	-2.24	-0.03	0.1	0.792	0.719	-0.14
YIL074C	SER33	TFIID		2	-2.116	-0.024	0.065	0.265	0.356	0.426
YIR023W	DAL81	TFIID	TATA-less	2	-1.657	-0.168	-0.208	0.747	0.457	-0.708
YPR083W	MDM36	TFIID	TATA-less	2	-2.482	-0.223	0.377	0.441	0.769	0.801
YKL206C	ADD66	TFIID	TATA-less	2	-2.37	0.127	0.174	0.485	0.327	-0.567
YJL002C	OST1	TFIID	TATA-less	2	-2.156	0.173	0.146	0.832	0.793	-0.069
YJL099W	CHS6	TFIID	TATA-less	2	-2.174	-0.36	0.052	0.91	1.582	0.797
YPL252C	YAH1	TFIID	TATA-containing	2	-2.156	-0.232	0.269	0.557	0.808	0.537
YMR160W	YMR160W	TFIID		2	-2.242	0.057	0.341	0.279	0.628	1.174
YDR122W	KIN1	TFIID		2	-1.992	0.099	-0.073	0.875	1.242	0.505
YER089C	PTC2	TFIID	TATA-less	2	-2.39	0.053	-0.048	0.326	0.361	0.149
YDL004W	ATP16	TFIID	TATA-less	2	-1.554	-0.143	0.441	0.514	0.196	-1.393
YGL048C	RPT6	TFIID	TATA-less	2	-2.131	-0.051	0.098	0.522	0.454	-0.2
YGR072W	UPF3	TFIID	TATA-less	2	-2.635	0.192	0.308	0.565	0.887	0.652
YDR477W	SNF1	TFIID	TATA-less	2	-1.972	0.016	0.142	0.681	0.615	-0.149
YLR192C	HCR1	TFIID	TATA-less	2	-2.449	-0.104	0.227	0.875	0.949	0.117
YMR209C	YMR209C	TFIID		2	-2.342	0.007	0.237	0.433	0.557	0.364
YKL154W	SRP102	TFIID		2	-2.048	-0.353	-0.214	0.743	0.537	-0.469
YML063W	RPS1B	TFIID	TATA-less	2	-2.92	-0.178	0.114	0.566	0.451	-0.326
YOL139C	CDC33	TFIID	TATA-less	2	-2.604	0.291	0.189	0.697	0.93	0.416
YDL173W	PAR32	TFIID	TATA-less	2	-2.204	-0.059	0.173	1.252	2.193	0.809
YDR356W	SPC110	TFIID		2	-1.978	0.186	0.077	0.709	0.772	0.124
YLR314C	CDC3	TFIID	TATA-less	2	-2.186	-0.038	0.061	1.101	0.696	-0.662
YGL044C	RNA15	TFIID	TATA-less	2	-1.921	0.173	-0.15	0.711	0.429	-0.728
YJR134C	SGM1	TFIID	TATA-less	2	-2.206	0.154	0.28	0.998	0.831	-0.263
YKR014C	YPT52	TFIID	TATA-less	2	-2.096	0.027	0.866	1.326	0.574	-1.209
YPR055W	SEC8	TFIID	TATA-less	2	-1.779	0.103	-0.027	1.156	1.041	-0.152
YAL041W	CDC24	TFIID	TATA-less	2	-1.941	0.149	0.305	0.583	0.189	-1.623
YEL031W	SPF1	TFIID	TATA-less	2	-1.778	-0.085	-0.107	0.7	0.713	0.026
YDR500C	RPL37B	TFIID	TATA-less	2	-2.878	-0.077	-0.281	0.468	0.401	-0.224
YOR141C	ARP8	TFIID	TATA-less	2	-2.023	-0.072	0.046	0.607	0.771	0.345
YJR117W	STE24	TFIID	TATA-less	2	-2.274	0.066	0.087	0.474	0.518	0.126
YER103W	SSA4	TFIID	TATA-less	2	-2.53	0.224	-0.282	0.427	0.24	-0.829
YOR320C	GNT1	TFIID	TATA-less	2	-1.734	-0.174	-0.094	0.762	0.411	-0.889
YML060W	OGG1	TFIID		2	-1.983	-0.297	-0.084	0.461	0.984	1.094
YDL190C	UFD2	TFIID	TATA-less	2	-1.812	0.052	-0.002	0.426	0.312	-0.447
YLR441C	RPS1A	TFIID	TATA-less	2	-2.804	-0.074	-0.039	0.538	0.704	0.386
YLR216C	CPR6	TFIID	TATA-less	2	-2.421	-0.094	0.067	0.726	0.909	0.323
YDL143W	CCT4	TFIID	TATA-less	2	-2.045	0.053	0.107	0.855	0.63	-0.44
YOL001W	PHO80	TFIID		2	-2.396	-0.098	-0.068	0.788	0.542	-0.54
YDR196C	CAB5	TFIID	TATA-less	2	-2.299	0.359	0.045	0.387	0.523	0.433
YBR121C	GRS1	TFIID	TATA-less	2	-2.281	-0.025	-0.153	0.466	0.39	-0.255
YDL226C	GCS1	TFIID	TATA-less	2	-2.024	-0.032	0.175	0.588	1.006	0.775
YFR050C	PRE4	TFIID	TATA-less	2	-1.933	-0.07	0.073	0.689	0.741	0.104
YCL028W	RNQ1	TFIID		2	-2.137	-0.334	-0.084	0.388	0.678	0.804
YIL075C	RPN2	TFIID	TATA-less	2	-2.066	0.144	0.168	0.403	0.478	0.248
YFR031C-A	RPL2A	TFIID	TATA-less	2	-3.173	0.131	0.14	0.766	0.975	0.348
YJL097W	PHS1	TFIID	TATA-less	2	-2.811	0.224	0.996	0.539	1.108	1.041
YOR167C	RPS28A	TFIID	TATA-less	2	-2.923	-0.147	0.625	0.673	0.744	0.144
YLR310C	CDC25	TFIID	TATA-less	2	-1.946	0.014	-0.168	0.799	0.345	-1.21
YPR085C	ASA1	TFIID		2	-2.164	-0.02	-0.033	0.533	0.639	0.262
YDR494W	RSM28	TFIID	TATA-less	2	-2.186	-0.092	-0.309	0.444	0.48	0.113
YMR001C	CDC5	TFIID	TATA-less	2	-1.751	0.011	0.09	0.749	0.457	-0.712
YPL137C	GIP3	TFIID	TATA-less	2	-2.282	0.064	0.168	0.435	0.812	0.9
YDR003W	RCR2	TFIID	TATA-less	2	-2.633	-0.417	0.331	0.244	0.239	-0.034
YEL017W	GTT3	TFIID	TATA-less	2	-2.435	0.247	0.282	0.575	0.591	0.039
YNL197C	WHI3	TFIID	TATA-less	2	-2.08	0.039	0.115	0.603	0.495	-0.284
YEL063C	CAN1	TFIID	TATA-less	2	-1.965	0.08	0.131	1.139	0.677	-0.751
YDL012C	YDL012C	TFIID	TATA-containing	2	-2.266	-0.018	-0.064	0.556	0.609	0.132
YGL014W	PUF4	TFIID	TATA-less	2	-2.047	-0.095	-0.055	0.621	0.407	-0.61
YPR033C	HTS1	TFIID	TATA-less	2	-2.297	0.116	-0.183	1.348	1.446	0.101
YBR234C	ARC40	TFIID	TATA-less	2	-1.642	-0.609	0.067	0.489	0.531	0.119
YDR424C	DYN2	TFIID	TATA-less	2	-2.451	0.326	1.057	0.427	0.474	0.153
YFR051C	RET2	TFIID	TATA-less	2	-2.188	0.132	0.112	0.6	0.58	-0.047
YDR456W	NHX1	TFIID	TATA-less	2	-2.268	0.305	0.085	1.411	0.65	-1.119
YGL226C-A	OST5	TFIID		2	-2.393	-0.325	0.393	0.549	0.642	0.227
YCR077C	PAT1	TFIID	TATA-less	2	-2.051	-0.111	-0.038	1.152	0.745	-0.628
YBR164C	ARL1	TFIID	TATA-containing	2	-2.08	-0.103	0.319	0.351	0.388	0.145
YOL038W	PRE6	TFIID	TATA-less	2	-1.952	0.048	0.071	0.673	0.535	-0.331
YFL013C	IES1	TFIID	TATA-less	2	-1.946	-0.083	-0.035	0.783	0.568	-0.463
YHR141C	RPL42B	TFIID	TATA-less	2	-2.652	0.003	0.049	0.437	0.267	-0.713
YGR007W	ECT1	TFIID	TATA-less	2	-1.976	-0.033	-0.014	1.229	0.66	-0.896
YLR099C	ICT1	TFIID	TATA-containing	2	-1.962	-0.052	0.029	1.845	1.925	0.062
YFL022C	FRS2	TFIID	TATA-less	2	-2.194	-0.167	0.038	0.669	0.435	-0.621
YOR220W	RCN2	TFIID	TATA-less	2	-2.359	0.138	0.2	0.872	0.301	-1.536
YBR282W	MRPL27	TFIID	TATA-less	2	-2.422	0.467	0.46	0.432	0.358	-0.269
YNL272C	SEC2	TFIID	TATA-less	2	-2.011	0.047	0.06	0.959	1.122	0.227
YGR038W	ORM1	TFIID	TATA-less	2	-2.373	-0.008	0.235	0.985	0.537	-0.874
YGL234W	ADE5,7	TFIID	TATA-less	2	-2.175	-0.085	-0.062	1.487	1.185	-0.328
YMR188C	MRPS17	TFIID	TATA-less	2	-1.996	-0.006	0.01	0.756	0.452	-0.741
YLR116W	MSL5	TFIID	TATA-less	2	-2.406	0.123	0.327	0.914	0.577	-0.664
YGR078C	PAC10	TFIID	TATA-less	2	-2.608	-0.111	0.01	0.526	0.669	0.347
YDL192W	ARF1	TFIID	TATA-less	2	-2.4	0.007	0.26	0.721	0.931	0.368
YKL069W	YKL069W	TFIID		2	-2.433	-0.476	0.074	0.282	0.426	0.596
YPL028W	ERG10	TFIID	TATA-containing	2	-1.773	-0.173	0.07	0.556	0.448	-0.31
YDL092W	SRP14	TFIID	TATA-less	2	-1.874	-0.312	0.03	0.467	0.208	-1.165
YLR332W	MID2	TFIID	TATA-less	2	-2.111	0.152	0.239	0.743	0.66	-0.171
YLR052W	IES3	TFIID	TATA-less	2	-2.398	0.171	0.328	0.591	0.727	0.3
YOR362C	PRE10	TFIID	TATA-less	2	-2.171	0.051	0.111	0.561	0.392	-0.515
YOR118W	RTC5	TFIID	TATA-less	2	-2.192	-0.415	-0.168	0.682	1.287	0.916
YDR190C	RVB1	TFIID	TATA-less	2	-2.04	-0.094	-0.036	0.634	0.773	0.286
YMR073C	IRC21	TFIID	TATA-less	2	-2.551	0.166	0.392	0.254	0.462	0.864
YIL135C	VHS2	TFIID	TATA-less	2	-1.911	-0.134	0.03	1.31	0.887	-0.562
YLR095C	IOC2	TFIID	TATA-less	2	-2.032	0.064	0.101	0.657	0.976	0.572
YLR223C	IFH1	TFIID	TATA-less	2	-2.172	0.102	0.005	0.461	0.4	-0.204
YDL195W	SEC31	TFIID		2	-2.014	0.122	0.028	1.019	0.941	-0.115
YMR198W	CIK1	TFIID	TATA-less	2	-1.712	-0.265	-0.106	0.411	0.408	-0.011
YHR154W	RTT107	TFIID	TATA-less	2	-1.783	-0.128	0.171	0.988	1.031	0.061
YGL219C	MDM34	TFIID	TATA-containing	2	-1.932	0.066	-0.353	0.215	0.354	0.718
YPL235W	RVB2	TFIID	TATA-less	2	-2.373	0.186	0.562	0.568	0.595	0.066
YFL005W	SEC4	TFIID	TATA-less	2	-1.946	0.095	0.203	0.4	0.539	0.429
YOR086C	TCB1	TFIID	TATA-less	2	-1.998	-0.066	-0.173	0.239	0.209	-0.194
YGR020C	VMA7	TFIID		2	-2.628	0.045	-0.015	0.4	0.236	-0.759
YGR092W	DBF2	TFIID	TATA-less	2	-1.785	0.085	0.175	0.568	0.381	-0.575
YDR113C	PDS1	TFIID	TATA-less	2	-2.437	-0.034	0.067	0.257	0.488	0.924
YMR171C	EAR1	TFIID	TATA-less	2	-1.87	-0.093	-0.139	0.649	0.419	-0.633
YJL061W	NUP82	TFIID	TATA-less	2	-1.898	-0.03	0.006	0.805	0.324	-1.315
YGR132C	PHB1	TFIID	TATA-containing	2	-2.264	0.228	0.405	0.659	0.71	0.108
YDR289C	RTT103	TFIID		2	-2.094	0.043	0.074	0.397	0.2	-0.991
YLL043W	FPS1	TFIID	TATA-less	2	-2.092	-0.165	-0.194	0.88	0.963	0.13
YHR090C	YNG2	TFIID	TATA-less	2	-1.902	0.141	-0.349	0.912	0.542	-0.749
YBR198C	TAF5	TFIID	TATA-less	2	-1.56	0.046	0.104	0.347	0.273	-0.345
YJL008C	CCT8	TFIID	TATA-less	2	-1.986	-0.149	-0.023	0.626	0.538	-0.219
YNL297C	MON2	TFIID	TATA-less	2	-1.794	-0.157	-0.043	1.455	0.607	-1.26
YNL287W	SEC21	TFIID	TATA-less	2	-1.97	0.109	0.195	0.783	0.782	-0.002
YGL043W	DST1	TFIID	TATA-less	2	-1.83	-0.085	-0.146	0.462	0.319	-0.531
YNL218W	MGS1	TFIID	TATA-less	2	-2.505	-0.153	0	2.748	1.021	-1.429
YBL091C-A	SCS22	TFIID	TATA-containing	2	-2.862	-0.028	0.631	0.411	0.28	-0.557
YLR058C	SHM2	TFIID	TATA-containing	2	-1.844	-0.169	-0.274	0.709	0.619	-0.196
YJL124C	LSM1	TFIID	TATA-less	2	-2.179	0.057	0.443	0.905	0.908	0.005
YDR244W	PEX5	TFIID	TATA-containing	2	-2.289	-0.08	0.183	0.694	0.798	0.201
YOR231W	MKK1	TFIID	TATA-less	2	-1.982	-0.267	-0.01	2.528	1.309	-0.95
YDR510W	SMT3	TFIID	TATA-less	2	-2.487	0.226	0.611	0.645	0.779	0.272
YML081W	TDA9	TFIID	TATA-less	2	-1.89	-0.137	-0.131	0.796	0.655	-0.28
YDR382W	RPP2B	TFIID	TATA-less	2	-2.984	0.139	0.56	0.517	0.445	-0.215
YDL105W	NSE4	TFIID	TATA-less	2	-2.538	-0.218	-0.261	0.328	0.582	0.829
YDR314C	RAD34	TFIID	TATA-less	2	-1.966	-0.394	-0.208	0.207	0.178	-0.214
YNR024W	MPP6	TFIID	TATA-less	2	-2.531	-0.365	0.197	0.307	1.26	2.035
YOR123C	LEO1	TFIID	TATA-less	2	-1.833	-0.151	-0.322	0.497	0.367	-0.435
YMR005W	TAF4	TFIID	TATA-less	2	-1.737	-0.383	-0.323	0.411	0.508	0.308
YGL147C	RPL9A	TFIID		2	-3.087	-0.093	0.272	0.718	0.706	-0.025
YBR255W	MTC4	TFIID		2	-2.331	-0.055	0.243	0.539	0.532	-0.017
YBR251W	MRPS5	TFIID	TATA-less	2	-2.324	0.132	0.081	0.399	0.391	-0.031
YNL152W	INN1	TFIID	TATA-less	2	-2.371	0.22	0.224	0.52	1.282	1.303
YMR282C	AEP2	TFIID	TATA-less	2	-2.09	-0.24	0.068	0.768	0.711	-0.112
YNL189W	SRP1	TFIID		2	-1.914	-0.066	-0.142	0.613	0.613	0
YOR027W	STI1	CR	TATA-containing	2	-2.704	-0.133	-0.017	0.575	1.604	1.479
YIR006C	PAN1	TFIID	TATA-less	2	-2.173	-0.015	-0.123	0.453	0.683	0.591
YBL060W	YEL1	TFIID		2	-1.971	-0.343	-0.384	0.584	0.935	0.679
YDL028C	MPS1	TFIID	TATA-less	2	-1.866	-0.114	-0.085	0.543	0.604	0.154
YML103C	NUP188	TFIID	TATA-less	2	-1.883	0.011	-0.008	0.937	1.652	0.819
YGR105W	VMA21	TFIID	TATA-less	2	-2.154	-0.729	0.325	0.267	0.377	0.5
YKL145W	RPT1	TFIID	TATA-less	2	-2.379	0.178	0.207	0.881	0.621	-0.505
YKR082W	NUP133	TFIID	TATA-less	2	-1.823	-0.03	0.034	0.815	1.367	0.746
YGR267C	FOL2	TFIID	TATA-less	2	-2.236	-0.062	0.068	0.491	0.537	0.129
YLR094C	GIS3	TFIID	TATA-less	2	-2.228	0.065	0.054	0.534	0.584	0.13
YML031W	NDC1	TFIID	TATA-less	2	-1.586	-0.277	-0.139	0.457	0.528	0.208
YGR076C	MRPL25	TFIID	TATA-less	2	-2.209	-0.062	0.224	0.741	0.882	0.251
YHR101C	BIG1	TFIID	TATA-less	2	-2.038	-0.492	-0.105	1.802	1.264	-0.511
YJR086W	STE18	TFIID	TATA-less	2	-2.063	-0.437	0.131	0.462	0.358	-0.369
YFR002W	NIC96	TFIID	TATA-less	2	-1.909	-0.042	0.047	0.677	0.444	-0.608
YMR143W	RPS16A	TFIID	TATA-less	2	-2.875	0.282	0.176	0.385	0.365	-0.077
YGL137W	SEC27	TFIID	TATA-less	2	-1.979	-0.106	-0.054	1.004	0.748	-0.424
YBL059W	YBL059W	TFIID	TATA-less	2	-2.875	-0.035	0.472	0.612	1.009	0.722
YOL120C	RPL18A	TFIID	TATA-less	2	-2.996	0.106	0.289	0.461	0.452	-0.027
YJR145C	RPS4A	TFIID	TATA-less	2	-3.003	-0.012	-0.036	0.49	0.489	-0.003
YEL002C	WBP1	TFIID	TATA-less	2	-2.055	0.222	0.031	0.85	0.659	-0.368
YNR021W	YNR021W	TFIID	TATA-less	2	-2.02	-0.046	0.028	0.466	0.503	0.111
YPR137W	RRP9	TFIID	TATA-less	2	-2.254	-0.062	-0.058	0.596	0.722	0.277
YJL203W	PRP21	TFIID	TATA-less	2	-2.488	0.112	0.238	0.434	0.187	-1.216
YGR063C	SPT4	TFIID	TATA-less	2	-1.991	-0.637	0.017	0.869	1.161	0.419
YOR373W	NUD1	TFIID	TATA-less	2	-1.71	-0.198	-0.217	0.586	0.422	-0.473
YER105C	NUP157	TFIID	TATA-containing	2	-1.912	0.016	0.03	0.498	0.705	0.5
YER026C	CHO1	CR	TATA-containing	2	-2.006	0.199	0.244	0.714	0.678	-0.076
YDL136W	RPL35B	TFIID	TATA-less	2	-2.77	-0.042	0.158	0.241	0.233	-0.048
YAR027W	UIP3	TFIID		2	-2.636	0.192	0.524	0.382	0.26	-0.553
YKL211C	TRP3	TFIID	TATA-less	2	-1.892	-0.236	-0.012	1.018	0.899	-0.179
YNL016W	PUB1	TFIID		2	-2.684	-0.028	0.207	1.041	0.585	-0.83
YJL117W	PHO86	TFIID	TATA-less	2	-2.348	0.033	0.166	1.026	0.977	-0.07
YNL010W	YNL010W	TFIID	TATA-less	2	-2.8	-0.223	0.475	0.659	0.488	-0.434
YIL077C	YIL077C	TFIID	TATA-less	2	-2.277	-0.336	-0.01	0.844	0.661	-0.353
YDR249C	YDR249C	TFIID	TATA-less	2	-2.537	0.295	0.22	0.384	0.028	-3.785
YOR294W	RRS1	TFIID	TATA-less	2	-2.539	0.105	0.254	0.602	0.517	-0.219
YLR048W	RPS0B	TFIID	TATA-less	2	-2.974	0.079	0.023	1.076	0.936	-0.201
YDR172W	SUP35	TFIID	TATA-less	2	-2.28	0.061	0.066	1.422	1.007	-0.498
YBR289W	SNF5	TFIID	TATA-less	2	-1.804	0.052	-0.15	0.822	0.532	-0.626
YNL236W	SIN4	TFIID	TATA-less	2	-2.104	0.182	0.075	0.532	0.88	0.726
YAL016W	TPD3	TFIID		2	-1.783	-0.113	-0.078	0.604	0.836	0.469
YJR144W	MGM101	TFIID	TATA-less	2	-1.91	-0.424	-0.277	0.932	0.343	-1.442
YCL024W	KCC4	TFIID	TATA-less	2	-2.017	0.035	-0.072	0.632	0.943	0.576
YML106W	URA5	TFIID	TATA-less	2	-2.458	0.214	0.144	0.335	0.37	0.146
YLR309C	IMH1	TFIID	TATA-less	2	-2.042	0.142	0.021	1.215	0.821	-0.565
YBL040C	ERD2	TFIID	TATA-less	2	-2.143	-0.01	0.359	0.574	0.381	-0.591
YOR323C	PRO2	TFIID	TATA-less	2	-2.541	0.399	0.588	0.348	0.478	0.46
YDL091C	UBX3	TFIID	TATA-less	2	-2.421	0.195	0.543	0.478	0.375	-0.351
YOR051C	ETT1	TFIID	TATA-less	2	-2.269	0.176	-0.101	0.169	0.188	0.154
YML110C	COQ5	TFIID	TATA-less	2	-2.25	0.163	-0.262	0.426	0.398	-0.099
YML079W	YML079W	TFIID	TATA-less	2	-3.148	0.031	0.981	0.74	1.085	0.552
YLR371W	ROM2	TFIID	TATA-less	2	-1.989	0.032	0.063	0.568	0.527	-0.107
YNR023W	SNF12	TFIID	TATA-less	2	-2.151	-0.049	0.045	0.5	1.024	1.034
YDR389W	SAC7	TFIID		2	-1.475	-0.127	-0.294	0.955	0.894	-0.095
YOR322C	LDB19	TFIID	TATA-less	2	-1.947	0.114	0.065	0.711	1.401	0.977
YKR028W	SAP190	TFIID	TATA-less	2	-2.064	0.169	0.106	0.494	0.506	0.034
YOR099W	KTR1	TFIID	TATA-less	2	-2.19	-0.085	-0.084	1.244	1.592	0.356
YNL130C	CPT1	CR	TATA-less	2	-2.072	-0.203	-0.039	0.547	0.145	-1.917
YOL149W	DCP1	TFIID	TATA-less	2	-2.435	-0.085	0.327	0.631	3.192	2.338
YLL040C	VPS13	TFIID	TATA-less	2	-1.987	0.034	-0.065	0.781	0.688	-0.184
YOL049W	GSH2	TFIID	TATA-less	2	-2.282	0.081	0.414	0.449	0.679	0.598
YDL072C	YET3	TFIID	TATA-containing	2	-2.105	0.269	0.558	0.745	0.75	0.009
YKL064W	MNR2	TFIID	TATA-less	2	-2.208	0.16	0.125	0.906	0.888	-0.028
YER102W	RPS8B	TFIID	TATA-less	2	-2.952	0.14	0	1.199	1.13	-0.085
YCR051W	YCR051W	TFIID	TATA-less	2	-2.459	-0.122	0.461	0.513	0.341	-0.59
YLR389C	STE23	TFIID	TATA-less	2	-1.304	-0.112	-0.199	0.137	0.043	-1.684
YKL193C	SDS22	TFIID	TATA-less	2	-1.996	0.067	0.001	0.967	0.54	-0.84
YNL159C	ASI2	TFIID	TATA-less	2	-1.945	0.083	0.168	0.495	0.671	0.438
YHL015W	RPS20	TFIID	TATA-less	2	-3.045	-0.038	0.228	0.658	0.662	0.008
YKR043C	SHB17	TFIID	TATA-less	2	-1.306	-0.393	0.243	0.237	0.103	-1.209
YDR108W	TRS85	TFIID		2	-2.217	-0.04	-0.302	0.95	0.7	-0.439
YDR357C	CNL1	TFIID	TATA-less	2	-2.44	-0.142	0.184	0.425	0.594	0.481
YMR203W	TOM40	TFIID	TATA-less	2	-1.969	-0.023	0.15	0.473	0.663	0.485
YOR097C	YOR097C	TFIID		2	-2.473	0.105	0.249	0.569	0.654	0.201
YIL043C	CBR1	TFIID	TATA-containing	2	-2.284	0.015	0.203	0.603	0.814	0.432
YJL001W	PRE3	TFIID	TATA-less	2	-2.297	-0.101	0.116	0.43	0.343	-0.328
YJL102W	MEF2	TFIID	TATA-less	2	-1.401	-0.409	0.293	0.494	0.221	-1.158
YHL027W	RIM101	TFIID	TATA-less	2	-2.279	0.24	-0.129	0.447	0.839	0.908
YPL218W	SAR1	TFIID	TATA-less	2	-2.411	0.205	0.38	0.408	0.343	-0.248
YLR103C	CDC45	TFIID	TATA-less	2	-2.42	0.188	0.258	0.635	1.363	1.102
YOR347C	PYK2	TFIID		2	-2.239	-0.322	-0.221	0.371	0.237	-0.647
YKL157W	APE2	TFIID		2	-2.237	0.106	0.058	0.429	0.661	0.623
YBR049C	REB1	TFIID	TATA-less	2	-1.998	-0.01	-0.096	0.45	0.933	1.05
YLR006C	SSK1	TFIID	TATA-containing	2	-2.103	0.221	0.12	0.729	0.694	-0.071
YNL278W	CAF120	TFIID	TATA-less	2	-1.975	-0.193	-0.153	0.467	0.545	0.223
YNL281W	HCH1	TFIID	TATA-less	2	-2.457	-0.314	0.093	0.626	0.55	-0.186
YGL030W	RPL30	TFIID	TATA-less	2	-2.873	-0.13	0.296	0.429	0.483	0.172
YDL007W	RPT2	TFIID	TATA-less	2	-2.192	-0.016	0.012	0.398	0.608	0.614
YPL079W	RPL21B	TFIID	TATA-less	2	-2.914	0.108	0.115	0.487	0.483	-0.011
YLR033W	RSC58	TFIID	TATA-less	2	-1.817	0.024	0.006	0.286	0.212	-0.433
YAR002C-A	ERP1	TFIID	TATA-less	2	-2.406	0.142	0.242	0.388	0.505	0.381
YOR163W	DDP1	TFIID	TATA-less	2	-2.68	0.111	0.088	0.489	0.668	0.45
YFR027W	ECO1	TFIID		2	-2.023	-0.351	-0.089	0.311	0.414	0.415
YJR091C	JSN1	TFIID	TATA-less	2	-2.024	0.056	-0.216	0.589	0.783	0.409
YMR315W	YMR315W	TFIID	TATA-containing	2	-1.707	-0.609	-0.038	1.211	1.316	0.12
YGL228W	SHE10	TFIID	TATA-less	2	-2.046	0.005	0.178	1.446	0.974	-0.57
YBR273C	UBX7	TFIID		2	-2.2	-0.356	-0.095	1.038	0.664	-0.643
YLL009C	COX17	TFIID	TATA-less	2	-2.022	-0.329	0.255	0.466	0.59	0.34
YIR004W	DJP1	TFIID	TATA-less	2	-2.007	-0.104	-0.162	0.902	0.693	-0.38
YKL135C	APL2	TFIID	TATA-less	2	-2.085	0.106	0.066	0.987	0.57	-0.791
YLR089C	ALT1	TFIID	TATA-less	2	-2.143	0.084	0.245	0.956	0.937	-0.029
YER020W	GPA2	TFIID	TATA-containing	2	-2.35	-0.197	-0.021	0.799	0.563	-0.505
YER016W	BIM1	TFIID	TATA-less	2	-2.341	0.045	0.332	0.436	0.411	-0.086
YCR036W	RBK1	TFIID	TATA-less	2	-2.205	-0.189	-0.026	0.301	0.259	-0.22
YBR246W	RRT2	TFIID	TATA-less	2	-2.178	0.061	0.021	0.586	0.379	-0.627
YNL167C	SKO1	TFIID	TATA-less	2	-1.995	0.059	-0.091	0.578	0.394	-0.553
YBL026W	LSM2	TFIID	TATA-less	2	-2.3	-0.219	-0.019	0.407	0.299	-0.446
YCL011C	GBP2	TFIID	TATA-less	2	-2.083	-0.027	-0.129	1.446	0.943	-0.617
YML072C	TCB3	TFIID	TATA-less	2	-2.267	-0.134	-0.113	1.272	0.508	-1.325
YJR143C	PMT4	TFIID	TATA-less	2	-2.398	0.316	0.096	0.952	0.789	-0.272
YMR237W	BCH1	TFIID		2	-1.889	-0.051	0.053	1.691	1.742	0.043
YBR236C	ABD1	TFIID	TATA-less	2	-2.167	0.051	0.082	0.445	0.764	0.779
YOR089C	VPS21	TFIID	TATA-containing	2	-2.305	-0.028	-0.079	0.544	0.937	0.784
YJL190C	RPS22A	TFIID	TATA-less	2	-2.689	-0.079	0.746	0.658	0.625	-0.074
YKL218C	SRY1	TFIID		2	-2.391	-0.052	-0.255	0.992	0.453	-1.13
YPR129W	SCD6	TFIID	TATA-less	2	-2.374	0.167	0.346	0.366	0.561	0.619
YDR524C	AGE1	TFIID	TATA-less	2	-2.331	0.126	0.57	2.704	12.626	2.223
YHR159W	TDA11	TFIID	TATA-less	2	-2.074	-0.336	-0.222	1.38	0.769	-0.844
YDR105C	TMS1	TFIID		2	-2.478	0.148	0.197	0.908	1.266	0.479
YBR181C	RPS6B	TFIID	TATA-less	2	-3.018	-0.003	0.01	0.526	0.427	-0.3
YPR189W	SKI3	TFIID		2	-1.859	-0.082	-0.091	0.332	0.133	-1.324
YIL018W	RPL2B	TFIID	TATA-less	2	-3.082	0.095	-0.039	0.284	0.38	0.42
YKR094C	RPL40B	TFIID	TATA-less	2	-2.961	0.054	0.702	0.723	0.624	-0.211
YGL237C	HAP2	TFIID	TATA-less	2	-2.148	0.201	0.378	0.593	0.483	-0.297
YLR186W	EMG1	TFIID	TATA-less	2	-2.063	-0.251	0.382	1.105	0.884	-0.321
YER068W	MOT2	TFIID	TATA-less	2	-1.82	-0.017	-0.113	0.515	0.418	-0.299
YBL035C	POL12	TFIID	TATA-containing	2	-2.02	-0.042	0.046	0.567	0.301	-0.913
YIL115C	NUP159	TFIID	TATA-less	2	-2.061	-0.102	-0.178	0.86	0.678	-0.343
YER021W	RPN3	TFIID	TATA-less	2	-2.141	0.133	0.212	0.79	0.708	-0.159
YPL183W-A	RTC6	TFIID	TATA-less	2	-2.415	-0.34	-0.123	0.673	0.325	-1.05
YDR238C	SEC26	TFIID	TATA-less	2	-2.041	0.031	-0.009	1.288	0.658	-0.97
YML068W	ITT1	TFIID	TATA-less	2	-1.886	-0.342	-0.297	0.358	0.224	-0.678
YDR430C	CYM1	TFIID		2	-2.009	-0.18	0.102	0.444	0.365	-0.284
YPL120W	VPS30	TFIID	TATA-less	2	-2.106	-0.219	0.031	0.717	0.876	0.289
YBR263W	SHM1	TFIID		2	-2.37	-0.113	-0.076	0.428	0.498	0.217
YOL113W	SKM1	TFIID	TATA-less	2	-2.319	0.166	-0.026	0.545	0.617	0.18
YIL004C	BET1	TFIID	TATA-less	2	-2.642	-0.037	0.35	0.492	0.57	0.212
YDL207W	GLE1	TFIID	TATA-less	2	-2.104	0.34	0.24	1.186	1.148	-0.047
YCL005W-A	VMA9	TFIID		2	-2.019	0.075	0.462	0.129	0.143	0.147
YJL174W	KRE9	TFIID	TATA-less	2	-1.955	-0.158	0.093	0.699	0.492	-0.505
YKL089W	MIF2	TFIID	TATA-less	2	-2.22	-0.172	0.343	0.646	0.766	0.245
YDR091C	RLI1	TFIID	TATA-less	2	-2.135	-0.06	0.073	0.874	0.728	-0.264
YLR430W	SEN1	TFIID	TATA-less	2	-1.944	0.006	0.052	0.877	0.646	-0.44
YGR077C	PEX8	TFIID		2	-1.932	-0.022	-0.104	1.594	1.915	0.265
YBR287W	YBR287W	TFIID	TATA-containing	2	-2.007	-0.109	0.148	0.78	1.115	0.515
YOR172W	YRM1	TFIID	TATA-less	2	-2.024	-0.322	-0.063	0.893	0.485	-0.881
YBL042C	FUI1	TFIID	TATA-less	2	-1.759	0.027	0.019	1.266	0.983	-0.365
YPR029C	APL4	TFIID	TATA-less	2	-1.758	-0.243	-0.041	0.309	0.228	-0.44
YKL013C	ARC19	TFIID		2	-2.196	-0.071	0.206	0.83	0.866	0.061
YNL106C	INP52	TFIID	TATA-less	2	-1.913	-0.27	-0.243	0.465	1.293	1.477
YIL035C	CKA1	TFIID	TATA-less	2	-1.968	0.146	-0.04	1.213	0.912	-0.411
YHR011W	DIA4	TFIID	TATA-containing	2	-2.271	0.222	0.052	1.553	1.449	-0.1
YOL076W	MDM20	TFIID	TATA-less	2	-1.764	-0.017	0.143	0.888	0.505	-0.813
YKR001C	VPS1	TFIID	TATA-less	2	-2.036	-0.211	0.047	0.857	0.569	-0.592
YIL143C	SSL2	TFIID		2	-1.97	-0.003	-0.049	1.012	0.663	-0.611
YDR321W	ASP1	TFIID	TATA-less	2	-2.659	-0.077	0.165	1.091	1.175	0.108
YCR067C	SED4	TFIID	TATA-less	2	-1.927	-0.052	0.022	0.965	0.438	-1.14
YDL157C	YDL157C	TFIID	TATA-less	2	-2.125	-0.318	0.497	0.506	0.708	0.484
YMR216C	SKY1	TFIID	TATA-less	2	-2.188	0.03	-0.049	0.621	0.572	-0.119
YIL034C	CAP2	TFIID	TATA-less	2	-1.883	0.053	0.371	0.404	0.473	0.229
YKL196C	YKT6	TFIID	TATA-less	2	-2.149	0.123	0.092	0.66	0.682	0.047
YJL039C	NUP192	TFIID	TATA-less	2	-1.896	-0.013	-0.019	0.348	0.466	0.42
YOR353C	SOG2	TFIID	TATA-less	2	-1.746	-0.034	-0.12	0.862	0.614	-0.49
YDL130W-A	STF1	TFIID	TATA-less	2	-2.039	-0.205	0.272	0.58	0.815	0.491
YHR102W	KIC1	TFIID	TATA-less	2	-1.914	0.118	0.026	0.667	0.558	-0.257
YLR139C	SLS1	TFIID		2	-2.334	0.03	0.3	1.236	1.212	-0.029
YNL307C	MCK1	TFIID	TATA-less	2	-1.893	-0.368	-0.071	1.852	1.13	-0.713
YNL211C	YNL211C	TFIID	TATA-less	2	-2.475	-0.619	0.72	0.768	1.261	0.715
YDR246W	TRS23	TFIID	TATA-less	2	-2.32	-0.375	0.225	0.821	0.641	-0.358
YNL004W	HRB1	TFIID		2	-2.07	0.03	-0.039	0.495	0.342	-0.531
YNR047W	FPK1	TFIID	TATA-less	2	-2.089	0.223	0.264	2.432	3.943	0.697
YBR225W	YBR225W	TFIID		2	-2.266	-0.174	0.133	0.778	0.363	-1.099
YLR330W	CHS5	TFIID	TATA-less	2	-1.977	-0.033	-0.23	0.705	0.297	-1.246
YDR212W	TCP1	TFIID	TATA-less	2	-2.293	0.14	0.066	0.525	0.692	0.399
YGR142W	BTN2	CR	TATA-containing	2	-2.588	0.01	0.106	0.352	0.488	0.475
YJL208C	NUC1	TFIID	TATA-less	2	-2.531	0.119	0.467	1.079	1.107	0.037
YLR429W	CRN1	TFIID	TATA-less	2	-2.167	0.15	-0.008	0.662	0.595	-0.154
YNL041C	COG6	TFIID	TATA-less	2	-1.461	-0.288	-0.295	0.571	0.564	-0.019
YDR169C	STB3	TFIID	TATA-less	2	-2.209	-0.086	0.017	1.491	1.204	-0.308
YDR379W	RGA2	TFIID	TATA-less	2	-1.968	-0.454	-0.553	0.552	0.516	-0.098
YLR422W	YLR422W	TFIID	TATA-containing	2	-1.949	0.05	-0.009	0.578	0.441	-0.391
YBR098W	MMS4	TFIID		2	-1.894	-0.079	-0.097	0.546	0.287	-0.93
YNL185C	MRPL19	TFIID		2	-2.106	0.034	0.144	0.674	0.681	0.015
YMR008C	PLB1	TFIID		2	-2.631	0.104	-0.13	1.372	0.465	-1.56
YMR285C	NGL2	TFIID	TATA-less	2	-2.087	-0.298	0.041	1.045	1.029	-0.021
YLR405W	DUS4	TFIID	TATA-less	2	-2.291	-0.482	-0.586	0.16	0.31	0.956
YDR219C	MFB1	TFIID	TATA-less	2	-1.835	0.129	0.156	0.645	0.552	-0.226
YKL025C	PAN3	TFIID	TATA-less	2	-1.825	-0.133	0.005	1.015	0.721	-0.493
YGR218W	CRM1	TFIID	TATA-less	2	-1.98	-0.055	0.013	0.483	0.713	0.562
YOL082W	ATG19	TFIID		2	-2.066	0.063	0.084	1.976	1.142	-0.791
YHR097C	YHR097C	TFIID	TATA-less	2	-2.457	-0.368	0.005	0.7	0.962	0.458
YJR010W	MET3	TFIID	TATA-less	2	-2.166	-0.287	0.272	0.3	0.309	0.04
YMR116C	ASC1	TFIID	TATA-less	2	-2.938	-0.063	0.097	0.733	0.537	-0.448
YOL108C	INO4	TFIID	TATA-less	2	-2.605	-0.003	0.076	0.764	0.474	-0.689
YOR329C	SCD5	TFIID	TATA-less	2	-2.206	-0.109	-0.128	1.304	2.446	0.908
YJL085W	EXO70	TFIID	TATA-less	2	-2.106	-0.106	-0.073	0.336	0.482	0.521
YOL039W	RPP2A	TFIID	TATA-less	2	-3.193	0.201	0.381	0.667	0.669	0.006
YDL131W	LYS21	TFIID	TATA-containing	2	-2.217	0.049	0.396	1.034	0.666	-0.635
YOR037W	CYC2	TFIID	TATA-less	2	-2.542	0.158	0.166	0.339	0.337	-0.01
YIR033W	MGA2	TFIID	TATA-less	2	-1.752	-0.143	0.082	0.993	0.828	-0.262
YMR129W	POM152	TFIID	TATA-less	2	-1.838	-0.142	-0.146	0.605	1.17	0.951
YBR221C	PDB1	TFIID	TATA-less	2	-2.688	0.029	0.106	0.802	1.115	0.475
YBL050W	SEC17	TFIID	TATA-less	2	-1.834	-0.085	0.115	0.558	0.264	-1.079
YGL129C	RSM23	TFIID	TATA-containing	2	-1.874	-0.133	-0.028	0.587	0.335	-0.806
YMR126C	DLT1	TFIID	TATA-less	2	-2.178	0.093	0.043	1.164	0.59	-0.981
YOR211C	MGM1	TFIID	TATA-less	2	-1.639	-0.039	0.084	0.678	0.7	0.047
YPR081C	GRS2	TFIID		2	-1.424	0.032	0.255	0.26	0.135	-0.944
YJL081C	ARP4	TFIID	TATA-less	2	-2.219	0.178	0.31	0.587	0.356	-0.721
YNL308C	KRI1	TFIID	TATA-less	2	-2.206	0.159	0.043	0.421	0.365	-0.207
YML010W	SPT5	TFIID	TATA-less	2	-1.873	0.096	0.104	0.738	0.912	0.306
YPL213W	LEA1	TFIID	TATA-less	2	-2.274	-0.314	0.192	0.3	0.347	0.21
YER032W	FIR1	TFIID	TATA-less	2	-2.213	0.28	0.237	0.916	0.969	0.08
YER059W	PCL6	TFIID	TATA-less	2	-2.176	0.059	0.089	0.398	0.418	0.069
YER110C	KAP123	TFIID	TATA-less	2	-2.375	-0.126	-0.196	0.601	0.39	-0.623
YDR261C	EXG2	TFIID	TATA-containing	2	-2.262	-0.197	0.787	0.648	0.621	-0.06
YER170W	ADK2	TFIID	TATA-less	2	-2.349	-0.356	-0.266	1.215	0.874	-0.475
YMR080C	NAM7	TFIID	TATA-less	2	-2.136	0.013	-0.005	0.537	0.407	-0.398
YHR200W	RPN10	TFIID	TATA-less	2	-2.23	0.029	-0.05	0.322	0.34	0.078
YLR181C	VTA1	TFIID		2	-1.409	-0.035	0.402	0.142	0.084	-0.754
YBR035C	PDX3	TFIID	TATA-less	2	-1.966	-0.242	0.283	0.698	1.069	0.616
YOR160W	MTR10	TFIID	TATA-less	2	-1.91	-0.103	-0.057	0.466	0.542	0.218
YDL083C	RPS16B	TFIID	TATA-less	2	-2.863	-0.068	0.147	0.736	0.543	-0.439
YDR394W	RPT3	TFIID	TATA-less	2	-2.191	0.025	0.187	0.444	0.664	0.579
YNL230C	ELA1	TFIID	TATA-less	2	-2.284	-0.144	-0.196	0.56	0.264	-1.087
YOR293W	RPS10A	TFIID	TATA-less	2	-2.874	-0.098	0.086	0.758	0.698	-0.119
YFR004W	RPN11	TFIID	TATA-less	2	-2.181	-0.135	-0.18	0.631	0.521	-0.276
YNL039W	BDP1	TFIID	TATA-less	2	-2.12	-0.081	0.07	0.777	1.055	0.442
YNL139C	THO2	TFIID	TATA-less	2	-2.125	0.111	0.031	0.714	0.511	-0.482
YKL065C	YET1	TFIID	TATA-less	2	-2.367	-0.149	0.513	0.907	0.79	-0.199
YGR184C	UBR1	TFIID		2	-1.907	-0.03	0.081	1.528	0.947	-0.69
YOR308C	SNU66	TFIID	TATA-less	2	-2.41	0.188	0.464	0.903	1.12	0.311
YKL106W	AAT1	TFIID	TATA-containing	2	-2.221	0.225	0.404	1.256	0.37	-1.762
YMR202W	ERG2	TFIID	TATA-containing	2	-2.298	0.261	0.28	0.573	0.674	0.233
YIL109C	SEC24	TFIID	TATA-less	2	-2.045	-0.03	0.138	0.648	0.397	-0.706
YPL263C	KEL3	TFIID	TATA-less	2	-2.248	-0.34	-0.279	0.368	0.491	0.419
YNR046W	TRM112	TFIID	TATA-less	2	-2.629	0.263	0.545	0.688	0.623	-0.142
YNL061W	NOP2	TFIID	TATA-less	2	-2.26	0.151	-0.059	1.097	0.831	-0.4
YNL137C	NAM9	TFIID	TATA-less	2	-2.154	0.217	0.155	0.531	0.565	0.09
YBR195C	MSI1	TFIID	TATA-less	2	-2.207	-0.147	-0.107	0.675	2.075	1.619
YLR071C	RGR1	TFIID	TATA-less	2	-1.98	0.066	-0.137	0.894	0.842	-0.086
YDL202W	MRPL11	TFIID	TATA-less	2	-2.451	-0.018	0.265	0.444	0.519	0.226
YOR103C	OST2	TFIID	TATA-less	2	-2.756	0.115	0.157	0.696	0.31	-1.165
YDL113C	ATG20	TFIID		2	-2.031	0.164	-0.194	0.697	0.68	-0.036
YCR028C-A	RIM1	TFIID	TATA-less	2	-2.421	-0.105	0.794	0.376	0.597	0.668
YLR359W	ADE13	TFIID	TATA-containing	2	-2.044	-0.057	0.088	0.933	1.785	0.935
YGR274C	TAF1	TFIID		2	-1.846	-0.245	-0.071	1.687	2.79	0.726
YFR006W	YFR006W	TFIID		2	-2.453	0.199	0.253	0.426	0.652	0.615
YBR079C	RPG1	TFIID	TATA-less	2	-2.121	-0.083	0.272	0.696	0.211	-1.723
YHR019C	DED81	TFIID	TATA-less	2	-2.342	-0.033	0.012	0.748	0.596	-0.328
YGR127W	YGR127W	TFIID		2	-2.286	-0.374	0.013	0.369	0.283	-0.385
YBR166C	TYR1	TFIID		2	-2.188	0.052	-0.177	0.648	0.378	-0.779
YER152C	YER152C	TFIID		2	-2.018	-0.198	-0.472	1.295	0.972	-0.414
YAR018C	KIN3	TFIID	TATA-less	2	-1.945	0.158	-0.206	0.397	0.583	0.554
YLR170C	APS1	TFIID	TATA-less	2	-2.073	0	0.116	1.388	1.006	-0.465
YGR034W	RPL26B	TFIID	TATA-less	2	-3.093	-0.086	0.126	0.573	0.889	0.633
YDR306C	YDR306C	TFIID		2	-2.183	-0.186	-0.024	0.551	1.134	1.04
YER136W	GDI1	TFIID	TATA-less	2	-2.519	-0.048	0.203	1.299	0.463	-1.49
YKL018C-A	YKL018C-A	TFIID		2	-2.805	0.245	0.759	0.368	0.357	-0.042
YOR367W	SCP1	TFIID		2	-2.489	0.02	0.106	0.803	0.913	0.184
YJL041W	NSP1	TFIID	TATA-less	2	-2.056	-0.015	0.141	0.51	0.965	0.92
YGL238W	CSE1	TFIID	TATA-less	2	-1.976	0.092	-0.082	0.905	0.637	-0.507
YOR090C	PTC5	TFIID	TATA-less	2	-2.154	-0.201	-0.082	1.79	0.839	-1.092
YLR244C	MAP1	TFIID	TATA-less	2	-2.094	0.099	0.011	0.431	0.373	-0.209
YIL076W	SEC28	TFIID	TATA-less	2	-1.858	-0.264	0.061	0.4	0.395	-0.019
YER012W	PRE1	TFIID	TATA-less	2	-2.36	0.208	0.214	0.288	0.329	0.19
YAL017W	PSK1	TFIID		2	-1.859	-0.095	-0.104	0.525	0.545	0.054
YPL010W	RET3	TFIID	TATA-less	2	-1.891	-0.131	-0.284	0.517	0.459	-0.171
YDR159W	SAC3	TFIID	TATA-less	2	-2.163	-0.092	-0.027	0.752	1.232	0.712
YKL047W	ANR2	TFIID	TATA-less	2	-1.932	-0.388	0.12	0.745	0.399	-0.899
YDL234C	GYP7	TFIID		2	-2.05	-0.401	-0.228	0.48	0.391	-0.295
YKR068C	BET3	TFIID	TATA-less	2	-2.171	0.092	0.271	0.591	0.78	0.401
YCL037C	SRO9	TFIID	TATA-less	2	-2.737	0.047	0.138	0.654	0.588	-0.154
YKL134C	2021-10-01	TFIID	TATA-less	2	-2.313	-0.051	0.128	0.375	0.446	0.248
YDR320C-A	DAD4	TFIID		2	-2.673	0.109	0.617	0.616	0.772	0.324
YBR200W	BEM1	TFIID	TATA-less	2	-2.232	-0.413	-0.006	0.928	1.06	0.192
YLR293C	GSP1	TFIID	TATA-less	2	-2.697	0.002	0.048	0.544	0.377	-0.531
YPR103W	PRE2	TFIID	TATA-less	2	-2.084	0.002	0.054	0.301	0.397	0.399
YFR011C	MIC19	TFIID	TATA-less	2	-2.244	-0.757	0.417	0.521	0.3	-0.796
YNL126W	SPC98	TFIID	TATA-less	2	-1.775	-0.115	-0.045	1.008	0.444	-1.183
YLR412W	BER1	TFIID	TATA-less	2	-1.843	-0.156	0.213	0.344	0.346	0.011
YPR025C	CCL1	TFIID	TATA-less	2	-1.876	-0.046	-0.39	0.428	0.753	0.815
YDR182W	CDC1	TFIID		2	-2.008	0.17	0.063	0.612	0.508	-0.271
YDR507C	GIN4	TFIID	TATA-less	2	-1.769	-0.189	-0.029	0.523	0.568	0.117
YOR182C	RPS30B	TFIID	TATA-less	2	-3.122	0.128	0.148	0.376	0.463	0.298
YNL091W	NST1	TFIID	TATA-containing	2	-2.007	-0.041	0.03	0.473	0.775	0.712
YGR253C	PUP2	TFIID	TATA-less	2	-2.011	-0.275	-0.151	0.479	0.433	-0.145
YPL237W	SUI3	TFIID	TATA-less	2	-2.449	0.227	0.102	0.606	0.546	-0.15
YGL148W	ARO2	TFIID	TATA-less	2	-2.483	0.106	0.035	0.665	0.344	-0.949
YFR014C	CMK1	TFIID		2	-2.155	-0.118	-0.093	0.216	0.081	-1.412
YAL034W-A	MTW1	TFIID	TATA-less	2	-2.016	-0.178	-0.433	0.788	1.037	0.395
YIR011C	STS1	TFIID	TATA-less	2	-1.895	-0.215	-0.248	0.414	0.483	0.224
YPR124W	CTR1	TFIID	TATA-less	2	-2.651	-0.001	0.366	0.454	0.757	0.738
YMR256C	COX7	TFIID	TATA-less	2	-2.037	0.08	0.385	0.422	0.31	-0.447
YFR032C-A	RPL29	TFIID	TATA-less	2	-3.377	0.398	0.246	0.399	0.462	0.214
YLR010C	TEN1	TFIID	TATA-less	2	-2.565	-0.361	-0.142	0.129	0.139	0.113
YLR357W	RSC2	TFIID	TATA-less	2	-1.968	-0.034	-0.092	0.491	0.35	-0.488
YBR146W	MRPS9	TFIID	TATA-less	2	-2.189	-0.124	0.412	0.568	0.63	0.148
YHR119W	SET1	TFIID	TATA-less	2	-2.04	-0.07	-0.107	0.876	0.69	-0.345
YCL034W	LSB5	TFIID	TATA-containing	2	-2.368	0.176	-0.012	1.123	0.823	-0.448
YDR189W	SLY1	TFIID	TATA-less	2	-2.033	0.17	0.047	0.726	0.685	-0.084
YJL168C	SET2	TFIID	TATA-less	2	-2.034	-0.008	0.092	0.763	0.899	0.236
YLR448W	RPL6B	TFIID	TATA-less	2	-3.077	0.026	0.032	0.623	0.667	0.097
YHR006W	STP2	TFIID	TATA-less	2	-2.034	-0.086	0.012	0.76	0.565	-0.429
YKL014C	URB1	TFIID	TATA-less	2	-2.108	0.089	-0.045	0.706	0.562	-0.33
YLL050C	COF1	TFIID	TATA-less	2	-2.397	-0.011	0.398	0.422	0.462	0.132
YNL073W	MSK1	TFIID	TATA-less	2	-2.043	-0.078	-0.115	0.486	0.39	-0.317
YGL022W	STT3	TFIID	TATA-less	2	-1.904	-0.152	-0.086	0.713	1.199	0.75
YDR391C	YDR391C	TFIID		2	-2.261	0.128	0.238	0.995	0.656	-0.6
YGR106C	VOA1	TFIID	TATA-less	2	-1.907	-0.042	0.292	0.534	0.364	-0.551
YHR048W	YHK8	TFIID		2	-2.46	-0.215	-0.413	0.531	1.005	0.921
YGL210W	YPT32	TFIID	TATA-less	2	-1.19	0.111	-0.485	0.443	0.181	-1.291
YGL073W	HSF1	TFIID	TATA-less	2	-1.737	-0.037	0.032	0.358	0.324	-0.143
YER086W	ILV1	TFIID	TATA-less	2	-2.39	-0.107	0.108	0.826	0.691	-0.259
YOR061W	CKA2	TFIID	TATA-containing	2	-1.803	-0.048	-0.078	0.584	0.263	-1.15
YLL021W	SPA2	TFIID	TATA-less	2	-1.955	0.038	-0.025	0.846	0.637	-0.41
YKL171W	NNK1	TFIID	TATA-less	2	-2.383	0.183	0.062	2.372	1.464	-0.696
YBL081W	YBL081W	TFIID	TATA-less	2	-2.29	0.09	0.055	0.408	0.313	-0.386
YBR038W	CHS2	TFIID	TATA-less	2	-1.933	-0.129	0.018	0.945	0.794	-0.251
YDL006W	PTC1	TFIID	TATA-less	2	-2.1	0.011	-0.179	0.616	0.614	-0.005
YDR298C	ATP5	TFIID	TATA-less	2	-1.673	-0.089	-0.094	0.332	0.338	0.027
YHR107C	CDC12	TFIID	TATA-less	3	-2.026	-0.207	-0.04	0.663	0.521	-0.349
YNR031C	SSK2	TFIID		3	-1.835	-0.089	-0.052	0.525	0.665	0.34
YML015C	TAF11	TFIID		3	-1.785	-0.181	-0.38	0.34	0.98	1.527
YDR498C	SEC20	TFIID	TATA-less	2	-2.131	-0.31	-0.184	0.519	0.568	0.129
YKL059C	MPE1	TFIID	TATA-less	2	-2.469	-0.191	0.01	0.237	0.531	1.163
YGR275W	RTT102	TFIID	TATA-less	2	-2.533	-0.053	-0.177	0.685	1.047	0.613
YIL142W	CCT2	TFIID	TATA-less	2	-1.942	-0.057	-0.012	0.538	0.625	0.217
YOR098C	NUP1	TFIID	TATA-less	3	-2.044	-0.009	-0.024	0.511	0.742	0.539
YMR230W	RPS10B	TFIID	TATA-less	3	-2.811	-0.052	0.026	0.377	0.209	-0.848
YLL062C	MHT1	TFIID	TATA-less	3	-2.563	-0.234	0.237	0.496	0.95	0.939
YGL091C	NBP35	TFIID		3	-2.038	-0.47	0.917	0.61	2.216	1.862
YER017C	AFG3	TFIID	TATA-less	3	-2.016	0.079	-0.037	1.15	0.897	-0.359
YNL178W	RPS3	TFIID	TATA-less	3	-3.18	-0.048	0.259	0.418	0.512	0.292
YPR183W	DPM1	TFIID	TATA-less	3	-2.567	-0.029	0.049	0.5	0.409	-0.289
YML025C	YML6	TFIID	TATA-less	3	-1.947	-0.154	0.291	0.299	0.481	0.683
YOR196C	LIP5	TFIID	TATA-less	3	-1.61	-0.381	-0.062	0.526	1.004	0.933
YJR066W	TOR1	TFIID	TATA-less	3	-1.719	-0.145	-0.109	0.493	0.5	0.021
YKR100C	SKG1	TFIID	TATA-less	3	-2.153	-0.028	-0.095	0.747	1.217	0.704
YJR075W	HOC1	TFIID	TATA-less	3	-2.168	-0.177	-0.133	1.023	0.487	-1.07
YMR117C	SPC24	TFIID	TATA-less	3	-2.532	0.169	0.216	0.661	0.618	-0.096
YPL228W	CET1	TFIID	TATA-less	3	-1.998	-0.036	0.087	0.561	0.341	-0.719
YJR132W	NMD5	TFIID	TATA-less	3	-2.234	0.079	0.098	0.925	0.923	-0.004
YOR385W	YOR385W	TFIID	TATA-containing	3	-1.986	-0.559	-0.375	1.067	0.36	-1.568
YPL107W	YPL107W	TFIID	TATA-less	3	-2.563	-0.331	0.298	0.844	0.819	-0.043
YNL090W	RHO2	TFIID	TATA-less	3	-2.09	0.221	0.306	0.545	0.453	-0.265
YFR042W	KEG1	TFIID	TATA-less	3	-2.373	0.432	0.628	0.329	0.417	0.343
YOL111C	MDY2	TFIID	TATA-less	3	-2.516	-0.068	-0.22	0.384	0.279	-0.459
YOR159C	SME1	TFIID	TATA-less	3	-2.192	0.179	0.212	0.502	0.725	0.53
YNR033W	ABZ1	TFIID	TATA-containing	3	-2.147	-0.072	-0.064	0.687	0.884	0.364
YJR093C	FIP1	TFIID	TATA-less	3	-1.927	-0.132	0.041	0.183	0.251	0.458
YEL015W	EDC3	TFIID	TATA-less	3	-2.098	-0.106	0.091	0.66	0.572	-0.205
YHR167W	THP2	TFIID	TATA-less	3	-2.286	-0.423	-0.287	0.898	0.583	-0.623
YKL002W	DID4	TFIID	TATA-less	3	-2.345	-0.166	-0.06	0.735	0.414	-0.827
YDR265W	PEX10	TFIID	TATA-less	3	-2.409	0.152	0.406	0.237	0.634	1.423
YJR064W	CCT5	TFIID	TATA-less	3	-1.906	-0.064	-0.081	0.664	0.758	0.19
YBR096W	YBR096W	TFIID	TATA-less	3	-1.961	-0.417	0.08	0.7	0.601	-0.221
YDR181C	SAS4	TFIID		3	-2.425	0.117	0.219	0.526	0.483	-0.124
YER094C	PUP3	TFIID	TATA-less	3	-2.409	0.094	0.348	0.443	0.692	0.645
YNR052C	POP2	TFIID	TATA-less	3	-2.227	0.349	0.056	0.669	0.826	0.305
YML117W	NAB6	TFIID	TATA-less	3	-2.033	0.004	-0.053	1.009	0.665	-0.601
YOR057W	SGT1	TFIID	TATA-less	3	-2.434	0.076	0.378	0.356	0.46	0.371
YGL060W	YBP2	TFIID		3	-2.052	-0.019	-0.179	0.674	0.649	-0.055
YJL129C	TRK1	TFIID	TATA-less	3	-2.174	0.037	-0.006	0.471	0.532	0.176
YPL003W	ULA1	TFIID	TATA-less	3	-2.617	-0.004	0.323	1.067	0.65	-0.715
YDR168W	CDC37	TFIID	TATA-less	3	-2.025	-0.281	-0.021	0.431	0.536	0.315
YDR480W	DIG2	TFIID	TATA-less	3	-2.378	-0.051	0.001	0.396	0.141	-1.484
YGL172W	NUP49	TFIID	TATA-less	3	-2.008	-0.142	0.315	0.732	0.715	-0.034
YPL204W	HRR25	TFIID	TATA-less	3	-2.421	-0.044	0.066	0.514	0.681	0.406
YLR426W	TDA5	TFIID	TATA-less	3	-2.242	-0.321	0.141	0.688	0.688	0.001
YHR057C	CPR2	TFIID		3	-2.457	-0.162	0.364	0.866	0.489	-0.825
YOR285W	RDL1	TFIID	TATA-containing	3	-2.606	-0.065	0.066	0.732	0.785	0.101
YOR372C	NDD1	TFIID	TATA-less	3	-2.176	0.155	0.162	0.842	0.399	-1.078
YBR170C	NPL4	TFIID		3	-2.549	0.225	0.215	0.317	0.317	-0.001
YMR190C	SGS1	TFIID	TATA-less	3	-1.835	-0.022	-0.179	0.589	0.619	0.071
YOR035C	SHE4	TFIID	TATA-less	3	-2.058	-0.24	-0.004	0.384	0.787	1.034
YPR019W	MCM4	TFIID	TATA-less	3	-1.98	-0.237	-0.001	0.814	0.688	-0.244
YOR043W	WHI2	TFIID	TATA-less	3	-2.665	0.104	0.083	0.646	0.765	0.243
YOR341W	RPA190	TFIID	TATA-less	3	-2.434	-0.025	0.076	0.685	0.403	-0.764
YMR222C	FSH2	TFIID	TATA-less	3	-2.438	-0.178	-0.124	0.421	0.39	-0.11
YDR266C	HEL2	TFIID	TATA-less	3	-2.424	0.103	0.289	0.816	0.796	-0.036
YDL101C	DUN1	TFIID	TATA-less	3	-2.002	0.075	0.027	1.071	0.95	-0.173
YPR095C	SYT1	TFIID	TATA-less	3	-2.161	-0.08	0.007	0.585	0.487	-0.264
YOR171C	LCB4	TFIID	TATA-less	3	-2.118	0.144	0.27	1.104	1.2	0.121
YNL271C	BNI1	TFIID	TATA-less	3	-2.23	-0.054	-0.155	0.974	0.481	-1.018
YDR350C	ATP22	TFIID	TATA-less	3	-1.939	0.005	0.05	0.974	0.931	-0.065
YJR070C	LIA1	TFIID	TATA-less	3	-2.253	-0.025	0.302	0.569	0.599	0.074
YHR147C	MRPL6	TFIID		3	-2.405	-0.033	0.203	1.049	0.896	-0.228
YDR204W	COQ4	TFIID		3	-2.746	-0.103	0.288	0.891	1.23	0.465
YLR398C	SKI2	TFIID	TATA-less	3	-1.849	-0.069	0.05	0.755	1.913	1.342
YKR006C	MRPL13	TFIID	TATA-less	3	-2.221	0.27	0.132	1.42	1.357	-0.065
YMR218C	TRS130	TFIID		3	-2.061	-0.072	-0.048	0.572	0.596	0.06
YDR414C	ERD1	TFIID		3	-2.385	0.149	0.048	0.74	0.792	0.099
YNL083W	SAL1	TFIID		3	-2.136	0.052	0.047	0.7	0.822	0.233
YGL231C	EMC4	TFIID		3	-2.028	-0.017	-0.157	0.319	0.252	-0.34
YDL078C	MDH3	TFIID	TATA-containing	3	-2.258	0.031	0.547	0.375	0.589	0.65
YCR042C	TAF2	TFIID	TATA-less	3	-2.256	0.047	0.038	0.483	0.508	0.074
YLR131C	ACE2	TFIID	TATA-less	3	-2.34	0.064	-0.134	0.688	0.776	0.174
YEL061C	CIN8	TFIID	TATA-less	3	-2.088	-0.139	-0.189	0.563	0.685	0.282
YGL221C	NIF3	TFIID	TATA-containing	3	-2.199	-0.124	0.308	0.286	0.504	0.816
YJR113C	RSM7	TFIID	TATA-less	3	-2.609	0.094	0.104	0.542	0.697	0.363
YDL027C	YDL027C	TFIID	TATA-less	3	-2.01	0.032	0.341	0.899	0.816	-0.138
YPR098C	YPR098C	TFIID	TATA-less	3	-2.459	-0.353	0.633	0.499	0.603	0.273
YDR387C	YDR387C	TFIID	TATA-less	3	-2.409	0.223	0.177	0.508	0.473	-0.102
YOR132W	VPS17	TFIID	TATA-less	3	-2.17	-0.165	-0.097	0.319	0.315	-0.018
YGL140C	YGL140C	TFIID	TATA-less	3	-1.933	-0.189	-0.162	0.625	1.342	1.102
YGL092W	NUP145	TFIID	TATA-less	3	-2.198	0.086	-0.066	0.513	0.628	0.291
YMR310C	YMR310C	TFIID	TATA-less	3	-2.309	-0.252	0.547	1.343	1.924	0.518
YER117W	RPL23B	TFIID	TATA-less	3	-3.066	0.053	0.044	0.518	0.516	-0.006
YMR033W	ARP9	TFIID	TATA-containing	3	-1.996	0.029	0.024	0.572	0.337	-0.765
YDL235C	YPD1	TFIID	TATA-less	3	-2.288	0.164	0.136	0.662	0.687	0.053
YOR020W-A	YOR020W-A	TFIID	TATA-less	3	-2.399	-0.279	0.069	0.773	0.626	-0.305
YER125W	RSP5	TFIID		3	-2.016	-0.008	0.008	0.672	0.691	0.041
YBL046W	PSY4	TFIID	TATA-less	3	-2.351	0.04	0.358	1.003	0.37	-1.44
YDR450W	RPS18A	TFIID	TATA-less	3	-2.929	-0.186	0.318	0.612	0.545	-0.167
YOR187W	TUF1	TFIID	TATA-less	3	-2.062	-0.158	0.14	0.553	0.384	-0.525
YGR195W	SKI6	TFIID	TATA-less	3	-2.282	-0.281	0.01	0.399	0.395	-0.014
YMR225C	MRPL44	TFIID	TATA-less	3	-2.82	-0.067	1.046	1.211	2.182	0.849
YBL024W	NCL1	TFIID	TATA-less	3	-1.986	-0.214	-0.213	1.171	1.205	0.041
YGL025C	PGD1	TFIID	TATA-less	3	-2.424	0.365	0.29	1.195	0.756	-0.661
YOR307C	SLY41	TFIID		3	-2.19	0.002	0.183	0.429	0.29	-0.564
YMR241W	YHM2	TFIID	TATA-less	3	-2.33	-0.153	0.043	0.721	0.633	-0.188
YNL047C	SLM2	TFIID	TATA-less	3	-1.946	0.09	0.2	1.137	0.463	-1.297
YCL057W	PRD1	TFIID	TATA-less	3	-1.785	-0.267	-0.141	0.41	0.777	0.923
YJR076C	CDC11	TFIID	TATA-less	3	-2.149	0.078	-0.063	0.572	0.503	-0.185
YPL220W	RPL1A	TFIID	TATA-less	3	-2.876	-0.142	0.4	0.544	0.486	-0.164
YDL150W	RPC53	TFIID	TATA-less	3	-2.805	0.285	0.23	0.405	0.749	0.885
YBR003W	COQ1	TFIID	TATA-less	3	-2.084	-0.094	-0.048	0.714	0.876	0.294
YDR235W	PRP42	TFIID	TATA-less	3	-2.52	-0.058	0.242	0.5	0.443	-0.174
YKL012W	PRP40	TFIID	TATA-less	3	-1.917	-0.325	-0.52	0.745	0.685	-0.122
YCR053W	THR4	TFIID	TATA-less	3	-2.229	-0.089	-0.031	1.069	0.537	-0.992
YER019C-A	SBH2	TFIID	TATA-less	3	-2.765	0.04	0.527	0.657	0.644	-0.029
YDL240W	LRG1	TFIID	TATA-less	3	-2.156	-0.032	-0.093	0.701	1.002	0.515
YHR158C	KEL1	TFIID	TATA-less	3	-2.084	-0.183	-0.214	0.579	0.276	-1.068
YBR296C	PHO89	CR	TATA-containing	3	-2.217	-0.308	-0.219	0.965	1.665	0.786
YLR288C	MEC3	TFIID		3	-2.472	-0.253	0.051	0.308	0.394	0.354
YNL166C	BNI5	TFIID	TATA-less	3	-2.103	-0.011	0.163	0.854	0.731	-0.225
YCR008W	SAT4	TFIID	TATA-containing	3	-2.117	-0.065	-0.176	0.422	0.252	-0.745
YGR074W	SMD1	TFIID	TATA-less	3	-2.359	0.242	0.339	0.371	0.338	-0.136
YER143W	DDI1	TFIID		3	-1.854	-0.318	-0.515	0.526	0.331	-0.671
YNR029C	YNR029C	TFIID	TATA-containing	3	-2.484	0.136	0.356	0.507	0.237	-1.097
YDL236W	PHO13	TFIID	TATA-less	3	-2.37	-0.206	-0.082	0.396	1.253	1.662
YDR463W	STP1	TFIID	TATA-less	3	-2.085	-0.139	-0.012	1.146	0.946	-0.278
YOL137W	BSC6	TFIID		3	-1.913	0.021	0.158	0.411	0.264	-0.636
YOL115W	PAP2	TFIID	TATA-less	3	-2.16	0.018	0.18	0.692	0.568	-0.285
YGL178W	MPT5	TFIID	TATA-less	3	-2.535	0.197	0.011	0.767	0.638	-0.266
YPL009C	RQC2	TFIID		3	-2.131	0.092	-0.022	0.46	0.292	-0.659
YGL255W	ZRT1	CR	TATA-less	3	-2.622	0.134	0.195	0.54	0.743	0.461
YKL042W	SPC42	TFIID	TATA-less	3	-1.859	-0.28	-0.189	0.521	0.885	0.765
YPL195W	APL5	TFIID	TATA-less	3	-2.247	-0.078	0.14	1.183	0.721	-0.715
YNL267W	PIK1	TFIID	TATA-less	3	-2.072	-0.13	0.04	0.626	0.833	0.412
YFL004W	VTC2	CR	TATA-less	3	-2.539	-0.208	-0.102	0.602	0.859	0.513
YBR041W	FAT1	TFIID		3	-1.994	-0.128	-0.046	0.395	0.522	0.403
YGR270W	YTA7	TFIID	TATA-less	3	-2.273	-0.067	0.165	0.86	0.488	-0.818
YBR114W	RAD16	TFIID	TATA-containing	3	-1.784	-0.354	-0.18	0.453	0.399	-0.183
YKR101W	SIR1	TFIID		3	-2.36	-0.055	0.173	1.936	0.916	-1.08
YPR159W	KRE6	TFIID	TATA-less	3	-2.206	-0.055	-0.053	0.589	0.53	-0.152
YDR339C	FCF1	TFIID	TATA-less	3	-2.404	0.061	0.14	0.405	0.329	-0.302
YER151C	UBP3	TFIID	TATA-less	3	-1.928	-0.015	-0.034	0.786	0.775	-0.02
YKL057C	NUP120	TFIID	TATA-less	3	-1.78	-0.124	-0.046	0.648	0.96	0.567
YFL038C	YPT1	TFIID	TATA-less	3	-2.169	-0.063	0.124	0.529	0.428	-0.307
YOR094W	ARF3	TFIID	TATA-less	3	-2.75	0.15	0.463	0.221	0.307	0.472
YCR002C	CDC10	TFIID	TATA-less	3	-2.012	-0.232	-0.185	0.974	0.4	-1.282
YMR100W	MUB1	TFIID	TATA-less	3	-2.104	0.043	0.126	0.841	0.201	-2.066
YDR026C	NSI1	TFIID		3	-2.247	-0.051	0.064	0.421	1.241	1.559
YDR068W	DOS2	TFIID	TATA-less	3	-2.436	-0.18	-0.233	0.432	0.579	0.422
YHL020C	OPI1	TFIID	TATA-less	3	-2.259	0.077	0.077	0.581	0.524	-0.149
YGR094W	VAS1	TFIID	TATA-less	3	-2.741	-0.078	-0.067	0.811	0.852	0.071
YDR452W	PPN1	TFIID	TATA-less	3	-2.249	0.182	-0.251	1.071	0.655	-0.71
YPR034W	ARP7	TFIID	TATA-less	3	-2.256	0.059	-0.237	0.433	0.284	-0.607
YIL021W	RPB3	TFIID	TATA-less	3	-1.988	-0.195	-0.088	4.722	3.536	-0.417
YJR122W	IBA57	TFIID	TATA-less	3	-2.064	-0.3	0.094	0.23	0.346	0.59
YLR130C	ZRT2	CR	TATA-less	3	-2.48	-0.053	0.178	0.672	0.429	-0.649
YMR114C	YMR114C	TFIID		3	-2.269	-0.444	-0.084	0.644	0.565	-0.188
YPL210C	SRP72	TFIID	TATA-less	3	-2.288	0.255	0.163	0.35	0.562	0.683
YHR205W	SCH9	TFIID	TATA-less	3	-2.139	0.103	0.134	0.725	0.746	0.041
YBL076C	ILS1	TFIID	TATA-less	3	-2.43	-0.086	0.026	0.667	0.653	-0.031
YAL043C	PTA1	TFIID	TATA-less	3	-2.07	0.177	0.053	0.605	0.726	0.262
[truncated: 2,616 more rows]

## Sheet: 5C
gene_id	gene_name	class	rank	Bur1	Ctk1	Spt5
YJL088W	ARG3	CR	1	0.879432	-0.0363361	-0.0078367
YJL133C-A	YJL133C-A	CR	1	1.0932	0.138651	0.00679031
YNL251C	NRD1	CR	1	0.898733	1.28504	0.589667
YER081W	SER3	CR	1	0.519364	0.935445	0.305721
YNL135C	FPR1	CR	1	1.61924	2.11899	0.952849
YJR009C	TDH2	CR	1	0.35094	0.6838	0.0975393
YGR008C	STF2	CR	1	1.02847	0.572811	0.0773084
YMR194C-B	CMC4	CR	1	0.948467	1.08631	0.6118
YGR254W	ENO1	CR	1	0.392651	0.858099	0.279125
YER067W	RGI1	CR	1	1.58192	1.19623	0.502782
YJL052W	TDH1	CR	1	0.454011	0.374196	0.0225498
YHR018C	ARG4	CR	1	0.511298	0.338178	0.0544883
YKL086W	SRX1	CR	1	0.957834	0.0567491	0.454843
YCL040W	GLK1	CR	1	0.51172	0.746845	0.445334
YMR195W	ICY1	CR	1	0.912211	0.463742	0.195261
YPL250C	ICY2	CR	1	0.784183	-0.0735097	0.056574
YMR251W-A	HOR7	CR	1	0.763134	0.391308	0.191142
YJR109C	CPA2	CR	1	0.560625	0.120005	-0.138128
YPR036W-A	SPO24	CR	1	0.917613	0.515326	0.2045
YER053C	PIC2	CR	1	0.918699	0.16798	-0.278077
YOL058W	ARG1	CR	1	1.18022	0.301025	-0.294923
YPL014W	YPL014W	CR	1	0.572728	0.501739	0.0165813
YML128C	MSC1	CR	1	0.888746	0.0609313	-0.44833
YMR090W	YMR090W	CR	1	1.35757	0.79286	-0.103967
YNL208W	YNL208W	CR	1	0.621108	0.560874	0.0432787
YOR374W	ALD4	CR	1	0.957715	0.528944	0.430829
YDL125C	HNT1	CR	1	0.652592	0.859855	0.186121
YOL086C	ADH1	CR	1	0.427389	0.885489	0.117539
YKL152C	GPM1	CR	1	0.47413	0.995287	0.271582
YNL289W	PCL1	CR	1	0.46598	0.529029	-0.0183843
YML100W	TSL1	CR	1	0.602865	0.734411	0.37077
YGR161W-C	YGR161W-C	TFIID	1	0.503506	0.474044	0.0710663
YFL021W	GAT1	CR	1	0.632809	0.344629	0.27146
YBL064C	PRX1	CR	1	1.27436	0.959745	0.30752
YDR050C	TPI1	CR	1	0.561295	0.802749	0.320223
YOR161C	PNS1	CR	1	0.92592	0.592212	0.170453
YNL030W	HHF2	CR	1	0.877394	0.890083	0.389513
YGR209C	TRX2	CR	1	1.12921	0.817976	0.455473
YOL123W	HRP1	CR	1	1.08556	1.14136	0.597334
YMR062C	ARG7	TFIID	1	0.946807	0.606722	-0.203108
YGL117W	YGL117W	CR	1	1.92751	0.584883	0.270821
YBR230C	OM14	CR	1	1.05613	0.581382	0.325069
YJL151C	SNA3	CR	1	1.11562	1.06113	0.421042
YDL070W	BDF2	CR	1	0.700108	0.762334	0.471612
YER150W	SPI1	CR	1	0.852033	0.941818	-0.0820377
YMR105C	PGM2	CR	1	0.690152	0.616015	0.229958
YDL198C	GGC1	CR	1	0.98643	0.341465	-0.267689
YIL136W	OM45	TFIID	1	0.81923	0.524626	-0.0968296
YDR043C	NRG1	CR	1	0.51015	0.186154	-0.0881087
YER159C	BUR6	CR	1	1.02724	0.84365	0.60937
YCR018C	SRD1	CR	1	0.908117	0.957172	0.54123
YML028W	TSA1	CR	1	0.760319	0.905011	0.29491
YGL224C	SDT1	CR	1	1.3012	0.738779	0.315082
YPL058C	PDR12	CR	1	0.492636	0.497514	-0.224041
YNL031C	HHT2	CR	1	0.599164	0.69229	0.145244
YJR104C	SOD1	CR	1	0.642288	0.526478	0.24401
YER055C	HIS1	CR	1	0.343113	0.290985	-0.210684
YOR052C	TMC1	CR	1	0.99115	0.560137	0.505848
YLR399C	BDF1	CR	1	0.639649	0.827294	0.343452
YGL037C	PNC1	CR	1	0.770934	0.661071	0.324279
YBR009C	HHF1	CR	1	0.590902	0.706416	0.413633
YLR194C	YLR194C	CR	1	0.950911	0.811581	0.103698
YMR122W-A	YMR122W-A	CR	1	1.00252	0.676126	0.232111
YOR247W	SRL1	CR	1	0.507766	0.563689	0.22633
YNL300W	TOS6	CR	1	0.415939	0.494924	-0.0256585
YDR513W	GRX2	CR	1	1.4284	0.853565	0.595235
YDR533C	HSP31	CR	1	1.40734	1.25887	0.43305
YNL301C	RPL18B	CR	1	1.30609	0.938482	0.57031
YBR256C	RIB5	CR	1	1.31351	0.859792	0.253306
YCL025C	AGP1	CR	1	0.759096	0.580512	0.0513835
YCR012W	PGK1	CR	1	0.461977	0.892276	0.23603
YPL265W	DIP5	CR	1	0.658167	0.425066	0.0175976
YLR327C	TMA10	CR	1	1.31885	1.44321	0.238141
YKL060C	FBA1	CR	1	0.485874	0.87086	0.191969
YOL109W	ZEO1	CR	1	0.8006	0.628657	0.409175
YLR044C	PDC1	CR	1	0.474867	0.945156	0.205698
YDR276C	PMP3	CR	1	0.784708	0.86509	0.496847
YBR145W	ADH5	CR	1	1.11886	0.921428	-0.423674
YBL030C	PET9	CR	1	1.3068	1.30778	0.764661
YBL003C	HTA2	CR	1	0.778084	0.647157	0.321955
YPL004C	LSP1	CR	1	0.778252	1.04865	0.346745
YDR353W	TRR1	CR	1	1.00115	0.858497	0.429669
YDR453C	TSA2	CR	1	1.69532	1.47076	0.271856
YGR086C	PIL1	CR	1	0.644723	0.791099	0.312519
YOR382W	FIT2	CR	1	0.766244	0.344143	-0.146794
YLR136C	TIS11	CR	1	0.530713	0.224959	-0.320888
YOR152C	YOR152C	CR	1	0.852759	0.902329	0.121246
YER177W	BMH1	CR	1	0.731193	0.844397	0.415169
YBR088C	POL30	CR	1	0.960203	0.709021	0.332328
YML087C	AIM33	CR	1	2.13377	2.13771	0.532443
YDR155C	CPR1	CR	1	0.903005	1.09857	0.644941
YDL184C	RPL41A	TFIID	1	1.10408	0.825968	0.653616
YHR162W	MPC2	CR	1	0.930156	0.769009	0.261854
YDR073W	SNF11	CR	1	1.1788	1.12664	0.316791
YDL022W	GPD1	CR	1	0.558737	0.582462	0.193929
YIL155C	GUT2	CR	1	0.956246	0.588728	0.10664
YLR304C	ACO1	CR	1	0.436469	0.501338	-0.00801809
YEL034W	HYP2	CR	1	0.915932	1.26927	0.522932
YBR066C	NRG2	CR	1	1.39664	1.41353	0.406617
YEL044W	IES6	TFIID	1	1.93024	1.17438	0.253488
YDL110C	TMA17	CR	1	1.35942	1.20438	0.345391
YHR008C	SOD2	CR	1	0.970726	1.07587	0.347206
YIL051C	MMF1	CR	1	1.02972	0.916868	0.556494
YOR226C	ISU2	CR	1	0.954625	1.02394	0.411828
YLR205C	HMX1	TFIID	1	1.20667	0.566777	-0.574031
YBL002W	HTB2	CR	1	0.509821	0.443817	0.139589
YHR174W	ENO2	CR	1	0.458356	0.885917	0.201859
YDR032C	PST2	CR	1	1.60043	1.02503	0.312646
YGR192C	TDH3	CR	1	0.410947	0.803761	0.188047
YHR137W	ARO9	CR	1	0.781283	0.853468	0.194758
YDL133C-A	RPL41B	TFIID	1	1.4598	0.922253	0.543456
YKR076W	ECM4	CR	1	1.55521	0.666502	0.615375
YOR303W	CPA1	CR	1	0.609467	0.455042	-0.00559686
YDR524C-B	YDR524C-B	CR	1	1.1106	0.853192	0.49887
YNL037C	IDH1	CR	1	0.578782	0.276573	0.0507839
YKL150W	MCR1	CR	1	1.12937	1.08078	0.353734
YJL079C	PRY1	CR	1	0.928822	1.01302	0.429923
YJR048W	CYC1	CR	1	2.01619	1.15407	0.901806
YJL016W	YJL016W	CR	1	0.719912	0.32014	-0.32742
YBR010W	HHT1	CR	1	1.01309	0.853831	0.455834
YPR167C	MET16	TFIID	1	2.19378	1.29437	0.220847
YGR052W	FMP48	CR	1	0.954982	0.0934986	0.499115
YNL036W	NCE103	CR	1	1.48382	0.250205	0.0690415
YOR292C	YOR292C	TFIID	1	1.08137	0.681992	-0.256569
YHR199C	AIM46	CR	1	1.79716	1.3414	0.551957
YAL038W	CDC19	CR	1	0.466107	1.03482	0.253768
YFR053C	HXK1	CR	1	0.773453	0.913978	0.457227
YKL051W	SFK1	CR	1	1.14219	0.458681	0.216649
YER069W	ARG5,6	CR	1	1.08249	0.472219	-0.124172
YIR017C	MET28	CR	1	0.99205	0.297081	-0.331647
YNL231C	PDR16	CR	1	0.869965	0.73431	0.430829
YDR055W	PST1	CR	1	1.01823	0.467949	0.223491
YPL075W	GCR1	CR	1	0.744912	0.581935	0.39793
YHR071W	PCL5	CR	1	0.938462	0.387698	0.291296
YJL191W	RPS14B	CR	1	1.04356	1.01577	0.465104
YAL060W	BDH1	CR	1	0.778914	0.133258	-0.521812
YLL039C	UBI4	CR	1	1.01684	0.827821	0.542579
YPL111W	CAR1	CR	1	1.0335	1.08282	0.329242
YOR062C	YOR062C	CR	1	1.04849	0.810036	0.0974451
YEL060C	PRB1	CR	1	0.715455	0.425301	0.192452
YPL156C	PRM4	CR	1	0.565786	0.333068	0.0549389
YBR126C	TPS1	CR	1	0.417123	0.502005	-0.0664871
YOR136W	IDH2	CR	1	0.585909	0.585569	0.137333
YLR109W	AHP1	CR	1	0.83386	0.773696	0.452552
YCL030C	HIS4	CR	1	1.03091	0.606872	-0.369402
YDL124W	YDL124W	CR	1	0.804762	0.87539	0.263388
YDR380W	ARO10	CR	1	1.87633	1.42925	1.05974
YJL078C	PRY3	CR	1	0.860828	0.619032	0.329647
YMR002W	MIX17	CR	1	0.91057	0.578809	0.475476
YER028C	MIG3	CR	1	1.52443	0.66829	0.368843
YPL135W	ISU1	CR	1	0.525969	0.704418	0.237512
YFR033C	QCR6	CR	1	1.09412	0.648067	0.565762
YMR291W	TDA1	CR	1	0.867001	0.713396	0.212205
YBL033C	RIB1	CR	1	0.886482	0.781355	0.436536
YDL182W	LYS20	CR	1	0.902661	0.858539	0.221639
YLR437C	DIF1	TFIID	1	1.01107	0.671423	0.231815
YNL241C	ZWF1	CR	1	0.683427	0.742224	0.371466
YLL027W	ISA1	CR	1	0.604086	0.446502	-0.0228485
YLR075W	RPL10	CR	1	0.668435	1.1688	0.341774
YGR295C	COS6	CR	1	1.23564	0.463973	0.51659
YML058W	SML1	CR	1	1.22645	1.1446	0.644354
YPL177C	CUP9	CR	1	1.4906	1.01236	0.525308
YOR120W	GCY1	TFIID	1	1.3142	0.921478	-0.0596184
YER035W	EDC2	CR	1	1.09433	1.0046	0.340856
YPR138C	MEP3	CR	1	0.748737	0.953767	0.307375
YKL035W	UGP1	CR	1	0.751712	0.559444	-0.0369964
YDR397C	NCB2	CR	1	1.33315	0.631191	0.412187
YHR097C	YHR097C	TFIID	1	1.34001	0.585554	-0.0808491
YPR149W	NCE102	CR	1	0.813276	0.699595	0.359632
YBR085C-A	YBR085C-A	CR	1	1.09273	0.940387	-0.0242612
YNL055C	POR1	CR	1	1.28225	1.07295	0.643108
YOL151W	GRE2	CR	1	0.831896	0.679815	0.350499
YLR355C	ILV5	CR	1	0.527126	0.906513	0.25734
YOL119C	MCH4	CR	1	1.07183	1.02564	0.0430946
YJL158C	CIS3	CR	1	0.912514	0.939056	0.373977
YNL134C	YNL134C	CR	1	0.802789	0.736145	0.297098
YBR249C	ARO4	CR	1	1.0685	0.215312	-0.0102475
YOR273C	TPO4	CR	1	1.0117	1.02975	0.282515
YLR110C	CCW12	CR	1	0.541558	0.951317	0.315547
YOR375C	GDH1	CR	1	1.00176	1.1361	0.634381
YGL209W	MIG2	CR	1	0.851245	0.577123	0.480567
YDR529C	QCR7	TFIID	1	1.92638	1.25633	1.10138
YDR074W	TPS2	CR	1	0.683612	0.667689	0.0865209
YKL103C	APE1	CR	1	1.34474	0.934628	0.42727
YDL179W	PCL9	CR	1	0.912871	1.13742	0.494133
YEL007W	MIT1	CR	1	0.891676	0.902851	0.493972
YDR158W	HOM2	CR	1	0.668587	0.510479	0.219814
YPL163C	SVS1	CR	1	0.820493	0.667234	0.295156
YLR414C	PUN1	CR	1	0.990326	0.636841	0.508513
YIL121W	QDR2	CR	1	0.966437	0.870258	0.413231
YDR528W	HLR1	CR	1	0.883846	0.421883	0.248316
YDL020C	RPN4	CR	1	1.19038	1.11746	0.70165
YLR258W	GSY2	CR	1	1.05509	0.675379	0.332001
YER070W	RNR1	CR	1	0.638853	0.659016	0.181313
YPR145W	ASN1	CR	1	0.600221	0.950089	0.391313
YMR250W	GAD1	CR	1	1.21973	0.84048	0.270816
YBR157C	ICS2	CR	1	1.12515	0.97444	0.4915
YPR035W	GLN1	CR	1	0.476963	0.569656	0.0150132
YIL053W	GPP1	CR	1	0.703719	0.808451	0.240248
YPL267W	ACM1	CR	1	1.03147	0.84933	0.582243
YDR001C	NTH1	CR	1	0.868306	0.666438	0.26282
YKL087C	CYT2	TFIID	1	2.1613	1.18712	0.78446
YPL189C-A	COA2	TFIID	1	2.13338	1.59622	-0.00495751
YHR104W	GRE3	CR	1	1.46628	0.553077	0.0802016
YGL062W	PYC1	CR	1	0.994664	0.750387	0.13276
YCL026C-B	HBN1	CR	1	0.999781	0.681696	-0.0951283
YMR256C	COX7	TFIID	1	2.18154	1.81368	0.952074
YBL045C	COR1	TFIID	1	1.3827	1.18143	0.912078
YER130C	COM2	CR	1	1.18572	0.783902	0.0417619
YIL111W	COX5B	CR	1	1.54277	1.33916	0.00487671
YLL041C	SDH2	CR	1	1.97446	1.33907	0.959727
YKL085W	MDH1	CR	1	1.46349	1.09346	0.724198
YJL166W	QCR8	TFIID	1	1.85049	1.36971	0.66369
YDR451C	YHP1	CR	1	0.973961	0.85596	0.403535
YBR071W	YBR071W	CR	1	0.890979	0.918608	0.303466
YNR001C	CIT1	CR	1	0.69139	0.75459	0.168976
YLR297W	YLR297W	CR	1	1.87678	1.32062	0.813406
YPR028W	YOP1	CR	1	1.26623	0.385131	0.234935
YDR022C	ATG31	TFIID	1	1.41937	1.57937	-0.18138
YKR013W	PRY2	CR	1	0.660509	0.809425	0.0995144
YJL159W	HSP150	CR	1	0.60681	0.834877	0.180114
YKL096W-A	CWP2	CR	1	0.836355	0.810812	0.408192
YNL104C	LEU4	CR	1	0.88301	0.892535	0.398952
YDR322C-A	TIM11	TFIID	1	2.0455	1.41425	0.880282
YKR077W	MSA2	CR	1	0.807115	0.500393	0.162995
YDL055C	PSA1	CR	1	0.643082	0.715655	0.257522
YHR001W-A	QCR10	TFIID	1	2.80384	1.5885	1.30514
YML091C	RPM2	CR	1	1.60933	1.38091	1.02386
YDL003W	MCD1	CR	1	0.752664	0.66058	0.305342
YKL164C	PIR1	CR	1	0.400494	0.576659	0.0325261
YML052W	SUR7	CR	1	1.0578	0.767077	0.465068
YMR173W	DDR48	CR	1	0.440952	0.136121	0.246179
YDR225W	HTA1	CR	1	0.793181	1.12353	0.451812
YJL026W	RNR2	CR	1	0.810283	0.40203	0.335508
YDR525W-A	SNA2	TFIID	1	1.83511	0.917012	0.53675
YKR052C	MRS4	CR	1	1.08874	0.871322	0.375538
YBR196C	PGI1	CR	1	0.573426	0.775143	0.301889
YDR487C	RIB3	CR	1	1.60824	0.615435	0.138781
YCL064C	CHA1	CR	1	1.00228	1.02678	0.430008
YKR061W	KTR2	CR	1	1.43268	0.778007	0.837164
YBR068C	BAP2	CR	1	0.759666	1.19019	0.386166
YER052C	HOM3	CR	1	0.916911	0.68156	-0.0347175
YMR205C	PFK2	CR	1	0.61021	0.867056	0.373001
YCR005C	CIT2	CR	1	0.377597	0.332823	-0.36494
YGR183C	QCR9	TFIID	1	1.84526	1.07532	0.722122
YBL015W	ACH1	TFIID	1	1.8002	1.3742	0.472992
YPL061W	ALD6	CR	1	0.699357	0.922516	0.29522
YOR264W	DSE3	CR	1	0.986247	0.800984	0.375634
YLR346C	YLR346C	CR	1	1.63444	0.69925	0.413178
YEL017C-A	PMP2	CR	1	1.24068	0.74859	0.464639
YMR070W	MOT3	CR	1	0.984766	0.708379	0.365882
YBR244W	GPX2	CR	1	1.2011	0.415471	0.623628
YDR247W	VHS1	CR	1	0.857119	0.433528	0.000537642
YER175C	TMT1	TFIID	2	1.0451	0.656666	0.372407
YIL108W	YIL108W	CR	1	1.29152	1.11711	0.514771
YAL040C	CLN3	CR	1	0.964758	0.872569	0.298721
YGR161C	RTS3	CR	1	0.917281	0.655583	0.521119
YIL056W	VHR1	CR	1	0.830543	0.679867	0.256095
YHR138C	YHR138C	TFIID	2	1.84701	1.33687	0.874428
YFR032C-A	RPL29	TFIID	1	0.692612	0.515043	0.149546
YFL031W	HAC1	CR	1	0.605375	0.561771	0.323172
YHL040C	ARN1	CR	1	0.897264	0.195581	-0.143907
YMR038C	CCS1	CR	1	1.10571	1.05991	0.583434
YGL012W	ERG4	CR	1	1.21668	0.855055	0.431879
YPR080W	TEF1	CR	1	0.626633	1.03848	0.409337
YML131W	YML131W	CR	1	1.33652	0.764498	0.352418
YDL227C	HO	CR	1	0.839616	0.804149	-0.0113987
YOL011W	PLB3	CR	1	0.601374	0.587247	0.0812524
YPR156C	TPO3	CR	1	0.824862	0.753593	0.358384
YML007W	YAP1	CR	1	1.30888	0.996162	0.45122
YLR027C	AAT2	CR	1	0.743211	0.516012	0.162968
YBR105C	VID24	TFIID	1	1.2985	0.951124	0.553055
YBR139W	YBR139W	CR	1	1.1816	0.708645	0.587706
YDR381W	YRA1	CR	1	0.676984	0.851493	0.33544
YIL116W	HIS5	CR	1	1.71223	1.04063	0.299549
YBR106W	PHO88	TFIID	1	0.939496	1.03674	0.187936
YLR452C	SST2	CR	1	0.833907	0.674437	0.146423
YLR367W	RPS22B	TFIID	1	0.991084	0.879893	0.473796
YKL067W	YNK1	TFIID	1	1.17612	0.751157	0.475278
YCR024C-A	PMP1	CR	1	0.909859	0.767806	0.491551
YDR345C	HXT3	CR	1	1.16703	1.15554	0.718859
YDL127W	PCL2	CR	1	1.27706	0.655054	0.420322
YDL181W	INH1	TFIID	1	1.99588	1.13485	1.33242
YOR222W	ODC2	CR	1	1.43128	1.23657	0.817685
YEL046C	GLY1	CR	1	0.71663	1.13344	0.440816
YOR065W	CYT1	CR	1	1.39022	1.17971	0.637362
YLR225C	YLR225C	CR	1	1.29302	0.965785	0.409259
YGR136W	LSB1	CR	1	1.12554	1.09867	0.37443
YKR093W	PTR2	CR	1	0.79191	0.698948	0.26415
YJR111C	YJR111C	TFIID	1	2.10373	1.34949	0.233776
YLR120C	YPS1	TFIID	1	0.797214	0.471283	-0.00858829
YCL026C-A	FRM2	CR	1	1.55435	0.908384	-0.150933
YER072W	VTC1	CR	1	1.15777	0.947415	0.275291
YNL078W	NIS1	CR	1	1.03395	0.953695	0.477326
YKR066C	CCP1	CR	1	1.30917	1.04225	0.01616
YJR016C	ILV3	CR	1	0.901286	0.972646	0.547946
YBR118W	TEF2	CR	1	0.567928	1.07807	0.372566
YPL256C	CLN2	CR	1	0.787014	0.636204	0.281662
YFL045C	SEC53	TFIID	1	0.942282	0.80886	0.510449
YMR318C	ADH6	CR	1	1.46298	1.0931	0.62352
YNL327W	EGT2	CR	1	0.578568	0.62607	0.243929
YDL025C	RTK1	CR	1	1.79122	1.17521	0.551317
YLR167W	RPS31	TFIID	1	0.768122	0.834717	0.252188
YDR406W	PDR15	CR	1	0.928107	0.782172	0.0966892
YNL052W	COX5A	TFIID	1	2.01917	1.74341	1.33935
YDR497C	ITR1	CR	1	0.997983	0.893618	0.427735
YKL056C	TMA19	CR	1	1.13491	1.16337	0.777731
YPL154C	PEP4	CR	1	1.03057	0.753445	0.284339
YGL157W	ARI1	CR	1	1.09057	0.893724	0.0938527
YKL151C	YKL151C	TFIID	1	1.06075	0.764694	0.558196
YCL043C	PDI1	CR	1	0.807215	0.734623	0.289704
YOL031C	SIL1	TFIID	1	1.16765	0.368742	0.0654963
YGR079W	YGR079W	CR	1	1.33333	0.877938	0.775035
YNR019W	ARE2	CR	1	1.09929	1.05223	0.51533
YOL039W	RPP2A	TFIID	1	0.607126	0.617372	0.0211665
YOR285W	RDL1	TFIID	1	1.3077	1.45241	0.251192
YPL249C-A	RPL36B	TFIID	2	0.580355	0.640677	0.00797741
YHR179W	OYE2	CR	1	0.889959	1.13366	0.217983
YHR094C	HXT1	CR	1	0.916719	1.01374	0.392917
YER062C	GPP2	CR	1	1.00388	1.23127	0.258528
YMR316W	DIA1	CR	1	1.22006	0.866638	-0.214312
YBR008C	FLR1	CR	1	1.70972	1.13353	0.359963
YPR020W	ATP20	TFIID	1	2.69145	1.3969	1.19486
YLR286C	CTS1	CR	1	0.586439	0.859239	0.206779
YBR052C	RFS1	TFIID	1	1.23764	0.473271	0.168191
YNL098C	RAS2	TFIID	1	0.491807	0.636296	-0.268552
YBR162C	TOS1	CR	1	0.668951	0.890493	0.292924
YOR108W	LEU9	TFIID	1	1.06426	0.996621	0.440986
YBR158W	AMN1	CR	1	0.722163	0.7161	0.343249
YCR065W	HCM1	CR	1	0.68849	0.743288	0.165453
YGL030W	RPL30	TFIID	1	0.839162	0.743569	0.200841
YKR071C	DRE2	CR	1	1.52422	1.36921	0.816041
YBL099W	ATP1	TFIID	1	1.05459	1.11415	0.619587
YNL058C	YNL058C	CR	1	1.67237	0.768691	0.701615
YER124C	DSE1	CR	1	0.781851	0.827765	0.417995
YGR108W	CLB1	CR	1	1.15356	0.989664	0.440921
YOR182C	RPS30B	TFIID	1	0.953832	0.712021	0.274279
YBR083W	TEC1	CR	1	0.671315	0.468232	0.190235
YOR344C	TYE7	CR	1	0.537433	0.479749	0.133756
YAL012W	CYS3	CR	1	1.0145	0.98127	0.49923
YGL253W	HXK2	CR	1	0.628554	0.87658	0.402683
YER064C	VHR2	CR	1	0.863642	1.07121	0.505085
YGR109C	CLB6	CR	1	1.08327	0.777835	0.283271
YGR230W	BNS1	TFIID	1	1.93857	1.01425	0.493694
YGR281W	YOR1	CR	1	0.871989	0.988432	0.38125
YNL192W	CHS1	CR	1	0.810543	0.597982	0.209721
YLR179C	YLR179C	CR	1	1.22674	1.18499	0.31209
YDL191W	RPL35A	TFIID	1	0.960429	0.552739	0.189679
YLL012W	YEH1	CR	1	1.20689	0.814594	0.458304
YDR178W	SDH4	TFIID	1	1.60881	0.986103	0.69938
YLR325C	RPL38	TFIID	1	0.812242	0.637252	0.209821
YOR025W	HST3	CR	1	1.1099	1.39351	0.474671
YER042W	MXR1	CR	1	1.65068	1.01188	0.721984
YCR004C	YCP4	TFIID	1	1.39682	1.71026	0.414403
YLR287C-A	RPS30A	CR	1	0.940949	0.940555	0.302419
YBR001C	NTH2	CR	1	1.38491	1.09254	0.637126
YGR180C	RNR4	CR	1	0.802847	0.288983	0.330395
YML116W	ATR1	CR	1	1.32544	0.968861	0.418964
YOR355W	GDS1	TFIID	1	0.984143	0.969224	0.39169
YOR026W	BUB3	CR	1	1.20533	1.30382	0.598891
YOL040C	RPS15	TFIID	1	0.536986	0.612232	0.168706
YDL205C	HEM3	CR	1	1.69493	1.48894	0.674882
YGR055W	MUP1	CR	1	0.720122	0.782505	0.275886
YDR072C	IPT1	CR	1	1.17369	1.079	0.525758
YKL068W-A	YKL068W-A	CR	1	1.48562	1.22777	0.706065
YNL261W	ORC5	TFIID	1	1.67578	1.38246	0.776249
YLR185W	RPL37A	TFIID	1	0.693586	0.755973	0.0880151
YMR199W	CLN1	CR	1	0.795512	0.623431	0.206885
YNL067W	RPL9B	TFIID	1	0.976937	1.20484	0.522534
YGR060W	ERG25	CR	1	1.13204	0.817317	0.521883
YOL007C	CSI2	CR	1	1.05242	0.850577	0.406002
YML004C	GLO1	TFIID	1	1.56571	0.611301	0.336069
YLR300W	EXG1	CR	1	0.847566	1.04697	0.444367
YGL035C	MIG1	TFIID	1	1.15412	0.947587	0.607058
YBR054W	YRO2	CR	1	0.706635	0.444971	0.155611
YLR390W-A	CCW14	CR	1	0.849166	0.57358	0.217034
YDR508C	GNP1	CR	1	0.902023	0.912403	0.439295
YGR014W	MSB2	CR	1	0.768322	0.759551	0.234788
YPR043W	RPL43A	TFIID	1	0.654105	0.811659	0.152243
YDR046C	BAP3	CR	1	0.952049	0.750713	0.295613
YER003C	PMI40	TFIID	1	1.11398	0.95942	0.266921
YKL185W	ASH1	CR	1	1.24478	0.752253	0.421272
YBR016W	YBR016W	TFIID	1	1.14193	0.576931	0.168779
YKL043W	PHD1	CR	1	0.909176	0.663913	0.173049
YDR077W	SED1	CR	1	0.794118	0.903808	0.411852
YDR224C	HTB1	CR	1	1.01704	0.830528	0.519042
YNL244C	SUI1	TFIID	1	1.16538	0.804473	0.578039
YOL059W	GPD2	TFIID	1	0.723235	0.577071	0.0864007
YBR132C	AGP2	CR	1	1.30758	0.81186	0.474802
YDR226W	ADK1	CR	1	1.10189	0.818798	0.383399
YGR234W	YHB1	CR	1	1.3199	1.31131	0.736984
YHR037W	PUT2	CR	1	1.14667	0.559978	0.272378
YLR079W	SIC1	CR	1	1.04967	0.804039	0.349793
YML123C	PHO84	CR	1	0.405621	0.640891	-0.100415
YKL141W	SDH3	TFIID	1	1.45623	0.988021	0.688242
YLR023C	IZH3	TFIID	1	1.25707	0.596264	0.275029
YMR272C	SCS7	CR	1	0.915211	0.834683	0.327131
YJL189W	RPL39	TFIID	1	0.736903	0.558518	0.166694
YDR127W	ARO1	CR	1	0.953415	0.993144	0.234429
YMR136W	GAT2	CR	1	1.30928	0.660149	0.644604
YJR105W	ADO1	TFIID	1	1.22298	0.928788	0.137718
YPL127C	HHO1	CR	1	1.11472	0.79096	0.279747
YGR197C	SNG1	CR	1	1.48604	0.723571	-0.114766
YNL277W	MET2	CR	1	1.11335	0.915545	-0.0451055
YAL003W	EFB1	CR	1	1.11868	1.22394	0.702245
YLR056W	ERG3	CR	1	0.694079	0.708626	0.260435
YDR502C	SAM2	CR	1	0.96521	0.613945	0.0575321
YGR177C	ATF2	CR	1	1.28754	0.928626	0.471531
YOR227W	HER1	CR	1	1.40336	1.45812	0.86721
YJL101C	GSH1	CR	1	0.847264	0.744486	0.437022
YOR201C	MRM1	TFIID	1	0.972015	0.825145	-0.0708113
YLR049C	YLR049C	CR	1	0.949971	0.738698	0.0987553
YLR251W	SYM1	TFIID	1	0.944938	0.436008	0.141656
YLR388W	RPS29A	TFIID	1	0.848728	0.641748	0.196539
YDR418W	RPL12B	TFIID	1	0.952905	0.962231	0.133497
YLR108C	YLR108C	CR	1	1.01426	0.797405	0.523197
YHR128W	FUR1	CR	1	1.6108	1.70384	0.901884
YER044C	ERG28	CR	1	1.86851	1.49463	0.592794
YER056C	FCY2	CR	1	0.964457	0.835344	0.435155
YNL268W	LYP1	TFIID	1	0.904985	0.748795	0.27018
YLL028W	TPO1	CR	1	1.15442	0.911336	0.590947
YHL021C	AIM17	TFIID	1	1.52717	0.741685	0.240632
YCL009C	ILV6	TFIID	1	1.51897	1.12352	0.103413
YBR286W	APE3	CR	1	0.721813	0.824124	0.226666
YLR460C	YLR460C	CR	1	1.62127	0.932644	0.492535
YER145C	FTR1	CR	1	0.325375	0.215604	-0.250674
YGR189C	CRH1	CR	1	0.861853	0.840839	0.267146
YDL061C	RPS29B	TFIID	1	1.01654	0.492958	0.167484
YNR009W	NRM1	CR	1	0.919132	0.914627	0.249274
YLR042C	YLR042C	CR	1	1.52969	0.734062	0.298475
YDR003W	RCR2	TFIID	1	2.16858	1.50066	0.342708
YLR099C	ICT1	TFIID	1	1.15182	0.900805	0.170111
YNL003C	PET8	TFIID	1	1.35242	1.17317	0.308517
YPL081W	RPS9A	TFIID	1	0.967175	1.11756	0.5347
YPR065W	ROX1	CR	1	0.792605	0.783532	0.425451
YNR018W	RCF2	TFIID	1	1.46936	1.57245	0.321872
YIL119C	RPI1	CR	1	1.21975	0.820338	0.565793
YGR041W	BUD9	CR	1	0.907207	0.929896	0.346276
YJL048C	UBX6	CR	1	1.53109	0.719891	0.595799
YPL026C	SKS1	CR	1	1.19458	1.05267	0.567466
YLR395C	COX8	TFIID	2	1.90519	2.08339	0.931086
YHR190W	ERG9	CR	1	1.27799	0.870564	0.464337
YGL189C	RPS26A	TFIID	1	0.742057	0.420384	0.0893669
YBR078W	ECM33	CR	1	0.851117	1.01101	0.311509
YNL066W	SUN4	CR	1	0.910024	0.874017	0.275956
YDL067C	COX9	TFIID	1	2.16225	0.983658	0.891318
YIR035C	YIR035C	TFIID	1	1.5355	0.922189	0.111355
YDL066W	IDP1	CR	1	1.13637	0.964118	0.213135
YGR118W	RPS23A	TFIID	1	0.620595	0.694761	0.0401916
YMR015C	ERG5	CR	1	1.13371	0.834459	0.467917
YPL221W	FLC1	CR	1	1.00487	0.827088	0.35966
YMR102C	YMR102C	CR	1	0.909383	0.769519	0.323943
YNL180C	RHO5	CR	1	1.01458	0.764262	0.178793
YOR234C	RPL33B	TFIID	2	0.402063	0.598842	0.0639106
YKL201C	MNN4	TFIID	1	0.863461	0.797169	0.249632
YDL183C	YDL183C	CR	1	1.74206	0.728642	0.0417882
YDL130W-A	STF1	TFIID	2	1.32019	1.02307	0.101086
YCL035C	GRX1	TFIID	1	1.21304	1.05125	0.419581
YCR031C	RPS14A	TFIID	1	0.885369	0.872749	0.251595
YOR063W	RPL3	CR	1	0.840635	1.01511	0.498085
YDL081C	RPP1A	TFIID	1	0.93748	0.825557	0.404421
YBR218C	PYC2	CR	1	1.16288	0.94142	0.573208
YHL048W	COS8	TFIID	1	1.25119	0.933142	0.139463
YJL034W	KAR2	CR	1	0.668485	1.11763	0.509791
YNL046W	YNL046W	CR	1	1.49837	1.00856	0.388898
YDR222W	YDR222W	CR	1	1.45243	0.761547	0.388635
YMR145C	NDE1	CR	1	1.04119	1.08971	0.495663
YER073W	ALD5	CR	1	1.00008	1.00901	0.492109
YJL136C	RPS21B	TFIID	2	0.64174	0.292257	-0.0449367
YHL036W	MUP3	CR	1	1.43022	0.924176	0.277423
YHR051W	COX6	TFIID	1	1.71348	1.61645	1.13147
YNL239W	LAP3	CR	2	1.85992	1.45513	0.433817
YLR061W	RPL22A	TFIID	1	0.739144	0.419065	0.0966942
YML130C	ERO1	CR	1	1.07295	0.359654	0.289669
YGR146C	ECL1	CR	1	1.41706	0.757989	0.596684
YEL071W	DLD3	CR	1	0.610199	0.434488	-0.111867
YDL075W	RPL31A	TFIID	1	0.909736	0.576392	0.248776
YGL135W	RPL1B	TFIID	1	0.892344	0.77922	0.146165
YHR092C	HXT4	CR	1	1.36643	1.2948	0.624972
YPR191W	QCR2	TFIID	1	1.66737	1.158	0.864516
YER020W	GPA2	TFIID	1	1.49489	1.1413	0.301321
YOR081C	TGL5	CR	1	1.07921	0.906304	0.215213
YPL170W	DAP1	TFIID	1	1.66677	1.08669	0.307429
YOR107W	RGS2	CR	1	0.994579	1.09648	0.719658
YGR044C	RME1	CR	1	1.25595	1.05338	0.4041
YHR143W	DSE2	CR	1	0.789721	0.621579	0.245632
YDR171W	HSP42	CR	1	0.922415	0.763437	0.818779
YKL029C	MAE1	TFIID	1	0.885049	0.572217	0.0151722
YHL033C	RPL8A	TFIID	1	0.567468	0.793992	0.194069
YEL040W	UTR2	CR	1	0.861498	0.895656	0.464729
YGL059W	PKP2	TFIID	1	1.71296	0.623411	0.274698
YDR033W	MRH1	CR	1	0.783207	0.920372	0.396544
YDR054C	CDC34	TFIID	1	0.933366	0.591238	0.0706671
YPL092W	SSU1	CR	1	1.8677	1.07562	0.428473
YGR154C	GTO1	TFIID	1	1.86909	1.06417	0.573321
YGL114W	YGL114W	CR	1	1.30505	1.26012	0.308202
YMR058W	FET3	CR	1	0.125619	0.18351	-0.236455
YGR279C	SCW4	CR	1	0.889464	1.0605	0.499332
YDL130W	RPP1B	TFIID	1	0.925141	0.723375	0.161926
YJR123W	RPS5	TFIID	1	0.642397	0.618918	0.0998418
YGL187C	COX4	TFIID	1	1.98162	1.49934	1.15974
YGL028C	SCW11	CR	1	0.645916	0.570589	0.157096
YLR354C	TAL1	CR	1	1.37152	0.893102	0.24397
YCR102C	YCR102C	CR	1	0.955111	0.654255	0.0697098
YOR230W	WTM1	CR	1	1.07353	0.777789	0.306095
YER019C-A	SBH2	TFIID	1	1.3894	1.14687	0.409109
YPL158C	AIM44	CR	1	0.871364	0.857693	0.270737
YKL054C	DEF1	CR	1	0.954099	0.888868	0.362149
YDR064W	RPS13	TFIID	1	0.801016	0.654746	0.182599
YDR432W	NPL3	TFIID	1	0.794823	0.996704	0.526078
YKL178C	STE3	CR	1	0.782247	0.621016	0.0711439
YKR042W	UTH1	CR	1	0.787771	0.931742	0.464208
YGL225W	VRG4	TFIID	1	0.958117	0.988607	0.228178
YML008C	ERG6	CR	1	1.15899	0.785687	0.497722
YNL173C	MDG1	CR	1	1.67594	0.764411	0.261018
YPL016W	SWI1	TFIID	1	0.72475	0.316902	0.0259337
YKL109W	HAP4	CR	1	1.12969	1.05671	0.619116
YKL001C	MET14	TFIID	1	2.46506	1.22033	0.360937
YBR048W	RPS11B	CR	1	0.864747	0.646548	0.0838763
YMR196W	YMR196W	TFIID	1	1.24393	0.930085	0.2856
YMR011W	HXT2	CR	1	0.881607	1.07572	0.389896
YPL091W	GLR1	CR	1	1.30182	1.17724	0.432955
YJL177W	RPL17B	TFIID	1	0.781567	0.632496	0.0596486
YGR240C	PFK1	CR	1	0.723194	0.956568	0.429901
YDR210W	YDR210W	CR	1	1.65476	0.730469	0.952197
YHR122W	CIA2	TFIID	2	1.55046	0.941479	0.177394
YJR077C	MIR1	TFIID	1	1.225	1.20382	0.745048
YGL147C	RPL9A	TFIID	1	0.85081	0.59395	0.187808
YDR399W	HPT1	CR	1	1.08608	1.12424	0.69991
YLR177W	YLR177W	CR	1	1.13602	0.81669	-0.0885984
YDR481C	PHO8	TFIID	1	1.25128	0.871778	-0.00139975
YML027W	YOX1	CR	1	0.814257	0.923702	0.24794
YOR369C	RPS12	TFIID	1	0.747472	0.749399	0.370822
YHR203C	RPS4B	TFIID	1	0.628153	0.432721	0.0937028
YPR010C-A	YPR010C-A	TFIID	2	2.85167	1.80956	0.847431
YPL271W	ATP15	TFIID	1	2.18716	2.22126	1.26313
YLR029C	RPL15A	TFIID	1	0.755988	0.804285	0.333384
YLR295C	ATP14	TFIID	1	1.24891	1.16786	0.66815
YDR253C	MET32	TFIID	1	2.40526	1.70265	0.643558
YLR094C	GIS3	TFIID	1	0.93385	0.995047	0.366937
YKL008C	LAC1	CR	1	1.09343	0.603555	0.25222
YML081C-A	ATP18	TFIID	1	2.04345	1.25421	0.713029
YOR198C	BFR1	TFIID	1	0.744315	0.689556	0.234367
YJR147W	HMS2	CR	1	0.991456	1.24477	0.489003
YGR244C	LSC2	TFIID	1	1.27081	0.614512	0.335513
YKL182W	FAS1	CR	1	0.964456	1.09813	0.624507
YJL144W	YJL144W	CR	1	1.36106	1.0732	0.283443
YEL026W	SNU13	TFIID	1	1.36038	1.08065	0.452911
YNL260C	LTO1	CR	2	1.8002	0.793835	0.836062
YKL125W	RRN3	CR	1	1.33284	0.928605	0.605637
YER001W	MNN1	CR	1	1.3707	1.13868	0.503605
YNL162W	RPL42A	TFIID	2	0.604062	0.714605	0.0531158
YHR005C	GPA1	TFIID	1	0.746736	0.363023	0.275546
YKL016C	ATP7	TFIID	1	1.74565	1.50135	0.909074
YDR035W	ARO3	TFIID	1	1.01273	0.24402	0.0516474
YMR181C	YMR181C	CR	1	1.56557	1.42653	0.699876
YBR082C	UBC4	TFIID	1	1.14242	0.88618	0.41049
YDR025W	RPS11A	TFIID	1	0.721437	0.700826	0.0456797
YGL123W	RPS2	TFIID	1	0.540886	0.598099	0.102821
YJR121W	ATP2	CR	1	1.30033	1.54963	0.863692
YBR162W-A	YSY6	TFIID	2	1.93274	1.11617	0.478338
YJL172W	CPS1	TFIID	1	1.28044	0.605862	0.07585
YHR141C	RPL42B	TFIID	1	0.842052	0.483713	0.189321
YLR406C	RPL31B	TFIID	2	0.812902	0.524207	0.164687
YOR315W	SFG1	CR	1	1.03021	0.898601	0.546968
YML024W	RPS17A	TFIID	1	1.02911	0.554712	0.0464191
YJR094W-A	RPL43B	TFIID	1	0.862866	0.660597	0.196644
YKL156W	RPS27A	TFIID	1	0.994813	0.584157	0.323625
YNL024C	YNL024C	TFIID	1	1.98949	1.00788	0.414079
YDR037W	KRS1	CR	1	1.14343	0.891158	0.366808
YDL168W	SFA1	CR	1	1.32694	0.748399	0.438883
YBR031W	RPL4A	TFIID	1	0.960348	1.28399	0.651319
YER148W	SPT15	TFIID	1	1.43574	1.13776	0.519202
YOR043W	WHI2	TFIID	1	1.2428	0.798923	0.231828
YKL091C	YKL091C	TFIID	2	1.47512	1.00938	-0.215653
YOR293W	RPS10A	TFIID	2	0.810105	0.465734	0.201907
YOL019W	YOL019W	CR	1	1.10596	0.88552	0.312504
YBL087C	RPL23A	TFIID	2	1.06618	0.67444	0.204937
YOR153W	PDR5	CR	1	0.644888	0.889168	0.250655
YDL045W-A	MRP10	TFIID	2	1.98437	0.894114	0.465857
YJL171C	YJL171C	CR	1	1.64545	1.23931	0.375954
YEL009C	GCN4	CR	1	0.929921	0.93248	0.563529
YGR117C	YGR117C	TFIID	2	1.43508	1.00258	0.210915
YJR127C	RSF2	CR	1	1.14337	0.913445	0.332055
YMR006C	PLB2	CR	1	1.85771	1.14236	0.890334
YJL157C	FAR1	CR	1	0.976466	0.777471	0.392265
YPR102C	RPL11A	TFIID	1	1.00299	0.729116	0.163301
YPL019C	VTC3	CR	1	0.540101	0.515305	0.030799
YKL101W	HSL1	CR	1	0.679904	0.569259	0.229453
YMR226C	YMR226C	CR	1	0.987438	0.799129	0.0565792
YMR171C	EAR1	TFIID	1	1.04993	1.09547	0.350506
YHL015W	RPS20	TFIID	1	0.628953	0.494468	0.154551
YDR377W	ATP17	TFIID	1	2.06934	1.78496	1.39863
YJL167W	ERG20	CR	1	1.68352	1.13577	0.53384
YIL117C	PRM5	CR	1	1.45114	0.926154	0.0980342
YCL027W	FUS1	CR	1	0.985205	0.468418	0.05045
YMR315W	YMR315W	TFIID	2	1.44423	1.01564	0.238827
YPL131W	RPL5	TFIID	1	0.727072	0.912864	0.260919
YHR021C	RPS27B	TFIID	1	0.723375	0.385299	0.144982
YNR067C	DSE4	CR	1	0.78838	0.621271	0.296704
YGR027C	RPS25A	TFIID	1	0.864432	0.727928	0.244974
YLR350W	ORM2	TFIID	1	0.820957	0.432909	0.025022
YGR169C-A	LSO2	TFIID	1	1.29427	0.663562	0.548865
YER074W	RPS24A	TFIID	2	0.53803	0.318013	0.00192376
YBR177C	EHT1	CR	1	1.10572	0.711297	-0.0242471
YLR257W	YLR257W	TFIID	1	0.81964	0.69946	0.316077
YBL092W	RPL32	TFIID	1	0.717995	0.602091	0.0501719
YOR298C-A	MBF1	CR	1	1.02844	1.01287	0.809268
YDR471W	RPL27B	TFIID	2	0.745473	0.592659	0.057548
YCL055W	KAR4	CR	1	1.0301	0.684868	-0.181195
YDR085C	AFR1	TFIID	1	1.38881	1.00441	-0.12926
YNL178W	RPS3	TFIID	1	0.888573	0.780019	0.331885
YDR501W	PLM2	TFIID	1	0.80461	0.585079	0.00347669
YIL148W	RPL40A	TFIID	1	0.693697	0.486908	-0.000634267
YDR510W	SMT3	TFIID	2	1.33178	0.480606	-0.0771049
YMR142C	RPL13B	TFIID	1	0.569915	0.444124	0.00683503
YDR135C	YCF1	CR	1	1.0329	1.07169	0.406691
YBR046C	ZTA1	CR	2	1.93391	1.46127	0.270002
YPL090C	RPS6A	TFIID	2	0.661375	0.71847	0.0790044
YHL001W	RPL14B	TFIID	2	1.10522	0.445817	0.120234
YGL038C	OCH1	CR	1	1.1892	1.17038	0.628439
YKL040C	NFU1	CR	2	1.81383	1.68445	0.468123
YBR161W	CSH1	TFIID	1	1.20523	0.984335	0.424177
YLR038C	COX12	TFIID	1	2.37467	1.14155	1.01949
YDR011W	SNQ2	CR	1	0.928958	0.983827	0.593578
YER091C	MET6	CR	1	0.915256	0.502803	0.0394373
YPR113W	PIS1	CR	1	1.46298	1.10794	0.257842
YPR074C	TKL1	TFIID	1	1.03606	1.30007	0.718112
YKL006W	RPL14A	TFIID	2	0.776329	0.577453	0.0103047
YPR106W	ISR1	CR	1	1.34732	0.726356	0.254702
YPL143W	RPL33A	TFIID	1	0.72801	0.407665	0.0597293
YDR186C	YDR186C	TFIID	1	0.882744	0.788031	0.265723
YHR049W	FSH1	CR	1	1.81673	1.6175	0.922917
YMR108W	ILV2	TFIID	1	1.12509	0.967727	0.666842
YDR174W	HMO1	TFIID	1	1.18764	0.480365	0.0496457
YKR046C	PET10	TFIID	1	2.07732	1.42899	0.303807
YPR119W	CLB2	CR	1	1.29206	0.921355	0.595455
YBL072C	RPS8A	TFIID	1	0.547348	0.789044	0.196637
YOL121C	RPS19A	TFIID	2	0.90676	0.976298	0.313787
YIR034C	LYS1	TFIID	1	1.58423	0.968313	0.314136
YDL180W	YDL180W	CR	1	1.46181	0.588977	0.411896
YGL162W	SUT1	TFIID	2	1.41894	1.06559	0.193857
YJR059W	PTK2	CR	1	0.664747	0.621621	-0.0752633
YLR441C	RPS1A	TFIID	1	0.668117	0.814733	0.133643
YIL123W	SIM1	CR	1	0.813909	0.689172	0.145645
YEL063C	CAN1	TFIID	1	1.13248	0.793701	0.263743
YIL052C	RPL34B	TFIID	2	0.7902	0.789289	0.121033
YPR120C	CLB5	TFIID	1	1.28007	0.433592	0.0504194
YDR354W	TRP4	TFIID	1	1.76162	1.41476	0.398354
YLR244C	MAP1	TFIID	1	1.05797	1.09499	0.400091
YNL176C	TDA7	CR	1	2.21237	1.44345	0.633657
YEL072W	RMD6	TFIID	2	2.20529	1.37113	0.774253
YMR307W	GAS1	CR	1	0.882557	1.06585	0.465062
YNL220W	ADE12	TFIID	2	1.59246	1.55539	0.537138
YPL087W	YDC1	TFIID	2	1.6215	0.833529	-0.185838
YDL136W	RPL35B	TFIID	2	0.876981	0.475116	0.0607298
YBR149W	ARA1	CR	1	1.37634	1.06552	0.215306
YPL078C	ATP4	TFIID	1	1.92315	1.22464	0.840142
YPR127W	YPR127W	TFIID	1	2.03667	1.63706	0.206747
YPR132W	RPS23B	TFIID	2	0.605096	0.507255	0.0948346
YGL008C	PMA1	CR	1	0.642967	0.949209	0.307461
YOL147C	PEX11	TFIID	1	1.72454	0.410751	0.209244
YPR086W	SUA7	TFIID	1	1.4915	1.16797	0.456585
YDR148C	KGD2	TFIID	1	1.63593	1.43975	0.764469
YBL027W	RPL19B	TFIID	1	0.57726	0.303285	0.0961535
YDR309C	GIC2	CR	1	0.840001	0.545337	0.160452
YNR016C	ACC1	CR	1	1.11942	1.29048	0.728548
YOL136C	PFK27	CR	1	1.43518	1.07405	0.545989
YNL217W	YNL217W	CR	1	1.40569	0.870316	0.372428
YEL054C	RPL12A	TFIID	1	0.641077	0.562203	0.0593846
YDR447C	RPS17B	TFIID	2	0.78605	0.696726	0.206832
YER102W	RPS8B	TFIID	2	0.579233	0.48976	-0.00294438
YOR212W	STE4	TFIID	1	1.10835	0.754155	0.389402
YPR002W	PDH1	CR	1	1.84147	1.32417	0.296012
YNL213C	RRG9	TFIID	2	2.16935	1.46186	0.496442
YPR009W	SUT2	TFIID	1	1.4398	1.29016	0.421805
YGR037C	ACB1	TFIID	1	1.3301	1.0453	0.656622
YER048W-A	ISD11	TFIID	2	1.86286	0.670544	0.430852
YBL093C	ROX3	TFIID	2	1.65171	1.22103	0.31049
YIL069C	RPS24B	TFIID	2	0.645331	0.508268	0.0410556
YDR500C	RPL37B	TFIID	1	0.792983	0.847586	0.120619
YLR256W	HAP1	CR	1	0.882145	0.962631	0.564791
YER089C	PTC2	TFIID	1	1.20455	0.947828	0.244718
YKL142W	MRP8	TFIID	1	0.913188	0.494769	-0.0290492
YOR289W	YOR289W	TFIID	2	1.63641	1.26713	0.0258805
YJR086W	STE18	TFIID	2	1.8991	1.657	0.597295
YML026C	RPS18B	TFIID	2	0.927567	0.448421	0.0369963
YML059C	NTE1	TFIID	1	1.24995	1.18886	0.520584
YLR293C	GSP1	TFIID	1	1.29971	0.859537	0.421287
YOR096W	RPS7A	TFIID	1	0.83073	0.590809	0.109408
YOR370C	MRS6	TFIID	1	1.30023	1.21799	0.51197
YDL170W	UGA3	CR	1	1.81728	1.25557	0.349429
YOL126C	MDH2	CR	1	1.48278	1.7296	0.64232
YDR173C	ARG82	CR	1	1.48295	0.943046	0.48856
YOR122C	PFY1	TFIID	1	1.50437	0.520353	0.285499
YIL133C	RPL16A	TFIID	2	0.776994	0.494751	0.0804963
YLR153C	ACS2	CR	1	1.00231	1.04486	0.531614
YMR305C	SCW10	CR	1	0.582333	0.639971	0.289002
YJL118W	YJL118W	TFIID	2	1.91234	1.51604	0.282617
YLL058W	YLL058W	TFIID	2	1.83146	1.08446	0.529247
YGR157W	CHO2	CR	1	1.49565	1.14789	0.769673
YKL148C	SDH1	TFIID	2	2.32194	1.77439	1.05625
YJR137C	MET5	TFIID	1	1.52281	1.15019	0.0729656
YJL060W	BNA3	TFIID	2	1.67157	0.644393	0.138319
YKL120W	OAC1	CR	1	1.26227	1.30019	0.89947
YER056C-A	RPL34A	TFIID	2	0.731206	0.600713	0.132704
YOR142W	LSC1	CR	1	1.30745	0.847449	0.408599
YBR011C	IPP1	TFIID	1	0.956484	0.786421	0.369751
YJL190C	RPS22A	TFIID	2	0.897358	1.14834	0.23762
YPL049C	DIG1	CR	1	0.8124	0.974952	0.140576
YGR282C	BGL2	TFIID	1	1.0422	0.855217	0.14181
YJR045C	SSC1	CR	1	0.788682	1.07173	0.595972
YOR047C	STD1	CR	1	0.957919	0.847149	0.411025
YOR187W	TUF1	TFIID	1	1.0102	0.64627	0.333165
YLR299W	ECM38	CR	1	2.05204	1.28293	0.804945
YHR046C	INM1	CR	1	1.50478	1.18537	0.170193
YKL081W	TEF4	CR	1	1.10881	1.18388	0.661511
YER117W	RPL23B	TFIID	1	0.693309	0.330124	0.138309
YGL077C	HNM1	CR	1	1.18083	0.847858	0.320477
YBR181C	RPS6B	TFIID	2	0.842279	0.856978	0.191808
YFL034C-A	RPL22B	TFIID	2	0.875185	0.54073	0.00291302
YLR432W	IMD3	CR	1	1.45055	1.35637	0.897956
YML048W	GSF2	CR	1	1.42797	1.03055	0.573827
YGR085C	RPL11B	TFIID	2	1.0928	1.01075	0.225604
YOR167C	RPS28A	TFIID	2	1.31994	1.13782	0.586481
YDL171C	GLT1	TFIID	1	1.27471	1.13798	0.537991
YLR249W	YEF3	CR	1	0.875355	1.23195	0.589736
YHR029C	YHI9	TFIID	1	2.00394	1.28873	0.203403
YER088C	DOT6	TFIID	1	0.97158	0.673408	0.142442
YHR216W	IMD2	CR	1	1.32696	1.02296	0.723371
YPR048W	TAH18	TFIID	2	1.97029	1.56581	0.601582
YHL035C	VMR1	CR	1	1.32659	0.688512	-0.0671596
YDR382W	RPP2B	TFIID	1	1.00112	0.797135	0.372642
YPR005C	HAL1	CR	1	1.81038	0.688617	0.0638334
YGR034W	RPL26B	TFIID	1	0.60754	0.780151	0.186101
YOL120C	RPL18A	TFIID	2	1.12109	0.74403	0.232528
YDR002W	YRB1	TFIID	1	1.1512	0.927529	0.369761
YOR342C	YOR342C	TFIID	1	1.20855	0.58159	0.262287
YOR267C	HRK1	TFIID	1	1.15662	0.844865	0.203122
YOR184W	SER1	CR	1	1.10382	1.04356	0.143253
YPL117C	IDI1	TFIID	1	1.33065	0.580553	0.436531
YGR250C	YGR250C	CR	1	1.41729	0.972079	0.311757
YPL066W	RGL1	TFIID	1	1.21547	1.06191	0.303958
YDR492W	IZH1	CR	1	1.57175	1.40231	0.82339
YJL082W	IML2	CR	1	1.10614	0.696132	0.112058
YLR372W	ELO3	TFIID	1	0.748425	0.905198	0.369142
YLR180W	SAM1	CR	1	0.890793	0.972885	0.426815
YJL057C	IKS1	TFIID	1	1.9567	1.28496	-0.122477
YDL029W	ARP2	CR	2	1.73771	1.68439	0.433878
YJR145C	RPS4A	TFIID	2	0.767777	0.528043	0.0670394
YPL082C	MOT1	CR	1	0.880072	0.921268	0.328701
YNL125C	ESBP6	TFIID	1	1.35145	0.733724	0.592385
YJR010W	MET3	TFIID	2	2.39964	1.77587	0.457732
YDR233C	RTN1	TFIID	1	1.05136	1.1932	0.486158
YJL194W	CDC6	CR	1	1.06812	0.852268	0.375873
YNL302C	RPS19B	TFIID	2	0.735762	0.543445	0.103023
YLR264W	RPS28B	TFIID	2	1.55495	1.40095	0.348467
YJR025C	BNA1	TFIID	2	1.62763	0.97947	0.166986
YEL047C	FRD1	TFIID	1	1.53628	0.77366	0.341605
YLR250W	SSP120	TFIID	2	2.09887	1.42348	0.542718
YDR368W	YPR1	TFIID	2	1.81707	1.40544	0.303234
YFL039C	ACT1	TFIID	1	0.83758	0.93675	0.439614
YML063W	RPS1B	TFIID	2	0.747826	0.476571	0.0254897
YLR344W	RPL26A	TFIID	2	0.923725	0.63032	0.200231
YDR270W	CCC2	CR	1	1.04254	0.541923	0.00881661
YMR043W	MCM1	CR	1	0.968933	0.81167	0.269025
YGL055W	OLE1	CR	1	1.49848	1.60303	0.966937
YOR130C	ORT1	TFIID	2	1.5034	0.952895	0.0385476
YDR232W	HEM1	TFIID	1	1.16942	0.750334	0.328975
YBR005W	RCR1	TFIID	2	1.93642	0.73116	0.492385
YOL113W	SKM1	TFIID	2	1.78096	1.2597	0.228674
YMR001C	CDC5	TFIID	1	1.0967	0.856196	0.516106
YJL130C	URA2	CR	1	0.968305	0.731788	0.263736
YGL116W	CDC20	CR	1	1.271	0.962686	0.359719
YLR100W	ERG27	TFIID	2	1.40674	1.05646	0.512657
YDR385W	EFT2	TFIID	1	0.864192	0.993469	0.247048
YOR317W	FAA1	TFIID	1	1.04859	0.770963	0.306403
YDL146W	LDB17	TFIID	1	1.30186	0.945803	0.0445648
YMR246W	FAA4	CR	1	1.60132	1.5549	1.08829
YKR094C	RPL40B	TFIID	1	0.84259	0.667116	0.260123
YNL065W	AQR1	CR	1	1.69137	0.986276	0.972158
YMR179W	SPT21	TFIID	1	1.11522	0.701861	0.302125
YPL274W	SAM3	CR	1	1.30976	0.728416	0.554627
YHR183W	GND1	CR	1	1.1619	1.26995	0.660676
YOL030W	GAS5	CR	1	1.07758	1.02455	0.596378
YBR238C	YBR238C	TFIID	1	1.13201	0.969483	0.486552
YLR064W	PER33	CR	1	1.40324	0.921821	0.487758
YKL180W	RPL17A	TFIID	2	0.745607	0.815002	0.113108
YKL104C	GFA1	TFIID	1	0.935499	0.810627	0.35156
YGR155W	CYS4	CR	1	1.22191	1.41096	0.724179
YJL196C	ELO1	CR	1	1.77022	1.09912	0.330011
YLL055W	YCT1	CR	2	2.17372	1.35583	0.129294
YOL127W	RPL25	TFIID	2	0.70386	0.615957	0.191169
YER131W	RPS26B	TFIID	2	0.727779	0.648111	0.174937
YGL103W	RPL28	TFIID	1	0.595769	0.900552	0.209973
YIL122W	POG1	TFIID	1	1.02258	0.402865	0.161169
YDR450W	RPS18A	TFIID	1	0.775615	0.756558	0.121756
YBR084C-A	RPL19A	TFIID	2	0.641589	0.43682	0.0306203
YDR069C	DOA4	CR	1	1.75522	1.04737	0.345534
YGR070W	ROM1	TFIID	1	1.52969	0.999413	0.436786
YDR005C	MAF1	TFIID	1	1.45622	0.64546	0.469599
YKR060W	UTP30	CR	1	1.59118	1.07537	0.782012
YOR312C	RPL20B	TFIID	1	0.825188	0.727105	0.0842264
YOR018W	ROD1	CR	1	1.481	1.2871	0.457715
YNL069C	RPL16B	TFIID	2	0.724286	0.821912	0.0633772
YLR040C	AFB1	CR	1	1.05831	0.7599	0.361163
YER095W	RAD51	TFIID	2	1.14325	1.01784	0.196244
YNL096C	RPS7B	TFIID	2	0.891117	0.658065	0.083509
YOR092W	ECM3	TFIID	1	0.96492	0.904263	-0.807862
YLR342W	FKS1	CR	1	0.794901	0.87615	0.31301
YLL009C	COX17	TFIID	2	1.81906	1.10254	0.544783
YCL057C-A	MIC10	TFIID	2	2.05516	1.21627	0.598199
YFR006W	YFR006W	TFIID	1	1.40593	1.18461	0.401741
YGR239C	PEX21	CR	2	2.18585	1.80689	0.541572
YPL231W	FAS2	CR	1	1.16075	1.25415	0.773936
YNL112W	DBP2	TFIID	1	1.2155	0.898927	0.649603
YHR010W	RPL27A	TFIID	2	0.719942	0.638434	0.113634
YIL018W	RPL2B	TFIID	2	0.57477	0.559279	-0.0233304
YMR266W	RSN1	CR	1	1.18075	0.820996	0.352412
YBR006W	UGA2	TFIID	1	2.09945	1.38608	0.313556
YLR034C	SMF3	CR	1	0.671021	0.465793	-0.0964071
YNR074C	AIF1	CR	2	1.90977	1.35877	0.432078
YDL117W	CYK3	CR	1	1.16304	0.83681	0.385725
YMR031C	EIS1	CR	1	0.865605	0.86989	0.323033
YIL074C	SER33	TFIID	2	1.69898	1.02725	0.50022
YBR243C	ALG7	CR	2	1.96564	1.38725	0.352137
YOL111C	MDY2	TFIID	2	1.10786	0.315941	-0.0278994
YJL115W	ASF1	TFIID	2	0.962771	0.632522	-0.0702327
YBL016W	FUS3	TFIID	2	1.5482	0.892701	0.0873729
YBR222C	PCS60	TFIID	1	1.32602	1.04675	0.385771
YOR137C	SIA1	TFIID	1	1.06669	0.392661	-0.00845552
YDL157C	YDL157C	TFIID	2	2.35471	1.83219	0.572334
YDR195W	REF2	CR	1	1.48431	1.1291	0.44547
YKL110C	KTI12	TFIID	1	1.51016	1.37173	0.379531
YML073C	RPL6A	TFIID	1	0.981433	0.572285	0.107319
YPL198W	RPL7B	CR	1	1.08533	0.840298	0.331075
YBL042C	FUI1	TFIID	1	1.36562	0.940432	0.315635
YPR159W	KRE6	TFIID	1	0.988331	1.05094	0.192419
YML119W	YML119W	TFIID	1	1.60775	0.745423	0.45833
YGR143W	SKN1	TFIID	1	1.31213	0.889891	0.19576
YDL082W	RPL13A	TFIID	2	1.00355	0.529545	0.223472
YOR204W	DED1	CR	1	0.819598	0.932319	0.483093
YBR201C-A	YBR201C-A	TFIID	2	1.7515	1.53227	0.506231
YIR038C	GTT1	TFIID	2	1.60082	1.10255	0.326458
YKL106W	AAT1	TFIID	1	1.49793	0.89522	0.334115
YDL083C	RPS16B	TFIID	2	0.881454	0.481004	0.0478486
YGL202W	ARO8	TFIID	1	1.41351	0.777131	0.180501
YBR252W	DUT1	TFIID	2	1.84937	1.37642	0.101103
YOR220W	RCN2	TFIID	2	1.52444	1.12065	0.190069
YIL140W	AXL2	TFIID	1	1.20131	0.610881	0.200599
YLR403W	SFP1	TFIID	1	0.968406	0.837002	0.27447
YFR031C-A	RPL2A	TFIID	2	0.729211	0.821623	-0.0324499
YBL069W	AST1	TFIID	2	1.78583	0.858643	0.0281528
YHR208W	BAT1	TFIID	1	1.36322	1.27136	0.821876
YJR073C	OPI3	CR	1	1.72378	1.61253	0.312339
YOR066W	MSA1	TFIID	1	1.12193	0.900332	0.372937
YJR148W	BAT2	CR	1	1.83055	1.48339	1.16525
YMR194W	RPL36A	TFIID	2	0.874916	0.474014	0.209171
YDR262W	YDR262W	TFIID	2	1.15075	0.534626	0.225224
YGR134W	CAF130	TFIID	2	2.18266	1.80597	0.699213
YLR254C	NDL1	TFIID	1	1.82928	1.30242	0.913816
YOL020W	TAT2	TFIID	1	1.11078	1.05359	0.395104
YDR507C	GIN4	TFIID	1	0.924234	0.591693	0.227533
YMR032W	HOF1	TFIID	1	1.77213	1.06381	0.642306
YJL164C	TPK1	TFIID	2	1.56719	1.19007	0.103663
YJL100W	LSB6	TFIID	2	1.92663	1.14951	0.346372
YGR032W	GSC2	TFIID	1	1.32964	0.813829	0.231575
YMR230W	RPS10B	TFIID	2	0.974031	0.614207	-0.0301457
YJL012C	VTC4	CR	1	0.990845	0.648025	0.189319
YPL015C	HST2	TFIID	1	1.34328	0.897718	0.11161
YLR183C	TOS4	TFIID	1	0.755347	0.732057	-0.0929892
YMR116C	ASC1	TFIID	1	1.07461	0.879215	0.437021
YNL209W	SSB2	TFIID	1	0.880248	0.992963	0.39231
YHR084W	STE12	CR	1	0.915596	0.730939	-0.0807924
YKL062W	MSN4	TFIID	1	2.02802	1.66759	1.05494
YKR069W	MET1	TFIID	2	1.8076	1.4352	0.375261
YBR191W	RPL21A	TFIID	1	0.856888	0.580394	0.126522
YGR214W	RPS0A	TFIID	2	0.761543	0.746383	0.178792
YMR143W	RPS16A	TFIID	1	0.732062	0.637006	0.054791
YLL045C	RPL8B	TFIID	2	0.757431	0.567783	0.152927
YMR220W	ERG8	TFIID	1	1.91534	1.47272	0.66237
YGR149W	YGR149W	TFIID	2	2.10502	1.39689	0.396389
YDR476C	YDR476C	TFIID	2	1.95029	1.0999	-0.0359586
YHR112C	YHR112C	TFIID	1	1.83331	0.900682	0.176732
YNL130C	CPT1	CR	2	1.77462	1.42006	0.486217
YLR074C	BUD20	TFIID	2	1.57433	1.07898	0.413559
YKL186C	MTR2	TFIID	2	1.5205	0.924362	0.199897
YNL007C	SIS1	CR	1	0.978985	0.994578	0.712997
YGL076C	RPL7A	TFIID	2	0.961452	0.869624	0.182069
YJL210W	PEX2	TFIID	2	2.30247	1.74719	0.368568
YKL117W	SBA1	TFIID	1	1.29389	1.15776	0.653155
YBR287W	YBR287W	TFIID	1	1.25954	0.818903	0.305139
YML070W	DAK1	TFIID	2	2.15137	1.26176	0.131539
YLR150W	STM1	TFIID	2	0.671418	0.605812	0.079326
YOL143C	RIB4	CR	2	1.73166	1.29085	0.0895215
YBR112C	CYC8	TFIID	1	0.734204	0.813715	0.128516
YOR383C	FIT3	CR	1	0.846445	0.113623	-0.272596
YKR089C	TGL4	TFIID	1	1.07465	0.644707	0.0828777
YLR190W	MMR1	TFIID	1	1.20509	0.793004	0.404488
YER046W	SPO73	TFIID	1	1.93673	1.19156	0.118892
YGR010W	NMA2	TFIID	2	2.183	1.41036	0.540343
YDR047W	HEM12	TFIID	1	1.18178	0.867677	0.342002
YPL203W	TPK2	TFIID	2	1.76264	1.30137	0.515338
YGR097W	ASK10	TFIID	2	1.12915	0.600827	0.22988
YPR069C	SPE3	CR	2	1.99298	1.33066	0.423389
YGR204W	ADE3	CR	1	0.94807	0.664505	0.19706
YDR099W	BMH2	TFIID	1	0.806692	0.626648	0.232182
YDR275W	BSC2	CR	1	0.975128	0.544342	0.417137
YKL193C	SDS22	TFIID	1	1.65158	0.864334	0.363073
YLR113W	HOG1	CR	1	1.0326	0.983061	0.413797
YDR019C	GCV1	CR	1	1.19717	0.906641	0.360074
YMR177W	MMT1	CR	2	1.87405	1.15294	0.515463
YNL156C	NSG2	TFIID	2	1.84829	0.845418	0.444793
YJL141C	YAK1	TFIID	1	1.02016	0.830397	0.0922834
YPL252C	YAH1	TFIID	2	1.11676	0.704279	0.233589
YJR103W	URA8	CR	1	1.01732	0.848473	0.39353
YER043C	SAH1	CR	1	1.20051	1.31974	0.722494
YGR148C	RPL24B	TFIID	2	0.558507	0.576258	-0.0299938
YDL126C	CDC48	TFIID	1	1.02147	1.0733	0.448819
YOR360C	PDE2	TFIID	1	1.67783	1.19871	0.44674
YGL056C	SDS23	TFIID	1	1.08814	0.968674	0.340959
YNL328C	MDJ2	TFIID	1	1.38398	1.09705	0.0348222
YDR480W	DIG2	TFIID	2	1.68531	1.18082	0.172825
YER143W	DDI1	TFIID	2	1.51121	1.21038	0.429922
YGR092W	DBF2	TFIID	1	1.49572	0.941733	0.54929
YER090W	TRP2	TFIID	1	1.46861	1.3677	0.177358
YBL106C	SRO77	CR	2	1.68531	0.911739	0.670029
YGR159C	NSR1	TFIID	1	1.33506	1.20801	0.726683
YJR004C	SAG1	CR	1	1.02777	0.715364	-0.0268217
YKL116C	PRR1	TFIID	1	1.78988	1.19359	0.452114
YMR242C	RPL20A	TFIID	1	0.877279	0.857959	0.100013
YGR065C	VHT1	CR	2	1.93068	1.15333	0.221531
YLR375W	STP3	TFIID	1	1.07393	1.04644	0.276026
YDL128W	VCX1	TFIID	2	1.17138	0.744289	0.271845
YDR151C	CTH1	TFIID	1	1.51797	0.771623	0.599936
YMR297W	PRC1	TFIID	1	1.08429	1.07545	-0.0573956
YGR205W	TDA10	TFIID	2	2.01526	1.15279	0.424586
YKL032C	IXR1	TFIID	1	1.14196	0.751236	0.282677
YOL016C	CMK2	TFIID	2	1.75208	1.13317	0.0915121
YMR037C	MSN2	CR	1	1.56183	1.07892	0.679294
YGL191W	COX13	TFIID	2	1.77412	1.51104	0.824835
YJL138C	TIF2	CR	1	1.00996	0.97187	0.449974
YJL187C	SWE1	TFIID	1	1.19287	0.872759	0.287964
YGR229C	SMI1	TFIID	1	1.03075	0.8269	0.334792
YDR527W	RBA50	TFIID	1	1.34912	0.90656	0.304171
YFR042W	KEG1	TFIID	3	2.20548	1.36736	0.333926
YMR009W	ADI1	TFIID	2	2.11422	1.23299	0.292296
YDL229W	SSB1	TFIID	1	0.820115	0.945779	0.32617
YKR080W	MTD1	TFIID	2	1.57189	0.979556	0.540754
YLR448W	RPL6B	TFIID	2	0.724917	0.55333	0.0812302
YMR180C	CTL1	CR	2	1.5819	1.46083	0.576906
YNL281W	HCH1	TFIID	1	1.60392	0.967137	0.855306
YOR054C	VHS3	TFIID	2	1.62706	1.21126	0.113528
YOL006C	TOP1	TFIID	1	0.888715	0.591267	0.291278
YGR049W	SCM4	TFIID	3	1.91889	0.512722	0.371723
YKL165C	MCD4	TFIID	1	1.31951	0.756979	0.255281
YDR132C	YDR132C	CR	1	2.44344	1.39367	0.469498
YBR070C	ALG14	TFIID	2	1.76309	0.990484	0.433302
YPL141C	FRK1	CR	1	1.32494	1.11848	0.600844
YLR376C	PSY3	TFIID	2	1.24663	1.64942	0.260825
YNL234W	YNL234W	TFIID	1	1.48776	0.912931	0.518461
YKL094W	YJU3	TFIID	2	1.81716	1.26791	0.343379
YBL029C-A	YBL029C-A	TFIID	1	2.24667	1.34687	0.818007
YFR030W	MET10	TFIID	2	1.73169	0.877785	0.101254
YBR073W	RDH54	TFIID	1	1.27419	1.02915	0.500264
YDR365C	ESF1	TFIID	1	0.721962	0.783754	0.356183
YLR340W	RPP0	TFIID	1	0.491123	0.729529	0.222656
YGR175C	ERG1	CR	1	1.43143	1.33127	0.549228
YLR333C	RPS25B	TFIID	2	1.21082	0.425241	0.18323
YLR214W	FRE1	CR	1	2.37774	1.86909	0.977458
YDR089W	YDR089W	CR	1	1.17469	0.868638	0.245732
YIL107C	PFK26	TFIID	1	1.36234	0.790938	0.208015
YDR006C	SOK1	TFIID	1	1.50507	1.33712	0.408215
YMR202W	ERG2	TFIID	2	1.97703	1.21381	0.425405
YPL202C	AFT2	CR	2	1.8694	0.735981	0.14699
YMR016C	SOK2	TFIID	1	1.49107	1.32425	0.525763
YBR039W	ATP3	TFIID	1	1.82532	1.4688	1.08928
YGR040W	KSS1	CR	1	1.22108	1.19921	0.51188
YDR297W	SUR2	TFIID	2	1.5585	1.18275	0.495867
YAL039C	CYC3	TFIID	2	1.3422	0.855421	0.107169
YCR008W	SAT4	TFIID	1	1.32114	0.885773	0.289166
YDL012C	YDL012C	TFIID	2	1.66521	0.795812	0.319492
YJR070C	LIA1	TFIID	1	1.44354	1.14651	0.61729
YML121W	GTR1	TFIID	2	0.947883	0.910233	0.241722
YLR058C	SHM2	TFIID	1	1.0009	0.777204	0.317802
YLL023C	POM33	TFIID	1	1.74619	1.38503	0.53493
YLR084C	RAX2	CR	1	1.23609	1.02915	0.50567
YMR296C	LCB1	TFIID	1	0.848619	0.66127	0.175588
YAL044C	GCV3	TFIID	1	1.66355	0.719215	0.387038
YAL005C	SSA1	CR	1	1.02773	1.2788	0.90759
YEL065W	SIT1	CR	1	1.21253	0.81952	0.226539
YIL158W	AIM20	TFIID	2	1.36392	0.968824	0.566192
YJL212C	OPT1	CR	1	1.6431	1.49443	0.73978
YDR389W	SAC7	TFIID	1	1.08526	0.523684	0.281337
YKL039W	PTM1	CR	1	1.24278	0.838745	0.298145
YNL053W	MSG5	TFIID	2	1.71121	0.937914	0.33757
YGL071W	AFT1	TFIID	1	1.021	0.728249	0.183987
YPL068C	YPL068C	TFIID	1	1.73847	1.14583	0.3342
YNL111C	CYB5	TFIID	2	2.01656	1.08406	0.563781
YOR385W	YOR385W	TFIID	2	2.42248	1.45819	0.287948
YJR122W	IBA57	TFIID	2	2.44525	1.78258	0.564747
YGL148W	ARO2	TFIID	2	1.49031	0.750361	0.37853
YLR048W	RPS0B	TFIID	2	0.626708	0.647841	-0.0317057
YPL037C	EGD1	TFIID	2	1.36638	0.988031	0.361157
YPL137C	GIP3	TFIID	1	1.32962	1.01552	0.343986
YML120C	NDI1	TFIID	1	1.74668	1.45898	0.848209
YGL054C	ERV14	TFIID	2	1.11586	0.861822	0.405748
YPR133W-A	TOM5	TFIID	2	2.07322	0.991032	0.208017
YNL087W	TCB2	CR	1	1.85662	1.44197	0.398487
YMR186W	HSC82	CR	1	1.18743	1.46623	1.02753
YBR069C	TAT1	CR	1	1.08625	1.13797	0.480345
YML035C	AMD1	TFIID	1	1.45257	0.773483	0.06713
YOR133W	EFT1	TFIID	2	0.891838	1.07529	0.29418
YGL006W	PMC1	TFIID	2	1.67698	0.947729	0.230026
YDR096W	GIS1	TFIID	1	1.30642	1.03067	0.23111
YGR019W	UGA1	TFIID	2	1.62029	0.71439	0.194848
YGR023W	MTL1	TFIID	1	1.23293	0.671145	-0.00690975
YML086C	ALO1	TFIID	2	2.40684	1.65328	0.729577
YAR018C	KIN3	TFIID	2	1.72091	1.59986	0.476908
YDL072C	YET3	TFIID	2	1.646	1.17622	0.355449
YBR067C	TIP1	TFIID	1	1.13642	0.872867	0.546507
YNR053C	NOG2	TFIID	1	1.11999	1.27196	0.573477
YJR030C	YJR030C	TFIID	1	1.06834	0.567994	0.26614
YOL158C	ENB1	CR	2	1.43373	1.0879	0.354995
YCL001W	RER1	TFIID	2	1.84285	1.00904	0.808298
YGL190C	CDC55	TFIID	2	1.15966	0.952314	0.302893
YJR130C	STR2	TFIID	2	2.0145	1.45774	0.956316
YLR220W	CCC1	TFIID	1	1.01001	0.956759	0.314499
YIR018W	YAP5	TFIID	2	1.18208	0.906417	0.119424
YOR337W	TEA1	TFIID	1	1.81101	1.41914	0.151713
YMR184W	ADD37	TFIID	2	2.37955	1.40301	0.424151
YCR011C	ADP1	TFIID	1	1.07045	0.80093	0.274906
YKL052C	ASK1	TFIID	2	1.64935	1.29078	0.353194
YIL049W	DFG10	TFIID	2	2.20033	1.27043	0.480851
YCR021C	HSP30	CR	1	1.20983	0.588078	-0.0200531
YBR007C	DSF2	CR	1	1.26352	0.980347	0.0687809
YBL076C	ILS1	TFIID	2	1.12819	0.951755	0.278045
YLR008C	PAM18	TFIID	2	1.75924	1.27839	0.624246
YER026C	CHO1	CR	1	1.61388	1.32766	0.456426
YOL012C	HTZ1	TFIID	2	1.60733	1.13544	0.465043
YBR034C	HMT1	TFIID	2	1.76445	1.26001	0.63732
YHR042W	NCP1	TFIID	1	1.06887	0.896904	0.377716
YGR233C	PHO81	TFIID	2	0.950831	0.483125	0.0472762
YKL161C	KDX1	TFIID	3	2.34457	1.41418	0.363129
YFR010W	UBP6	TFIID	2	1.49863	0.989266	0.627727
YLL024C	SSA2	CR	1	1.189	1.41657	1.0729
YPL079W	RPL21B	TFIID	2	1.23233	0.888652	0.356372
YLR028C	ADE16	TFIID	2	1.26869	0.752203	0.734832
YML056C	IMD4	TFIID	1	1.42052	1.55731	0.948294
YDR249C	YDR249C	TFIID	2	1.96419	1.23137	0.222556
YGL031C	RPL24A	TFIID	2	0.742727	0.543561	0.0723304
YPL179W	PPQ1	TFIID	2	1.3119	0.866224	0.296614
YOR071C	NRT1	TFIID	1	1.20291	1.16922	0.266629
YOR044W	IRC23	TFIID	2	1.95726	2.19435	0.457787
YBR189W	RPS9B	TFIID	2	0.937878	0.931862	0.225107
YNL079C	TPM1	TFIID	2	1.4142	1.11941	0.263034
YPL262W	FUM1	TFIID	1	1.95195	1.00426	0.707384
YBR077C	SLM4	TFIID	2	1.59685	1.19035	0.539717
YDL140C	RPO21	TFIID	1	1.09018	0.976059	0.331142
YNL108C	YNL108C	TFIID	2	1.3069	0.973903	-0.0224914
YDR214W	AHA1	CR	1	1.68913	1.9057	1.46422
YDL192W	ARF1	TFIID	2	1.21066	0.731001	0.437319
YBR114W	RAD16	TFIID	1	1.41869	0.939754	0.229781
YBR038W	CHS2	TFIID	1	1.14815	1.1401	0.429218
YNR043W	MVD1	TFIID	1	1.30696	0.827408	0.362451
YDL238C	GUD1	TFIID	2	1.9283	1.26535	0.485632
YGL221C	NIF3	TFIID	2	2.02391	1.16651	0.668874
YJR092W	BUD4	TFIID	1	1.1988	0.918668	0.365527
YPR114W	YPR114W	TFIID	1	1.27175	1.02115	0.296254
YNL042W	BOP3	TFIID	2	1.84482	1.1428	0.108123
YPL028W	ERG10	TFIID	2	1.49931	1.3379	0.597974
YPR115W	RGC1	TFIID	1	1.10061	0.792245	0.361432
YDR194C	MSS116	TFIID	1	1.18556	0.781568	0.610514
YDR156W	RPA14	TFIID	2	1.15118	0.945736	0.321562
YNL133C	FYV6	TFIID	3	2.71944	1.65877	0.855284
YLR378C	SEC61	TFIID	2	0.934368	0.812671	0.171264
YPR052C	NHP6A	TFIID	2	1.79812	0.798055	0.56261
YER036C	ARB1	TFIID	1	1.25971	0.891518	0.482278
YOR020C	HSP10	TFIID	1	2.15676	1.95911	1.35047
YBR025C	OLA1	TFIID	1	1.16977	1.11212	0.534426
YML016C	PPZ1	TFIID	1	1.52744	0.713836	0.460965
YKL138C	MRPL31	TFIID	2	1.97313	1.35703	0.410687
YHR163W	SOL3	TFIID	2	1.21507	1.02978	0.318952
YHR030C	SLT2	TFIID	2	1.85471	1.18583	0.410845
YOR306C	MCH5	CR	1	1.09322	0.928875	0.304761
YLR332W	MID2	TFIID	1	1.14016	0.711747	0.190507
YNL064C	YDJ1	TFIID	1	1.34811	1.57375	1.1669
YOR347C	PYK2	TFIID	2	1.44421	1.00233	0.237792
YGL206C	CHC1	TFIID	1	0.987147	0.826012	0.200165
YOL052C	SPE2	TFIID	2	1.99468	0.871733	0.503272
YER002W	NOP16	TFIID	2	1.40196	0.459574	0.521181
YDR517W	GRH1	TFIID	2	1.29693	0.880864	0.0120591
YBR199W	KTR4	TFIID	2	1.16372	0.731885	0.331122
YLR089C	ALT1	TFIID	2	1.43616	1.305	0.429509
YML053C	YML053C	TFIID	2	1.74932	1.24706	0.418446
YKL112W	ABF1	TFIID	2	1.24572	0.883212	0.215162
YLL062C	MHT1	TFIID	2	2.09224	0.858089	0.0344005
YIR011C	STS1	TFIID	2	1.94678	1.27799	0.57757
YER092W	IES5	TFIID	2	2.72907	1.72557	0.721108
YML075C	HMG1	TFIID	2	1.39388	1.08293	0.456054
YKR057W	RPS21A	TFIID	2	1.10548	0.656538	0.232489
YIL002W-A	YIL002W-A	TFIID	2	1.77374	1.27587	0.125611
YPR158W	CUR1	TFIID	1	1.09908	0.808641	0.511521
YNR060W	FRE4	CR	2	1.99573	1.50936	0.284742
YMR083W	ADH3	TFIID	2	1.18043	1.18891	0.466814
YMR217W	GUA1	TFIID	1	1.32299	1.24812	0.607437
YOR162C	YRR1	TFIID	2	2.12525	1.18884	0.167224
YFR005C	SAD1	TFIID	2	1.792	1.53987	0.372959
YMR121C	RPL15B	TFIID	2	1.32	1.17994	0.646579
YBL028C	YBL028C	TFIID	2	2.22064	1.12823	0.182251
YLR130C	ZRT2	CR	2	1.5398	1.15641	0.576195
YDR472W	TRS31	TFIID	2	1.42919	0.860438	0.847422
YOR058C	ASE1	TFIID	2	1.38436	1.08765	0.464069
YLR278C	YLR278C	TFIID	1	1.45694	1.13081	0.236057
YJL117W	PHO86	TFIID	2	1.32616	0.976517	0.206155
YMR086W	SEG1	TFIID	1	1.59691	1.01625	0.399199
YMR265C	YMR265C	CR	2	2.01956	1.70728	0.390988
YGR267C	FOL2	TFIID	2	1.84688	1.01315	0.433817
YHR039C-A	VMA10	TFIID	2	1.87034	0.675355	0.563294
YKR067W	GPT2	TFIID	1	2.0902	1.3665	0.333111
YML018C	YML018C	TFIID	2	1.46231	1.16144	0.190245
YDR334W	SWR1	TFIID	2	0.918323	0.622945	0.123198
YLL029W	FRA1	TFIID	2	0.996813	0.695142	0.0552947
YGL178W	MPT5	TFIID	1	1.58742	1.09947	0.513561
YLL050C	COF1	TFIID	2	1.53452	0.82014	0.475268
YMR311C	GLC8	TFIID	2	1.89369	0.74971	0.419652
YOR209C	NPT1	TFIID	2	1.558	1.02873	0.501435
YIL075C	RPN2	TFIID	2	1.2506	0.974569	0.492163
YPL089C	RLM1	TFIID	2	1.28595	0.799602	0.0977431
YHR048W	YHK8	TFIID	2	2.14125	1.38406	0.16606
YPL048W	CAM1	TFIID	2	1.52421	1.0469	0.165682
YDR153C	ENT5	TFIID	1	1.20872	0.996656	0.276187
YLR407W	YLR407W	TFIID	2	1.90055	1.29346	0.248299
YMR241W	YHM2	TFIID	2	1.62484	0.838893	0.251877
YLR413W	INA1	CR	1	1.0816	1.10173	0.778992
YML034W	SRC1	TFIID	2	1.24962	0.718167	0.200415
YGR130C	YGR130C	TFIID	2	1.24365	1.01181	0.0994557
YNL305C	BXI1	TFIID	2	1.7526	0.292821	0.18405
YDR086C	SSS1	TFIID	2	1.49926	0.851607	0.165379
YHR007C	ERG11	CR	1	1.0686	1.32156	0.335935
YBL041W	PRE7	TFIID	2	1.30226	0.921898	0.541007
YGL248W	PDE1	TFIID	2	1.79689	1.23111	0.0354432
YDR146C	SWI5	TFIID	1	1.43953	0.929859	0.595106
YLL018C	DPS1	TFIID	2	1.37378	1.03494	0.256824
YNL240C	NAR1	TFIID	2	1.46807	1.07406	0.04875
YGR152C	RSR1	TFIID	2	1.50168	0.936733	0.410017
YHR193C	EGD2	TFIID	2	1.11875	0.998166	0.391879
YNL278W	CAF120	TFIID	2	1.73344	1.38149	0.181685
YDL014W	NOP1	TFIID	2	0.899285	0.790206	0.429557
YML117W	NAB6	TFIID	1	1.25854	0.879422	0.0733109
YGL026C	TRP5	TFIID	2	1.51275	0.952118	0.192917
YMR008C	PLB1	TFIID	2	1.66657	1.09168	0.400008
YLR387C	REH1	TFIID	2	1.53233	1.14246	0.476492
YFL004W	VTC2	CR	2	1.38219	0.73872	-0.00828477
YKL082C	RRP14	TFIID	2	1.10274	1.33961	0.733575
YDR391C	YDR391C	TFIID	2	1.49418	1.18937	0.460606
YOR185C	GSP2	TFIID	2	1.45956	0.94825	0.351167
YPR165W	RHO1	TFIID	2	1.1508	0.765761	0.293761
YLR259C	HSP60	TFIID	1	1.0367	1.26992	0.717822
YDR505C	PSP1	TFIID	2	1.66576	1.27085	0.379708
YGL215W	CLG1	TFIID	2	1.34786	1.10803	0.254075
YNL280C	ERG24	TFIID	1	1.58847	1.137	0.633977
YJL186W	MNN5	TFIID	2	1.18901	0.72092	0.288012
YBR101C	FES1	TFIID	1	1.65581	0.886673	1.00284
YMR149W	SWP1	TFIID	2	1.85365	1.29969	0.334745
YHR143W-A	RPC10	TFIID	2	2.00018	1.48673	0.582746
YNL157W	IGO1	TFIID	2	1.91404	2.03785	0.887849
YNR017W	TIM23	TFIID	2	1.05698	1.06619	0.328313
YOL082W	ATG19	TFIID	2	1.49184	0.978186	0.448623
YGL045W	RIM8	TFIID	3	1.57577	0.94864	0.140717
YGR218W	CRM1	TFIID	1	1.24134	0.99879	0.372783
YBR248C	HIS7	TFIID	2	1.72392	0.952378	0.193931
YDR524C	AGE1	TFIID	2	1.81096	1.33436	0.359898
YCR037C	PHO87	TFIID	2	0.892616	0.828572	0.015935
YHL027W	RIM101	TFIID	2	0.964544	0.895574	0.115787
YHL020C	OPI1	TFIID	2	1.08776	1.60692	0.345417
YLR410W	VIP1	TFIID	2	1.37728	0.848015	0.348196
YOR316C	COT1	TFIID	2	1.15732	1.07958	0.499535
YKR016W	MIC60	TFIID	2	1.78841	1.63958	0.716293
YER103W	SSA4	TFIID	1	1.46482	0.905101	-0.0273266
YOL002C	IZH2	CR	1	1.73859	1.00874	0.681125
YBR047W	FMP23	TFIID	2	2.64265	0.925226	-0.0977223
YNL212W	VID27	TFIID	3	2.18074	1.66251	0.763927
YBR151W	APD1	TFIID	2	1.12773	0.58946	-0.319771
YOR051C	ETT1	TFIID	2	1.17929	0.482447	0.338422
YJR096W	YJR096W	TFIID	2	2.01138	1.22288	0.334119
YPL095C	EEB1	CR	1	2.5772	2.03606	0.795113
YNR033W	ABZ1	TFIID	2	1.64766	1.07865	0.281294
YDL132W	CDC53	TFIID	2	1.69058	1.0808	0.473594
YJR008W	MHO1	TFIID	2	0.894617	0.599378	0.750691
YDR213W	UPC2	TFIID	2	1.60424	1.21128	0.407133
YPL218W	SAR1	TFIID	2	1.47388	0.991488	0.452142
YEL042W	GDA1	TFIID	2	1.15341	0.986438	0.286081
YNL016W	PUB1	TFIID	2	1.07333	0.973145	0.269398
YDL052C	SLC1	TFIID	2	1.81917	1.19455	0.538613
YPR181C	SEC23	TFIID	2	1.15882	1.12608	0.268578
YLL026W	HSP104	CR	1	1.04681	0.961953	0.537042
YKR043C	SHB17	TFIID	2	1.28761	0.898461	0.547108
YBL005W	PDR3	TFIID	2	1.10645	1.14417	0.551504
YOR114W	YOR114W	TFIID	2	2.16549	1.60093	0.322947
YDL046W	NPC2	TFIID	2	1.20389	1.0695	0.192373
YBR093C	PHO5	TFIID	2	1.4671	1.34269	0.322631
YJL002C	OST1	TFIID	2	1.57587	0.887016	0.446754
YJL217W	REE1	TFIID	2	2.47064	2.08431	0.58142
YGR191W	HIP1	TFIID	2	1.54077	1.17384	0.586734
YDR248C	YDR248C	TFIID	2	1.53647	0.864768	0.388252
YNL154C	YCK2	TFIID	2	1.47388	1.27338	0.38526
YOR099W	KTR1	TFIID	2	1.20879	0.832131	0.216544
YGL231C	EMC4	TFIID	2	2.41995	1.40595	0.596957
YDR258C	HSP78	TFIID	1	1.21222	0.961455	0.512466
YDR298C	ATP5	TFIID	2	1.96383	1.74793	0.87824
YKL218C	SRY1	TFIID	2	1.8961	1.34556	0.497266
YGL194C-A	YGL194C-A	TFIID	2	2.24752	1.46622	0.726416
YIL009W	FAA3	CR	1	1.40879	1.11161	0.525906
YER141W	COX15	TFIID	2	1.87088	1.67564	0.67063
YGR124W	ASN2	TFIID	2	1.48864	1.28107	0.462241
YHR149C	SKG6	TFIID	2	1.45521	0.76801	0.201551
YHR152W	SPO12	TFIID	2	2.10926	1.14617	0.466314
YLR301W	HRI1	TFIID	2	1.73204	0.990745	0.239868
YOL017W	ESC8	TFIID	2	1.79192	1.08628	0.0651323
YNL283C	WSC2	TFIID	2	1.20912	0.860928	0.257406
YPL032C	SVL3	TFIID	2	1.21982	1.00189	0.34827
YER075C	PTP3	TFIID	2	1.88097	1.20463	0.537832
YPR122W	AXL1	CR	2	1.30644	0.648079	0.00164314
YFL038C	YPT1	TFIID	2	1.77323	1.17342	0.391764
YDR071C	PAA1	TFIID	2	1.45201	0.887788	0.257387
YER165W	PAB1	TFIID	2	1.30859	1.09845	0.408034
YNL008C	ASI3	CR	1	1.85651	1.21138	1.12219
YDL010W	GRX6	TFIID	3	1.89594	1.74412	0.232875
YGR241C	YAP1802	TFIID	2	1.34704	1.30704	0.45472
YGR009C	SEC9	TFIID	2	1.74215	1.13644	0.465414
YPL226W	NEW1	TFIID	2	1.31243	1.19235	0.568886
YGR162W	TIF4631	TFIID	2	1.06521	1.17641	0.384752
YMR079W	SEC14	TFIID	2	1.44465	1.13873	0.43654
YLL043W	FPS1	TFIID	2	1.30563	1.25174	0.330502
YER133W	GLC7	TFIID	2	1.29371	1.10259	0.388908
YBR296C	PHO89	CR	2	1.17765	0.741853	-0.164626
YDL015C	TSC13	TFIID	2	1.76593	1.02742	0.344949
YMR188C	MRPS17	TFIID	2	1.54068	0.408373	0.0977631
YER146W	LSM5	TFIID	2	2.68073	2.16272	0.657744
YER169W	RPH1	TFIID	2	1.82063	1.04265	0.574717
YNR036C	MRPS12	TFIID	3	2.60845	1.94869	1.00074
YMR253C	YMR253C	TFIID	2	1.75949	0.643588	0.0161439
YOR288C	MPD1	TFIID	2	1.97252	1.21987	0.110783
YOR008C	SLG1	TFIID	2	1.93367	1.51321	0.525183
YJL213W	YJL213W	TFIID	2	1.78181	1.4683	0.608802
YCR009C	RVS161	TFIID	2	1.30067	0.550477	-0.238722
YEL017W	GTT3	TFIID	2	1.27772	1.05055	0.155735
YJR074W	MOG1	TFIID	2	2.50233	1.93208	0.853134
YMR191W	SPG5	TFIID	2	1.89773	1.6262	0.5842
YDL047W	SIT4	TFIID	2	1.29068	1.1389	0.321381
YGL087C	MMS2	TFIID	2	1.11192	1.10712	0.638191
YLL056C	YLL056C	TFIID	2	2.503	2.3314	0.689451
YPL144W	POC4	TFIID	2	1.59459	0.799679	0.953851
YGL122C	NAB2	TFIID	2	0.969922	0.823558	0.327213
YER152C	YER152C	TFIID	2	1.8415	1.22211	0.702166
YHL047C	ARN2	CR	2	1.11111	0.916297	0.372852
YER019W	ISC1	TFIID	2	1.33913	1.26003	0.256421
YBR213W	MET8	TFIID	3	2.43046	1.80947	0.284723
YBR135W	CKS1	TFIID	2	1.79482	1.61102	0.315306
YJL042W	MHP1	TFIID	2	1.77665	1.2612	0.282219
YGL009C	LEU1	TFIID	2	1.42942	1.34499	0.798921
YEL027W	VMA3	TFIID	2	1.23824	1.47512	0.351212
YPR200C	ARR2	TFIID	3	1.83666	1.58771	-0.0475878
YFL016C	MDJ1	TFIID	2	1.42605	1.32196	0.450369
YPL260W	YPL260W	TFIID	2	1.23302	0.722942	0.212104
YCR082W	AHC2	TFIID	2	2.60107	2.13309	1.02866
YHR154W	RTT107	TFIID	2	1.41767	0.765354	0.235853
YGL021W	ALK1	TFIID	2	1.66713	1.19324	0.496205
YPR036W	VMA13	TFIID	2	1.06852	0.853787	0.13588
YML126C	ERG13	TFIID	1	1.37698	1.12414	0.544734
YOR327C	SNC2	TFIID	3	1.72512	1.61648	0.278103
YOR224C	RPB8	TFIID	2	1.68446	1.21332	0.808972
YHR020W	YHR020W	TFIID	2	1.38578	0.900156	0.166562
YAL053W	FLC2	TFIID	2	1.49532	0.883159	0.340021
YGR211W	ZPR1	TFIID	1	1.48931	1.60089	0.868978
YNL186W	UBP10	TFIID	1	1.22792	1.04212	0.450672
YNL011C	YNL011C	TFIID	2	1.79079	1.69741	0.30092
YKL065C	YET1	TFIID	2	1.2991	1.04891	0.140049
YGL108C	YGL108C	TFIID	2	2.10084	1.55362	0.291241
YJL154C	VPS35	TFIID	2	1.48823	1.06965	0.501541
YGR185C	TYS1	TFIID	2	1.39607	0.94915	0.399485
YDL232W	OST4	TFIID	2	2.14442	1.49872	0.776616
YDR483W	KRE2	TFIID	2	1.0899	0.751282	-0.0417214
YER178W	PDA1	TFIID	2	1.43829	1.19747	0.119881
YPL106C	SSE1	TFIID	1	1.33967	1.18913	0.892531
YKL100C	YPF1	TFIID	2	1.20579	1.29457	0.397353
YPL234C	VMA11	TFIID	2	1.50443	1.2626	0.429028
YOR349W	CIN1	TFIID	2	1.95434	1.64431	0.383676
YER122C	GLO3	TFIID	2	1.37009	1.11616	0.415577
YIL047C	SYG1	TFIID	2	1.07971	0.900854	-0.129207
YNL141W	AAH1	TFIID	1	1.38996	1.11443	0.479571
YMR243C	ZRC1	TFIID	2	1.23269	0.755993	0.0994821
YOR157C	PUP1	TFIID	3	1.74573	1.21154	0.69024
YDR231C	COX20	TFIID	2	2.27601	1.32303	0.230049
YGR127W	YGR127W	TFIID	2	1.83245	1.14015	0.127695
YPL240C	HSP82	CR	1	1.16697	1.2812	1.23008
YPL232W	SSO1	TFIID	2	1.66228	1.39361	0.550416
YNL299W	TRF5	CR	1	1.22959	0.794327	0.501405
YLR223C	IFH1	TFIID	2	1.3744	0.893062	0.519206
YHR005C-A	TIM10	TFIID	2	1.30215	0.740294	0.176505
YOL048C	RRT8	TFIID	2	1.73621	1.05679	0.195536
YBR086C	IST2	TFIID	2	1.1366	1.05652	0.263957
YPL159C	PET20	TFIID	2	1.72112	1.07173	0.70262
YDR448W	ADA2	TFIID	2	1.13377	1.05476	0.230505
YOR036W	PEP12	TFIID	2	1.78915	1.22353	0.0666391
YPR016C	TIF6	TFIID	2	1.46821	0.995026	0.613349
YDL174C	DLD1	TFIID	2	1.4413	1.23305	-0.0389149
YPL212C	PUS1	TFIID	2	1.39524	1.15476	0.330836
YIL118W	RHO3	TFIID	2	1.18963	0.943972	0.138432
YOL038W	PRE6	TFIID	2	1.43542	0.925514	0.555421
YLR193C	UPS1	TFIID	3	1.91439	0.73815	0.395873
YGR260W	TNA1	TFIID	1	1.80623	1.35118	0.544238
YIR031C	DAL7	TFIID	3	1.96801	1.29407	0.0675896
YPL157W	TGS1	TFIID	2	0.739987	0.218174	0.231403
YCR089W	FIG2	TFIID	2	1.48447	1.08918	-0.204738
YOR151C	RPB2	TFIID	2	1.21833	0.982943	0.415047
YBR004C	GPI18	TFIID	2	2.65273	1.39487	0.493029
YMR110C	HFD1	TFIID	2	1.56159	1.16609	0.186873
YMR071C	TVP18	TFIID	2	1.8829	1.55889	0.959666
YDR293C	SSD1	TFIID	2	1.27201	1.06533	0.19106
YDL065C	PEX19	TFIID	2	1.77676	1.36759	0.630843
YNL068C	FKH2	TFIID	2	1.61782	1.0696	0.21799
YOL122C	SMF1	CR	2	1.85781	1.56686	0.854838
YGR078C	PAC10	TFIID	2	1.80834	0.838606	0.567076
YJR001W	AVT1	TFIID	2	1.94022	1.33396	0.504521
YDL137W	ARF2	TFIID	2	1.04881	0.440794	-0.0435568
YMR295C	YMR295C	TFIID	2	1.65829	1.42552	0.626882
YKL159C	RCN1	TFIID	3	1.96995	1.46288	0.28201
YOR246C	ENV9	TFIID	2	1.2459	1.31544	0.425762
YOL139C	CDC33	TFIID	2	1.01607	0.948878	0.648894
YJL200C	ACO2	TFIID	2	1.66777	1.18013	0.081438
YDR441C	APT2	TFIID	2	1.88007	1.79339	0.583403
YJR117W	STE24	TFIID	2	1.83792	1.21544	0.575279
YNL102W	POL1	TFIID	2	1.47578	0.819643	0.235305
YLR104W	LCL2	TFIID	3	2.29329	1.48191	0.50625
YMR013C	SEC59	TFIID	2	1.9325	1.41779	0.510653
YHR103W	SBE22	TFIID	2	1.37497	1.12179	0.324175
YMR278W	PRM15	TFIID	2	1.58916	1.23871	0.616534
YGR042W	YGR042W	CR	1	1.27455	0.943358	0.743428
YIL106W	MOB1	TFIID	2	1.79115	1.39842	0.556578
YPL003W	ULA1	TFIID	2	2.09536	1.30542	0.329479
YOR089C	VPS21	TFIID	2	1.21473	0.937978	0.330168
YPL225W	YPL225W	TFIID	2	2.11715	1.2082	0.706186
YMR263W	SAP30	TFIID	2	1.96985	1.41551	0.657699
YKL184W	SPE1	TFIID	2	1.53758	1.3661	0.567591
YNL169C	PSD1	CR	2	1.4135	1.21034	0.325283
YIL142W	CCT2	TFIID	2	1.46075	1.2498	0.669511
YPL273W	SAM4	TFIID	2	1.80283	0.953976	0.456062
YDR111C	ALT2	TFIID	1	1.59639	1.48295	0.839328
YBR255C-A	YBR255C-A	TFIID	3	2.32104	1.88871	0.89697
YHR023W	MYO1	TFIID	2	1.53944	1.08628	0.450714
YDR350C	ATP22	TFIID	2	1.82832	1.21695	0.380239
YCL024W	KCC4	TFIID	2	1.46238	0.797575	0.200237
YOR311C	DGK1	TFIID	2	1.41931	1.20868	0.397477
YDR129C	SAC6	TFIID	2	1.33625	0.947107	0.310719
YOR045W	TOM6	TFIID	2	2.29842	2.21508	1.10412
YDR169C	STB3	TFIID	2	1.615	1.18313	0.318644
YFR014C	CMK1	TFIID	2	1.96686	1.27767	0.361714
YPR067W	ISA2	TFIID	3	2.80429	1.75212	0.998784
YDL101C	DUN1	TFIID	2	1.46243	0.960941	0.33611
YER086W	ILV1	TFIID	2	1.62536	1.05865	0.341023
YPL190C	NAB3	TFIID	2	1.28316	0.921352	0.558786
YGR054W	YGR054W	TFIID	2	1.31899	0.927818	0.398666
YGL058W	RAD6	TFIID	2	2.33443	1.1117	0.593182
YML017W	PSP2	TFIID	2	1.46025	0.982225	0.350416
YLR353W	BUD8	TFIID	2	1.33421	1.04428	0.335025
YLR131C	ACE2	TFIID	2	1.57246	1.06539	0.375992
YPL242C	IQG1	TFIID	2	1.63505	1.02141	0.599854
YDL078C	MDH3	TFIID	2	1.6466	1.22898	0.217045
YGL200C	EMP24	TFIID	2	1.64234	0.838438	0.347926
YMR010W	YMR010W	TFIID	2	1.57307	1.21536	0.558855
YOR103C	OST2	TFIID	3	2.44165	2.17985	1.13868
YGL196W	DSD1	TFIID	2	1.79004	1.35069	0.438
YNL155W	CUZ1	TFIID	2	1.69692	1.29905	0.445764
YDR012W	RPL4B	TFIID	2	1.19134	1.28159	0.703098
YMR203W	TOM40	TFIID	2	1.44313	1.41315	0.42153
YAL007C	ERP2	TFIID	2	1.49893	1.34307	0.355728
YDR228C	PCF11	TFIID	2	2.0004	1.46118	0.376617
YLR219W	MSC3	TFIID	2	1.47128	1.0696	0.338457
YMR216C	SKY1	TFIID	2	1.02434	0.836747	0.399478
YPR041W	TIF5	TFIID	2	1.37069	1.51465	0.490226
YGR285C	ZUO1	TFIID	2	1.48055	1.23294	0.576994
YDL086W	YDL086W	TFIID	2	2.0694	1.19394	0.409296
YML129C	COX14	TFIID	3	2.1726	1.48645	0.624059
YDL131W	LYS21	TFIID	2	1.63159	1.04001	0.301443
YJL192C	SOP4	TFIID	2	1.85075	1.148	-0.063913
YNR013C	PHO91	TFIID	2	1.17914	1.0633	0.289572
YIL045W	PIG2	TFIID	2	1.96885	0.971211	0.051344
YPL237W	SUI3	TFIID	2	1.20926	1.28564	0.674868
YML012W	ERV25	TFIID	2	1.63238	0.812601	0.406741
YOR219C	STE13	TFIID	2	1.80627	1.2094	0.233208
YER136W	GDI1	TFIID	2	1.39628	1.01768	0.355314
YKL084W	HOT13	CR	1	1.7299	1.09803	0.781665
YCR084C	TUP1	TFIID	2	0.984169	1.15456	0.131669
YIL043C	CBR1	TFIID	2	2.00745	1.25793	0.63819
YOR027W	STI1	CR	1	1.53165	1.2996	1.17836
YIL033C	BCY1	TFIID	2	1.45107	1.05208	0.407886
YBR104W	YMC2	TFIID	2	1.38118	0.221262	-0.191571
YJL127C-B	YJL127C-B	TFIID	2	1.25326	0.672803	0.266983
YPL055C	LGE1	TFIID	3	1.4128	1.06964	0.521682
YDR245W	MNN10	TFIID	2	1.38264	1.21153	0.533964
YEL036C	ANP1	TFIID	2	1.68933	1.3979	0.425956
YLR126C	YLR126C	TFIID	2	1.3972	1.02782	-0.212312
YEL020W-A	TIM9	TFIID	3	2.53733	2.28174	0.680213
YOL064C	MET22	TFIID	2	2.39856	1.6689	0.463625
YPL204W	HRR25	TFIID	2	1.26988	1.15034	0.231442
YMR074C	YMR074C	CR	2	2.4589	1.80543	0.547239
YBR290W	BSD2	TFIID	2	1.99718	1.59352	0.609104
YOR319W	HSH49	TFIID	2	2.19181	1.86827	0.702947
YGR074W	SMD1	TFIID	3	2.78489	1.44524	1.20893
YHR061C	GIC1	TFIID	2	1.26613	1.1414	0.334919
YOL060C	MAM3	TFIID	2	1.47218	1.20828	0.340329
YPL050C	MNN9	TFIID	2	1.61701	1.11415	0.406981
YDL185W	VMA1	TFIID	2	1.19809	0.937227	0.320241
YLR270W	DCS1	TFIID	3	2.20622	1.5077	0.548398
YGL010W	MPO1	TFIID	2	2.02767	1.28206	0.95444
YKL077W	YKL077W	TFIID	2	1.58796	1.29579	0.459642
YGR222W	PET54	CR	2	1.48686	0.961948	0.40714
YDR411C	DFM1	TFIID	2	1.79189	1.33011	0.427295
YLR330W	CHS5	TFIID	2	1.24081	0.749161	0.245258
YCL038C	ATG22	TFIID	2	1.97001	1.25252	0.699411
YHL029C	OCA5	TFIID	1	1.35942	1.06706	0.195179
YBR085W	AAC3	TFIID	2	2.01439	1.21519	0.268183
YBR269C	SDH8	TFIID	3	2.31153	1.38551	0.515731
YOR332W	VMA4	TFIID	2	1.39618	1.14639	0.39559
YOL004W	SIN3	TFIID	2	1.47682	1.10249	0.396737
YGR033C	TIM21	TFIID	3	1.37757	0.586041	-0.145319
YML078W	CPR3	TFIID	2	2.29841	1.8516	0.454796
YOL077W-A	ATP19	TFIID	2	2.45652	1.72801	1.07504
YOL036W	YOL036W	TFIID	2	1.45738	0.916476	0.234144
YNL103W	MET4	TFIID	2	1.74429	1.05065	0.454582
YDL147W	RPN5	TFIID	2	1.24567	0.680443	0.333898
YGL040C	HEM2	TFIID	2	2.11519	1.63061	0.917813
YNR028W	CPR8	TFIID	2	1.71737	1.12223	0.385772
YBR207W	FTH1	TFIID	2	1.28457	1.17153	0.247283
YDR408C	ADE8	TFIID	2	1.66774	1.1322	0.189637
YDL133W	SRF1	TFIID	2	1.6259	0.839352	0.116621
YGL186C	TPN1	TFIID	2	1.77256	1.40736	0.248738
YNL255C	GIS2	TFIID	2	1.68594	0.886312	0.493116
YER068W	MOT2	TFIID	2	1.28397	1.03433	0.33552
YOR310C	NOP58	TFIID	2	0.97856	0.935556	0.368438
YDR093W	DNF2	TFIID	2	1.47197	1.16842	0.18484
YDR405W	MRP20	TFIID	2	1.24869	0.490425	0.167805
YOR301W	RAX1	TFIID	2	1.86205	1.2845	0.571751
YML064C	TEM1	TFIID	3	1.51987	1.16968	0.426416
YBL035C	POL12	TFIID	2	1.34271	0.817021	0.191821
YPL220W	RPL1A	TFIID	2	1.1248	0.735557	0.325504
YDR059C	UBC5	TFIID	3	3.17668	2.18865	1.09624
YGR061C	ADE6	TFIID	2	1.33139	1.17779	0.540497
YLR216C	CPR6	TFIID	1	1.6175	1.21272	0.776576
YOL032W	OPI10	TFIID	2	1.53679	1.13989	0.663947
YKR092C	SRP40	TFIID	2	1.51187	0.999573	0.20361
YDR261C	EXG2	TFIID	2	1.64659	1.52439	0.421528
YDR098C	GRX3	TFIID	2	1.89621	1.29254	0.508458
YHR068W	DYS1	TFIID	2	1.59959	1.65321	0.446295
YDL236W	PHO13	TFIID	2	1.70616	1.05083	0.193728
YHR006W	STP2	TFIID	2	1.60718	1.2419	0.415525
YOL100W	PKH2	TFIID	2	1.63244	1.13631	0.388086
YDR341C	YDR341C	TFIID	2	2.01212	1.39447	0.333214
YDL004W	ATP16	TFIID	2	1.90123	1.36898	0.867334
YMR252C	YMR252C	TFIID	2	0.98629	0.547447	0.104451
YDR244W	PEX5	TFIID	2	1.82837	0.927519	0.310395
YIR033W	MGA2	TFIID	2	1.88934	1.36984	0.864985
YHR175W	CTR2	CR	2	0.827588	1.12086	0.697616
YJL103C	GSM1	TFIID	2	1.62858	1.15754	0.546012
YNL118C	DCP2	TFIID	2	1.14749	0.678218	0.278189
YAL013W	DEP1	TFIID	2	1.2716	1.3594	0.389167
YLR314C	CDC3	TFIID	2	1.00171	0.651422	0.25734
YJR085C	YJR085C	TFIID	3	1.62498	1.63801	0.67859
YER155C	BEM2	TFIID	2	1.35381	1.16281	0.404812
YLR455W	PDP3	TFIID	2	1.33204	0.619382	0.190095
YMR072W	ABF2	TFIID	2	1.86464	1.14786	0.671091
YBL103C	RTG3	TFIID	2	1.21916	1.00565	0.148142
YPL052W	OAZ1	TFIID	2	2.41707	1.54078	0.862563
YPL094C	SEC62	TFIID	3	1.7942	1.44966	0.614176
YLL061W	MMP1	CR	2	1.70905	1.38741	0.487093
YDR294C	DPL1	TFIID	2	1.46364	1.15618	0.368189
YLR001C	YLR001C	TFIID	2	2.0661	1.15995	0.778259
YKL009W	MRT4	TFIID	2	1.09334	0.986005	0.354399
YDR264C	AKR1	TFIID	2	1.20195	0.735998	0.153314
YNL047C	SLM2	TFIID	2	1.6332	1.19582	0.506016
YAL014C	SYN8	TFIID	3	2.62624	2.11975	0.997619
YNL123W	NMA111	TFIID	2	1.38647	1.31061	0.506239
YBR041W	FAT1	TFIID	2	1.99536	1.62561	0.436666
YHL007C	STE20	TFIID	2	1.59925	1.32722	0.346722
YCL037C	SRO9	TFIID	2	1.13735	1.10582	0.406494
YPR168W	NUT2	TFIID	3	3.00382	1.97535	0.946184
YPR003C	YPR003C	TFIID	2	1.71921	0.622578	0.0835578
YGL127C	SOH1	TFIID	3	1.41989	0.671972	0.182889
YJL201W	ECM25	TFIID	2	1.70503	1.3783	0.433346
YER060W	FCY21	TFIID	3	2.47702	1.937	0.671804
YDL208W	NHP2	TFIID	2	1.68053	1.10636	0.64064
YJL062W-A	COA3	TFIID	2	2.31286	2.11606	0.391725
YGR119C	NUP57	TFIID	2	1.43651	1.39058	0.431769
YOR007C	SGT2	TFIID	2	2.07533	1.63239	0.848719
YPL207W	TYW1	TFIID	2	1.62055	1.23034	0.539024
YPL064C	CWC27	TFIID	3	2.25172	1.28459	0.728826
YBL040C	ERD2	TFIID	3	1.90192	1.51145	0.344543
YOR101W	RAS1	TFIID	2	1.91972	1.20821	0.6797
YAL023C	PMT2	TFIID	2	1.27606	0.922924	0.155701
YNL197C	WHI3	TFIID	2	1.08908	1.18306	0.349508
YNR030W	ALG12	TFIID	2	2.01438	1.42267	0.580542
YDL235C	YPD1	TFIID	2	2.21811	1.04166	0.41153
YBR164C	ARL1	TFIID	2	1.68605	0.929017	0.525652
YPL112C	PEX25	TFIID	2	1.72566	1.4583	0.496298
YFL036W	RPO41	TFIID	2	1.66755	1.1165	0.50176
YHL030W	ECM29	TFIID	2	1.93914	1.41418	0.739743
YLR328W	NMA1	TFIID	2	1.60454	0.960901	0.0711052
YGL256W	ADH4	TFIID	2	1.82059	1.25474	0.342435
YCL005W-A	VMA9	TFIID	3	1.64287	1.03712	0.946279
YHL039W	EFM1	TFIID	3	1.87153	1.16376	0.0795115
YPL199C	YPL199C	TFIID	2	2.04812	1.81267	0.609548
YBL101C	ECM21	TFIID	2	1.73176	1.09526	-0.0233634
YGR132C	PHB1	TFIID	2	1.75385	1.50957	0.555908
YKL190W	CNB1	TFIID	2	1.97685	1.32252	0.499137
YHR072W-A	NOP10	TFIID	3	2.1384	1.8888	0.575622
YMR024W	MRPL3	TFIID	2	1.67453	1.28279	0.427166
YBR201W	DER1	TFIID	2	2.36199	1.09908	0.278925
YNL131W	TOM22	TFIID	3	2.17773	1.5263	0.790099
YBR198C	TAF5	TFIID	2	1.28873	0.97944	0.525407
YNL199C	GCR2	TFIID	2	1.53613	1.31557	0.417173
YFR002W	NIC96	TFIID	2	1.54602	1.31318	0.400775
YNL189W	SRP1	TFIID	2	1.32416	0.910541	0.217305
YDR289C	RTT103	TFIID	2	1.98748	1.41338	0.753829
YMR183C	SSO2	TFIID	2	1.42025	1.3951	0.839943
YER120W	SCS2	TFIID	3	1.47889	0.642861	0.48202
YGR082W	TOM20	TFIID	2	1.68097	1.48613	0.598129
YPL059W	GRX5	TFIID	3	2.71752	1.33444	0.947464
YDR140W	MTQ2	TFIID	2	2.01524	1.0076	0.495614
YGR020C	VMA7	TFIID	2	1.58083	1.45003	0.180324
YBR127C	VMA2	TFIID	2	1.33373	0.773364	0.330298
YGL211W	NCS6	TFIID	2	1.98853	1.56441	0.611905
YIL076W	SEC28	TFIID	2	1.89143	0.876202	0.486724
YNL312W	RFA2	TFIID	3	1.98488	1.59171	0.62052
YGR210C	YGR210C	TFIID	2	1.6783	1.48196	0.608664
YGR038W	ORM1	TFIID	3	2.41677	1.42427	0.759691
YMR258C	ROY1	TFIID	2	1.9446	1.43284	0.397296
YPR098C	YPR098C	TFIID	2	2.27998	1.37962	0.280553
YER025W	GCD11	TFIID	2	1.53193	1.09872	0.521865
YKL216W	URA1	CR	1	1.79779	1.4583	0.511999
YJL165C	HAL5	TFIID	2	1.62629	0.78111	0.428023
YDR512C	EMI1	TFIID	2	2.05576	1.74656	0.202912
YGR264C	MES1	TFIID	2	1.37547	1.21988	0.364864
YDL212W	SHR3	TFIID	2	2.06491	1.68652	0.70121
YDR028C	REG1	TFIID	2	1.47891	0.989683	0.327596
YPR124W	CTR1	TFIID	2	3.19229	2.33147	1.17291
YJL102W	MEF2	TFIID	2	1.74375	1.17532	0.71585
YJL143W	TIM17	TFIID	2	1.25983	1.31208	0.107794
YIL078W	THS1	TFIID	2	1.55162	1.10089	0.524123
YDL241W	YDL241W	TFIID	1	2.05832	1.15996	-0.046492
YLR163C	MAS1	TFIID	3	1.81313	1.2779	0.637744
YBR172C	SMY2	TFIID	2	1.48307	1.0363	0.442549
YEL032W	MCM3	TFIID	2	1.74402	1.10645	0.335016
YKL128C	PMU1	TFIID	3	1.37793	1.60669	0.184629
YJR007W	SUI2	TFIID	2	1.55884	1.13644	0.766734
YGL047W	ALG13	TFIID	3	2.2516	1.20505	0.461734
YDR052C	DBF4	TFIID	2	1.63693	0.904548	0.410351
YBR154C	RPB5	TFIID	2	1.55088	1.23705	0.501103
YER017C	AFG3	TFIID	2	1.59423	1.0164	0.385709
YDR103W	STE5	TFIID	2	1.6529	1.35261	0.450794
YGR135W	PRE9	TFIID	3	1.80006	1.25483	0.642324
YGL043W	DST1	TFIID	3	1.51837	1.45273	0.578273
YNL002C	RLP7	TFIID	2	1.75157	1.02087	0.483384
YNL322C	KRE1	TFIID	2	1.22238	1.41714	0.167569
YDL160C	DHH1	TFIID	2	1.30463	1.0093	0.470317
YNL056W	OCA2	TFIID	2	1.35705	0.946234	0.887675
YGL238W	CSE1	TFIID	2	1.72737	1.31996	0.560031
YLR224W	YLR224W	TFIID	2	1.62809	1.64997	0.728348
YHR082C	KSP1	TFIID	2	1.33152	0.954523	0.386739
YOL116W	MSN1	CR	2	1.86343	1.70027	0.51568
YKL069W	YKL069W	TFIID	3	2.57416	1.53835	0.404961
YJL051W	IRC8	TFIID	2	1.99572	1.26377	0.41777
YFL018C	LPD1	TFIID	2	1.35447	0.723016	0.148758
YOR326W	MYO2	TFIID	2	1.34983	0.956381	0.264473
YER049W	TPA1	TFIID	2	1.80642	1.44444	0.584863
YPR045C	THP3	CR	3	1.91745	1.51744	0.693198
YNL177C	MRPL22	TFIID	3	1.29697	1.07051	0.830223
YPL255W	BBP1	TFIID	2	1.52585	0.905617	0.465881
YGL133W	ITC1	TFIID	2	1.82341	0.954307	0.28123
YPR109W	YPR109W	TFIID	2	2.26982	1.54434	0.728583
YIL094C	LYS12	TFIID	2	1.5391	1.13272	0.213307
YBR187W	GDT1	TFIID	3	1.80948	0.977742	0.162295
YPL093W	NOG1	TFIID	2	1.28073	1.04485	0.379499
YNL045W	LAP2	TFIID	2	1.72362	1.39155	0.493321
YBL011W	SCT1	TFIID	2	1.78589	1.22812	0.430022
YER111C	SWI4	TFIID	2	1.61352	1.10179	0.334068
YEL052W	AFG1	TFIID	2	2.24732	1.40573	0.3493
YOR078W	BUD21	TFIID	2	1.43858	0.599058	0.397787
YFL022C	FRS2	TFIID	2	1.58984	1.42063	0.619005
YHL034C	SBP1	TFIID	3	1.17284	1.09275	0.548076
YDR272W	GLO2	TFIID	2	2.09826	1.29228	0.573783
YNL044W	YIP3	TFIID	3	2.08781	1.47575	0.495076
YML022W	APT1	TFIID	2	1.86018	1.20135	0.534279
YPL184C	MRN1	TFIID	2	1.48178	1.08603	0.337767
YMR215W	GAS3	TFIID	2	1.11963	0.87205	0.285186
YNL221C	POP1	TFIID	2	1.4215	1.06019	0.328857
YKL211C	TRP3	TFIID	2	1.97814	1.55868	0.415741
YDL134C	PPH21	TFIID	2	1.1734	0.761838	0.269792
YOL081W	IRA2	TFIID	2	1.65117	1.22423	0.471929
YLR006C	SSK1	TFIID	2	1.70981	1.07156	0.306493
YHR059W	FYV4	TFIID	3	2.86133	2.40514	0.881719
YDR384C	ATO3	TFIID	2	1.64375	1.1847	0.479505
YPR062W	FCY1	TFIID	2	2.00701	1.81002	0.612557
YOR150W	MRPL23	TFIID	3	2.45248	1.76405	0.91747
YHR026W	VMA16	TFIID	2	1.96539	1.29425	0.760848
YOR210W	RPB10	TFIID	2	1.84209	1.12687	0.565171
YGL234W	ADE5,7	TFIID	2	1.62489	1.29258	0.515053
YFL033C	RIM15	TFIID	2	2.08323	1.64658	0.48549
YLR197W	NOP56	TFIID	2	1.38589	0.81144	0.469398
YER112W	LSM4	TFIID	3	2.31369	1.29251	0.8696
YDL051W	LHP1	TFIID	3	1.89061	0.997678	0.538357
YDR091C	RLI1	TFIID	2	1.45785	1.13859	0.439651
YMR134W	ERG29	TFIID	2	1.98997	1.53304	0.639171
YIL130W	ASG1	TFIID	2	1.52389	1.16632	0.463756
YFR040W	SAP155	TFIID	2	1.52932	1.01675	0.667152
YJL140W	RPB4	TFIID	3	1.65654	1.22393	0.651205
YBR056W	YBR056W	TFIID	3	2.15514	1.24982	0.432643
YOR341W	RPA190	TFIID	2	1.34257	1.12074	0.582095
YNL287W	SEC21	TFIID	2	1.48271	0.933733	0.47833
YGL048C	RPT6	TFIID	2	1.58156	1.52578	0.762942
YLL048C	YBT1	TFIID	2	1.58222	1.18057	0.501079
YLR356W	ATG33	TFIID	3	2.92582	2.1811	0.989777
YKR003W	OSH6	TFIID	3	2.53779	2.01824	0.478864
YCR030C	SYP1	TFIID	2	1.61178	1.17458	0.252196
YCL012C	YCL012C	TFIID	2	2.29778	1.23499	0.149395
YDR518W	EUG1	TFIID	2	1.99545	0.848519	0.378784
YAR002W	NUP60	TFIID	2	1.74574	1.64494	0.548122
YPL247C	YPL247C	TFIID	2	1.48253	0.790305	-0.19179
YGR198W	YPP1	TFIID	2	1.54919	0.831262	0.11485
YGL101W	YGL101W	TFIID	2	1.56779	1.38139	0.674644
YHR002W	LEU5	TFIID	2	2.06088	1.58176	0.77955
YPL116W	HOS3	TFIID	2	1.57167	0.940087	0.411294
YBR003W	COQ1	TFIID	3	2.26028	1.57624	0.699794
YDL195W	SEC31	TFIID	2	1.33964	1.2644	0.372141
YOR131C	YOR131C	TFIID	3	2.03501	0.974896	0.245508
YJL111W	CCT7	TFIID	2	1.34798	1.01354	0.499709
YHR134W	WSS1	TFIID	4	1.62482	1.39265	0.399396
YJL149W	DAS1	TFIID	2	1.59016	0.954574	1.02157
YER018C	SPC25	TFIID	3	2.84659	2.06939	0.840727
YML041C	VPS71	TFIID	3	1.79248	1.22142	0.462025
YPL053C	KTR6	TFIID	2	1.89566	1.25377	0.621998
YLR417W	VPS36	TFIID	2	1.83489	1.39198	0.525086
YIL050W	PCL7	TFIID	2	1.40348	1.31566	0.464242
YNL249C	MPA43	TFIID	3	2.32698	2.13002	0.483923
YKR062W	TFA2	TFIID	3	2.08291	1.35204	0.571337
YNL243W	SLA2	TFIID	2	1.4617	1.19196	0.453102
YDL138W	RGT2	TFIID	2	1.48378	1.16696	0.475446
YLR152C	YLR152C	TFIID	3	1.79213	1.25526	0.165268
YDL005C	MED2	TFIID	3	1.96672	1.38412	0.636572
YDL175C	AIR2	TFIID	3	2.20855	1.17177	0.746226
YDL215C	GDH2	TFIID	2	2.09797	1.56953	0.644239
YML125C	PGA3	TFIID	2	1.97122	1.23186	0.288013
YKL007W	CAP1	TFIID	3	2.17499	1.86821	0.688352
YPR183W	DPM1	TFIID	2	1.90892	1.55169	0.580868
YBL006C	LDB7	TFIID	3	1.72031	1.12157	0.102263
YER065C	ICL1	TFIID	2	1.27289	0.872134	0.388461
YGL220W	FRA2	TFIID	2	2.17647	1.91207	0.400304
YGL166W	CUP2	TFIID	3	1.98189	1.43531	0.229677
YGL068W	MNP1	TFIID	4	2.09611	1.33304	0.673369
YML111W	BUL2	TFIID	2	1.73705	1.12427	0.415927
YIL041W	GVP36	TFIID	3	1.797	1.80136	0.448147
YIL109C	SEC24	TFIID	2	1.85914	1.29768	0.470455
YLR046C	YLR046C	TFIID	3	1.68677	1.29884	-0.0630912
YNR068C	YNR068C	TFIID	2	2.44053	1.89498	0.815911
YJL181W	YJL181W	TFIID	2	1.63191	1.07159	0.381618
YDL084W	SUB2	TFIID	2	1.35822	1.00256	0.431189
YPL149W	ATG5	TFIID	2	2.44423	1.5438	0.819916
YDL053C	PBP4	TFIID	3	2.25081	1.01327	0.659257
YPR187W	RPO26	TFIID	3	1.59153	0.964837	0.961144
YKL074C	MUD2	TFIID	2	2.09522	1.59779	0.702414
YML108W	YML108W	TFIID	2	2.21972	1.49967	0.643367
YJR065C	ARP3	TFIID	2	1.73242	0.857351	0.683959
YMR041C	ARA2	TFIID	3	2.18685	1.30785	0.307792
YDR404C	RPB7	TFIID	3	1.91419	0.881626	0.608659
YOL071W	SDH5	TFIID	3	1.89711	1.33985	0.557325
YOR197W	MCA1	TFIID	3	1.22955	0.844757	0.341272
YBR236C	ABD1	TFIID	2	1.71106	1.04763	0.376619
YDL002C	NHP10	TFIID	2	1.83915	1.52037	0.773928
YLR436C	ECM30	TFIID	2	1.39713	1.08595	0.199814
YLR212C	TUB4	TFIID	2	2.02755	1.43904	0.202484
YLL013C	PUF3	TFIID	2	1.4969	1.13808	0.534873
YOR261C	RPN8	TFIID	3	1.55099	1.11541	0.564143
YOR140W	SFL1	TFIID	2	1.33125	0.913646	0.405737
YDL035C	GPR1	TFIID	2	1.77464	1.23756	0.552505
YER079W	YER079W	TFIID	3	1.79474	1.37295	0.277278
YEL013W	VAC8	TFIID	2	1.73347	1.5819	0.637894
YBL085W	BOI1	TFIID	2	1.60387	1.04734	0.308667
YLR009W	RLP24	TFIID	2	1.86131	1.28874	0.56013
YMR189W	GCV2	TFIID	2	1.63731	1.19039	0.23535
YGL245W	GUS1	TFIID	2	1.70625	1.44097	0.59122
YOR286W	RDL2	TFIID	3	1.50546	1.38126	0.275225
YPL178W	CBC2	TFIID	3	1.75591	1.30763	0.558487
YHL003C	LAG1	TFIID	2	1.76412	1.34289	0.281344
YDR179W-A	YDR179W-A	TFIID	2	1.8688	1.23736	0.177328
YPL239W	YAR1	TFIID	2	2.14736	1.60667	1.01006
YLR345W	YLR345W	TFIID	3	1.84241	1.19828	0.413996
YPR133C	SPN1	TFIID	3	1.351	0.809793	0.51593
YER087C-B	SBH1	TFIID	3	2.38033	1.75678	0.601899
YGR284C	ERV29	TFIID	3	1.86713	1.4845	0.630768
YMR298W	LIP1	TFIID	3	2.54946	1.84671	0.631311
YDR023W	SES1	TFIID	2	1.49985	0.86607	0.445288
YFR044C	DUG1	TFIID	3	1.79408	1.31496	0.480406
YKL195W	MIA40	TFIID	3	1.76018	1.092	0.519509
YDL092W	SRP14	TFIID	3	1.54594	1.27273	0.53396
YPR103W	PRE2	TFIID	3	1.62523	1.14172	0.568723
YIL046W	MET30	TFIID	2	1.98307	1.51984	0.476843
YBL051C	PIN4	TFIID	2	1.36903	0.972577	0.397867
YOL130W	ALR1	TFIID	2	1.40455	0.931641	0.187685
YMR076C	PDS5	TFIID	2	1.56453	1.03224	0.300609
YOR163W	DDP1	TFIID	4	1.7137	1.59345	0.26966
YIL077C	YIL077C	TFIID	3	1.65809	1.37155	0.582379
YOR260W	GCD1	TFIID	2	1.50147	1.28853	0.689042
YOR283W	YOR283W	TFIID	3	1.87052	1.19613	0.381204
YDL145C	COP1	TFIID	2	1.56827	1.21097	0.496424
YPR060C	ARO7	TFIID	3	2.09894	2.00403	0.828166
YNL149C	PGA2	TFIID	3	2.11875	0.840569	0.485899
YHR142W	CHS7	TFIID	2	1.47199	0.981239	0.518986
YHL031C	GOS1	TFIID	3	2.78821	1.68061	0.935504
YCL063W	VAC17	TFIID	3	1.52891	1.04461	0.450252
YHR047C	AAP1	TFIID	2	1.91005	1.43976	0.606956
YHR004C	NEM1	TFIID	3	2.23229	1.54229	0.717185
YGR235C	MIC26	TFIID	3	1.66824	1.30203	0.909612
YDL120W	YFH1	TFIID	3	1.98984	1.14566	0.333467
YOR372C	NDD1	TFIID	2	1.67757	1.5028	0.447701
YKL080W	VMA5	TFIID	3	1.79518	1.33462	0.606459
YBL061C	SKT5	TFIID	2	1.72425	1.26255	0.48597
YER154W	OXA1	TFIID	2	1.6803	1.22748	0.273517
YOL051W	GAL11	TFIID	2	1.57827	1.25079	0.338581
YDR280W	RRP45	TFIID	3	1.21731	1.0353	0.382992
YPR131C	NAT3	TFIID	3	1.79556	1.3325	0.13458
YNL191W	DUG3	TFIID	2	2.09472	2.2047	0.615637
YJL056C	ZAP1	TFIID	2	1.63639	1.34121	0.172025
YPR101W	SNT309	TFIID	3	1.61928	1.26423	0.387909
YJR139C	HOM6	TFIID	3	1.9205	1.24093	0.523804
YGL105W	ARC1	TFIID	2	1.52863	1.13627	0.470779
YGL039W	YGL039W	TFIID	2	2.10673	1.62102	0.761037
YBR289W	SNF5	TFIID	2	1.97991	1.24629	0.629962
YGR063C	SPT4	TFIID	3	1.99828	1.33585	0.591661
YKR038C	KAE1	TFIID	3	1.99207	1.33228	0.427021
YMR319C	FET4	CR	2	1.74868	1.20412	0.667695
YIL125W	KGD1	TFIID	2	1.42957	1.22326	0.280229
YML031W	NDC1	TFIID	2	1.64348	1.28084	0.579571
YJL174W	KRE9	TFIID	3	1.49918	1.18869	0.53722
YIL070C	MAM33	TFIID	3	2.15711	1.45808	0.669516
YKL113C	RAD27	TFIID	3	1.88726	1.15212	0.505856
YER050C	RSM18	TFIID	3	1.99886	1.69483	0.945375
YLR430W	SEN1	TFIID	2	1.59121	1.16477	0.496939
YNL166C	BNI5	TFIID	2	1.78999	1.38711	0.477096
YOR193W	PEX27	TFIID	2	1.61535	1.04657	0.227527
YGR172C	YIP1	TFIID	3	1.97673	1.58931	0.592386
YCL011C	GBP2	TFIID	2	1.6533	1.16667	0.546884
YLR186W	EMG1	TFIID	3	1.86082	1.62319	0.484194
YLR446W	YLR446W	TFIID	4	1.9991	1.28299	0.267514
YDR454C	GUK1	TFIID	2	1.85037	0.965972	0.10319
YOR241W	MET7	TFIID	3	2.00052	1.41266	0.533464
YJL053W	PEP8	TFIID	2	1.76674	1.18723	0.149383
YGL145W	TIP20	TFIID	2	1.65024	1.24979	0.564437
YGL252C	RTG2	TFIID	3	1.70877	1.19925	0.788045
YPR024W	YME1	TFIID	3	1.87098	1.38127	0.669776
YMR255W	GFD1	TFIID	4	1.61296	1.00051	0.589824
YNL006W	LST8	TFIID	2	2.48923	1.7009	0.593962
YDR427W	RPN9	TFIID	2	1.74659	1.31007	0.826656
YLR107W	REX3	TFIID	3	1.78525	1.76535	0.575478
YPR125W	YLH47	TFIID	3	1.85839	1.36004	0.390517
YDR400W	URH1	TFIID	3	1.67993	1.23975	0.52721
YDR063W	AIM7	TFIID	4	2.39041	1.47497	0.661858
YLR175W	CBF5	TFIID	2	1.27742	1.01036	0.441887
YDR017C	KCS1	TFIID	2	1.33023	1.00352	0.305557
YOR296W	YOR296W	TFIID	3	1.97114	1.23753	0.393917
YCR069W	CPR4	TFIID	3	1.74819	1.33892	0.30006
YDL001W	RMD1	TFIID	3	2.52508	1.69476	0.491802
YGR156W	PTI1	CR	3	1.6934	1.40237	0.722918
YNL229C	URE2	TFIID	2	1.43165	0.892417	0.389783
YMR039C	SUB1	TFIID	3	1.49397	0.696409	0.628475
YGL073W	HSF1	TFIID	2	1.46322	0.719275	0.522495
YMR200W	ROT1	TFIID	3	1.8747	1.4401	0.632927
YIL144W	NDC80	TFIID	2	1.5094	1.10175	0.331493
YDR357C	CNL1	TFIID	3	2.7086	1.47914	0.811155
YOR256C	TRE2	TFIID	3	2.42019	1.92519	0.816312
YMR161W	HLJ1	TFIID	2	1.7794	1.27794	0.623398
YDL095W	PMT1	TFIID	2	1.34516	0.966697	0.194208
YHR146W	CRP1	TFIID	3	1.44854	0.890925	0.251488
YNL290W	RFC3	TFIID	3	1.56057	0.99689	0.2691
YNL081C	SWS2	TFIID	3	2.10629	1.62318	0.831831
YMR146C	TIF34	TFIID	2	1.2648	1.00213	0.349925
YMR091C	NPL6	TFIID	2	1.64388	1.31734	0.420059
YLR025W	SNF7	TFIID	3	1.83497	1.10234	0.483855
YDL188C	PPH22	TFIID	3	1.88186	1.18253	0.583188
YBR087W	RFC5	TFIID	2	2.05807	1.29406	0.741655
YJL055W	YJL055W	TFIID	3	1.80098	1.19402	0.321637
YIL138C	TPM2	TFIID	2	1.94865	1.16547	0.528827
YKL042W	SPC42	TFIID	3	1.50434	1.21229	0.604871
YKR011C	YKR011C	TFIID	3	2.19866	1.25445	0.595306
YMR012W	CLU1	TFIID	2	1.74008	1.19951	0.507441
YDL027C	YDL027C	TFIID	3	2.19881	1.90869	0.594242
YLR266C	PDR8	TFIID	2	1.69978	1.10978	0.155262
YPL181W	CTI6	TFIID	2	1.72089	1.15461	0.463859
YPR070W	MED1	TFIID	2	1.99732	1.65338	0.714702
YML074C	FPR3	TFIID	2	1.76626	1.15053	0.649755
YNR029C	YNR029C	TFIID	2	1.65003	1.01346	0.512932
YDR202C	RAV2	TFIID	2	2.3685	1.6279	0.409488
YOR270C	VPH1	TFIID	2	1.37605	1.02897	0.344377
YOR127W	RGA1	TFIID	2	1.68888	1.26105	0.411869
YBL107C	MIX23	TFIID	3	2.53022	1.482	0.582418
YDR013W	PSF1	TFIID	3	2.13288	1.69476	0.817525
YMR309C	NIP1	TFIID	2	1.46	1.10454	0.529484
YJL133W	MRS3	TFIID	2	1.73396	1.21364	0.348198
YBL050W	SEC17	TFIID	3	2.11989	1.62268	0.770974
YPL152W	RRD2	TFIID	3	2.0417	1.458	0.555681
YNR034W	SOL1	TFIID	3	2.21144	1.40915	0.633261
YHL002W	HSE1	TFIID	3	1.87675	1.5221	0.63706
YFR050C	PRE4	TFIID	3	1.87152	1.76496	0.792444
YOR176W	HEM15	TFIID	3	2.13378	1.38388	0.324813
YCR033W	SNT1	TFIID	2	1.54867	0.891861	0.545089
YNL161W	CBK1	TFIID	2	1.34259	0.961441	0.384067
YOL137W	BSC6	TFIID	3	2.16483	1.03814	0.823688
YGL197W	MDS3	TFIID	2	1.50132	1.03179	0.415671
YDR266C	HEL2	TFIID	2	1.65815	1.47069	0.416738
YDR152W	GIR2	TFIID	2	1.73018	1.59295	0.797909
YFR052W	RPN12	TFIID	3	1.96057	1.14159	0.94272
YCR036W	RBK1	TFIID	3	1.62223	1.02557	0.367722
YLL001W	DNM1	TFIID	3	2.22312	1.33658	0.58626
YLL051C	FRE6	TFIID	2	1.68368	1.43074	0.153762
YMR290C	HAS1	TFIID	2	1.46463	1.17958	0.389023
YML025C	YML6	TFIID	3	1.81036	1.20147	0.322401
YHR205W	SCH9	TFIID	2	1.79488	1.71147	0.680393
YPR040W	TIP41	TFIID	2	2.10295	1.78782	0.550015
YBR159W	IFA38	TFIID	2	1.80811	1.32655	0.356615
YLR231C	BNA5	TFIID	2	1.87907	1.52428	0.369465
YGL091C	NBP35	TFIID	3	1.6336	1.09314	0.537298
YLR206W	ENT2	TFIID	3	1.40636	1.20965	0.418517
YOR117W	RPT5	TFIID	3	1.98004	1.33927	0.983461
YER021W	RPN3	TFIID	2	1.47686	1.01644	0.459949
YHR058C	MED6	TFIID	2	2.38323	1.66655	0.450766
YHR181W	SVP26	TFIID	3	2.4034	1.77257	0.555507
YOR361C	PRT1	TFIID	2	1.64515	1.34628	0.584624
YKL063C	YKL063C	TFIID	2	1.94155	1.02134	0.700841
YJL148W	RPA34	TFIID	2	1.8799	1.08664	0.554306
YGR142W	BTN2	CR	1	1.98198	1.29002	1.62064
YNL113W	RPC19	TFIID	3	2.27629	0.774438	1.01469
YDL007W	RPT2	TFIID	3	1.61207	1.17579	0.424803
YDR452W	PPN1	TFIID	2	1.47659	1.00283	0.368795
YMR033W	ARP9	TFIID	3	1.73141	0.947612	0.567541
YIL063C	YRB2	TFIID	2	1.71576	0.99363	0.178746
YML001W	YPT7	TFIID	3	2.47003	1.45747	0.442708
YJL005W	CYR1	TFIID	2	1.83267	1.49524	0.523514
YPL160W	CDC60	TFIID	2	1.49941	1.45202	0.489391
YHR098C	SFB3	TFIID	2	1.61308	1.3472	0.411088
YJR090C	GRR1	TFIID	2	1.8471	1.38343	0.61289
YDL085C-A	YDL085C-A	TFIID	3	1.45682	1.17033	0.306578
YKR001C	VPS1	TFIID	3	1.97992	1.53433	0.538516
YML006C	GIS4	TFIID	2	1.87952	1.13853	0.199439
YMR210W	YMR210W	TFIID	2	1.51041	0.981878	0.0341511
YOR098C	NUP1	TFIID	2	1.43076	1.18179	0.444049
YOR080W	DIA2	TFIID	2	1.37099	0.907764	0.357545
YJR076C	CDC11	TFIID	3	1.88057	1.24877	0.529061
YPR033C	HTS1	TFIID	2	1.65639	1.47554	0.521964
YDL019C	OSH2	TFIID	2	1.89558	1.32467	0.419574
YPR042C	PUF2	TFIID	2	1.70792	1.39793	0.638259
YOR033C	EXO1	TFIID	2	1.61626	1.26686	0.456097
YOR195W	SLK19	TFIID	2	1.95476	1.03819	0.601685
YPR093C	ASR1	TFIID	4	1.68291	1.16071	0.775709
YLL010C	PSR1	TFIID	2	1.86047	1.33002	0.580519
YDL074C	BRE1	TFIID	2	1.56663	0.959242	0.543291
YBR133C	HSL7	TFIID	2	1.60676	1.2446	0.338593
YDL088C	ASM4	TFIID	2	1.8163	1.16242	0.704698
YOR074C	CDC21	TFIID	3	2.00535	1.69751	0.181574
YHL010C	ETP1	TFIID	2	2.20296	1.72766	0.496159
YNR050C	LYS9	TFIID	2	2.51729	1.79597	0.527763
YPL047W	SGF11	TFIID	3	1.95277	2.20256	0.563301
YPL268W	PLC1	TFIID	3	1.73582	0.98689	0.362374
YGR253C	PUP2	TFIID	3	1.87806	1.11221	0.827471
YEL015W	EDC3	TFIID	3	1.77463	0.867601	0.493239
YER174C	GRX4	TFIID	2	1.44901	1.39185	0.200007
YGR026W	YGR026W	TFIID	3	1.64259	0.837252	0.661116
YOR021C	SFM1	TFIID	2	1.75312	1.1275	0.469868
YOR147W	MDM32	TFIID	2	1.50234	1.19758	0.538064
YKL058W	TOA2	TFIID	4	2.02332	1.77999	0.96319
YLR347C	KAP95	TFIID	2	1.37948	1.33921	0.44482
YNL077W	APJ1	TFIID	2	2.16479	1.48379	0.777941
YFL010C	WWM1	TFIID	3	2.25377	1.76624	0.525118
YFR039C	OSW7	TFIID	3	2.29107	1.41916	0.344745
YNL259C	ATX1	TFIID	3	2.04839	1.51661	0.385598
YNL082W	PMS1	TFIID	2	1.83566	1.32144	0.335473
YHR086W	NAM8	TFIID	2	1.55371	1.28038	0.355168
YJR060W	CBF1	TFIID	3	1.24398	0.488651	0.104022
YDR358W	GGA1	TFIID	2	1.96222	1.28059	0.413284
YBL058W	SHP1	TFIID	3	1.75962	1.26332	0.68962
YML038C	YMD8	TFIID	2	1.41626	0.974258	0.13316
YBL038W	MRPL16	TFIID	4	2.42409	1.41195	0.963421
YMR061W	RNA14	TFIID	3	1.80642	1.39522	0.657127
YPR051W	MAK3	TFIID	3	1.61436	0.844077	0.414408
YJL001W	PRE3	TFIID	3	2.28105	1.41897	0.927963
YEL031W	SPF1	TFIID	3	1.7053	1.35791	0.455616
YKL020C	SPT23	TFIID	2	1.66419	1.29598	0.536289
YJR003C	YJR003C	CR	2	1.12728	0.898856	0.0230219
YPR105C	COG4	TFIID	2	1.53635	1.13261	0.336777
YBR171W	SEC66	TFIID	3	1.94363	1.32445	0.818831
YDR531W	CAB1	TFIID	3	1.80987	2.14296	0.392077
YGL003C	CDH1	TFIID	3	2.13759	1.61658	0.620402
YDR378C	LSM6	TFIID	4	1.92413	2.20623	1.21635
YJL173C	RFA3	TFIID	3	1.92415	1.5712	0.64939
YOR381W	FRE3	TFIID	2	1.43432	1.04039	-0.16177
YOR359W	VTS1	TFIID	2	1.88632	1.29825	0.501024
YEL006W	YEA6	TFIID	2	2.38952	1.70423	0.742599
YKL047W	ANR2	TFIID	3	1.9453	1.3403	0.35244
YER125W	RSP5	TFIID	2	1.59341	1.1544	0.447346
YDR062W	LCB2	TFIID	2	1.83622	1.09252	0.281911
YOR020W-A	YOR020W-A	TFIID	3	2.02813	1.7612	1.04713
YNL238W	KEX2	TFIID	2	1.68705	1.36395	0.410811
YDR143C	SAN1	TFIID	2	1.60041	1.15824	0.537847
YOR307C	SLY41	TFIID	3	1.79946	1.20904	0.541018
YHR206W	SKN7	TFIID	2	1.7393	1.32089	0.405777
YEL043W	YEL043W	TFIID	2	1.95928	1.46227	0.599213
YLR073C	RFU1	TFIID	3	1.33248	1.12111	0.0849031
YMR022W	UBC7	TFIID	3	2.62675	2.02503	1.16173
YDR097C	MSH6	TFIID	2	1.65459	1.04976	0.302405
YBL036C	YBL036C	TFIID	2	1.93745	1.28577	0.723403
YDL097C	RPN6	TFIID	3	1.64011	1.65899	0.923759
YHR165C	PRP8	TFIID	2	1.60638	1.11559	0.522936
YLR050C	YLR050C	TFIID	3	1.63497	0.691737	0.532851
YFR041C	ERJ5	TFIID	3	2.30183	1.51261	0.835517
YKL068W	NUP100	TFIID	2	1.67377	1.16053	0.402749
YJR113C	RSM7	TFIID	3	2.32352	1.71352	0.466628
YJL178C	ATG27	TFIID	4	2.18269	1.39499	0.409804
YPL042C	SSN3	TFIID	3	2.33327	1.70019	0.638863
YMR260C	TIF11	TFIID	3	2.15413	1.27378	0.757881
YKL057C	NUP120	TFIID	2	1.80771	1.16827	0.535193
YIL035C	CKA1	TFIID	3	1.61507	0.892745	0.571067
YCR053W	THR4	TFIID	2	1.8932	1.17656	0.553048
YJR110W	YMR1	TFIID	3	2.38476	1.54141	0.488321
YMR092C	AIP1	TFIID	2	1.74594	1.48445	0.345567
YMR077C	VPS20	TFIID	2	2.29715	1.50136	0.500261
YDL190C	UFD2	TFIID	2	1.69552	1.11821	0.452293
YGR106C	VOA1	TFIID	2	1.71362	0.914852	0.47169
YLR380W	CSR1	TFIID	2	1.61097	0.93051	0.221106
YHL004W	MRP4	TFIID	3	1.92412	1.28177	0.422058
YDR409W	SIZ1	TFIID	3	1.863	1.34243	0.395953
YHR200W	RPN10	TFIID	3	1.96599	1.43885	0.872921
YLR370C	ARC18	TFIID	3	2.86899	2.09401	1.12183
YJR058C	APS2	TFIID	2	1.92657	1.22309	0.46134
YOL070C	NBA1	TFIID	3	1.89054	1.31475	0.459737
YPR072W	NOT5	TFIID	3	1.75307	1.33178	0.609284
YDR363W-A	SEM1	TFIID	4	2.25936	1.45518	0.626141
YKL219W	COS9	TFIID	2	2.10003	1.18691	0.332099
YHR019C	DED81	TFIID	3	1.77229	1.34016	0.519824
YCR002C	CDC10	TFIID	3	1.63159	1.04805	0.439857
YMR064W	AEP1	TFIID	2	1.78924	0.935549	0.360161
YMR144W	YMR144W	TFIID	3	1.64583	1.15723	0.642212
YIL135C	VHS2	TFIID	3	1.39325	1.16399	0.301987
YDR150W	NUM1	TFIID	2	1.67628	1.28683	0.581504
YGR257C	MTM1	TFIID	3	1.68589	1.77645	0.3744
YJR054W	KCH1	TFIID	2	1.67047	1.2054	0.271869
YGL167C	PMR1	TFIID	3	1.75251	1.52894	0.41157
YDR208W	MSS4	TFIID	2	1.75888	1.13709	0.360935
YGR195W	SKI6	TFIID	3	2.00334	1.41349	0.813759
YBL084C	CDC27	TFIID	3	2.07326	1.29547	0.768587
YHR027C	RPN1	TFIID	3	1.55522	1.12869	0.585731
YDL089W	NUR1	TFIID	3	2.10875	1.35201	0.342002
YMR109W	MYO5	TFIID	2	1.51746	1.56149	0.543012
YER031C	YPT31	TFIID	3	1.72526	1.48678	0.417284
YKL023W	YKL023W	TFIID	3	2.36815	1.14337	0.853922
YDR299W	BFR2	TFIID	2	1.70714	1.20738	0.845703
YBL017C	PEP1	TFIID	3	1.72818	1.19194	0.370344
YHR135C	YCK1	TFIID	3	1.1777	1.1848	0.337225
YDR211W	GCD6	TFIID	2	1.50306	0.765167	0.234895
YBR253W	SRB6	TFIID	4	1.86213	1.32628	0.748874
YLR357W	RSC2	TFIID	2	1.3404	1.22983	0.438851
YDR027C	VPS54	TFIID	2	1.75239	0.914282	0.408272
YDR182W	CDC1	TFIID	3	2.34343	1.66316	0.918002
YOL149W	DCP1	TFIID	4	2.3697	2.41656	0.920627
YNL129W	NRK1	TFIID	3	1.9459	0.930999	0.359966
YBR137W	YBR137W	TFIID	4	2.54458	1.56026	0.657081
YMR197C	VTI1	TFIID	3	1.79418	0.927883	0.397495
YLR401C	DUS3	TFIID	2	1.68926	1.18495	0.355832
YGL222C	EDC1	TFIID	3	1.99086	1.78302	0.646713
YKR068C	BET3	TFIID	3	2.29335	1.95118	0.767022
YHR057C	CPR2	TFIID	3	2.12488	1.64348	0.852216
YMR093W	UTP15	TFIID	2	1.84088	1.23302	0.572687
YOR305W	RRG7	TFIID	3	1.72564	1.07873	0.453288
YLL049W	LDB18	CR	4	2.66962	1.41814	0.814987
YNL025C	SSN8	TFIID	2	1.74642	1.06658	0.407109
YMR120C	ADE17	TFIID	2	1.94629	1.10206	0.341858
YKR048C	NAP1	TFIID	3	1.53787	1.05221	0.455485
YOR321W	PMT3	TFIID	2	1.76415	1.02078	0.397977
YPL259C	APM1	TFIID	2	1.47102	0.972443	0.576106
YNL005C	MRP7	TFIID	3	1.91807	1.44019	0.637907
YPR025C	CCL1	TFIID	3	1.59513	0.632842	0.206981
YBL001C	ECM15	TFIID	3	1.45067	0.853786	0.865956
YKL122C	SRP21	TFIID	3	1.98987	1.43927	0.629717
YOR168W	GLN4	TFIID	2	1.72717	0.997958	0.532434
YPR148C	YPR148C	TFIID	2	1.71534	1.11625	0.427917
YFL037W	TUB2	TFIID	2	1.49365	1.43844	0.307559
YJL183W	MNN11	TFIID	3	2.2289	1.54178	0.787952
YLR247C	IRC20	TFIID	3	1.87806	1.38203	0.589654
YJL008C	CCT8	TFIID	3	1.9183	1.30707	0.776393
YGR147C	NAT2	TFIID	4	1.85067	1.32388	0.648692
YCR035C	RRP43	TFIID	3	1.52404	1.049	0.528062
[truncated: 2,616 more rows]
