# Supplementary material for: BET family members Bdf1/2 modulate global transcription initiation and elongation in Saccharomyces cerevisiae
Source: eLife. 2021 Jun 17;10:e69619. doi: 10.7554/eLife.69619 (PMC8266393; doi:10.7554/eLife.69619)
Supplement: Supplementary file 5. [file elife-69619-supp5.xlsx]

## Sheet: Sheet1
strain	background	description	genotype	reference
BY4705	WT (S. cerevisiae)	WT (S. cerevisiae)	mata ade2△::hisG his3△200 leu2△0 lys2△0 met15△0 trp1△63 ura3△0	Brachmann et al., 1998
SHY1058	WT (S. pombe)	WT (S. pombe)	h- RPB3-3x Flag::NatMX	Warfield et al., 2017
SHY1110	WT (S. pombe)	WT (S. pombe)	h+ leu1-32 ade6-216 OtrR1:ura4 Abp1-3xFlag::KanMX Cbh1-13xMyc::NatMX	Chen et al., 2008
SHY1036	BY4705	WT - degron tagging	RPB3-3x Flag::NatMX, pGPD1-OSTIR::HIS3	Warfield et al., 2017
SHY1235	BY4705	WT - degron tagging	pGPD1-OSTIR::HIS3	this work
SHY1039	SHY1036	Taf1 degron	RPB3-3x Flag::NatMX, pGPD1-OSTIR::HIS3, TAF1-3xV5 IAA7::KanMX	Donczew et al., 2020
SHY1059	SHY1036	bdf2△	RPB3-3x Flag::NatMX, pGPD1-OSTIR::HIS3, bdf2△::HPH	this work
RDY27	SHY1036	Bdf1 degron	RPB3-3x Flag::NatMX, pGPD1-OSTIR::HIS3, BDF1-3xV5 IAA7::KanMX	this work
RDY28	SHY1036	Bdf2 degron	RPB3-3x Flag::NatMX, pGPD1-OSTIR::HIS3, BDF2-3xV5 IAA7::KanMX	this work
RDY70	SHY1235	Bdf2 degron	pGPD1-OSTIR::HIS3, BDF2-3xV5 IAA7::KanMX	this work
RDY73	RDY70	Bdf1/2 degron	pGPD1-OSTIR::HIS3, BDF2-3xV5 IAA7::KanMX, BDF1-3xV5 IAA7::URA3	this work
RDY1	SHY1059	bdf2△, Bdf1 degron	RPB3-3x Flag::NatMX, pGPD1-OSTIR::HIS3, bdf2△::HPH, BDF1-3xV5 IAA7::KanMX	this work
SHY1137	SHY1036	Toa1 degron	RPB3-3x Flag::NatMX, pGPD1-OSTIR::HIS3, TOA1-3xV5 IAA7	this work
SHY1213	SHY1235	Ssl2 degron	pGPD1-OSTIR::HIS3, ssl2△::KanMX/pSH1947 (LEU2 SSL2-3xV5 IAA7)	this work
RDY29	SHY1036	H2A.Z degron	RPB3-3x Flag::NatMX, pGPD1-OSTIR::HIS3, HTZ1-3xV5 IAA7::KanMX	this work
RDY57	SHY1036	Esa1 degron	RPB3-3x Flag::NatMX, pGPD1-OSTIR::HIS3, esa1△::KanMX/pRD8 (LEU2 ESA1-3xV5 IAA7)	this work
RDY44	BY4705	free MNase (BDF2 promoter)	pBDF2-MNase::TRP1	this work
RDY34	RDY27	Bdf1 degron, Bdf2-MNase	RPB3-3x Flag::NatMX, pGPD1-OSTIR::HIS3, BDF1-3xV5 IAA7, BDF2-MNase::TRP1	this work
RDY33	RDY28	Bdf2 degron, Bdf1-MNase	RPB3-3x Flag::NatMX, pGPD1-OSTIR::HIS3, BDF2-3xV5 IAA7, BDF1-MNase::TRP1	this work
RDY59	RDY57	Esa1 degron, Bdf1-MNase	RPB3-3x Flag::NatMX, pGPD1-OSTIR::HIS3, esa1△::KanMX, BDF1-MNase::TRP1/pRD8 (LEU2 ESA1-3xV5 IAA7)	this work
RDY85	SHY1235	Bdf1-3xFlag	pGPD1-OSTIR::HIS3, BDF1-3xFlag::NatMX	this work
RDY86	SHY1235	Bdf2-3xFlag	pGPD1-OSTIR::HIS3, BDF2-3xFlag::NatMX	this work
RDY30	RDY1	bdf2△, Bdf1 degron, Taf1-MNase	RPB3-3x Flag::NatMX, pGPD1-OSTIR::HIS3, bdf2△::HygMX, BDF1-3xV5 IAA7::KanMX, TAF1-MNase::TRP1	this work
RDY21	RDY1	bdf2△, Bdf1 degron, Taf11-MNase	RPB3-3x Flag::NatMX, pGPD1-OSTIR::HIS3, bdf2△::HygMX, BDF1-3xV5 IAA7::KanMX, TAF11-MNase::TRP1	this work
RDY26	RDY1	bdf2△, Bdf1 degron, Med8-MNase	RPB3-3x Flag::NatMX, pGPD1-OSTIR::HIS3, bdf2△::HygMX, BDF1-3xV5 IAA7::KanMX, MED8-MNase::TRP1	this work
RDY50	RDY1	bdf2△, Bdf1 degron, Med17-MNase	RPB3-3x Flag::NatMX, pGPD1-OSTIR::HIS3, bdf2△::HygMX, BDF1-3xV5 IAA7::KanMX, MED17-MNase::TRP1	this work
RDY51	RDY1	bdf2△, Bdf1 degron, Spt3-MNase	RPB3-3x Flag::NatMX, pGPD1-OSTIR::HIS3, bdf2△::HygMX, BDF1-3xV5 IAA7::KanMX, SPT3-MNase::TRP1	this work
SHY1172	SHY1235	Med14 degron, Spt3-MNase	pGPD1-OSTIR::HIS3, MED14-3xV5 IAA7::KanMX, SPT3-MNase::TRP1	this work
SHY1301	SHY1235	Med14 degron, Taf1-MNase	pGPD1-OSTIR::HIS3, MED14-3xV5 IAA7::KanMX, TAF1-MNase::TRP1	this work
SHY1327	SHY1235	Taf13 degron, Med8-MNase	pGPD1-OSTIR::HIS3, TAF13-3xV5 IAA7::KanMX, MED8-MNase::TRP1	this work
SHY1331	SHY1235	Taf13 degron, Spt7-MNase	pGPD1-OSTIR::HIS3, TAF13-3xV5 IAA7::KanMX, SPT7-MNase::TRP1	this work
RDY82	RDY73	Bdf1/2 degron, Taf1-3xFlag	pGPD1-OSTIR::HIS3, BDF2-3xV5 IAA7::KanMX, BDF1-3xV5 IAA7::URA3, TAF1-3xFlag::NatMX	this work
SHY1089	SHY1036	Taf13 degron, TFIIB-13xMyc	RPB3-3x Flag::NatMX, pGPD1-OSTIR::HIS3, TAF13-3xV5 IAA7::KanMX, SUA7-13xMyc::HPH	this work
RDY92	RDY73	Bdf1/2 degron, TFIIB-3xFlag	pGPD1-OSTIR::HIS3, BDF2-3xV5 IAA7::KanMX, BDF1-3xV5 IAA7::URA3, SUA7-3xFlag::NatMX	this work
RDY79	RDY73	Bdf1/2 degron, Bur1-3xFlag	pGPD1-OSTIR::HIS3, BDF2-3xV5 IAA7::KanMX, BDF1-3xV5 IAA7::URA3, BUR1-3xFlag::NatMX	this work
RDY81	RDY73	Bdf1/2 degron, Ctk1-3xFlag	pGPD1-OSTIR::HIS3, BDF2-3xV5 IAA7::KanMX, BDF1-3xV5 IAA7::URA3, CTK1-3xFlag::NatMX	this work
RDY94	RDY73	Bdf1/2 degron, Spt5-3xFlag	pGPD1-OSTIR::HIS3, BDF2-3xV5 IAA7::KanMX, BDF1-3xV5 IAA7::URA3, SPT5-3xFlag::NatMX	this work
