# Supplementary material for: BET family members Bdf1/2 modulate global transcription initiation and elongation in Saccharomyces cerevisiae
Source: eLife. 2021 Jun 17;10:e69619. doi: 10.7554/eLife.69619 (PMC8266393; doi:10.7554/eLife.69619)
Supplement: Supplementary file 6. [file elife-69619-supp6.xlsx]

## Sheet: data
category	strain	experiment	biological replicates
RNA-seq	RDY27	Bdf1 degron	2
RNA-seq	RDY70	Bdf2 degron	2
RNA-seq	SHY1059	bdf2△	2
RNA-seq	RDY73	Bdf1/2 degron	3
RNA-seq	RDY1	bdf2△, Bdf1 degron	2
RNA-seq	SHY1137	Toa1 degron	3
RNA-seq	SHY1213	Ssl2 degron	3
RNA-seq	RDY29	H2A.Z-degron	2
RNA-seq	RDY57	Esa1 degron	2
ChIP-seq	RDY85	Bdf1-3xFlag IP	2
ChIP-seq	RDY86	Bdf2-3xFlag IP	2
ChIP-seq	RDY82	Bdf1/2 degron, Taf1-3xFlag IP	2
ChIP-seq	RDY59	Esa1 degron, H4K12ac IP	2
ChIP-seq	RDY92	Bdf1/2 degron, TFIIB-3xFlag IP	2
ChIP-seq	SHY1089	Taf13 degron, TFIIB-13xMyc IP	2
ChIP-seq	RDY73	Bdf1/2 degron, Rpb1 total IP	2
ChIP-seq	RDY73	Bdf1/2 degron, Rpb1 S2P IP	2
ChIP-seq	RDY73	Bdf1/2 degron, Rpb1 S5P IP	2
ChIP-seq	SHY1039	Taf1 degron, Rpb1 total IP	2
ChIP-seq	SHY1039	Taf1 degron, Rpb1 S2P IP	2
ChIP-seq	SHY1039	Taf1 degron, Rpb1 S5P IP	2
ChIP-seq	RDY79	Bdf1/2 degron, Bur1-3xFlag IP	3
ChIP-seq	RDY81	Bdf1/2 degron, Ctk1-3xFlag IP	2
ChIP-seq	RDY94	Bdf1/2 degron, Spt5-3xFlag IP	2
ChEC-seq	RDY33	Bdf2 degron, Bdf1-MNase	6
ChEC-seq	RDY34	Bdf1 degron, Bdf2-MNase	6
ChEC-seq	RDY59	Esa1 degron, Bdf1-MNase	2
ChEC-seq	RDY30	bdf2△, Bdf1 degron, Taf1-MNase	6
ChEC-seq	RDY21	bdf2△, Bdf1 degron, Taf11-MNase	6
ChEC-seq	RDY26	bdf2△, Bdf1 degron, Med8-MNase	6
ChEC-seq	RDY50	bdf2△, Bdf1 degron, Med17-MNase	6
ChEC-seq	RDY51	bdf2△, Bdf1 degron, Spt3-MNase	6
ChEC-seq	SHY1172	Med14 degron, Spt3-MNase	3
ChEC-seq	SHY1301	Med14 degron, Taf1-MNase	3
ChEC-seq	SHY1327	Taf13 degron, Med8-MNase	3
ChEC-seq	SHY1331	Taf13 degron, Spt7-MNase	3
ChEC-seq	RDY44	free MNase (Bdf2 promoter)	2
